# Supplementary material for: From mixed group 13 cations [M(AlCp*)3]+ (M = Ga/In/Tl) to an Al4+ cluster
Source: Royal Society of Chemistry journal article supplement (doi:10.1039/d2sc04637g), 2022-01-01
Supplement: d2sc04637g1.pdf [file d2sc04637g1.pdf]

Supporting information for the article: **From mixed group 13 cations  $[M(\text{AlCp}^*)_3]^+$  ( $M = \text{Ga/In/Tl}$ ) to a novel  $\text{Al}_4^+$  cluster**

Philipp Dabringhaus, [Ingo Krossing](#)

## Contents

|     |                                                                                                                                                       |     |
|-----|-------------------------------------------------------------------------------------------------------------------------------------------------------|-----|
| S-1 | Supporting experimental data .....                                                                                                                    | 3   |
|     | General experimental details and analytical methods .....                                                                                             | 3   |
|     | Experimental data for $[\text{Ga}(\text{AlCp}^*)_3][\text{Al}(\text{OR}^{\text{F}})_4]$ <b>1</b> .....                                                | 5   |
|     | Experimental data for $[\text{In}(\text{AlCp}^*)_3][\text{Al}(\text{OR}^{\text{F}})_4]$ <b>2</b> .....                                                | 12  |
|     | Experimental data for $[\text{Ti}(\text{AlCp}^*)_3][\text{Al}(\text{OR}^{\text{F}})_4]$ <b>3</b> .....                                                | 18  |
|     | Experimental data for $[\text{Ga}(\text{Me}_3\text{TACN})][\text{Al}(\text{OR}^{\text{F}})_4]$ <b>7</b> .....                                         | 26  |
|     | Experimental data for $[\text{Ti}(\text{Me}_3\text{TACN})][\text{Al}(\text{OR}^{\text{F}})_4]$ <b>8</b> .....                                         | 29  |
|     | Experimental data for $[(\text{Me}_3\text{TACN})\text{Al}(\text{AlCp}^*)_3][\text{Al}(\text{OR}^{\text{F}})_4]$ <b>4</b> .....                        | 32  |
| S-2 | Mechanistic studies on the reaction of $[\text{Ti}(\text{AlCp}^*)_3][\text{Al}(\text{OR}^{\text{F}})_4]$ <b>3</b> with $\text{Me}_3\text{TACN}$ ..... | 41  |
| S-3 | Mechanistic studies on the reaction of $[\text{Ga}(\text{AlCp}^*)_3][\text{Al}(\text{OR}^{\text{F}})_4]$ <b>1</b> with $\text{Me}_3\text{TACN}$ ..... | 46  |
| S-4 | Supporting quantum-chemical calculations .....                                                                                                        | 50  |
|     | Computational details .....                                                                                                                           | 50  |
|     | QTAIM analysis of the cations .....                                                                                                                   | 51  |
|     | EDA-NOCV of the clusters .....                                                                                                                        | 52  |
|     | QC analysis of $[\text{Ga}_2(\text{AlCp}^*)_6]$ .....                                                                                                 | 55  |
|     | Comparison of dimerization for <b>1<sup>+</sup></b> , <b>2<sup>+</sup></b> , and <b>3<sup>+</sup></b> .....                                           | 57  |
|     | Frontier orbitals .....                                                                                                                               | 58  |
|     | Energies .....                                                                                                                                        | 59  |
|     | Optimized structures .....                                                                                                                            | 60  |
| S-5 | Overview on crystal data .....                                                                                                                        | 148 |
| S-6 | References .....                                                                                                                                      | 337 |

## S-1 Supporting experimental data

### General experimental details and analytical methods

All manipulations of air and/or water sensitive compounds were performed under an inert argon atmosphere using standard Schlenk or glovebox techniques. All glassware used in reactions have been stored over-night in an oven at 180°C and were thoroughly flame-dried prior to usage. Cp\*H (Sigma Aldrich), KHMDS (Sigma Aldrich, >95%) and Me<sub>3</sub>TACN (ChemPUR, 97 %) were used as received. Li[*pf*] ([*pf*]<sup>-</sup> = [Al(OR<sup>F</sup>)<sub>4</sub>]<sup>-</sup> with OR<sup>F</sup> = C(CF<sub>3</sub>)<sub>3</sub>),<sup>[1]</sup> Ga[*pf*],<sup>[2]</sup> In[*pf*],<sup>[3]</sup> Tl[*pf*]<sup>[4]</sup> and [(AlCp\*)<sub>4</sub>]<sup>[5]</sup> (Cp\* = C<sub>5</sub>Me<sub>5</sub>) prepared using literature known procedures. Fluorobenzene (fluorochem, PhF), *n*-heptane (Sigma Aldrich) and 1,2-difluorobenzene (fluorochem, 1,2-DFB) were refluxed over CaH<sub>2</sub>, fractionally distilled and stored over activated 3 Å molecular sieves. *n*-Pentane was collected from the solvent-purification system (SPS) and used as received.

**NMR spectroscopy:** NMR samples were prepared inside an inert atmosphere glovebox in NMR tubes equipped with a gas-tight J. Young valve. <sup>1</sup>H, <sup>7</sup>Li, <sup>13</sup>C, <sup>19</sup>F, <sup>27</sup>Al and <sup>31</sup>P-NMR spectra were acquired either on a Bruker Biospin Avance II+ 400 MHz WB or a Bruker Avance III HD 300 MHz spectrometer. <sup>1</sup>H and <sup>13</sup>C NMR spectra are reported relative to TMS and were calibrated to residual solvent resonances.<sup>[4]</sup> Data analysis was performed using Bruker TOPSPIN 3.5 software. The broad resonance at δ = 70 ppm observed in <sup>27</sup>Al-NMR spectra corresponds to a background from Al-nuclei in the probe head. The graphical representations in the manuscript were created with OriginPro 2021.

### IR and Raman spectroscopy:

FTIR spectra were recorded inside a glovebox with a Bruker ALPHA equipped with QuickSnap Eco-ATR module and ZnSe crystal. The spectra were measured at RT in the range of 4000-550 cm<sup>-1</sup> with 64 scans and a resolution of 2 cm<sup>-1</sup>. The data were processed with the Bruker OPUS 7.5 software package and, if not stated otherwise, a baseline correction with 3 iterations was performed. FT Raman spectra were recorded with a VERTEX 70 with Bruker RAM II Modul (1064 nm exciting line of a Nd-YAG laser) and liquid nitrogen cooled Ge detector. The samples were flame-sealed in soda-lime glass Pasteur pipettes and were measured at RT in the range of 4000-80 cm<sup>-1</sup> with up to 10,000 scans and a resolution of 4 cm<sup>-1</sup>. The data were processed with the Bruker OPUS 7.5 software package and, if not stated otherwise, a baseline correction with 5 iterations was performed. All IR and Raman spectra were normalized to 1 and the intensities are reported as follows: ≥ 0.8 = very strong (vs), ≥ 0.6 = strong (s), ≥ 0.4 = medium (m), ≥ 0.2 = weak (w), < 0.2 = very weak (vw). The graphical representations were created with OriginPro 2021.

**UV/VIS spectroscopy:** Solution UV/VIS spectra were recorded on a Varian Cary 50 UV-Vis spectrophotometer in quartz cuvettes (thickness 1 mm) in oDFB solution. The graphical representations in the manuscript were created with OriginPro 2021.

**Single crystal X-ray analysis:** Single crystal X-ray diffraction. Single crystal X-ray diffraction data were collected using either on a Bruker SMART APEXII QUAZAR detector with fixed-Chi D8 Goniometer, INCOATEC Mo microsource or Bruker D8 VENTURE with PHOTONIII detector, fixed-Chi D8 Goniometer and INCOATEC Mo/Cu microsource. Crystals were selected under perfluoropolyether oil, mounted on 0.1 to 0.3 mm diameter CryoLoops and quench-cooled using an Oxford Cryostream 800 open flow N<sub>2</sub> cooling device.<sup>[6]</sup> Data were collected at 100 K using monochromated Mo K $\alpha$  radiation ( $\lambda = 0.71073 \text{ \AA}$ ). Data processing was done with SHELXS/XL and refined by least squares on weighted F<sup>2</sup> values for all reflections, disordering of fragments was done with the help of the implemented DSR tool.<sup>[7]</sup> Graphical representations have been prepared using Olex2-1.2. Finalisation of gathered data was done using final cif tool.<sup>[8]</sup>

## Experimental data for [Ga(AlCp\*)<sub>3</sub>][Al(OR<sup>F</sup>)<sub>4</sub>] **1**

### Procedure 1: Synthesis of **1** in 1,2-difluorobenzene (1,2-DFB)

[Ga(PhF)<sub>2-3</sub>][Al(OR<sup>F</sup>)<sub>4</sub>] (50 mg, 41 μmol) and [(AlCp\*)<sub>4</sub>] (20 mg, 31 μmol, 0.75 equiv.) were weighed into a Schlenk tube and 1,2-difluorobenzene (1 mL) was added at -40°C. The orange solution was stirred for 5 min, layered with *n*-heptane and allowed to crystallize at -31°C. The title compound (48 mg, 32 μmol, 75 %) was isolated as orange crystals.

**<sup>1</sup>H NMR spectrum (300.18 MHz, PhF, 298 K):** δ = 1.70 (s, 45 H, [Ga(AlCp\*)<sub>3</sub>]<sup>+</sup>) ppm.

**<sup>1</sup>H, <sup>13</sup>C HMBC spectrum (300.18 MHz, 75.48 MHz, PhF, 298 K):** δ(<sup>13</sup>C) = 8.9 (-CH<sub>3</sub>), 115.6 (C<sub>5</sub>Me<sub>5</sub>) ppm.

**<sup>19</sup>F NMR spectrum (282.45 MHz, PhF, 298 K):** δ = -75.1 (s, 36 F, [Al(OC<sub>4</sub>F<sub>9</sub>)<sub>4</sub>]<sup>-</sup>) ppm.

**<sup>27</sup>Al NMR spectrum (78.22 MHz, PhF, 298 K):** δ = 35.0 (s, [Al(OC<sub>4</sub>F<sub>9</sub>)<sub>4</sub>]<sup>-</sup>), -43.3 (s, [Ga(AlCp\*)<sub>3</sub>]<sup>+</sup>), -114.0 (br. s, [AlCp\*<sub>2</sub>]<sup>+</sup>) ppm.

**<sup>71</sup>Ga NMR spectrum (91.54 MHz, 1,2-DFB, 298 K):** No signals observed.

**FTIR spectrum (ZnSe-ATR):**  $\tilde{\nu}$  = 2932 (vw), 1451 (vw), 1418 (vw), 1388 (vw), 1352 (vw), 1298 (w), 1275 (s), 1241 (s), 1212 (vs), 1162 (m), 971 (vs), 830 (vw), 808 (vw), 798 (vw), 755 (vw), 726 (vs), 584 (vw), 570 (vw), 559 (vw) cm<sup>-1</sup>.

**Raman (25 mW, 5000 scans):**  $\tilde{\nu}$  = 2928 (w), 2757 (vw), 1419 (vw), 1394 (vw), 797 (vw), 746 (vw), 591 (vw), 552 (vw), 519 (vw), 471 (w), 398 (vw), 150 (vs), 81 (s), 322 (vw), 287 (vw), 1471 (vw) cm<sup>-1</sup>.

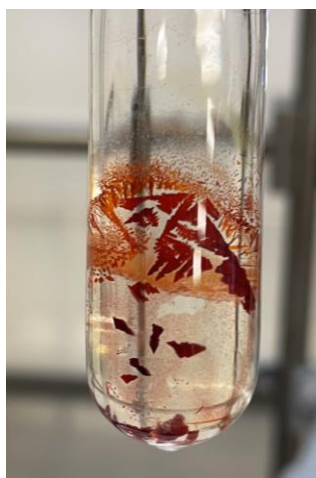

**S-Figure 1:** Crystals of **1** isolated at low-temperatures via crystallization from 1,2-DFB/*n*-heptane.

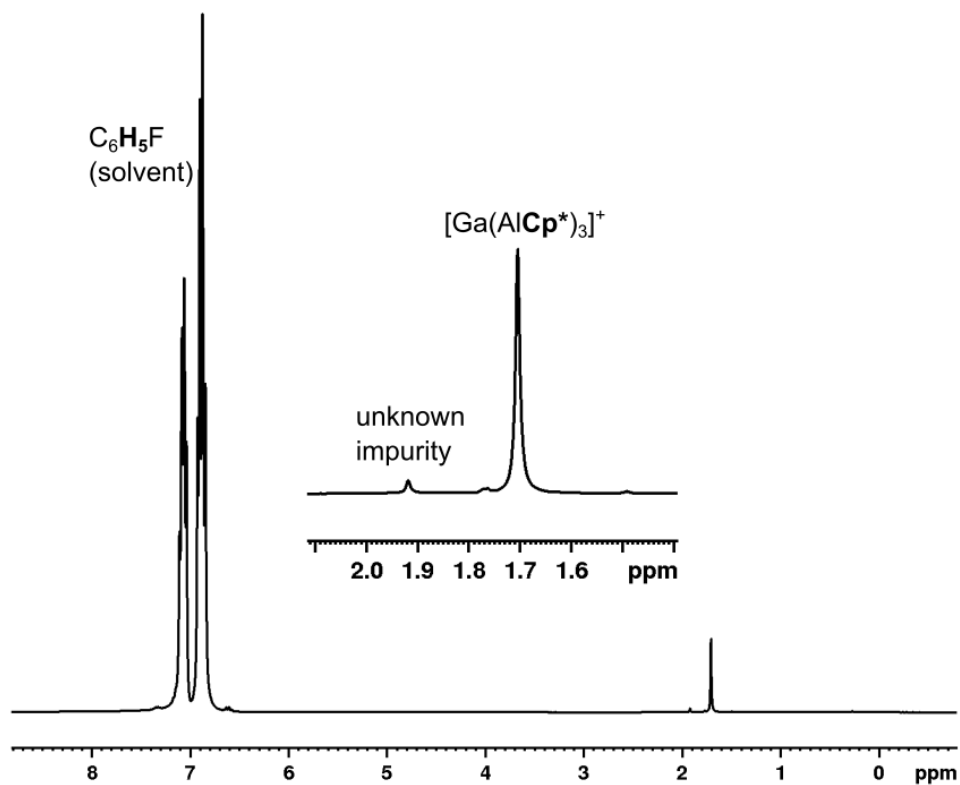

**S-Figure 2:**  $^1H$  NMR spectrum (300.18 MHz, PhF, 300K) of  $[Ga(AlCp^*)_3][Al(OR^F)_4]$  **1**.

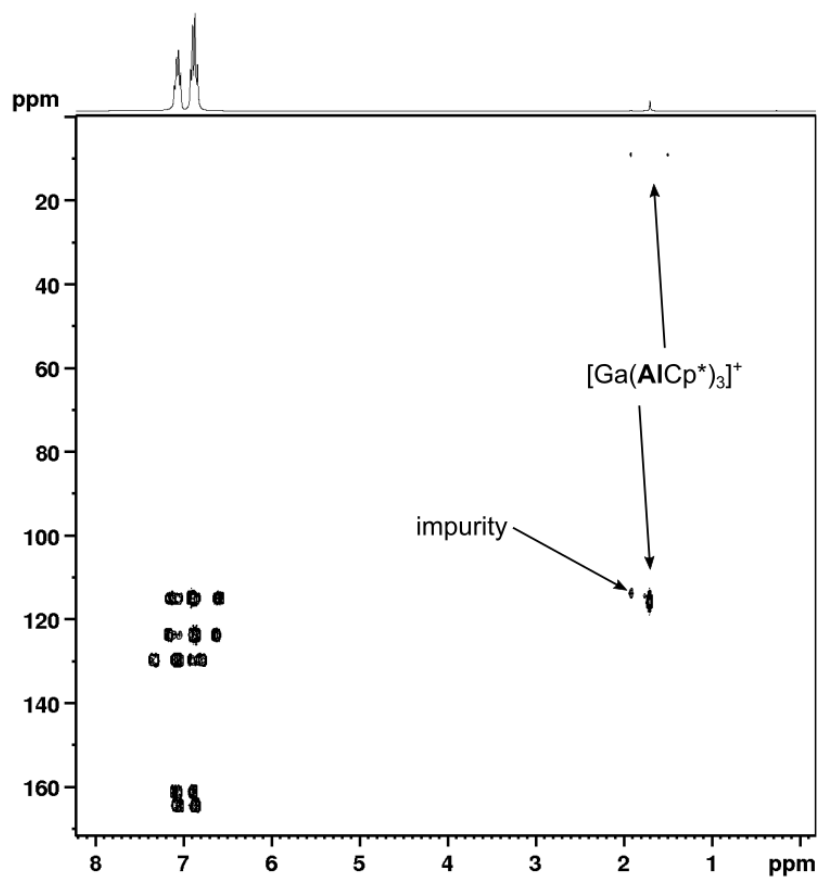

**S-Figure 3:**  $^1H$ - $^{13}C$  HMBC spectrum (300.18 MHz, 75.48 MHz, PhF, 300K) of  $[Ga(AlCp^*)_3][Al(OR^F)_4]$  **1**.

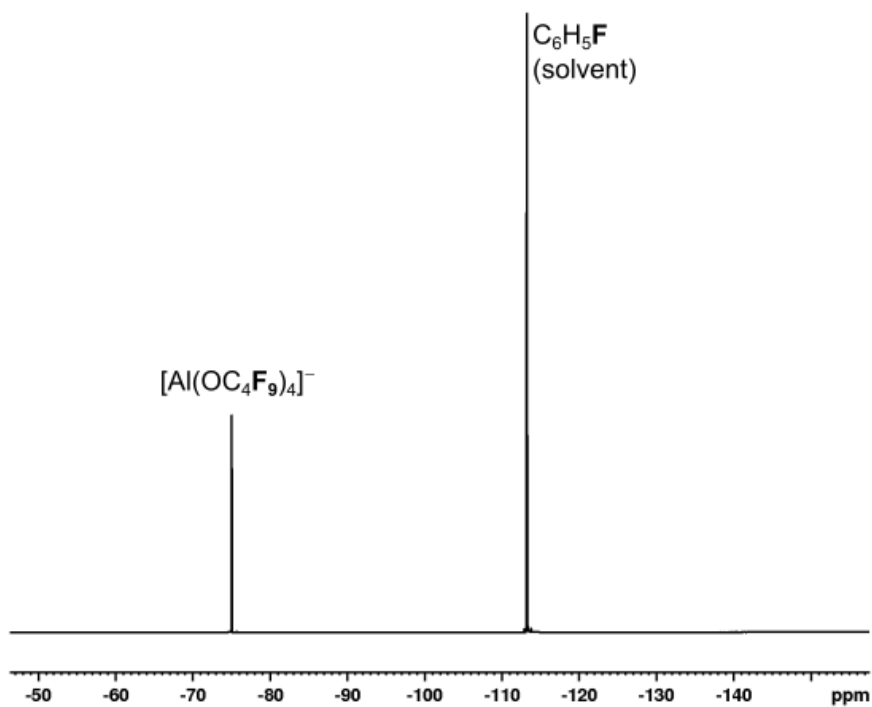

S-Figure 4:  $^{19}\text{F}$  NMR spectrum (282.5 MHz, PhF, 300K) of  $[\text{Ga}(\text{AlCp}^*)_3][\text{Al}(\text{OR}^{\text{F}})_4]$  **1**.

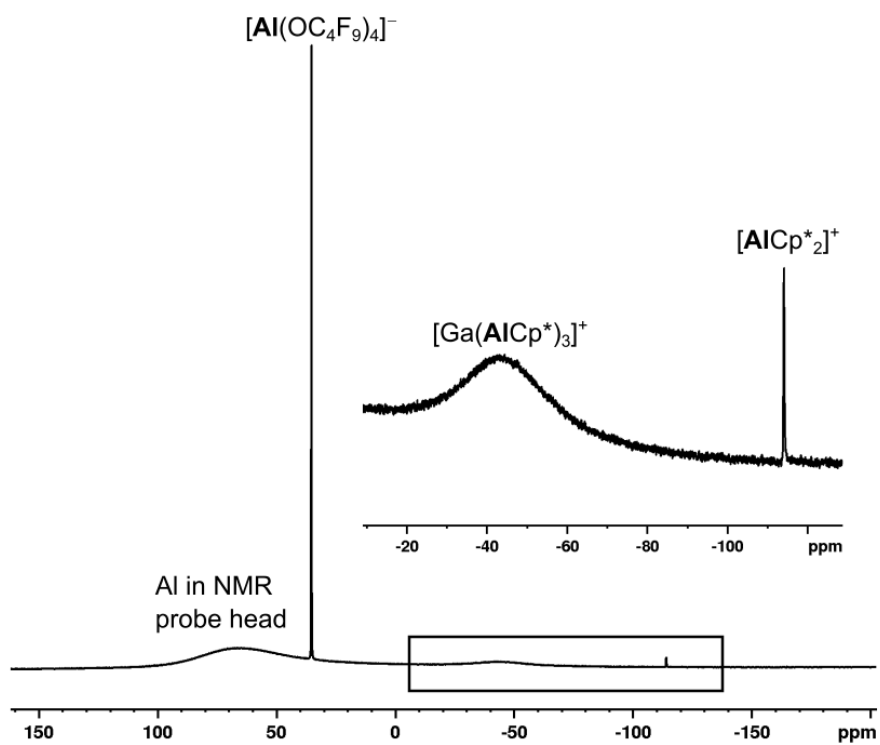

S-Figure 5:  $^{27}\text{Al}$  NMR spectrum (78.2 MHz, PhF, 300K) of  $[\text{Ga}(\text{AlCp}^*)_3][\text{Al}(\text{OR}^{\text{F}})_4]$  **1**.

## IR spectrum of 1

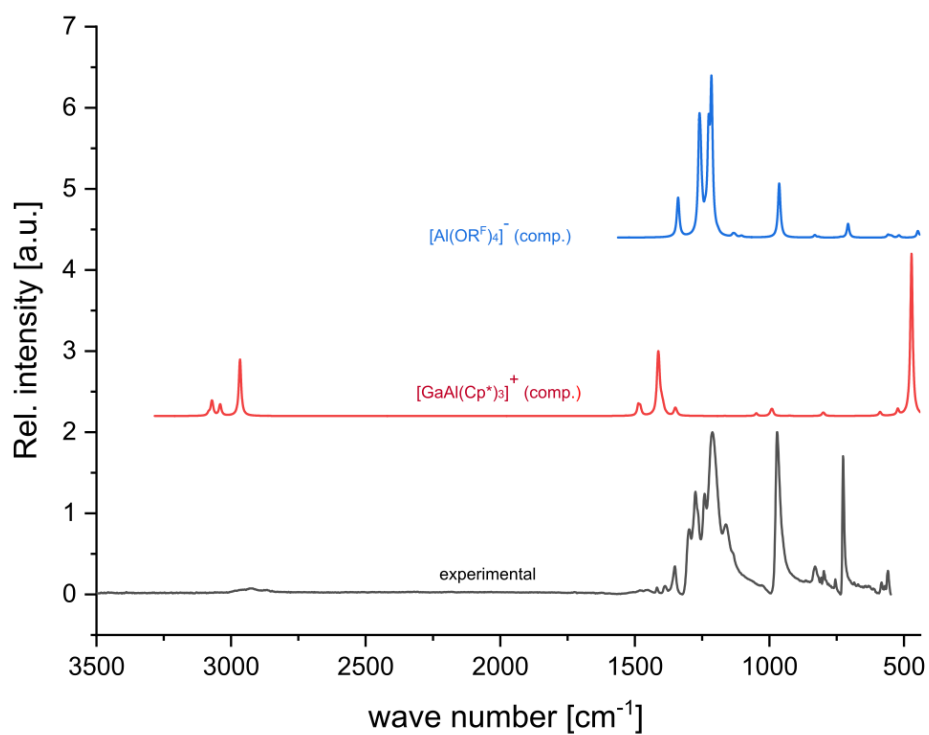

S-Figure 6: Experimental IR spectrum of **1** and computed IR spectra for the  $[\text{Ga}(\text{AlCp}^*)_3]^+$  cation and the  $[\text{Al}(\text{OR}^{\text{F}})_4]^-$  anion (bp86-d3bj/def2-svp).



## Raman spectrum of 1

In the Raman spectrum of  $[\text{Ga}(\text{AlCp}^*)_3]^+[\text{Al}(\text{OR}^F)_4]^-$  (S-Figure 7), two degenerate asymmetric stretching vibrations of the In–Al bonds are observed at  $471 \text{ cm}^{-1}$ . Moreover, the band at  $519 \text{ cm}^{-1}$  can be assigned to a symmetric stretching vibration. The molecular vibrations were calculated on bp86-d3bj/def2-svp-level of DFT and are visualized in S-Figure 8. Prominent signals near  $2900 \text{ cm}^{-1}$  can be assigned to C–H stretching vibrations ( $\nu(\text{C–H})$ ). Raman bands near  $1400 \text{ cm}^{-1}$  and  $600 \text{ cm}^{-1}$  are attributable to breathing vibrations of the  $\text{C}_5\text{Me}_5$  ligands as well as deformational modes of the  $\text{CH}_3$  groups.<sup>[9,10]</sup>

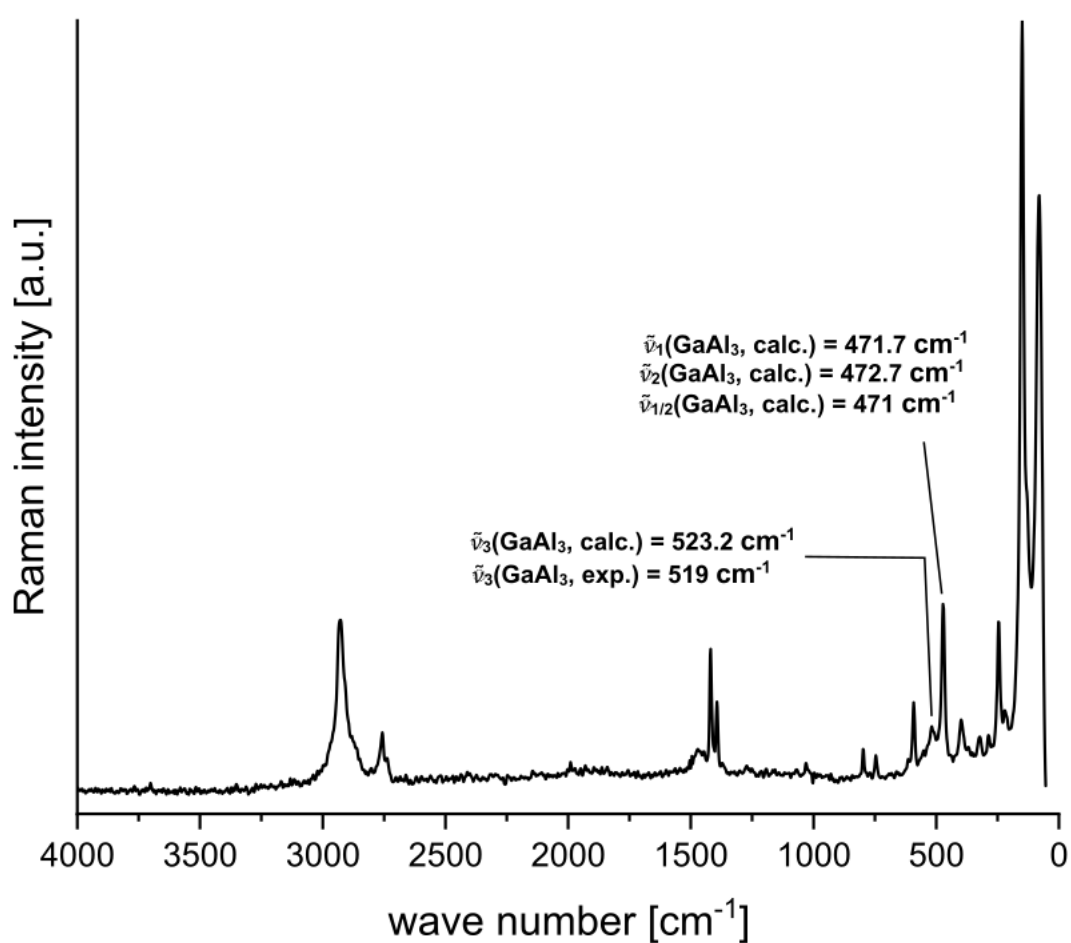

S-Figure 7: Experimental Raman spectrum of 1.

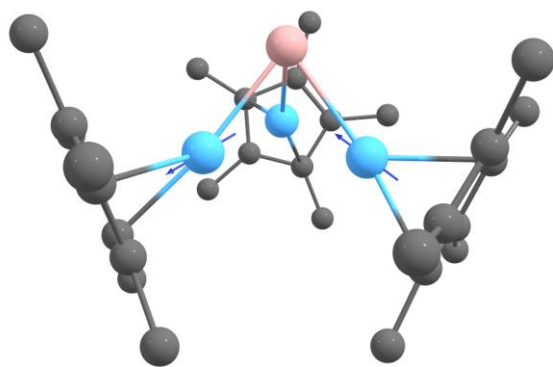

(Threshold for visualization: 0.31)

$$\tilde{\nu}_1(\text{GaAl}_3, \text{calc.}) = 471.7 \text{ cm}^{-1}$$

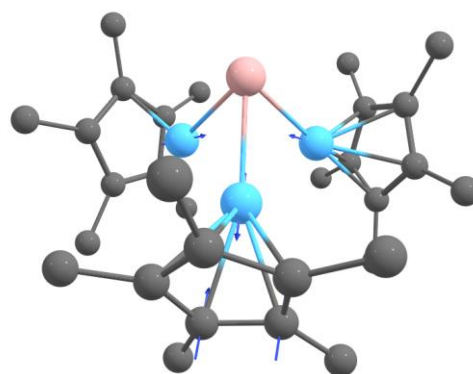

(Threshold for visualization: 0.18)

$$\tilde{\nu}_2(\text{GaAl}_3, \text{calc.}) = 472.7 \text{ cm}^{-1}$$

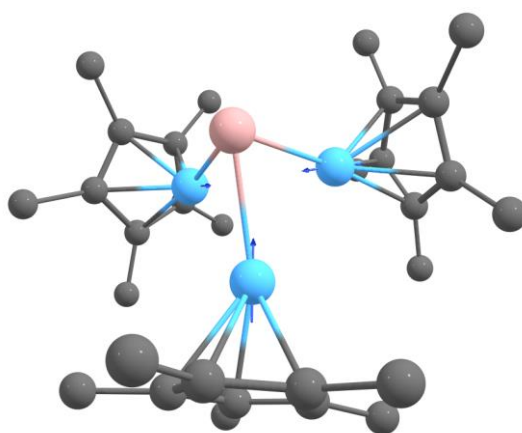

(Threshold for visualization: 0.18)

$$\tilde{\nu}_3(\text{GaAl}_3, \text{calc.}) = 523.3 \text{ cm}^{-1}$$

S-Figure 8: Computed breathing vibrations of the  $\text{GaAl}_3^+$  unit (at bp86-d3bj/def2-svp level of DFT). The displacement vectors computed for the vibration are displayed as blue arrows.

**Procedure 2:** Synthesis of **1** in fluorobenzene (PhF)

[Ga(PhF)<sub>2-3</sub>][Al(OR<sup>F</sup>)<sub>4</sub>] (150 mg, 122 μmol) and [(AlCp\*)<sub>4</sub>] (60 mg, 92 μmol, 0.75 equiv.) were dissolved in PhF (3 mL). The yellow solution was stirred for 5 min and layered with *n*-pentane room temperature. The title compound (144 mg, 94.5 μmol, 77 %) was isolated as orange crystals.

Detected NMR signals correspond to the previously observed NMR signals.

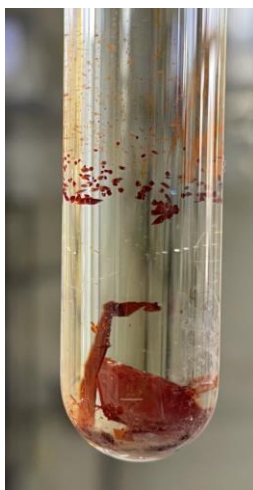

S-Figure 9: Crystals of **1** isolated via crystallization from PhF/*n*-pentane at room temperature.

## Experimental data for $[\text{In}(\text{AlCp}^*)_3][\text{Al}(\text{OR}^{\text{F}})_4]$ **2**

**Procedure:** Synthesis of **2** in 1,2-difluorobenzene (1,2-DFB)

$[\text{In}(\text{PhF})_{2-3}][\text{Al}(\text{OR}^{\text{F}})_4]$  (47 mg, 37  $\mu\text{mol}$ ) and  $[(\text{AlCp}^*)_4]$  (20 mg, 31  $\mu\text{mol}$ , 0.75 equiv.) were weighed into a Schlenk tube and 1,2-difluorobenzene (1 mL) was added at  $-30^\circ\text{C}$ . The brown solution was stirred for 30 min, layered with *n*-heptane and allowed to crystallize at  $-31^\circ\text{C}$ . The title compound (43 mg, 32  $\mu\text{mol}$ , 66 %) was isolated as yellow crystals and could be separated from the black, metallic precipitate formed at the bottom of the Schlenk tube.

**$^1\text{H}$  NMR spectrum (300.18 MHz, 1,2-DFB, 298 K):**  $\delta = 1.81$  (s, 45 H,  $[\text{In}(\text{AlCp}^*)_3]^+$ ), 1.97 (s, 30 H,  $[\text{Al}(\text{Cp}^*)_2]^+$ , minor impurity) ppm.

**$^1\text{H}$ ,  $^{13}\text{C}$  HMBC spectrum (300.18 MHz, 75.48 MHz, 1,2-DFB, 298 K):**  $\delta(^{13}\text{C}) = 8.7$  ( $-\text{CH}_3$ ), 115.6 ( $\text{C}_5\text{Me}_5$ ) ppm.

**$^{19}\text{F}$  NMR spectrum (282.45 MHz, 1,2-DFB, 298 K):**  $\delta = -75.0$  (s, 36 F,  $[\text{Al}(\text{OC}_4\text{F}_9)_4]^-$ ) ppm.

**$^{27}\text{Al}$  NMR spectrum (78.22 MHz, PhF, 298 K):**  $\delta = 35.0$  (s,  $[\text{Al}(\text{OC}_4\text{F}_9)_4]^-$ ),  $-59.7$  (s,  $[\text{In}(\text{AlCp}^*)_3]^+$ ),  $-114.8$  (s,  $[\text{AlCp}^*_2]^+$ ) ppm.

**$^{115}\text{In}$  NMR spectrum (65.78 MHz, 1,2-DFB, 298 K):** No signals observed.

**FTIR spectrum (ZnSe-ATR):**  $\tilde{\nu} = 1391$  (vw), 1352 (vw), 1300 (w), 1276 (m), 1242 (s), 1219 (vs), 1164 (vw), 973 (vs), 831 (vw), 806 (vw), 798 (vw), 756 (vw), 728 (s), 583 (vw), 561 (vw)  $\text{cm}^{-1}$ .

**Raman (25 mW, 10000 scans):**  $\tilde{\nu} = 2928$  (w), 2758 (vw), 1504 (vw), 1420 (w), 1393 (w), 797 (vw), 592 (vw), 496 (vw), 460 (w), 401 (vw), 1029 (vw), 746 (vw), 554 (vw), 320 (vw), 286 (vw), 201 (vw), 225 (vw), 112 (vs), 81 (vs)  $\text{cm}^{-1}$ .

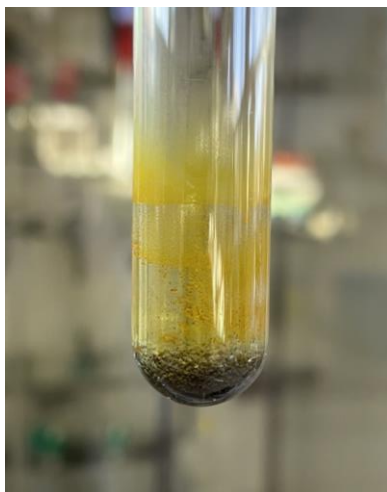

S-Figure 10: Crystals of **2** as well as formed Indium from the decomposition.

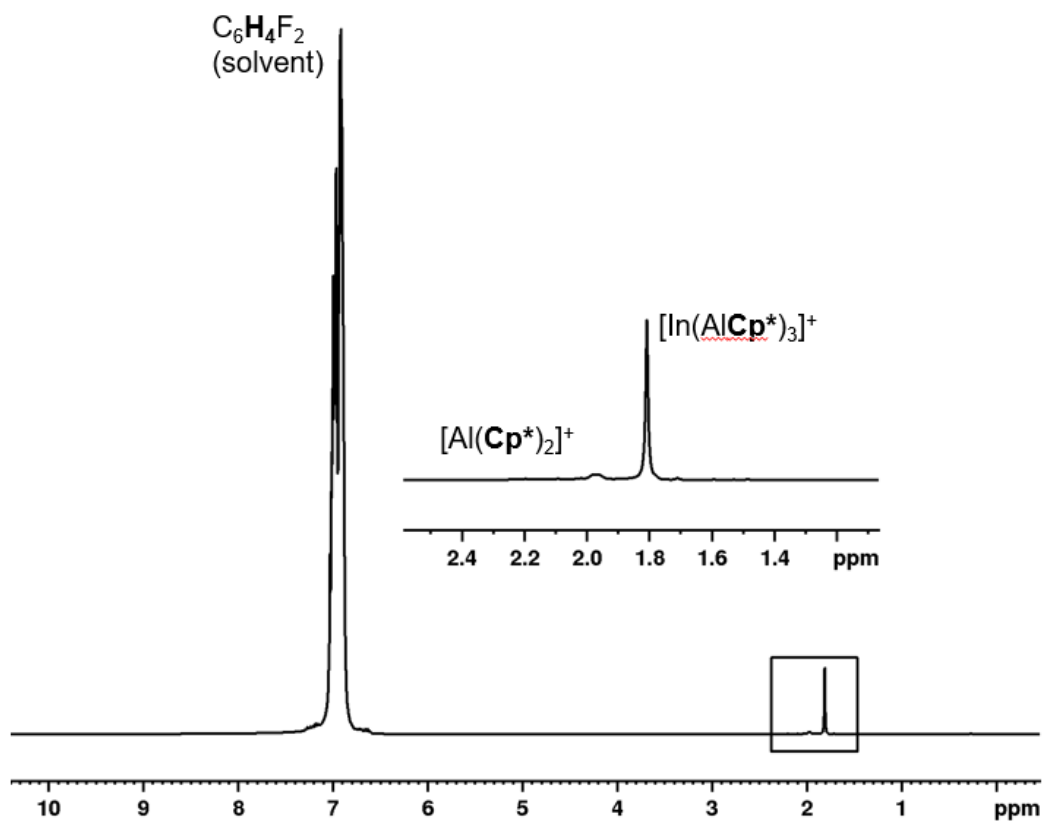

**S-Figure 11:**  $^1\text{H}$  NMR spectrum (300.18 MHz, 1,2-DFB, 300K) of  $[\text{In}(\text{AlCp}^*)_3][\text{Al}(\text{OR}^{\text{F}})_4]$  **2**.

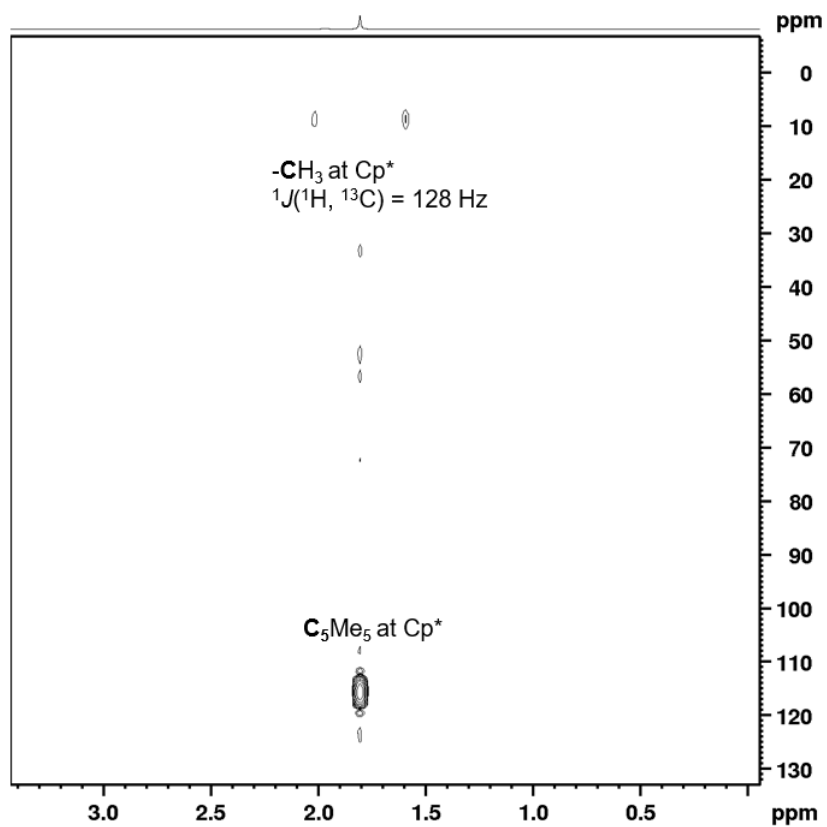

**S-Figure 12:**  $^1\text{H}$ - $^{13}\text{C}$  HMBC spectrum (300.18 MHz, 75.48 MHz, 1,2-DFB, 300K) of  $[\text{In}(\text{AlCp}^*)_3][\text{Al}(\text{OR}^{\text{F}})_4]$  **2**.

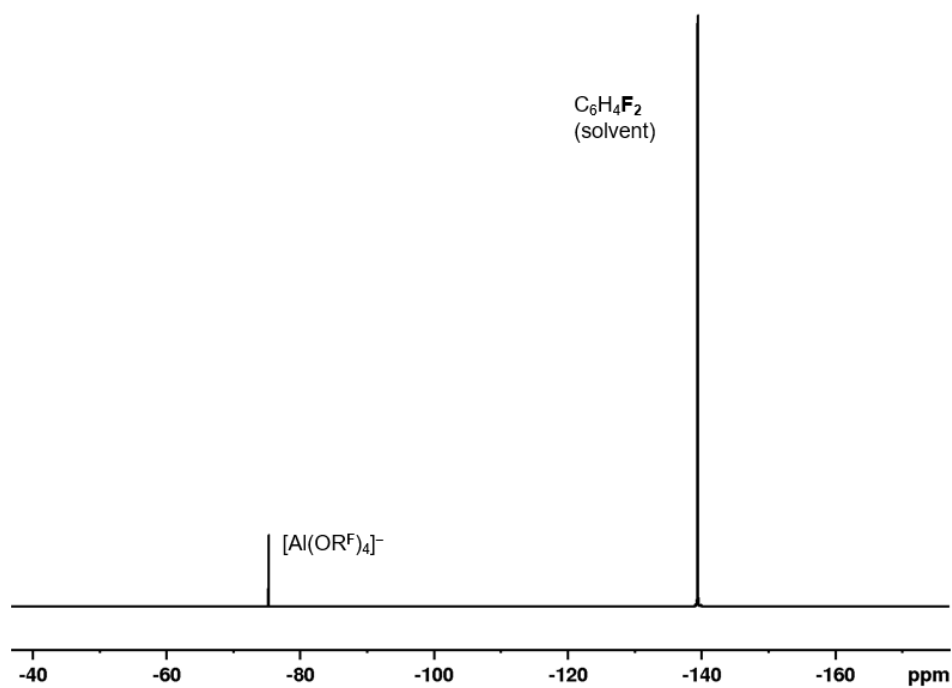

S-Figure 13:  $^{19}\text{F}$  NMR spectrum (282.5 MHz, 1,2-DFB, 300K) of  $[\text{In}(\text{AlCp}^*)_3][\text{Al}(\text{OR}^{\text{F}})_4]$  **2**.

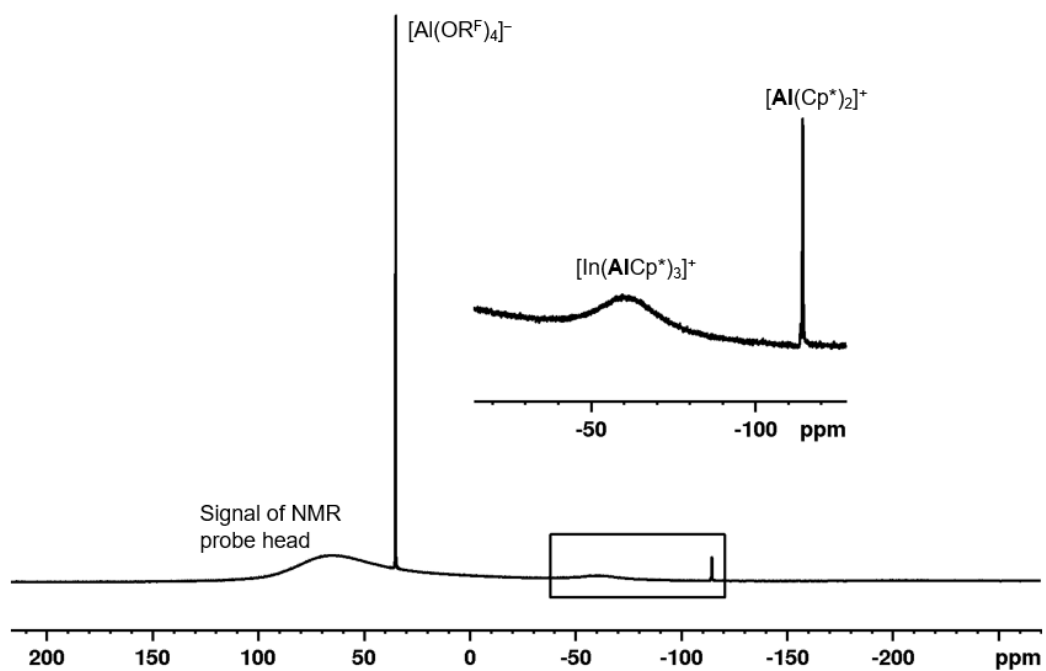

S-Figure 14:  $^{27}\text{Al}$  NMR spectrum (78.2 MHz, 1,2-DFB, 300K) of  $[\text{In}(\text{AlCp}^*)_3][\text{Al}(\text{OR}^{\text{F}})_4]$  **2**.

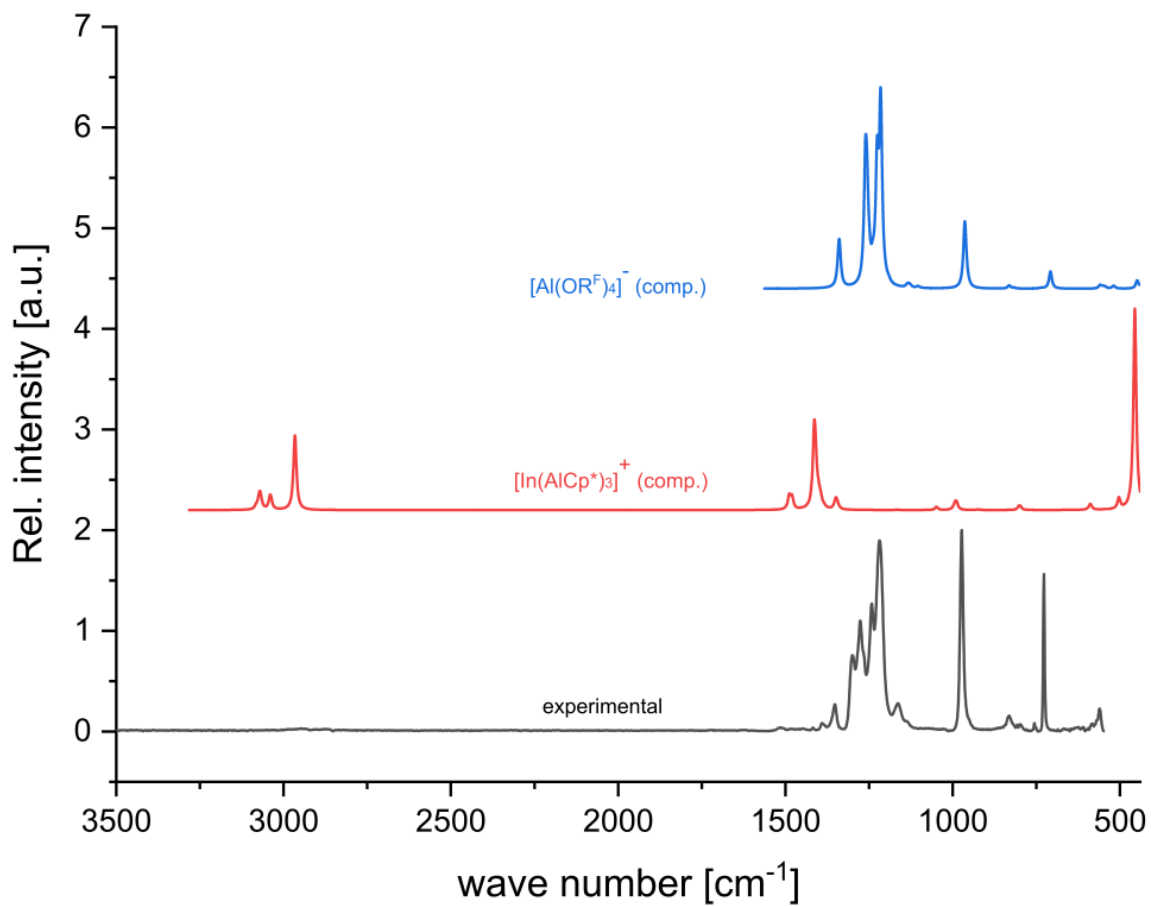

S-Figure 15: Experimental IR spectrum of **2** and computed IR spectra for the [In(AlCp<sup>\*</sup>)<sub>3</sub>]<sup>+</sup> cation and the [Al(OR<sup>F</sup>)<sub>4</sub>]<sup>-</sup> anion (bp86-d3bj/def2-svp).

## Raman spectrum of 2

In the Raman spectrum of  $[\text{In}(\text{AlCp}^*)_3]^+[\text{Al}(\text{OR}^F)_4]^-$  (S-Figure 16), two degenerate asymmetric stretching vibrations of the In–Al bonds are observed at  $460\text{ cm}^{-1}$ . Moreover, the band at  $496\text{ cm}^{-1}$  can be assigned to a symmetric stretching vibration. The molecular vibrations were calculated on bp86-d3bj/def2-svp-level of DFT and are visualized in S-Figure 17. Prominent signals near  $2900\text{ cm}^{-1}$  can be assigned to C–H stretching vibrations ( $\nu(\text{C–H})$ ). Raman bands near  $1400\text{ cm}^{-1}$  and  $600\text{ cm}^{-1}$  are attributable to breathing vibrations of the  $\text{C}_5\text{Me}_5$  ligands as well as deformational modes of the  $\text{CH}_3$  groups.<sup>[9,10]</sup>

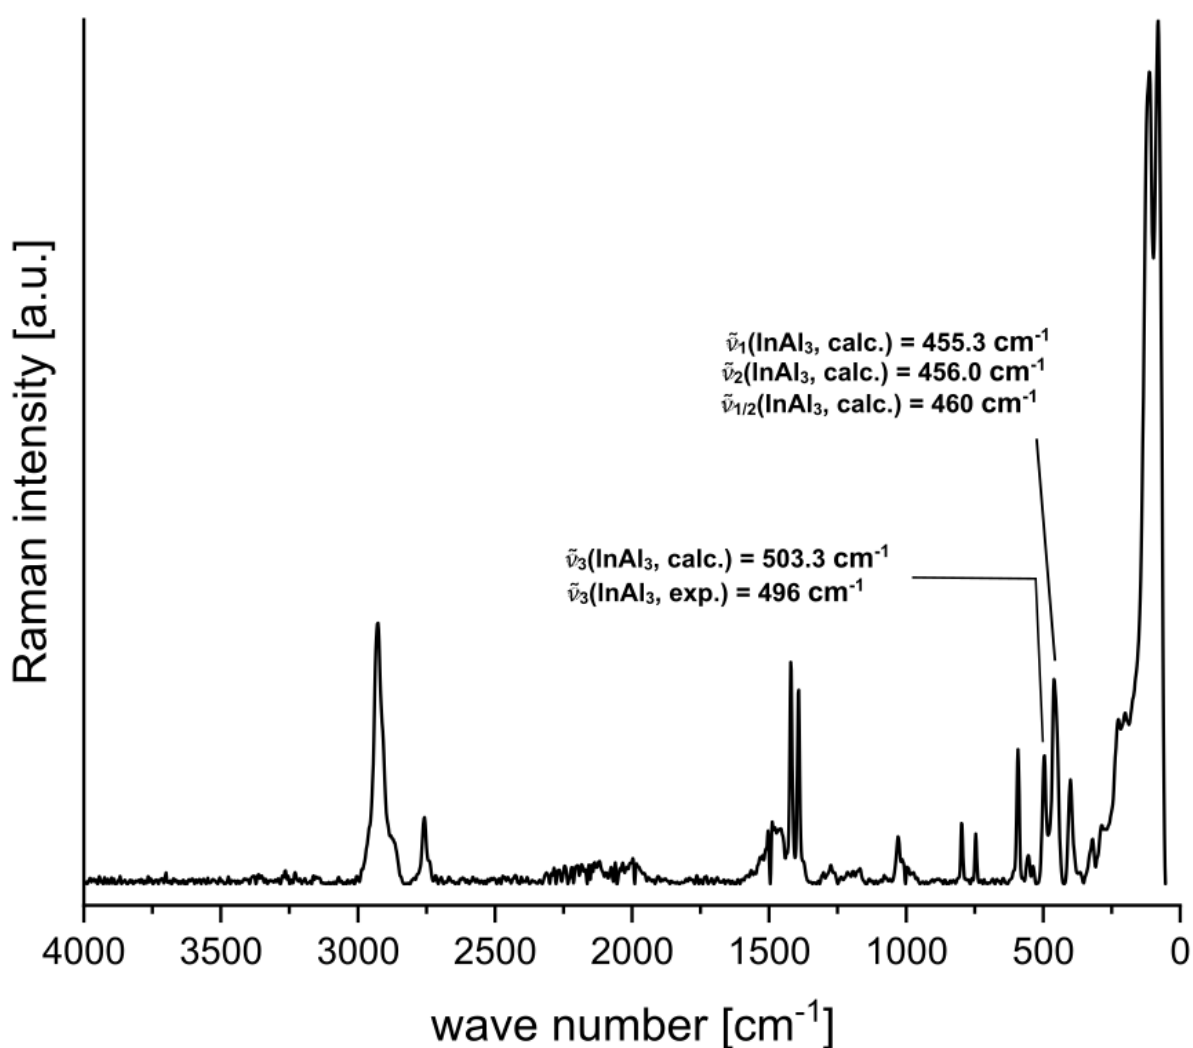

S-Figure 16: Experimental Raman spectrum of 2.



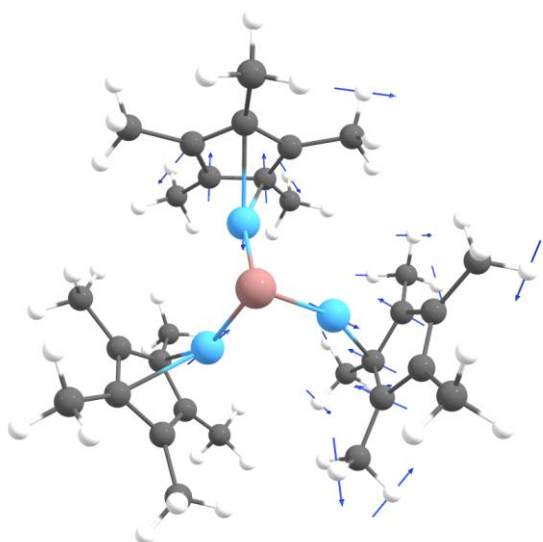

(Threshold for visualization: 0.12)

$$\tilde{\nu}_1(\text{InAl}_3, \text{calc.}) = 455.3 \text{ cm}^{-1}$$

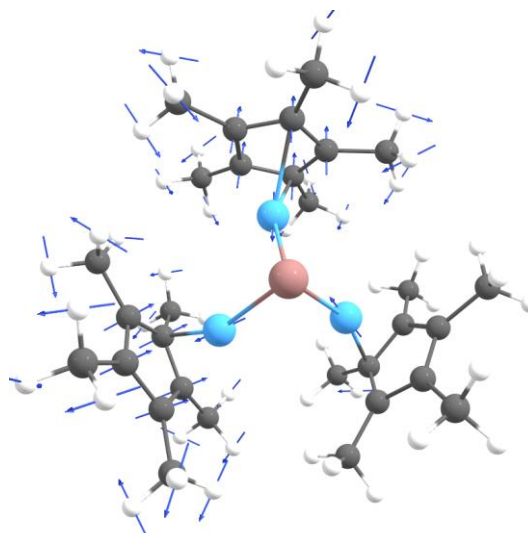

(Threshold for visualization: 0.05)

$$\tilde{\nu}_2(\text{InAl}_3, \text{calc.}) = 456.03 \text{ cm}^{-1}$$

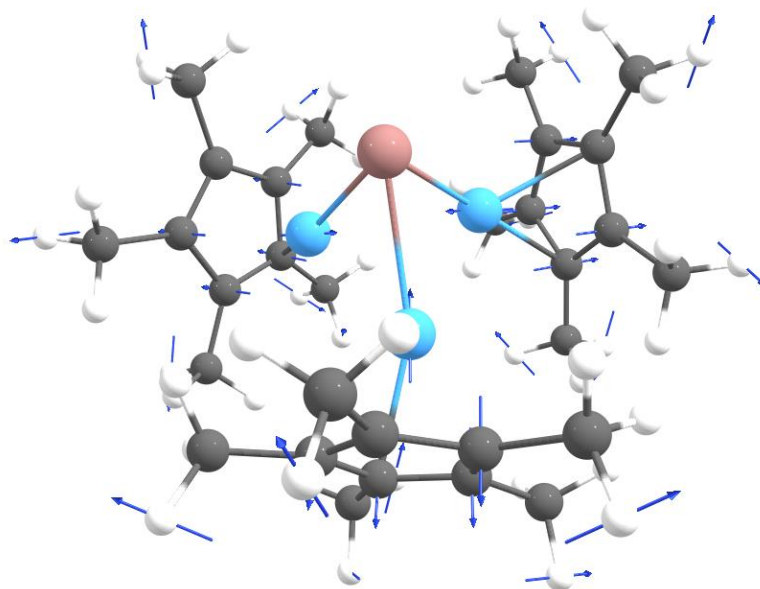

(Threshold for visualization: 0.18)

$$\tilde{\nu}_3(\text{InAl}_3, \text{calc.}) = 503.3 \text{ cm}^{-1}$$

S-Figure 17: Computed breathing vibrations of the  $\text{InAl}_3^+$  unit (at bp86-d3bj/def2-svp level of DFT). The displacement vectors computed for the vibration are displayed as blue arrows.

## Experimental data for $[\text{Ti}(\text{AlCp}^*)_3][\text{Al}(\text{OR}^{\text{F}})_4]$ **3**

### **Procedure:** Synthesis of $[\text{Ti}(\text{AlCp}^*)_3][\text{Al}(\text{OR}^{\text{F}})_4]$ **3**

$\text{Ti}[\text{Al}(\text{OR}^{\text{F}})_4]$  (50 mg, 43  $\mu\text{mol}$ ) and  $[(\text{AlCp}^*)_4]$  (21 mg, 33  $\mu\text{mol}$ , 0.75 equiv.) were weighed into a Schlenk tube and fluorobenzene (1.5 mL) was added. The yellow solution was stirred for 10 min at room temperature and canulated onto *n*-heptane (5 mL) forming a yellow precipitate. The title compound (50 mg, 30  $\mu\text{mol}$ , 71 %) was isolated as yellow powder.

**$^1\text{H}$  NMR spectrum (400.16 MHz, PhF, 298 K):**  $\delta = 1.70$  (s, 45 H,  $[\text{Ti}(\text{AlCp}^*)_3]^+$ ) ppm.

**$^1\text{H}$ ,  $^{13}\text{C}$  HMBC spectrum (400.16 MHz, 100.6 MHz, PhF, 298 K):**  $\delta(^{13}\text{C}) = 9.0$  (- $\text{CH}_3$ ), 115.7 ( $\text{C}_5\text{Me}_5$ ) ppm.

**$^{19}\text{F}$  NMR spectrum (376.54 MHz, PhF, 298 K):**  $\delta = -75.0$  (s, 36 F,  $[\text{Al}(\text{OC}_4\text{F}_9)_4]^-$ ) ppm.

**$^{27}\text{Al}$  NMR spectrum (78.22 MHz, PhF, 298 K):**  $\delta = 35.0$  (s,  $[\text{Al}(\text{OC}_4\text{F}_9)_4]^-$ ),  $-70.0$  (d,  $^1J(^{27}\text{Al}, ^{205}\text{Tl}) = 3577$  Hz,  $[\text{Ti}(\text{AlCp}^*)_3]^+$ ),  $-114.1$  (s,  $[\text{AlCp}^*_2]^+$ ) ppm.

**FTIR spectrum (ZnSe-ATR):**  $\tilde{\nu} = 1353$  (vw), 1299 (w), 1276 (m), 1242 (s), 1218 (vs), 1164 (vw), 973 (vs), 833 (vw), 799 (vw), 756 (vw), 728 (s), 561 (vw)  $\text{cm}^{-1}$ .

**Raman (25 mW, 10000 scans):**  $\tilde{\nu} = 2929$  (m), 2757 (w), 1496 (w), 1488 (vw), 1421 (w), 1393 (w), 1077 (vw), 1030 (vw), 1002 (vw), 797 (vw), 744 (vw), 592 (vw), 495 (w), 452 (w), 399 (w), 80 (vs), 98 (vs), 320 (vw), 211 (vw), 285 (vw)  $\text{cm}^{-1}$ .

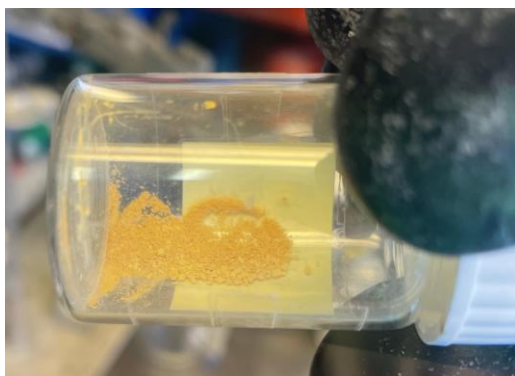

S-Figure 18: Picture of isolated yellow powder of **3**.

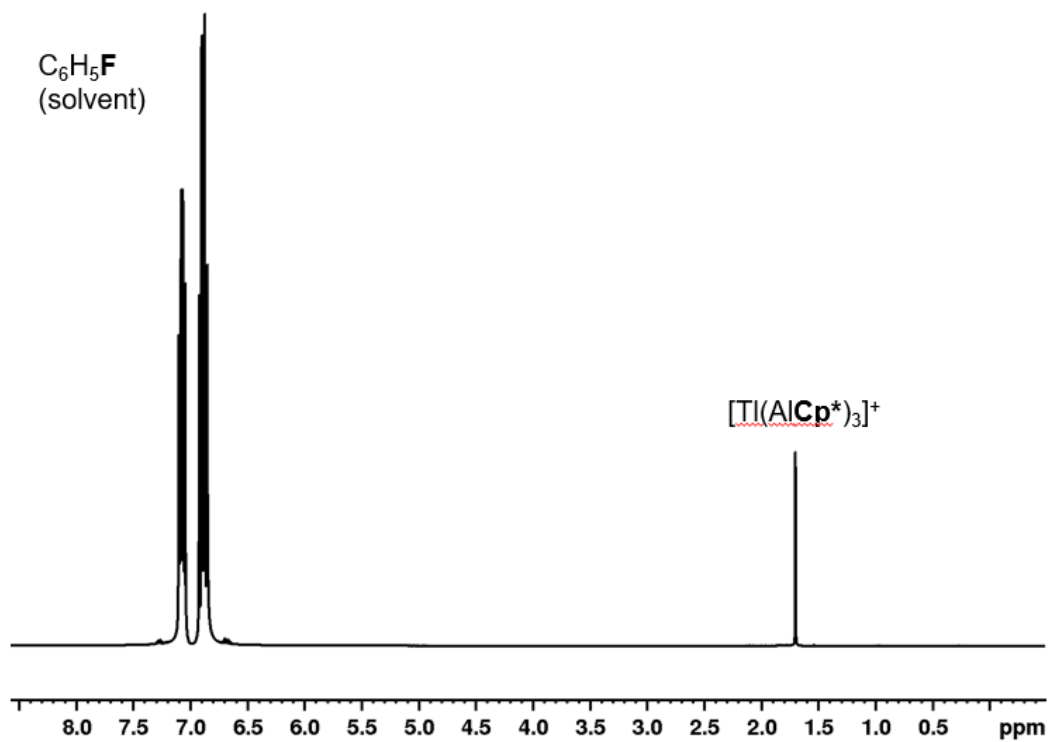

**S-Figure 19:**  $^1\text{H}$  NMR spectrum (400.20 MHz, PhF, 300K) of  $[\text{Ti}(\text{AlCp}^*)_3][\text{Al}(\text{OR}^{\text{F}})_4]$  **3**.

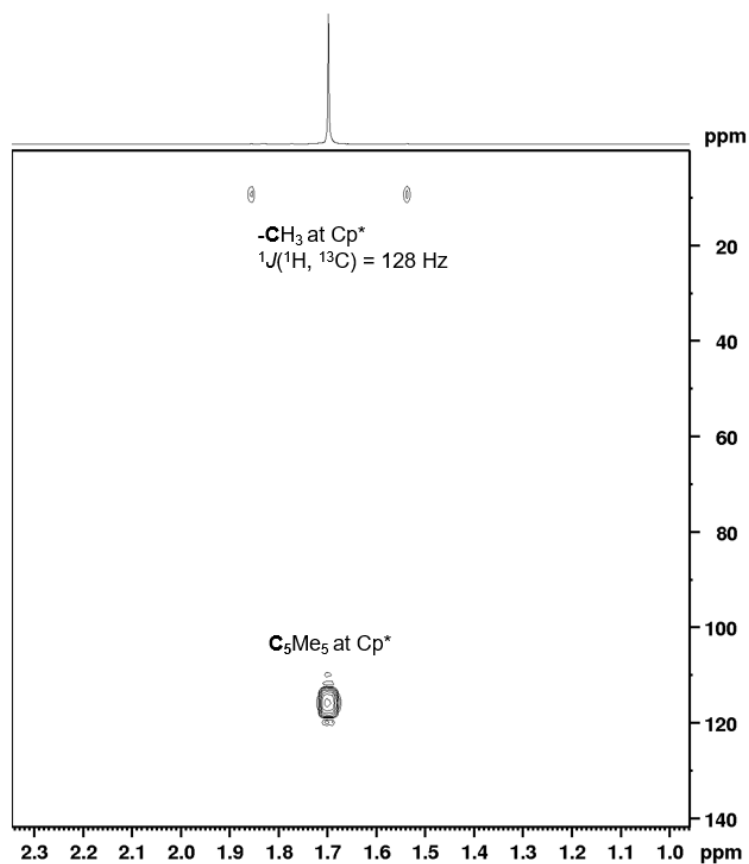

**S-Figure 20:**  $^1\text{H}$ - $^{13}\text{C}$  HMBC spectrum (400.20 MHz, 100.62 MHz, PhF, 300K) of  $[\text{Ti}(\text{AlCp}^*)_3][\text{Al}(\text{OR}^{\text{F}})_4]$  **3**.

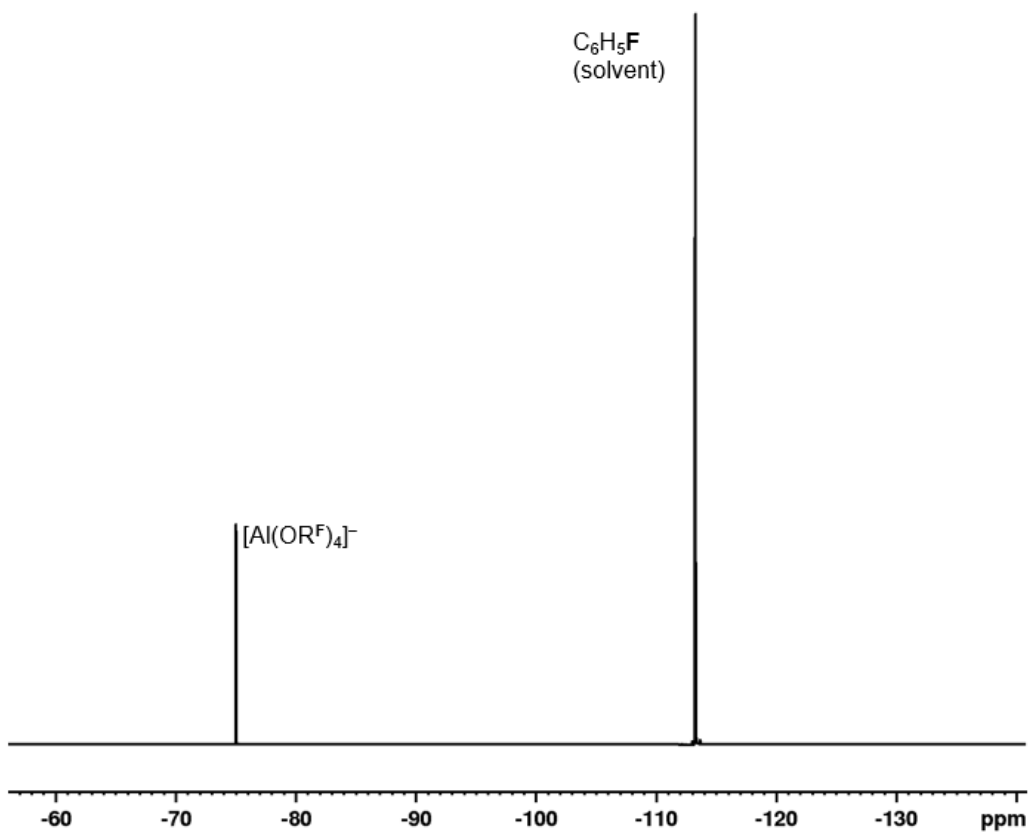

**S-Figure 21:**  $^{11}F$  NMR spectrum (376.5 MHz, PhF, 300K) of  $[Ti(AICp^*)_3][Al(OR^F)_4]$  **3**.

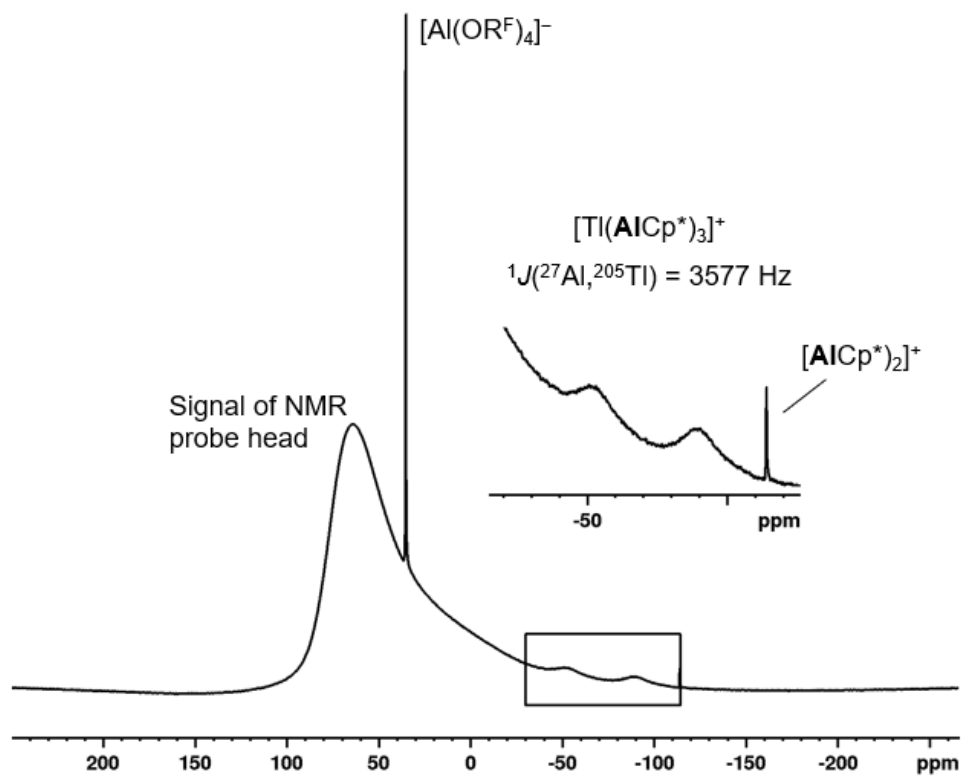

**S-Figure 22:**  $^{27}Al$  NMR spectrum (104.3 MHz, PhF, 300K) of  $[Ti(AICp^*)_3][Al(OR^F)_4]$  **3**.

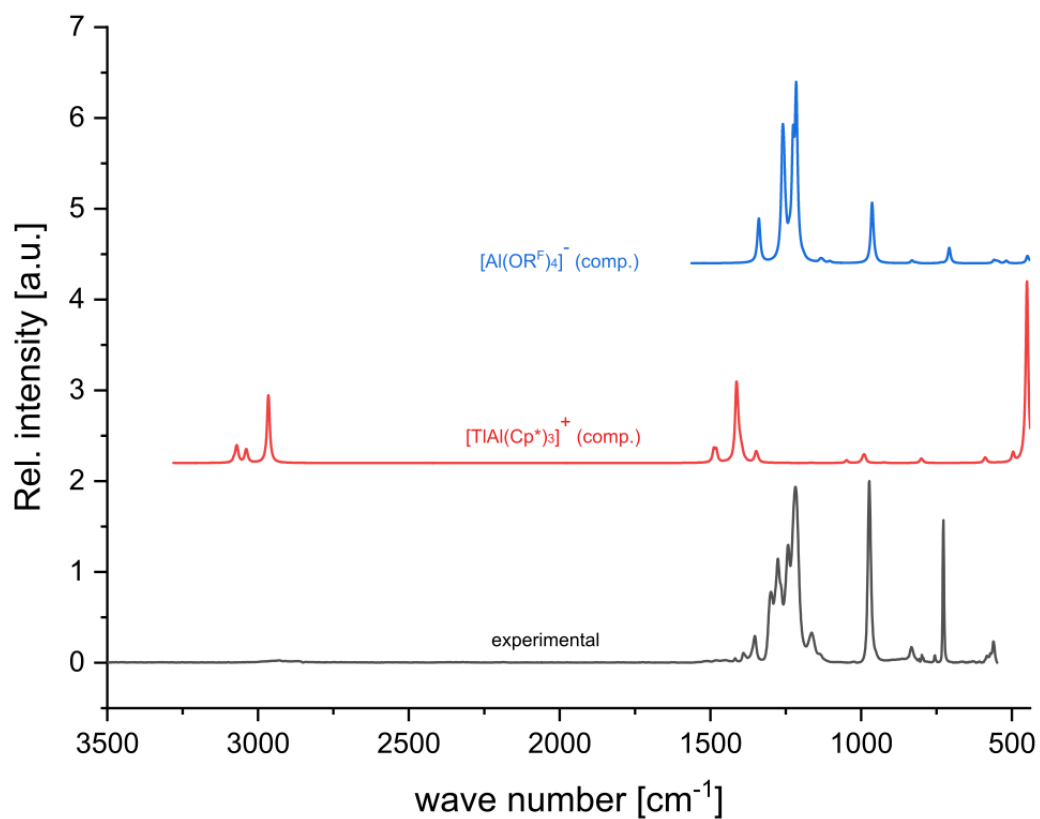

S-Figure 23: Experimental IR spectrum of **3** and computed IR spectra for the [Tl(AlCp\*)<sub>3</sub>]<sup>+</sup> cation and the [Al(OR<sup>F</sup>)<sub>4</sub>]<sup>-</sup> anion (bp86-d3bj/def2-svp).

### Raman spectrum of 3

In the Raman spectrum of  $[\text{Tl}(\text{AlCp}^*)_3]^+[\text{Al}(\text{OR}^{\text{F}})_4]^-$  (S-Figure 24), two degenerate asymmetric stretching vibrations of the In–Al bonds are observed at  $452\text{ cm}^{-1}$ . Moreover, the band at  $495\text{ cm}^{-1}$  can be assigned to a symmetric stretching vibration. The molecular vibrations were calculated on bp86-d3bj/def2-svp-level of DFT and are visualized in S-Figure 25. Prominent signals near  $2900\text{ cm}^{-1}$  can be assigned to C–H stretching vibrations ( $\nu(\text{C–H})$ ). Raman bands near  $1400\text{ cm}^{-1}$  and  $600\text{ cm}^{-1}$  are attributable to breathing vibrations of the  $\text{C}_5\text{Me}_5$  ligands as well as deformational modes of the  $\text{CH}_3$  groups.<sup>[9,10]</sup>

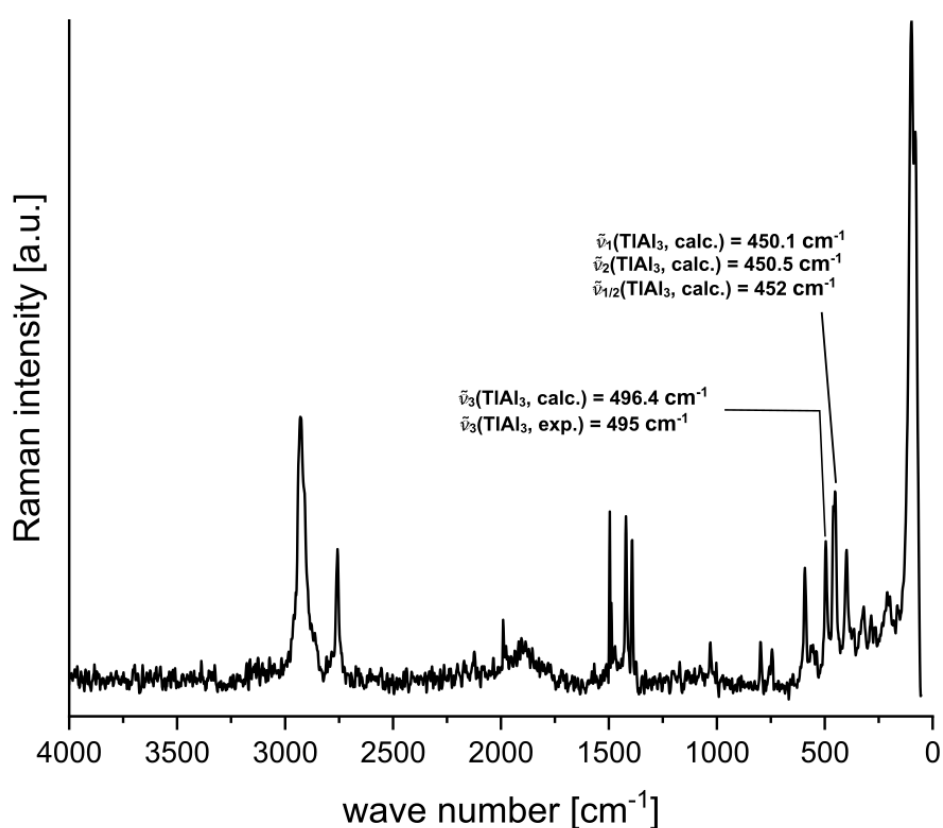

S-Figure 24: Experimental Raman spectrum of **3**.

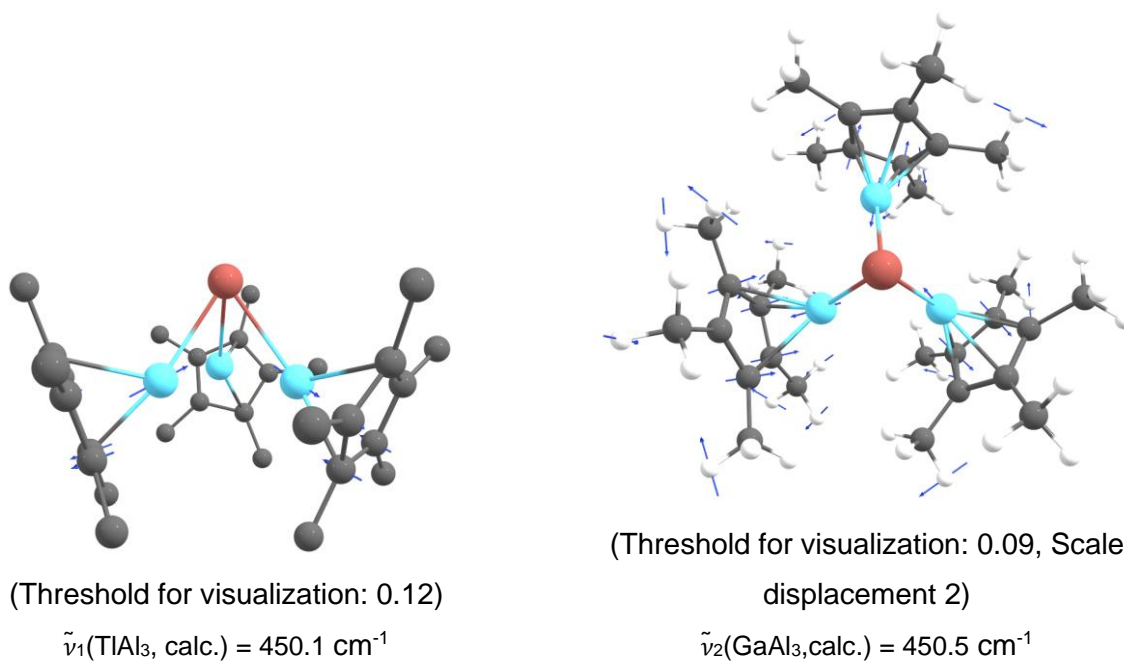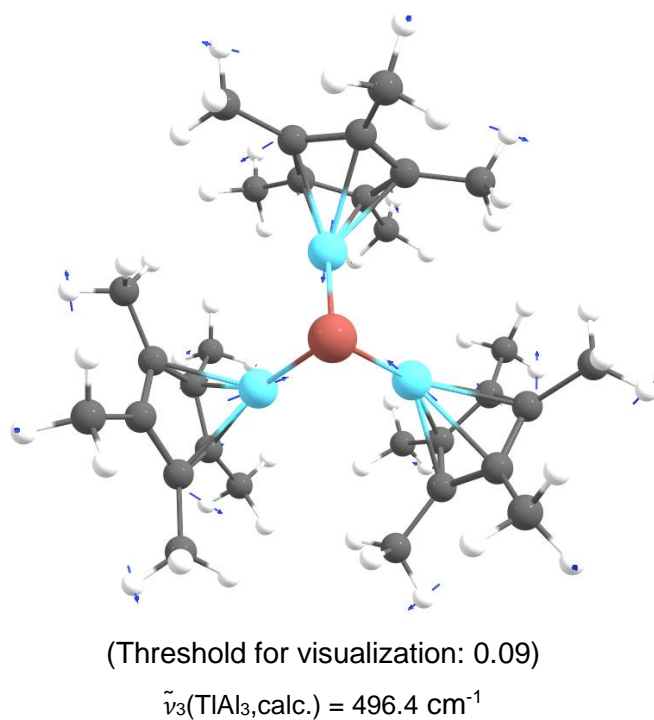

S-Figure 25: Computed breathing vibrations of the  $\text{TIAl}_3^+$  unit (at bp86-d3bj/def2-svp level of DFT). The displacement vectors computed for the vibration are displayed as blue arrows.

### Decomposition of 3 after 4 days at room temperature

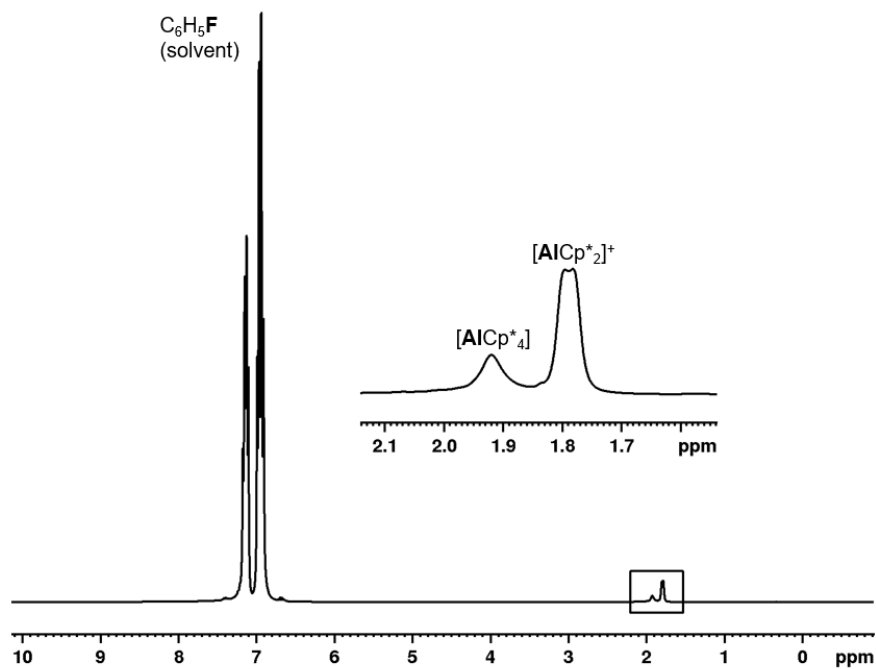

**S-Figure 26:**  $^1\text{H}$  NMR spectrum (300.02 MHz, PhF, 300K) of the decomposition of  $[\text{Ti}(\text{AlCp}^*)_3][\text{Al}(\text{OR}^{\text{F}})_4]$  **3** after 4 days.

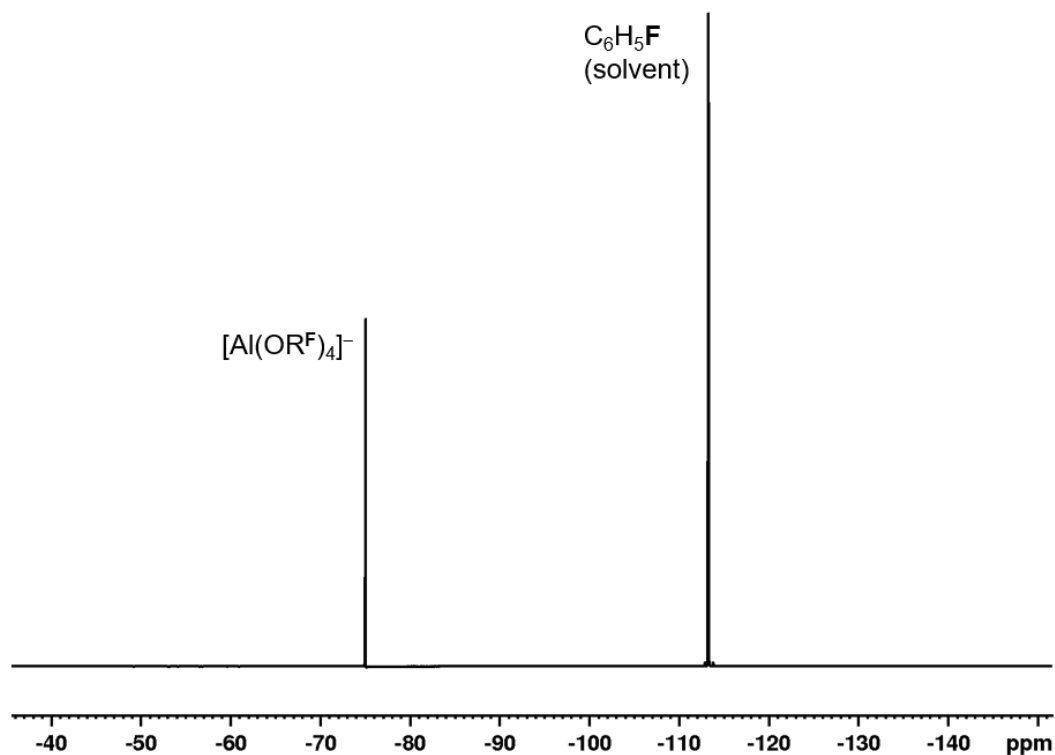

**S-Figure 27:**  $^{11}\text{F}$  NMR spectrum (282.5 MHz, PhF, 300K) of the decomposition of  $[\text{Ti}(\text{AlCp}^*)_3][\text{Al}(\text{OR}^{\text{F}})_4]$  **3** after 4 days.



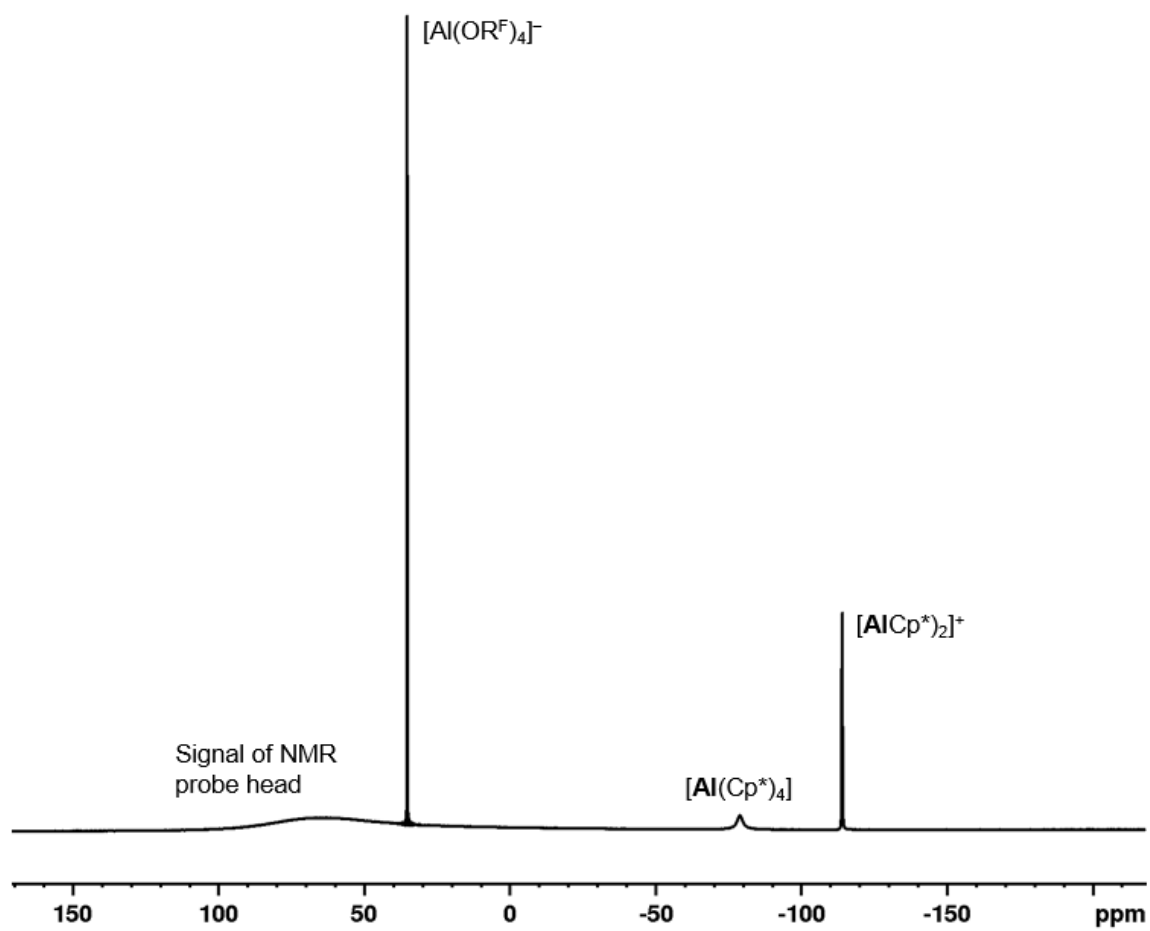

**S-Figure 28:**  $^{27}\text{Al}$  NMR spectrum (78.2 MHz, PhF, 300K) of the decomposition of  $[\text{Ti}(\text{AlCp}^*)_3][\text{Al}(\text{OR}^{\text{F}})_4]$  **3** after 4 days.

## Experimental data for [Ga(Me<sub>3</sub>TACN)][Al(OR<sup>F</sup>)<sub>4</sub>] 7

### Procedure: Synthesis of 7

[Ga(PhF)<sub>2-3</sub>][Al(OR<sup>F</sup>)<sub>4</sub>] (100 mg, 81.4 μmol) was dissolved in PhF (2.5 mL). A solution of Me<sub>3</sub>TACN in PhF (0.2 M, 0.45 mL, 90 μmol, 1.2 equiv.) were added to yield a slightly yellow solution which was layered with *n*-pentane. The title compound (89 mg, 74 μmol, 91 %) was isolated as colourless powder.

<sup>1</sup>H NMR spectrum (400.16 MHz, PhF, 298 K): δ = 2.12 (s, 9 H, -CH<sub>3</sub>), 2.32 (m<sub>c</sub>, 8 H, -CH<sub>2</sub>-) ppm.

<sup>1</sup>H, <sup>13</sup>C HMBC spectrum (400.16 MHz, 100.6 MHz, PhF, 298 K): δ(<sup>13</sup>C) = 43.7(-CH<sub>3</sub>), 52.7 (-CH<sub>2</sub>-) ppm.

<sup>19</sup>F NMR spectrum (376.54 MHz, PhF, 298 K): δ = -75.5 (s, 36 F, [Al(OC<sub>4</sub>F<sub>9</sub>)<sub>4</sub>]<sup>-</sup>) ppm.

<sup>27</sup>Al NMR spectrum (78.22 MHz, PhF, 298 K): δ = 35.1 (s, [Al(OC<sub>4</sub>F<sub>9</sub>)<sub>4</sub>]<sup>-</sup>).

<sup>71</sup>Ga NMR spectrum (122.04 MHz, PhF, 298 K): No signal.

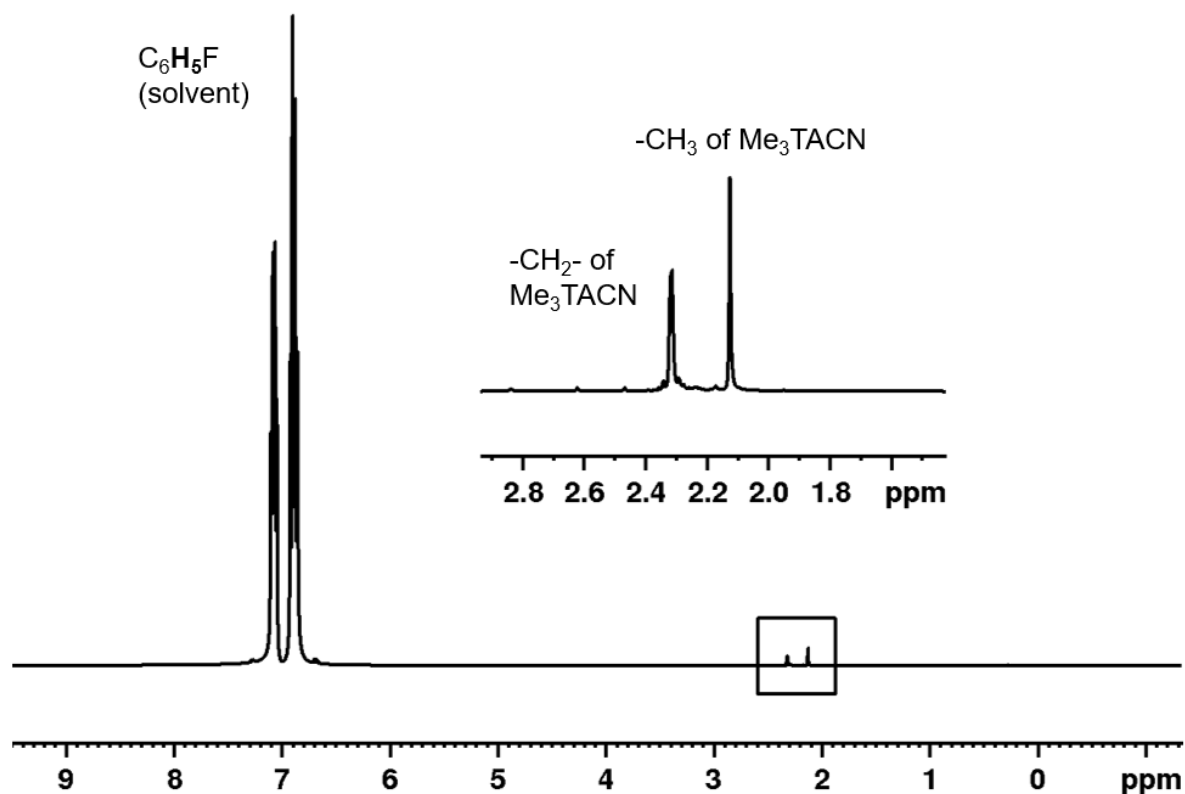

**S-Figure 29:** <sup>1</sup>H NMR spectrum (400.20 MHz, PhF, 300K) of [Ga(Me<sub>3</sub>TACN)]<sup>+</sup>[Al(OR<sup>F</sup>)<sub>4</sub>]<sup>-</sup> 7.

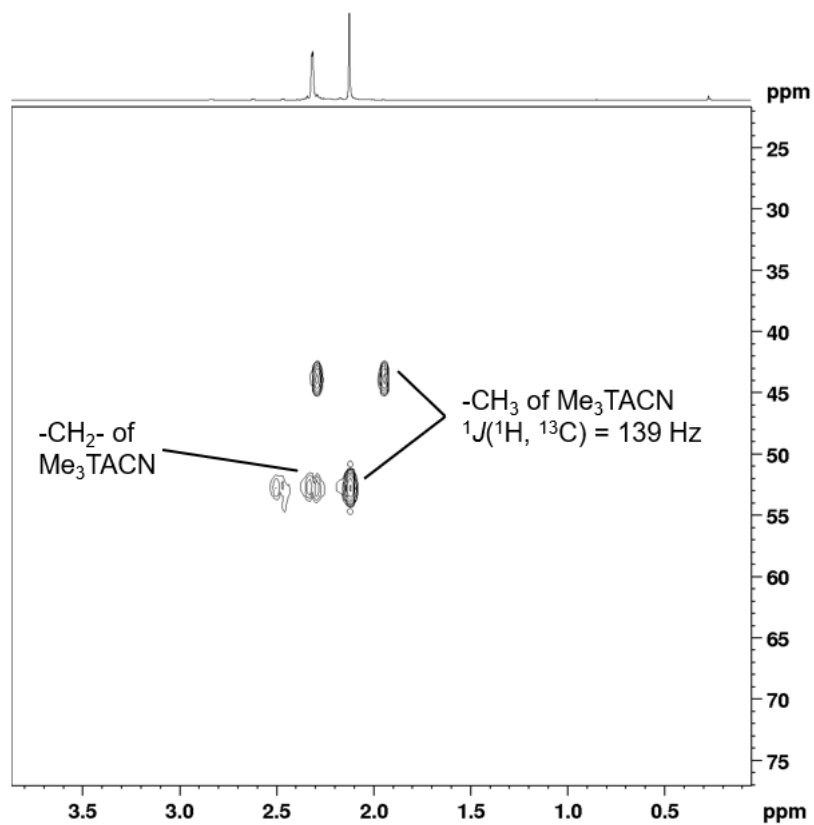

**S-Figure 30:**  $^1\text{H}$ - $^{13}\text{C}$  HMBC spectrum (400.20 MHz, 100.62 MHz, PhF, 300K) of  $[\text{Ga}(\text{Me}_3\text{TACN})]^+[\text{Al}(\text{OR}^{\text{F}})_4]^-$  7.

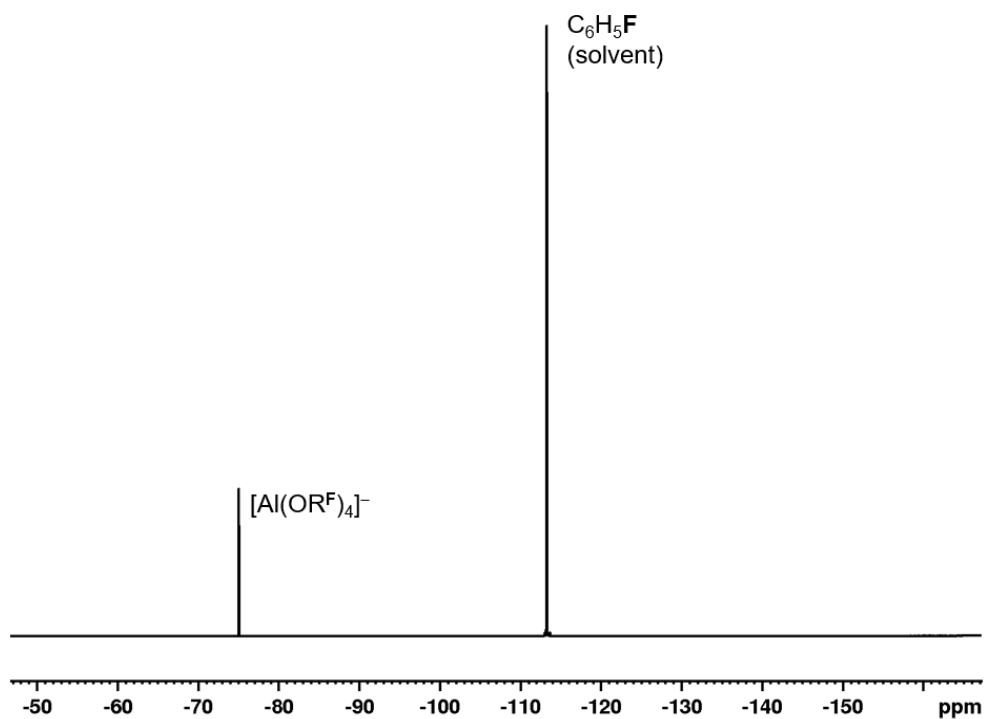

**S-Figure 31:**  $^{11}\text{F}$  NMR spectrum (376.5 MHz, PhF, 300K) of  $[\text{Ga}(\text{Me}_3\text{TACN})]^+[\text{Al}(\text{OR}^{\text{F}})_4]^-$  7.

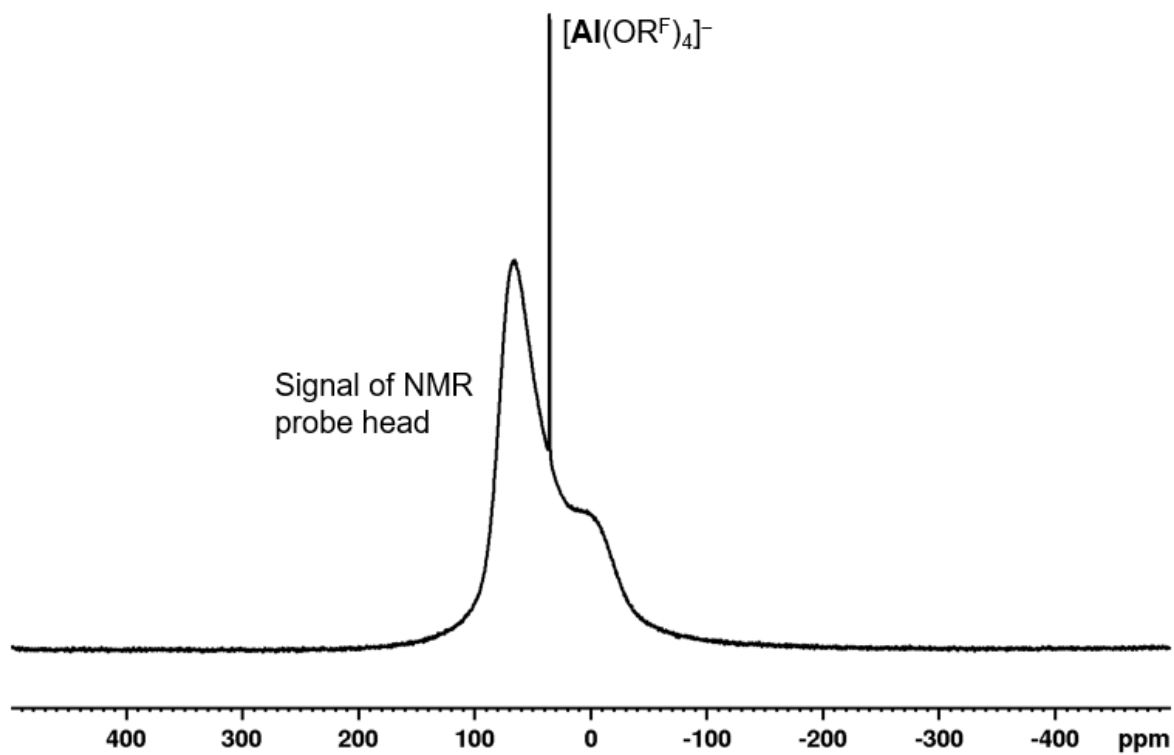

**S-Figure 32:**  $^{27}\text{Al}$  NMR spectrum (104.3 MHz, PhF, 300K) of  $[\text{Ga}(\text{Me}_3\text{TACN})]^+[\text{Al}(\text{OR}^{\text{F}})_4]^-$  7.

## Experimental data for $[\text{Ti}(\text{Me}_3\text{TACN})][\text{Al}(\text{OR}^{\text{F}})_4]$ **8**

### Procedure: Synthesis of **8**

$\text{Ti}[\text{Al}(\text{OR}^{\text{F}})_4]$  (170 mg, 145  $\mu\text{mol}$ ) was dissolved in PhF (1 mL). An excess of  $\text{Me}_3\text{TACN}$  (0.08 mL, 0.07 g, 0.4 mmol, 3 equiv.) were added. The colourless solution was layered with *n*-pentane. The title compound (160 mg, 137  $\mu\text{mol}$ , 94 %) was isolated as colourless powder.

**$^1\text{H}$  NMR spectrum (300.17 MHz, PhF, 298 K):**  $\delta$  = 1.92 (s, 9 H,  $-\text{CH}_3$ ), 2.28 (s, 8 H,  $-\text{CH}_2-$ ) ppm.

**$^1\text{H}$ ,  $^{13}\text{C}$  HMBC spectrum (300.17 MHz, 75.51 MHz, PhF, 298 K):**  $\delta(^{13}\text{C})$  = 44.2 ( $-\text{CH}_3$ ), 53.3 ( $-\text{CH}_2-$ ) ppm.

**$^{19}\text{F}$  NMR spectrum (282.45 MHz, PhF, 298 K):**  $\delta$  =  $-75.5$  (s, 36 F,  $[\text{Al}(\text{OC}_4\text{F}_9)_4]^-$ ) ppm.

**$^{27}\text{Al}$  NMR spectrum (78.22 MHz, PhF, 298 K):**  $\delta$  = 35.1 (s,  $[\text{Al}(\text{OC}_4\text{F}_9)_4]^-$ ).

The  $[\text{Ti}(\text{Me}_3\text{TACN})]^+$  is already literature known as  $[\text{Ti}(\text{Me}_3\text{TACN})][\text{PF}_6]$ .<sup>[11]</sup> Yet, no NMR signals have been reported. Interestingly, addition of an excess of  $\text{Me}_3\text{TACN}$  leads to significant shift of the  $\text{Me}_3\text{TACN}$  signal (S-Figure 33). This observation indicates a weak bonding of the  $\text{Me}_3\text{TACN}$  ligand to  $\text{Ti}^+$  with dynamic ligand-exchange in solution.

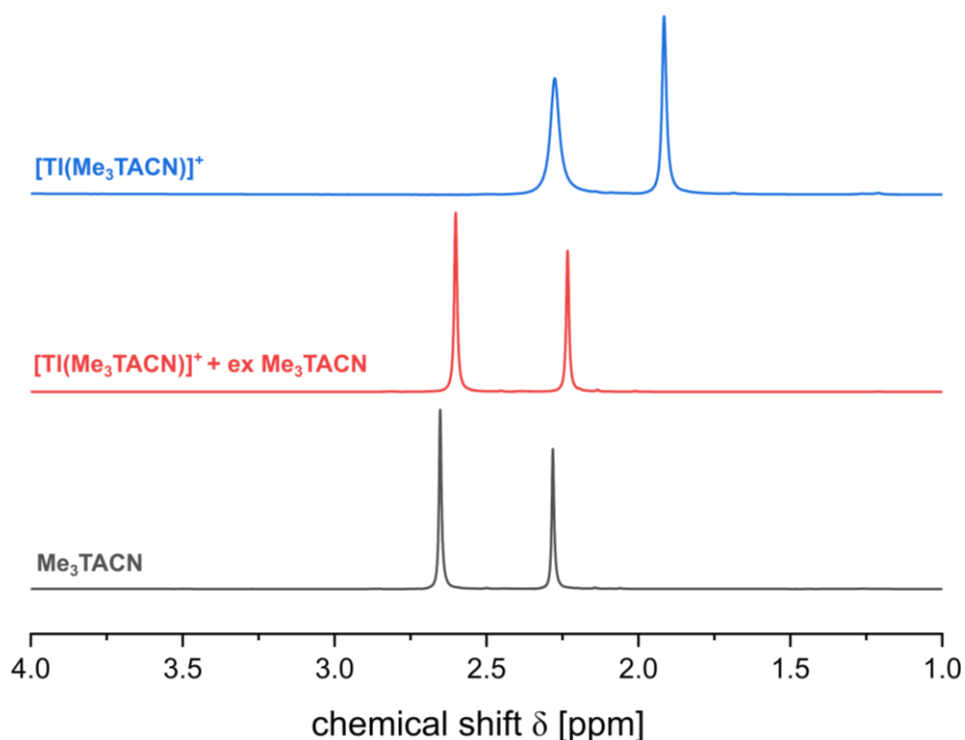

**S-Figure 33:** Comparison of  $^1\text{H}$  NMR spectra (300.15 MHz, PhF, 300K) of  $[\text{Ti}(\text{Me}_3\text{TACN})]^+[\text{Al}(\text{OR}^{\text{F}})_4]^-$  **8** before (top) and after (middle) addition of ex  $\text{Me}_3\text{TACN}$  (ca. 10 equiv, 0.03 mL) as well as the  $^1\text{H}$  NMR spectrum of clean  $\text{Me}_3\text{TACN}$ .

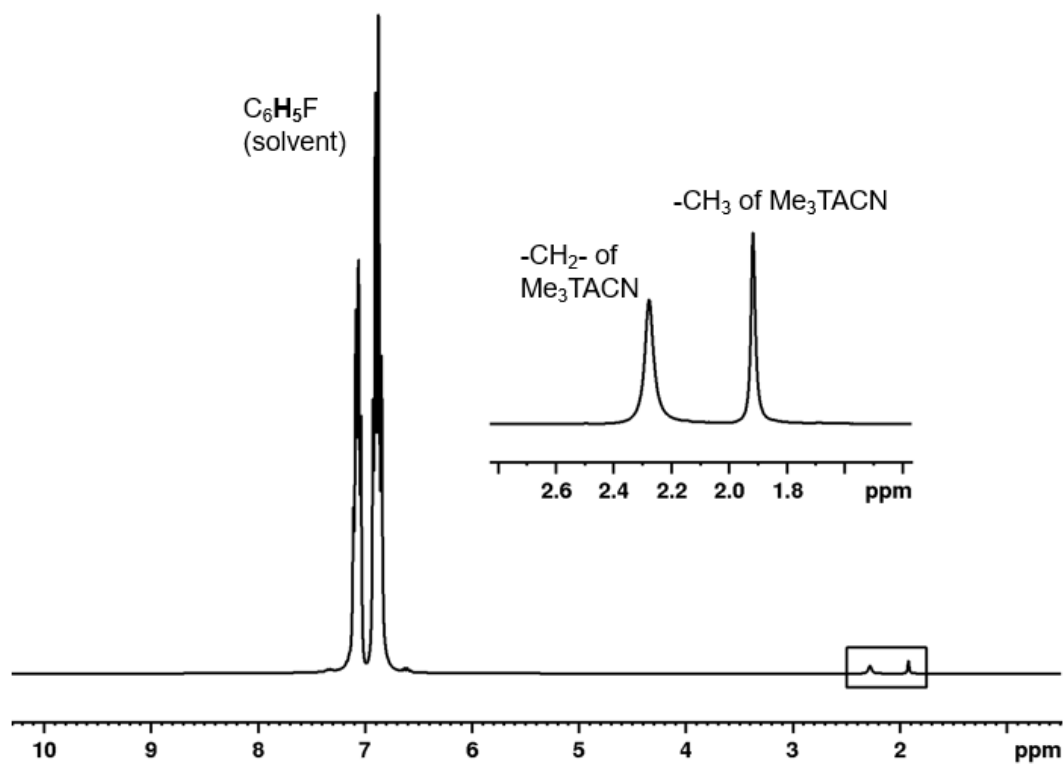

**S-Figure 34:**  $^1\text{H}$  NMR spectrum (300.15 MHz, PhF, 300K) of  $[\text{Ti}(\text{Me}_3\text{TACN})]^+[\text{Al}(\text{OR}^{\text{F}})_4]^-$  **8**.

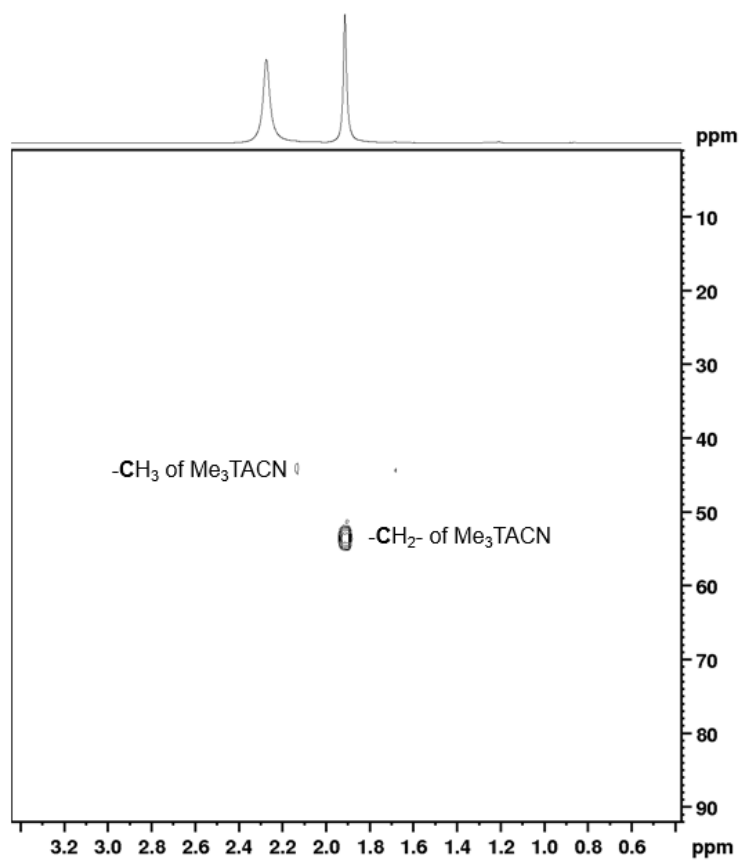

**S-Figure 35:**  $^1\text{H}$ - $^{13}\text{C}$  HMBC spectrum (300.17 MHz, 75.51 MHz, PhF, 300K) of  $[\text{Ti}(\text{Me}_3\text{TACN})]^+[\text{Al}(\text{OR}^{\text{F}})_4]^-$  **8**.

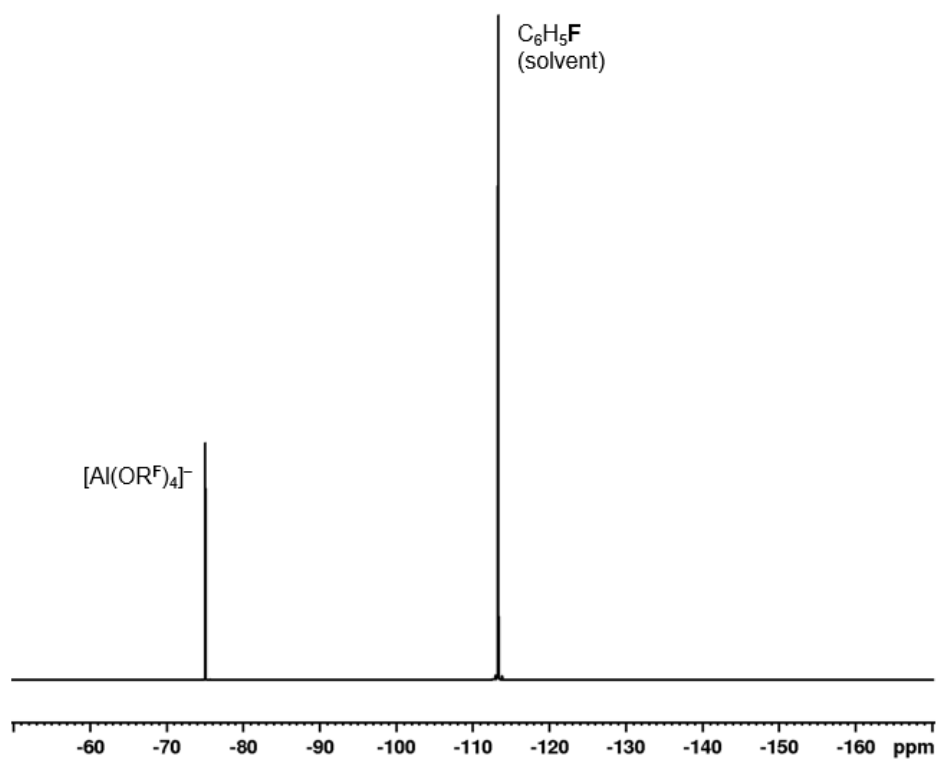

**S-Figure 36:**  $^{11}\text{F}$  NMR spectrum (282.45 MHz,  $\text{PhF}$ , 300K) of  $[\text{Tl}(\text{Me}_3\text{TACN})]^+[\text{Al}(\text{OR}^{\text{F}})_4]^-$  **8**.

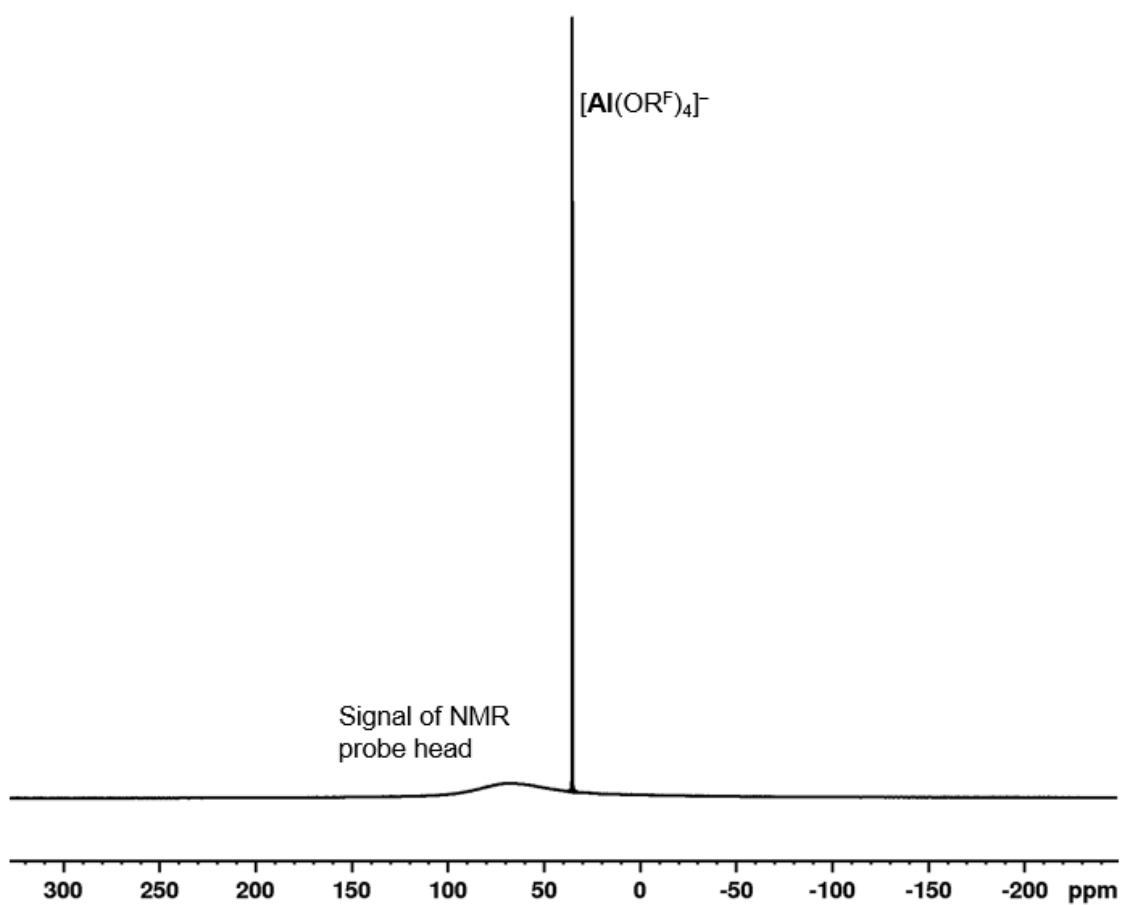

**S-Figure 37:**  $^{27}\text{Al}$  NMR spectrum (78.22 MHz,  $\text{PhF}$ , 300K) of  $[\text{Tl}(\text{Me}_3\text{TACN})]^+[\text{Al}(\text{OR}^{\text{F}})_4]^-$  **8**.

## Experimental data for [(Me<sub>3</sub>TACN)Al(AICp<sup>\*</sup>)<sub>3</sub>][Al(OR<sup>F</sup>)<sub>4</sub>] **4**

### Procedure 1: Synthesis of **4** from **8**

[Ti(Me<sub>3</sub>TACN)][Al(OR<sup>F</sup>)<sub>4</sub>] **8** (70 mg, 60 μmol) and [(AICp<sup>\*</sup>)<sub>4</sub>] (39 mg, 0.24 mmol, 1 equiv.) were weighed into a Schlenk tube and fluorobenzene (3 mL) was added. The yellow suspension was heated to 60°C for 3h solution. The yellow solution was filtered off from minor metallic precipitate (S-Figure 38). Then, *n*-pentane (10 mL) was added to precipitate the product. The title compound (95 mg, 60 μmol, 95 %) was isolated as yellow powder.

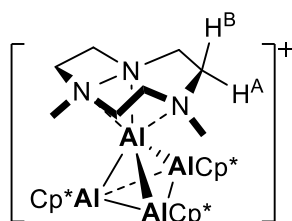

**<sup>1</sup>H NMR spectrum (400.16 MHz, PhF, 298 K):** δ = 1.85 (s, 45 H, [(Me<sub>3</sub>TACN)Al(AICp<sup>\*</sup>)<sub>3</sub>]<sup>+</sup>), 2.34 (m<sub>c</sub>, 6H, H<sup>B</sup>), 2.39 (s, 9H, -CH<sub>3</sub>), 2.63 (m<sub>c</sub>, 6H, H<sup>A</sup>) ppm.

**<sup>1</sup>H, <sup>13</sup>C HMBC spectrum (400.16 MHz, 100.6 MHz, PhF, 298 K):** δ(<sup>13</sup>C) = 10.9 (-CCH<sub>3</sub>), 48.9 (-NCH<sub>3</sub>), 51.33 (-CH<sub>2</sub>-) 114.4 (C<sub>5</sub>Me<sub>5</sub>) ppm.

**<sup>19</sup>F NMR spectrum (376.54 MHz, PhF, 298 K):** δ = -75.0 (s, 36 F, [Al(OC<sub>4</sub>F<sub>9</sub>)<sub>4</sub>]<sup>-</sup>) ppm.

**<sup>27</sup>Al NMR spectrum (78.22 MHz, PhF, 298 K):** δ = 35.0 (s, [Al(OC<sub>4</sub>F<sub>9</sub>)<sub>4</sub>]<sup>-</sup>), -77.0 (s, [(TACN)Al(AICp<sup>\*</sup>)<sub>3</sub>]<sup>+</sup>) ppm.

**FTIR spectrum (ZnSe-ATR):**  $\tilde{\nu}$  = 2919 (vw), 2865 (vw), 1499 (vw), 1458 (vw), 1426 (vw), 1385 (vw), 1376 (vw), 1351 (vw), 1299 (w), 1276 (m), 1240 (s), 1212 (vs), 1164 (w), 1069 (vw), 1056 (vw), 1003 (vw), 972 (vs), 899 (vw), 830 (vw), 809 (vw), 798 (vw), 778 (vw), 755 (vw), 740 (vw), 727 (vs), 671 (vw), 589 (vw), 571 (vw), 560 (vw) cm<sup>-1</sup>.

**Raman (25 mW, 10000 scans):**  $\tilde{\nu}$  = 2927 (vs), 2826 (w), 2756 (w), 1503 (vw), 1489 (vw), 1458 (w), 1428 (m), 1386 (w), 797 (vw), 745 (vw), 595 (w), 553 (vw), 401 (w), 127 (vs), 114 (vs), 74 (s), 188 (w), 235 (vw), 321 (w), 370 (w), 538 (vw) cm<sup>-1</sup>.



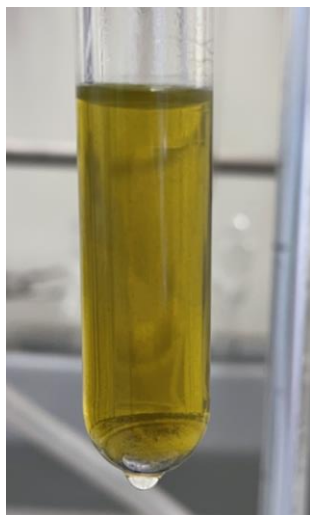

S-Figure 38: Reaction solution of **8** with  $[\text{AlCp}^*]_4$  in PhF after heating showing the intense yellow colour of **4** along with metallic thallium formed at the stirring bar.

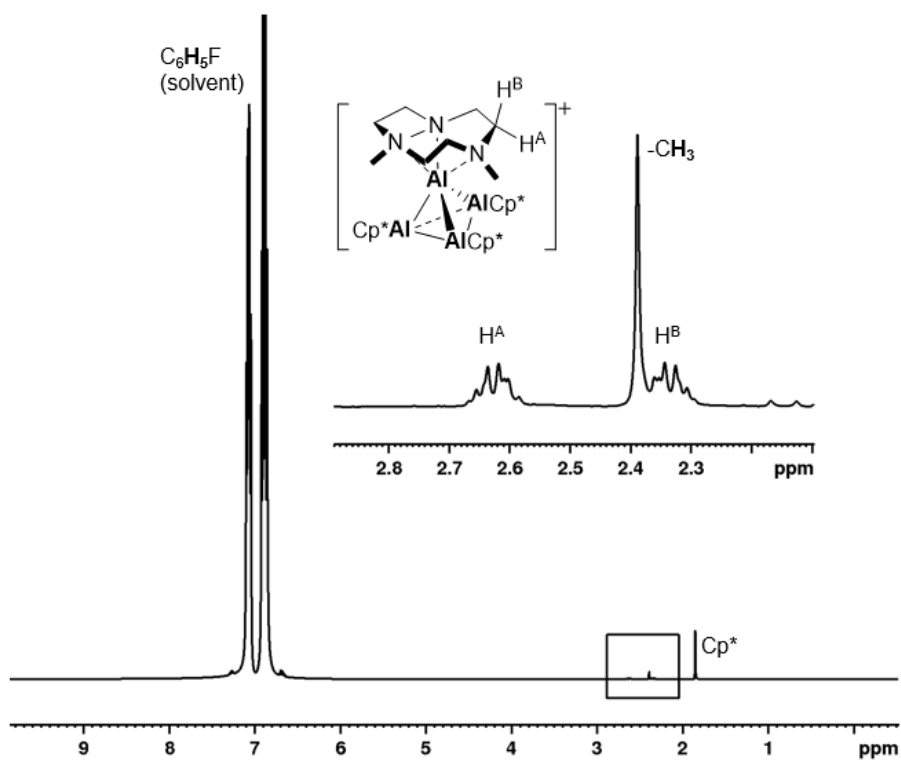

S-Figure 39:  $^1\text{H}$  NMR spectrum (400.20 MHz, PhF, 300K) of  $[(\text{Me}_3\text{TACN})\text{Al}(\text{AlCp}^*)_3][\text{Al}(\text{OR}^{\text{F}})_4]$  **4**.

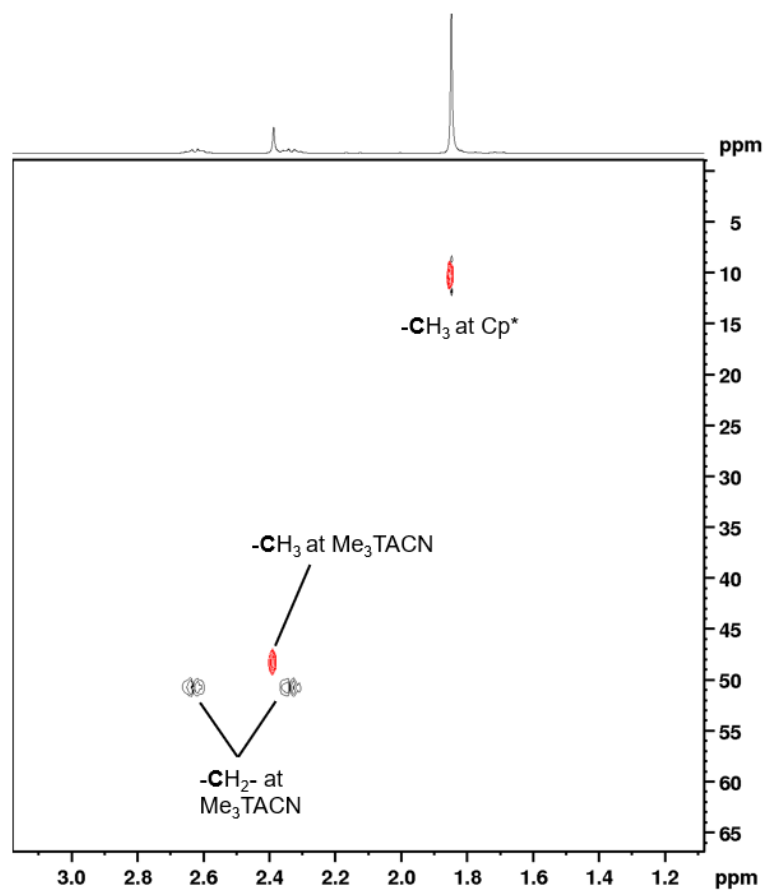

**S-Figure 40:**  $^1\text{H}$ - $^{13}\text{C}$  HSQC spectrum (400.20 MHz, 100.62 MHz, PhF, 300K) of  $[(\text{Me}_3\text{TACN})\text{Al}(\text{AICp}^*)_3][\text{Al}(\text{OR}^{\text{F}})_4]$  **4**.

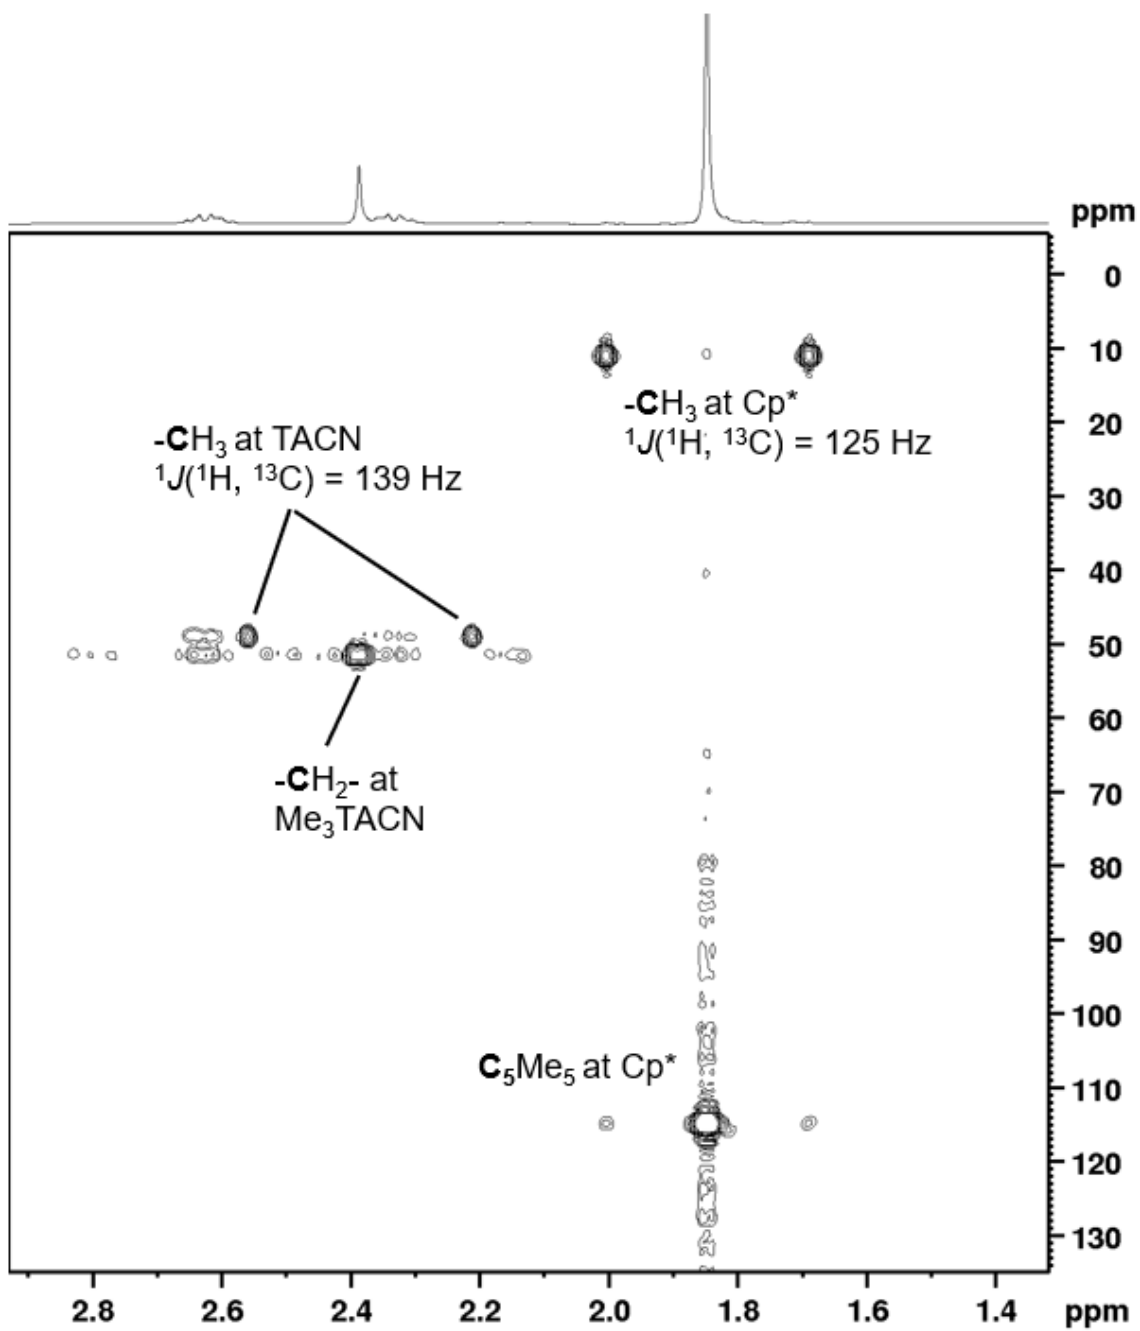

**S-Figure 41:**  $^1\text{H}$ - $^{13}\text{C}$  HMBC spectrum (400.20 MHz, 100.62 MHz, PhF, 300K) of  $[(\text{Me}_3\text{TACN})\text{Al}(\text{AICp}^*)_3][\text{Al}(\text{OR}^{\text{F}})_4]$  **4**.

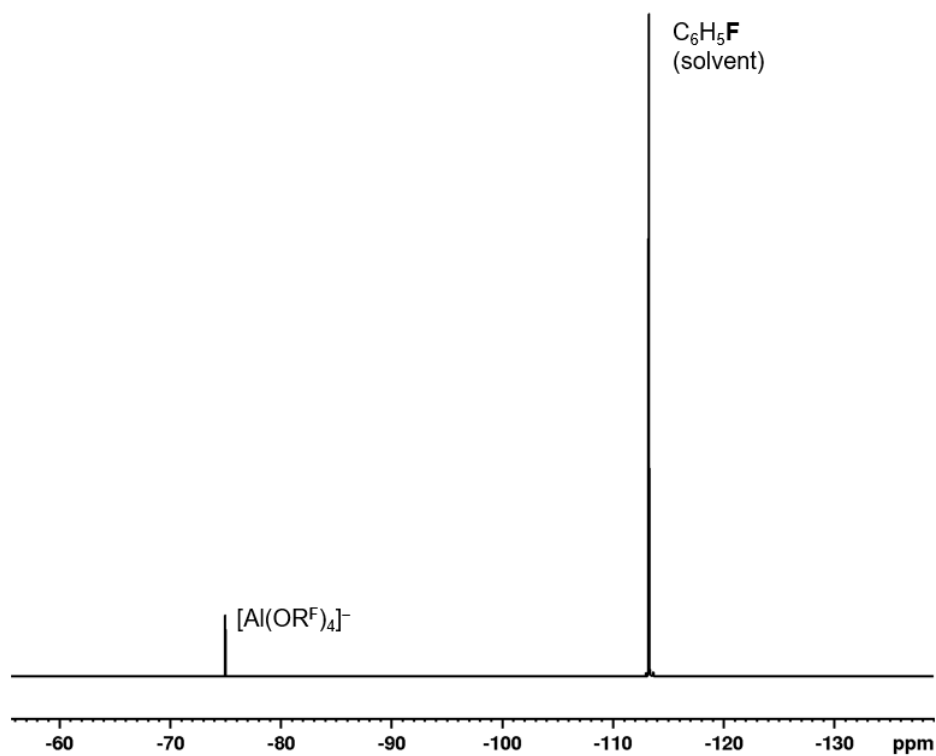

**S-Figure 42:**  $^{11}\text{F}$  NMR spectrum (376.5 MHz, PhF, 300K)  $[(\text{Me}_3\text{TACN})\text{Al}(\text{AlCp}^*)_3][\text{Al}(\text{OR}^{\text{F}})_4]$  **4**.

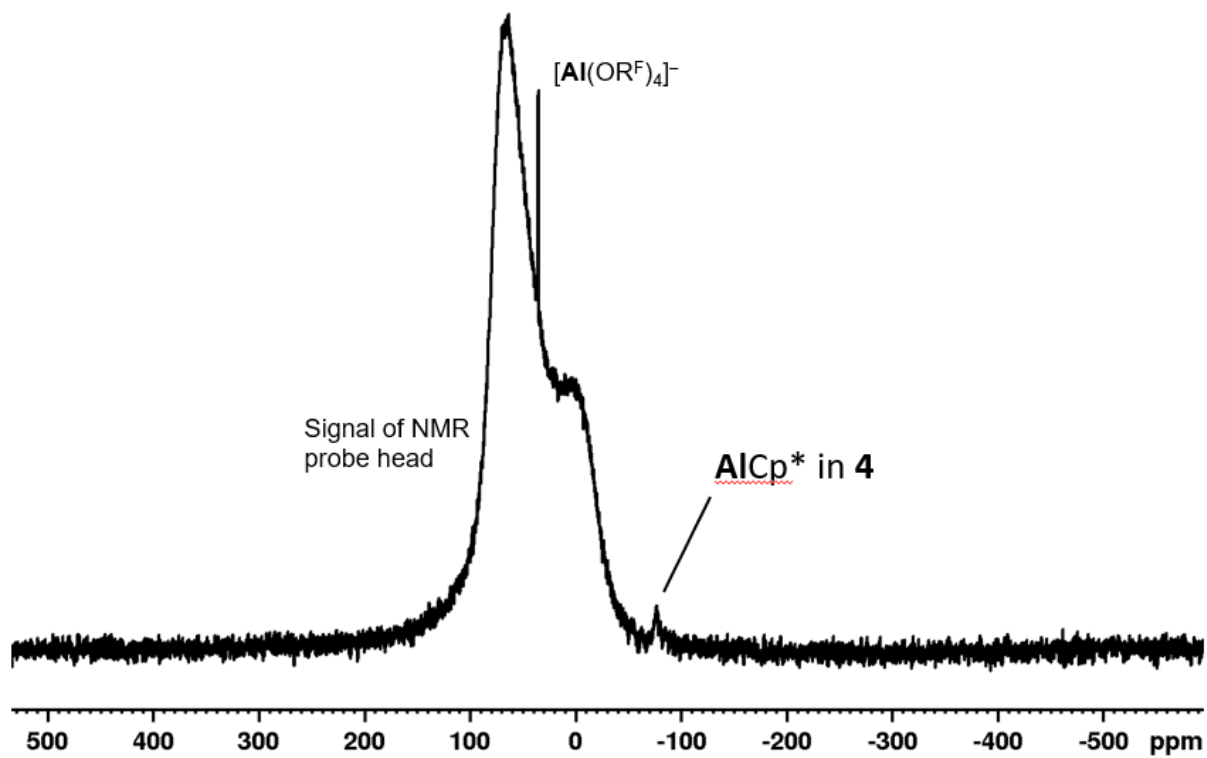

**S-Figure 43:**  $^{27}\text{Al}$  NMR spectrum (104.3 MHz, PhF, 300K) of  $[(\text{Me}_3\text{TACN})\text{Al}(\text{AlCp}^*)_3][\text{Al}(\text{OR}^{\text{F}})_4]$  **4**.

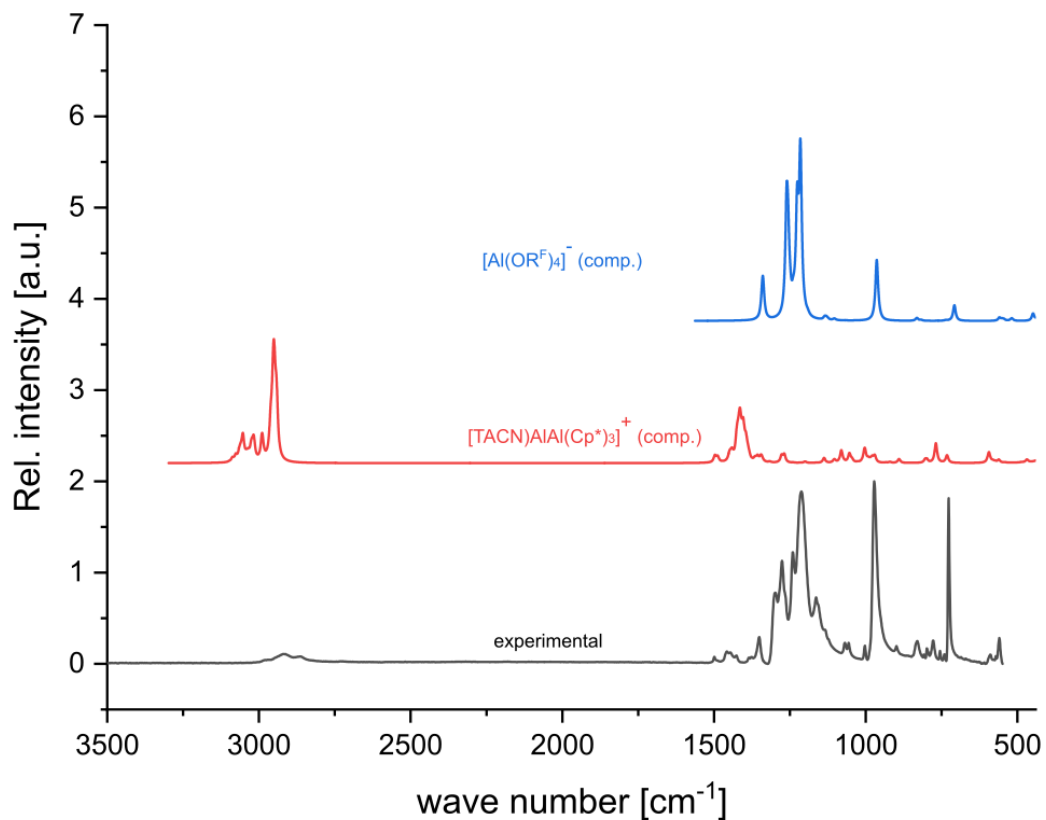

S-Figure 44: Experimental IR spectrum of **4** and computed IR spectra for the  $[(\text{Me}_3\text{TACN})\text{Al}(\text{AlCp}^*)_3]^+$  cation and the  $[\text{Al}(\text{OR}^{\text{F}})_4]^-$  anion (bp86-d3bj/def2-svp).

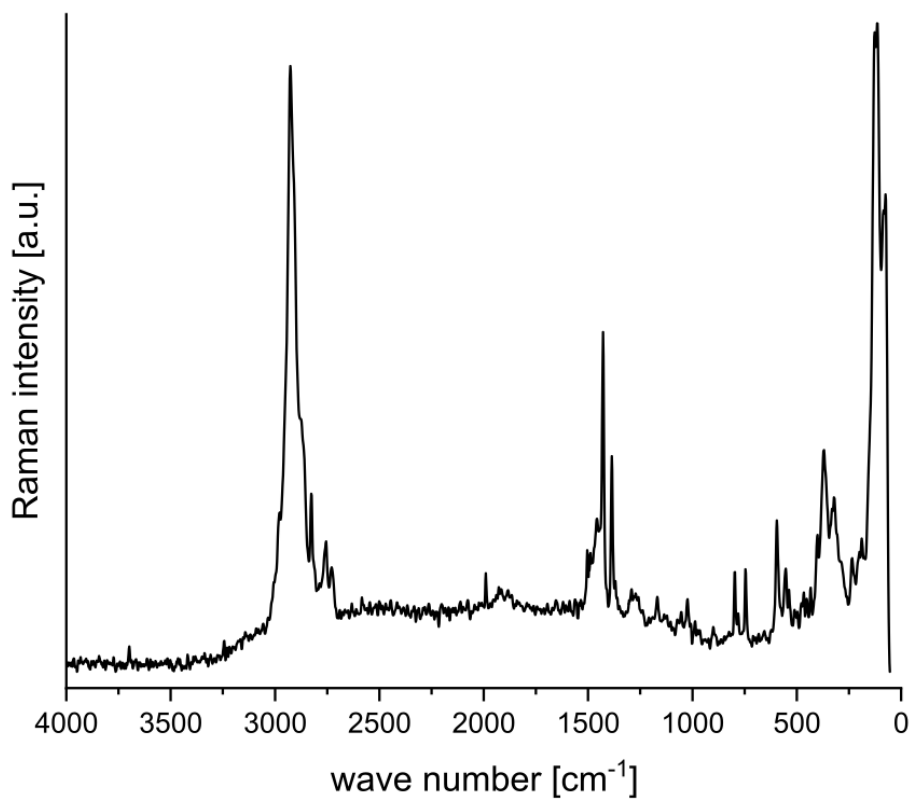

S-Figure 45: Experimental Raman spectrum of **4**.

**Procedure 2:** Synthesis of **4** from **7**

[Ga(TACN)][Al(OR<sup>F</sup>)<sub>4</sub>] **7** (60 mg, 50 μmol) and [(AlCp\*)<sub>4</sub>] (32 mg, 0.20 mmol, 1 equiv.) were weighed into a Schlenk tube and fluorobenzene (3 mL) was added. The yellow suspension was heated to 60°C for 5h solution. Then, the yellow solution was layered with *n*-pentane. The title compound (72 mg, 50 μmol, 88 %) was isolated as yellow crystals.

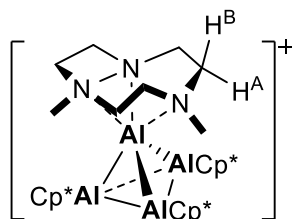

<sup>1</sup>H NMR spectrum (400.16 MHz, 1,2-DFB, 298 K): δ = 1.91 (s, 45 H, [(Me<sub>3</sub>TACN)Al(AlCp\*)<sub>3</sub>]<sup>+</sup>), 2.68 (s, 9H, -CH<sub>3</sub>), 2.85 (mc, 6H, H<sup>B</sup>), 3.00 (mc, 6H, H<sup>A</sup>) ppm.

<sup>19</sup>F NMR spectrum (376.54 MHz, 1,2-DFB, 298 K): δ = -75.0 (s, 36 F, [Al(OC<sub>4</sub>F<sub>9</sub>)<sub>4</sub>]<sup>-</sup>) ppm.

<sup>27</sup>Al NMR spectrum (78.22 MHz, 1,2-DFB, 298 K): δ = 35.0 (s, [Al(OC<sub>4</sub>F<sub>9</sub>)<sub>4</sub>]<sup>-</sup>), -77.0 (s, [(TACN)Al(AlCp\*)<sub>3</sub>]<sup>+</sup>) ppm.

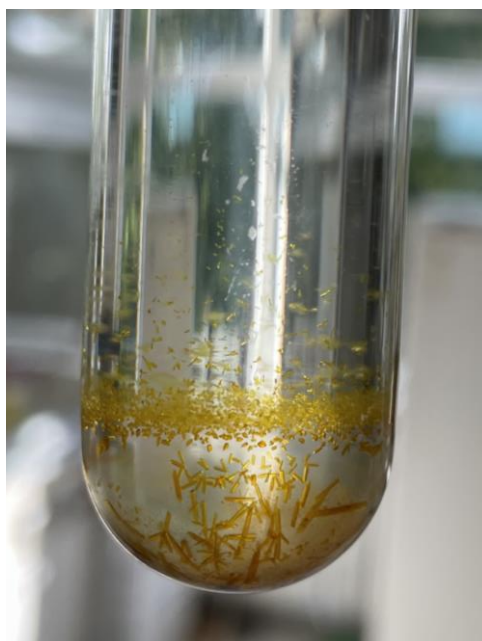

S-Figure 46: Yellow crystals of **4**.

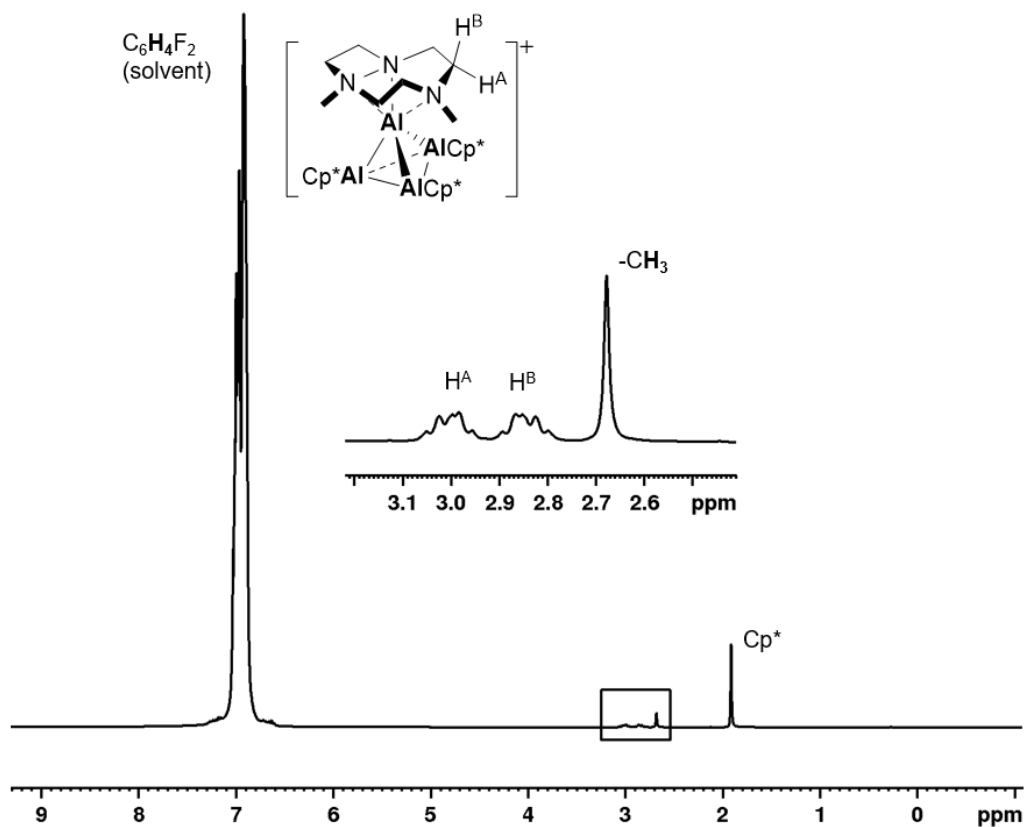

**S-Figure 47:**  $^1H$  NMR spectrum (300.17 MHz, 1,2-DFB, 300K) of  $[(Me_3TACN)Al(AICp^*)_3][Al(OR^F)_4]$  **4**.

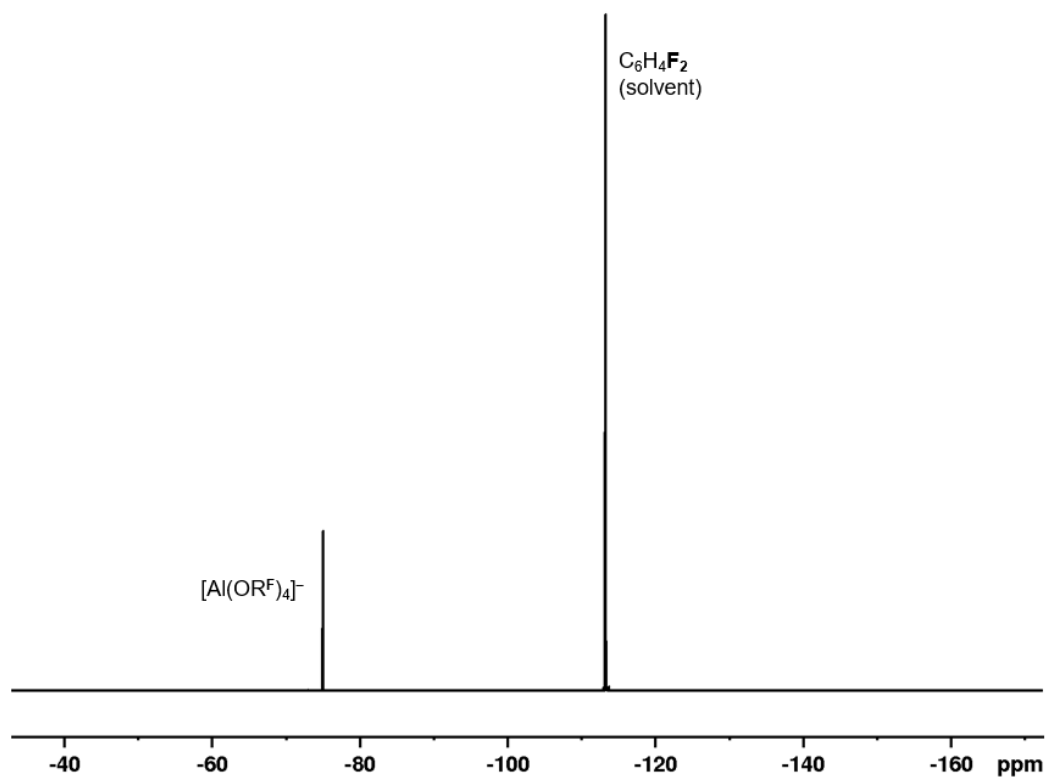

**S-Figure 48:**  $^{11}F$  NMR spectrum (282.5 MHz, 1,2-DFB, 300K) of  $[(Me_3TACN)Al(AICp^*)_3][Al(OR^F)_4]$  **4**.

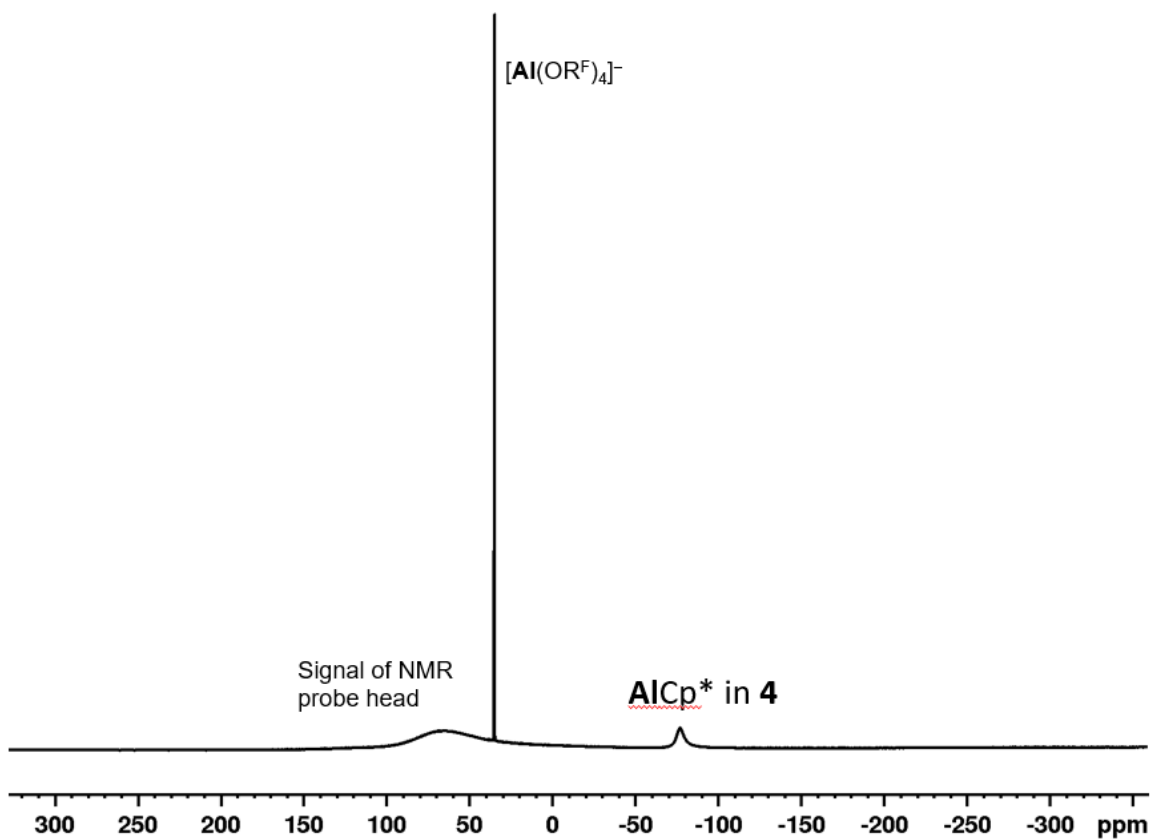

**S-Figure 49:**  $^{27}\text{Al}$  NMR spectrum (78.2 MHz, 1,2-DFB, 300K) of  $[(\text{Me}_3\text{TACN})\text{Al}(\text{AlCp}^*)_3][\text{Al}(\text{OR}^{\text{F}})_4]$  **4**.



## S-2 Mechanistic studies on the reaction of $[\text{Ti}(\text{AlCp}^*)_3][\text{Al}(\text{OR}^F)_4]$ **3** with $\text{Me}_3\text{TACN}$

To study the reaction between **3** and TACN yielding **4** in PhF at room temperature, in situ NMR studies were performed. Hence,  $[\text{Ti}(\text{AlCp}^*)_3][\text{Al}(\text{OR}^F)_4]$  **3** (25 mg, 15  $\mu\text{mol}$ ) was dissolved in PhF (0.5 mL) in a young NMR tube. Then, a solution of TACN in PhF was added (0.4 M, 0.08 mL, 0.03 mmol, 2 equiv.) at room temperature. After 1h already, the formation of a black precipitate was observed. Moreover, yellow crystals of  $\text{Al}_4^+$  formed in the NMR tube.

The  $^{27}\text{Al}$  NMR spectrum directly after addition of  $\text{Me}_3\text{TACN}$  shows the initial formation of  $[(\text{AlCp}^*)_4]$  (S-Figure 49). Already after 1h, a shoulder of the  $\text{Al}_4^+$  cluster can be observed at  $\delta = -77.0$  ppm. In the following hours, the product signal intensified whereas the intensity of the  $[(\text{AlCp}^*)_4]$  decreased. After 11 h, the  $^{27}\text{Al}$  NMR resonance of  $[(\text{AlCp}^*)_4]$  has vanished. Besides a very weak singlet of an unknown species at  $\delta = -46.2$  ppm, no signals assignable to intermittent  $\text{TlAl}_3^+$  clusters could be detected.

The first detected  $^1\text{H}$  NMR spectrum verifies the initial formation of  $[(\text{AlCp}^*)_4]$  via break-up of **3**. Moreover,  $^1\text{H}$  NMR signals of  $[\text{Ti}(\text{Me}_3\text{TACN})]^+$  are detected as by-product. Yet, as previously shown for solutions of  $[\text{Ti}(\text{Me}_3\text{TACN})]^+$  **7** with excess  $\text{Me}_3\text{TACN}$ , a dynamic exchange of the  $\text{Me}_3\text{TACN}$  coordinated to the  $\text{Ti}^+$  cation leads to the observation of an average peak for the two species (S-Figure 33). This dynamic behaviour can also be seen here. With removal of **7** by reaction with  $[(\text{AlCp}^*)_4]$  to **4** and consecutively lowering of the concentration of  $[\text{Ti}(\text{Me}_3\text{TACN})]^+$ , the average peaks shift to the chemical shifts detected for free  $\text{Me}_3\text{TACN}$ . Moreover, the  $^1\text{H}$  NMR spectrum shows proton resonances assigned to **4** already after 30 min. After 18h, the  $[(\text{AlCp}^*)_4]$  signal has depleted quantitatively. In addition to the proton resonances of **4**, a novel species is formed in the reaction which shows a singlet at  $\delta = 2.15$  ppm. The  $^1\text{H}$ ,  $^{13}\text{C}$  HMBC spectrum shows that this species corresponds to a symmetrically coordinating  $\text{Cp}^*$ -ligand. Most likely, the novel  $\text{Cp}^*$  compound represents a  $\text{TiCp}^*$  unit.

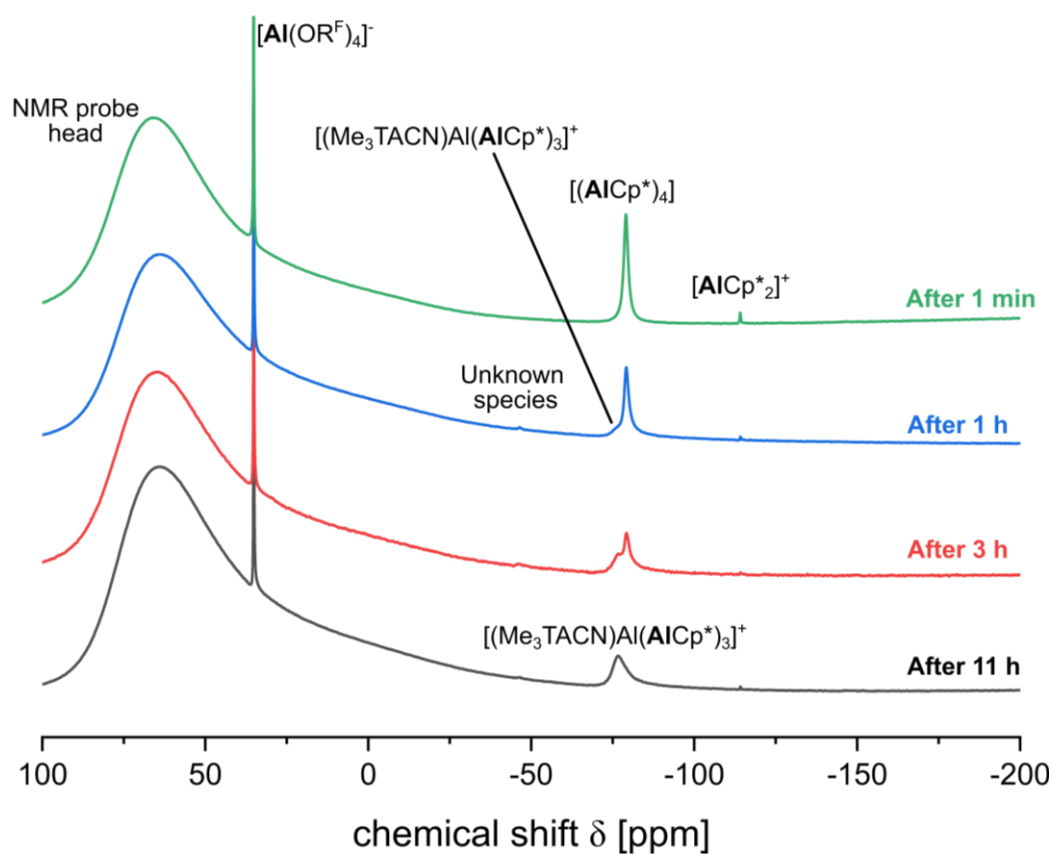

**S-Figure 50:** In situ  $^{27}\text{Al}$  NMR spectra (104.27 MHz, PhF, 300K) for the reaction of **3** with  $\text{Me}_3\text{TACN}$ .

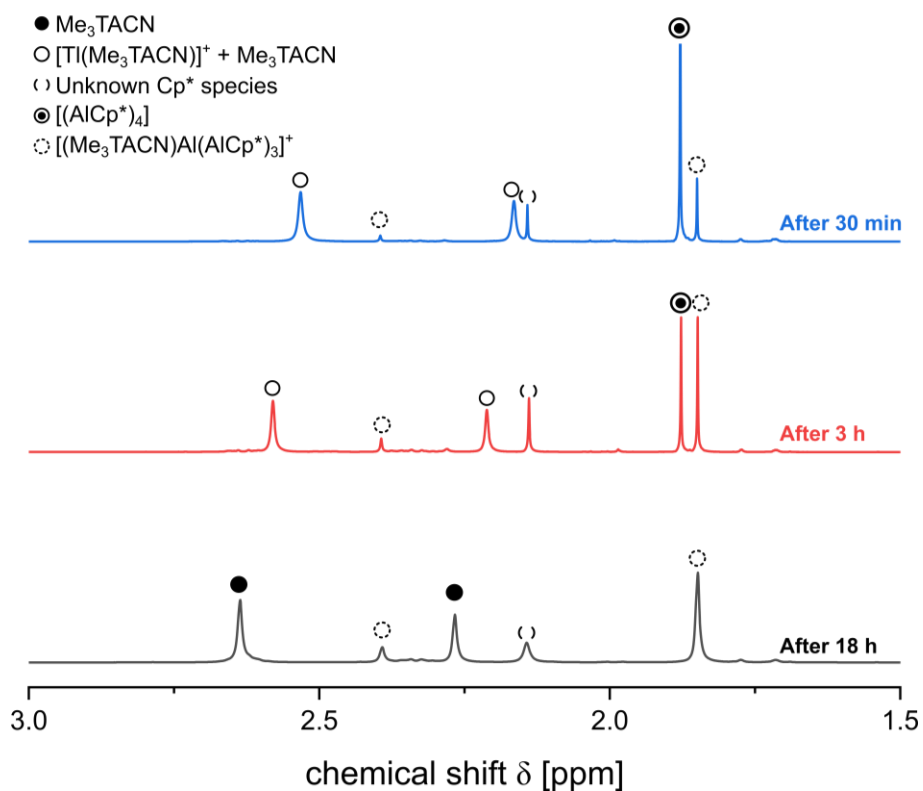

**S-Figure 51:** In situ  $^1\text{H}$  NMR spectra (400.20 MHz, PhF, 300K) for the reaction of **3** with  $\text{Me}_3\text{TACN}$ .

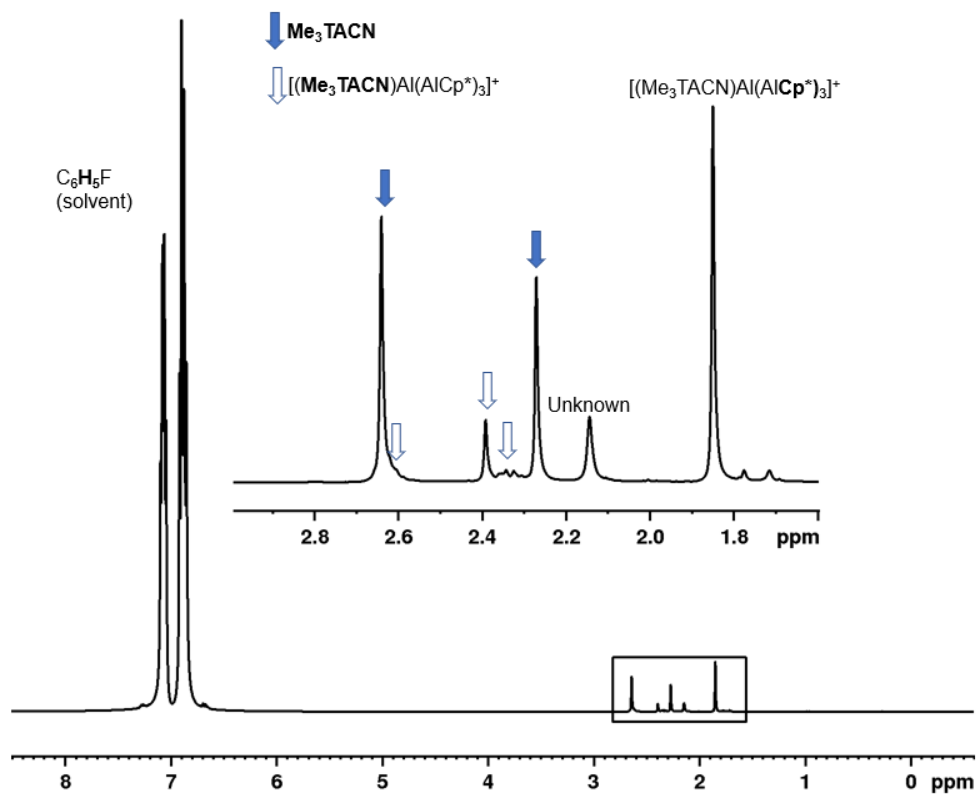

**S-Figure 52:**  $^1\text{H}$  NMR spectrum (400.20 MHz, PhF, 300K) of reaction of **3** with  $\text{Me}_3\text{TACN}$  after 18h.

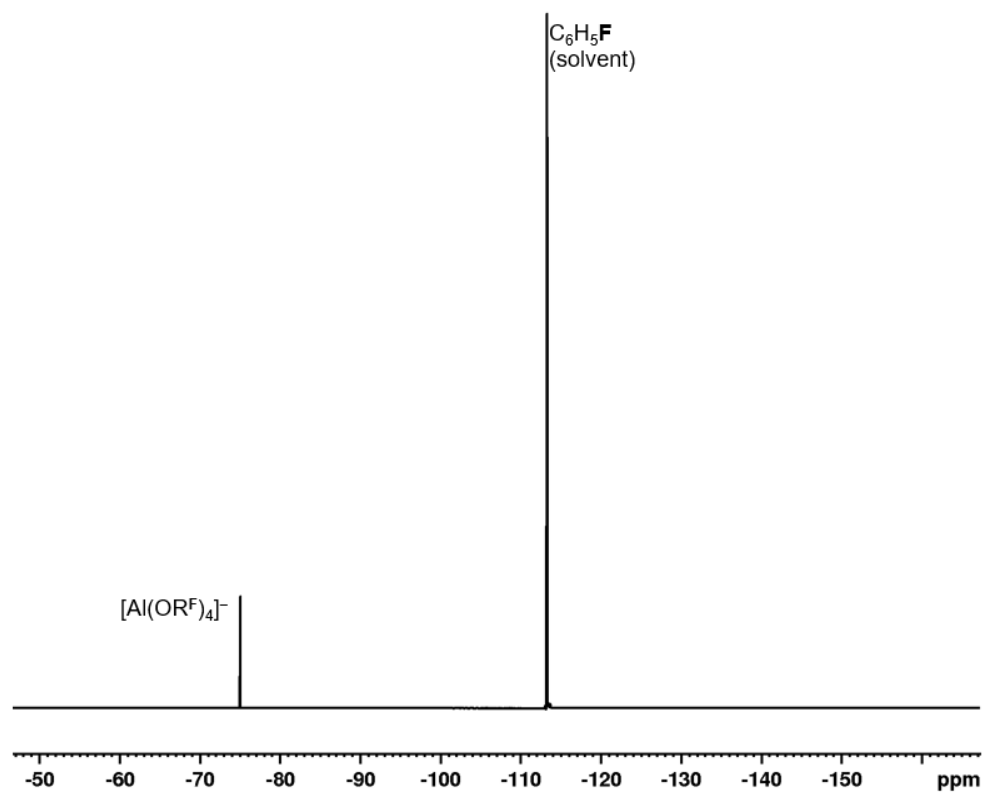

**S-Figure 53:**  $^{11}\text{F}$  NMR spectrum (376.5 MHz, PhF, 300K) of reaction of **3** with  $\text{Me}_3\text{TACN}$  after 18h.

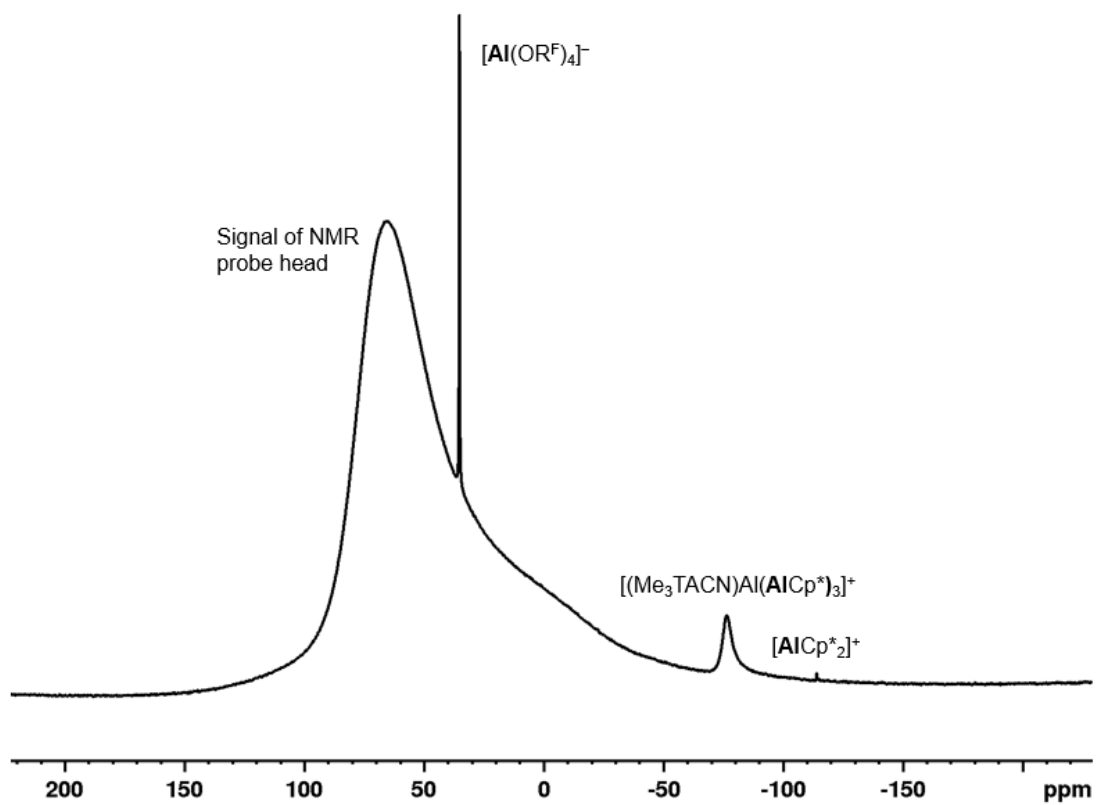

**S-Figure 54:**  $^{27}\text{Al}$  NMR spectrum (104.3 MHz, PhF, 300K) of reaction of **3** with  $\text{Me}_3\text{TACN}$  after 18h.

## Computation of the thermodynamics in solution

Although the NMR spectra for the mechanistic NMR study for the reaction of **3** with Me<sub>3</sub>TACN did not allow for the observations of intermittent TlAl<sub>3</sub><sup>+</sup> clusters, we computed the thermodynamics of the reaction mechanism proposed for the reaction with the gallium complex **1** for thallium. Here, an in total exergonic reaction enthalpy to form TICp\* and the Al<sub>4</sub><sup>+</sup> cluster was calculated. Moreover, the formation of [Tl(Me<sub>3</sub>TACN)]<sup>+</sup> and [(AlCp\*)<sub>4</sub>] is slightly exergonic, which coincides with the observations in the NMR spectrum.

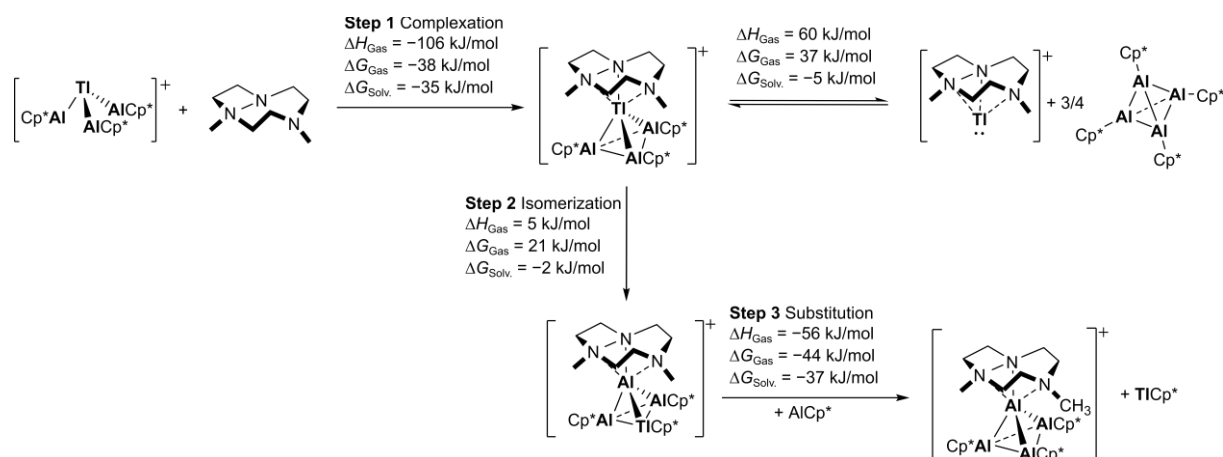

S-Figure 55: Postulated mechanism of the formation of **4**<sup>+</sup> from **3**<sup>+</sup> and Me<sub>3</sub>TACN as well as computed thermodynamics (b3lyp-d3bj/def2-svp//bp86-d3bj/def2-svp with cosmo-rs in fluorobenzene).

### S-3 Mechanistic studies on the reaction of $[\text{Ga}(\text{AlCp}^*)_3][\text{Al}(\text{OR}^{\text{F}})_4]$ **1** with $\text{Me}_3\text{TACN}$

To study the reaction between **3** and  $\text{Me}_3\text{TACN}$  yielding **4** in PhF at room temperature, in situ NMR studies were performed. Hence,  $[\text{Ga}(\text{AlCp}^*)_3][\text{Al}(\text{OR}^{\text{F}})_4]$  **3** (32 mg, 21  $\mu\text{mol}$ ) was dissolved in PhF (0.5 mL) in a young NMR tube. Then, a solution of TACN in PhF was added (0.4 M, 0.11 mL, 0.04 mmol, 2 equiv.) at room temperature. After 24 h the formation of orange crystals could be observed, which were analysed by scXRD to be the product **4**.

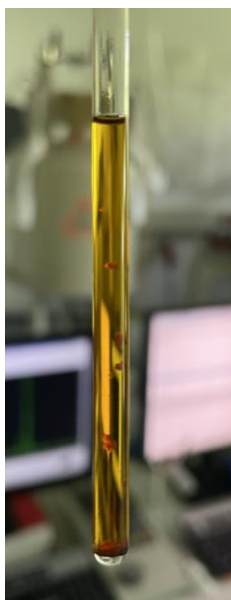

S-Figure 56: Young NMR with orange crystals of **4** after 24h.

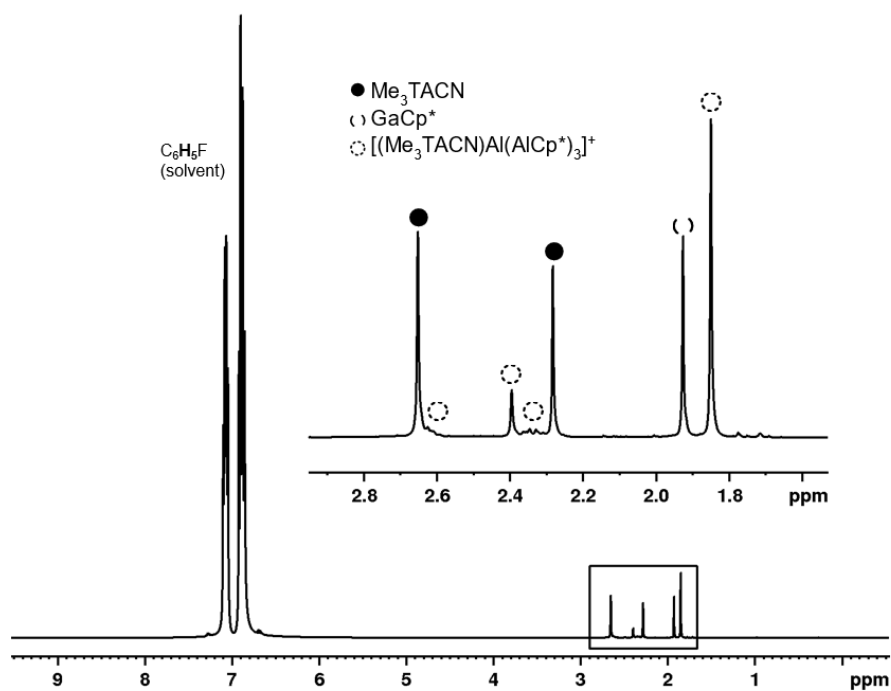

**S-Figure 57:** <sup>1</sup>H NMR spectrum (400.20 MHz, PhF, 300K) of reaction of **1** with Me<sub>3</sub>TACN after 11 days.

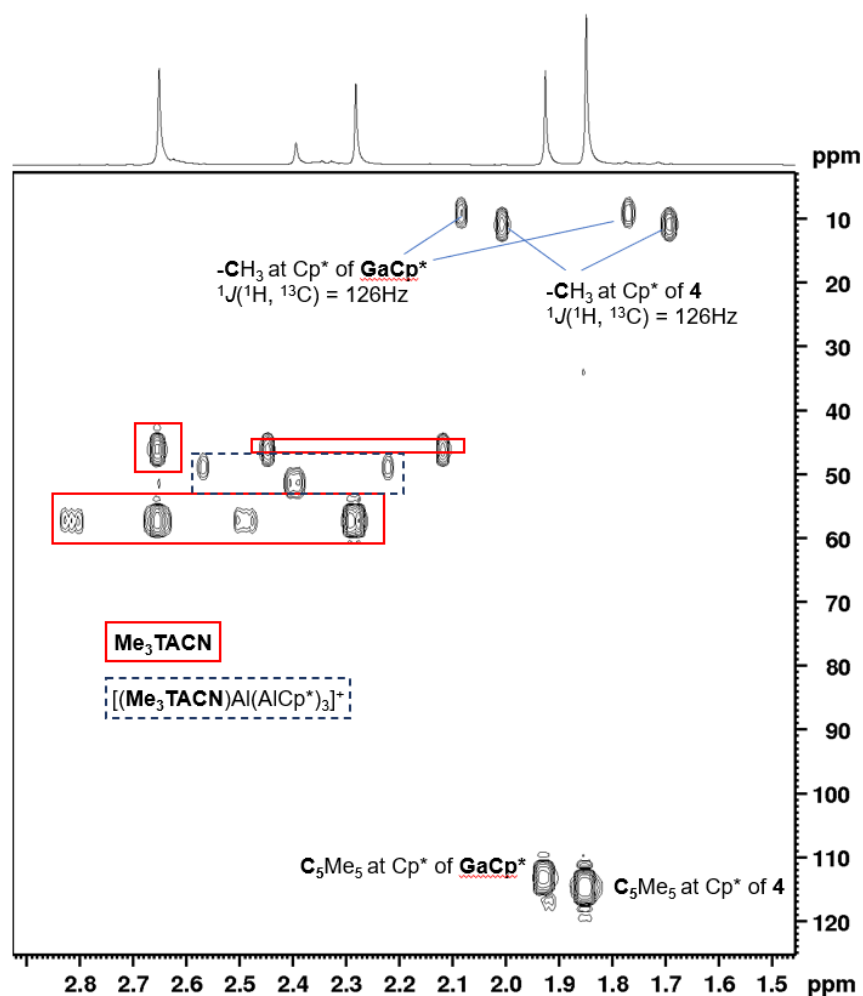

**S-Figure 58:** <sup>1</sup>H-<sup>13</sup>C HMBC spectrum (400.20 MHz, 100.62 MHz, PhF, 300K) of reaction of **1** with Me<sub>3</sub>TACN after 11 days.

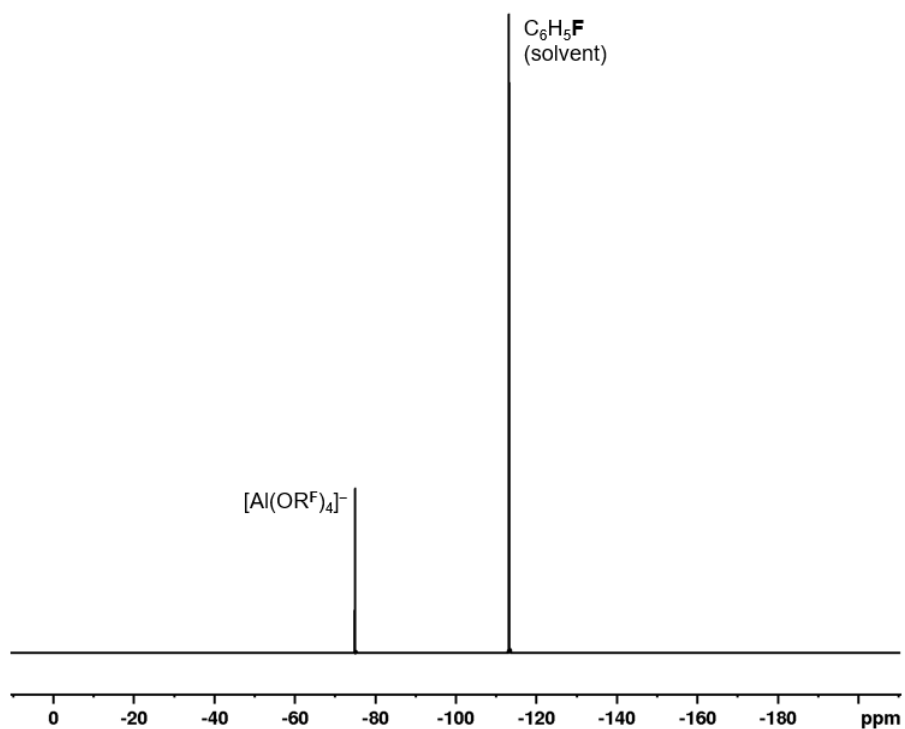

**S-Figure 59:**  $^{11}\text{F}$  NMR spectrum (376.5 MHz, PhF, 300K) of reaction of **1** with  $\text{Me}_3\text{TACN}$  after 11 days.

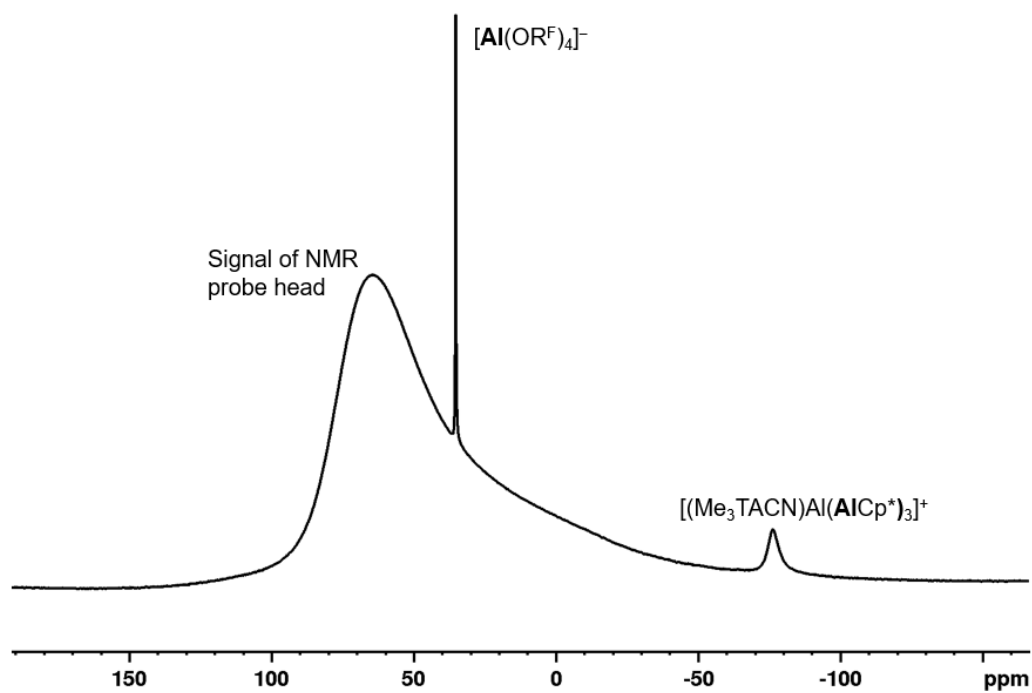

**S-Figure 60:**  $^{27}\text{Al}$  NMR spectrum (104.3 MHz, PhF, 300K) of reaction of **1** with  $\text{Me}_3\text{TACN}$  after 11 days.



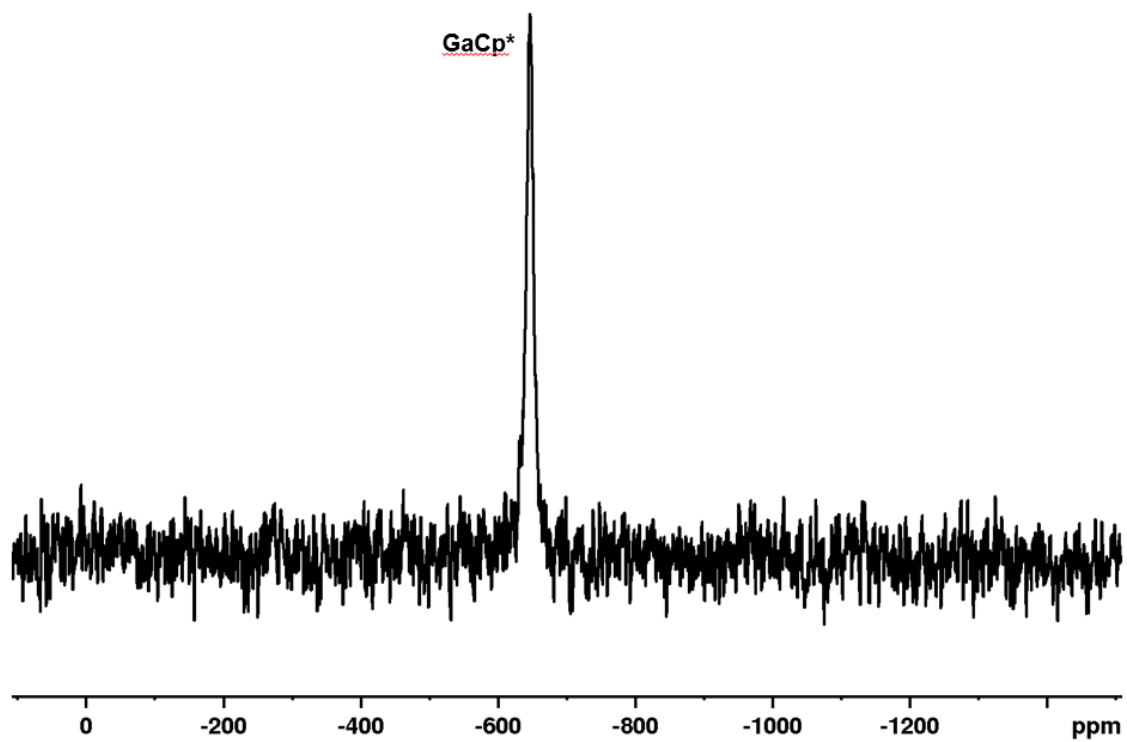

**S-Figure 61:**  $^{71}\text{Ga}$  NMR spectrum (122-04 MHz, PhF, 300K) of reaction of **1** with  $\text{Me}_3\text{TACN}$  after 11 days.

## S-4 Supporting quantum-chemical calculations

### Computational details

Geometry optimizations were performed with the TURBOMOLE software<sup>[12]</sup> (v7.2 or v7.5) using DFT functionals bp86<sup>[13]</sup> with the def2-svp<sup>[14]</sup> basis set, the resolution-of-identity (RI) approximation<sup>[15]</sup>, dispersion correction (d3bj)<sup>[16]</sup>, a fine integration grid (m4 and 5 for NMR) and the default SCF convergence criteria ( $10^{-6}$  a.u.). All structures were checked for imaginary frequencies with the integrated *AOFORCE* module<sup>[17]</sup>. Thermal and entropic contributions to the Gibbs energy were calculated at the bp86-d3bj/def2-svp level of theory without scaling factor at standard conditions with the *FREEH* module. IR and Raman spectra were simulated on bp86-d3bj/def2-svp level without scaling factor and a FWHM of  $10\text{ cm}^{-1}$ . UV/VIS spectra were computed using the *escf* module<sup>[18]</sup> (20 excited states, singlet, with thermal smearing of occ. Numbers (\$fermi)) starting from scXRD or bp96-d3bj/def2-svp structures. Computed NMR shifts were referenced against the experimental magnetic shielding of  $[\text{AlCp}^*]_4$  ( $\delta = -79.9\text{ ppm}$ ).

Gibbs free energies of solvation were calculated with the COSMO-RS model<sup>[19]</sup> at the bp86-d3/def2-tzvpd//bp86-d3/def2-tzvp<sup>[20]</sup> level of theory using the CosmoThermX<sup>[21]</sup> software (v C39\_1501). Single-point calculations with the pbe0<sup>[22]</sup>-d3bj/def2-tzvpp or the b3lyp<sup>[23]</sup>-d3bj/def2tzvpp method were performed based on bp86-d3bj/def2-svp structures using TURBOMOLE.

QTAIM calculations were performed with the MultiWFN program package<sup>[25]</sup> on bp86-d3bj/def2-svp structures. EDA-NOCV analysis<sup>[26]</sup> of the compounds was performed as implemented in the ADF program package (2019.304)<sup>[26]</sup>. All EDA-NOCV calculations were performed on bp86-d3bj/tz2p//bp86-d3bj/def2-svp level of DFT (numerical quality verygood, nosym).

## QTAIM analysis of the cations

In the quantum theory of atoms in molecule analysis (QTAIM), the values computed at bond critical points (BCP) reflect the nature of interactions between the atoms. The most important values for description of the interaction are the electron density  $\rho(r)$  and the Laplacian of the electron density  $\Delta\rho(r)$ . In general, large values of the electron density  $\rho(r)$  indicate a strong bonding interaction. Moreover, a negative  $\Delta\rho(r)$  value is indicative of a covalent, shared-shell interaction<sup>[27]</sup>. The ellipticity of electron density  $\varepsilon$  at the BCP reflects the anisotropy of the curvature of the electron density orthogonal to the bond. Hence,  $\varepsilon$ -values below 0.1 indicate no anisotropy (e.g. in  $\sigma$ -bonds) and values higher than 0.25 are typically calculated for double bonds<sup>[28]</sup>.

The results of the QTAIM analyses of the  $[M(\text{AlCp}^*)_3]^+$  cations are displayed in S-Figure 62. Here, the decrease of the electron densities on the BCPs of the M–Al bonds in the order  $\text{Ga} > \text{In} > \text{Tl}$  reveal the decreasing strength of these bonds. This observation coincides the decreasing wavenumber of the symmetric and asymmetric stretching vibrations in the same order as measured in the Raman spectra of the complexes. Surprisingly, for the In- and Tl-centred complexes, BCPs were computed between the  $\text{AlCp}^*$  atoms, indicating a weak bonding interaction. These interactions most likely result from the poor overlap of the  $\text{AlCp}^*$  lone-pairs and the In/Tl accepting orbitals (see EDA-NOCV). Hence, remaining electron density at the Al-atoms allows for some delocalization as seen in the QTAIM analysis. Yet, the large, experimental, and computational  $\text{AlCp}^*-\text{AlCp}^*$  distances preclude a covalent Al–Al bonding interaction (average., comp. values for  $\text{AlCp}^*-\text{AlCp}^*$  distances: 2.986 Å in  $1^+$ , 3.008 Å  $2^+$ , 3.041 Å in  $3^+$ ).

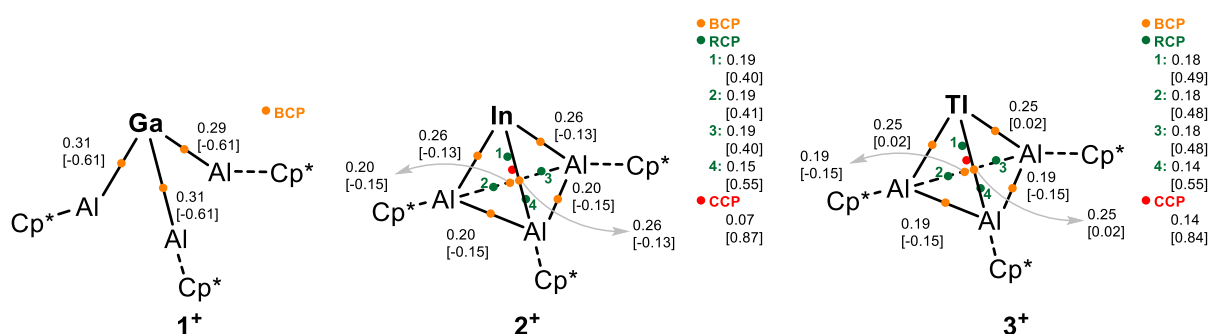

S-Figure 62: QTAIM analyses of the mixed group 13 cations.

## EDA-NOCV of the clusters

EDA-NOCV analysis of the compounds was performed as implemented in the ADF program package. All EDA-NOCV calculations were performed on bp86-d3bj/tz2p//bp86-d3bj/def2-svp level of DFT. In the EDA-NOCV approach, the intrinsic interaction energy ( $\Delta E_{int}$ ) is broken down into the Pauli repulsion  $\Delta E_{Pauli}$ , the quasi-classical electrostatic interaction  $\Delta E_{elstat.}$ , the dispersion energy  $\Delta E_{disp}$  and orbital energy  $\Delta E_{orb}$  as described by equation (2).

$$\Delta E_{int} = \Delta E_{elstat.} + \Delta E_{Pauli} + \Delta E_{disp} + \Delta E_{orb}. \quad (2)$$

Moreover, the orbital interaction term  $\Delta E_{orb}$  is further divided in the NOCV procedure into pairwise contributions  $\Delta E^k_{orb}$ . These  $\Delta E^k_{orb}$  terms can be assigned to plots of deformation density  $\Delta \rho_k(r)$ , which illustrate the orbital contributions to the bonding and the change in electron distribution in the molecule compared to the two fragments. More detailed information on the EDA-NOCV method can be found in recent reviews<sup>[29,30]</sup>. The EDA-NOCV method depends significantly on the charge and multiplicity of the fragments chosen. Here, the fragment combination leading to the lowest  $\Delta E_{orb}$  is considered as the best bonding representation<sup>[30]</sup>. Similar to the previously reported  $[\text{Al}(\text{AlCp}^*)_3]^+$  cation, the  $[\text{M}(\text{AlCp}^*)_3]^+$  clusters are best described via the interaction of a  $\text{M}^+$  cation with a  $(s)^2(p)^0$ -electron configuration with an  $(\text{AlCp}^*)_3$  in its singlet state.

The plots of the deformation densities for the cations of type  $[\text{M}(\text{AlCp}^*)_3]^+$  are displayed in S-Figure 63 and S-Figure 64. As further proven by the detailed analysis of the underlying symmetry-adapted fragment orbitals (SFOs) for  $[\text{Ga}(\text{AlCp}^*)_3]^+$  (S-Figure 63), the major orbital interactions represent the electron donation from the degenerate HOMO/−1 orbitals of the  $(\text{AlCp}^*)_3$  fragment into the empty  $p_x/p_y$ -orbitals at the metal cation. Furthermore, the back-donation from the metal cations lone-pair into the LUMO of the  $(\text{AlCp}^*)_3$  fragment together with s-bonding interaction of the HOMO−8 at the  $(\text{AlCp}^*)_3$  fragment with the metals  $p_z$  orbital are minor interactions. The latter two combine to the plots of deformation density  $\Delta \rho_3$  and  $\Delta \rho_4$ . Interestingly, with lowering of the total magnitude of the orbital interaction in the order of  $\text{Ga}^+ > \text{In}^+ > \text{Tl}^+$ , the relative contributions of the bonding interactions to the total orbital interaction energies remain the same.

S-Table 1: Results of the EDA-NOCV analysis for the interaction of the M<sup>+</sup> atoms (S, electron configuration (s<sup>2</sup>)(p<sup>0</sup>)) with the (AlCp<sup>\*</sup>)<sub>3</sub> fragment (S) in 1<sup>+</sup>. Values are given in kcal/mol

|                            |                                                                                    | [Ga(AlCp <sup>*</sup> ) <sub>3</sub> ] <sup>+</sup> | [In(AlCp <sup>*</sup> ) <sub>3</sub> ] <sup>+</sup> | [Tl(AlCp <sup>*</sup> ) <sub>3</sub> ] <sup>+</sup> |
|----------------------------|------------------------------------------------------------------------------------|-----------------------------------------------------|-----------------------------------------------------|-----------------------------------------------------|
| Energy terms               | Orbital interaction                                                                |                                                     |                                                     |                                                     |
| $\Delta E_{\text{int}}$    |                                                                                    | <b>-131.83</b>                                      | <b>-112.14</b>                                      | <b>-101.95</b>                                      |
| $\Delta E_{\text{Pauli}}$  |                                                                                    | 152.96                                              | 129.70                                              | 127.55                                              |
| $\Delta E_{\text{elstat}}$ |                                                                                    | -99.47                                              | -93.56                                              | -94.65                                              |
| $\Delta E_{\text{Orb}}$    |                                                                                    | -174.59                                             | -135.28                                             | -120.80                                             |
| $\Delta E_{\text{Orb}(1)}$ | (AlCp <sup>*</sup> ) <sub>3</sub> → M <sup>+</sup> (p <sub>y</sub> )<br>π-donation | -56.28 (32%)                                        | -42.46 (32%)                                        | -37.94 (31%)                                        |
| $\Delta E_{\text{Orb}(2)}$ | (AlCp <sup>*</sup> ) <sub>3</sub> → M <sup>+</sup> (p <sub>x</sub> )<br>π-donation | -56.23 (32%)                                        | -42.37 (32%)                                        | -37.85 (31%)                                        |
| $\Delta E_{\text{Orb}(3)}$ | (AlCp <sup>*</sup> ) <sub>3</sub> ⇌ M <sup>+</sup> (s/p <sub>z</sub> ) σ-bonding   | -28.47(16%)                                         | -19.94 (15%)                                        | -19.25 (16%)                                        |
| $\Delta E_{\text{Orb}(4)}$ | (AlCp <sup>*</sup> ) <sub>3</sub> ⇌ M <sup>+</sup> (s/p <sub>z</sub> ) σ-bonding   | -18.47 (11%)                                        | -16.53 (12%)                                        | -11.24 (9%)                                         |
| $\Delta E_{\text{Rest}}$   |                                                                                    | -15.06                                              | -13.98                                              | -14.49                                              |
| $\Delta E_{\text{Disp}}$   |                                                                                    | -10.73                                              | -12.99                                              | -14.06                                              |

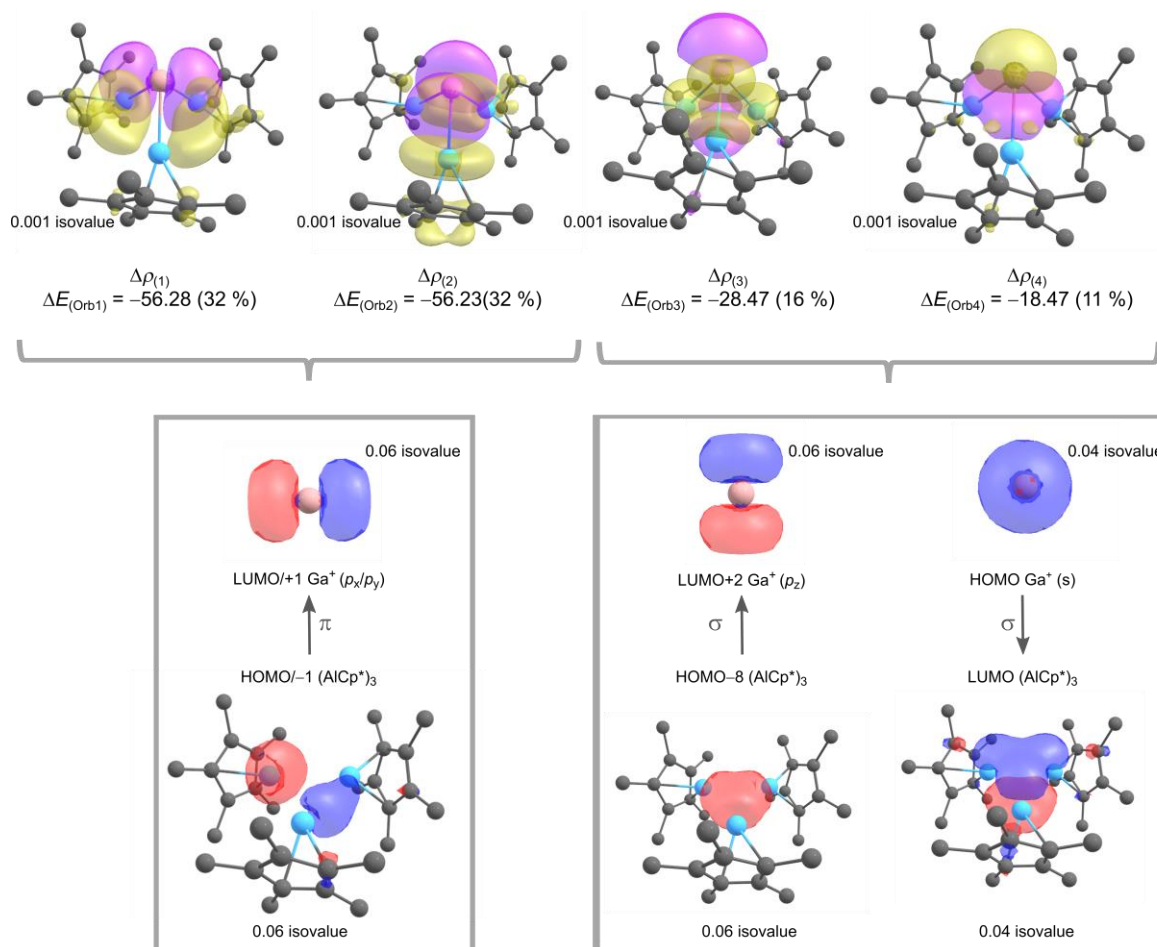

S-Figure 63: Plots of deformation densities  $\Delta\rho_{(1)-(4)}$  of the pairwise orbital interaction in  $1^+$  associated with energy terms  $\Delta E_{\text{Orb}(1)-\text{Orb}(4)}$  (values in kcal/mol) as well as visualization of the underlying fragment orbitals of (AlCp<sup>\*</sup>)<sub>3</sub> and Ga<sup>+</sup>. Charge flows from yellow to purple.

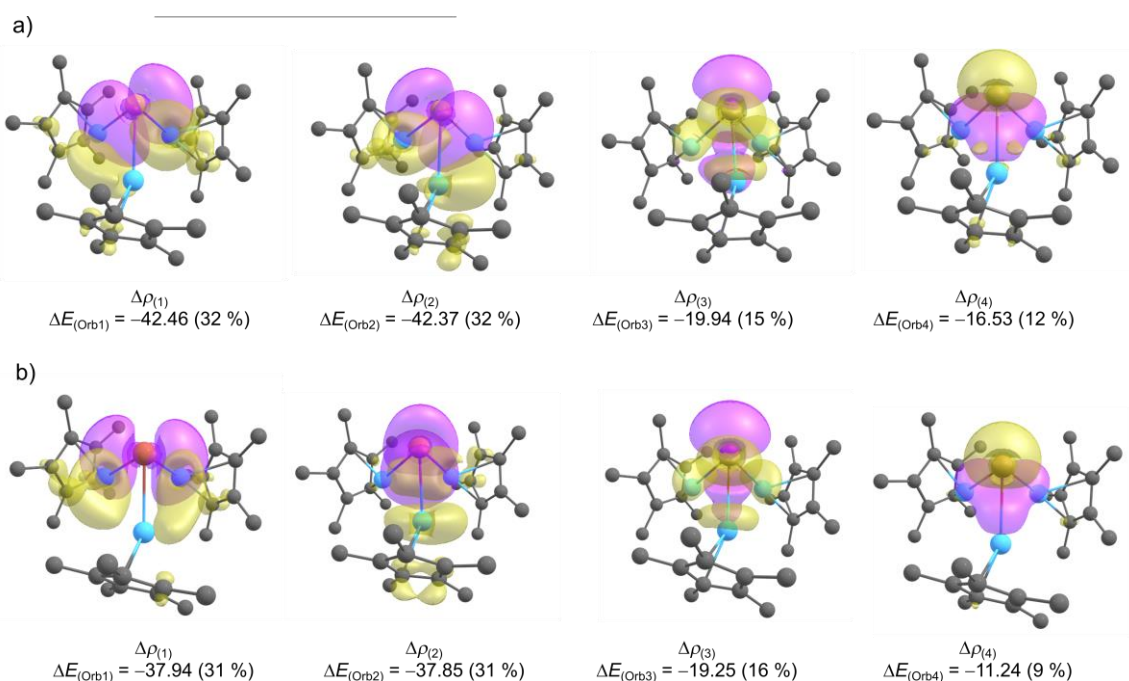

S-Figure 64: Plots of deformation densities  $\Delta\rho_{(1)-(4)}$  of the pairwise orbital interaction in  $2^+$  (a) and  $3^+$  (b) associated with energy terms  $\Delta E_{\text{Orb}(1)-\text{Orb}(4)}$  (values in kcal/mol) (isovalue 0.001). Charge flows from yellow to purple.

## QC analysis of $[\text{Ga}_2(\text{AlCp}^*)_6]$

To study the interaction of the  $[\text{Ga}(\text{AlCp}^*)_3]^+$  cations in the dimer  $[\text{Ga}_2(\text{AlCp}^*)_6]^{2+}$ , QTAIM and EDA-NOCV calculations were performed. In the latter, the dimer-interactions were found to be represented by a weak  $\sigma$ -bonding interaction by double dative interaction of the lone-pair at one Ga atom with the  $p_z$  orbital of the other Ga atom. The  $\sigma$ -bonding nature is further validated by the low computed ellipticities at the BCPs of the Ga–Ga bonds (S-Figure 66). Yet, these interactions are very weak to that extent, that the covalent interaction energies are only slightly larger (short Ga–Ga distance) or even smaller (long Ga–Ga distance) than the dispersion forces.

S-Table 2: Results of the EDA-NOCV analysis for the interaction of two  $[\text{M}(\text{AlCp}^*)_3]^+$  fragments; Values are given in kcal/mol

|                            | Dimer with long $\text{Ga}^+–\text{Ga}^+$ bond<br>(scXRD)                               |                                                                                         | Dimer with short $\text{Ga}^+–\text{Ga}^+$ bond (scXRD)                                 |                                                                                         |
|----------------------------|-----------------------------------------------------------------------------------------|-----------------------------------------------------------------------------------------|-----------------------------------------------------------------------------------------|-----------------------------------------------------------------------------------------|
|                            | $[\text{Ga}(\text{AlCp}^*)_3]^+ (\text{S}) + [\text{Ga}(\text{AlCp}^*)_3]^+ (\text{S})$ | $[\text{Ga}(\text{AlCp}^*)_3]^+ (\text{T}) + [\text{Ga}(\text{AlCp}^*)_3]^+ (\text{T})$ | $[\text{Ga}(\text{AlCp}^*)_3]^+ (\text{S}) + [\text{Ga}(\text{AlCp}^*)_3]^+ (\text{S})$ | $[\text{Ga}(\text{AlCp}^*)_3]^+ (\text{T}) + [\text{Ga}(\text{AlCp}^*)_3]^+ (\text{T})$ |
| Energy terms               |                                                                                         |                                                                                         |                                                                                         |                                                                                         |
| $\Delta E_{\text{int}}$    | <b>13.88</b>                                                                            | <b>-116.98</b>                                                                          | <b>12.73</b>                                                                            | <b>-120.26</b>                                                                          |
| $\Delta E_{\text{Pauli}}$  | 26.05                                                                                   | 49.71                                                                                   | 40.96                                                                                   | 73.52                                                                                   |
| $\Delta E_{\text{elstat}}$ | 24.36                                                                                   | 1.32                                                                                    | 16.35                                                                                   | -20.88                                                                                  |
| $\Delta E_{\text{Orb}}$    | -17.77                                                                                  | -149.24                                                                                 | -25.61                                                                                  | -153.66                                                                                 |
| $\Delta E_{\text{Orb}(1)}$ | -8.17 (46%)                                                                             |                                                                                         | -12.40 (48%)                                                                            |                                                                                         |
| $\Delta E_{\text{Orb}(2)}$ | -2.82 (16%)                                                                             |                                                                                         | -4.87 (10%)                                                                             |                                                                                         |
| $\Delta E_{\text{Rest}}$   | -6.76                                                                                   |                                                                                         | -8.34 (33%)                                                                             |                                                                                         |
| $\Delta E_{\text{Disp}}$   | -18.77                                                                                  | -18.77                                                                                  | -18.96                                                                                  | -18.96                                                                                  |

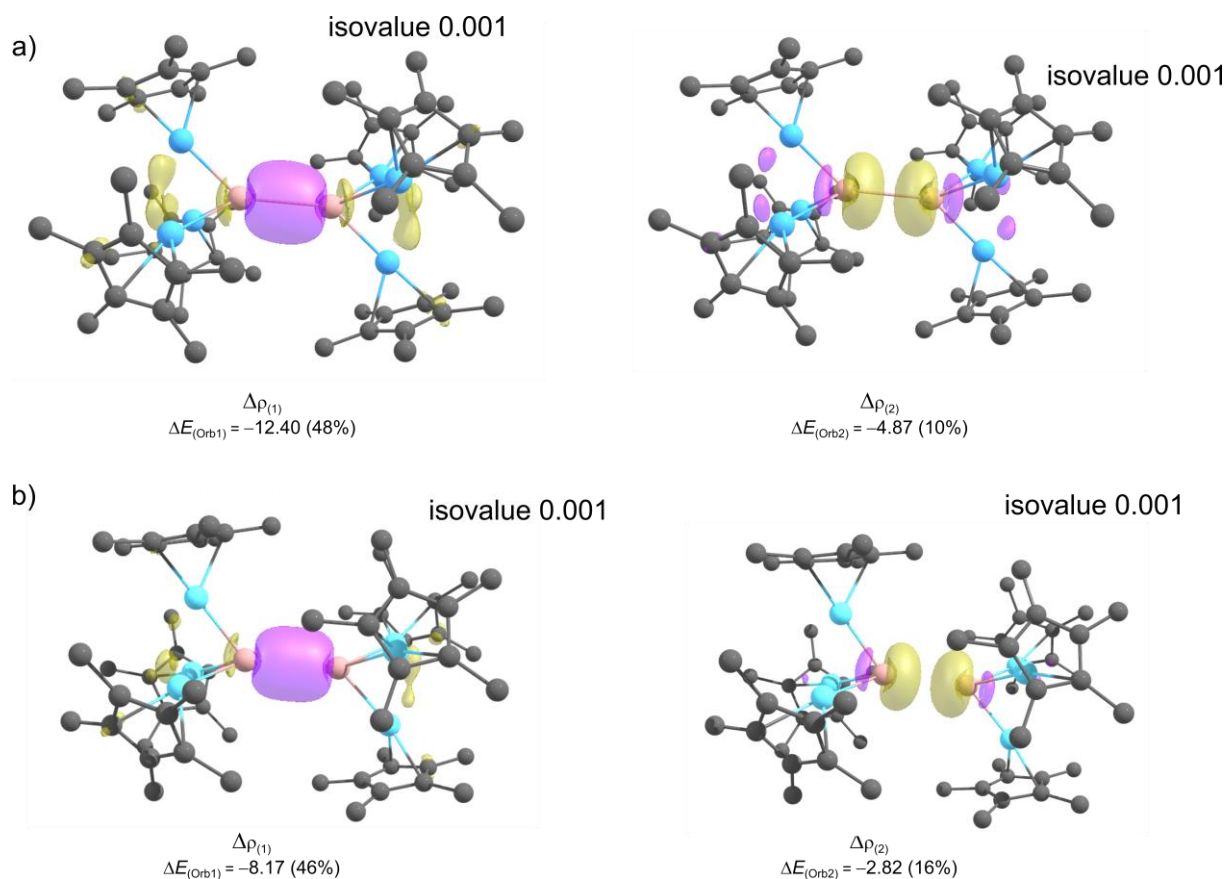

S-Figure 65: Plots of deformation densities  $\Delta\rho_{(1)-(2)}$  of the pairwise orbital interaction in the  $[\text{Ga}_2(\text{AlCp}^*)_6]^{2+}$  dimers with a short (a) and long (b)  $\text{Ga}^+-\text{Ga}^+$  distance. Charge flows from yellow to purple.

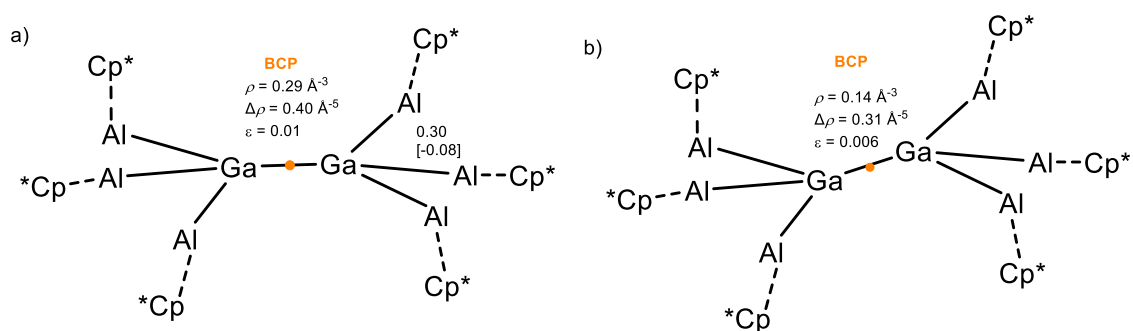

S-Figure 66: Computed electron densities  $\rho(r)$ , Laplacian of the electron density  $\Delta\rho(r)$  and ellipticity  $\varepsilon$  of electron density at the critical points (BCP: bond critical point) of the scXRD structures of  $[\text{Ga}_2(\text{AlCp}^*)_6]^{2+}$  with short (a) and long (b)  $\text{Ga}^+-\text{Ga}^+$  distances.



## Comparison of dimerization for 1<sup>+</sup>, 2<sup>+</sup>, and 3<sup>+</sup>

The comparison of the computed structures of the dimeric  $[M_2(\text{AlCp}^*)_6]^{2+}$  clusters shows a significant change to “slipped”-dimeric structures for the heavier indium- and thallium-centred clusters. These structural changes can be attributed to the significant decrease in orbital overlap between the s-type lone-pair and p<sub>z</sub>-type LUMO of the complexes.

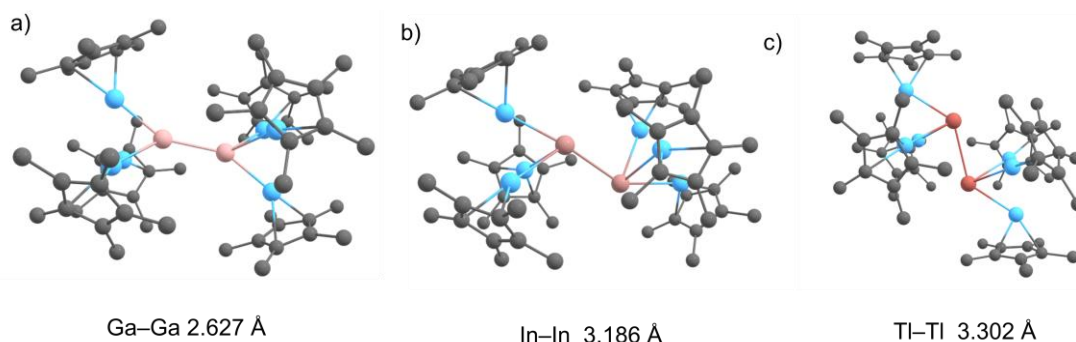

S-Figure 67: Computed gas-phase structures of  $[\text{Ga}_2(\text{AlCp}^*)_6]^{2+}$  (a),  $[\text{In}_2(\text{AlCp}^*)_6]^{2+}$  (b) and  $[\text{Tl}_2(\text{AlCp}^*)_6]^{2+}$  (c).

The thermodynamics of the dimerization of  $[\text{M}(\text{AlCp}^*)_3]^+$  cations ( $\text{M} = \text{Ga}^+, \text{In}^+, \text{Tl}^+$ ) was computed on b3-lyp-d3bj/def2-tzvpp//bp86-d3bj/def2-svp level of DFT. The gas-phase structure of the  $[\text{Ga}_2(\text{AlCp}^*)_6]^{2+}$  dimer was computed with a significant shorter Ga–Ga distance of 2.627 Å which deviates significantly from the values measured in the scXRD structures of 2.860(1) Å and 3.108(1) Å. Hence, the computed thermodynamics most likely do not accurately describe the dimerization observed in the experiment in solution and solid state. Hence, only the  $\Delta(\Delta H^0_{\text{gas}})$  and  $\Delta(\Delta G^0_{\text{gas}})$  for the dimers will be discussed. As expected, the enthalpies and free enthalpies of dimerization become less favourable in the order  $\text{Ga} > \text{In} > \text{Tl}$ .

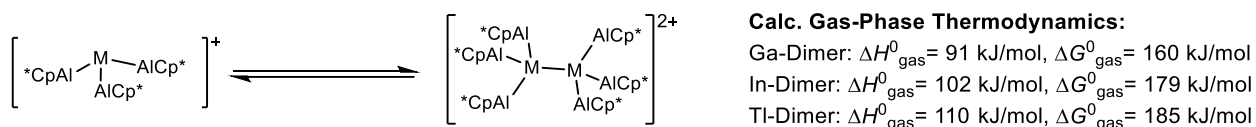

S-Scheme 1: Computed gas-phase thermodynamics for the dimerization of  $[\text{M}(\text{AlCp}^*)_3]^+$ . Values computed at b3-lyp-d3bj/def2-tzvpp//bp86-d3bj/def2-svp level of DFT.<sup>1</sup>

<sup>1</sup> The optimized structure of  $[\text{In}_2(\text{AlCp}^*)_6]^{2+}$  contained a small imaginary frequency of  $-5.33$   $\text{cm}^{-1}$ , which could not be removed despite various changes in the convergence criteria and start structures. Yet, the effect on the computed thermodynamics is negligible.

## Frontier orbitals

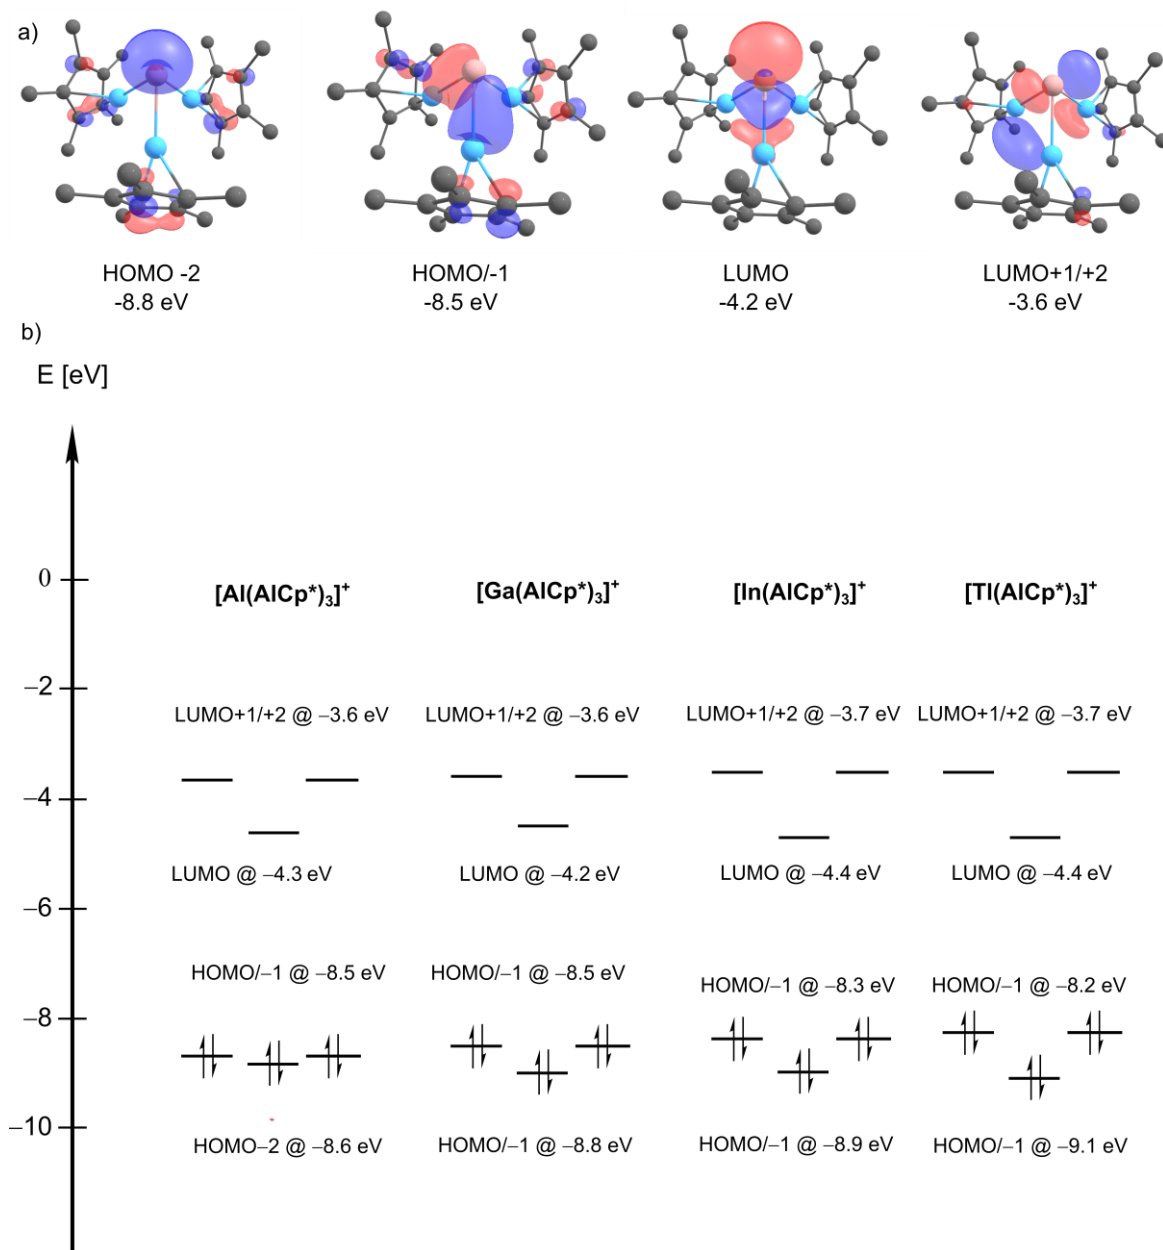

S-Figure 68: a) Kohn-Sham orbitals of  $[\text{Ga}(\text{AlCp}^*)_3]^+$  computed at pbe0-d3bj/def2-tzvpp//bp86-d3bj/def2-svp level of DFT (isovalue 0.05). b) Computed energy levels of frontier orbitals for the cations  $[\text{M}(\text{AlCp}^*)_3]^+$  (pbe0-d3bj/def2-tzvpp//bp86-d3bj/def2-svp).

## Energies

S-Table 3: Thermodynamic data for computed molecules (b3lyp-d3bj/def2-tzvpp//bp86-d3bj/def2-svp).

| Compound                                                                                      | E(SCF) [Eh]  | FreeH Energy [Eh] | FreeH entropy at 298 K [Eh] | COSMO-RS (in PhF) [kcalmol <sup>-1</sup> ] |
|-----------------------------------------------------------------------------------------------|--------------|-------------------|-----------------------------|--------------------------------------------|
| [(AlCp <sup>*</sup> ) <sub>4</sub> ]                                                          | -2529.835157 | 2426.51           | 1.37152                     | -76.5106156                                |
| AlCp <sup>*</sup>                                                                             | -632.4399962 | 600.57            | 0.481                       | -15                                        |
| [(Me <sub>3</sub> TACN)Al(AlCp <sup>*</sup> ) <sub>3</sub> ] <sup>+</sup>                     | -2659.409    | 2654.2            | 1.32835                     | -202.844531                                |
| Me <sub>3</sub> TACN                                                                          | -519.703011  | 807.98            | 0.4746                      | -25                                        |
| GaCp <sup>*</sup>                                                                             | -2314.827134 | 599.08            | 0.49268                     | -12.1002582                                |
| [Ga(AlCp <sup>*</sup> ) <sub>3</sub> ] <sup>+</sup>                                           | -3822.032286 | 1830.15           | 1.18065                     | -161.315915                                |
| [Ga(Me <sub>3</sub> TACN)] <sup>+</sup>                                                       | -2444.372119 | 826.54            | 0.4766                      | -166.865461                                |
| [(Me <sub>3</sub> TACN)Ga(AlCp <sup>*</sup> ) <sub>3</sub> ] <sup>+</sup>                     | -4341.782125 | 2653.1            | 1.36149                     | -192.75364                                 |
| [(Me <sub>3</sub> TACN)Al(GaCp <sup>*</sup> )(AlCp <sup>*</sup> ) <sub>2</sub> ] <sup>+</sup> | -4341.791223 | 2652.12           | 1.35856                     | -205.911341                                |
| TiCp <sup>*</sup>                                                                             | -562.5571331 | 597.52            | 0.50735                     | -13.7432522                                |
| [Ti(AlCp <sup>*</sup> ) <sub>3</sub> ] <sup>+</sup>                                           | -2069.759043 | 1828.89           | 1.20231                     | -163                                       |
| [Ti(Me <sub>3</sub> TACN)] <sup>+</sup>                                                       | -692.1058238 | 824.77            | 0.49836                     | -168.893325                                |
| [(Me <sub>3</sub> TACN)Ti(AlCp <sup>*</sup> ) <sub>3</sub> ] <sup>+</sup>                     | -2589.506147 | 2649.11           | 1.44928                     | -184.894589                                |
| [(Me <sub>3</sub> TACN)Ti(GaCp <sup>*</sup> )(AlCp <sup>*</sup> ) <sub>2</sub> ] <sup>+</sup> | -2589.504314 | 2649.62           | 1.39584                     | -208.01827                                 |

## Optimized structures

[Ga(AlCp\*)<sub>3</sub>]<sup>+</sup>

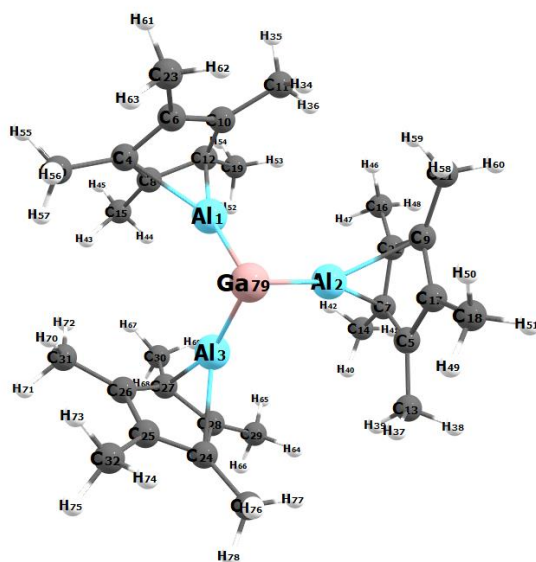

Method: (RI-)BP86(D3BJ)/def2-SVP

Symmetry: c1

Cartesian coordinates in Ångström:

Al -1.7029509 -0.1532539 0.2674911  
Al 1.0852732 -0.1409108 1.3373517  
Al 0.6160494 -0.1431440 -1.6113235  
C -3.8695401 -0.2282552 -0.3205289  
C 3.2338526 0.2327248 1.8492381  
C -3.7286099 -0.8055956 0.9916860  
C 2.4694712 1.4364635 2.0671232  
C -3.4368086 1.1448053 -0.2508155  
C 1.6551312 -0.2128090 3.5092481  
C -3.2175523 0.2089726 1.8773542  
C -2.9465920 0.0247344 3.3415761  
C -3.0286603 1.4166294 1.1115476  
C 4.3698019 0.0550894 0.8852399  
C 2.7054714 2.7776930 1.4363745  
C -3.5261504 2.1635006 -1.3477758  
C 0.5810925 2.1735416 3.7236710  
C 2.7255954 -0.7845986 2.7332737

C 3.2304954 -2.1941234 2.8296956  
C -2.6000571 2.7557694 1.6361181  
C -4.3910855 -0.9324460 -1.5385578  
C 0.8625321 -0.9220903 4.5677342  
C 1.4927456 1.1594478 3.0995783  
C -4.0594878 -2.2176533 1.3760092  
C 2.2110725 -0.1965617 -3.1918781  
C 1.0077204 -0.7747864 -3.7329513  
C -0.0195393 0.2349998 -3.7255344  
C 0.5428893 1.4403230 -3.1673011  
C 1.9274677 1.1719826 -2.8400225  
C 2.9161579 2.1904467 -2.3563399  
C -0.1322735 2.7751989 -3.0474022  
C -1.4213973 0.0498617 -4.2276009  
C 0.8486712 -2.1829663 -4.2257027  
C 3.5297064 -0.8962343 -3.0391719  
H -2.4560632 -0.9468535 3.5518747  
H -3.8905098 0.0482803 3.9250273  
H -2.2958096 0.8261739 3.7390967  
H 4.3159070 -0.9186457 0.3582307  
H 5.3458267 0.0885276 1.4126475  
H 4.3834449 0.8542601 0.1203401  
H 3.2515214 2.6895880 0.4795350  
H 3.3142880 3.4223820 2.1047839  
H 1.7585911 3.3177554 1.2370143  
H -3.4440265 1.7001423 -2.3496328  
H -2.7402724 2.9378472 -1.2602321  
H -4.5052372 2.6864966 -1.3123214  
H -0.3260919 1.7055043 4.1513643  
H 0.2614401 2.9464139 2.9987805  
H 1.0971152 2.6991066 4.5548890  
H 3.6230032 -2.5571379 1.8599541  
H 2.4361585 -2.8936973 3.1544284  
H 4.0566773 -2.2679512 3.5680074  
H -1.9613675 3.3016218 0.9137049  
H -2.0361503 2.6632346 2.5821374  
H -3.4833752 3.3968408 1.8404558  
H -5.5006475 -0.9050328 -1.5664885  
H -4.0897895 -1.9982949 -1.5577978

|                        |                 |             |              |                 |     |        |         |         |         |     |     |
|------------------------|-----------------|-------------|--------------|-----------------|-----|--------|---------|---------|---------|-----|-----|
| H                      | -4.0267636      | -0.4626154  | -2.4718464   | 8               | a   | 19.03  | 0.00610 | YES     | YES     |     |     |
| H                      | 0.6920793       | -1.9860625  | 4.3102098    | 9               | a   | 20.90  | 0.01453 | YES     | YES     |     |     |
| H                      | -0.1263715      | -0.4510747  | 4.7246599    | 10              | a   | 31.88  | 0.00568 | YES     | YES     |     |     |
| H                      | 1.3959577       | -0.9020037  | 5.5412234    | 11              | a   | 34.55  | 0.02087 | YES     | YES     |     |     |
| H                      | -5.1080702      | -2.2942459  | 1.7333714    | 12              | a   | 37.20  | 0.02549 | YES     | YES     |     |     |
| H                      | -3.4068351      | -2.5850266  | 2.1918188    | 13              | a   | 49.00  | 0.04367 | YES     | YES     |     |     |
| H                      | -3.9523414      | -2.9121886  | 0.5205031    | 14              | a   | 50.82  | 0.06740 | YES     | YES     |     |     |
| H                      | 3.7433241       | 1.7247192   | -1.7872399   | 15              | a   | 51.64  | 0.03164 | YES     | YES     |     |     |
| H                      | 2.4423285       | 2.9558118   | -1.7124238   | 16              | a   | 61.55  | 0.21493 | YES     | YES     |     |     |
| H                      | 3.3744233       | 2.7244594   | -3.2154665   | 17              | a   | 66.88  | 0.11379 | YES     | YES     |     |     |
| H                      | -1.2329090      | 2.6768403   | -3.0341155   | 18              | a   | 68.75  | 0.09243 | YES     | YES     |     |     |
| H                      | 0.1301339       | 3.4251848   | -3.9085953   | 19              | a   | 72.05  | 0.02188 | YES     | YES     |     |     |
| H                      | 0.1706144       | 3.3147171   | -2.1281140   | 20              | a   | 78.90  | 0.20373 | YES     | YES     |     |     |
| H                      | -1.8431451      | -0.9293669  | -3.9242661   | 21              | a   | 81.27  | 0.05455 | YES     | YES     |     |     |
| H                      | -1.4536237      | 0.0910296   | -5.3363011   | 22              | a   | 84.44  | 0.31918 | YES     | YES     |     |     |
| H                      | -2.0965731      | 0.8410619   | -3.8507769   | 23              | a   | 88.51  | 0.34979 | YES     | YES     |     |     |
| H                      | -0.1843864      | -2.5547066  | -4.0811721   | 24              | a   | 93.24  | 0.10044 | YES     | YES     |     |     |
| H                      | 1.5331572       | -2.8800901  | -3.7049510   | 25              | a   | 94.50  | 0.03078 | YES     | YES     |     |     |
| H                      | 1.0738005       | -2.2491994  | -5.3110885   | 26              | a   | 98.08  | 0.13642 | YES     | YES     |     |     |
| H                      | 3.4001790       | -1.9647595  | -2.7770925   | 27              | a   | 100.76 | 0.01274 | YES     | YES     |     |     |
| H                      | 4.1533164       | -0.4298776  | -2.2529357   | 28              | a   | 109.33 | 0.69000 | YES     | YES     |     |     |
| H                      | 4.1091686       | -0.8588549  | -3.9855129   | 29              | a   | 110.75 | 0.65261 | YES     | YES     |     |     |
| Ga                     | 0.0077276       | -1.9950930  | -0.0018957   | 30              | a   | 113.21 | 0.13041 | YES     | YES     |     |     |
|                        |                 |             |              | 31              | a   | 123.93 | 0.33518 | YES     | YES     |     |     |
| SCF energy GEOOPT =    | -3821.663251952 | H           |              | 32              | a   | 124.16 | 0.37147 | YES     | YES     |     |     |
| ZPE =                  | 1704.           | kJ/mol      |              | 33              | a   | 135.80 | 0.05448 | YES     | YES     |     |     |
| FREEH energy =         | 1830.15         | kJ/mol      |              | 34              | a   | 138.23 | 0.01217 | YES     | YES     |     |     |
| FREEH entropy =        | 1.18065         | kJ/mol/K    |              | 35              | a   | 144.13 | 0.04898 | YES     | YES     |     |     |
|                        |                 |             |              | 36              | a   | 148.86 | 0.06057 | YES     | YES     |     |     |
| \$vibrational spectrum |                 |             |              | 37              | a   | 152.28 | 0.00075 | YES     | YES     |     |     |
| # mode                 | symmetry        | wave number | IR intensity | selection rules | 38  | a      | 155.31  | 0.02628 | YES     | YES |     |
| #                      | cm**(-1)        | km/mol      | IR           | RAMAN           | 39  | a      | 157.12  | 0.01683 | YES     | YES |     |
| 1                      | -0.00           | 0.00000     | -            | -               | 40  | a      | 163.83  | 0.08110 | YES     | YES |     |
| 2                      | -0.00           | 0.00000     | -            | -               | 41  | a      | 171.18  | 0.23595 | YES     | YES |     |
| 3                      | -0.00           | 0.00000     | -            | -               | 42  | a      | 175.27  | 0.15766 | YES     | YES |     |
| 4                      | -0.00           | 0.00000     | -            | -               | 43  | a      | 187.75  | 1.37746 | YES     | YES |     |
| 5                      | 0.00            | 0.00000     | -            | -               | 44  | a      | 189.03  | 1.36762 | YES     | YES |     |
| 6                      | 0.00            | 0.00000     | -            | -               | 45  | a      | 192.59  | 0.07754 | YES     | YES |     |
| 7                      | a               | 6.78        | 0.01082      | YES             | YES | 46     | a       | 213.49  | 0.27760 | YES | YES |

|    |   |        |           |     |     |     |   |         |         |     |     |
|----|---|--------|-----------|-----|-----|-----|---|---------|---------|-----|-----|
| 47 | a | 228.07 | 0.94008   | YES | YES | 86  | a | 591.76  | 1.06115 | YES | YES |
| 48 | a | 229.70 | 1.06767   | YES | YES | 87  | a | 592.17  | 0.90808 | YES | YES |
| 49 | a | 246.20 | 4.29183   | YES | YES | 88  | a | 604.23  | 0.19692 | YES | YES |
| 50 | a | 252.30 | 7.25160   | YES | YES | 89  | a | 604.43  | 0.10604 | YES | YES |
| 51 | a | 253.14 | 7.26408   | YES | YES | 90  | a | 605.09  | 0.12654 | YES | YES |
| 52 | a | 272.81 | 0.03308   | YES | YES | 91  | a | 796.51  | 2.52528 | YES | YES |
| 53 | a | 273.40 | 0.20723   | YES | YES | 92  | a | 797.84  | 2.90877 | YES | YES |
| 54 | a | 274.10 | 0.27364   | YES | YES | 93  | a | 798.25  | 2.85180 | YES | YES |
| 55 | a | 274.33 | 0.07583   | YES | YES | 94  | a | 801.81  | 6.71017 | YES | YES |
| 56 | a | 276.09 | 0.26735   | YES | YES | 95  | a | 802.07  | 0.99379 | YES | YES |
| 57 | a | 277.27 | 0.20900   | YES | YES | 96  | a | 802.49  | 1.64390 | YES | YES |
| 58 | a | 282.51 | 0.12423   | YES | YES | 97  | a | 922.98  | 0.18527 | YES | YES |
| 59 | a | 284.56 | 1.81087   | YES | YES | 98  | a | 923.72  | 0.28632 | YES | YES |
| 60 | a | 284.81 | 1.72826   | YES | YES | 99  | a | 924.36  | 0.35055 | YES | YES |
| 61 | a | 287.81 | 0.18222   | YES | YES | 100 | a | 925.75  | 0.28642 | YES | YES |
| 62 | a | 289.92 | 1.32348   | YES | YES | 101 | a | 926.19  | 0.25103 | YES | YES |
| 63 | a | 290.84 | 1.10541   | YES | YES | 102 | a | 927.57  | 0.15395 | YES | YES |
| 64 | a | 379.52 | 0.37233   | YES | YES | 103 | a | 988.19  | 5.93467 | YES | YES |
| 65 | a | 380.00 | 10.88434  | YES | YES | 104 | a | 988.62  | 8.31098 | YES | YES |
| 66 | a | 380.66 | 11.29656  | YES | YES | 105 | a | 989.09  | 4.96394 | YES | YES |
| 67 | a | 390.57 | 0.75556   | YES | YES | 106 | a | 992.73  | 6.67750 | YES | YES |
| 68 | a | 394.10 | 1.34990   | YES | YES | 107 | a | 993.46  | 6.10285 | YES | YES |
| 69 | a | 394.38 | 1.76726   | YES | YES | 108 | a | 993.93  | 5.45727 | YES | YES |
| 70 | a | 471.70 | 360.42613 | YES | YES | 109 | a | 995.72  | 0.39885 | YES | YES |
| 71 | a | 472.66 | 360.65502 | YES | YES | 110 | a | 996.59  | 0.24580 | YES | YES |
| 72 | a | 523.23 | 26.29642  | YES | YES | 111 | a | 997.50  | 0.07776 | YES | YES |
| 73 | a | 543.32 | 0.03343   | YES | YES | 112 | a | 998.83  | 0.21021 | YES | YES |
| 74 | a | 544.17 | 0.03609   | YES | YES | 113 | a | 999.38  | 0.22821 | YES | YES |
| 75 | a | 544.53 | 0.02109   | YES | YES | 114 | a | 1000.60 | 0.17120 | YES | YES |
| 76 | a | 544.73 | 0.10226   | YES | YES | 115 | a | 1000.77 | 0.02083 | YES | YES |
| 77 | a | 544.81 | 0.06416   | YES | YES | 116 | a | 1001.45 | 0.49174 | YES | YES |
| 78 | a | 545.26 | 0.14326   | YES | YES | 117 | a | 1001.60 | 0.93557 | YES | YES |
| 79 | a | 546.37 | 0.06519   | YES | YES | 118 | a | 1048.28 | 5.33512 | YES | YES |
| 80 | a | 546.73 | 0.04543   | YES | YES | 119 | a | 1048.73 | 2.90306 | YES | YES |
| 81 | a | 547.27 | 0.02525   | YES | YES | 120 | a | 1049.33 | 3.24328 | YES | YES |
| 82 | a | 588.36 | 6.31620   | YES | YES | 121 | a | 1050.43 | 0.01353 | YES | YES |
| 83 | a | 588.63 | 7.29255   | YES | YES | 122 | a | 1050.61 | 0.48561 | YES | YES |
| 84 | a | 589.67 | 0.79537   | YES | YES | 123 | a | 1051.03 | 0.09963 | YES | YES |
| 85 | a | 591.13 | 1.34444   | YES | YES | 124 | a | 1074.51 | 0.12086 | YES | YES |

|     |   |         |          |     |     |     |   |         |          |     |     |
|-----|---|---------|----------|-----|-----|-----|---|---------|----------|-----|-----|
| 125 | a | 1074.94 | 0.12371  | YES | YES | 164 | a | 1402.91 | 1.83180  | YES | YES |
| 126 | a | 1077.26 | 0.04565  | YES | YES | 165 | a | 1403.37 | 1.85933  | YES | YES |
| 127 | a | 1163.76 | 0.01124  | YES | YES | 166 | a | 1405.56 | 4.97556  | YES | YES |
| 128 | a | 1164.22 | 0.01713  | YES | YES | 167 | a | 1406.09 | 3.08118  | YES | YES |
| 129 | a | 1164.32 | 0.00328  | YES | YES | 168 | a | 1406.83 | 2.28346  | YES | YES |
| 130 | a | 1165.34 | 0.02319  | YES | YES | 169 | a | 1407.49 | 2.53716  | YES | YES |
| 131 | a | 1165.59 | 0.17181  | YES | YES | 170 | a | 1409.65 | 17.80986 | YES | YES |
| 132 | a | 1165.94 | 0.15725  | YES | YES | 171 | a | 1410.02 | 31.17688 | YES | YES |
| 133 | a | 1338.89 | 0.28156  | YES | YES | 172 | a | 1411.31 | 42.69557 | YES | YES |
| 134 | a | 1340.06 | 0.12985  | YES | YES | 173 | a | 1411.79 | 66.63948 | YES | YES |
| 135 | a | 1340.55 | 0.64543  | YES | YES | 174 | a | 1412.74 | 2.38510  | YES | YES |
| 136 | a | 1341.22 | 0.26633  | YES | YES | 175 | a | 1414.42 | 73.70869 | YES | YES |
| 137 | a | 1341.52 | 0.79799  | YES | YES | 176 | a | 1414.62 | 56.15901 | YES | YES |
| 138 | a | 1342.66 | 1.39255  | YES | YES | 177 | a | 1416.81 | 23.14322 | YES | YES |
| 139 | a | 1345.39 | 2.32263  | YES | YES | 178 | a | 1435.14 | 0.59929  | YES | YES |
| 140 | a | 1346.12 | 2.10208  | YES | YES | 179 | a | 1435.67 | 0.63637  | YES | YES |
| 141 | a | 1347.49 | 4.79623  | YES | YES | 180 | a | 1436.46 | 0.28754  | YES | YES |
| 142 | a | 1348.73 | 11.09100 | YES | YES | 181 | a | 1444.37 | 0.02297  | YES | YES |
| 143 | a | 1349.40 | 1.57250  | YES | YES | 182 | a | 1446.14 | 0.14440  | YES | YES |
| 144 | a | 1351.35 | 13.30355 | YES | YES | 183 | a | 1446.61 | 0.13163  | YES | YES |
| 145 | a | 1352.74 | 2.40651  | YES | YES | 184 | a | 1449.82 | 0.03206  | YES | YES |
| 146 | a | 1353.33 | 1.01765  | YES | YES | 185 | a | 1450.02 | 0.03916  | YES | YES |
| 147 | a | 1355.45 | 0.07755  | YES | YES | 186 | a | 1450.79 | 0.17101  | YES | YES |
| 148 | a | 1384.02 | 1.66294  | YES | YES | 187 | a | 1479.69 | 18.06371 | YES | YES |
| 149 | a | 1384.27 | 1.08256  | YES | YES | 188 | a | 1479.91 | 13.42923 | YES | YES |
| 150 | a | 1384.46 | 0.93540  | YES | YES | 189 | a | 1480.09 | 4.04798  | YES | YES |
| 151 | a | 1388.41 | 0.38246  | YES | YES | 190 | a | 1486.99 | 3.02725  | YES | YES |
| 152 | a | 1388.73 | 0.15804  | YES | YES | 191 | a | 1487.31 | 19.85745 | YES | YES |
| 153 | a | 1389.21 | 0.52809  | YES | YES | 192 | a | 1487.43 | 19.76636 | YES | YES |
| 154 | a | 1394.36 | 18.51464 | YES | YES | 193 | a | 2965.64 | 32.73820 | YES | YES |
| 155 | a | 1395.64 | 4.08743  | YES | YES | 194 | a | 2965.87 | 29.49706 | YES | YES |
| 156 | a | 1396.10 | 3.69335  | YES | YES | 195 | a | 2966.17 | 7.41347  | YES | YES |
| 157 | a | 1397.32 | 0.28654  | YES | YES | 196 | a | 2966.26 | 38.98387 | YES | YES |
| 158 | a | 1397.88 | 1.30752  | YES | YES | 197 | a | 2966.41 | 5.29680  | YES | YES |
| 159 | a | 1398.10 | 1.79474  | YES | YES | 198 | a | 2966.65 | 16.16597 | YES | YES |
| 160 | a | 1398.88 | 3.28683  | YES | YES | 199 | a | 2966.76 | 12.53130 | YES | YES |
| 161 | a | 1400.84 | 13.37064 | YES | YES | 200 | a | 2966.82 | 9.56284  | YES | YES |
| 162 | a | 1401.09 | 10.68011 | YES | YES | 201 | a | 2966.95 | 7.99047  | YES | YES |
| 163 | a | 1402.16 | 4.41823  | YES | YES | 202 | a | 2967.54 | 25.48082 | YES | YES |

|     |   |         |          |     |     |
|-----|---|---------|----------|-----|-----|
| 203 | a | 2967.56 | 18.08403 | YES | YES |
| 204 | a | 2967.83 | 26.51411 | YES | YES |
| 205 | a | 2967.86 | 5.59371  | YES | YES |
| 206 | a | 2968.00 | 8.28532  | YES | YES |
| 207 | a | 2968.16 | 11.34067 | YES | YES |
| 208 | a | 3038.92 | 3.20149  | YES | YES |
| 209 | a | 3039.30 | 3.11758  | YES | YES |
| 210 | a | 3039.36 | 2.43674  | YES | YES |
| 211 | a | 3039.48 | 2.46972  | YES | YES |
| 212 | a | 3039.65 | 8.64664  | YES | YES |
| 213 | a | 3039.83 | 10.30085 | YES | YES |
| 214 | a | 3041.05 | 1.79176  | YES | YES |
| 215 | a | 3041.15 | 5.52179  | YES | YES |
| 216 | a | 3041.77 | 5.97306  | YES | YES |
| 217 | a | 3042.12 | 2.92045  | YES | YES |
| 218 | a | 3042.24 | 1.90250  | YES | YES |
| 219 | a | 3042.37 | 2.99738  | YES | YES |
| 220 | a | 3043.67 | 0.17209  | YES | YES |
| 221 | a | 3043.75 | 0.19972  | YES | YES |
| 222 | a | 3043.83 | 0.18223  | YES | YES |
| 223 | a | 3068.57 | 6.39954  | YES | YES |
| 224 | a | 3068.76 | 2.79659  | YES | YES |
| 225 | a | 3068.99 | 7.14348  | YES | YES |
| 226 | a | 3069.03 | 1.66714  | YES | YES |
| 227 | a | 3069.35 | 5.44832  | YES | YES |
| 228 | a | 3069.46 | 2.39735  | YES | YES |
| 229 | a | 3070.87 | 5.74635  | YES | YES |
| 230 | a | 3071.16 | 5.69489  | YES | YES |
| 231 | a | 3071.45 | 5.08322  | YES | YES |
| 232 | a | 3072.18 | 8.29691  | YES | YES |
| 233 | a | 3072.31 | 10.99669 | YES | YES |
| 234 | a | 3072.97 | 9.86484  | YES | YES |
| 235 | a | 3082.59 | 3.76844  | YES | YES |
| 236 | a | 3083.38 | 3.79974  | YES | YES |
| 237 | a | 3083.72 | 4.40870  | YES | YES |

\$end



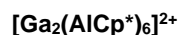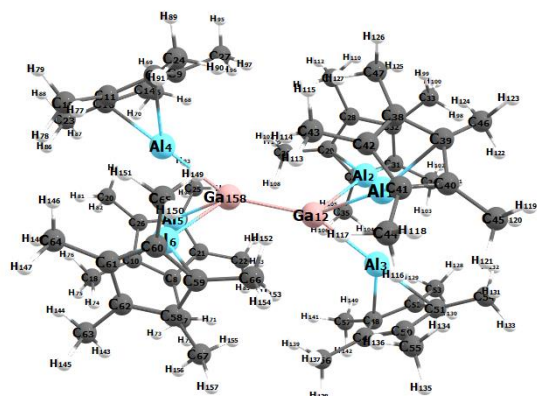

Method: (RI-)BP86(D3BJ)/def2-SVP

Symmetry: c1

Cartesian coordinates in Ångström:

Al 3.1053937 0.1926431 -1.7077904  
 Al 2.8952540 -1.7242699 0.5157352  
 Al 3.3701596 1.1252726 1.0508621  
 Al -3.3700947 -1.1271012 -1.0659406  
 Al -3.1128171 -0.2047672 1.6980144  
 Al -2.8985855 1.7208224 -0.5188383  
 C -3.5667398 -2.1403447 -3.0586996  
 C -3.1493136 1.0134367 3.5690910  
 C -3.1665206 -3.1191432 -2.0809619  
 C -4.4908295 0.6154502 3.2256134  
 C -4.8467219 -1.6114469 -2.6595418  
 Ga 1.3004448 0.1665591 0.0297373  
 C -3.2399570 -1.3164474 3.6490147  
 C -4.1940328 -3.2009792 -1.0754278  
 C -4.1809673 -4.1090986 0.1187764  
 C -5.2354154 -2.2651280 -1.4269894  
 C -2.6156297 2.4124374 3.6509693  
 C -5.6527735 1.5223622 2.9485424  
 C -5.6976325 -0.6559378 -3.4406443  
 C -5.7822333 -1.6657359 3.1149742  
 C -2.3804934 -0.1761847 3.8313743  
 C -0.9245836 -0.1831260 4.2009819

C -6.5370861 -2.0645770 -0.7088778  
 C -2.7912438 -1.7678355 -4.2879463  
 C -2.8885887 -2.7590041 3.8677989  
 C -4.5459588 -0.8308166 3.2690661  
 C -1.8985930 -3.9179866 -2.1159187  
 C 2.3527099 -3.9078342 0.3735169  
 C 1.7494504 -3.3523222 1.5554452  
 C 2.7994631 -2.8891607 2.4252571  
 C 4.0598653 -3.1375968 1.7719064  
 C 3.7817238 -3.7667181 0.4943904  
 C 4.8208992 -4.3203255 -0.4350804  
 C 5.4321034 -2.9251351 2.3395420  
 C 2.5883237 -2.2398129 3.7614855  
 C 0.2778708 -3.2674180 1.8339832  
 C 1.6055021 -4.5410082 -0.7616082  
 C 3.1394267 -1.0223612 -3.5807958  
 C 4.4815630 -0.6258240 -3.2379342  
 C 4.5375802 0.8204614 -3.2790138  
 C 3.2316636 1.3075856 -3.6571366  
 C 2.3712016 0.1682377 -3.8404884  
 C 0.9149322 0.1767985 -4.2086124  
 C 2.8811013 2.7509378 -3.8722768  
 C 5.7743013 1.6544831 -3.1233839  
 C 5.6432855 -1.5339029 -2.9637911  
 C 2.6049715 -2.4209011 -3.6652902  
 C 3.5650607 2.1364373 3.0449358  
 C 3.1649686 3.1161459 2.0680950  
 C 4.1930216 3.1996562 1.0632671  
 C 5.2346470 2.2638277 1.4144190  
 C 4.8454737 1.6086063 2.6460144  
 C 5.6959875 0.6518508 3.4260052  
 C 6.5373001 2.0653871 0.6974650  
 C 4.1809963 4.1099106 -0.1293333  
 C 1.8964092 3.9139430 2.1034198  
 C 2.7882193 1.7616120 4.2725873  
 C -2.3569114 3.9045506 -0.3785474  
 C -1.7538614 3.3483735 -1.5602922  
 C -2.8040454 2.8842529 -2.4294087  
 C -4.0642902 3.1326785 -1.7758178

|   |            |            |            |   |            |            |            |
|---|------------|------------|------------|---|------------|------------|------------|
| C | -3.7859596 | 3.7628193  | -0.4988591 | H | 6.1415643  | -2.5315666 | 1.5849574  |
| C | -4.8249939 | 4.3175388  | 0.4300964  | H | 5.8498627  | -3.8852247 | 2.7085650  |
| C | -5.4366476 | 2.9188979  | -2.3426694 | H | 5.4204755  | -2.2228551 | 3.1919841  |
| C | -2.5930300 | 2.2335364  | -3.7650174 | H | 3.5327049  | -1.8340454 | 4.1694879  |
| C | -0.2823478 | 3.2634393  | -1.8393787 | H | 2.1964105  | -2.9680612 | 4.5010313  |
| C | -1.6097286 | 4.5396053  | 0.7555675  | H | 1.8610981  | -1.4040913 | 3.7012578  |
| H | -3.1621594 | -4.2206901 | 0.5409424  | H | -0.3162402 | -3.2457533 | 0.8994116  |
| H | -4.5396137 | -5.1246405 | -0.1491851 | H | 0.0234271  | -2.3526575 | 2.4031532  |
| H | -4.8405302 | -3.7317577 | 0.9231223  | H | -0.0671968 | -4.1398380 | 2.4283873  |
| H | -1.6254807 | 2.5038862  | 3.1601153  | H | 2.2643217  | -4.7472302 | -1.6244574 |
| H | -2.4926739 | 2.7300236  | 4.7075193  | H | 0.7752712  | -3.8986768 | -1.1160491 |
| H | -3.2985131 | 3.1364729  | 3.1687663  | H | 1.1615962  | -5.5085077 | -0.4476921 |
| H | -5.3216490 | 2.5122897  | 2.5846418  | H | 0.5639213  | 1.1970132  | -4.4502373 |
| H | -6.2462414 | 1.6917459  | 3.8712875  | H | 0.2759125  | -0.2129993 | -3.3858858 |
| H | -6.3400033 | 1.0962078  | 2.1915690  | H | 0.7280002  | -0.4556338 | -5.1000660 |
| H | -5.0892185 | 0.0032695  | -4.0887833 | H | 3.2528612  | 3.3967135  | -3.0520694 |
| H | -6.3170379 | -0.0172157 | -2.7829460 | H | 1.7885545  | 2.9007285  | -3.9457342 |
| H | -6.3926327 | -1.2121211 | -4.1043395 | H | 3.3322729  | 3.1276243  | -4.8137262 |
| H | -5.5508863 | -2.6849877 | 2.7501854  | H | 6.2867056  | 1.7713235  | -4.1017155 |
| H | -6.5115796 | -1.2060658 | 2.4211700  | H | 6.5026564  | 1.1940188  | -2.4290397 |
| H | -6.2935738 | -1.7823089 | 4.0938828  | H | 5.5430902  | 2.6736146  | -2.7581615 |
| H | -0.2851618 | 0.2070944  | 3.3787644  | H | 6.3312751  | -1.1097905 | -2.2063630 |
| H | -0.5727599 | -1.2028644 | 4.4433973  | H | 6.2360011  | -1.7013642 | -3.8873678 |
| H | -0.7392234 | 0.4498819  | 5.0923666  | H | 5.3120297  | -2.5245291 | -2.6019600 |
| H | -6.8793719 | -1.0121927 | -0.7561196 | H | 3.2874321  | -3.1462686 | -3.1845210 |
| H | -6.4650051 | -2.3502245 | 0.3567440  | H | 2.4818819  | -2.7363670 | -4.7224492 |
| H | -7.3348026 | -2.6887795 | -1.1634251 | H | 1.6147709  | -2.5127578 | -3.1746768 |
| H | -2.9752499 | -2.4943060 | -5.1070655 | H | 6.3145016  | 0.0130315  | 2.7675624  |
| H | -1.6996035 | -1.7594832 | -4.0972378 | H | 5.0872239  | -0.0073325 | 4.0738008  |
| H | -3.0746097 | -0.7677367 | -4.6663906 | H | 6.3917638  | 1.2068637  | 4.0898502  |
| H | -1.7956318 | -2.9092600 | 3.9338407  | H | 6.4663797  | 2.3527975  | -0.3677576 |
| H | -3.2669318 | -3.4080106 | 3.0532491  | H | 6.8803554  | 1.0132027  | 0.7433995  |
| H | -3.3330393 | -3.1312805 | 4.8142051  | H | 7.3339835  | 2.6894168  | 1.1540789  |
| H | -2.0127869 | -4.8189063 | -2.7547045 | H | 4.8392259  | 3.7327695  | -0.9348870 |
| H | -1.6092273 | -4.2678188 | -1.1066787 | H | 4.5419535  | 5.1242138  | 0.1402581  |
| H | -1.0557781 | -3.3284465 | -2.5289921 | H | 3.1621320  | 4.2245007  | -0.5505149 |
| H | 5.7272628  | -3.6862233 | -0.4727382 | H | 1.6088800  | 4.2674178  | 1.0949320  |
| H | 4.4378351  | -4.4333241 | -1.4672006 | H | 2.0085300  | 4.8124774  | 2.7459155  |
| H | 5.1433362  | -5.3277253 | -0.0969309 | H | 1.0532120  | 3.3221219  | 2.5124811  |

|                                                          |            |            |            |  |  |    |   |        |          |     |     |
|----------------------------------------------------------|------------|------------|------------|--|--|----|---|--------|----------|-----|-----|
| H                                                        | 3.0742533  | 0.7626275  | 4.6518598  |  |  | 12 | a | 22.13  | 0.03976  | YES | YES |
| H                                                        | 1.6970251  | 1.7493182  | 4.0794388  |  |  | 13 | a | 23.27  | 0.00836  | YES | YES |
| H                                                        | 2.9678156  | 2.4889274  | 5.0919124  |  |  | 14 | a | 26.48  | 0.06838  | YES | YES |
| H                                                        | -4.4426083 | 4.4297966  | 1.4625636  |  |  | 15 | a | 28.55  | 0.04779  | YES | YES |
| H                                                        | -5.7322789 | 3.6847063  | 0.4668044  |  |  | 16 | a | 29.88  | 0.08825  | YES | YES |
| H                                                        | -5.1457755 | 5.3254800  | 0.0919664  |  |  | 17 | a | 30.34  | 0.00970  | YES | YES |
| H                                                        | -5.4247623 | 2.2164216  | -3.1949544 |  |  | 18 | a | 35.36  | 0.00557  | YES | YES |
| H                                                        | -5.8555093 | 3.8785094  | -2.7116810 |  |  | 19 | a | 35.96  | 0.81001  | YES | YES |
| H                                                        | -6.1453455 | 2.5247848  | -1.5876291 |  |  | 20 | a | 39.64  | 0.01913  | YES | YES |
| H                                                        | -1.8676243 | 1.3962730  | -3.7034989 |  |  | 21 | a | 41.77  | 0.00004  | YES | YES |
| H                                                        | -2.1988637 | 2.9604370  | -4.5046949 |  |  | 22 | a | 44.08  | 0.00004  | YES | YES |
| H                                                        | -3.5379050 | 1.8294519  | -4.1735693 |  |  | 23 | a | 45.48  | 0.05819  | YES | YES |
| H                                                        | -0.0278245 | 2.3475304  | -2.4067277 |  |  | 24 | a | 45.73  | 0.00359  | YES | YES |
| H                                                        | 0.3122105  | 3.2439718  | -0.9050458 |  |  | 25 | a | 55.06  | 0.07657  | YES | YES |
| H                                                        | 0.0621165  | 4.1346935  | -2.4358472 |  |  | 26 | a | 55.17  | 0.00217  | YES | YES |
| H                                                        | -0.7781581 | 3.8988661  | 1.1097312  |  |  | 27 | a | 56.47  | 0.28492  | YES | YES |
| H                                                        | -2.2681385 | 4.7454702  | 1.6188295  |  |  | 28 | a | 57.93  | 3.26021  | YES | YES |
| H                                                        | -1.1675857 | 5.5075732  | 0.4405690  |  |  | 29 | a | 62.20  | 0.00094  | YES | YES |
| Ga                                                       | -1.3039303 | -0.1709901 | -0.0354580 |  |  | 30 | a | 68.12  | 1.90464  | YES | YES |
|                                                          |            |            |            |  |  | 31 | a | 68.88  | 0.00215  | YES | YES |
| SCF energy GEOOPT = -7643.312863159 H                    |            |            |            |  |  | 32 | a | 69.37  | 0.03903  | YES | YES |
| ZPE = 3413. kJ/mol                                       |            |            |            |  |  | 33 | a | 71.06  | 11.64932 | YES | YES |
| FREEH energy = 3668.03 kJ/mol                            |            |            |            |  |  | 34 | a | 73.71  | 0.01275  | YES | YES |
| FREEH entropy = 2.13217 kJ/mol/K                         |            |            |            |  |  | 35 | a | 78.15  | 0.01936  | YES | YES |
|                                                          |            |            |            |  |  | 36 | a | 79.50  | 2.92883  | YES | YES |
| \$vibrational spectrum                                   |            |            |            |  |  | 37 | a | 88.45  | 1.49394  | YES | YES |
| # mode symmetry wave number IR intensity selection rules |            |            |            |  |  | 38 | a | 88.97  | 1.34552  | YES | YES |
| # cm**(-1) km/mol IR RAMAN                               |            |            |            |  |  | 39 | a | 91.33  | 2.25674  | YES | YES |
| 1 -0.00 0.00000 - -                                      |            |            |            |  |  | 40 | a | 92.52  | 0.00134  | YES | YES |
| 2 0.00 0.00000 - -                                       |            |            |            |  |  | 41 | a | 94.48  | 0.01109  | YES | YES |
| 3 0.00 0.00000 - -                                       |            |            |            |  |  | 42 | a | 95.42  | 0.38208  | YES | YES |
| 4 0.00 0.00000 - -                                       |            |            |            |  |  | 43 | a | 98.89  | 0.34153  | YES | YES |
| 5 0.00 0.00000 - -                                       |            |            |            |  |  | 44 | a | 99.76  | 0.03647  | YES | YES |
| 6 0.00 0.00000 - -                                       |            |            |            |  |  | 45 | a | 102.38 | 0.12135  | YES | YES |
| 7 a 6.05 0.01304 YES YES                                 |            |            |            |  |  | 46 | a | 102.64 | 1.35348  | YES | YES |
| 8 a 13.57 0.00013 YES YES                                |            |            |            |  |  | 47 | a | 103.93 | 0.46879  | YES | YES |
| 9 a 15.34 0.04671 YES YES                                |            |            |            |  |  | 48 | a | 104.17 | 0.74343  | YES | YES |
| 10 a 16.67 0.00021 YES YES                               |            |            |            |  |  | 49 | a | 108.09 | 1.27694  | YES | YES |
| 11 a 20.77 0.13966 YES YES                               |            |            |            |  |  | 50 | a | 108.51 | 0.48857  | YES | YES |

|     |   |        |          |     |     |  |  |  |  |  |  |
|-----|---|--------|----------|-----|-----|--|--|--|--|--|--|
| 51  | a | 109.92 | 1.22735  | YES | YES |  |  |  |  |  |  |
| 52  | a | 111.54 | 0.05456  | YES | YES |  |  |  |  |  |  |
| 53  | a | 111.79 | 0.37384  | YES | YES |  |  |  |  |  |  |
| 54  | a | 114.16 | 0.00910  | YES | YES |  |  |  |  |  |  |
| 55  | a | 120.73 | 0.07861  | YES | YES |  |  |  |  |  |  |
| 56  | a | 121.45 | 5.77454  | YES | YES |  |  |  |  |  |  |
| 57  | a | 122.53 | 0.02613  | YES | YES |  |  |  |  |  |  |
| 58  | a | 124.26 | 0.85373  | YES | YES |  |  |  |  |  |  |
| 59  | a | 127.89 | 0.00332  | YES | YES |  |  |  |  |  |  |
| 60  | a | 128.87 | 1.62316  | YES | YES |  |  |  |  |  |  |
| 61  | a | 131.28 | 0.00089  | YES | YES |  |  |  |  |  |  |
| 62  | a | 135.03 | 0.90831  | YES | YES |  |  |  |  |  |  |
| 63  | a | 135.77 | 0.33481  | YES | YES |  |  |  |  |  |  |
| 64  | a | 136.48 | 0.00133  | YES | YES |  |  |  |  |  |  |
| 65  | a | 137.39 | 1.18148  | YES | YES |  |  |  |  |  |  |
| 66  | a | 141.83 | 0.02396  | YES | YES |  |  |  |  |  |  |
| 67  | a | 142.98 | 0.43077  | YES | YES |  |  |  |  |  |  |
| 68  | a | 144.95 | 0.02847  | YES | YES |  |  |  |  |  |  |
| 69  | a | 148.73 | 2.20462  | YES | YES |  |  |  |  |  |  |
| 70  | a | 150.12 | 0.07164  | YES | YES |  |  |  |  |  |  |
| 71  | a | 152.46 | 0.00249  | YES | YES |  |  |  |  |  |  |
| 72  | a | 152.98 | 5.59160  | YES | YES |  |  |  |  |  |  |
| 73  | a | 153.93 | 0.04667  | YES | YES |  |  |  |  |  |  |
| 74  | a | 155.15 | 0.42656  | YES | YES |  |  |  |  |  |  |
| 75  | a | 156.25 | 0.01653  | YES | YES |  |  |  |  |  |  |
| 76  | a | 158.45 | 0.00135  | YES | YES |  |  |  |  |  |  |
| 77  | a | 160.11 | 0.07250  | YES | YES |  |  |  |  |  |  |
| 78  | a | 167.83 | 1.85418  | YES | YES |  |  |  |  |  |  |
| 79  | a | 168.03 | 0.35942  | YES | YES |  |  |  |  |  |  |
| 80  | a | 171.57 | 0.04860  | YES | YES |  |  |  |  |  |  |
| 81  | a | 171.69 | 0.07928  | YES | YES |  |  |  |  |  |  |
| 82  | a | 173.91 | 0.00048  | YES | YES |  |  |  |  |  |  |
| 83  | a | 175.36 | 0.64794  | YES | YES |  |  |  |  |  |  |
| 84  | a | 181.52 | 0.00012  | YES | YES |  |  |  |  |  |  |
| 85  | a | 189.11 | 1.99294  | YES | YES |  |  |  |  |  |  |
| 86  | a | 189.88 | 0.01363  | YES | YES |  |  |  |  |  |  |
| 87  | a | 190.67 | 2.44507  | YES | YES |  |  |  |  |  |  |
| 88  | a | 190.88 | 0.10057  | YES | YES |  |  |  |  |  |  |
| 89  | a | 193.40 | 5.38766  | YES | YES |  |  |  |  |  |  |
| 90  | a | 194.18 | 0.01749  | YES | YES |  |  |  |  |  |  |
| 91  | a | 209.07 | 65.30863 | YES | YES |  |  |  |  |  |  |
| 92  | a | 216.22 | 0.00037  | YES | YES |  |  |  |  |  |  |
| 93  | a | 224.74 | 0.00048  | YES | YES |  |  |  |  |  |  |
| 94  | a | 227.40 | 3.86910  | YES | YES |  |  |  |  |  |  |
| 95  | a | 228.42 | 2.28995  | YES | YES |  |  |  |  |  |  |
| 96  | a | 230.57 | 0.00026  | YES | YES |  |  |  |  |  |  |
| 97  | a | 246.35 | 0.02699  | YES | YES |  |  |  |  |  |  |
| 98  | a | 247.30 | 94.83544 | YES | YES |  |  |  |  |  |  |
| 99  | a | 251.14 | 0.00052  | YES | YES |  |  |  |  |  |  |
| 100 | a | 252.69 | 15.55453 | YES | YES |  |  |  |  |  |  |
| 101 | a | 254.27 | 7.71421  | YES | YES |  |  |  |  |  |  |
| 102 | a | 262.65 | 0.00039  | YES | YES |  |  |  |  |  |  |
| 103 | a | 265.19 | 2.00149  | YES | YES |  |  |  |  |  |  |
| 104 | a | 266.90 | 0.05345  | YES | YES |  |  |  |  |  |  |
| 105 | a | 267.29 | 1.71283  | YES | YES |  |  |  |  |  |  |
| 106 | a | 268.31 | 0.00601  | YES | YES |  |  |  |  |  |  |
| 107 | a | 268.90 | 0.24871  | YES | YES |  |  |  |  |  |  |
| 108 | a | 269.16 | 0.04336  | YES | YES |  |  |  |  |  |  |
| 109 | a | 274.87 | 0.37348  | YES | YES |  |  |  |  |  |  |
| 110 | a | 275.38 | 0.00357  | YES | YES |  |  |  |  |  |  |
| 111 | a | 276.73 | 0.06621  | YES | YES |  |  |  |  |  |  |
| 112 | a | 276.93 | 1.50815  | YES | YES |  |  |  |  |  |  |
| 113 | a | 277.29 | 2.88855  | YES | YES |  |  |  |  |  |  |
| 114 | a | 277.86 | 0.02372  | YES | YES |  |  |  |  |  |  |
| 115 | a | 282.01 | 3.32949  | YES | YES |  |  |  |  |  |  |
| 116 | a | 282.45 | 0.06472  | YES | YES |  |  |  |  |  |  |
| 117 | a | 283.81 | 0.00061  | YES | YES |  |  |  |  |  |  |
| 118 | a | 284.39 | 2.41387  | YES | YES |  |  |  |  |  |  |
| 119 | a | 286.04 | 8.48496  | YES | YES |  |  |  |  |  |  |
| 120 | a | 286.58 | 0.06420  | YES | YES |  |  |  |  |  |  |
| 121 | a | 288.65 | 0.00124  | YES | YES |  |  |  |  |  |  |
| 122 | a | 289.24 | 1.57789  | YES | YES |  |  |  |  |  |  |
| 123 | a | 290.28 | 1.78430  | YES | YES |  |  |  |  |  |  |
| 124 | a | 290.84 | 0.00007  | YES | YES |  |  |  |  |  |  |
| 125 | a | 292.20 | 0.01565  | YES | YES |  |  |  |  |  |  |
| 126 | a | 292.41 | 1.99741  | YES | YES |  |  |  |  |  |  |
| 127 | a | 375.04 | 0.09996  | YES | YES |  |  |  |  |  |  |
| 128 | a | 375.84 | 13.03411 | YES | YES |  |  |  |  |  |  |

|     |   |        |           |     |     |     |   |        |          |     |     |
|-----|---|--------|-----------|-----|-----|-----|---|--------|----------|-----|-----|
| 129 | a | 378.51 | 14.32914  | YES | YES | 168 | a | 589.75 | 16.65485 | YES | YES |
| 130 | a | 378.74 | 0.46333   | YES | YES | 169 | a | 590.61 | 9.86983  | YES | YES |
| 131 | a | 381.56 | 15.31683  | YES | YES | 170 | a | 590.82 | 0.00172  | YES | YES |
| 132 | a | 381.67 | 0.59232   | YES | YES | 171 | a | 591.92 | 0.13326  | YES | YES |
| 133 | a | 389.87 | 9.63115   | YES | YES | 172 | a | 592.06 | 1.97261  | YES | YES |
| 134 | a | 390.22 | 0.06225   | YES | YES | 173 | a | 592.13 | 8.07731  | YES | YES |
| 135 | a | 392.87 | 0.10798   | YES | YES | 174 | a | 593.45 | 0.00063  | YES | YES |
| 136 | a | 393.09 | 7.03859   | YES | YES | 175 | a | 602.78 | 0.97487  | YES | YES |
| 137 | a | 397.76 | 0.00110   | YES | YES | 176 | a | 603.17 | 0.00007  | YES | YES |
| 138 | a | 398.24 | 2.33422   | YES | YES | 177 | a | 603.30 | 0.03102  | YES | YES |
| 139 | a | 467.23 | 0.00309   | YES | YES | 178 | a | 603.38 | 0.00812  | YES | YES |
| 140 | a | 471.12 | 515.77303 | YES | YES | 179 | a | 604.75 | 0.43190  | YES | YES |
| 141 | a | 473.25 | 0.00658   | YES | YES | 180 | a | 604.85 | 0.01030  | YES | YES |
| 142 | a | 477.11 | 571.61814 | YES | YES | 181 | a | 795.73 | 3.28588  | YES | YES |
| 143 | a | 505.75 | 570.85434 | YES | YES | 182 | a | 795.79 | 2.02308  | YES | YES |
| 144 | a | 530.37 | 0.00292   | YES | YES | 183 | a | 796.83 | 0.90849  | YES | YES |
| 145 | a | 543.00 | 0.00015   | YES | YES | 184 | a | 796.85 | 2.43869  | YES | YES |
| 146 | a | 543.22 | 0.26865   | YES | YES | 185 | a | 798.78 | 4.21375  | YES | YES |
| 147 | a | 543.85 | 0.00188   | YES | YES | 186 | a | 798.89 | 0.12347  | YES | YES |
| 148 | a | 543.95 | 0.05081   | YES | YES | 187 | a | 802.80 | 7.22522  | YES | YES |
| 149 | a | 544.48 | 0.51912   | YES | YES | 188 | a | 802.91 | 0.13419  | YES | YES |
| 150 | a | 544.66 | 0.00033   | YES | YES | 189 | a | 803.35 | 4.48765  | YES | YES |
| 151 | a | 545.11 | 0.00002   | YES | YES | 190 | a | 803.61 | 0.00603  | YES | YES |
| 152 | a | 545.26 | 0.08502   | YES | YES | 191 | a | 803.74 | 0.00717  | YES | YES |
| 153 | a | 545.46 | 0.10257   | YES | YES | 192 | a | 804.08 | 25.06184 | YES | YES |
| 154 | a | 545.87 | 0.00010   | YES | YES | 193 | a | 921.74 | 0.03129  | YES | YES |
| 155 | a | 546.97 | 0.11922   | YES | YES | 194 | a | 921.77 | 2.29412  | YES | YES |
| 156 | a | 547.03 | 0.01909   | YES | YES | 195 | a | 923.54 | 1.56547  | YES | YES |
| 157 | a | 547.44 | 0.08148   | YES | YES | 196 | a | 923.59 | 0.66860  | YES | YES |
| 158 | a | 547.53 | 0.00368   | YES | YES | 197 | a | 924.70 | 0.67537  | YES | YES |
| 159 | a | 547.78 | 0.22829   | YES | YES | 198 | a | 924.85 | 0.05358  | YES | YES |
| 160 | a | 547.80 | 0.00308   | YES | YES | 199 | a | 927.21 | 0.46840  | YES | YES |
| 161 | a | 549.13 | 0.00072   | YES | YES | 200 | a | 927.28 | 0.21729  | YES | YES |
| 162 | a | 549.31 | 0.13434   | YES | YES | 201 | a | 927.56 | 1.00276  | YES | YES |
| 163 | a | 587.48 | 8.45080   | YES | YES | 202 | a | 927.76 | 0.02579  | YES | YES |
| 164 | a | 587.50 | 0.07342   | YES | YES | 203 | a | 929.17 | 0.00034  | YES | YES |
| 165 | a | 587.73 | 0.03524   | YES | YES | 204 | a | 929.45 | 5.91556  | YES | YES |
| 166 | a | 587.94 | 3.77974   | YES | YES | 205 | a | 987.83 | 0.12076  | YES | YES |
| 167 | a | 589.21 | 0.00187   | YES | YES | 206 | a | 987.98 | 5.55746  | YES | YES |

|     |   |         |         |     |     |     |   |         |          |     |     |
|-----|---|---------|---------|-----|-----|-----|---|---------|----------|-----|-----|
| 207 | a | 989.15  | 7.28454 | YES | YES | 246 | a | 1051.94 | 1.51561  | YES | YES |
| 208 | a | 989.22  | 2.53329 | YES | YES | 247 | a | 1073.57 | 0.25266  | YES | YES |
| 209 | a | 989.34  | 7.15180 | YES | YES | 248 | a | 1073.62 | 0.09683  | YES | YES |
| 210 | a | 989.55  | 0.07467 | YES | YES | 249 | a | 1074.04 | 0.00396  | YES | YES |
| 211 | a | 991.47  | 6.41299 | YES | YES | 250 | a | 1074.28 | 0.53618  | YES | YES |
| 212 | a | 991.51  | 1.10067 | YES | YES | 251 | a | 1076.85 | 0.11804  | YES | YES |
| 213 | a | 992.95  | 0.00146 | YES | YES | 252 | a | 1077.00 | 0.00227  | YES | YES |
| 214 | a | 993.16  | 7.22793 | YES | YES | 253 | a | 1162.47 | 6.25216  | YES | YES |
| 215 | a | 994.51  | 2.60443 | YES | YES | 254 | a | 1162.63 | 0.20935  | YES | YES |
| 216 | a | 994.57  | 0.02395 | YES | YES | 255 | a | 1163.43 | 1.89709  | YES | YES |
| 217 | a | 994.84  | 0.48439 | YES | YES | 256 | a | 1163.88 | 0.00091  | YES | YES |
| 218 | a | 994.99  | 0.00623 | YES | YES | 257 | a | 1164.46 | 1.77284  | YES | YES |
| 219 | a | 995.74  | 0.00486 | YES | YES | 258 | a | 1164.58 | 0.02760  | YES | YES |
| 220 | a | 995.92  | 1.74767 | YES | YES | 259 | a | 1164.59 | 3.89781  | YES | YES |
| 221 | a | 996.60  | 2.15684 | YES | YES | 260 | a | 1164.73 | 0.00584  | YES | YES |
| 222 | a | 996.89  | 0.00499 | YES | YES | 261 | a | 1165.06 | 0.00023  | YES | YES |
| 223 | a | 997.42  | 0.00188 | YES | YES | 262 | a | 1165.53 | 0.13519  | YES | YES |
| 224 | a | 997.89  | 2.05254 | YES | YES | 263 | a | 1165.81 | 0.00024  | YES | YES |
| 225 | a | 998.37  | 0.79634 | YES | YES | 264 | a | 1165.99 | 0.41948  | YES | YES |
| 226 | a | 999.07  | 0.01874 | YES | YES | 265 | a | 1337.92 | 4.84635  | YES | YES |
| 227 | a | 999.15  | 0.19241 | YES | YES | 266 | a | 1338.26 | 0.00100  | YES | YES |
| 228 | a | 999.30  | 0.00458 | YES | YES | 267 | a | 1339.08 | 3.01367  | YES | YES |
| 229 | a | 999.90  | 0.00011 | YES | YES | 268 | a | 1339.28 | 0.00590  | YES | YES |
| 230 | a | 1000.52 | 0.38143 | YES | YES | 269 | a | 1339.85 | 0.02010  | YES | YES |
| 231 | a | 1007.20 | 0.07210 | YES | YES | 270 | a | 1340.01 | 0.28562  | YES | YES |
| 232 | a | 1007.32 | 0.00427 | YES | YES | 271 | a | 1340.44 | 0.00056  | YES | YES |
| 233 | a | 1010.70 | 0.00852 | YES | YES | 272 | a | 1340.70 | 11.06091 | YES | YES |
| 234 | a | 1010.73 | 0.06538 | YES | YES | 273 | a | 1341.70 | 0.00614  | YES | YES |
| 235 | a | 1047.94 | 3.10106 | YES | YES | 274 | a | 1342.11 | 1.31328  | YES | YES |
| 236 | a | 1048.07 | 0.02617 | YES | YES | 275 | a | 1342.43 | 0.54414  | YES | YES |
| 237 | a | 1048.84 | 0.00378 | YES | YES | 276 | a | 1342.65 | 0.00062  | YES | YES |
| 238 | a | 1049.09 | 1.84253 | YES | YES | 277 | a | 1344.04 | 3.86586  | YES | YES |
| 239 | a | 1049.21 | 3.95031 | YES | YES | 278 | a | 1344.13 | 2.14606  | YES | YES |
| 240 | a | 1049.36 | 0.07646 | YES | YES | 279 | a | 1344.70 | 5.18624  | YES | YES |
| 241 | a | 1049.88 | 2.23062 | YES | YES | 280 | a | 1345.04 | 0.00893  | YES | YES |
| 242 | a | 1050.00 | 0.01816 | YES | YES | 281 | a | 1345.59 | 0.00198  | YES | YES |
| 243 | a | 1051.08 | 0.37626 | YES | YES | 282 | a | 1346.39 | 10.12013 | YES | YES |
| 244 | a | 1051.11 | 0.98241 | YES | YES | 283 | a | 1347.30 | 12.93170 | YES | YES |
| 245 | a | 1051.87 | 0.16518 | YES | YES | 284 | a | 1347.56 | 0.01540  | YES | YES |

|     |   |         |          |     |     |     |   |         |           |     |     |
|-----|---|---------|----------|-----|-----|-----|---|---------|-----------|-----|-----|
| 285 | a | 1348.84 | 10.38205 | YES | YES | 324 | a | 1401.23 | 2.56283   | YES | YES |
| 286 | a | 1349.11 | 0.27371  | YES | YES | 325 | a | 1402.47 | 0.40484   | YES | YES |
| 287 | a | 1349.79 | 11.47517 | YES | YES | 326 | a | 1402.59 | 2.27103   | YES | YES |
| 288 | a | 1350.05 | 0.00471  | YES | YES | 327 | a | 1403.15 | 0.02660   | YES | YES |
| 289 | a | 1352.72 | 0.00244  | YES | YES | 328 | a | 1403.39 | 3.02163   | YES | YES |
| 290 | a | 1352.85 | 3.15522  | YES | YES | 329 | a | 1404.32 | 1.93374   | YES | YES |
| 291 | a | 1352.90 | 0.04611  | YES | YES | 330 | a | 1404.38 | 24.47539  | YES | YES |
| 292 | a | 1353.34 | 0.51794  | YES | YES | 331 | a | 1404.68 | 6.23932   | YES | YES |
| 293 | a | 1355.13 | 0.10384  | YES | YES | 332 | a | 1405.42 | 0.01596   | YES | YES |
| 294 | a | 1355.22 | 0.00010  | YES | YES | 333 | a | 1405.96 | 0.00345   | YES | YES |
| 295 | a | 1381.67 | 0.00025  | YES | YES | 334 | a | 1406.26 | 3.73859   | YES | YES |
| 296 | a | 1382.46 | 14.22651 | YES | YES | 335 | a | 1406.30 | 5.86124   | YES | YES |
| 297 | a | 1383.26 | 5.60771  | YES | YES | 336 | a | 1406.65 | 0.04358   | YES | YES |
| 298 | a | 1383.85 | 0.04307  | YES | YES | 337 | a | 1407.10 | 36.62293  | YES | YES |
| 299 | a | 1383.99 | 0.08730  | YES | YES | 338 | a | 1408.03 | 21.38746  | YES | YES |
| 300 | a | 1384.05 | 0.91824  | YES | YES | 339 | a | 1409.02 | 9.00622   | YES | YES |
| 301 | a | 1386.87 | 0.00054  | YES | YES | 340 | a | 1409.12 | 0.05159   | YES | YES |
| 302 | a | 1387.43 | 0.58079  | YES | YES | 341 | a | 1410.54 | 12.76048  | YES | YES |
| 303 | a | 1388.23 | 11.25626 | YES | YES | 342 | a | 1410.77 | 0.00249   | YES | YES |
| 304 | a | 1388.75 | 0.00107  | YES | YES | 343 | a | 1411.35 | 156.59894 | YES | YES |
| 305 | a | 1389.72 | 0.00168  | YES | YES | 344 | a | 1411.48 | 2.13029   | YES | YES |
| 306 | a | 1390.34 | 2.21170  | YES | YES | 345 | a | 1412.56 | 0.08848   | YES | YES |
| 307 | a | 1392.62 | 6.57741  | YES | YES | 346 | a | 1413.14 | 43.42048  | YES | YES |
| 308 | a | 1393.33 | 0.01746  | YES | YES | 347 | a | 1413.96 | 123.54805 | YES | YES |
| 309 | a | 1394.80 | 11.06824 | YES | YES | 348 | a | 1414.09 | 0.04848   | YES | YES |
| 310 | a | 1395.05 | 0.00231  | YES | YES | 349 | a | 1414.71 | 48.93296  | YES | YES |
| 311 | a | 1396.24 | 2.28155  | YES | YES | 350 | a | 1415.61 | 0.00279   | YES | YES |
| 312 | a | 1396.31 | 0.03270  | YES | YES | 351 | a | 1416.21 | 149.67020 | YES | YES |
| 313 | a | 1396.43 | 2.76169  | YES | YES | 352 | a | 1416.50 | 0.01441   | YES | YES |
| 314 | a | 1396.62 | 0.00757  | YES | YES | 353 | a | 1417.13 | 40.83876  | YES | YES |
| 315 | a | 1397.01 | 4.09201  | YES | YES | 354 | a | 1417.34 | 0.00205   | YES | YES |
| 316 | a | 1397.52 | 0.00252  | YES | YES | 355 | a | 1430.33 | 0.06022   | YES | YES |
| 317 | a | 1398.05 | 23.53249 | YES | YES | 356 | a | 1430.40 | 3.15535   | YES | YES |
| 318 | a | 1398.72 | 7.41197  | YES | YES | 357 | a | 1431.11 | 11.70664  | YES | YES |
| 319 | a | 1398.81 | 0.34205  | YES | YES | 358 | a | 1431.23 | 0.00044   | YES | YES |
| 320 | a | 1399.62 | 0.01957  | YES | YES | 359 | a | 1435.96 | 12.41903  | YES | YES |
| 321 | a | 1399.88 | 0.00543  | YES | YES | 360 | a | 1436.15 | 0.18533   | YES | YES |
| 322 | a | 1400.62 | 45.13941 | YES | YES | 361 | a | 1442.36 | 6.86151   | YES | YES |
| 323 | a | 1401.07 | 0.16186  | YES | YES | 362 | a | 1442.73 | 0.07607   | YES | YES |

|     |   |         |          |     |     |     |   |         |          |     |     |
|-----|---|---------|----------|-----|-----|-----|---|---------|----------|-----|-----|
| 363 | a | 1444.93 | 0.09267  | YES | YES | 402 | a | 2968.41 | 11.54233 | YES | YES |
| 364 | a | 1445.00 | 1.83640  | YES | YES | 403 | a | 2969.72 | 20.25782 | YES | YES |
| 365 | a | 1446.94 | 0.02612  | YES | YES | 404 | a | 2969.78 | 11.57564 | YES | YES |
| 366 | a | 1447.10 | 1.21406  | YES | YES | 405 | a | 2970.31 | 26.50241 | YES | YES |
| 367 | a | 1447.91 | 0.18062  | YES | YES | 406 | a | 2970.33 | 3.50257  | YES | YES |
| 368 | a | 1448.07 | 0.00891  | YES | YES | 407 | a | 2970.68 | 6.45029  | YES | YES |
| 369 | a | 1449.71 | 0.02047  | YES | YES | 408 | a | 2970.68 | 18.10245 | YES | YES |
| 370 | a | 1449.83 | 4.60348  | YES | YES | 409 | a | 2971.28 | 2.37401  | YES | YES |
| 371 | a | 1450.57 | 0.00228  | YES | YES | 410 | a | 2971.31 | 5.73642  | YES | YES |
| 372 | a | 1450.87 | 0.70929  | YES | YES | 411 | a | 2971.36 | 43.65648 | YES | YES |
| 373 | a | 1475.48 | 0.12111  | YES | YES | 412 | a | 2971.41 | 9.58764  | YES | YES |
| 374 | a | 1475.66 | 33.91641 | YES | YES | 413 | a | 2971.67 | 12.63826 | YES | YES |
| 375 | a | 1478.83 | 0.25983  | YES | YES | 414 | a | 2971.79 | 10.56394 | YES | YES |
| 376 | a | 1479.05 | 34.97751 | YES | YES | 415 | a | 3024.46 | 7.84231  | YES | YES |
| 377 | a | 1479.60 | 7.11952  | YES | YES | 416 | a | 3024.51 | 3.68626  | YES | YES |
| 378 | a | 1479.67 | 26.32872 | YES | YES | 417 | a | 3034.95 | 2.54267  | YES | YES |
| 379 | a | 1486.23 | 11.57036 | YES | YES | 418 | a | 3035.09 | 2.58509  | YES | YES |
| 380 | a | 1486.32 | 8.30144  | YES | YES | 419 | a | 3036.28 | 9.19311  | YES | YES |
| 381 | a | 1489.52 | 24.76369 | YES | YES | 420 | a | 3036.38 | 8.00040  | YES | YES |
| 382 | a | 1489.83 | 0.01462  | YES | YES | 421 | a | 3036.55 | 6.75741  | YES | YES |
| 383 | a | 1490.19 | 0.03415  | YES | YES | 422 | a | 3036.72 | 8.75772  | YES | YES |
| 384 | a | 1490.69 | 30.05075 | YES | YES | 423 | a | 3038.52 | 1.22407  | YES | YES |
| 385 | a | 2944.56 | 0.15090  | YES | YES | 424 | a | 3038.55 | 4.48789  | YES | YES |
| 386 | a | 2944.64 | 26.24521 | YES | YES | 425 | a | 3040.10 | 0.25458  | YES | YES |
| 387 | a | 2959.82 | 0.92373  | YES | YES | 426 | a | 3040.16 | 0.38400  | YES | YES |
| 388 | a | 2959.94 | 17.97982 | YES | YES | 427 | a | 3040.86 | 3.43488  | YES | YES |
| 389 | a | 2962.64 | 12.50789 | YES | YES | 428 | a | 3040.87 | 0.86267  | YES | YES |
| 390 | a | 2962.69 | 15.20937 | YES | YES | 429 | a | 3041.99 | 6.97939  | YES | YES |
| 391 | a | 2962.75 | 7.95272  | YES | YES | 430 | a | 3042.05 | 7.76470  | YES | YES |
| 392 | a | 2962.88 | 10.59210 | YES | YES | 431 | a | 3042.37 | 5.16575  | YES | YES |
| 393 | a | 2963.82 | 10.53976 | YES | YES | 432 | a | 3042.45 | 6.05321  | YES | YES |
| 394 | a | 2964.02 | 11.87738 | YES | YES | 433 | a | 3043.95 | 2.08151  | YES | YES |
| 395 | a | 2966.13 | 9.70297  | YES | YES | 434 | a | 3044.00 | 2.01475  | YES | YES |
| 396 | a | 2966.14 | 32.94705 | YES | YES | 435 | a | 3044.04 | 0.15053  | YES | YES |
| 397 | a | 2966.82 | 9.01082  | YES | YES | 436 | a | 3044.06 | 2.29191  | YES | YES |
| 398 | a | 2966.84 | 7.14448  | YES | YES | 437 | a | 3044.07 | 1.71322  | YES | YES |
| 399 | a | 2967.70 | 18.39538 | YES | YES | 438 | a | 3044.17 | 2.40739  | YES | YES |
| 400 | a | 2967.79 | 14.39845 | YES | YES | 439 | a | 3044.17 | 4.11836  | YES | YES |
| 401 | a | 2968.36 | 21.17131 | YES | YES | 440 | a | 3044.29 | 0.70645  | YES | YES |



|     |   |         |         |     |     |
|-----|---|---------|---------|-----|-----|
| 441 | a | 3045.67 | 1.74482 | YES | YES |
| 442 | a | 3045.75 | 1.85190 | YES | YES |
| 443 | a | 3045.89 | 1.28995 | YES | YES |
| 444 | a | 3045.90 | 1.03067 | YES | YES |
| 445 | a | 3064.04 | 2.21220 | YES | YES |
| 446 | a | 3064.22 | 2.11144 | YES | YES |
| 447 | a | 3065.27 | 1.66818 | YES | YES |
| 448 | a | 3065.28 | 7.62631 | YES | YES |
| 449 | a | 3066.39 | 3.76457 | YES | YES |
| 450 | a | 3066.49 | 3.79248 | YES | YES |
| 451 | a | 3070.19 | 5.08565 | YES | YES |
| 452 | a | 3070.27 | 5.45173 | YES | YES |
| 453 | a | 3070.88 | 3.21710 | YES | YES |
| 454 | a | 3070.99 | 4.71286 | YES | YES |
| 455 | a | 3071.97 | 3.90577 | YES | YES |
| 456 | a | 3072.18 | 3.79471 | YES | YES |
| 457 | a | 3072.99 | 4.64579 | YES | YES |
| 458 | a | 3073.03 | 4.05346 | YES | YES |
| 459 | a | 3073.18 | 1.96835 | YES | YES |
| 460 | a | 3073.20 | 9.79117 | YES | YES |
| 461 | a | 3073.90 | 7.02594 | YES | YES |
| 462 | a | 3074.01 | 7.75334 | YES | YES |
| 463 | a | 3075.78 | 5.30851 | YES | YES |
| 464 | a | 3075.79 | 6.69567 | YES | YES |
| 465 | a | 3080.51 | 3.06555 | YES | YES |
| 466 | a | 3080.54 | 3.40420 | YES | YES |
| 467 | a | 3081.67 | 2.74238 | YES | YES |
| 468 | a | 3081.74 | 2.74610 | YES | YES |
| 469 | a | 3082.15 | 4.14199 | YES | YES |
| 470 | a | 3082.26 | 4.27156 | YES | YES |
| 471 | a | 3083.55 | 4.40139 | YES | YES |
| 472 | a | 3083.60 | 5.18346 | YES | YES |
| 473 | a | 3089.23 | 3.44183 | YES | YES |
| 474 | a | 3089.26 | 3.74605 | YES | YES |

\$end

[In(AlCp\*)<sub>3</sub>]<sup>+</sup>

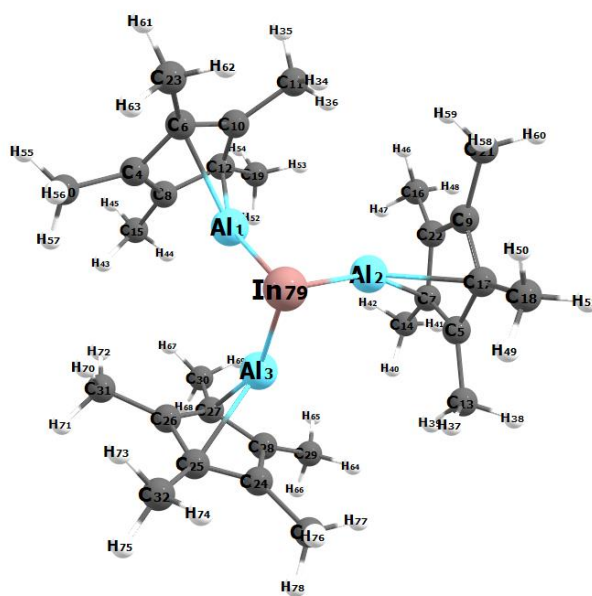

Method: (RI)-BP86(D3BJ)/def2-SVP

Symmetry: c1

Cartesian coordinates in Ångström:

Al -1.7311013 -0.1818795 0.1561599  
 Al 1.0038363 -0.1625950 1.4172197  
 Al 0.7256723 -0.1705174 -1.5800995  
 C -3.9313651 -0.2142805 -0.3565855  
 C 3.1718862 0.2349994 1.8587414  
 C -3.7551135 -0.7975212 0.9484950  
 C 2.4045074 1.4343772 2.0811632  
 C -3.4698552 1.1490523 -0.2996521  
 C 1.6567228 -0.1951006 3.5803145  
 C -3.1946017 0.2041869 1.8175050  
 C -2.8601681 0.0046775 3.2662220  
 C -3.0067779 1.4083749 1.0484630  
 C 4.2630094 0.0433007 0.8472711  
 C 2.6024617 2.7635797 1.4128831  
 C -3.5959550 2.1753547 -1.3858335  
 C 0.5831076 2.1881229 3.8060435  
 C 2.7034006 -0.7709859 2.7758141  
 C 3.2269401 -2.1731351 2.8774346  
 C -2.5251195 2.7342475 1.5605981

C -4.5146858 -0.9019360 -1.5557860  
 C 0.9118547 -0.8901420 4.6818719  
 C 1.4678236 1.1677561 3.1541142  
 C -4.1022447 -2.2023461 1.3441178  
 C 2.2705294 -0.1844257 -3.2281993  
 C 1.0537605 -0.7657945 -3.7343083  
 C 0.0187607 0.2331537 -3.6751511  
 C 0.5878280 1.4334404 -3.1162587  
 C 1.9872144 1.1747140 -2.8447742  
 C 2.9875589 2.1992694 -2.3993660  
 C -0.0990159 2.7566075 -2.9435495  
 C -1.4019866 0.0348584 -4.1144310  
 C 0.8885748 -2.1662461 -4.2461593  
 C 3.6016062 -0.8709544 -3.1382456  
 H -2.3509014 -0.9646130 3.4420426  
 H -3.7771834 0.0127171 3.8913842  
 H -2.1979053 0.8064932 3.6429873  
 H 4.1656861 -0.9243684 0.3143654  
 H 5.2613055 0.0528330 1.3320492  
 H 4.2577889 0.8478781 0.0883438  
 H 3.0875160 2.6553467 0.4255682  
 H 3.2522695 3.4202438 2.0290066  
 H 1.6451880 3.3006539 1.2617378  
 H -3.5322323 1.7236777 -2.3944537  
 H -2.8191501 2.9596711 -1.3082943  
 H -4.5806086 2.6853165 -1.3223413  
 H -0.3198767 1.7303935 4.2535503  
 H 0.2575330 2.9708288 3.0946636  
 H 1.1263208 2.7010404 4.6279006  
 H 3.5758176 -2.5531769 1.8973446  
 H 2.4574199 -2.8730448 3.2567076  
 H 4.0894906 -2.2230591 3.5751454  
 H -1.9245485 3.2786346 0.8053846  
 H -1.9029185 2.6193681 2.4668571  
 H -3.3822845 3.3868856 1.8297653  
 H -5.6233889 -0.8421177 -1.5457350  
 H -4.2460675 -1.9762877 -1.5851071  
 H -4.1694286 -0.4424452 -2.5015598  
 H 0.7488892 -1.9623988 4.4556170

|                                                          |            |            |            |    |   |        |         |     |     |
|----------------------------------------------------------|------------|------------|------------|----|---|--------|---------|-----|-----|
| H                                                        | -0.0781480 | -0.4299147 | 4.8626728  | 10 | a | 23.66  | 0.00693 | YES | YES |
| H                                                        | 1.4781947  | -0.8394639 | 5.6355674  | 11 | a | 28.07  | 0.00995 | YES | YES |
| H                                                        | -5.1347613 | -2.2546234 | 1.7495643  | 12 | a | 31.44  | 0.00320 | YES | YES |
| H                                                        | -3.4223021 | -2.5879399 | 2.1289017  | 13 | a | 48.79  | 0.16678 | YES | YES |
| H                                                        | -4.0525066 | -2.8965185 | 0.4830206  | 14 | a | 51.20  | 0.03026 | YES | YES |
| H                                                        | 3.8320271  | 1.7433551  | -1.8478786 | 15 | a | 52.88  | 0.04594 | YES | YES |
| H                                                        | 2.5302216  | 2.9731473  | -1.7538367 | 16 | a | 60.89  | 0.20586 | YES | YES |
| H                                                        | 3.4207623  | 2.7228421  | -3.2778600 | 17 | a | 65.43  | 0.04084 | YES | YES |
| H                                                        | -1.1952069 | 2.6393850  | -2.8646985 | 18 | a | 73.75  | 0.15778 | YES | YES |
| H                                                        | 0.0999492  | 3.4194448  | -3.8119944 | 19 | a | 76.16  | 0.29597 | YES | YES |
| H                                                        | 0.2497458  | 3.2915121  | -2.0380330 | 20 | a | 82.56  | 0.42426 | YES | YES |
| H                                                        | -1.8082100 | -0.9379434 | -3.7702491 | 21 | a | 85.13  | 0.20887 | YES | YES |
| H                                                        | -1.4823348 | 0.0517880  | -5.2212377 | 22 | a | 87.64  | 0.21078 | YES | YES |
| H                                                        | -2.0617351 | 0.8322971  | -3.7243001 | 23 | a | 91.79  | 0.30924 | YES | YES |
| H                                                        | -0.1318819 | -2.5543035 | -4.0592284 | 24 | a | 92.73  | 0.18563 | YES | YES |
| H                                                        | 1.6071093  | -2.8639751 | -3.7743601 | 25 | a | 93.74  | 0.04671 | YES | YES |
| H                                                        | 1.0603057  | -2.2086641 | -5.3425060 | 26 | a | 95.78  | 0.03885 | YES | YES |
| H                                                        | 3.4939257  | -1.9467440 | -2.8965091 | 27 | a | 100.02 | 0.19035 | YES | YES |
| H                                                        | 4.2479336  | -0.4149027 | -2.3642370 | 28 | a | 102.19 | 0.16800 | YES | YES |
| H                                                        | 4.1466230  | -0.8055255 | -4.1034261 | 29 | a | 105.08 | 0.01373 | YES | YES |
| In                                                       | 0.0128025  | -2.2939869 | 0.0028360  | 30 | a | 107.20 | 0.12821 | YES | YES |
|                                                          |            |            |            | 31 | a | 109.11 | 0.01575 | YES | YES |
| SCF energy GEOOPT = -2087.046213110 H                    |            |            |            | 32 | a | 109.97 | 0.13345 | YES | YES |
| ZPE = 1703. kJ/mol                                       |            |            |            | 33 | a | 121.04 | 0.14431 | YES | YES |
| FREEH energy = 1829.32 kJ/mol                            |            |            |            | 34 | a | 142.16 | 0.07191 | YES | YES |
| FREEH entropy = 1.18798 kJ/mol/K                         |            |            |            | 35 | a | 147.07 | 0.01050 | YES | YES |
|                                                          |            |            |            | 36 | a | 150.60 | 0.13385 | YES | YES |
| \$vibrational spectrum                                   |            |            |            | 37 | a | 153.93 | 0.04207 | YES | YES |
| # mode symmetry wave number IR intensity selection rules |            |            |            | 38 | a | 158.86 | 0.06771 | YES | YES |
| # cm**(-1) km/mol IR RAMAN                               |            |            |            | 39 | a | 160.19 | 0.09515 | YES | YES |
| 1 -0.00 0.00000 - -                                      |            |            |            | 40 | a | 163.04 | 0.10640 | YES | YES |
| 2 0.00 0.00000 - -                                       |            |            |            | 41 | a | 168.40 | 0.25421 | YES | YES |
| 3 0.00 0.00000 - -                                       |            |            |            | 42 | a | 172.32 | 0.26623 | YES | YES |
| 4 0.00 0.00000 - -                                       |            |            |            | 43 | a | 187.08 | 1.30028 | YES | YES |
| 5 0.00 0.00000 - -                                       |            |            |            | 44 | a | 188.05 | 1.23019 | YES | YES |
| 6 0.00 0.00000 - -                                       |            |            |            | 45 | a | 189.92 | 0.23975 | YES | YES |
| 7 a 14.27 0.01254 YES YES                                |            |            |            | 46 | a | 208.63 | 1.09467 | YES | YES |
| 8 a 17.10 0.03555 YES YES                                |            |            |            | 47 | a | 222.47 | 3.14514 | YES | YES |
| 9 a 20.24 0.02470 YES YES                                |            |            |            | 48 | a | 222.70 | 2.82537 | YES | YES |

|    |   |        |           |     |     |     |   |         |         |     |     |
|----|---|--------|-----------|-----|-----|-----|---|---------|---------|-----|-----|
| 49 | a | 231.07 | 4.79689   | YES | YES | 88  | a | 600.81  | 0.16274 | YES | YES |
| 50 | a | 237.21 | 4.33573   | YES | YES | 89  | a | 601.23  | 0.05772 | YES | YES |
| 51 | a | 237.81 | 4.90433   | YES | YES | 90  | a | 601.34  | 0.06809 | YES | YES |
| 52 | a | 271.63 | 0.05018   | YES | YES | 91  | a | 796.95  | 2.68190 | YES | YES |
| 53 | a | 272.17 | 0.11358   | YES | YES | 92  | a | 798.04  | 2.73807 | YES | YES |
| 54 | a | 272.93 | 0.14423   | YES | YES | 93  | a | 798.25  | 3.01071 | YES | YES |
| 55 | a | 274.68 | 0.20613   | YES | YES | 94  | a | 801.81  | 3.42167 | YES | YES |
| 56 | a | 276.00 | 0.06516   | YES | YES | 95  | a | 802.19  | 3.63257 | YES | YES |
| 57 | a | 277.17 | 0.12897   | YES | YES | 96  | a | 803.08  | 2.56075 | YES | YES |
| 58 | a | 280.47 | 0.14387   | YES | YES | 97  | a | 921.69  | 0.07406 | YES | YES |
| 59 | a | 282.44 | 0.65344   | YES | YES | 98  | a | 923.12  | 0.68627 | YES | YES |
| 60 | a | 282.92 | 0.70452   | YES | YES | 99  | a | 924.15  | 0.53952 | YES | YES |
| 61 | a | 285.51 | 0.10613   | YES | YES | 100 | a | 925.50  | 0.17562 | YES | YES |
| 62 | a | 287.10 | 0.82985   | YES | YES | 101 | a | 926.40  | 0.13998 | YES | YES |
| 63 | a | 288.43 | 0.81637   | YES | YES | 102 | a | 927.21  | 0.28931 | YES | YES |
| 64 | a | 378.21 | 0.15509   | YES | YES | 103 | a | 988.11  | 9.19845 | YES | YES |
| 65 | a | 379.45 | 19.87863  | YES | YES | 104 | a | 988.25  | 5.88393 | YES | YES |
| 66 | a | 379.95 | 19.79086  | YES | YES | 105 | a | 988.43  | 4.32896 | YES | YES |
| 67 | a | 390.96 | 0.65387   | YES | YES | 106 | a | 992.52  | 6.17482 | YES | YES |
| 68 | a | 392.65 | 2.78940   | YES | YES | 107 | a | 992.93  | 5.38575 | YES | YES |
| 69 | a | 393.08 | 2.40814   | YES | YES | 108 | a | 993.06  | 5.95457 | YES | YES |
| 70 | a | 455.33 | 337.18304 | YES | YES | 109 | a | 995.63  | 0.31132 | YES | YES |
| 71 | a | 456.03 | 337.45631 | YES | YES | 110 | a | 995.79  | 0.40569 | YES | YES |
| 72 | a | 503.34 | 35.52606  | YES | YES | 111 | a | 996.05  | 0.57251 | YES | YES |
| 73 | a | 543.24 | 0.09353   | YES | YES | 112 | a | 998.28  | 0.20726 | YES | YES |
| 74 | a | 543.83 | 0.02124   | YES | YES | 113 | a | 998.72  | 0.14834 | YES | YES |
| 75 | a | 544.07 | 0.02243   | YES | YES | 114 | a | 999.21  | 0.30294 | YES | YES |
| 76 | a | 544.35 | 0.10696   | YES | YES | 115 | a | 1000.64 | 0.38242 | YES | YES |
| 77 | a | 544.39 | 0.08723   | YES | YES | 116 | a | 1001.10 | 0.20670 | YES | YES |
| 78 | a | 544.95 | 0.08566   | YES | YES | 117 | a | 1001.43 | 0.79739 | YES | YES |
| 79 | a | 546.42 | 0.08244   | YES | YES | 118 | a | 1048.18 | 3.98440 | YES | YES |
| 80 | a | 546.73 | 0.07368   | YES | YES | 119 | a | 1048.43 | 2.98865 | YES | YES |
| 81 | a | 547.07 | 0.10162   | YES | YES | 120 | a | 1048.75 | 3.15140 | YES | YES |
| 82 | a | 586.85 | 3.85817   | YES | YES | 121 | a | 1050.24 | 0.26068 | YES | YES |
| 83 | a | 586.88 | 4.43669   | YES | YES | 122 | a | 1050.61 | 0.10397 | YES | YES |
| 84 | a | 587.00 | 0.95537   | YES | YES | 123 | a | 1050.97 | 0.03381 | YES | YES |
| 85 | a | 589.84 | 5.52924   | YES | YES | 124 | a | 1074.34 | 0.13077 | YES | YES |
| 86 | a | 590.05 | 5.01925   | YES | YES | 125 | a | 1074.63 | 0.10384 | YES | YES |
| 87 | a | 591.66 | 1.03984   | YES | YES | 126 | a | 1077.18 | 0.02607 | YES | YES |

|     |   |         |          |     |     |     |   |         |           |     |     |
|-----|---|---------|----------|-----|-----|-----|---|---------|-----------|-----|-----|
| 127 | a | 1163.83 | 0.01599  | YES | YES | 166 | a | 1405.89 | 3.29828   | YES | YES |
| 128 | a | 1163.93 | 0.02154  | YES | YES | 167 | a | 1406.09 | 3.18050   | YES | YES |
| 129 | a | 1164.20 | 0.00510  | YES | YES | 168 | a | 1407.32 | 10.66110  | YES | YES |
| 130 | a | 1165.36 | 0.13767  | YES | YES | 169 | a | 1407.85 | 1.02434   | YES | YES |
| 131 | a | 1165.81 | 0.36987  | YES | YES | 170 | a | 1409.30 | 15.50047  | YES | YES |
| 132 | a | 1165.87 | 0.38108  | YES | YES | 171 | a | 1409.67 | 34.72388  | YES | YES |
| 133 | a | 1338.79 | 0.08310  | YES | YES | 172 | a | 1411.08 | 17.57185  | YES | YES |
| 134 | a | 1340.12 | 0.14682  | YES | YES | 173 | a | 1411.30 | 22.80791  | YES | YES |
| 135 | a | 1340.71 | 1.08982  | YES | YES | 174 | a | 1412.36 | 8.07620   | YES | YES |
| 136 | a | 1341.09 | 0.22238  | YES | YES | 175 | a | 1413.54 | 107.50750 | YES | YES |
| 137 | a | 1341.49 | 0.24247  | YES | YES | 176 | a | 1414.43 | 87.78840  | YES | YES |
| 138 | a | 1342.05 | 2.53847  | YES | YES | 177 | a | 1415.50 | 26.66863  | YES | YES |
| 139 | a | 1345.34 | 2.52976  | YES | YES | 178 | a | 1435.21 | 0.53136   | YES | YES |
| 140 | a | 1345.67 | 3.80012  | YES | YES | 179 | a | 1436.07 | 0.45700   | YES | YES |
| 141 | a | 1346.55 | 6.79447  | YES | YES | 180 | a | 1436.23 | 0.45826   | YES | YES |
| 142 | a | 1348.48 | 5.08457  | YES | YES | 181 | a | 1444.72 | 0.02629   | YES | YES |
| 143 | a | 1349.16 | 5.52026  | YES | YES | 182 | a | 1446.73 | 0.06318   | YES | YES |
| 144 | a | 1349.79 | 15.49377 | YES | YES | 183 | a | 1446.95 | 0.06988   | YES | YES |
| 145 | a | 1351.77 | 2.24217  | YES | YES | 184 | a | 1450.13 | 0.24940   | YES | YES |
| 146 | a | 1352.07 | 0.51600  | YES | YES | 185 | a | 1450.27 | 0.19815   | YES | YES |
| 147 | a | 1353.96 | 1.94139  | YES | YES | 186 | a | 1451.04 | 0.33000   | YES | YES |
| 148 | a | 1383.88 | 1.92631  | YES | YES | 187 | a | 1480.20 | 26.71699  | YES | YES |
| 149 | a | 1384.33 | 2.22462  | YES | YES | 188 | a | 1480.35 | 3.67697   | YES | YES |
| 150 | a | 1384.73 | 0.57453  | YES | YES | 189 | a | 1480.61 | 7.79323   | YES | YES |
| 151 | a | 1388.81 | 0.51493  | YES | YES | 190 | a | 1488.27 | 5.12249   | YES | YES |
| 152 | a | 1389.04 | 0.63844  | YES | YES | 191 | a | 1488.62 | 18.13773  | YES | YES |
| 153 | a | 1389.65 | 0.03715  | YES | YES | 192 | a | 1488.82 | 19.63717  | YES | YES |
| 154 | a | 1394.63 | 17.76307 | YES | YES | 193 | a | 2964.39 | 24.45203  | YES | YES |
| 155 | a | 1395.43 | 3.07932  | YES | YES | 194 | a | 2964.92 | 32.07607  | YES | YES |
| 156 | a | 1395.88 | 2.77753  | YES | YES | 195 | a | 2964.98 | 15.54981  | YES | YES |
| 157 | a | 1397.29 | 1.87003  | YES | YES | 196 | a | 2965.55 | 45.18339  | YES | YES |
| 158 | a | 1397.76 | 1.79396  | YES | YES | 197 | a | 2965.64 | 7.78756   | YES | YES |
| 159 | a | 1398.31 | 3.03702  | YES | YES | 198 | a | 2965.68 | 14.47990  | YES | YES |
| 160 | a | 1399.11 | 0.96118  | YES | YES | 199 | a | 2965.84 | 6.53782   | YES | YES |
| 161 | a | 1401.28 | 9.99204  | YES | YES | 200 | a | 2965.89 | 3.85216   | YES | YES |
| 162 | a | 1401.67 | 10.07459 | YES | YES | 201 | a | 2966.06 | 7.58310   | YES | YES |
| 163 | a | 1402.72 | 4.80641  | YES | YES | 202 | a | 2966.76 | 24.05429  | YES | YES |
| 164 | a | 1402.99 | 0.71552  | YES | YES | 203 | a | 2967.05 | 26.56194  | YES | YES |
| 165 | a | 1403.54 | 1.28041  | YES | YES | 204 | a | 2967.12 | 18.17402  | YES | YES |

|     |   |         |          |     |     |
|-----|---|---------|----------|-----|-----|
| 205 | a | 2967.35 | 6.39695  | YES | YES |
| 206 | a | 2967.66 | 4.93947  | YES | YES |
| 207 | a | 2967.79 | 21.39381 | YES | YES |
| 208 | a | 3037.18 | 4.54167  | YES | YES |
| 209 | a | 3037.32 | 4.54106  | YES | YES |
| 210 | a | 3037.44 | 4.52159  | YES | YES |
| 211 | a | 3039.50 | 4.80347  | YES | YES |
| 212 | a | 3039.67 | 8.36046  | YES | YES |
| 213 | a | 3039.71 | 10.40187 | YES | YES |
| 214 | a | 3040.48 | 2.65836  | YES | YES |
| 215 | a | 3040.58 | 2.39333  | YES | YES |
| 216 | a | 3040.95 | 2.46536  | YES | YES |
| 217 | a | 3041.00 | 1.83275  | YES | YES |
| 218 | a | 3041.08 | 2.40234  | YES | YES |
| 219 | a | 3041.21 | 2.42770  | YES | YES |
| 220 | a | 3042.19 | 0.20792  | YES | YES |
| 221 | a | 3042.31 | 0.36711  | YES | YES |
| 222 | a | 3042.37 | 0.55239  | YES | YES |
| 223 | a | 3067.23 | 4.54212  | YES | YES |
| 224 | a | 3067.73 | 3.68760  | YES | YES |
| 225 | a | 3067.76 | 5.17092  | YES | YES |
| 226 | a | 3068.97 | 3.56452  | YES | YES |
| 227 | a | 3069.72 | 6.00183  | YES | YES |
| 228 | a | 3070.16 | 4.22410  | YES | YES |
| 229 | a | 3070.30 | 4.31002  | YES | YES |
| 230 | a | 3070.38 | 8.82050  | YES | YES |
| 231 | a | 3070.50 | 1.47992  | YES | YES |
| 232 | a | 3072.69 | 7.75680  | YES | YES |
| 233 | a | 3072.88 | 6.83322  | YES | YES |
| 234 | a | 3073.12 | 13.24153 | YES | YES |
| 235 | a | 3081.64 | 3.42563  | YES | YES |
| 236 | a | 3081.75 | 3.25677  | YES | YES |
| 237 | a | 3082.15 | 3.40441  | YES | YES |

\$end

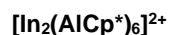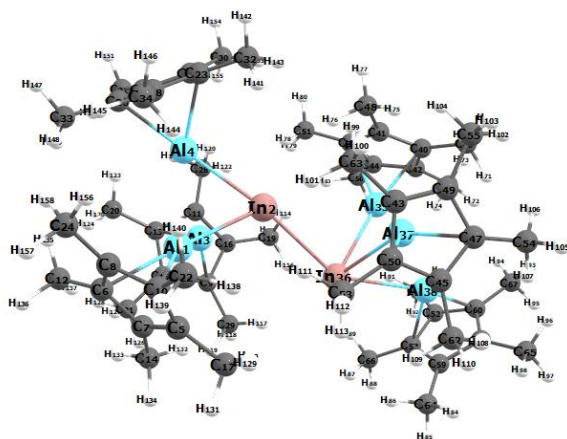

Method: (RI)-BP86(D3BJ)/def2-SVP

Symmetry: c1

Cartesian coordinates in Ångström:

Al 3.2826093 -1.7027056 0.5138570  
 In 1.1996287 -0.2102717 -0.5101412  
 Al 2.4379281 0.9496327 1.6547485  
 Al 3.6841980 0.8136567 -1.0839604  
 C 2.9039611 -3.6764672 1.5714409  
 C 4.9059020 -2.5027997 1.8052891  
 C 3.6493505 -2.8082731 2.4413718  
 C 4.9408299 -3.2106344 0.5436847  
 C 1.6239899 1.6995456 3.6317485  
 C 3.6970331 -3.9254515 0.3957737  
 C 2.5247922 3.1690209 2.0583183  
 C 6.0274135 -1.6834151 2.3744150  
 C 3.6179374 2.5059636 2.7187885  
 C 3.1752343 -2.3628006 3.7913394  
 C 3.0606345 1.6128642 3.7124019  
 C 1.2968469 2.6610895 2.6104849  
 C 1.5617641 -4.2537996 1.9117376  
 C 4.9675422 0.1407430 -2.8029191  
 C -0.0831037 3.1057916 2.2253057  
 C 5.0805680 2.7699679 2.5113526  
 C 3.8561757 0.9229353 4.7787741  
 C 3.3394460 -4.8251363 -0.7510241

C 3.9059894 0.9571786 -3.3295659  
 C 6.1381753 -3.3438968 -0.3473922  
 C 4.0392481 2.2795019 -2.7795598  
 C 5.7501034 0.9506835 -1.9024363  
 C 5.1742092 2.2802561 -1.8918057  
 C 2.6417341 4.2018400 0.9750773  
 C 0.6386762 0.9647145 4.4936553  
 C 3.2011015 3.4716455 -3.1302463  
 C 5.7693470 3.4879420 -1.2309062  
 C 2.8683107 0.4925399 -4.3078213  
 C 7.0050860 0.5472759 -1.1853690  
 C 5.1940595 -1.2971841 -3.1658853  
 Al -2.5092998 1.6359330 -0.6705378  
 In -1.5853831 -0.2900734 1.0373222  
 Al -2.4326330 -1.2631822 -1.4158203  
 Al -4.3784814 -0.2459582 0.7411312  
 C -1.4836299 3.3769027 -1.6955035  
 C -3.3552756 2.3265191 -2.6033447  
 C -1.9199713 2.4239183 -2.6818526  
 C -3.8027273 3.2231877 -1.5631430  
 C -1.3617753 -2.6136623 -2.8928697  
 C -2.6460450 3.8746840 -1.0032873  
 C -3.0417327 -3.4158838 -1.4876900  
 C -4.2570443 1.4928889 -3.4630861  
 C -3.6758662 -2.7087081 -2.5700536  
 C -1.0080922 1.6744636 -3.6063544  
 C -2.6329123 -2.2220091 -3.4503328  
 C -1.6170992 -3.3500405 -1.6850724  
 C -0.0618630 3.8096947 -1.5001379  
 C -5.6242963 0.9494784 2.1945271  
 C -0.5862318 -3.9422607 -0.7757858  
 C -5.1532617 -2.5728795 -2.7944168  
 C -2.8367894 -1.6467602 -4.8199951  
 C -2.6734005 4.9323694 0.0604592  
 C -4.9112805 -0.0607468 2.9301223  
 C -5.2347932 3.5107803 -1.2300177  
 C -5.3445992 -1.3531913 2.4639793  
 C -6.4877508 0.2855063 1.2498949  
 C -6.3117321 -1.1457412 1.4182965

|   |            |            |            |   |            |            |            |
|---|------------|------------|------------|---|------------|------------|------------|
| C | -3.7328166 | -4.0947544 | -0.3439518 | H | 0.7927230  | -2.3934032 | -2.7641369 |
| C | -0.0198197 | -2.3651452 | -3.5169815 | H | -3.8304314 | -1.1764907 | -4.9371542 |
| C | -4.8721498 | -2.6686484 | 3.0074285  | H | -2.7752150 | -2.4578383 | -5.5766758 |
| C | -7.1371465 | -2.1943652 | 0.7325953  | H | -2.0634023 | -0.9020981 | -5.0905939 |
| C | -3.9226122 | 0.1949809  | 4.0285055  | H | -5.5506257 | -3.4438889 | -3.3564410 |
| C | -7.5204738 | 0.9183543  | 0.3634149  | H | -5.4001972 | -1.6642386 | -3.3761185 |
| C | -5.4821204 | 2.4270635  | 2.4150886  | H | -5.7069808 | -2.5209832 | -1.8370717 |
| H | -3.6957938 | 0.6991381  | -3.9860238 | H | -4.7676619 | -3.7245537 | -0.2230807 |
| H | -4.7524542 | 2.1139965  | -4.2382521 | H | -3.2026244 | -3.9300867 | 0.6151450  |
| H | -5.0585856 | 1.0073642  | -2.8702009 | H | -3.7911170 | -5.1908326 | -0.5082999 |
| H | -5.8661360 | 2.6056985  | -1.3134554 | H | 0.3460523  | -3.3428691 | -0.7676070 |
| H | -5.6515174 | 4.2652280  | -1.9302125 | H | -0.3228522 | -4.9743643 | -1.0907468 |
| H | -5.3464022 | 3.9168994  | -0.2078426 | H | -0.9536162 | -3.9987429 | 0.2661784  |
| H | -1.5196782 | 0.8111304  | -4.0702797 | H | -0.2614338 | 3.0250937  | 1.1354862  |
| H | -0.1165234 | 1.2854471  | -3.0707951 | H | -0.2493084 | 4.1640326  | 2.5179118  |
| H | -0.6458685 | 2.3259096  | -4.4294093 | H | -0.8604075 | 2.5006438  | 2.7282257  |
| H | 0.6285822  | 2.9474369  | -1.3907225 | H | -0.2654836 | 0.6687168  | 3.9231762  |
| H | 0.0522170  | 4.4482306  | -0.6063795 | H | 0.3016471  | 1.5954289  | 5.3428527  |
| H | 0.2866295  | 4.4029618  | -2.3708161 | H | 1.0759680  | 0.0433629  | 4.9233826  |
| H | -3.4350163 | 4.7200366  | 0.8364500  | H | 2.6622293  | 3.7477817  | -0.0398372 |
| H | -2.9214027 | 5.9223294  | -0.3765125 | H | 3.5640116  | 4.8018563  | 1.0917742  |
| H | -1.6961793 | 5.0325491  | 0.5682629  | H | 1.7859075  | 4.9030146  | 1.0028020  |
| H | -5.1835033 | -3.5148823 | 2.3680337  | H | 5.2840254  | 3.1539685  | 1.4951797  |
| H | -5.2911783 | -2.8474500 | 4.0193750  | H | 5.6892861  | 1.8558445  | 2.6550717  |
| H | -3.7667809 | -2.7022101 | 3.1017686  | H | 5.4523387  | 3.5266332  | 3.2341525  |
| H | -3.1874836 | -0.6285857 | 4.1197104  | H | 3.2748938  | 0.1379282  | 5.2942640  |
| H | -4.4371928 | 0.2844053  | 5.0087256  | H | 4.1633705  | 1.6613970  | 5.5491825  |
| H | -3.3631960 | 1.1374311  | 3.8657607  | H | 4.7865437  | 0.4676484  | 4.3869657  |
| H | -6.1000496 | 3.0070155  | 1.7058037  | H | 1.2052972  | -4.9476437 | 1.1301484  |
| H | -4.4293014 | 2.7636505  | 2.3036814  | H | 0.7896375  | -3.4689786 | 2.0551753  |
| H | -5.8065983 | 2.7041035  | 3.4387890  | H | 1.6202507  | -4.8279818 | 2.8594677  |
| H | -7.5281253 | 0.4828623  | -0.6554984 | H | 2.2759331  | -1.7130249 | 3.7277162  |
| H | -7.3691614 | 2.0086261  | 0.2666162  | H | 3.9595570  | -1.8083477 | 4.3338464  |
| H | -8.5349839 | 0.7649488  | 0.7876366  | H | 2.8983058  | -3.2389445 | 4.4125164  |
| H | -7.3860842 | -1.9145495 | -0.3093772 | H | 6.5808714  | -1.1389384 | 1.5847687  |
| H | -8.1005766 | -2.3354769 | 1.2668281  | H | 6.7600314  | -2.3264440 | 2.9055465  |
| H | -6.6328461 | -3.1791424 | 0.7142454  | H | 5.6580804  | -0.9351418 | 3.1013425  |
| H | 0.0256884  | -1.3814220 | -4.0233902 | H | 2.2443380  | -4.9215967 | -0.8720337 |
| H | 0.2094241  | -3.1390281 | -4.2800327 | H | 3.7464878  | -5.8460380 | -0.5933962 |



|                        |                 |             |              |                 |     |    |   |       |         |     |     |
|------------------------|-----------------|-------------|--------------|-----------------|-----|----|---|-------|---------|-----|-----|
| H                      | 3.7523171       | -4.4553096  | -1.7100287   |                 |     | 12 | a | 20.48 | 0.02598 | YES | YES |
| H                      | 2.5592101       | -0.5524647  | -4.1088787   |                 |     | 13 | a | 21.24 | 0.05269 | YES | YES |
| H                      | 3.2587899       | 0.5284698   | -5.3467316   |                 |     | 14 | a | 23.76 | 0.02347 | YES | YES |
| H                      | 1.9621646       | 1.1267700   | -4.2755248   |                 |     | 15 | a | 30.47 | 0.10846 | YES | YES |
| H                      | 4.3456353       | -1.9456005  | -2.8567801   |                 |     | 16 | a | 33.48 | 0.01610 | YES | YES |
| H                      | 6.1100954       | -1.6945530  | -2.6955242   |                 |     | 17 | a | 35.73 | 0.09171 | YES | YES |
| H                      | 5.3083558       | -1.4095818  | -4.2629694   |                 |     | 18 | a | 37.56 | 0.36316 | YES | YES |
| H                      | 7.9028420       | 0.8508184   | -1.7634246   |                 |     | 19 | a | 38.02 | 0.12522 | YES | YES |
| H                      | 7.0615356       | -0.5480675  | -1.0446446   |                 |     | 20 | a | 43.02 | 0.15269 | YES | YES |
| H                      | 7.0836853       | 1.0204103   | -0.1869783   |                 |     | 21 | a | 44.98 | 0.07175 | YES | YES |
| H                      | 4.9975049       | 4.1998345   | -0.8823884   |                 |     | 22 | a | 47.67 | 0.04169 | YES | YES |
| H                      | 6.4162752       | 4.0359336   | -1.9483297   |                 |     | 23 | a | 48.86 | 0.25887 | YES | YES |
| H                      | 6.4060544       | 3.2168627   | -0.3679256   |                 |     | 24 | a | 51.96 | 0.40162 | YES | YES |
| H                      | 2.1897793       | 3.1766110   | -3.4680025   |                 |     | 25 | a | 53.71 | 0.24268 | YES | YES |
| H                      | 3.6690442       | 4.0462355   | -3.9573732   |                 |     | 26 | a | 56.09 | 0.32593 | YES | YES |
| H                      | 3.0869098       | 4.1677004   | -2.2765727   |                 |     | 27 | a | 58.10 | 0.33272 | YES | YES |
| H                      | 5.8602210       | -3.6030966  | -1.3853008   |                 |     | 28 | a | 58.80 | 1.13474 | YES | YES |
| H                      | 6.7977054       | -4.1555908  | 0.0261897    |                 |     | 29 | a | 61.50 | 0.22604 | YES | YES |
| H                      | 6.7491355       | -2.4214599  | -0.3697850   |                 |     | 30 | a | 65.81 | 0.42477 | YES | YES |
|                        |                 |             |              |                 |     | 31 | a | 68.14 | 0.59010 | YES | YES |
| SCF energy GEOOPT =    | -4174.075387183 | H           |              |                 |     | 32 | a | 71.01 | 0.94114 | YES | YES |
| ZPE =                  | 3410.           | kJ/mol      |              |                 |     | 33 | a | 71.72 | 0.02635 | YES | YES |
| FREEH energy =         | 3663.86         | kJ/mol      |              |                 |     | 34 | a | 73.63 | 0.64564 | YES | YES |
| FREEH entropy =        | 2.11740         | kJ/mol/K    |              |                 |     | 35 | a | 74.66 | 1.29160 | YES | YES |
|                        |                 |             |              |                 |     | 36 | a | 76.31 | 0.49217 | YES | YES |
| \$vibrational spectrum |                 |             |              |                 |     | 37 | a | 78.27 | 0.28975 | YES | YES |
| # mode                 | symmetry        | wave number | IR intensity | selection rules |     | 38 | a | 80.97 | 1.20114 | YES | YES |
| #                      | cm**(-1)        | km/mol      | IR           | RAMAN           |     | 39 | a | 84.52 | 2.23354 | YES | YES |
| 1                      | a               | -5.33       | 0.00000      | YES             | YES | 40 | a | 86.59 | 0.28346 | YES | YES |
| 2                      |                 | -0.00       | 0.00000      | -               | -   | 41 | a | 87.31 | 0.33718 | YES | YES |
| 3                      |                 | -0.00       | 0.00000      | -               | -   | 42 | a | 88.64 | 0.66549 | YES | YES |
| 4                      |                 | 0.00        | 0.00000      | -               | -   | 43 | a | 89.56 | 0.11490 | YES | YES |
| 5                      |                 | 0.00        | 0.00000      | -               | -   | 44 | a | 90.75 | 0.00795 | YES | YES |
| 6                      |                 | 0.00        | 0.00000      | -               | -   | 45 | a | 93.31 | 0.25467 | YES | YES |
| 7                      |                 | 0.00        | 0.00000      | -               | -   | 46 | a | 94.11 | 0.10352 | YES | YES |
| 8                      | a               | 11.24       | 0.04317      | YES             | YES | 47 | a | 95.23 | 0.10456 | YES | YES |
| 9                      | a               | 12.79       | 0.01899      | YES             | YES | 48 | a | 96.11 | 0.25507 | YES | YES |
| 10                     | a               | 16.13       | 0.01404      | YES             | YES | 49 | a | 97.03 | 0.54053 | YES | YES |
| 11                     | a               | 18.44       | 0.05050      | YES             | YES | 50 | a | 99.49 | 1.27559 | YES | YES |

|    |   |        |         |     |     |     |   |        |          |     |     |
|----|---|--------|---------|-----|-----|-----|---|--------|----------|-----|-----|
| 51 | a | 102.87 | 1.03323 | YES | YES | 90  | a | 200.62 | 0.41633  | YES | YES |
| 52 | a | 103.90 | 0.88250 | YES | YES | 91  | a | 205.22 | 5.60049  | YES | YES |
| 53 | a | 106.28 | 0.10947 | YES | YES | 92  | a | 208.58 | 20.82909 | YES | YES |
| 54 | a | 107.63 | 0.50896 | YES | YES | 93  | a | 213.39 | 1.45389  | YES | YES |
| 55 | a | 109.50 | 0.07574 | YES | YES | 94  | a | 216.44 | 8.21960  | YES | YES |
| 56 | a | 110.11 | 0.18145 | YES | YES | 95  | a | 218.17 | 6.49279  | YES | YES |
| 57 | a | 110.99 | 0.10824 | YES | YES | 96  | a | 220.52 | 2.17451  | YES | YES |
| 58 | a | 115.01 | 0.29495 | YES | YES | 97  | a | 226.32 | 23.60300 | YES | YES |
| 59 | a | 115.70 | 0.59666 | YES | YES | 98  | a | 227.71 | 8.30454  | YES | YES |
| 60 | a | 120.11 | 0.26339 | YES | YES | 99  | a | 228.89 | 2.86115  | YES | YES |
| 61 | a | 124.92 | 3.06380 | YES | YES | 100 | a | 233.23 | 3.29713  | YES | YES |
| 62 | a | 127.63 | 1.00212 | YES | YES | 101 | a | 233.37 | 7.79662  | YES | YES |
| 63 | a | 129.58 | 0.10492 | YES | YES | 102 | a | 236.62 | 1.69791  | YES | YES |
| 64 | a | 132.44 | 0.17896 | YES | YES | 103 | a | 263.88 | 0.31875  | YES | YES |
| 65 | a | 140.17 | 0.47726 | YES | YES | 104 | a | 266.11 | 0.09739  | YES | YES |
| 66 | a | 142.72 | 0.28034 | YES | YES | 105 | a | 266.28 | 0.03164  | YES | YES |
| 67 | a | 147.09 | 0.68631 | YES | YES | 106 | a | 266.74 | 0.04964  | YES | YES |
| 68 | a | 150.08 | 0.25448 | YES | YES | 107 | a | 267.35 | 0.71230  | YES | YES |
| 69 | a | 151.37 | 0.49968 | YES | YES | 108 | a | 268.24 | 0.18691  | YES | YES |
| 70 | a | 157.96 | 0.12114 | YES | YES | 109 | a | 269.65 | 0.16879  | YES | YES |
| 71 | a | 159.12 | 0.86334 | YES | YES | 110 | a | 269.88 | 0.14289  | YES | YES |
| 72 | a | 161.43 | 0.83184 | YES | YES | 111 | a | 272.09 | 0.24425  | YES | YES |
| 73 | a | 162.79 | 1.00887 | YES | YES | 112 | a | 272.41 | 0.28030  | YES | YES |
| 74 | a | 163.54 | 0.10493 | YES | YES | 113 | a | 274.15 | 0.08357  | YES | YES |
| 75 | a | 165.29 | 0.40788 | YES | YES | 114 | a | 278.30 | 0.52870  | YES | YES |
| 76 | a | 167.20 | 0.06855 | YES | YES | 115 | a | 278.53 | 0.77438  | YES | YES |
| 77 | a | 171.16 | 0.42566 | YES | YES | 116 | a | 279.37 | 0.15544  | YES | YES |
| 78 | a | 172.69 | 0.16212 | YES | YES | 117 | a | 280.52 | 0.64047  | YES | YES |
| 79 | a | 175.39 | 1.75837 | YES | YES | 118 | a | 281.43 | 0.06434  | YES | YES |
| 80 | a | 176.56 | 0.02682 | YES | YES | 119 | a | 281.98 | 0.98199  | YES | YES |
| 81 | a | 179.15 | 0.90437 | YES | YES | 120 | a | 284.14 | 1.85616  | YES | YES |
| 82 | a | 180.47 | 0.35743 | YES | YES | 121 | a | 285.22 | 0.17719  | YES | YES |
| 83 | a | 186.00 | 0.44404 | YES | YES | 122 | a | 286.24 | 0.97292  | YES | YES |
| 84 | a | 188.11 | 2.37285 | YES | YES | 123 | a | 286.91 | 0.27587  | YES | YES |
| 85 | a | 190.42 | 0.92147 | YES | YES | 124 | a | 287.29 | 0.37534  | YES | YES |
| 86 | a | 190.68 | 1.21461 | YES | YES | 125 | a | 288.53 | 0.15248  | YES | YES |
| 87 | a | 191.21 | 0.20418 | YES | YES | 126 | a | 289.95 | 0.79196  | YES | YES |
| 88 | a | 192.28 | 1.72630 | YES | YES | 127 | a | 366.20 | 3.16027  | YES | YES |
| 89 | a | 193.99 | 0.18222 | YES | YES | 128 | a | 371.33 | 5.05545  | YES | YES |

|     |   |        |           |     |     |     |   |        |          |     |     |
|-----|---|--------|-----------|-----|-----|-----|---|--------|----------|-----|-----|
| 129 | a | 372.83 | 12.60395  | YES | YES | 168 | a | 587.77 | 16.00959 | YES | YES |
| 130 | a | 375.35 | 3.40027   | YES | YES | 169 | a | 588.04 | 2.90142  | YES | YES |
| 131 | a | 375.82 | 6.00482   | YES | YES | 170 | a | 589.48 | 3.42709  | YES | YES |
| 132 | a | 380.47 | 3.08779   | YES | YES | 171 | a | 591.14 | 10.48656 | YES | YES |
| 133 | a | 386.70 | 6.10556   | YES | YES | 172 | a | 592.67 | 5.60194  | YES | YES |
| 134 | a | 388.70 | 9.50985   | YES | YES | 173 | a | 594.91 | 5.95752  | YES | YES |
| 135 | a | 389.52 | 3.69448   | YES | YES | 174 | a | 595.22 | 0.53003  | YES | YES |
| 136 | a | 392.97 | 1.88540   | YES | YES | 175 | a | 595.34 | 8.84273  | YES | YES |
| 137 | a | 393.65 | 4.85773   | YES | YES | 176 | a | 595.59 | 1.23781  | YES | YES |
| 138 | a | 395.08 | 0.74003   | YES | YES | 177 | a | 596.90 | 2.08171  | YES | YES |
| 139 | a | 444.88 | 160.78106 | YES | YES | 178 | a | 597.39 | 2.97485  | YES | YES |
| 140 | a | 449.73 | 348.90643 | YES | YES | 179 | a | 597.72 | 1.53753  | YES | YES |
| 141 | a | 450.87 | 89.24642  | YES | YES | 180 | a | 599.64 | 0.33562  | YES | YES |
| 142 | a | 455.27 | 437.30565 | YES | YES | 181 | a | 795.02 | 2.29790  | YES | YES |
| 143 | a | 482.66 | 387.08875 | YES | YES | 182 | a | 796.59 | 4.76094  | YES | YES |
| 144 | a | 498.56 | 18.65710  | YES | YES | 183 | a | 797.07 | 3.26414  | YES | YES |
| 145 | a | 541.74 | 0.14492   | YES | YES | 184 | a | 797.79 | 1.19079  | YES | YES |
| 146 | a | 543.45 | 0.20872   | YES | YES | 185 | a | 798.32 | 1.83179  | YES | YES |
| 147 | a | 543.79 | 1.14505   | YES | YES | 186 | a | 800.81 | 2.99882  | YES | YES |
| 148 | a | 544.16 | 0.50400   | YES | YES | 187 | a | 802.50 | 8.23950  | YES | YES |
| 149 | a | 544.24 | 0.67548   | YES | YES | 188 | a | 803.36 | 3.70569  | YES | YES |
| 150 | a | 544.43 | 0.27791   | YES | YES | 189 | a | 803.66 | 3.50541  | YES | YES |
| 151 | a | 544.72 | 0.26166   | YES | YES | 190 | a | 804.65 | 2.71064  | YES | YES |
| 152 | a | 544.80 | 0.15215   | YES | YES | 191 | a | 805.90 | 2.41796  | YES | YES |
| 153 | a | 545.10 | 0.09720   | YES | YES | 192 | a | 805.96 | 3.51086  | YES | YES |
| 154 | a | 545.41 | 0.03234   | YES | YES | 193 | a | 919.86 | 2.06818  | YES | YES |
| 155 | a | 545.95 | 0.05555   | YES | YES | 194 | a | 920.86 | 2.44297  | YES | YES |
| 156 | a | 546.60 | 0.01988   | YES | YES | 195 | a | 922.50 | 0.72237  | YES | YES |
| 157 | a | 546.91 | 0.45948   | YES | YES | 196 | a | 922.76 | 0.80357  | YES | YES |
| 158 | a | 547.32 | 0.08645   | YES | YES | 197 | a | 924.74 | 1.05300  | YES | YES |
| 159 | a | 547.80 | 0.35296   | YES | YES | 198 | a | 925.54 | 0.64672  | YES | YES |
| 160 | a | 548.90 | 0.28496   | YES | YES | 199 | a | 929.05 | 1.51341  | YES | YES |
| 161 | a | 550.15 | 0.29981   | YES | YES | 200 | a | 929.91 | 1.29289  | YES | YES |
| 162 | a | 550.60 | 0.09069   | YES | YES | 201 | a | 930.09 | 0.17272  | YES | YES |
| 163 | a | 580.85 | 0.72130   | YES | YES | 202 | a | 930.50 | 1.44020  | YES | YES |
| 164 | a | 583.17 | 2.57147   | YES | YES | 203 | a | 932.02 | 0.13650  | YES | YES |
| 165 | a | 583.28 | 3.32749   | YES | YES | 204 | a | 932.47 | 0.36387  | YES | YES |
| 166 | a | 583.51 | 2.75082   | YES | YES | 205 | a | 985.12 | 7.06680  | YES | YES |
| 167 | a | 584.00 | 4.45230   | YES | YES | 206 | a | 985.68 | 3.40854  | YES | YES |

|     |   |         |         |     |     |     |   |         |         |     |     |
|-----|---|---------|---------|-----|-----|-----|---|---------|---------|-----|-----|
| 207 | a | 987.91  | 3.04178 | YES | YES | 246 | a | 1052.79 | 0.34768 | YES | YES |
| 208 | a | 988.60  | 2.48693 | YES | YES | 247 | a | 1072.23 | 0.19989 | YES | YES |
| 209 | a | 989.28  | 3.70539 | YES | YES | 248 | a | 1073.56 | 0.25123 | YES | YES |
| 210 | a | 990.22  | 2.10155 | YES | YES | 249 | a | 1074.01 | 0.32124 | YES | YES |
| 211 | a | 990.63  | 4.21880 | YES | YES | 250 | a | 1075.22 | 0.25855 | YES | YES |
| 212 | a | 991.92  | 1.87438 | YES | YES | 251 | a | 1076.46 | 0.11107 | YES | YES |
| 213 | a | 992.30  | 4.94848 | YES | YES | 252 | a | 1077.68 | 0.06206 | YES | YES |
| 214 | a | 992.40  | 0.83258 | YES | YES | 253 | a | 1161.82 | 0.86968 | YES | YES |
| 215 | a | 992.98  | 6.55500 | YES | YES | 254 | a | 1162.50 | 0.25073 | YES | YES |
| 216 | a | 993.20  | 2.35978 | YES | YES | 255 | a | 1163.40 | 0.08632 | YES | YES |
| 217 | a | 993.55  | 0.16245 | YES | YES | 256 | a | 1163.92 | 0.42702 | YES | YES |
| 218 | a | 993.75  | 0.55312 | YES | YES | 257 | a | 1164.35 | 0.15693 | YES | YES |
| 219 | a | 994.27  | 0.91233 | YES | YES | 258 | a | 1164.53 | 0.44985 | YES | YES |
| 220 | a | 994.75  | 1.68229 | YES | YES | 259 | a | 1165.38 | 0.53380 | YES | YES |
| 221 | a | 995.37  | 0.25013 | YES | YES | 260 | a | 1165.81 | 0.14385 | YES | YES |
| 222 | a | 995.63  | 0.37833 | YES | YES | 261 | a | 1166.10 | 0.21218 | YES | YES |
| 223 | a | 996.66  | 0.12813 | YES | YES | 262 | a | 1166.23 | 0.33324 | YES | YES |
| 224 | a | 996.81  | 1.26342 | YES | YES | 263 | a | 1166.78 | 0.18694 | YES | YES |
| 225 | a | 997.10  | 0.67093 | YES | YES | 264 | a | 1167.32 | 0.31386 | YES | YES |
| 226 | a | 997.69  | 0.30016 | YES | YES | 265 | a | 1338.20 | 1.34109 | YES | YES |
| 227 | a | 997.81  | 1.11451 | YES | YES | 266 | a | 1338.40 | 0.95652 | YES | YES |
| 228 | a | 999.81  | 0.43872 | YES | YES | 267 | a | 1339.40 | 1.74396 | YES | YES |
| 229 | a | 1002.72 | 0.06673 | YES | YES | 268 | a | 1339.71 | 2.92347 | YES | YES |
| 230 | a | 1005.31 | 1.11227 | YES | YES | 269 | a | 1339.89 | 0.20135 | YES | YES |
| 231 | a | 1005.44 | 0.20152 | YES | YES | 270 | a | 1340.26 | 1.87945 | YES | YES |
| 232 | a | 1007.08 | 0.13950 | YES | YES | 271 | a | 1340.41 | 0.53251 | YES | YES |
| 233 | a | 1010.36 | 0.03563 | YES | YES | 272 | a | 1340.93 | 2.96704 | YES | YES |
| 234 | a | 1013.39 | 0.45413 | YES | YES | 273 | a | 1341.16 | 0.39080 | YES | YES |
| 235 | a | 1046.77 | 1.02895 | YES | YES | 274 | a | 1341.27 | 0.41667 | YES | YES |
| 236 | a | 1047.20 | 2.24046 | YES | YES | 275 | a | 1342.12 | 0.76568 | YES | YES |
| 237 | a | 1048.66 | 1.37897 | YES | YES | 276 | a | 1342.60 | 0.64365 | YES | YES |
| 238 | a | 1048.81 | 2.77270 | YES | YES | 277 | a | 1344.38 | 2.46406 | YES | YES |
| 239 | a | 1049.21 | 2.18071 | YES | YES | 278 | a | 1345.57 | 3.77966 | YES | YES |
| 240 | a | 1049.59 | 2.69151 | YES | YES | 279 | a | 1345.78 | 0.78672 | YES | YES |
| 241 | a | 1049.88 | 0.15660 | YES | YES | 280 | a | 1345.96 | 2.79402 | YES | YES |
| 242 | a | 1050.96 | 0.68197 | YES | YES | 281 | a | 1346.36 | 5.64642 | YES | YES |
| 243 | a | 1051.59 | 1.85732 | YES | YES | 282 | a | 1346.47 | 2.22237 | YES | YES |
| 244 | a | 1051.93 | 0.36203 | YES | YES | 283 | a | 1347.43 | 5.24215 | YES | YES |
| 245 | a | 1052.40 | 0.46332 | YES | YES | 284 | a | 1347.51 | 2.95622 | YES | YES |

|     |   |         |          |     |     |     |   |         |           |     |     |
|-----|---|---------|----------|-----|-----|-----|---|---------|-----------|-----|-----|
| 285 | a | 1347.97 | 2.50374  | YES | YES | 324 | a | 1401.59 | 10.95896  | YES | YES |
| 286 | a | 1348.31 | 14.41930 | YES | YES | 325 | a | 1402.04 | 2.50330   | YES | YES |
| 287 | a | 1348.53 | 6.63290  | YES | YES | 326 | a | 1402.55 | 2.68667   | YES | YES |
| 288 | a | 1348.85 | 5.43578  | YES | YES | 327 | a | 1403.02 | 0.23185   | YES | YES |
| 289 | a | 1349.97 | 3.77033  | YES | YES | 328 | a | 1403.08 | 9.96578   | YES | YES |
| 290 | a | 1350.82 | 0.06499  | YES | YES | 329 | a | 1403.70 | 12.27724  | YES | YES |
| 291 | a | 1351.28 | 3.12292  | YES | YES | 330 | a | 1404.25 | 8.37692   | YES | YES |
| 292 | a | 1351.63 | 0.69614  | YES | YES | 331 | a | 1404.58 | 5.26046   | YES | YES |
| 293 | a | 1351.82 | 0.13110  | YES | YES | 332 | a | 1405.18 | 17.56376  | YES | YES |
| 294 | a | 1352.82 | 1.53046  | YES | YES | 333 | a | 1405.50 | 13.93135  | YES | YES |
| 295 | a | 1380.04 | 1.65836  | YES | YES | 334 | a | 1405.90 | 1.57435   | YES | YES |
| 296 | a | 1381.16 | 2.74248  | YES | YES | 335 | a | 1406.44 | 10.34606  | YES | YES |
| 297 | a | 1382.31 | 5.88077  | YES | YES | 336 | a | 1407.48 | 2.25441   | YES | YES |
| 298 | a | 1382.96 | 8.33724  | YES | YES | 337 | a | 1407.83 | 3.07104   | YES | YES |
| 299 | a | 1383.78 | 1.28158  | YES | YES | 338 | a | 1408.70 | 5.25993   | YES | YES |
| 300 | a | 1384.26 | 3.69216  | YES | YES | 339 | a | 1409.24 | 9.06103   | YES | YES |
| 301 | a | 1385.95 | 2.11579  | YES | YES | 340 | a | 1409.66 | 5.22307   | YES | YES |
| 302 | a | 1386.65 | 2.92920  | YES | YES | 341 | a | 1409.96 | 12.08917  | YES | YES |
| 303 | a | 1387.48 | 2.39720  | YES | YES | 342 | a | 1410.82 | 34.66479  | YES | YES |
| 304 | a | 1388.77 | 6.87161  | YES | YES | 343 | a | 1411.24 | 27.26141  | YES | YES |
| 305 | a | 1390.19 | 2.90309  | YES | YES | 344 | a | 1412.19 | 35.40475  | YES | YES |
| 306 | a | 1390.51 | 0.41525  | YES | YES | 345 | a | 1412.59 | 90.99537  | YES | YES |
| 307 | a | 1392.52 | 1.22359  | YES | YES | 346 | a | 1413.56 | 106.87702 | YES | YES |
| 308 | a | 1393.28 | 3.25892  | YES | YES | 347 | a | 1414.56 | 20.23691  | YES | YES |
| 309 | a | 1393.99 | 5.05509  | YES | YES | 348 | a | 1415.20 | 16.15444  | YES | YES |
| 310 | a | 1394.04 | 7.84595  | YES | YES | 349 | a | 1415.63 | 75.03880  | YES | YES |
| 311 | a | 1394.76 | 1.94745  | YES | YES | 350 | a | 1416.77 | 58.22957  | YES | YES |
| 312 | a | 1396.05 | 5.90163  | YES | YES | 351 | a | 1417.64 | 14.13728  | YES | YES |
| 313 | a | 1396.14 | 1.38136  | YES | YES | 352 | a | 1418.51 | 38.60777  | YES | YES |
| 314 | a | 1396.48 | 7.57897  | YES | YES | 353 | a | 1419.95 | 8.52082   | YES | YES |
| 315 | a | 1396.70 | 0.30563  | YES | YES | 354 | a | 1420.45 | 16.52209  | YES | YES |
| 316 | a | 1397.28 | 1.11188  | YES | YES | 355 | a | 1429.74 | 10.04317  | YES | YES |
| 317 | a | 1398.35 | 2.10005  | YES | YES | 356 | a | 1432.99 | 16.10448  | YES | YES |
| 318 | a | 1398.64 | 0.86661  | YES | YES | 357 | a | 1434.31 | 3.64133   | YES | YES |
| 319 | a | 1399.02 | 10.24760 | YES | YES | 358 | a | 1435.13 | 3.92374   | YES | YES |
| 320 | a | 1399.75 | 15.98295 | YES | YES | 359 | a | 1436.10 | 0.78493   | YES | YES |
| 321 | a | 1400.02 | 0.63091  | YES | YES | 360 | a | 1437.51 | 2.13808   | YES | YES |
| 322 | a | 1400.24 | 13.05524 | YES | YES | 361 | a | 1444.42 | 0.05775   | YES | YES |
| 323 | a | 1400.96 | 2.78938  | YES | YES | 362 | a | 1444.48 | 2.54606   | YES | YES |

|     |   |         |          |     |     |     |   |         |          |     |     |
|-----|---|---------|----------|-----|-----|-----|---|---------|----------|-----|-----|
| 363 | a | 1444.51 | 1.75146  | YES | YES | 402 | a | 2967.90 | 8.49697  | YES | YES |
| 364 | a | 1445.44 | 1.61867  | YES | YES | 403 | a | 2967.98 | 9.14704  | YES | YES |
| 365 | a | 1445.56 | 1.49589  | YES | YES | 404 | a | 2968.17 | 21.50388 | YES | YES |
| 366 | a | 1446.40 | 0.72415  | YES | YES | 405 | a | 2969.20 | 24.36942 | YES | YES |
| 367 | a | 1446.85 | 2.19574  | YES | YES | 406 | a | 2969.32 | 2.47900  | YES | YES |
| 368 | a | 1449.24 | 1.49787  | YES | YES | 407 | a | 2969.72 | 24.11888 | YES | YES |
| 369 | a | 1449.62 | 0.23749  | YES | YES | 408 | a | 2969.74 | 19.31396 | YES | YES |
| 370 | a | 1450.46 | 2.21709  | YES | YES | 409 | a | 2970.05 | 15.42901 | YES | YES |
| 371 | a | 1450.77 | 1.40435  | YES | YES | 410 | a | 2970.13 | 20.17960 | YES | YES |
| 372 | a | 1451.90 | 1.05458  | YES | YES | 411 | a | 2970.29 | 7.93954  | YES | YES |
| 373 | a | 1477.31 | 19.00749 | YES | YES | 412 | a | 2970.36 | 11.54136 | YES | YES |
| 374 | a | 1479.63 | 12.31034 | YES | YES | 413 | a | 2970.61 | 3.42939  | YES | YES |
| 375 | a | 1479.85 | 11.17296 | YES | YES | 414 | a | 2970.84 | 6.14878  | YES | YES |
| 376 | a | 1480.14 | 10.37715 | YES | YES | 415 | a | 3020.23 | 5.89263  | YES | YES |
| 377 | a | 1480.63 | 9.74653  | YES | YES | 416 | a | 3025.09 | 11.73403 | YES | YES |
| 378 | a | 1481.58 | 14.65101 | YES | YES | 417 | a | 3025.50 | 1.78016  | YES | YES |
| 379 | a | 1488.09 | 11.63892 | YES | YES | 418 | a | 3029.49 | 0.32278  | YES | YES |
| 380 | a | 1488.39 | 10.92767 | YES | YES | 419 | a | 3030.02 | 6.39663  | YES | YES |
| 381 | a | 1489.12 | 20.32225 | YES | YES | 420 | a | 3030.75 | 6.36176  | YES | YES |
| 382 | a | 1489.65 | 14.57517 | YES | YES | 421 | a | 3031.11 | 5.37430  | YES | YES |
| 383 | a | 1490.33 | 11.76157 | YES | YES | 422 | a | 3032.14 | 3.87168  | YES | YES |
| 384 | a | 1490.54 | 12.28508 | YES | YES | 423 | a | 3032.92 | 4.62234  | YES | YES |
| 385 | a | 2948.16 | 11.51027 | YES | YES | 424 | a | 3033.75 | 6.27055  | YES | YES |
| 386 | a | 2949.38 | 11.84107 | YES | YES | 425 | a | 3034.94 | 2.96671  | YES | YES |
| 387 | a | 2953.29 | 12.01474 | YES | YES | 426 | a | 3036.41 | 2.35066  | YES | YES |
| 388 | a | 2953.94 | 15.08069 | YES | YES | 427 | a | 3037.09 | 6.37186  | YES | YES |
| 389 | a | 2954.00 | 15.28180 | YES | YES | 428 | a | 3039.14 | 4.03047  | YES | YES |
| 390 | a | 2955.49 | 14.27743 | YES | YES | 429 | a | 3039.76 | 3.90975  | YES | YES |
| 391 | a | 2957.52 | 14.86035 | YES | YES | 430 | a | 3040.59 | 4.03167  | YES | YES |
| 392 | a | 2958.39 | 6.85254  | YES | YES | 431 | a | 3041.11 | 3.18077  | YES | YES |
| 393 | a | 2958.45 | 13.77009 | YES | YES | 432 | a | 3041.74 | 0.30318  | YES | YES |
| 394 | a | 2960.16 | 12.41375 | YES | YES | 433 | a | 3041.83 | 3.88071  | YES | YES |
| 395 | a | 2961.28 | 7.63134  | YES | YES | 434 | a | 3042.17 | 4.90139  | YES | YES |
| 396 | a | 2963.03 | 9.32270  | YES | YES | 435 | a | 3042.45 | 5.46564  | YES | YES |
| 397 | a | 2963.28 | 15.70946 | YES | YES | 436 | a | 3043.88 | 2.26842  | YES | YES |
| 398 | a | 2965.79 | 7.84483  | YES | YES | 437 | a | 3044.14 | 2.94474  | YES | YES |
| 399 | a | 2966.61 | 15.88381 | YES | YES | 438 | a | 3044.28 | 1.37208  | YES | YES |
| 400 | a | 2967.21 | 11.31395 | YES | YES | 439 | a | 3044.66 | 3.87558  | YES | YES |
| 401 | a | 2967.30 | 25.64029 | YES | YES | 440 | a | 3045.31 | 3.78164  | YES | YES |

|     |   |         |          |     |     |
|-----|---|---------|----------|-----|-----|
| 441 | a | 3045.71 | 1.83082  | YES | YES |
| 442 | a | 3046.29 | 1.36894  | YES | YES |
| 443 | a | 3046.53 | 0.91220  | YES | YES |
| 444 | a | 3047.44 | 1.48320  | YES | YES |
| 445 | a | 3059.56 | 5.01342  | YES | YES |
| 446 | a | 3060.79 | 3.85611  | YES | YES |
| 447 | a | 3062.87 | 6.02680  | YES | YES |
| 448 | a | 3064.83 | 3.00652  | YES | YES |
| 449 | a | 3068.51 | 4.70473  | YES | YES |
| 450 | a | 3069.68 | 2.24576  | YES | YES |
| 451 | a | 3070.69 | 3.93447  | YES | YES |
| 452 | a | 3070.75 | 2.72040  | YES | YES |
| 453 | a | 3071.08 | 2.67456  | YES | YES |
| 454 | a | 3072.45 | 4.09416  | YES | YES |
| 455 | a | 3073.13 | 4.16661  | YES | YES |
| 456 | a | 3074.89 | 5.10896  | YES | YES |
| 457 | a | 3075.15 | 4.58752  | YES | YES |
| 458 | a | 3075.46 | 4.34165  | YES | YES |
| 459 | a | 3075.96 | 4.09184  | YES | YES |
| 460 | a | 3076.17 | 5.23120  | YES | YES |
| 461 | a | 3079.24 | 4.27090  | YES | YES |
| 462 | a | 3080.92 | 3.66634  | YES | YES |
| 463 | a | 3081.05 | 3.95184  | YES | YES |
| 464 | a | 3081.71 | 5.64506  | YES | YES |
| 465 | a | 3082.83 | 1.69465  | YES | YES |
| 466 | a | 3083.16 | 10.31738 | YES | YES |
| 467 | a | 3085.18 | 1.49866  | YES | YES |
| 468 | a | 3085.40 | 0.96438  | YES | YES |
| 469 | a | 3085.51 | 4.41574  | YES | YES |
| 470 | a | 3090.08 | 4.05885  | YES | YES |
| 471 | a | 3090.32 | 3.44866  | YES | YES |
| 472 | a | 3095.31 | 1.15502  | YES | YES |
| 473 | a | 3096.07 | 2.55273  | YES | YES |
| 474 | a | 3101.63 | 2.57119  | YES | YES |

\$end

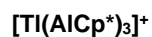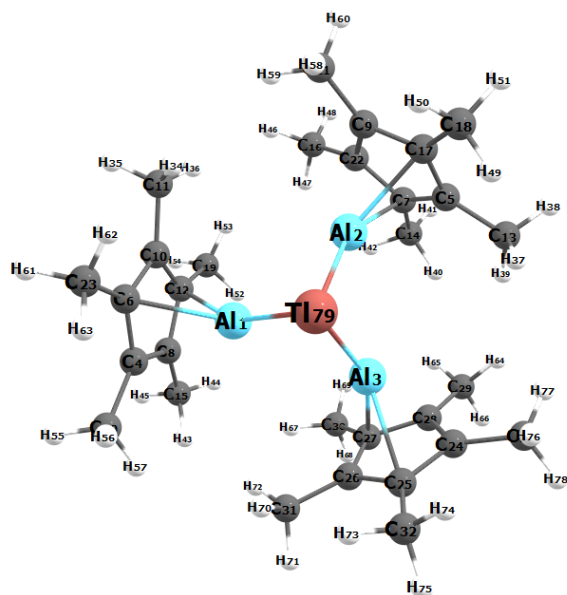

Method: (RI)-BP86(D3BJ)/def2-SVP

Symmetry: c1

Cartesian coordinates in Ångström:

Al -1.7509837 -0.1870033 0.0864023  
 Al 0.9546585 -0.1828170 1.4732753  
 Al 0.8048662 -0.1813994 -1.5606852  
 C -3.9651612 -0.2045597 -0.3804434  
 C 3.1320611 0.2303424 1.8635867  
 C -3.7629266 -0.7961948 0.9174755  
 C 2.3640431 1.4282125 2.0878913  
 C -3.4965306 1.1559728 -0.3259156  
 C 1.6576920 -0.1851711 3.6236940  
 C -3.1814038 0.1987438 1.7800323  
 C -2.8118574 -0.0112930 3.2185444  
 C -3.0025274 1.4051251 1.0135024  
 C 4.1958787 0.0298296 0.8253085  
 C 2.5359537 2.7459856 1.3901565  
 C -3.6446188 2.1890478 -1.4030629  
 C 0.5817485 2.1955038 3.8493087  
 C 2.6879176 -0.7670342 2.8016586  
 C 3.2227278 -2.1646284 2.9099665  
 C -2.4973581 2.7234558 1.5229267

C -4.5800135 -0.8824121 -1.5694399  
 C 0.9428475 -0.8677407 4.7526496  
 C 1.4541119 1.1716050 3.1861859  
 C -4.1109127 -2.2007835 1.3138032  
 C 2.3076671 -0.1789524 -3.2518446  
 C 1.0796110 -0.7628091 -3.7278040  
 C 0.0435394 0.2323289 -3.6371712  
 C 0.6218513 1.4308032 -3.0857725  
 C 2.0296705 1.1769824 -2.8545252  
 C 3.0409456 2.2026191 -2.4365453  
 C -0.0708753 2.7462251 -2.8791824  
 C -1.3892702 0.0288914 -4.0320369  
 C 0.9054616 -2.1603245 -4.2450810  
 C 3.6446458 -0.8582966 -3.2044973  
 H -2.3001641 -0.9828451 3.3745260  
 H -3.7126651 -0.0048094 3.8668831  
 H -2.1372766 0.7858787 3.5828757  
 H 4.0849223 -0.9431326 0.3045445  
 H 5.2072115 0.0461453 1.2821434  
 H 4.1673394 0.8263397 0.0584803  
 H 2.9653302 2.6182864 0.3794340  
 H 3.2232926 3.4070843 1.9589877  
 H 1.5756042 3.2877474 1.2826655  
 H -3.5942600 1.7460386 -2.4163312  
 H -2.8716031 2.9777136 -1.3314796  
 H -4.6309115 2.6931344 -1.3204819  
 H -0.3173866 1.7424576 4.3093567  
 H 0.2505707 2.9798426 3.1423423  
 H 1.1380244 2.7064092 4.6636683  
 H 3.5530520 -2.5550307 1.9275545  
 H 2.4665371 -2.8645300 3.3150940  
 H 4.1005875 -2.1996393 3.5892656  
 H -1.9288000 3.2771096 0.7500957  
 H -1.8365875 2.5946599 2.3997694  
 H -3.3404258 3.3737110 1.8384538  
 H -5.6879836 -0.8200069 -1.5308778  
 H -4.3151148 -1.9572244 -1.6129117  
 H -4.2577331 -0.4172551 -2.5205242  
 H 0.7927929 -1.9468839 4.5521288



|                        |                 |             |              |                 |     |        |         |         |         |     |     |
|------------------------|-----------------|-------------|--------------|-----------------|-----|--------|---------|---------|---------|-----|-----|
| H                      | -0.0509918      | -0.4189128  | 4.9415784    | 10              | a   | 24.08  | 0.01391 | YES     | YES     |     |     |
| H                      | 1.5249020       | -0.7879262  | 5.6948899    | 11              | a   | 25.01  | 0.01446 | YES     | YES     |     |     |
| H                      | -5.1358423      | -2.2484906  | 1.7386112    | 12              | a   | 30.07  | 0.01132 | YES     | YES     |     |     |
| H                      | -3.4186596      | -2.5934853  | 2.0841715    | 13              | a   | 43.50  | 0.20431 | YES     | YES     |     |     |
| H                      | -4.0818874      | -2.8916105  | 0.4491091    | 14              | a   | 47.57  | 0.02244 | YES     | YES     |     |     |
| H                      | 3.8916817       | 1.7516535   | -1.8903867   | 15              | a   | 49.84  | 0.11547 | YES     | YES     |     |     |
| H                      | 2.5962604       | 2.9884477   | -1.7966340   | 16              | a   | 54.74  | 0.18745 | YES     | YES     |     |     |
| H                      | 3.4642112       | 2.7116727   | -3.3283781   | 17              | a   | 61.39  | 0.04264 | YES     | YES     |     |     |
| H                      | -1.1587074      | 2.6144047   | -2.7322509   | 18              | a   | 64.51  | 0.11405 | YES     | YES     |     |     |
| H                      | 0.0645703       | 3.4070315   | -3.7613160   | 19              | a   | 72.10  | 0.01447 | YES     | YES     |     |     |
| H                      | 0.3251144       | 3.2902858   | -1.9990912   | 20              | a   | 74.05  | 0.29654 | YES     | YES     |     |     |
| H                      | -1.7808217      | -0.9452952  | -3.6743984   | 21              | a   | 77.28  | 0.24444 | YES     | YES     |     |     |
| H                      | -1.5050930      | 0.0460454   | -5.1357081   | 22              | a   | 85.44  | 0.35523 | YES     | YES     |     |     |
| H                      | -2.0388980      | 0.8235435   | -3.6198515   | 23              | a   | 87.77  | 0.06178 | YES     | YES     |     |     |
| H                      | -0.1065523      | -2.5552574  | -4.0285117   | 24              | a   | 91.31  | 0.13189 | YES     | YES     |     |     |
| H                      | 1.6425597       | -2.8577565  | -3.8025493   | 25              | a   | 92.84  | 0.08631 | YES     | YES     |     |     |
| H                      | 1.0415859       | -2.1930911  | -5.3467410   | 26              | a   | 96.22  | 0.08109 | YES     | YES     |     |     |
| H                      | 3.5491714       | -1.9390085  | -2.9806366   | 27              | a   | 96.57  | 0.17043 | YES     | YES     |     |     |
| H                      | 4.3059873       | -0.4124711  | -2.4370762   | 28              | a   | 100.11 | 0.10504 | YES     | YES     |     |     |
| H                      | 4.1671472       | -0.7713018  | -4.1804181   | 29              | a   | 103.22 | 0.14793 | YES     | YES     |     |     |
| TI                     | 0.0067388       | -2.3679929  | -0.0013254   | 30              | a   | 104.16 | 0.23909 | YES     | YES     |     |     |
|                        |                 |             |              | 31              | a   | 107.74 | 0.07916 | YES     | YES     |     |     |
| SCF energy GEOOPT =    | -2069.456513958 | H           |              | 32              | a   | 110.73 | 0.03051 | YES     | YES     |     |     |
| ZPE =                  | 1702.           | kJ/mol      |              | 33              | a   | 112.93 | 0.25330 | YES     | YES     |     |     |
| FREEH energy =         | 1828.89         | kJ/mol      |              | 34              | a   | 144.49 | 0.00860 | YES     | YES     |     |     |
| FREEH entropy =        | 1.20231         | kJ/mol/K    |              | 35              | a   | 146.74 | 0.00166 | YES     | YES     |     |     |
|                        |                 |             |              | 36              | a   | 150.53 | 0.14790 | YES     | YES     |     |     |
| \$vibrational spectrum |                 |             |              | 37              | a   | 155.67 | 0.04227 | YES     | YES     |     |     |
| # mode                 | symmetry        | wave number | IR intensity | selection rules | 38  | a      | 157.38  | 0.05260 | YES     | YES |     |
| #                      | cm**(-1)        | km/mol      | IR           | RAMAN           | 39  | a      | 159.88  | 0.00338 | YES     | YES |     |
| 1                      | -0.00           | 0.00000     | -            | -               | 40  | a      | 161.77  | 0.21812 | YES     | YES |     |
| 2                      | -0.00           | 0.00000     | -            | -               | 41  | a      | 169.96  | 0.24117 | YES     | YES |     |
| 3                      | -0.00           | 0.00000     | -            | -               | 42  | a      | 171.71  | 0.22889 | YES     | YES |     |
| 4                      | -0.00           | 0.00000     | -            | -               | 43  | a      | 186.40  | 1.04041 | YES     | YES |     |
| 5                      | -0.00           | 0.00000     | -            | -               | 44  | a      | 187.19  | 0.97880 | YES     | YES |     |
| 6                      | -0.00           | 0.00000     | -            | -               | 45  | a      | 188.35  | 0.43176 | YES     | YES |     |
| 7                      | a               | 14.90       | 0.05186      | YES             | YES | 46     | a       | 205.05  | 0.99404 | YES | YES |
| 8                      | a               | 16.42       | 0.03324      | YES             | YES | 47     | a       | 217.94  | 4.88926 | YES | YES |
| 9                      | a               | 19.46       | 0.02358      | YES             | YES | 48     | a       | 218.22  | 5.03397 | YES | YES |

|    |   |        |           |     |     |     |   |         |          |     |     |
|----|---|--------|-----------|-----|-----|-----|---|---------|----------|-----|-----|
| 49 | a | 223.88 | 4.42410   | YES | YES | 88  | a | 598.52  | 0.20244  | YES | YES |
| 50 | a | 230.33 | 2.16994   | YES | YES | 89  | a | 599.04  | 0.05311  | YES | YES |
| 51 | a | 231.01 | 2.31891   | YES | YES | 90  | a | 599.28  | 0.03163  | YES | YES |
| 52 | a | 271.06 | 0.07472   | YES | YES | 91  | a | 797.32  | 2.63377  | YES | YES |
| 53 | a | 271.87 | 0.01420   | YES | YES | 92  | a | 797.67  | 2.90215  | YES | YES |
| 54 | a | 272.94 | 0.11615   | YES | YES | 93  | a | 798.68  | 3.03780  | YES | YES |
| 55 | a | 274.25 | 0.05478   | YES | YES | 94  | a | 801.28  | 3.26867  | YES | YES |
| 56 | a | 274.93 | 0.31750   | YES | YES | 95  | a | 802.20  | 3.23794  | YES | YES |
| 57 | a | 277.08 | 0.09643   | YES | YES | 96  | a | 802.94  | 2.74213  | YES | YES |
| 58 | a | 279.72 | 0.07592   | YES | YES | 97  | a | 921.17  | 0.09428  | YES | YES |
| 59 | a | 281.67 | 0.63231   | YES | YES | 98  | a | 922.45  | 0.75422  | YES | YES |
| 60 | a | 282.49 | 0.40026   | YES | YES | 99  | a | 924.25  | 0.55678  | YES | YES |
| 61 | a | 284.40 | 0.22389   | YES | YES | 100 | a | 925.20  | 0.11571  | YES | YES |
| 62 | a | 285.87 | 0.78546   | YES | YES | 101 | a | 926.28  | 0.26941  | YES | YES |
| 63 | a | 287.89 | 0.81503   | YES | YES | 102 | a | 927.48  | 0.30849  | YES | YES |
| 64 | a | 378.38 | 0.21864   | YES | YES | 103 | a | 987.76  | 11.92751 | YES | YES |
| 65 | a | 380.87 | 23.40824  | YES | YES | 104 | a | 987.92  | 3.55571  | YES | YES |
| 66 | a | 381.05 | 23.70502  | YES | YES | 105 | a | 988.04  | 3.53110  | YES | YES |
| 67 | a | 392.00 | 2.56755   | YES | YES | 106 | a | 992.10  | 5.94634  | YES | YES |
| 68 | a | 392.53 | 1.57778   | YES | YES | 107 | a | 992.56  | 5.66712  | YES | YES |
| 69 | a | 392.81 | 3.59138   | YES | YES | 108 | a | 993.21  | 5.16032  | YES | YES |
| 70 | a | 450.07 | 327.49208 | YES | YES | 109 | a | 994.68  | 0.69713  | YES | YES |
| 71 | a | 450.50 | 327.27913 | YES | YES | 110 | a | 995.09  | 0.92257  | YES | YES |
| 72 | a | 496.39 | 32.81921  | YES | YES | 111 | a | 995.88  | 1.47957  | YES | YES |
| 73 | a | 543.02 | 0.12933   | YES | YES | 112 | a | 998.03  | 0.12703  | YES | YES |
| 74 | a | 543.57 | 0.07618   | YES | YES | 113 | a | 998.94  | 0.24709  | YES | YES |
| 75 | a | 544.02 | 0.00781   | YES | YES | 114 | a | 999.50  | 0.05155  | YES | YES |
| 76 | a | 544.24 | 0.11061   | YES | YES | 115 | a | 1000.17 | 0.18387  | YES | YES |
| 77 | a | 544.29 | 0.07320   | YES | YES | 116 | a | 1000.69 | 0.39937  | YES | YES |
| 78 | a | 544.54 | 0.07106   | YES | YES | 117 | a | 1001.18 | 1.05432  | YES | YES |
| 79 | a | 546.27 | 0.12753   | YES | YES | 118 | a | 1048.12 | 3.06225  | YES | YES |
| 80 | a | 546.84 | 0.08193   | YES | YES | 119 | a | 1048.36 | 3.28001  | YES | YES |
| 81 | a | 547.02 | 0.11237   | YES | YES | 120 | a | 1048.48 | 3.12421  | YES | YES |
| 82 | a | 585.43 | 2.50485   | YES | YES | 121 | a | 1050.27 | 0.14022  | YES | YES |
| 83 | a | 585.74 | 2.50091   | YES | YES | 122 | a | 1050.50 | 0.23279  | YES | YES |
| 84 | a | 586.31 | 2.65928   | YES | YES | 123 | a | 1050.77 | 0.13202  | YES | YES |
| 85 | a | 589.76 | 6.61409   | YES | YES | 124 | a | 1074.06 | 0.11931  | YES | YES |
| 86 | a | 589.85 | 6.21618   | YES | YES | 125 | a | 1074.73 | 0.09548  | YES | YES |
| 87 | a | 591.46 | 1.08637   | YES | YES | 126 | a | 1077.12 | 0.02094  | YES | YES |

|     |   |         |          |     |     |     |   |         |           |     |     |
|-----|---|---------|----------|-----|-----|-----|---|---------|-----------|-----|-----|
| 127 | a | 1163.60 | 0.04848  | YES | YES | 166 | a | 1405.70 | 4.76065   | YES | YES |
| 128 | a | 1163.74 | 0.02455  | YES | YES | 167 | a | 1406.20 | 3.20791   | YES | YES |
| 129 | a | 1163.97 | 0.02651  | YES | YES | 168 | a | 1407.25 | 10.78501  | YES | YES |
| 130 | a | 1165.33 | 0.09095  | YES | YES | 169 | a | 1408.70 | 2.43694   | YES | YES |
| 131 | a | 1165.66 | 0.41821  | YES | YES | 170 | a | 1409.46 | 27.13331  | YES | YES |
| 132 | a | 1165.86 | 0.33183  | YES | YES | 171 | a | 1409.57 | 30.10726  | YES | YES |
| 133 | a | 1338.56 | 0.01421  | YES | YES | 172 | a | 1410.49 | 8.66265   | YES | YES |
| 134 | a | 1339.91 | 0.66152  | YES | YES | 173 | a | 1410.62 | 17.17076  | YES | YES |
| 135 | a | 1340.45 | 0.63465  | YES | YES | 174 | a | 1411.84 | 3.64102   | YES | YES |
| 136 | a | 1340.65 | 0.73750  | YES | YES | 175 | a | 1413.81 | 106.01647 | YES | YES |
| 137 | a | 1341.40 | 1.42826  | YES | YES | 176 | a | 1414.18 | 93.79131  | YES | YES |
| 138 | a | 1341.99 | 0.87399  | YES | YES | 177 | a | 1414.85 | 23.28374  | YES | YES |
| 139 | a | 1344.84 | 5.27725  | YES | YES | 178 | a | 1435.55 | 0.83120   | YES | YES |
| 140 | a | 1345.62 | 4.64435  | YES | YES | 179 | a | 1436.16 | 0.31452   | YES | YES |
| 141 | a | 1346.32 | 5.57866  | YES | YES | 180 | a | 1436.63 | 0.54115   | YES | YES |
| 142 | a | 1348.34 | 2.72338  | YES | YES | 181 | a | 1444.94 | 0.00564   | YES | YES |
| 143 | a | 1349.14 | 13.66501 | YES | YES | 182 | a | 1446.86 | 0.16853   | YES | YES |
| 144 | a | 1349.35 | 8.60525  | YES | YES | 183 | a | 1447.13 | 0.15232   | YES | YES |
| 145 | a | 1351.20 | 1.14280  | YES | YES | 184 | a | 1450.24 | 0.47647   | YES | YES |
| 146 | a | 1351.82 | 0.38395  | YES | YES | 185 | a | 1450.41 | 0.31683   | YES | YES |
| 147 | a | 1353.41 | 2.78601  | YES | YES | 186 | a | 1451.05 | 0.39113   | YES | YES |
| 148 | a | 1383.88 | 1.47143  | YES | YES | 187 | a | 1480.24 | 26.16181  | YES | YES |
| 149 | a | 1384.33 | 1.23629  | YES | YES | 188 | a | 1480.35 | 5.76572   | YES | YES |
| 150 | a | 1384.85 | 0.61032  | YES | YES | 189 | a | 1480.71 | 9.29490   | YES | YES |
| 151 | a | 1388.87 | 0.23487  | YES | YES | 190 | a | 1488.42 | 2.81200   | YES | YES |
| 152 | a | 1389.06 | 0.54766  | YES | YES | 191 | a | 1488.74 | 19.89221  | YES | YES |
| 153 | a | 1389.90 | 0.22977  | YES | YES | 192 | a | 1488.87 | 20.72391  | YES | YES |
| 154 | a | 1394.71 | 18.66554 | YES | YES | 193 | a | 2963.87 | 20.35635  | YES | YES |
| 155 | a | 1395.32 | 0.94565  | YES | YES | 194 | a | 2963.90 | 25.65527  | YES | YES |
| 156 | a | 1395.53 | 1.83896  | YES | YES | 195 | a | 2963.94 | 17.01050  | YES | YES |
| 157 | a | 1397.27 | 2.52848  | YES | YES | 196 | a | 2965.33 | 28.99203  | YES | YES |
| 158 | a | 1397.62 | 0.72501  | YES | YES | 197 | a | 2965.41 | 20.10996  | YES | YES |
| 159 | a | 1398.14 | 1.83517  | YES | YES | 198 | a | 2965.58 | 14.87014  | YES | YES |
| 160 | a | 1399.94 | 1.05672  | YES | YES | 199 | a | 2965.64 | 15.23362  | YES | YES |
| 161 | a | 1400.60 | 12.33613 | YES | YES | 200 | a | 2965.69 | 8.86204   | YES | YES |
| 162 | a | 1401.11 | 12.37257 | YES | YES | 201 | a | 2965.85 | 4.52566   | YES | YES |
| 163 | a | 1402.75 | 1.82963  | YES | YES | 202 | a | 2966.56 | 24.37442  | YES | YES |
| 164 | a | 1403.33 | 3.25656  | YES | YES | 203 | a | 2966.86 | 27.65889  | YES | YES |
| 165 | a | 1403.46 | 2.96143  | YES | YES | 204 | a | 2966.95 | 17.97930  | YES | YES |

|     |   |         |          |     |     |
|-----|---|---------|----------|-----|-----|
| 205 | a | 2967.18 | 7.46689  | YES | YES |
| 206 | a | 2967.69 | 1.52960  | YES | YES |
| 207 | a | 2967.74 | 23.40397 | YES | YES |
| 208 | a | 3036.17 | 4.99674  | YES | YES |
| 209 | a | 3036.33 | 4.79770  | YES | YES |
| 210 | a | 3036.55 | 4.99775  | YES | YES |
| 211 | a | 3039.00 | 5.57960  | YES | YES |
| 212 | a | 3039.24 | 8.53195  | YES | YES |
| 213 | a | 3039.65 | 8.90651  | YES | YES |
| 214 | a | 3040.64 | 0.72048  | YES | YES |
| 215 | a | 3040.83 | 2.32882  | YES | YES |
| 216 | a | 3040.88 | 3.86823  | YES | YES |
| 217 | a | 3040.97 | 1.31029  | YES | YES |
| 218 | a | 3041.23 | 4.02993  | YES | YES |
| 219 | a | 3041.71 | 1.64473  | YES | YES |
| 220 | a | 3042.00 | 0.66230  | YES | YES |
| 221 | a | 3042.14 | 0.78307  | YES | YES |
| 222 | a | 3042.30 | 0.27781  | YES | YES |
| 223 | a | 3067.23 | 4.44447  | YES | YES |
| 224 | a | 3067.56 | 4.22567  | YES | YES |
| 225 | a | 3068.06 | 4.51668  | YES | YES |
| 226 | a | 3069.04 | 5.78815  | YES | YES |
| 227 | a | 3069.41 | 2.85787  | YES | YES |
| 228 | a | 3069.78 | 7.52031  | YES | YES |
| 229 | a | 3069.88 | 0.71899  | YES | YES |
| 230 | a | 3070.02 | 5.22561  | YES | YES |
| 231 | a | 3070.24 | 4.72727  | YES | YES |
| 232 | a | 3072.34 | 6.14405  | YES | YES |
| 233 | a | 3072.49 | 7.42927  | YES | YES |
| 234 | a | 3072.69 | 14.71507 | YES | YES |
| 235 | a | 3078.83 | 3.11269  | YES | YES |
| 236 | a | 3080.29 | 3.18090  | YES | YES |
| 237 | a | 3080.55 | 3.31488  | YES | YES |

\$end

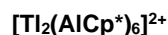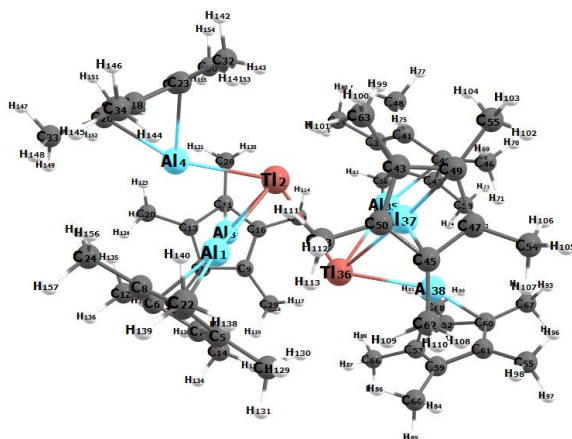

Method: (RI-)BP86(D3BJ)/def2-SVP

Symmetry: c1

Cartesian coordinates in Ångström:

Al 2.2629598 -1.4265453 1.2959558  
 Ti 1.3187600 -0.0278342 -0.9934359  
 Al 2.2381120 1.6415384 1.1531365  
 Al 4.1764699 -0.1134648 -0.6103345  
 C 1.4976589 -2.6127827 3.1123688  
 C 3.4463597 -1.3348452 3.1719710  
 C 2.0526976 -1.3558823 3.5385600  
 C 3.7486926 -2.5829350 2.5180856  
 C 1.2968553 3.3287817 2.3824139  
 C 2.5473885 -3.3740566 2.4792818  
 C 2.6431033 3.7489349 0.5246096  
 C 4.4416987 -0.2528042 3.4633455  
 C 3.5065758 3.4227990 1.6291599  
 C 1.3049216 -0.2695792 4.2509222  
 C 2.6726037 3.1724900 2.7855883  
 C 1.2818164 3.6882489 0.9933410  
 C 0.0904316 -3.0615320 3.3871581  
 C 5.4247085 -1.6023833 -1.7779008  
 C 0.0640459 4.0136456 0.1885648  
 C 5.0061940 3.4266999 1.6164838  
 C 3.1558597 3.0449006 4.2000241

C 2.4720415 -4.7846707 1.9714141  
 C 4.5688649 -0.9116082 -2.7036216  
 C 5.1108639 -3.0191585 2.0745995  
 C 4.9086822 0.4878868 -2.6798215  
 C 6.2869214 -0.6260664 -1.1574667  
 C 5.9664293 0.6708719 -1.7234812  
 C 3.0718667 4.1044344 -0.8677821  
 C 0.0918992 3.2286099 3.2705820  
 C 4.2739138 1.5418114 -3.5367137  
 C 6.7325033 1.9344633 -1.4658960  
 C 3.5490951 -1.5526157 -3.5964806  
 C 7.4326913 -0.8936889 -0.2248812  
 C 5.4247603 -3.0868957 -1.5576744  
 Al -2.2628747 1.4266964 -1.2960576  
 Ti -1.3186166 0.0280053 0.9933134  
 Al -2.2380068 -1.6413894 -1.1532223  
 Al -4.1763243 0.1136115 0.6102780  
 C -1.4975893 2.6129529 -3.1124619  
 C -3.4462864 1.3350087 -3.1720635  
 C -2.0526251 1.3560534 -3.5386599  
 C -3.7486197 2.5830919 -2.5181646  
 C -1.2967498 -3.3286249 -2.3825169  
 C -2.5473151 3.3742185 -2.4793599  
 C -2.6429967 -3.7487891 -0.5247133  
 C -4.4416217 0.2529667 -3.4634419  
 C -3.5064691 -3.4226452 -1.6292627  
 C -1.3048448 0.2697604 -4.2510330  
 C -2.6724969 -3.1723304 -2.7856901  
 C -1.2817081 -3.6880982 -0.9934468  
 C -0.0903636 3.0617086 -3.3872480  
 C -5.4245599 1.6025125 1.7778683  
 C -0.0639379 -4.0135058 -0.1886780  
 C -5.0060869 -3.4265514 -1.6165843  
 C -3.1557535 -3.0447313 -4.2001246  
 C -2.4719714 4.7848291 -1.9714843  
 C -4.5687085 0.9117265 2.7035754  
 C -5.1107883 3.0192996 -2.0746557  
 C -4.9085220 -0.4877689 2.6797587  
 C -6.2867762 0.6262021 1.1574304

|   |            |            |            |   |            |            |            |
|---|------------|------------|------------|---|------------|------------|------------|
| C | -5.9662752 | -0.6707437 | 1.7234228  | H | 0.2391176  | -4.2355671 | -3.6012397 |
| C | -3.0717643 | -4.1043047 | 0.8676716  | H | 0.7641104  | -2.7567537 | -2.7475329 |
| C | -0.0917947 | -3.2284454 | -3.2706865 | H | -4.2106870 | -2.7194005 | -4.2552207 |
| C | -4.2737453 | -1.5417015 | 3.5366340  | H | -3.1001576 | -4.0354744 | -4.6993539 |
| C | -6.7323500 | -1.9343326 | 1.4658289  | H | -2.5451781 | -2.3472934 | -4.8041808 |
| C | -3.5489329 | 1.5527226  | 3.5964358  | H | -5.4015272 | -4.4268710 | -1.8915288 |
| C | -7.4325549 | 0.8938336  | 0.2248588  | H | -5.4277644 | -2.6966038 | -2.3341829 |
| C | -5.4246159 | 3.0870274  | 1.5576588  | H | -5.4039936 | -3.1808257 | -0.6148202 |
| H | -3.9402321 | -0.6890912 | -3.7428699 | H | -4.0943738 | -3.7398263 | 1.0795516  |
| H | -5.1061204 | 0.5382531  | -4.3057099 | H | -2.3964907 | -3.6700364 | 1.6308522  |
| H | -5.0920627 | 0.0446847  | -2.5882312 | H | -3.0766632 | -5.2046169 | 1.0139554  |
| H | -5.6934461 | 2.1767076  | -1.6539969 | H | 0.8459213  | -3.5429626 | -0.6080553 |
| H | -5.6904439 | 3.4178933  | -2.9341539 | H | 0.1064433  | -5.1102736 | -0.1645112 |
| H | -5.0601266 | 3.8180444  | -1.3125160 | H | -0.1633982 | -3.6684982 | 0.8558129  |
| H | -1.4429014 | -0.7104652 | -3.7489803 | H | 0.1635111  | 3.6686203  | -0.8559199 |
| H | -0.2179087 | 0.4738141  | -4.2729060 | H | -0.1063357 | 5.1104127  | 0.1643805  |
| H | -1.6479766 | 0.1594198  | -5.3002831 | H | -0.8458140 | 3.5431057  | 0.6079442  |
| H | 0.6664209  | 2.3743737  | -2.9521623 | H | -0.7640072 | 2.7569228  | 2.7474266  |
| H | 0.1026950  | 4.0725945  | -2.9839222 | H | -0.2390076 | 4.2357347  | 3.6011314  |
| H | 0.0993730  | 3.1076973  | -4.4791957 | H | 0.2947022  | 2.6368019  | 4.1826147  |
| H | -2.8602528 | 4.8828900  | -0.9376241 | H | 2.3966054  | 3.6701342  | -1.6309560 |
| H | -3.0782811 | 5.4590874  | -2.6111037 | H | 4.0944852  | 3.7399746  | -1.0796521 |
| H | -1.4374066 | 5.1717158  | -1.9783462 | H | 3.0767407  | 5.2047434  | -1.0140901 |
| H | -4.5192608 | -2.5614065 | 3.1875007  | H | 5.4041009  | 3.1809754  | 0.6147194  |
| H | -4.6221175 | -1.4577587 | 4.5870583  | H | 5.4278697  | 2.6967502  | 2.3340813  |
| H | -3.1675956 | -1.4470365 | 3.5511641  | H | 5.4016352  | 4.4270188  | 1.8914304  |
| H | -2.6913429 | 0.8791635  | 3.7962840  | H | 2.5452820  | 2.3474695  | 4.8040859  |
| H | -3.9951571 | 1.8108724  | 4.5802861  | H | 3.1002694  | 4.0356486  | 4.6992440  |
| H | -3.1536479 | 2.4901260  | 3.1601180  | H | 4.2107916  | 2.7195643  | 4.2551221  |
| H | -6.1333922 | 3.3838416  | 0.7640538  | H | -0.1026262 | -4.0724242 | 2.9838478  |
| H | -4.4200331 | 3.4666558  | 1.2753151  | H | -0.6663530 | -2.3742045 | 2.9520611  |
| H | -5.7258969 | 3.6178294  | 2.4839208  | H | -0.0993049 | -3.1074984 | 4.4791067  |
| H | -7.4884476 | 0.1549087  | -0.5987840 | H | 0.2179809  | -0.4736124 | 4.2727678  |
| H | -7.3731186 | 1.9014190  | -0.2264440 | H | 1.4430093  | 0.7106455  | 3.7488770  |
| H | -8.3958123 | 0.8395515  | 0.7744519  | H | 1.6480321  | -0.1592497 | 5.3001805  |
| H | -7.1163599 | -1.9859376 | 0.4292535  | H | 5.0921456  | -0.0445326 | 2.5881367  |
| H | -7.6127846 | -1.9942104 | 2.1402191  | H | 5.1061896  | -0.5380876 | 4.3056209  |
| H | -6.1222522 | -2.8386869 | 1.6537461  | H | 3.9403108  | 0.6892579  | 3.7427625  |
| H | -0.2946040 | -2.6366373 | -4.1827178 | H | 1.4374739  | -5.1715488 | 1.9782686  |

|                        |                   |             |              |                 |  |    |   |       |         |     |     |
|------------------------|-------------------|-------------|--------------|-----------------|--|----|---|-------|---------|-----|-----|
| H                      | 3.0783415         | -5.4589293  | 2.6110423    |                 |  | 11 | a | 19.63 | 0.15261 | YES | YES |
| H                      | 2.8603290         | -4.8827403  | 0.9375572    |                 |  | 12 | a | 21.00 | 0.00000 | YES | YES |
| H                      | 3.1537922         | -2.4900028  | -3.1601436   |                 |  | 13 | a | 21.33 | 0.11034 | YES | YES |
| H                      | 3.9953285         | -1.8107970  | -4.5803183   |                 |  | 14 | a | 28.84 | 0.00000 | YES | YES |
| H                      | 2.6915166         | -0.8790506  | -3.7963578   |                 |  | 15 | a | 34.09 | 0.06911 | YES | YES |
| H                      | 4.4201725         | -3.4665205  | -1.2753440   |                 |  | 16 | a | 34.10 | 0.00058 | YES | YES |
| H                      | 6.1335228         | -3.3837004  | -0.7640537   |                 |  | 17 | a | 35.33 | 0.00000 | YES | YES |
| H                      | 5.7260574         | -3.6177084  | -2.4839249   |                 |  | 18 | a | 36.19 | 0.20470 | YES | YES |
| H                      | 8.3959526         | -0.8394252  | -0.7744696   |                 |  | 19 | a | 39.54 | 0.29688 | YES | YES |
| H                      | 7.3732444         | -1.9012650  | 0.2264416    |                 |  | 20 | a | 39.66 | 0.00001 | YES | YES |
| H                      | 7.4885840         | -0.1547475  | 0.5987468    |                 |  | 21 | a | 44.23 | 0.23785 | YES | YES |
| H                      | 6.1224117         | 2.8388156   | -1.6538433   |                 |  | 22 | a | 45.40 | 0.00000 | YES | YES |
| H                      | 7.6129531         | 1.9943256   | -2.1402675   |                 |  | 23 | a | 50.32 | 0.00000 | YES | YES |
| H                      | 7.1164893         | 1.9860875   | -0.4293123   |                 |  | 24 | a | 50.77 | 0.09138 | YES | YES |
| H                      | 3.1677625         | 1.4471611   | -3.5512386   |                 |  | 25 | a | 56.82 | 0.39279 | YES | YES |
| H                      | 4.6222806         | 1.4578439   | -4.5871379   |                 |  | 26 | a | 57.40 | 0.00000 | YES | YES |
| H                      | 4.5194442         | 2.5615199   | -3.1876006   |                 |  | 27 | a | 59.55 | 0.10370 | YES | YES |
| H                      | 5.0602070         | -3.8179151  | 1.3124723    |                 |  | 28 | a | 61.10 | 0.00000 | YES | YES |
| H                      | 5.6905054         | -3.4177417  | 2.9341120    |                 |  | 29 | a | 63.52 | 0.60435 | YES | YES |
| H                      | 5.6935321         | -2.1765768  | 1.6539339    |                 |  | 30 | a | 64.89 | 0.79328 | YES | YES |
|                        |                   |             |              |                 |  | 31 | a | 66.25 | 0.00000 | YES | YES |
| SCF energy GEOOPT =    | -4138.899540142 H |             |              |                 |  | 32 | a | 71.66 | 0.88450 | YES | YES |
| ZPE =                  | 3409. kJ/mol      |             |              |                 |  | 33 | a | 71.72 | 0.00001 | YES | YES |
| FREEH energy =         | 3665.86 kJ/mol    |             |              |                 |  | 34 | a | 73.64 | 1.09495 | YES | YES |
| FREEH entropy =        | 2.15378 kJ/mol/K  |             |              |                 |  | 35 | a | 74.36 | 0.00000 | YES | YES |
|                        |                   |             |              |                 |  | 36 | a | 75.76 | 0.00000 | YES | YES |
| \$vibrational spectrum |                   |             |              |                 |  | 37 | a | 77.54 | 2.30379 | YES | YES |
| # mode                 | symmetry          | wave number | IR intensity | selection rules |  | 38 | a | 78.05 | 0.00001 | YES | YES |
| #                      | cm**(-1)          | km/mol      | IR           | RAMAN           |  | 39 | a | 81.88 | 0.00000 | YES | YES |
| 1                      | -0.00             | 0.00000     | -            | -               |  | 40 | a | 82.86 | 0.58514 | YES | YES |
| 2                      | -0.00             | 0.00000     | -            | -               |  | 41 | a | 85.40 | 1.28614 | YES | YES |
| 3                      | 0.00              | 0.00000     | -            | -               |  | 42 | a | 88.01 | 0.00000 | YES | YES |
| 4                      | 0.00              | 0.00000     | -            | -               |  | 43 | a | 88.52 | 0.00000 | YES | YES |
| 5                      | 0.00              | 0.00000     | -            | -               |  | 44 | a | 89.24 | 0.42381 | YES | YES |
| 6                      | 0.00              | 0.00000     | -            | -               |  | 45 | a | 92.27 | 0.00000 | YES | YES |
| 7                      | a                 | 5.13        | 0.07948      | YES YES         |  | 46 | a | 93.56 | 0.51195 | YES | YES |
| 8                      | a                 | 11.25       | 0.00000      | YES YES         |  | 47 | a | 97.37 | 1.11713 | YES | YES |
| 9                      | a                 | 13.98       | 0.09617      | YES YES         |  | 48 | a | 98.93 | 0.00000 | YES | YES |
| 10                     | a                 | 15.49       | 0.00000      | YES YES         |  | 49 | a | 99.91 | 0.05346 | YES | YES |

|    |   |        |         |     |     |     |   |        |          |     |     |
|----|---|--------|---------|-----|-----|-----|---|--------|----------|-----|-----|
| 50 | a | 101.31 | 0.00000 | YES | YES | 89  | a | 193.14 | 0.40890  | YES | YES |
| 51 | a | 103.05 | 0.01708 | YES | YES | 90  | a | 193.25 | 0.00000  | YES | YES |
| 52 | a | 105.24 | 0.00000 | YES | YES | 91  | a | 201.21 | 9.01975  | YES | YES |
| 53 | a | 108.96 | 0.00000 | YES | YES | 92  | a | 202.31 | 0.00000  | YES | YES |
| 54 | a | 109.83 | 0.65027 | YES | YES | 93  | a | 206.10 | 0.00000  | YES | YES |
| 55 | a | 111.45 | 0.77268 | YES | YES | 94  | a | 209.33 | 7.56922  | YES | YES |
| 56 | a | 112.13 | 0.00000 | YES | YES | 95  | a | 215.43 | 2.09693  | YES | YES |
| 57 | a | 118.33 | 1.07319 | YES | YES | 96  | a | 215.50 | 0.00003  | YES | YES |
| 58 | a | 118.66 | 0.00001 | YES | YES | 97  | a | 218.28 | 7.82417  | YES | YES |
| 59 | a | 129.21 | 0.00869 | YES | YES | 98  | a | 221.58 | 22.00962 | YES | YES |
| 60 | a | 129.23 | 0.15511 | YES | YES | 99  | a | 222.13 | 0.00000  | YES | YES |
| 61 | a | 130.55 | 2.44145 | YES | YES | 100 | a | 224.33 | 0.00006  | YES | YES |
| 62 | a | 131.14 | 0.00000 | YES | YES | 101 | a | 224.46 | 6.97050  | YES | YES |
| 63 | a | 139.35 | 0.00000 | YES | YES | 102 | a | 229.67 | 0.00000  | YES | YES |
| 64 | a | 140.08 | 2.53055 | YES | YES | 103 | a | 263.86 | 0.14966  | YES | YES |
| 65 | a | 140.34 | 0.14014 | YES | YES | 104 | a | 264.09 | 0.00000  | YES | YES |
| 66 | a | 140.87 | 0.00000 | YES | YES | 105 | a | 265.14 | 0.06236  | YES | YES |
| 67 | a | 156.18 | 0.00002 | YES | YES | 106 | a | 265.16 | 0.00001  | YES | YES |
| 68 | a | 156.40 | 1.38847 | YES | YES | 107 | a | 268.60 | 0.00000  | YES | YES |
| 69 | a | 157.62 | 0.19521 | YES | YES | 108 | a | 269.47 | 0.22915  | YES | YES |
| 70 | a | 158.25 | 0.00000 | YES | YES | 109 | a | 269.70 | 0.00000  | YES | YES |
| 71 | a | 160.10 | 1.25410 | YES | YES | 110 | a | 269.88 | 0.86471  | YES | YES |
| 72 | a | 161.24 | 0.00000 | YES | YES | 111 | a | 270.74 | 0.73690  | YES | YES |
| 73 | a | 165.61 | 0.00000 | YES | YES | 112 | a | 271.94 | 0.00000  | YES | YES |
| 74 | a | 167.09 | 0.29243 | YES | YES | 113 | a | 272.77 | 0.39545  | YES | YES |
| 75 | a | 168.92 | 0.52466 | YES | YES | 114 | a | 273.14 | 0.00000  | YES | YES |
| 76 | a | 168.98 | 0.00000 | YES | YES | 115 | a | 277.15 | 0.65949  | YES | YES |
| 77 | a | 172.91 | 0.12433 | YES | YES | 116 | a | 277.88 | 0.00000  | YES | YES |
| 78 | a | 172.97 | 0.00000 | YES | YES | 117 | a | 281.25 | 0.00000  | YES | YES |
| 79 | a | 179.23 | 0.00001 | YES | YES | 118 | a | 281.76 | 1.29836  | YES | YES |
| 80 | a | 179.41 | 0.58596 | YES | YES | 119 | a | 282.51 | 0.41037  | YES | YES |
| 81 | a | 180.88 | 0.71129 | YES | YES | 120 | a | 282.71 | 0.00000  | YES | YES |
| 82 | a | 183.07 | 0.00000 | YES | YES | 121 | a | 284.05 | 0.00000  | YES | YES |
| 83 | a | 187.57 | 2.47358 | YES | YES | 122 | a | 284.75 | 1.48644  | YES | YES |
| 84 | a | 187.77 | 0.00001 | YES | YES | 123 | a | 286.62 | 0.26303  | YES | YES |
| 85 | a | 188.26 | 2.14767 | YES | YES | 124 | a | 286.78 | 0.00000  | YES | YES |
| 86 | a | 188.63 | 0.00000 | YES | YES | 125 | a | 289.49 | 1.77433  | YES | YES |
| 87 | a | 189.22 | 0.00000 | YES | YES | 126 | a | 290.06 | 0.00000  | YES | YES |
| 88 | a | 191.01 | 1.31005 | YES | YES | 127 | a | 366.38 | 10.83773 | YES | YES |



|     |   |        |           |     |     |     |   |        |          |     |     |
|-----|---|--------|-----------|-----|-----|-----|---|--------|----------|-----|-----|
| 128 | a | 367.76 | 0.00001   | YES | YES | 167 | a | 585.53 | 0.00031  | YES | YES |
| 129 | a | 373.03 | 17.05143  | YES | YES | 168 | a | 585.59 | 1.30034  | YES | YES |
| 130 | a | 374.89 | 0.00000   | YES | YES | 169 | a | 586.45 | 22.59256 | YES | YES |
| 131 | a | 377.72 | 0.00000   | YES | YES | 170 | a | 586.55 | 0.00032  | YES | YES |
| 132 | a | 378.83 | 18.03046  | YES | YES | 171 | a | 591.37 | 0.13662  | YES | YES |
| 133 | a | 380.50 | 13.55802  | YES | YES | 172 | a | 591.37 | 4.31697  | YES | YES |
| 134 | a | 381.47 | 0.00000   | YES | YES | 173 | a | 592.87 | 5.75808  | YES | YES |
| 135 | a | 384.16 | 7.89991   | YES | YES | 174 | a | 593.04 | 0.00003  | YES | YES |
| 136 | a | 384.82 | 0.00000   | YES | YES | 175 | a | 594.08 | 15.55548 | YES | YES |
| 137 | a | 392.54 | 0.00000   | YES | YES | 176 | a | 594.18 | 0.00005  | YES | YES |
| 138 | a | 393.00 | 4.22449   | YES | YES | 177 | a | 594.97 | 10.97109 | YES | YES |
| 139 | a | 433.22 | 0.00001   | YES | YES | 178 | a | 595.38 | 0.00000  | YES | YES |
| 140 | a | 435.35 | 557.32717 | YES | YES | 179 | a | 596.87 | 10.60876 | YES | YES |
| 141 | a | 440.04 | 0.00001   | YES | YES | 180 | a | 597.18 | 0.00000  | YES | YES |
| 142 | a | 443.50 | 403.84361 | YES | YES | 181 | a | 795.66 | 0.00000  | YES | YES |
| 143 | a | 466.00 | 337.40917 | YES | YES | 182 | a | 795.82 | 4.07705  | YES | YES |
| 144 | a | 480.97 | 0.00000   | YES | YES | 183 | a | 799.10 | 0.00000  | YES | YES |
| 145 | a | 541.26 | 0.00001   | YES | YES | 184 | a | 799.22 | 4.14353  | YES | YES |
| 146 | a | 541.31 | 0.62164   | YES | YES | 185 | a | 800.43 | 0.00002  | YES | YES |
| 147 | a | 543.14 | 0.00000   | YES | YES | 186 | a | 800.53 | 4.82541  | YES | YES |
| 148 | a | 543.18 | 0.44269   | YES | YES | 187 | a | 802.37 | 0.96012  | YES | YES |
| 149 | a | 543.55 | 0.00000   | YES | YES | 188 | a | 802.72 | 0.00000  | YES | YES |
| 150 | a | 543.60 | 0.88061   | YES | YES | 189 | a | 803.10 | 18.13349 | YES | YES |
| 151 | a | 544.33 | 0.79204   | YES | YES | 190 | a | 803.14 | 0.00032  | YES | YES |
| 152 | a | 544.37 | 0.00001   | YES | YES | 191 | a | 806.67 | 4.83740  | YES | YES |
| 153 | a | 545.51 | 0.03848   | YES | YES | 192 | a | 806.79 | 0.00006  | YES | YES |
| 154 | a | 545.55 | 0.00000   | YES | YES | 193 | a | 918.89 | 2.73260  | YES | YES |
| 155 | a | 545.84 | 0.03894   | YES | YES | 194 | a | 919.20 | 0.00001  | YES | YES |
| 156 | a | 546.14 | 0.00000   | YES | YES | 195 | a | 919.51 | 0.00000  | YES | YES |
| 157 | a | 547.81 | 0.00476   | YES | YES | 196 | a | 919.90 | 1.86859  | YES | YES |
| 158 | a | 547.81 | 0.73820   | YES | YES | 197 | a | 920.21 | 0.00025  | YES | YES |
| 159 | a | 549.10 | 0.00000   | YES | YES | 198 | a | 920.25 | 1.66766  | YES | YES |
| 160 | a | 549.24 | 0.15870   | YES | YES | 199 | a | 928.91 | 0.00001  | YES | YES |
| 161 | a | 549.50 | 0.00009   | YES | YES | 200 | a | 929.11 | 3.25470  | YES | YES |
| 162 | a | 549.51 | 0.13762   | YES | YES | 201 | a | 930.55 | 1.71549  | YES | YES |
| 163 | a | 578.59 | 0.70137   | YES | YES | 202 | a | 931.01 | 0.00000  | YES | YES |
| 164 | a | 578.60 | 0.03188   | YES | YES | 203 | a | 940.46 | 0.00019  | YES | YES |
| 165 | a | 582.05 | 8.29036   | YES | YES | 204 | a | 940.55 | 1.19991  | YES | YES |
| 166 | a | 582.06 | 0.18057   | YES | YES | 205 | a | 984.61 | 8.24329  | YES | YES |

|     |   |         |          |     |     |     |   |         |          |     |     |
|-----|---|---------|----------|-----|-----|-----|---|---------|----------|-----|-----|
| 206 | a | 984.75  | 0.00002  | YES | YES | 245 | a | 1052.00 | 2.74485  | YES | YES |
| 207 | a | 986.96  | 15.63814 | YES | YES | 246 | a | 1052.45 | 0.00000  | YES | YES |
| 208 | a | 986.99  | 0.00711  | YES | YES | 247 | a | 1073.32 | 0.00000  | YES | YES |
| 209 | a | 989.30  | 8.71965  | YES | YES | 248 | a | 1073.67 | 0.69513  | YES | YES |
| 210 | a | 989.40  | 0.00010  | YES | YES | 249 | a | 1075.09 | 2.12634  | YES | YES |
| 211 | a | 990.84  | 7.28615  | YES | YES | 250 | a | 1075.31 | 0.00001  | YES | YES |
| 212 | a | 990.88  | 0.00208  | YES | YES | 251 | a | 1076.35 | 1.00484  | YES | YES |
| 213 | a | 991.59  | 3.37691  | YES | YES | 252 | a | 1076.42 | 0.00003  | YES | YES |
| 214 | a | 991.61  | 0.00139  | YES | YES | 253 | a | 1162.24 | 0.03880  | YES | YES |
| 215 | a | 993.09  | 0.00160  | YES | YES | 254 | a | 1162.24 | 1.13311  | YES | YES |
| 216 | a | 993.12  | 4.94817  | YES | YES | 255 | a | 1163.24 | 0.00001  | YES | YES |
| 217 | a | 993.21  | 5.28694  | YES | YES | 256 | a | 1163.37 | 0.48593  | YES | YES |
| 218 | a | 993.32  | 0.00011  | YES | YES | 257 | a | 1164.09 | 0.00000  | YES | YES |
| 219 | a | 994.12  | 1.57048  | YES | YES | 258 | a | 1164.17 | 0.44961  | YES | YES |
| 220 | a | 994.12  | 0.00009  | YES | YES | 259 | a | 1165.01 | 0.58352  | YES | YES |
| 221 | a | 994.80  | 1.72117  | YES | YES | 260 | a | 1165.31 | 0.00000  | YES | YES |
| 222 | a | 994.81  | 0.00964  | YES | YES | 261 | a | 1167.60 | 1.09200  | YES | YES |
| 223 | a | 997.06  | 0.00000  | YES | YES | 262 | a | 1167.63 | 0.00019  | YES | YES |
| 224 | a | 997.51  | 0.52739  | YES | YES | 263 | a | 1170.83 | 0.00000  | YES | YES |
| 225 | a | 998.66  | 1.67755  | YES | YES | 264 | a | 1171.05 | 0.33560  | YES | YES |
| 226 | a | 998.88  | 0.00000  | YES | YES | 265 | a | 1337.42 | 0.00000  | YES | YES |
| 227 | a | 999.99  | 0.53902  | YES | YES | 266 | a | 1337.68 | 3.29875  | YES | YES |
| 228 | a | 999.99  | 0.00274  | YES | YES | 267 | a | 1339.18 | 3.64410  | YES | YES |
| 229 | a | 1002.00 | 0.00000  | YES | YES | 268 | a | 1339.21 | 0.00016  | YES | YES |
| 230 | a | 1002.02 | 0.01994  | YES | YES | 269 | a | 1339.51 | 0.20266  | YES | YES |
| 231 | a | 1003.06 | 0.65587  | YES | YES | 270 | a | 1339.98 | 0.00000  | YES | YES |
| 232 | a | 1003.50 | 0.00000  | YES | YES | 271 | a | 1340.63 | 1.52930  | YES | YES |
| 233 | a | 1005.29 | 0.00000  | YES | YES | 272 | a | 1340.89 | 0.00000  | YES | YES |
| 234 | a | 1005.52 | 0.21210  | YES | YES | 273 | a | 1341.14 | 3.57143  | YES | YES |
| 235 | a | 1046.92 | 0.00000  | YES | YES | 274 | a | 1341.42 | 0.00000  | YES | YES |
| 236 | a | 1047.22 | 3.65884  | YES | YES | 275 | a | 1342.52 | 3.44987  | YES | YES |
| 237 | a | 1048.72 | 0.00001  | YES | YES | 276 | a | 1342.61 | 0.00000  | YES | YES |
| 238 | a | 1048.89 | 4.02535  | YES | YES | 277 | a | 1343.39 | 0.00000  | YES | YES |
| 239 | a | 1049.06 | 0.40757  | YES | YES | 278 | a | 1344.31 | 0.81239  | YES | YES |
| 240 | a | 1049.08 | 0.00017  | YES | YES | 279 | a | 1344.85 | 13.40646 | YES | YES |
| 241 | a | 1050.42 | 1.12311  | YES | YES | 280 | a | 1345.01 | 0.00005  | YES | YES |
| 242 | a | 1050.64 | 0.00000  | YES | YES | 281 | a | 1346.02 | 17.32133 | YES | YES |
| 243 | a | 1051.09 | 1.88726  | YES | YES | 282 | a | 1346.09 | 0.00104  | YES | YES |
| 244 | a | 1051.17 | 0.00000  | YES | YES | 283 | a | 1346.79 | 14.59009 | YES | YES |

|     |   |         |          |     |     |     |   |         |           |     |     |
|-----|---|---------|----------|-----|-----|-----|---|---------|-----------|-----|-----|
| 284 | a | 1347.09 | 0.00004  | YES | YES | 323 | a | 1401.07 | 0.00002   | YES | YES |
| 285 | a | 1347.65 | 14.43115 | YES | YES | 324 | a | 1401.22 | 3.64321   | YES | YES |
| 286 | a | 1348.00 | 0.00006  | YES | YES | 325 | a | 1401.80 | 1.54567   | YES | YES |
| 287 | a | 1349.02 | 0.00197  | YES | YES | 326 | a | 1402.08 | 0.00000   | YES | YES |
| 288 | a | 1349.07 | 14.63373 | YES | YES | 327 | a | 1402.68 | 2.66578   | YES | YES |
| 289 | a | 1350.78 | 0.00000  | YES | YES | 328 | a | 1403.87 | 11.96451  | YES | YES |
| 290 | a | 1351.47 | 0.90306  | YES | YES | 329 | a | 1403.94 | 0.00034   | YES | YES |
| 291 | a | 1352.28 | 0.00001  | YES | YES | 330 | a | 1404.48 | 0.00002   | YES | YES |
| 292 | a | 1352.56 | 1.87933  | YES | YES | 331 | a | 1405.80 | 6.15614   | YES | YES |
| 293 | a | 1353.91 | 3.11760  | YES | YES | 332 | a | 1405.80 | 0.06767   | YES | YES |
| 294 | a | 1353.92 | 0.00294  | YES | YES | 333 | a | 1406.30 | 7.68269   | YES | YES |
| 295 | a | 1380.42 | 0.00002  | YES | YES | 334 | a | 1406.41 | 0.00001   | YES | YES |
| 296 | a | 1380.62 | 6.17916  | YES | YES | 335 | a | 1407.93 | 17.89689  | YES | YES |
| 297 | a | 1381.70 | 4.06903  | YES | YES | 336 | a | 1408.03 | 0.00003   | YES | YES |
| 298 | a | 1382.06 | 0.00000  | YES | YES | 337 | a | 1408.67 | 18.81068  | YES | YES |
| 299 | a | 1383.00 | 0.00000  | YES | YES | 338 | a | 1408.71 | 0.00136   | YES | YES |
| 300 | a | 1383.64 | 12.01632 | YES | YES | 339 | a | 1409.71 | 0.00001   | YES | YES |
| 301 | a | 1387.61 | 0.53153  | YES | YES | 340 | a | 1409.92 | 37.24402  | YES | YES |
| 302 | a | 1387.75 | 0.00001  | YES | YES | 341 | a | 1411.03 | 49.80652  | YES | YES |
| 303 | a | 1390.26 | 0.00001  | YES | YES | 342 | a | 1411.09 | 0.00202   | YES | YES |
| 304 | a | 1390.36 | 9.47947  | YES | YES | 343 | a | 1411.60 | 81.19542  | YES | YES |
| 305 | a | 1390.99 | 0.00000  | YES | YES | 344 | a | 1412.02 | 0.00001   | YES | YES |
| 306 | a | 1391.55 | 8.99693  | YES | YES | 345 | a | 1412.64 | 0.00002   | YES | YES |
| 307 | a | 1391.84 | 3.91140  | YES | YES | 346 | a | 1413.03 | 165.57374 | YES | YES |
| 308 | a | 1393.24 | 0.00000  | YES | YES | 347 | a | 1414.86 | 0.00009   | YES | YES |
| 309 | a | 1393.47 | 3.14781  | YES | YES | 348 | a | 1415.36 | 23.77709  | YES | YES |
| 310 | a | 1393.92 | 0.00000  | YES | YES | 349 | a | 1415.42 | 0.00135   | YES | YES |
| 311 | a | 1394.50 | 0.00000  | YES | YES | 350 | a | 1416.10 | 96.53735  | YES | YES |
| 312 | a | 1395.37 | 7.33843  | YES | YES | 351 | a | 1418.25 | 23.19811  | YES | YES |
| 313 | a | 1395.74 | 0.00004  | YES | YES | 352 | a | 1418.88 | 0.00000   | YES | YES |
| 314 | a | 1395.85 | 1.15981  | YES | YES | 353 | a | 1420.31 | 55.25718  | YES | YES |
| 315 | a | 1395.96 | 0.00000  | YES | YES | 354 | a | 1420.90 | 0.00018   | YES | YES |
| 316 | a | 1396.31 | 15.08295 | YES | YES | 355 | a | 1431.04 | 26.07728  | YES | YES |
| 317 | a | 1397.37 | 0.00002  | YES | YES | 356 | a | 1431.45 | 0.00001   | YES | YES |
| 318 | a | 1398.12 | 26.30243 | YES | YES | 357 | a | 1437.25 | 0.00000   | YES | YES |
| 319 | a | 1398.40 | 17.13530 | YES | YES | 358 | a | 1437.86 | 6.72648   | YES | YES |
| 320 | a | 1398.82 | 0.00005  | YES | YES | 359 | a | 1439.55 | 10.53935  | YES | YES |
| 321 | a | 1399.25 | 49.05136 | YES | YES | 360 | a | 1439.80 | 0.00000   | YES | YES |
| 322 | a | 1399.28 | 0.00256  | YES | YES | 361 | a | 1442.49 | 0.00085   | YES | YES |

|     |   |         |          |     |     |     |   |         |          |     |     |
|-----|---|---------|----------|-----|-----|-----|---|---------|----------|-----|-----|
| 362 | a | 1442.56 | 1.62119  | YES | YES | 401 | a | 2967.01 | 48.99780 | YES | YES |
| 363 | a | 1446.03 | 0.39202  | YES | YES | 402 | a | 2967.04 | 0.00423  | YES | YES |
| 364 | a | 1446.05 | 0.00015  | YES | YES | 403 | a | 2967.54 | 39.26420 | YES | YES |
| 365 | a | 1448.04 | 3.06730  | YES | YES | 404 | a | 2967.56 | 0.00850  | YES | YES |
| 366 | a | 1448.33 | 0.00000  | YES | YES | 405 | a | 2967.62 | 0.13434  | YES | YES |
| 367 | a | 1448.92 | 3.91060  | YES | YES | 406 | a | 2967.63 | 9.51458  | YES | YES |
| 368 | a | 1449.17 | 0.00001  | YES | YES | 407 | a | 2969.46 | 22.45237 | YES | YES |
| 369 | a | 1450.01 | 2.84498  | YES | YES | 408 | a | 2969.47 | 0.05783  | YES | YES |
| 370 | a | 1450.22 | 0.00000  | YES | YES | 409 | a | 2970.88 | 32.42246 | YES | YES |
| 371 | a | 1451.93 | 0.00000  | YES | YES | 410 | a | 2970.89 | 0.06066  | YES | YES |
| 372 | a | 1452.27 | 3.79312  | YES | YES | 411 | a | 2971.03 | 16.35909 | YES | YES |
| 373 | a | 1478.07 | 34.35231 | YES | YES | 412 | a | 2971.04 | 0.15420  | YES | YES |
| 374 | a | 1478.49 | 0.00000  | YES | YES | 413 | a | 2971.72 | 21.43573 | YES | YES |
| 375 | a | 1481.65 | 0.00000  | YES | YES | 414 | a | 2971.73 | 0.07049  | YES | YES |
| 376 | a | 1481.92 | 30.83480 | YES | YES | 415 | a | 3023.00 | 9.16524  | YES | YES |
| 377 | a | 1485.57 | 24.99663 | YES | YES | 416 | a | 3023.02 | 0.00027  | YES | YES |
| 378 | a | 1485.69 | 0.00037  | YES | YES | 417 | a | 3024.30 | 8.77021  | YES | YES |
| 379 | a | 1487.46 | 0.00083  | YES | YES | 418 | a | 3024.31 | 1.60324  | YES | YES |
| 380 | a | 1487.62 | 24.56538 | YES | YES | 419 | a | 3028.20 | 4.58031  | YES | YES |
| 381 | a | 1490.85 | 0.00000  | YES | YES | 420 | a | 3028.20 | 8.49108  | YES | YES |
| 382 | a | 1491.04 | 30.68069 | YES | YES | 421 | a | 3028.52 | 4.53171  | YES | YES |
| 383 | a | 1491.94 | 20.28245 | YES | YES | 422 | a | 3028.53 | 0.00424  | YES | YES |
| 384 | a | 1492.04 | 0.00034  | YES | YES | 423 | a | 3031.51 | 0.01555  | YES | YES |
| 385 | a | 2947.71 | 0.03436  | YES | YES | 424 | a | 3031.51 | 17.38841 | YES | YES |
| 386 | a | 2947.72 | 27.54493 | YES | YES | 425 | a | 3032.99 | 0.29047  | YES | YES |
| 387 | a | 2955.03 | 0.00155  | YES | YES | 426 | a | 3033.00 | 0.00001  | YES | YES |
| 388 | a | 2955.06 | 13.71254 | YES | YES | 427 | a | 3034.24 | 0.00060  | YES | YES |
| 389 | a | 2958.18 | 14.91477 | YES | YES | 428 | a | 3034.25 | 8.37343  | YES | YES |
| 390 | a | 2958.19 | 0.76598  | YES | YES | 429 | a | 3039.10 | 0.08649  | YES | YES |
| 391 | a | 2958.39 | 21.51756 | YES | YES | 430 | a | 3039.10 | 6.56056  | YES | YES |
| 392 | a | 2958.40 | 0.30642  | YES | YES | 431 | a | 3040.37 | 8.53903  | YES | YES |
| 393 | a | 2959.70 | 0.12241  | YES | YES | 432 | a | 3040.38 | 0.00768  | YES | YES |
| 394 | a | 2959.70 | 19.13567 | YES | YES | 433 | a | 3041.71 | 0.13730  | YES | YES |
| 395 | a | 2961.49 | 23.03449 | YES | YES | 434 | a | 3041.72 | 1.69645  | YES | YES |
| 396 | a | 2961.49 | 0.02030  | YES | YES | 435 | a | 3042.25 | 2.91061  | YES | YES |
| 397 | a | 2962.26 | 0.00475  | YES | YES | 436 | a | 3042.26 | 0.03243  | YES | YES |
| 398 | a | 2962.27 | 20.60425 | YES | YES | 437 | a | 3043.85 | 4.40877  | YES | YES |
| 399 | a | 2966.87 | 0.00108  | YES | YES | 438 | a | 3043.85 | 4.54403  | YES | YES |
| 400 | a | 2966.97 | 17.43947 | YES | YES | 439 | a | 3044.84 | 5.70343  | YES | YES |

|     |   |         |          |     |     |
|-----|---|---------|----------|-----|-----|
| 440 | a | 3044.84 | 0.68927  | YES | YES |
| 441 | a | 3045.96 | 0.00386  | YES | YES |
| 442 | a | 3046.03 | 12.28868 | YES | YES |
| 443 | a | 3048.87 | 2.03671  | YES | YES |
| 444 | a | 3048.88 | 0.02543  | YES | YES |
| 445 | a | 3063.24 | 0.26766  | YES | YES |
| 446 | a | 3063.25 | 7.72390  | YES | YES |
| 447 | a | 3066.93 | 0.00418  | YES | YES |
| 448 | a | 3066.99 | 12.00227 | YES | YES |
| 449 | a | 3070.74 | 0.94480  | YES | YES |
| 450 | a | 3070.75 | 3.21091  | YES | YES |
| 451 | a | 3072.04 | 0.00302  | YES | YES |
| 452 | a | 3072.06 | 8.16910  | YES | YES |
| 453 | a | 3073.16 | 1.40792  | YES | YES |
| 454 | a | 3073.16 | 12.80498 | YES | YES |
| 455 | a | 3073.57 | 0.14711  | YES | YES |
| 456 | a | 3073.58 | 8.48294  | YES | YES |
| 457 | a | 3077.18 | 1.05117  | YES | YES |
| 458 | a | 3077.18 | 7.33295  | YES | YES |
| 459 | a | 3078.72 | 0.78943  | YES | YES |
| 460 | a | 3078.72 | 11.08112 | YES | YES |
| 461 | a | 3082.10 | 4.10560  | YES | YES |
| 462 | a | 3082.10 | 0.41173  | YES | YES |
| 463 | a | 3084.01 | 0.42562  | YES | YES |
| 464 | a | 3084.02 | 6.99251  | YES | YES |
| 465 | a | 3085.68 | 0.05418  | YES | YES |
| 466 | a | 3085.69 | 5.63266  | YES | YES |
| 467 | a | 3085.77 | 6.85952  | YES | YES |
| 468 | a | 3085.77 | 0.16259  | YES | YES |
| 469 | a | 3086.53 | 3.36904  | YES | YES |
| 470 | a | 3086.53 | 5.62447  | YES | YES |
| 471 | a | 3088.28 | 4.03702  | YES | YES |
| 472 | a | 3088.29 | 0.02194  | YES | YES |
| 473 | a | 3102.99 | 1.29795  | YES | YES |
| 474 | a | 3103.00 | 0.00566  | YES | YES |

\$end

[(AlCp\*)<sub>4</sub>]

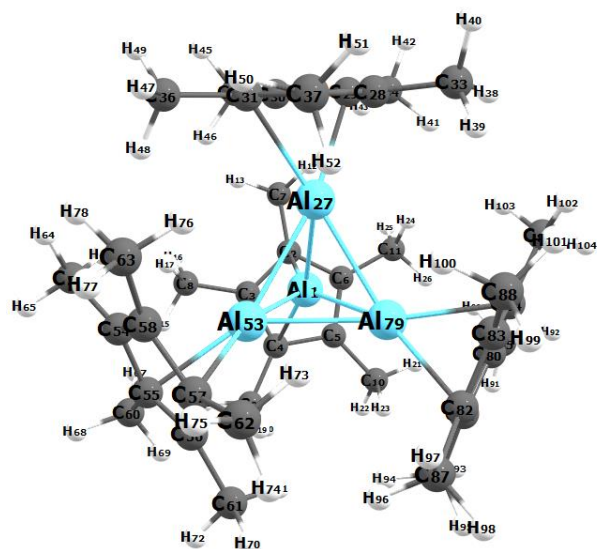

Method: (RI-)BP86(D3BJ)/def2-SVP

Symmetry: c1

Cartesian coordinates in Ångström:

```
Al  4.7942950  5.0790550  7.2666824
C   3.4937503  5.5197319  9.1696205
C   3.2094391  6.5387150  8.1963420
C   4.4165175  7.2857355  7.9697539
C   5.4468136  6.7285630  8.8029617
C   4.8766314  5.6369876  9.5443613
C   2.5047481  4.5438781  9.7408564
C   1.8712026  6.8141755  7.5717900
C   4.5597504  8.4781094  7.0673427
C   6.8552496  7.2368473  8.9238032
C   5.5849219  4.8048530  10.5752064
H   2.9898462  3.5953492  10.0446605
H   1.7072420  4.2922856  9.0142937
H   2.0062888  4.9604880  10.6431677
H   1.9709762  7.2473640  6.5570060
H   1.2862263  7.5375043  8.1806587
H   1.2606496  5.8940985  7.4822615
H   3.8718095  8.4243951  6.2006001
H   5.5893944  8.5729624  6.6696594
H   4.3301681  9.4210080  7.6098794
H   7.5641102  6.4281417  9.1900203
```

```
H   6.9339875  8.0147413  9.7142500
H   7.2111463  7.6938923  7.9794716
H   5.1659618  3.7811542  10.6375342
H   5.4949269  5.2578544  11.5865419
H   6.6665670  4.7090897  10.3556545
```

SCF energy GEOOPT = -632.2715013140 H

ZPE = 563.5 kJ/mol

FREEH energy = 600.57 kJ/mol

FREEH entropy = 0.48100 kJ/mol/K

Vibrational spectrum

| # mode | symmetry | wave number           | IR intensity | selection rules |
|--------|----------|-----------------------|--------------|-----------------|
| #      |          | cm <sup>-1</sup> (-1) | km/mol       | IR RAMAN        |
| 1      |          | -0.00                 | 0.00000      | - -             |
| 2      |          | -0.00                 | 0.00000      | - -             |
| 3      |          | 0.00                  | 0.00000      | - -             |
| 4      |          | 0.00                  | 0.00000      | - -             |
| 5      |          | 0.00                  | 0.00000      | - -             |
| 6      |          | 0.00                  | 0.00000      | - -             |
| 7      | a        | 93.85                 | 0.00098      | YES YES         |
| 8      | a        | 95.73                 | 0.00075      | YES YES         |
| 9      | a        | 110.60                | 0.08440      | YES YES         |
| 10     | a        | 114.26                | 0.08981      | YES YES         |
| 11     | a        | 117.50                | 0.00230      | YES YES         |
| 12     | a        | 150.18                | 0.00005      | YES YES         |
| 13     | a        | 150.35                | 0.00007      | YES YES         |
| 14     | a        | 169.23                | 0.05382      | YES YES         |
| 15     | a        | 169.99                | 0.05312      | YES YES         |
| 16     | a        | 178.31                | 1.61169      | YES YES         |
| 17     | a        | 271.86                | 0.10475      | YES YES         |
| 18     | a        | 274.84                | 0.06538      | YES YES         |
| 19     | a        | 277.00                | 0.43208      | YES YES         |
| 20     | a        | 277.12                | 0.51002      | YES YES         |
| 21     | a        | 379.95                | 3.40203      | YES YES         |
| 22     | a        | 380.09                | 3.39259      | YES YES         |
| 23     | a        | 399.72                | 114.44140    | YES YES         |
| 24     | a        | 542.39                | 0.00004      | YES YES         |
| 25     | a        | 542.54                | 0.00001      | YES YES         |

|    |   |         |          |     |     |       |  |  |  |  |  |
|----|---|---------|----------|-----|-----|-------|--|--|--|--|--|
| 26 | a | 544.07  | 0.00012  | YES | YES |       |  |  |  |  |  |
| 27 | a | 577.25  | 0.00000  | YES | YES |       |  |  |  |  |  |
| 28 | a | 577.32  | 0.00004  | YES | YES |       |  |  |  |  |  |
| 29 | a | 590.72  | 2.79551  | YES | YES |       |  |  |  |  |  |
| 30 | a | 799.98  | 3.83572  | YES | YES |       |  |  |  |  |  |
| 31 | a | 801.13  | 3.81134  | YES | YES |       |  |  |  |  |  |
| 32 | a | 922.45  | 0.00060  | YES | YES |       |  |  |  |  |  |
| 33 | a | 924.03  | 0.00006  | YES | YES |       |  |  |  |  |  |
| 34 | a | 993.91  | 7.15065  | YES | YES |       |  |  |  |  |  |
| 35 | a | 994.11  | 7.15438  | YES | YES |       |  |  |  |  |  |
| 36 | a | 1000.54 | 0.01489  | YES | YES |       |  |  |  |  |  |
| 37 | a | 1000.60 | 0.00621  | YES | YES |       |  |  |  |  |  |
| 38 | a | 1001.10 | 0.05180  | YES | YES |       |  |  |  |  |  |
| 39 | a | 1046.07 | 1.79150  | YES | YES |       |  |  |  |  |  |
| 40 | a | 1046.96 | 1.80373  | YES | YES |       |  |  |  |  |  |
| 41 | a | 1073.46 | 0.00091  | YES | YES |       |  |  |  |  |  |
| 42 | a | 1164.10 | 0.00001  | YES | YES |       |  |  |  |  |  |
| 43 | a | 1164.36 | 0.00008  | YES | YES |       |  |  |  |  |  |
| 44 | a | 1340.17 | 0.16384  | YES | YES |       |  |  |  |  |  |
| 45 | a | 1341.45 | 0.00155  | YES | YES |       |  |  |  |  |  |
| 46 | a | 1346.21 | 1.46406  | YES | YES |       |  |  |  |  |  |
| 47 | a | 1347.46 | 1.44571  | YES | YES |       |  |  |  |  |  |
| 48 | a | 1350.80 | 5.69176  | YES | YES |       |  |  |  |  |  |
| 49 | a | 1391.01 | 0.00038  | YES | YES |       |  |  |  |  |  |
| 50 | a | 1391.12 | 0.00120  | YES | YES |       |  |  |  |  |  |
| 51 | a | 1401.42 | 9.81779  | YES | YES |       |  |  |  |  |  |
| 52 | a | 1401.79 | 9.74744  | YES | YES |       |  |  |  |  |  |
| 53 | a | 1403.42 | 0.23077  | YES | YES |       |  |  |  |  |  |
| 54 | a | 1403.94 | 0.04765  | YES | YES |       |  |  |  |  |  |
| 55 | a | 1405.83 | 0.00103  | YES | YES |       |  |  |  |  |  |
| 56 | a | 1407.80 | 0.19744  | YES | YES |       |  |  |  |  |  |
| 57 | a | 1408.85 | 0.07348  | YES | YES |       |  |  |  |  |  |
| 58 | a | 1414.41 | 38.92017 | YES | YES |       |  |  |  |  |  |
| 59 | a | 1442.19 | 0.03081  | YES | YES |       |  |  |  |  |  |
| 60 | a | 1452.91 | 0.00086  | YES | YES |       |  |  |  |  |  |
| 61 | a | 1452.99 | 0.00038  | YES | YES |       |  |  |  |  |  |
| 62 | a | 1492.00 | 13.61848 | YES | YES |       |  |  |  |  |  |
| 63 | a | 1492.26 | 13.58872 | YES | YES |       |  |  |  |  |  |
| 64 | a | 2952.64 | 33.37904 | YES | YES |       |  |  |  |  |  |
| 65 | a | 2952.84 | 33.32803 | YES | YES |       |  |  |  |  |  |
| 66 | a | 2952.87 | 70.15541 | YES | YES |       |  |  |  |  |  |
| 67 | a | 2952.97 | 47.07046 | YES | YES |       |  |  |  |  |  |
| 68 | a | 2954.27 | 26.44482 | YES | YES |       |  |  |  |  |  |
| 69 | a | 3026.79 | 28.06994 | YES | YES |       |  |  |  |  |  |
| 70 | a | 3027.10 | 5.14003  | YES | YES |       |  |  |  |  |  |
| 71 | a | 3027.25 | 4.32737  | YES | YES |       |  |  |  |  |  |
| 72 | a | 3028.46 | 0.15283  | YES | YES |       |  |  |  |  |  |
| 73 | a | 3028.70 | 0.03439  | YES | YES |       |  |  |  |  |  |
| 74 | a | 3058.52 | 2.22196  | YES | YES |       |  |  |  |  |  |
| 75 | a | 3058.85 | 2.69835  | YES | YES |       |  |  |  |  |  |
| 76 | a | 3059.08 | 4.32815  | YES | YES |       |  |  |  |  |  |
| 77 | a | 3059.51 | 22.71835 | YES | YES |       |  |  |  |  |  |
| 78 | a | 3059.85 | 22.98720 | YES | YES |       |  |  |  |  |  |
|    |   |         |          |     |     | \$end |  |  |  |  |  |

**[(Me<sub>3</sub>TACN)Al(AICp\*)<sub>3</sub>]<sup>+</sup>**

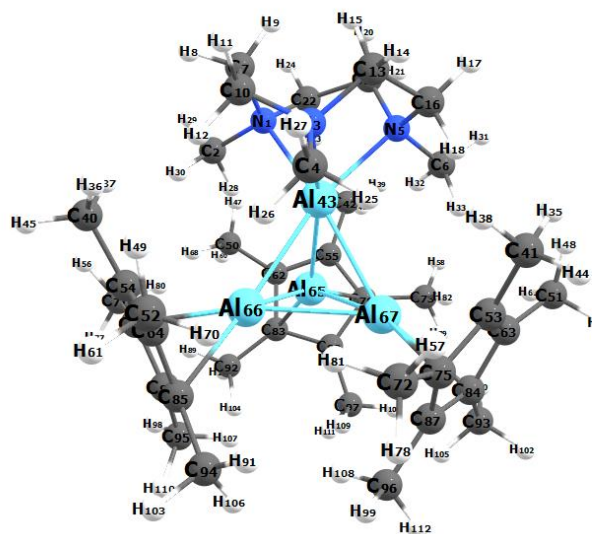

Method: (RI-)BP86(D3BJ)/def2-SVP

Symmetry: c1

Cartesian coordinates in Ångström:

|   |            |           |            |
|---|------------|-----------|------------|
| N | -2.0430972 | 2.3364798 | 15.5351394 |
| C | -2.5926762 | 1.0555079 | 16.0230238 |
| N | -0.6216260 | 3.0048000 | 13.1593342 |
| C | -0.2850350 | 2.5835513 | 11.7844442 |
| N | -2.6203038 | 4.7663921 | 14.1663356 |
| C | -3.8960404 | 5.4510038 | 13.8752319 |
| C | -0.5546339 | 2.3273240 | 15.5483141 |
| H | -0.1726674 | 1.5424744 | 16.2336485 |
| H | -0.1854892 | 3.2882714 | 15.9554769 |
| C | -0.0023481 | 2.0889117 | 14.1453364 |
| H | 1.1081336  | 2.1749992 | 14.1447957 |
| H | -0.2570057 | 1.0621115 | 13.8183606 |
| C | -0.2852092 | 4.4372373 | 13.3851005 |
| H | 0.4538179  | 4.7900305 | 12.6360123 |
| H | 0.2083815  | 4.5472230 | 14.3697930 |
| C | -1.5381680 | 5.3062254 | 13.3106145 |
| H | -1.2954677 | 6.3613188 | 13.5722316 |
| H | -1.9292202 | 5.3013333 | 12.2748585 |
| C | -2.3038428 | 4.8054083 | 15.6203885 |
| H | -1.2337906 | 5.0544626 | 15.7563307 |

|    |            |            |            |
|----|------------|------------|------------|
| H  | -2.8690116 | 5.6170964  | 16.1237314 |
| C  | -2.6345625 | 3.4703259  | 16.2828355 |
| H  | -3.7305252 | 3.3135357  | 16.2695896 |
| H  | -2.3095271 | 3.4740929  | 17.3481478 |
| H  | -0.8114963 | 3.2307227  | 11.0608886 |
| H  | -0.6536010 | 1.5540681  | 11.6253104 |
| H  | 0.8114115  | 2.6298118  | 11.6059796 |
| H  | -3.6895675 | 1.0629653  | 15.8901722 |
| H  | -2.3371672 | 0.8883593  | 17.0921474 |
| H  | -2.1984112 | 0.2269515  | 15.4083793 |
| H  | -3.8317885 | 6.5372116  | 14.1038658 |
| H  | -4.7060908 | 4.9895039  | 14.4672305 |
| H  | -4.1480675 | 5.3001097  | 12.8100188 |
| H  | -5.6973480 | 3.0853004  | 17.1642295 |
| H  | -2.4284745 | 6.1896681  | 10.3579033 |
| H  | 0.1871970  | -0.9825031 | 13.2385608 |
| H  | -0.9779495 | -1.0438995 | 14.5973452 |
| H  | -1.3574744 | 4.7888602  | 10.0449476 |
| H  | -5.7886302 | 4.4154450  | 15.9683943 |
| C  | -0.7200262 | -1.4928783 | 13.6167784 |
| C  | -2.2650021 | 5.3196527  | 9.6924236  |
| C  | -6.3234712 | 3.5289632  | 16.3656262 |
| Al | -2.8128971 | 2.6516347  | 13.4562842 |
| H  | -2.0158105 | 5.7320660  | 8.6910333  |
| H  | -0.4262829 | -2.5445635 | 13.8231330 |
| H  | -7.2398438 | 3.9145736  | 16.8620774 |
| H  | -5.5260543 | 0.9468015  | 17.3352388 |
| H  | -4.4240251 | 6.7177570  | 10.9682715 |
| H  | 0.3572734  | -0.5003181 | 11.1483028 |
| C  | -6.1290228 | 0.3284796  | 16.6420140 |
| C  | -5.2604979 | 6.1285722  | 10.5443274 |
| C  | -0.4589806 | -0.8343442 | 10.4785915 |
| C  | -3.4758331 | 4.4350614  | 9.6232783  |
| C  | -1.8468560 | -1.4340099 | 12.6267642 |
| C  | -6.6690164 | 2.5245776  | 15.3049251 |
| H  | -2.9774982 | -2.4818286 | 14.9340461 |
| H  | -1.4867112 | 3.0287949  | 8.2945030  |
| H  | -7.5592329 | 4.9551046  | 14.3050624 |
| H  | -5.7212401 | 6.7532298  | 9.7488899  |



H -6.9945861 -0.0542813 17.2247204  
H -0.0830174 -1.7291488 9.9370561  
C -6.5885368 1.1001419 15.4396065  
C -4.8087596 4.8063471 9.9962817  
C -1.7205536 -1.1492493 11.2280418  
Al -5.3239119 1.7139060 13.4684323  
Al -3.3605686 0.3854562 12.1343109  
Al -4.2581232 2.7792084 11.2036297  
H -5.5213932 -0.5565319 16.3623638  
H -6.0277111 6.0114656 11.3369713  
H -0.6138177 -0.0453933 9.7141466  
C -3.7773290 -2.1966172 14.2239431  
C -2.3496681 2.3623332 8.4853289  
C -7.5706048 4.1949950 13.5004203  
C -3.2118790 -1.8076337 12.8870969  
C -3.5250610 3.1270447 9.0254628  
C -7.2853223 2.8213371 14.0388626  
H -4.4622045 -3.0638861 14.1369869  
H -2.5966104 1.8638275 7.5265980  
H -8.5682361 4.2423795 13.0196282  
H -4.3576749 -1.3708246 14.6913919  
H -2.0077520 1.5681836 9.1852740  
H -6.8266052 4.5095597 12.7357825  
C -7.1612563 0.5103215 14.2613380  
C -5.6885023 3.7330101 9.6243329  
C -3.0045859 -1.3527897 10.6164101  
C -3.9251350 -1.7731604 11.6377369  
C -4.8989363 2.6993247 9.0115123  
C -7.6053066 1.5723015 13.3999697  
H -6.5862407 -1.5830326 14.4046596  
H -7.5575058 4.2368103 10.6175330  
H -2.7689572 -0.4850626 8.6355108  
C -7.4287669 -0.9518983 14.0629983  
C -7.1864325 3.7754840 9.6824346  
C -3.2798774 -1.3258234 9.1425401  
C -5.3650199 -2.1294835 11.4082928  
C -5.4429102 1.4210188 8.4430528  
C -8.3007581 1.3816742 12.0835204  
H -5.7880804 -2.6708830 12.2742724

H -4.6937228 0.9118573 7.8095840  
H -8.7654246 2.3218534 11.7342728  
H -8.3243907 -1.2661332 14.6415325  
H -7.5921202 4.3776458 8.8407525  
H -2.9198028 -2.2610687 8.6616936  
H -7.6211406 -1.1938535 13.0021933  
H -7.6287633 2.7657475 9.6076082  
H -4.3604462 -1.2405202 8.9283479  
H -5.9977214 -1.2293627 11.2427618  
H -5.7425559 0.7034076 9.2387091  
H -7.6021571 1.0445327 11.2860763  
H -5.4783828 -2.7807200 10.5187633  
H -9.1030160 0.6210737 12.1624863  
H -6.3370360 1.6113212 7.8163866

SCF energy GEOOPT = -2658.723053696 H

ZPE = 2496. kJ/mol

FREEH energy = 2654.20 kJ/mol

FREEH entropy = 1.32835 kJ/mol/K

\$vibrational spectrum

| #  | mode | symmetry | wave number | IR intensity | selection rules |
|----|------|----------|-------------|--------------|-----------------|
| #  |      |          | cm**(-1)    | km/mol       | IR RAMAN        |
| 1  |      |          | -0.00       | 0.00000      | - -             |
| 2  |      |          | -0.00       | 0.00000      | - -             |
| 3  |      |          | -0.00       | 0.00000      | - -             |
| 4  |      |          | -0.00       | 0.00000      | - -             |
| 5  |      |          | 0.00        | 0.00000      | - -             |
| 6  |      |          | 0.00        | 0.00000      | - -             |
| 7  | a    |          | 24.76       | 0.12432      | YES YES         |
| 8  | a    |          | 32.85       | 0.09116      | YES YES         |
| 9  | a    |          | 33.85       | 0.08330      | YES YES         |
| 10 | a    |          | 42.02       | 0.18628      | YES YES         |
| 11 | a    |          | 42.43       | 0.00801      | YES YES         |
| 12 | a    |          | 49.01       | 0.05052      | YES YES         |
| 13 | a    |          | 56.87       | 0.07412      | YES YES         |
| 14 | a    |          | 61.77       | 0.15007      | YES YES         |
| 15 | a    |          | 64.67       | 0.08015      | YES YES         |
| 16 | a    |          | 68.53       | 0.32839      | YES YES         |

|    |   |        |         |     |     |    |   |        |           |     |     |
|----|---|--------|---------|-----|-----|----|---|--------|-----------|-----|-----|
| 17 | a | 74.72  | 0.05154 | YES | YES | 56 | a | 220.21 | 1.26691   | YES | YES |
| 18 | a | 79.47  | 0.16462 | YES | YES | 57 | a | 238.73 | 9.11988   | YES | YES |
| 19 | a | 83.47  | 0.22820 | YES | YES | 58 | a | 239.04 | 1.03848   | YES | YES |
| 20 | a | 88.90  | 0.25696 | YES | YES | 59 | a | 241.47 | 6.24244   | YES | YES |
| 21 | a | 97.31  | 0.17263 | YES | YES | 60 | a | 245.04 | 2.81205   | YES | YES |
| 22 | a | 97.96  | 0.35905 | YES | YES | 61 | a | 247.13 | 0.13527   | YES | YES |
| 23 | a | 103.41 | 0.05569 | YES | YES | 62 | a | 259.82 | 7.86919   | YES | YES |
| 24 | a | 107.88 | 0.09489 | YES | YES | 63 | a | 264.44 | 3.17229   | YES | YES |
| 25 | a | 111.61 | 0.37688 | YES | YES | 64 | a | 265.45 | 3.97497   | YES | YES |
| 26 | a | 113.27 | 0.54841 | YES | YES | 65 | a | 267.63 | 2.57294   | YES | YES |
| 27 | a | 118.77 | 0.44714 | YES | YES | 66 | a | 271.06 | 1.01749   | YES | YES |
| 28 | a | 124.89 | 0.09047 | YES | YES | 67 | a | 272.86 | 1.13557   | YES | YES |
| 29 | a | 126.16 | 0.16406 | YES | YES | 68 | a | 274.68 | 0.49945   | YES | YES |
| 30 | a | 128.39 | 0.02887 | YES | YES | 69 | a | 278.35 | 0.76410   | YES | YES |
| 31 | a | 136.07 | 0.22153 | YES | YES | 70 | a | 278.95 | 0.78896   | YES | YES |
| 32 | a | 138.80 | 0.02866 | YES | YES | 71 | a | 280.53 | 1.26665   | YES | YES |
| 33 | a | 141.00 | 0.08679 | YES | YES | 72 | a | 282.45 | 1.24505   | YES | YES |
| 34 | a | 143.05 | 0.24258 | YES | YES | 73 | a | 285.03 | 9.27113   | YES | YES |
| 35 | a | 145.68 | 0.18980 | YES | YES | 74 | a | 286.54 | 4.59235   | YES | YES |
| 36 | a | 148.38 | 8.30259 | YES | YES | 75 | a | 289.13 | 6.74848   | YES | YES |
| 37 | a | 149.15 | 2.45696 | YES | YES | 76 | a | 291.44 | 17.29626  | YES | YES |
| 38 | a | 153.76 | 6.94866 | YES | YES | 77 | a | 292.36 | 10.14156  | YES | YES |
| 39 | a | 157.67 | 0.15373 | YES | YES | 78 | a | 319.48 | 138.03823 | YES | YES |
| 40 | a | 160.92 | 1.02831 | YES | YES | 79 | a | 321.41 | 8.10114   | YES | YES |
| 41 | a | 163.01 | 0.50941 | YES | YES | 80 | a | 323.76 | 12.96405  | YES | YES |
| 42 | a | 165.12 | 0.22380 | YES | YES | 81 | a | 336.61 | 48.38835  | YES | YES |
| 43 | a | 169.09 | 0.16534 | YES | YES | 82 | a | 337.37 | 51.86975  | YES | YES |
| 44 | a | 174.06 | 1.57132 | YES | YES | 83 | a | 338.85 | 11.05704  | YES | YES |
| 45 | a | 174.39 | 0.86165 | YES | YES | 84 | a | 357.78 | 22.40892  | YES | YES |
| 46 | a | 182.61 | 0.06430 | YES | YES | 85 | a | 361.06 | 31.98888  | YES | YES |
| 47 | a | 184.82 | 0.26838 | YES | YES | 86 | a | 361.35 | 39.89567  | YES | YES |
| 48 | a | 186.06 | 0.17230 | YES | YES | 87 | a | 383.27 | 101.37289 | YES | YES |
| 49 | a | 189.52 | 0.98572 | YES | YES | 88 | a | 385.46 | 185.59980 | YES | YES |
| 50 | a | 190.01 | 0.82754 | YES | YES | 89 | a | 385.71 | 159.62169 | YES | YES |
| 51 | a | 195.22 | 5.53318 | YES | YES | 90 | a | 389.02 | 103.46693 | YES | YES |
| 52 | a | 201.68 | 0.73173 | YES | YES | 91 | a | 389.51 | 86.60572  | YES | YES |
| 53 | a | 202.94 | 0.15457 | YES | YES | 92 | a | 417.47 | 10.41830  | YES | YES |
| 54 | a | 215.91 | 2.60578 | YES | YES | 93 | a | 437.12 | 0.49561   | YES | YES |
| 55 | a | 218.83 | 1.30965 | YES | YES | 94 | a | 438.33 | 0.54994   | YES | YES |

|     |   |        |          |     |     |     |   |         |          |     |     |
|-----|---|--------|----------|-----|-----|-----|---|---------|----------|-----|-----|
| 95  | a | 468.78 | 8.14126  | YES | YES | 134 | a | 933.24  | 0.43227  | YES | YES |
| 96  | a | 486.87 | 1.01076  | YES | YES | 135 | a | 934.64  | 0.47987  | YES | YES |
| 97  | a | 539.97 | 0.12275  | YES | YES | 136 | a | 970.01  | 10.02720 | YES | YES |
| 98  | a | 540.29 | 0.50088  | YES | YES | 137 | a | 970.40  | 9.83268  | YES | YES |
| 99  | a | 540.58 | 0.45980  | YES | YES | 138 | a | 978.28  | 12.21923 | YES | YES |
| 100 | a | 544.91 | 0.05708  | YES | YES | 139 | a | 983.35  | 2.19427  | YES | YES |
| 101 | a | 545.04 | 0.06020  | YES | YES | 140 | a | 984.16  | 1.63935  | YES | YES |
| 102 | a | 545.85 | 0.01343  | YES | YES | 141 | a | 984.46  | 1.52390  | YES | YES |
| 103 | a | 546.75 | 0.06220  | YES | YES | 142 | a | 989.78  | 2.56607  | YES | YES |
| 104 | a | 547.12 | 0.00311  | YES | YES | 143 | a | 991.31  | 2.85872  | YES | YES |
| 105 | a | 547.53 | 0.00827  | YES | YES | 144 | a | 991.59  | 1.33512  | YES | YES |
| 106 | a | 561.22 | 4.51171  | YES | YES | 145 | a | 992.90  | 1.22146  | YES | YES |
| 107 | a | 561.75 | 4.35039  | YES | YES | 146 | a | 993.87  | 0.73871  | YES | YES |
| 108 | a | 572.52 | 0.98563  | YES | YES | 147 | a | 994.84  | 0.57919  | YES | YES |
| 109 | a | 573.25 | 1.26809  | YES | YES | 148 | a | 999.62  | 0.33372  | YES | YES |
| 110 | a | 574.00 | 1.09051  | YES | YES | 149 | a | 1000.73 | 0.19297  | YES | YES |
| 111 | a | 580.56 | 1.75695  | YES | YES | 150 | a | 1001.14 | 0.84967  | YES | YES |
| 112 | a | 581.20 | 0.99457  | YES | YES | 151 | a | 1002.77 | 21.48370 | YES | YES |
| 113 | a | 582.25 | 1.49323  | YES | YES | 152 | a | 1004.20 | 21.07742 | YES | YES |
| 114 | a | 586.15 | 0.43116  | YES | YES | 153 | a | 1007.89 | 0.85504  | YES | YES |
| 115 | a | 593.64 | 14.44990 | YES | YES | 154 | a | 1009.03 | 0.71906  | YES | YES |
| 116 | a | 594.03 | 14.70580 | YES | YES | 155 | a | 1009.63 | 0.47147  | YES | YES |
| 117 | a | 597.29 | 4.10394  | YES | YES | 156 | a | 1011.75 | 0.08334  | YES | YES |
| 118 | a | 731.50 | 11.58304 | YES | YES | 157 | a | 1026.59 | 1.41216  | YES | YES |
| 119 | a | 732.65 | 11.70608 | YES | YES | 158 | a | 1044.45 | 2.24647  | YES | YES |
| 120 | a | 768.84 | 59.83178 | YES | YES | 159 | a | 1044.68 | 2.44275  | YES | YES |
| 121 | a | 797.62 | 1.16015  | YES | YES | 160 | a | 1045.60 | 1.55993  | YES | YES |
| 122 | a | 798.06 | 3.54983  | YES | YES | 161 | a | 1047.39 | 1.18534  | YES | YES |
| 123 | a | 799.44 | 3.71847  | YES | YES | 162 | a | 1047.68 | 0.68582  | YES | YES |
| 124 | a | 803.54 | 2.74355  | YES | YES | 163 | a | 1048.28 | 0.80678  | YES | YES |
| 125 | a | 804.09 | 2.98561  | YES | YES | 164 | a | 1053.73 | 13.23338 | YES | YES |
| 126 | a | 804.54 | 3.16562  | YES | YES | 165 | a | 1054.16 | 13.08255 | YES | YES |
| 127 | a | 845.15 | 0.48774  | YES | YES | 166 | a | 1070.96 | 0.36054  | YES | YES |
| 128 | a | 889.88 | 6.12099  | YES | YES | 167 | a | 1071.17 | 0.40058  | YES | YES |
| 129 | a | 890.84 | 6.01671  | YES | YES | 168 | a | 1071.84 | 0.29747  | YES | YES |
| 130 | a | 919.74 | 1.16611  | YES | YES | 169 | a | 1080.42 | 37.26636 | YES | YES |
| 131 | a | 920.63 | 0.92566  | YES | YES | 170 | a | 1101.20 | 2.45295  | YES | YES |
| 132 | a | 921.10 | 0.90513  | YES | YES | 171 | a | 1102.29 | 1.83897  | YES | YES |
| 133 | a | 932.06 | 0.29898  | YES | YES | 172 | a | 1104.74 | 6.24446  | YES | YES |

|     |   |         |          |     |     |     |   |         |          |     |     |
|-----|---|---------|----------|-----|-----|-----|---|---------|----------|-----|-----|
| 173 | a | 1137.13 | 7.73280  | YES | YES | 212 | a | 1384.29 | 2.65274  | YES | YES |
| 174 | a | 1137.92 | 7.16111  | YES | YES | 213 | a | 1385.17 | 3.33817  | YES | YES |
| 175 | a | 1161.39 | 0.00243  | YES | YES | 214 | a | 1385.51 | 2.29728  | YES | YES |
| 176 | a | 1162.55 | 0.16349  | YES | YES | 215 | a | 1386.22 | 0.49916  | YES | YES |
| 177 | a | 1163.12 | 0.16674  | YES | YES | 216 | a | 1386.95 | 0.74998  | YES | YES |
| 178 | a | 1166.20 | 0.02222  | YES | YES | 217 | a | 1388.24 | 8.52855  | YES | YES |
| 179 | a | 1167.01 | 0.07843  | YES | YES | 218 | a | 1389.34 | 6.81069  | YES | YES |
| 180 | a | 1167.35 | 0.08968  | YES | YES | 219 | a | 1393.32 | 2.56363  | YES | YES |
| 181 | a | 1199.78 | 2.16077  | YES | YES | 220 | a | 1394.61 | 20.73703 | YES | YES |
| 182 | a | 1200.33 | 2.09099  | YES | YES | 221 | a | 1394.63 | 18.74494 | YES | YES |
| 183 | a | 1215.52 | 0.69564  | YES | YES | 222 | a | 1395.53 | 5.57683  | YES | YES |
| 184 | a | 1239.14 | 0.52715  | YES | YES | 223 | a | 1398.44 | 3.98591  | YES | YES |
| 185 | a | 1239.92 | 0.51690  | YES | YES | 224 | a | 1399.18 | 4.07638  | YES | YES |
| 186 | a | 1267.64 | 1.49940  | YES | YES | 225 | a | 1401.17 | 4.01402  | YES | YES |
| 187 | a | 1268.50 | 22.40515 | YES | YES | 226 | a | 1402.53 | 8.15185  | YES | YES |
| 188 | a | 1277.21 | 10.06304 | YES | YES | 227 | a | 1403.33 | 19.36155 | YES | YES |
| 189 | a | 1277.53 | 10.09235 | YES | YES | 228 | a | 1403.66 | 30.15045 | YES | YES |
| 190 | a | 1316.72 | 2.85897  | YES | YES | 229 | a | 1404.72 | 10.58366 | YES | YES |
| 191 | a | 1329.06 | 0.20472  | YES | YES | 230 | a | 1405.30 | 6.31354  | YES | YES |
| 192 | a | 1329.83 | 0.15097  | YES | YES | 231 | a | 1405.58 | 9.91502  | YES | YES |
| 193 | a | 1337.16 | 0.44140  | YES | YES | 232 | a | 1407.28 | 0.69535  | YES | YES |
| 194 | a | 1337.59 | 0.27777  | YES | YES | 233 | a | 1407.85 | 1.77709  | YES | YES |
| 195 | a | 1338.05 | 0.33738  | YES | YES | 234 | a | 1409.25 | 6.70924  | YES | YES |
| 196 | a | 1340.68 | 0.42799  | YES | YES | 235 | a | 1410.62 | 10.44552 | YES | YES |
| 197 | a | 1341.38 | 0.75356  | YES | YES | 236 | a | 1411.25 | 9.68379  | YES | YES |
| 198 | a | 1341.81 | 1.00975  | YES | YES | 237 | a | 1411.89 | 7.61150  | YES | YES |
| 199 | a | 1342.82 | 2.30504  | YES | YES | 238 | a | 1414.03 | 25.26110 | YES | YES |
| 200 | a | 1343.57 | 5.30307  | YES | YES | 239 | a | 1414.51 | 12.32104 | YES | YES |
| 201 | a | 1344.55 | 3.09122  | YES | YES | 240 | a | 1414.81 | 11.95279 | YES | YES |
| 202 | a | 1345.16 | 2.46408  | YES | YES | 241 | a | 1415.30 | 30.26748 | YES | YES |
| 203 | a | 1346.06 | 1.78150  | YES | YES | 242 | a | 1416.39 | 14.72662 | YES | YES |
| 204 | a | 1346.46 | 4.14944  | YES | YES | 243 | a | 1417.30 | 2.77948  | YES | YES |
| 205 | a | 1349.50 | 0.95576  | YES | YES | 244 | a | 1417.79 | 4.26693  | YES | YES |
| 206 | a | 1350.01 | 0.30815  | YES | YES | 245 | a | 1418.17 | 7.72311  | YES | YES |
| 207 | a | 1351.41 | 0.32571  | YES | YES | 246 | a | 1420.47 | 18.95784 | YES | YES |
| 208 | a | 1356.72 | 15.05204 | YES | YES | 247 | a | 1421.59 | 5.41039  | YES | YES |
| 209 | a | 1364.18 | 5.26891  | YES | YES | 248 | a | 1422.73 | 11.45231 | YES | YES |
| 210 | a | 1365.83 | 4.71086  | YES | YES | 249 | a | 1423.68 | 1.43442  | YES | YES |
| 211 | a | 1382.28 | 0.35046  | YES | YES | 250 | a | 1424.23 | 13.98989 | YES | YES |

|     |   |         |          |     |     |     |   |         |          |     |     |
|-----|---|---------|----------|-----|-----|-----|---|---------|----------|-----|-----|
| 251 | a | 1424.86 | 19.66531 | YES | YES | 290 | a | 2961.44 | 25.77674 | YES | YES |
| 252 | a | 1425.28 | 5.55022  | YES | YES | 291 | a | 2961.54 | 34.17383 | YES | YES |
| 253 | a | 1426.42 | 6.57703  | YES | YES | 292 | a | 2986.78 | 6.09396  | YES | YES |
| 254 | a | 1426.64 | 5.96869  | YES | YES | 293 | a | 2987.12 | 5.72220  | YES | YES |
| 255 | a | 1439.77 | 7.53561  | YES | YES | 294 | a | 2989.83 | 68.84160 | YES | YES |
| 256 | a | 1439.86 | 8.02034  | YES | YES | 295 | a | 3016.43 | 8.51411  | YES | YES |
| 257 | a | 1440.87 | 0.73091  | YES | YES | 296 | a | 3016.59 | 8.22329  | YES | YES |
| 258 | a | 1441.63 | 4.75641  | YES | YES | 297 | a | 3016.69 | 13.34589 | YES | YES |
| 259 | a | 1443.93 | 4.98837  | YES | YES | 298 | a | 3017.00 | 13.24327 | YES | YES |
| 260 | a | 1444.33 | 4.59152  | YES | YES | 299 | a | 3017.35 | 12.02551 | YES | YES |
| 261 | a | 1448.86 | 19.14821 | YES | YES | 300 | a | 3017.53 | 4.47175  | YES | YES |
| 262 | a | 1451.58 | 0.35113  | YES | YES | 301 | a | 3022.34 | 2.02804  | YES | YES |
| 263 | a | 1452.60 | 0.77817  | YES | YES | 302 | a | 3022.41 | 11.78910 | YES | YES |
| 264 | a | 1452.79 | 0.73475  | YES | YES | 303 | a | 3022.56 | 9.97332  | YES | YES |
| 265 | a | 1486.95 | 2.02161  | YES | YES | 304 | a | 3025.72 | 12.00284 | YES | YES |
| 266 | a | 1488.20 | 7.16815  | YES | YES | 305 | a | 3026.07 | 6.81573  | YES | YES |
| 267 | a | 1488.29 | 7.37952  | YES | YES | 306 | a | 3026.28 | 7.06269  | YES | YES |
| 268 | a | 1496.72 | 5.87365  | YES | YES | 307 | a | 3034.80 | 8.06808  | YES | YES |
| 269 | a | 1497.43 | 5.71798  | YES | YES | 308 | a | 3035.18 | 7.30460  | YES | YES |
| 270 | a | 1497.71 | 8.12472  | YES | YES | 309 | a | 3036.43 | 3.59367  | YES | YES |
| 271 | a | 2940.51 | 23.53576 | YES | YES | 310 | a | 3041.30 | 3.82317  | YES | YES |
| 272 | a | 2941.04 | 33.18002 | YES | YES | 311 | a | 3041.55 | 4.04623  | YES | YES |
| 273 | a | 2942.04 | 34.21237 | YES | YES | 312 | a | 3041.66 | 4.10060  | YES | YES |
| 274 | a | 2942.70 | 49.06591 | YES | YES | 313 | a | 3049.55 | 0.17286  | YES | YES |
| 275 | a | 2943.22 | 23.28465 | YES | YES | 314 | a | 3050.39 | 0.93019  | YES | YES |
| 276 | a | 2943.77 | 8.98424  | YES | YES | 315 | a | 3051.80 | 11.56878 | YES | YES |
| 277 | a | 2947.70 | 3.69410  | YES | YES | 316 | a | 3052.06 | 7.67997  | YES | YES |
| 278 | a | 2947.87 | 20.78292 | YES | YES | 317 | a | 3052.36 | 5.45879  | YES | YES |
| 279 | a | 2948.07 | 16.32750 | YES | YES | 318 | a | 3052.83 | 16.55881 | YES | YES |
| 280 | a | 2949.62 | 48.63790 | YES | YES | 319 | a | 3053.02 | 12.93741 | YES | YES |
| 281 | a | 2949.78 | 47.56259 | YES | YES | 320 | a | 3053.51 | 11.10721 | YES | YES |
| 282 | a | 2950.36 | 57.31929 | YES | YES | 321 | a | 3054.55 | 9.84067  | YES | YES |
| 283 | a | 2951.88 | 21.10782 | YES | YES | 322 | a | 3059.86 | 6.72973  | YES | YES |
| 284 | a | 2951.92 | 28.92872 | YES | YES | 323 | a | 3060.02 | 7.31396  | YES | YES |
| 285 | a | 2952.40 | 24.66795 | YES | YES | 324 | a | 3060.93 | 7.14134  | YES | YES |
| 286 | a | 2953.92 | 19.99256 | YES | YES | 325 | a | 3064.48 | 6.88476  | YES | YES |
| 287 | a | 2954.03 | 28.37624 | YES | YES | 326 | a | 3064.77 | 6.73293  | YES | YES |
| 288 | a | 2954.29 | 52.82663 | YES | YES | 327 | a | 3065.31 | 6.15411  | YES | YES |
| 289 | a | 2961.23 | 27.30799 | YES | YES | 328 | a | 3075.76 | 6.01482  | YES | YES |

|     |   |         |         |     |     |
|-----|---|---------|---------|-----|-----|
| 329 | a | 3076.54 | 6.83172 | YES | YES |
| 330 | a | 3076.70 | 4.14728 | YES | YES |
| 331 | a | 3087.00 | 5.76237 | YES | YES |
| 332 | a | 3087.21 | 2.88616 | YES | YES |
| 333 | a | 3087.30 | 2.38460 | YES | YES |
| 334 | a | 3096.86 | 0.56396 | YES | YES |
| 335 | a | 3097.38 | 0.52847 | YES | YES |
| 336 | a | 3097.70 | 0.42321 | YES | YES |

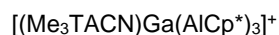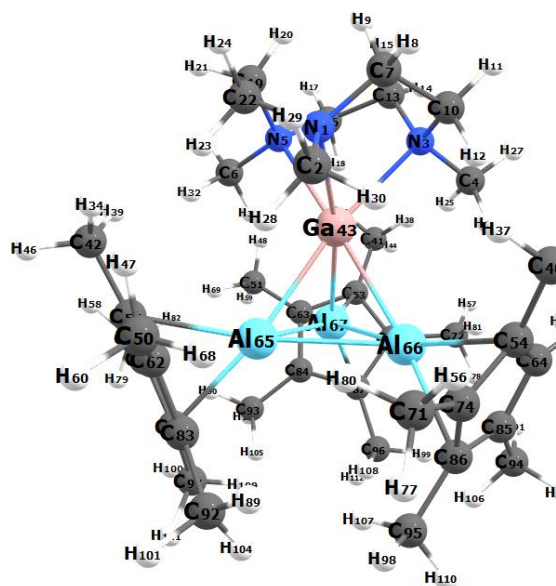

Method: (RI-)BP86(D3BJ)/def2-SVP

Symmetry: c1

Cartesian coordinates in Ångström:

N -1.9751311 2.3906802 15.6502623  
 C -2.5332876 1.1287076 16.1464637  
 N -0.4928810 3.0375719 13.2193151  
 C -0.1492538 2.6036198 11.8613955  
 N -2.5348033 4.8715451 14.2157350  
 C -3.7925823 5.5613973 13.9120488  
 C -0.4975961 2.3844818 15.6326623  
 H -0.0971589 1.6113448 16.3236674  
 H -0.1206584 3.3495917 16.0234474  
 C 0.0617599 2.1249959 14.2322463  
 H 1.1772242 2.1692862 14.2650780  
 H -0.2128284 1.0999204 13.9154600  
 C -0.1903015 4.4657925 13.4477559  
 H 0.5588717 4.8337045 12.7135072  
 H 0.2878886 4.5868416 14.4391305  
 C -1.4403841 5.3431545 13.3517880  
 H -1.1660126 6.4035003 13.5702077  
 H -1.8253993 5.3151531 12.3137593  
 C -2.2236513 4.8784175 15.6602893

H -1.1504635 5.1101017 15.8047552  
 H -2.7726102 5.6939754 16.1790286  
 C -2.5740103 3.5491890 16.3325896  
 H -3.6710437 3.4019205 16.2972272  
 H -2.2844178 3.5920479 17.4103529  
 H -0.6471198 3.2591631 11.1233389  
 H -0.5363824 1.5809193 11.6961726  
 H 0.9502949 2.6186841 11.6823067  
 H -3.6285836 1.1286677 15.9929288  
 H -2.3088908 0.9667012 17.2257150  
 H -2.1262068 0.2846872 15.5596753  
 H -3.7292330 6.6557095 14.1117945  
 H -4.6108906 5.1281763 14.5162958  
 H -4.0532551 5.3942646 12.8503936  
 H -5.6782579 3.0685298 17.0925397  
 H -2.4503333 6.1189487 10.3818322  
 H 0.1215511 -0.9453258 13.2280480  
 H -1.0663708 -1.0161588 14.5658004  
 H -1.4065339 4.7015041 10.0548961  
 H -5.7909449 4.3799647 15.8787882  
 C -0.7818687 -1.4693260 13.5951228  
 C -2.2988083 5.2572795 9.7036134  
 C -6.3201146 3.5028623 16.3020482  
 Ga -2.8686512 2.6130175 13.4111958  
 H -2.0388881 5.6772167 8.7083412  
 H -0.4773772 -2.5157137 13.8113816  
 H -7.2280041 3.8949257 16.8084922  
 H -5.5396121 0.9290840 17.2939585  
 H -4.4471579 6.6792142 10.9595338  
 H 0.3147446 -0.5004355 11.1309719  
 C -6.1289844 0.2978331 16.6014900  
 C -5.2944537 6.0926098 10.5553478  
 C -0.4979305 -0.8191593 10.4503847  
 C -3.5226944 4.3934377 9.6169836  
 C -1.8952493 -1.4327939 12.5897481  
 C -6.6853520 2.4876396 15.2591473  
 H -3.0328475 -2.6261036 14.8402055  
 H -1.6000806 3.0181727 8.1329174  
 H -7.7330423 4.8849459 14.2883669

H -5.7748225 6.7176422 9.7723695  
H -6.9876732 -0.1025391 17.1819348  
H -0.1227355 -1.7036366 9.8922383  
C -6.6045609 1.0617597 15.4008224  
C -4.8551040 4.7732954 9.9914737  
C -1.7614517 -1.1493080 11.1892094  
Al -5.3557911 1.6814904 13.4851302  
Al -3.3504470 0.3562541 12.0961094  
Al -4.2927838 2.8011153 11.1776212  
H -5.5020437 -0.5729230 16.3206001  
H -6.0405172 5.9719739 11.3671790  
H -0.6496082 -0.0133473 9.7033947  
C -3.8183018 -2.2130066 14.1782612  
C -2.4064690 2.3334162 8.4595467  
C -7.6037158 4.1534612 13.4672962  
C -3.2571711 -1.8253314 12.8399455  
C -3.5830391 3.0937972 9.0014539  
C -7.3197880 2.7781428 14.0003295  
H -4.6038014 -2.9874681 14.0775180  
H -2.6917508 1.7199000 7.5825592  
H -8.5329718 4.1687803 12.8646631  
H -4.2771472 -1.3484805 14.7075801  
H -1.9692844 1.6420681 9.2140753  
H -6.7841086 4.5284986 12.8147692  
C -7.1845510 0.4677322 14.2285951  
C -5.7412539 3.7081219 9.6125534  
C -3.0405759 -1.3619009 10.5712638  
C -3.9648603 -1.7873177 11.5883969  
C -4.9580807 2.6721496 8.9933938  
C -7.6346421 1.5268122 13.3650680  
H -6.6069638 -1.6224049 14.3861166  
H -7.6020766 4.2207438 10.6131459  
H -2.7920553 -0.4939851 8.5935253  
C -7.4485572 -0.9956104 14.0354653  
C -7.2384743 3.7592071 9.6757195  
C -3.3091102 -1.3329797 9.0963903  
C -5.3998267 -2.1566326 11.3467191  
C -5.5135030 1.4023309 8.4161237  
C -8.3414279 1.3271346 12.0555893

H -5.8327008 -2.6780936 12.2196819  
H -4.7642858 0.8844209 7.7901264  
H -8.7956073 2.2685209 11.6966056  
H -8.3468957 -1.3071732 14.6110432  
H -7.6416856 4.3670027 8.8370654  
H -2.9489864 -2.2693066 8.6179040  
H -7.6360323 -1.2432674 12.9750855  
H -7.6879108 2.7528757 9.5977221  
H -4.3884245 -1.2458475 8.8764664  
H -6.0366285 -1.2672210 11.1472878  
H -5.8341670 0.6859717 9.2037537  
H -7.6563421 0.9681733 11.2568688  
H -5.4953922 -2.8319606 10.4730840  
H -9.1541523 0.5797079 12.1520220  
H -6.3968019 1.6073875 7.7787870

SCF energy GEOOPT = -4341.229891963 H

ZPE = 2492. kJ/mol

FREEH energy = 2653.10 kJ/mol

FREEH entropy = 1.36149 kJ/mol/K

\$vibrational spectrum

| #  | mode | symmetry | wave number          | IR intensity | selection rules |
|----|------|----------|----------------------|--------------|-----------------|
| #  |      |          | cm <sup>**(-1)</sup> | km/mol       | IR RAMAN        |
| 1  |      |          | -0.00                | 0.00000      | - -             |
| 2  |      |          | 0.00                 | 0.00000      | - -             |
| 3  |      |          | 0.00                 | 0.00000      | - -             |
| 4  |      |          | 0.00                 | 0.00000      | - -             |
| 5  |      |          | 0.00                 | 0.00000      | - -             |
| 6  |      |          | 0.00                 | 0.00000      | - -             |
| 7  | a    |          | 17.67                | 0.13559      | YES YES         |
| 8  | a    |          | 32.32                | 0.12444      | YES YES         |
| 9  | a    |          | 33.20                | 0.08002      | YES YES         |
| 10 | a    |          | 37.57                | 0.01051      | YES YES         |
| 11 | a    |          | 41.31                | 0.01297      | YES YES         |
| 12 | a    |          | 46.95                | 0.01033      | YES YES         |
| 13 | a    |          | 51.22                | 0.39554      | YES YES         |
| 14 | a    |          | 56.62                | 0.20247      | YES YES         |
| 15 | a    |          | 60.18                | 0.32714      | YES YES         |



|    |   |        |          |     |     |    |   |        |           |     |     |
|----|---|--------|----------|-----|-----|----|---|--------|-----------|-----|-----|
| 16 | a | 66.08  | 0.17514  | YES | YES | 55 | a | 203.04 | 1.02550   | YES | YES |
| 17 | a | 70.78  | 0.13457  | YES | YES | 56 | a | 204.50 | 0.78581   | YES | YES |
| 18 | a | 72.48  | 0.09941  | YES | YES | 57 | a | 225.42 | 34.50723  | YES | YES |
| 19 | a | 77.06  | 0.35900  | YES | YES | 58 | a | 225.77 | 9.51783   | YES | YES |
| 20 | a | 84.56  | 0.83971  | YES | YES | 59 | a | 228.10 | 11.72433  | YES | YES |
| 21 | a | 89.61  | 0.02684  | YES | YES | 60 | a | 235.24 | 2.74116   | YES | YES |
| 22 | a | 94.21  | 0.04523  | YES | YES | 61 | a | 237.18 | 10.74522  | YES | YES |
| 23 | a | 95.70  | 0.56476  | YES | YES | 62 | a | 239.08 | 1.58680   | YES | YES |
| 24 | a | 97.72  | 0.08627  | YES | YES | 63 | a | 240.61 | 6.15795   | YES | YES |
| 25 | a | 101.14 | 0.22275  | YES | YES | 64 | a | 247.20 | 1.88845   | YES | YES |
| 26 | a | 106.30 | 0.02154  | YES | YES | 65 | a | 255.13 | 1.37380   | YES | YES |
| 27 | a | 109.57 | 0.73139  | YES | YES | 66 | a | 265.88 | 1.44491   | YES | YES |
| 28 | a | 117.10 | 0.04783  | YES | YES | 67 | a | 266.08 | 1.70641   | YES | YES |
| 29 | a | 119.43 | 0.23901  | YES | YES | 68 | a | 268.03 | 0.59209   | YES | YES |
| 30 | a | 123.18 | 2.98660  | YES | YES | 69 | a | 276.66 | 0.21919   | YES | YES |
| 31 | a | 127.77 | 0.16180  | YES | YES | 70 | a | 276.94 | 0.32743   | YES | YES |
| 32 | a | 130.38 | 0.52675  | YES | YES | 71 | a | 277.66 | 0.30372   | YES | YES |
| 33 | a | 133.12 | 1.83702  | YES | YES | 72 | a | 278.75 | 0.57901   | YES | YES |
| 34 | a | 138.58 | 1.35395  | YES | YES | 73 | a | 279.39 | 0.57100   | YES | YES |
| 35 | a | 140.57 | 0.24544  | YES | YES | 74 | a | 279.70 | 0.51031   | YES | YES |
| 36 | a | 144.15 | 0.28953  | YES | YES | 75 | a | 280.74 | 0.66536   | YES | YES |
| 37 | a | 148.33 | 0.75535  | YES | YES | 76 | a | 286.38 | 1.41694   | YES | YES |
| 38 | a | 150.17 | 1.34633  | YES | YES | 77 | a | 288.90 | 1.18956   | YES | YES |
| 39 | a | 154.04 | 0.04714  | YES | YES | 78 | a | 289.36 | 1.84664   | YES | YES |
| 40 | a | 156.70 | 0.16709  | YES | YES | 79 | a | 302.84 | 1.69202   | YES | YES |
| 41 | a | 157.60 | 14.91668 | YES | YES | 80 | a | 305.84 | 1.55273   | YES | YES |
| 42 | a | 159.33 | 23.79223 | YES | YES | 81 | a | 343.75 | 8.32177   | YES | YES |
| 43 | a | 163.95 | 1.57780  | YES | YES | 82 | a | 344.51 | 24.19593  | YES | YES |
| 44 | a | 165.73 | 0.77627  | YES | YES | 83 | a | 345.37 | 30.52406  | YES | YES |
| 45 | a | 166.87 | 0.14738  | YES | YES | 84 | a | 361.42 | 5.15222   | YES | YES |
| 46 | a | 172.93 | 1.80705  | YES | YES | 85 | a | 362.37 | 11.52534  | YES | YES |
| 47 | a | 174.64 | 1.46456  | YES | YES | 86 | a | 365.29 | 38.96523  | YES | YES |
| 48 | a | 176.57 | 3.06310  | YES | YES | 87 | a | 368.34 | 37.07902  | YES | YES |
| 49 | a | 179.45 | 0.62141  | YES | YES | 88 | a | 371.80 | 57.13129  | YES | YES |
| 50 | a | 179.79 | 0.24147  | YES | YES | 89 | a | 372.95 | 65.87298  | YES | YES |
| 51 | a | 181.85 | 0.05313  | YES | YES | 90 | a | 395.24 | 286.24027 | YES | YES |
| 52 | a | 189.36 | 0.79029  | YES | YES | 91 | a | 396.09 | 289.88602 | YES | YES |
| 53 | a | 190.88 | 0.72347  | YES | YES | 92 | a | 403.18 | 11.50384  | YES | YES |
| 54 | a | 201.66 | 2.17632  | YES | YES | 93 | a | 431.81 | 0.18243   | YES | YES |

|     |   |        |          |     |     |     |   |         |          |     |     |
|-----|---|--------|----------|-----|-----|-----|---|---------|----------|-----|-----|
| 94  | a | 432.10 | 0.32736  | YES | YES | 133 | a | 931.49  | 0.61866  | YES | YES |
| 95  | a | 464.10 | 30.57838 | YES | YES | 134 | a | 932.83  | 0.88425  | YES | YES |
| 96  | a | 475.63 | 34.05474 | YES | YES | 135 | a | 934.72  | 0.86901  | YES | YES |
| 97  | a | 541.88 | 0.16656  | YES | YES | 136 | a | 970.17  | 12.82650 | YES | YES |
| 98  | a | 542.37 | 0.45303  | YES | YES | 137 | a | 970.78  | 12.50309 | YES | YES |
| 99  | a | 542.62 | 0.36740  | YES | YES | 138 | a | 980.74  | 21.85366 | YES | YES |
| 100 | a | 545.20 | 0.02740  | YES | YES | 139 | a | 984.61  | 2.12337  | YES | YES |
| 101 | a | 545.58 | 0.03179  | YES | YES | 140 | a | 985.42  | 1.20350  | YES | YES |
| 102 | a | 546.00 | 0.06913  | YES | YES | 141 | a | 986.09  | 1.28848  | YES | YES |
| 103 | a | 547.27 | 0.00598  | YES | YES | 142 | a | 991.09  | 2.06360  | YES | YES |
| 104 | a | 547.45 | 0.00958  | YES | YES | 143 | a | 992.27  | 1.64859  | YES | YES |
| 105 | a | 548.01 | 0.02665  | YES | YES | 144 | a | 992.76  | 1.11806  | YES | YES |
| 106 | a | 554.12 | 5.32625  | YES | YES | 145 | a | 994.52  | 0.71280  | YES | YES |
| 107 | a | 554.99 | 5.31845  | YES | YES | 146 | a | 994.90  | 1.09369  | YES | YES |
| 108 | a | 575.48 | 0.70335  | YES | YES | 147 | a | 996.18  | 1.36394  | YES | YES |
| 109 | a | 576.81 | 1.73609  | YES | YES | 148 | a | 1000.91 | 0.37757  | YES | YES |
| 110 | a | 577.27 | 1.67127  | YES | YES | 149 | a | 1002.19 | 0.29618  | YES | YES |
| 111 | a | 578.54 | 1.11605  | YES | YES | 150 | a | 1002.47 | 0.40243  | YES | YES |
| 112 | a | 578.96 | 1.09782  | YES | YES | 151 | a | 1007.32 | 1.00193  | YES | YES |
| 113 | a | 579.83 | 1.63302  | YES | YES | 152 | a | 1009.10 | 1.11338  | YES | YES |
| 114 | a | 580.50 | 0.39411  | YES | YES | 153 | a | 1009.43 | 0.93777  | YES | YES |
| 115 | a | 593.97 | 12.72742 | YES | YES | 154 | a | 1015.66 | 22.71505 | YES | YES |
| 116 | a | 594.32 | 12.92941 | YES | YES | 155 | a | 1016.32 | 22.59863 | YES | YES |
| 117 | a | 597.24 | 6.40167  | YES | YES | 156 | a | 1023.00 | 0.22443  | YES | YES |
| 118 | a | 735.72 | 13.18999 | YES | YES | 157 | a | 1026.06 | 2.31318  | YES | YES |
| 119 | a | 736.88 | 13.25819 | YES | YES | 158 | a | 1045.31 | 1.78567  | YES | YES |
| 120 | a | 757.21 | 83.44637 | YES | YES | 159 | a | 1045.44 | 1.94783  | YES | YES |
| 121 | a | 797.80 | 1.22178  | YES | YES | 160 | a | 1046.11 | 0.62569  | YES | YES |
| 122 | a | 798.30 | 3.16277  | YES | YES | 161 | a | 1047.81 | 2.50353  | YES | YES |
| 123 | a | 798.92 | 3.07666  | YES | YES | 162 | a | 1048.68 | 1.50487  | YES | YES |
| 124 | a | 804.53 | 3.15693  | YES | YES | 163 | a | 1049.22 | 1.19435  | YES | YES |
| 125 | a | 805.70 | 3.33015  | YES | YES | 164 | a | 1063.18 | 12.03599 | YES | YES |
| 126 | a | 806.20 | 3.24488  | YES | YES | 165 | a | 1063.97 | 12.52074 | YES | YES |
| 127 | a | 847.72 | 1.32942  | YES | YES | 166 | a | 1070.93 | 0.25698  | YES | YES |
| 128 | a | 884.86 | 6.07999  | YES | YES | 167 | a | 1071.75 | 0.30712  | YES | YES |
| 129 | a | 885.38 | 5.95196  | YES | YES | 168 | a | 1072.32 | 0.29336  | YES | YES |
| 130 | a | 920.76 | 0.86115  | YES | YES | 169 | a | 1096.82 | 37.55542 | YES | YES |
| 131 | a | 922.37 | 0.64942  | YES | YES | 170 | a | 1103.84 | 1.73496  | YES | YES |
| 132 | a | 922.75 | 0.58407  | YES | YES | 171 | a | 1104.28 | 1.72938  | YES | YES |

|     |   |         |          |     |     |     |   |         |          |     |     |
|-----|---|---------|----------|-----|-----|-----|---|---------|----------|-----|-----|
| 172 | a | 1107.31 | 0.88232  | YES | YES | 211 | a | 1383.18 | 0.65492  | YES | YES |
| 173 | a | 1140.93 | 11.30628 | YES | YES | 212 | a | 1385.64 | 5.86505  | YES | YES |
| 174 | a | 1141.97 | 11.24821 | YES | YES | 213 | a | 1385.95 | 3.58878  | YES | YES |
| 175 | a | 1162.86 | 0.00537  | YES | YES | 214 | a | 1386.74 | 1.95221  | YES | YES |
| 176 | a | 1164.01 | 0.19963  | YES | YES | 215 | a | 1386.95 | 1.10705  | YES | YES |
| 177 | a | 1164.41 | 0.21184  | YES | YES | 216 | a | 1387.84 | 1.93034  | YES | YES |
| 178 | a | 1166.29 | 0.01986  | YES | YES | 217 | a | 1390.06 | 3.80335  | YES | YES |
| 179 | a | 1167.37 | 0.13148  | YES | YES | 218 | a | 1390.91 | 4.74726  | YES | YES |
| 180 | a | 1167.79 | 0.15986  | YES | YES | 219 | a | 1393.22 | 1.23894  | YES | YES |
| 181 | a | 1215.14 | 3.44089  | YES | YES | 220 | a | 1394.60 | 13.62225 | YES | YES |
| 182 | a | 1215.43 | 3.55543  | YES | YES | 221 | a | 1394.78 | 9.56343  | YES | YES |
| 183 | a | 1230.00 | 1.40643  | YES | YES | 222 | a | 1394.93 | 20.52656 | YES | YES |
| 184 | a | 1242.37 | 2.05569  | YES | YES | 223 | a | 1397.99 | 5.32652  | YES | YES |
| 185 | a | 1243.04 | 1.92324  | YES | YES | 224 | a | 1398.36 | 5.42398  | YES | YES |
| 186 | a | 1268.30 | 5.57784  | YES | YES | 225 | a | 1400.70 | 3.74977  | YES | YES |
| 187 | a | 1281.79 | 11.83219 | YES | YES | 226 | a | 1402.61 | 12.96692 | YES | YES |
| 188 | a | 1289.46 | 10.11453 | YES | YES | 227 | a | 1403.40 | 5.45174  | YES | YES |
| 189 | a | 1289.93 | 10.00618 | YES | YES | 228 | a | 1403.49 | 5.98364  | YES | YES |
| 190 | a | 1321.84 | 3.46193  | YES | YES | 229 | a | 1404.97 | 15.56442 | YES | YES |
| 191 | a | 1335.40 | 1.05062  | YES | YES | 230 | a | 1405.79 | 12.83604 | YES | YES |
| 192 | a | 1335.49 | 1.12949  | YES | YES | 231 | a | 1406.51 | 6.33884  | YES | YES |
| 193 | a | 1337.47 | 0.61118  | YES | YES | 232 | a | 1407.16 | 14.30256 | YES | YES |
| 194 | a | 1338.06 | 0.76668  | YES | YES | 233 | a | 1407.90 | 6.88766  | YES | YES |
| 195 | a | 1338.79 | 0.88263  | YES | YES | 234 | a | 1409.07 | 1.65975  | YES | YES |
| 196 | a | 1340.11 | 0.55474  | YES | YES | 235 | a | 1412.43 | 2.21682  | YES | YES |
| 197 | a | 1341.04 | 0.39994  | YES | YES | 236 | a | 1412.45 | 3.73332  | YES | YES |
| 198 | a | 1341.23 | 1.37206  | YES | YES | 237 | a | 1413.43 | 10.66892 | YES | YES |
| 199 | a | 1343.14 | 1.33396  | YES | YES | 238 | a | 1414.25 | 19.80039 | YES | YES |
| 200 | a | 1344.52 | 2.63895  | YES | YES | 239 | a | 1414.56 | 20.28767 | YES | YES |
| 201 | a | 1344.83 | 2.43990  | YES | YES | 240 | a | 1414.91 | 36.36880 | YES | YES |
| 202 | a | 1345.97 | 3.12229  | YES | YES | 241 | a | 1415.56 | 6.50827  | YES | YES |
| 203 | a | 1346.75 | 1.57817  | YES | YES | 242 | a | 1416.00 | 4.25663  | YES | YES |
| 204 | a | 1347.78 | 5.68362  | YES | YES | 243 | a | 1418.40 | 0.25236  | YES | YES |
| 205 | a | 1350.44 | 1.05513  | YES | YES | 244 | a | 1419.21 | 1.73589  | YES | YES |
| 206 | a | 1351.06 | 0.37067  | YES | YES | 245 | a | 1419.69 | 26.69188 | YES | YES |
| 207 | a | 1352.83 | 0.44359  | YES | YES | 246 | a | 1420.48 | 5.99993  | YES | YES |
| 208 | a | 1358.16 | 19.42754 | YES | YES | 247 | a | 1420.88 | 0.52899  | YES | YES |
| 209 | a | 1366.13 | 6.20726  | YES | YES | 248 | a | 1421.45 | 3.57808  | YES | YES |
| 210 | a | 1367.73 | 6.55147  | YES | YES | 249 | a | 1421.97 | 7.95735  | YES | YES |

|     |   |         |          |     |     |     |   |         |           |     |     |
|-----|---|---------|----------|-----|-----|-----|---|---------|-----------|-----|-----|
| 250 | a | 1425.30 | 16.40472 | YES | YES | 289 | a | 2963.15 | 23.87668  | YES | YES |
| 251 | a | 1425.63 | 14.66891 | YES | YES | 290 | a | 2963.25 | 27.42614  | YES | YES |
| 252 | a | 1428.76 | 5.24435  | YES | YES | 291 | a | 2963.47 | 31.36061  | YES | YES |
| 253 | a | 1429.65 | 11.93001 | YES | YES | 292 | a | 2968.67 | 16.99142  | YES | YES |
| 254 | a | 1430.19 | 11.81995 | YES | YES | 293 | a | 2969.05 | 15.83349  | YES | YES |
| 255 | a | 1440.15 | 3.92386  | YES | YES | 294 | a | 2971.22 | 100.81077 | YES | YES |
| 256 | a | 1441.09 | 11.13971 | YES | YES | 295 | a | 3020.53 | 5.04136   | YES | YES |
| 257 | a | 1441.42 | 11.08516 | YES | YES | 296 | a | 3021.15 | 5.17523   | YES | YES |
| 258 | a | 1443.75 | 0.45026  | YES | YES | 297 | a | 3021.90 | 5.90533   | YES | YES |
| 259 | a | 1444.35 | 0.60032  | YES | YES | 298 | a | 3022.68 | 15.21175  | YES | YES |
| 260 | a | 1444.55 | 0.74168  | YES | YES | 299 | a | 3022.74 | 13.01448  | YES | YES |
| 261 | a | 1448.31 | 8.18201  | YES | YES | 300 | a | 3022.90 | 11.71527  | YES | YES |
| 262 | a | 1451.30 | 1.02510  | YES | YES | 301 | a | 3025.42 | 4.66825   | YES | YES |
| 263 | a | 1452.14 | 0.92107  | YES | YES | 302 | a | 3025.54 | 4.58083   | YES | YES |
| 264 | a | 1452.47 | 0.91084  | YES | YES | 303 | a | 3026.00 | 4.53023   | YES | YES |
| 265 | a | 1487.46 | 3.83963  | YES | YES | 304 | a | 3026.28 | 4.42057   | YES | YES |
| 266 | a | 1488.52 | 7.03247  | YES | YES | 305 | a | 3026.33 | 8.97868   | YES | YES |
| 267 | a | 1488.81 | 7.24299  | YES | YES | 306 | a | 3027.74 | 14.14796  | YES | YES |
| 268 | a | 1496.05 | 6.09276  | YES | YES | 307 | a | 3027.80 | 0.71649   | YES | YES |
| 269 | a | 1496.42 | 5.75487  | YES | YES | 308 | a | 3028.36 | 7.54462   | YES | YES |
| 270 | a | 1496.84 | 11.02257 | YES | YES | 309 | a | 3028.49 | 7.52970   | YES | YES |
| 271 | a | 2914.66 | 36.32457 | YES | YES | 310 | a | 3041.73 | 1.27704   | YES | YES |
| 272 | a | 2914.83 | 34.98198 | YES | YES | 311 | a | 3041.98 | 1.21225   | YES | YES |
| 273 | a | 2914.98 | 60.84230 | YES | YES | 312 | a | 3044.13 | 1.18097   | YES | YES |
| 274 | a | 2927.61 | 60.79058 | YES | YES | 313 | a | 3044.36 | 3.30462   | YES | YES |
| 275 | a | 2927.67 | 60.04741 | YES | YES | 314 | a | 3044.47 | 3.49515   | YES | YES |
| 276 | a | 2928.15 | 32.03919 | YES | YES | 315 | a | 3044.64 | 2.87117   | YES | YES |
| 277 | a | 2938.74 | 33.47125 | YES | YES | 316 | a | 3045.26 | 2.61385   | YES | YES |
| 278 | a | 2940.13 | 24.56805 | YES | YES | 317 | a | 3045.34 | 3.25754   | YES | YES |
| 279 | a | 2940.31 | 49.84960 | YES | YES | 318 | a | 3047.07 | 34.09524  | YES | YES |
| 280 | a | 2948.80 | 63.26989 | YES | YES | 319 | a | 3057.96 | 8.90857   | YES | YES |
| 281 | a | 2949.98 | 5.61350  | YES | YES | 320 | a | 3058.51 | 10.08599  | YES | YES |
| 282 | a | 2950.14 | 5.15842  | YES | YES | 321 | a | 3058.77 | 15.62838  | YES | YES |
| 283 | a | 2955.09 | 18.11094 | YES | YES | 322 | a | 3059.20 | 5.00945   | YES | YES |
| 284 | a | 2955.33 | 20.19403 | YES | YES | 323 | a | 3059.42 | 9.73561   | YES | YES |
| 285 | a | 2955.80 | 20.87676 | YES | YES | 324 | a | 3059.90 | 8.78078   | YES | YES |
| 286 | a | 2957.04 | 24.15267 | YES | YES | 325 | a | 3063.21 | 5.66879   | YES | YES |
| 287 | a | 2957.13 | 25.76938 | YES | YES | 326 | a | 3063.39 | 5.68859   | YES | YES |
| 288 | a | 2957.36 | 45.55214 | YES | YES | 327 | a | 3063.51 | 5.91610   | YES | YES |

|     |   |         |         |     |     |
|-----|---|---------|---------|-----|-----|
| 328 | a | 3078.53 | 6.98227 | YES | YES |
| 329 | a | 3078.72 | 7.17895 | YES | YES |
| 330 | a | 3078.83 | 2.71829 | YES | YES |
| 331 | a | 3082.54 | 0.90619 | YES | YES |
| 332 | a | 3083.02 | 1.13471 | YES | YES |
| 333 | a | 3083.73 | 1.05147 | YES | YES |
| 334 | a | 3088.70 | 4.53464 | YES | YES |
| 335 | a | 3088.96 | 2.69971 | YES | YES |
| 336 | a | 3089.69 | 3.04091 | YES | YES |

\$end

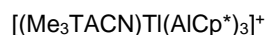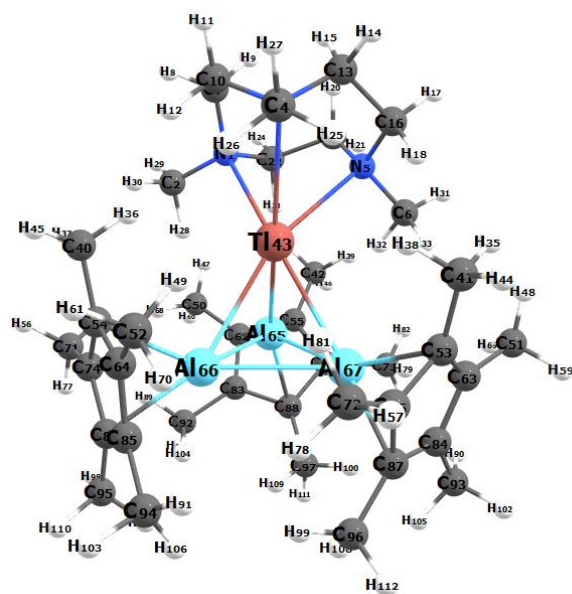

Method: (RI)-BP86(D3BJ)/def2-SVP

Symmetry: c1

Cartesian coordinates in Ångström:

N -1.7616164 2.3349738 15.7603429  
 C -2.1943790 1.0078813 16.1918982  
 N 0.0449262 3.3577620 13.5877543  
 C 0.7091420 3.0765772 12.3167057  
 N -2.4464156 4.8881717 14.2803994  
 C -3.7020654 5.4795318 13.8260328  
 C -0.3217471 2.5647414 15.9536870  
 H 0.1012921 1.8347932 16.6790252  
 H -0.1633233 3.5549171 16.4247176  
 C 0.5008649 2.4681639 14.6613089  
 H 1.5770126 2.6425425 14.9185536  
 H 0.4387351 1.4303603 14.2709800  
 C 0.0484986 4.7896074 13.9259124  
 H 0.8493701 5.3256310 13.3687156  
 H 0.3137185 4.9151644 14.9939179  
 C -1.2795399 5.5021811 13.6364564  
 H -1.1636718 6.5790669 13.9218595  
 H -1.4710487 5.4865403 12.5434329  
 C -2.3707172 4.7870947 15.7471881  
 H -1.3792390 5.1400955 16.0931984

H -3.1011094 5.4779787 16.2245870  
 C -2.6437728 3.3801215 16.2894074  
 H -3.6790752 3.0870523 16.0152622  
 H -2.6081103 3.4246386 17.4085299  
 H 0.2731747 3.7039245 11.5143534  
 H 0.5502747 2.0166713 12.0322328  
 H 1.8093047 3.2685603 12.3519198  
 H -3.2284792 0.8215480 15.8343510  
 H -2.1739591 0.8893539 17.3027698  
 H -1.5440969 0.2337745 15.7441121  
 H -3.8144701 6.5466278 14.1376163  
 H -4.5568267 4.8970281 14.2221329  
 H -3.7673340 5.4226788 12.7230381  
 H -5.6826730 3.2286686 17.1153447  
 H -2.4252266 5.8307661 10.4293774  
 H -0.7238617 -0.0879664 13.2484967  
 H -1.2262136 -1.4490559 14.2966857  
 H -1.6029945 4.2434043 10.3063375  
 H -5.8826358 4.5298288 15.9047611  
 C -0.9971411 -1.1664634 13.2522156  
 C -2.3192608 4.9257734 9.8009632  
 C -6.3613750 3.6294692 16.3385180  
 Ti -2.5409201 2.4046172 13.0862974  
 H -1.8487789 5.2412347 8.8463192  
 H -0.0927759 -1.7305517 12.9430529  
 H -7.2798043 3.9725241 16.8607307  
 H -5.3670531 1.0663049 17.2619888  
 H -4.3736188 6.6264207 10.8405171  
 H -0.6458400 0.3020528 10.5866421  
 C -6.0763689 0.4476124 16.6785198  
 C -5.2766343 6.0977929 10.4808204  
 C -0.9820606 -0.6664962 10.1577499  
 C -3.6400447 4.2570407 9.5604704  
 C -2.1514282 -1.4519443 12.3390811  
 C -6.6915617 2.5964658 15.2997562  
 H -3.0594622 -3.1459594 14.5334809  
 H -2.2648174 2.5337435 7.4572533  
 H -8.5990338 4.3071581 13.1034082  
 H -5.7631974 6.7580174 9.7320752

H -6.9080597 0.1732950 17.3621053  
H -0.1134088 -1.3573561 10.1919387  
C -6.5825678 1.1692691 15.4638047  
C -4.9437282 4.7643224 9.8787590  
C -2.1447315 -1.2310015 10.9177195  
Al -5.2811722 1.7535267 13.6179577  
Al -3.8277099 0.0530917 11.8444485  
Al -4.5995914 2.7394934 11.0269111  
H -5.5555817 -0.4929826 16.4088019  
H -5.9783726 6.0106562 11.3355768  
H -1.2258540 -0.4938886 9.0936067  
C -3.8018509 -2.4509126 14.0909488  
C -2.6753488 2.1310029 8.4072938  
C -7.5373788 4.2022289 13.4062849  
C -3.4058554 -2.0501699 12.6990766  
C -3.8011828 2.9795365 8.9157276  
C -7.2652731 2.8554960 14.0090994  
H -4.7794361 -2.9673153 14.1011801  
H -3.0074810 1.0946490 8.2110522  
H -6.9160398 4.3705567 12.4987329  
H -3.8801948 -1.5737991 14.7691328  
H -1.8401710 2.0806274 9.1349451  
H -7.3130282 5.0198704 14.1166854  
C -7.0897235 0.5480979 14.2734195  
C -5.9141008 3.7946490 9.4458745  
C -3.4026869 -1.6811697 10.3955970  
C -4.1898682 -2.1816241 11.4988286  
C -5.2069888 2.6909703 8.8425677  
C -7.4989707 1.5902029 13.3645402  
H -6.5269184 -1.5170234 14.6163609  
H -7.7590649 4.4943958 10.3692334  
H -3.2615913 -1.0275956 8.3277409  
C -7.2523134 -0.9210632 14.0319790  
C -7.3999876 4.0041499 9.4435126  
C -3.8038671 -1.7628906 8.9526723  
C -5.5240838 -2.8561091 11.3522916  
C -5.8361766 1.4833091 8.2126783  
C -8.1111183 1.3788532 12.0108164  
H -5.9922885 -3.0598549 12.3325742

H -5.1693062 0.6026962 8.2702900  
H -8.0384770 2.2909247 11.3919557  
H -8.2695588 -1.2595645 14.3230698  
H -7.6947058 4.6605901 8.5965690  
H -3.5786306 -2.7691311 8.5388615  
H -7.1169772 -1.1746177 12.9632496  
H -7.9537622 3.0544016 9.3210535  
H -4.8894091 -1.5933187 8.8136199  
H -6.2398125 -2.2524812 10.7578100  
H -6.7895542 1.2113530 8.7070091  
H -7.6098479 0.5589977 11.4564379  
H -5.4139564 -3.8306574 10.8312816  
H -9.1867417 1.1134051 12.0894528  
H -6.0593478 1.6599242 7.1392001

SCF energy GEOOPT = -2589.014461531 H

ZPE = 2484. kJ/mol

FREEH energy = 2649.11 kJ/mol

FREEH entropy = 1.44928 kJ/mol/K

\$vibrational spectrum

| #  | mode | symmetry | wave number | IR intensity | selection rules |
|----|------|----------|-------------|--------------|-----------------|
| #  |      |          | cm**(-1)    | km/mol       | IR RAMAN        |
| 1  |      |          | -0.00       | 0.00000      | - -             |
| 2  |      |          | -0.00       | 0.00000      | - -             |
| 3  |      |          | -0.00       | 0.00000      | - -             |
| 4  |      |          | 0.00        | 0.00000      | - -             |
| 5  |      |          | 0.00        | 0.00000      | - -             |
| 6  |      |          | 0.00        | 0.00000      | - -             |
| 7  | a    |          | 3.45        | 0.04445      | YES YES         |
| 8  | a    |          | 17.63       | 0.28221      | YES YES         |
| 9  | a    |          | 23.04       | 0.02492      | YES YES         |
| 10 | a    |          | 25.00       | 0.04578      | YES YES         |
| 11 | a    |          | 33.46       | 0.01127      | YES YES         |
| 12 | a    |          | 34.54       | 0.03475      | YES YES         |
| 13 | a    |          | 41.01       | 0.15767      | YES YES         |
| 14 | a    |          | 42.17       | 0.13848      | YES YES         |
| 15 | a    |          | 45.12       | 0.13693      | YES YES         |
| 16 | a    |          | 48.02       | 0.13782      | YES YES         |

|    |   |        |          |     |     |    |   |        |           |     |     |
|----|---|--------|----------|-----|-----|----|---|--------|-----------|-----|-----|
| 17 | a | 55.96  | 0.06783  | YES | YES | 56 | a | 190.77 | 0.35382   | YES | YES |
| 18 | a | 58.05  | 0.13856  | YES | YES | 57 | a | 203.79 | 5.16838   | YES | YES |
| 19 | a | 64.32  | 0.13585  | YES | YES | 58 | a | 215.39 | 5.42647   | YES | YES |
| 20 | a | 68.70  | 0.14103  | YES | YES | 59 | a | 216.83 | 1.06051   | YES | YES |
| 21 | a | 76.64  | 0.18702  | YES | YES | 60 | a | 222.69 | 5.03529   | YES | YES |
| 22 | a | 76.70  | 0.07238  | YES | YES | 61 | a | 223.79 | 9.99445   | YES | YES |
| 23 | a | 77.74  | 0.19798  | YES | YES | 62 | a | 226.51 | 5.15974   | YES | YES |
| 24 | a | 80.95  | 0.91480  | YES | YES | 63 | a | 243.71 | 0.67308   | YES | YES |
| 25 | a | 86.33  | 1.67258  | YES | YES | 64 | a | 244.99 | 0.11854   | YES | YES |
| 26 | a | 88.89  | 0.26990  | YES | YES | 65 | a | 246.10 | 0.25596   | YES | YES |
| 27 | a | 91.00  | 0.24483  | YES | YES | 66 | a | 253.81 | 0.13349   | YES | YES |
| 28 | a | 93.37  | 1.00418  | YES | YES | 67 | a | 263.74 | 1.19052   | YES | YES |
| 29 | a | 96.34  | 0.42910  | YES | YES | 68 | a | 264.89 | 0.42476   | YES | YES |
| 30 | a | 98.68  | 1.64040  | YES | YES | 69 | a | 268.22 | 0.05231   | YES | YES |
| 31 | a | 102.74 | 0.34568  | YES | YES | 70 | a | 269.25 | 0.16128   | YES | YES |
| 32 | a | 104.41 | 17.72402 | YES | YES | 71 | a | 273.17 | 2.00930   | YES | YES |
| 33 | a | 113.48 | 0.72266  | YES | YES | 72 | a | 274.52 | 2.23117   | YES | YES |
| 34 | a | 115.12 | 0.98122  | YES | YES | 73 | a | 278.70 | 0.04815   | YES | YES |
| 35 | a | 120.08 | 0.62930  | YES | YES | 74 | a | 279.77 | 0.48045   | YES | YES |
| 36 | a | 124.78 | 0.08467  | YES | YES | 75 | a | 280.91 | 1.12894   | YES | YES |
| 37 | a | 134.88 | 0.58870  | YES | YES | 76 | a | 283.59 | 2.20684   | YES | YES |
| 38 | a | 135.13 | 0.47890  | YES | YES | 77 | a | 285.12 | 0.16351   | YES | YES |
| 39 | a | 136.00 | 1.01833  | YES | YES | 78 | a | 289.35 | 2.37181   | YES | YES |
| 40 | a | 139.62 | 0.53150  | YES | YES | 79 | a | 290.19 | 0.40359   | YES | YES |
| 41 | a | 143.55 | 0.20624  | YES | YES | 80 | a | 292.40 | 2.49203   | YES | YES |
| 42 | a | 149.05 | 0.27599  | YES | YES | 81 | a | 347.01 | 2.13388   | YES | YES |
| 43 | a | 151.33 | 0.49251  | YES | YES | 82 | a | 348.33 | 2.81038   | YES | YES |
| 44 | a | 161.44 | 0.12901  | YES | YES | 83 | a | 353.63 | 24.38326  | YES | YES |
| 45 | a | 161.51 | 0.33789  | YES | YES | 84 | a | 355.34 | 79.74801  | YES | YES |
| 46 | a | 164.06 | 0.06994  | YES | YES | 85 | a | 357.69 | 39.30598  | YES | YES |
| 47 | a | 169.43 | 1.38337  | YES | YES | 86 | a | 361.72 | 14.33605  | YES | YES |
| 48 | a | 172.34 | 2.00967  | YES | YES | 87 | a | 369.07 | 16.74973  | YES | YES |
| 49 | a | 173.67 | 1.00789  | YES | YES | 88 | a | 374.64 | 44.42440  | YES | YES |
| 50 | a | 176.33 | 0.28750  | YES | YES | 89 | a | 383.03 | 15.20994  | YES | YES |
| 51 | a | 178.84 | 0.09595  | YES | YES | 90 | a | 392.70 | 8.27592   | YES | YES |
| 52 | a | 179.71 | 0.45784  | YES | YES | 91 | a | 402.94 | 276.94118 | YES | YES |
| 53 | a | 183.14 | 0.51534  | YES | YES | 92 | a | 412.25 | 254.79709 | YES | YES |
| 54 | a | 185.71 | 0.76385  | YES | YES | 93 | a | 429.41 | 0.04455   | YES | YES |
| 55 | a | 187.25 | 0.73758  | YES | YES | 94 | a | 430.68 | 0.06066   | YES | YES |



|     |   |        |          |     |     |     |   |         |          |     |     |
|-----|---|--------|----------|-----|-----|-----|---|---------|----------|-----|-----|
| 95  | a | 462.93 | 96.59989 | YES | YES | 134 | a | 932.60  | 1.19976  | YES | YES |
| 96  | a | 471.31 | 1.45591  | YES | YES | 135 | a | 937.08  | 0.20494  | YES | YES |
| 97  | a | 542.25 | 0.17769  | YES | YES | 136 | a | 971.08  | 11.31898 | YES | YES |
| 98  | a | 542.74 | 0.07317  | YES | YES | 137 | a | 971.78  | 10.00290 | YES | YES |
| 99  | a | 543.57 | 0.03376  | YES | YES | 138 | a | 981.71  | 28.16817 | YES | YES |
| 100 | a | 544.55 | 0.05592  | YES | YES | 139 | a | 985.83  | 4.98044  | YES | YES |
| 101 | a | 544.94 | 0.09654  | YES | YES | 140 | a | 986.89  | 4.23531  | YES | YES |
| 102 | a | 546.07 | 0.13046  | YES | YES | 141 | a | 988.38  | 1.48376  | YES | YES |
| 103 | a | 546.65 | 5.59226  | YES | YES | 142 | a | 991.10  | 4.38902  | YES | YES |
| 104 | a | 547.37 | 0.73801  | YES | YES | 143 | a | 992.31  | 0.77026  | YES | YES |
| 105 | a | 547.99 | 5.21885  | YES | YES | 144 | a | 992.82  | 2.68875  | YES | YES |
| 106 | a | 548.05 | 0.35958  | YES | YES | 145 | a | 995.70  | 1.38080  | YES | YES |
| 107 | a | 549.08 | 0.08416  | YES | YES | 146 | a | 996.93  | 0.29858  | YES | YES |
| 108 | a | 571.69 | 0.28678  | YES | YES | 147 | a | 997.34  | 1.54880  | YES | YES |
| 109 | a | 574.81 | 0.27401  | YES | YES | 148 | a | 997.40  | 1.25890  | YES | YES |
| 110 | a | 575.92 | 1.99243  | YES | YES | 149 | a | 998.61  | 0.48997  | YES | YES |
| 111 | a | 577.80 | 1.85049  | YES | YES | 150 | a | 998.80  | 0.10242  | YES | YES |
| 112 | a | 580.84 | 1.46012  | YES | YES | 151 | a | 1002.45 | 0.33382  | YES | YES |
| 113 | a | 582.47 | 0.25074  | YES | YES | 152 | a | 1004.49 | 0.38609  | YES | YES |
| 114 | a | 587.00 | 1.22140  | YES | YES | 153 | a | 1006.34 | 0.04617  | YES | YES |
| 115 | a | 592.86 | 9.36075  | YES | YES | 154 | a | 1020.50 | 27.54852 | YES | YES |
| 116 | a | 593.51 | 7.44498  | YES | YES | 155 | a | 1022.09 | 22.79020 | YES | YES |
| 117 | a | 594.82 | 6.26642  | YES | YES | 156 | a | 1024.00 | 10.39752 | YES | YES |
| 118 | a | 737.64 | 15.31450 | YES | YES | 157 | a | 1031.31 | 0.34733  | YES | YES |
| 119 | a | 740.88 | 11.38746 | YES | YES | 158 | a | 1045.98 | 1.91925  | YES | YES |
| 120 | a | 745.81 | 83.17190 | YES | YES | 159 | a | 1047.05 | 1.08846  | YES | YES |
| 121 | a | 796.61 | 2.11474  | YES | YES | 160 | a | 1048.13 | 0.95382  | YES | YES |
| 122 | a | 798.02 | 1.81246  | YES | YES | 161 | a | 1048.86 | 0.43837  | YES | YES |
| 123 | a | 800.98 | 2.97044  | YES | YES | 162 | a | 1050.10 | 2.71574  | YES | YES |
| 124 | a | 803.24 | 2.51206  | YES | YES | 163 | a | 1051.25 | 1.12559  | YES | YES |
| 125 | a | 805.10 | 4.27999  | YES | YES | 164 | a | 1068.83 | 12.04409 | YES | YES |
| 126 | a | 806.82 | 3.32867  | YES | YES | 165 | a | 1070.80 | 1.77315  | YES | YES |
| 127 | a | 846.74 | 2.28828  | YES | YES | 166 | a | 1073.10 | 10.70664 | YES | YES |
| 128 | a | 875.56 | 5.31803  | YES | YES | 167 | a | 1074.48 | 0.98382  | YES | YES |
| 129 | a | 876.09 | 4.35480  | YES | YES | 168 | a | 1076.08 | 0.60895  | YES | YES |
| 130 | a | 918.39 | 0.23880  | YES | YES | 169 | a | 1099.43 | 18.38446 | YES | YES |
| 131 | a | 919.70 | 1.32815  | YES | YES | 170 | a | 1104.81 | 2.11346  | YES | YES |
| 132 | a | 926.89 | 0.58093  | YES | YES | 171 | a | 1106.82 | 1.24874  | YES | YES |
| 133 | a | 928.10 | 1.40106  | YES | YES | 172 | a | 1118.63 | 8.72062  | YES | YES |

|     |   |         |          |     |     |     |   |         |          |     |     |
|-----|---|---------|----------|-----|-----|-----|---|---------|----------|-----|-----|
| 173 | a | 1142.73 | 18.57852 | YES | YES | 212 | a | 1384.10 | 0.86565  | YES | YES |
| 174 | a | 1144.85 | 19.94728 | YES | YES | 213 | a | 1386.58 | 3.55648  | YES | YES |
| 175 | a | 1163.43 | 0.13204  | YES | YES | 214 | a | 1388.42 | 0.44279  | YES | YES |
| 176 | a | 1164.69 | 0.09761  | YES | YES | 215 | a | 1389.13 | 7.17588  | YES | YES |
| 177 | a | 1165.18 | 0.45560  | YES | YES | 216 | a | 1390.14 | 6.22233  | YES | YES |
| 178 | a | 1166.44 | 0.20667  | YES | YES | 217 | a | 1390.69 | 7.95291  | YES | YES |
| 179 | a | 1166.93 | 0.24792  | YES | YES | 218 | a | 1392.12 | 0.96328  | YES | YES |
| 180 | a | 1169.67 | 0.11512  | YES | YES | 219 | a | 1393.36 | 0.67943  | YES | YES |
| 181 | a | 1220.25 | 4.20069  | YES | YES | 220 | a | 1395.68 | 5.32309  | YES | YES |
| 182 | a | 1223.48 | 3.66772  | YES | YES | 221 | a | 1396.16 | 3.20400  | YES | YES |
| 183 | a | 1237.92 | 1.51042  | YES | YES | 222 | a | 1396.61 | 2.01579  | YES | YES |
| 184 | a | 1244.54 | 5.17738  | YES | YES | 223 | a | 1397.53 | 2.71913  | YES | YES |
| 185 | a | 1246.81 | 7.30458  | YES | YES | 224 | a | 1398.64 | 0.60791  | YES | YES |
| 186 | a | 1267.84 | 3.07143  | YES | YES | 225 | a | 1399.57 | 7.37717  | YES | YES |
| 187 | a | 1291.57 | 6.31423  | YES | YES | 226 | a | 1400.54 | 12.03459 | YES | YES |
| 188 | a | 1298.63 | 8.43320  | YES | YES | 227 | a | 1401.55 | 5.73255  | YES | YES |
| 189 | a | 1299.88 | 9.73426  | YES | YES | 228 | a | 1401.96 | 5.20215  | YES | YES |
| 190 | a | 1323.61 | 1.82276  | YES | YES | 229 | a | 1402.29 | 9.40433  | YES | YES |
| 191 | a | 1336.31 | 2.23480  | YES | YES | 230 | a | 1403.43 | 16.35528 | YES | YES |
| 192 | a | 1337.01 | 2.00942  | YES | YES | 231 | a | 1404.99 | 1.57390  | YES | YES |
| 193 | a | 1338.05 | 0.24643  | YES | YES | 232 | a | 1405.51 | 4.42018  | YES | YES |
| 194 | a | 1339.63 | 3.71511  | YES | YES | 233 | a | 1406.97 | 16.63594 | YES | YES |
| 195 | a | 1339.74 | 1.72704  | YES | YES | 234 | a | 1407.69 | 12.84531 | YES | YES |
| 196 | a | 1340.59 | 3.78261  | YES | YES | 235 | a | 1408.77 | 16.22846 | YES | YES |
| 197 | a | 1340.75 | 2.55404  | YES | YES | 236 | a | 1409.35 | 11.88682 | YES | YES |
| 198 | a | 1341.17 | 4.57094  | YES | YES | 237 | a | 1409.81 | 2.70015  | YES | YES |
| 199 | a | 1342.25 | 7.26799  | YES | YES | 238 | a | 1411.33 | 3.20358  | YES | YES |
| 200 | a | 1343.73 | 1.58810  | YES | YES | 239 | a | 1412.56 | 1.85302  | YES | YES |
| 201 | a | 1345.44 | 1.29370  | YES | YES | 240 | a | 1413.78 | 10.07292 | YES | YES |
| 202 | a | 1345.89 | 4.09731  | YES | YES | 241 | a | 1414.50 | 6.62341  | YES | YES |
| 203 | a | 1346.85 | 5.22701  | YES | YES | 242 | a | 1415.04 | 38.30647 | YES | YES |
| 204 | a | 1348.35 | 1.52485  | YES | YES | 243 | a | 1415.42 | 15.68628 | YES | YES |
| 205 | a | 1349.26 | 1.73934  | YES | YES | 244 | a | 1415.62 | 11.99068 | YES | YES |
| 206 | a | 1351.38 | 2.09864  | YES | YES | 245 | a | 1416.61 | 15.37382 | YES | YES |
| 207 | a | 1351.59 | 0.25317  | YES | YES | 246 | a | 1417.09 | 21.69526 | YES | YES |
| 208 | a | 1356.02 | 20.15680 | YES | YES | 247 | a | 1417.67 | 43.54826 | YES | YES |
| 209 | a | 1363.19 | 7.01947  | YES | YES | 248 | a | 1419.67 | 20.35736 | YES | YES |
| 210 | a | 1365.74 | 5.17403  | YES | YES | 249 | a | 1421.41 | 8.35332  | YES | YES |
| 211 | a | 1381.80 | 0.37636  | YES | YES | 250 | a | 1423.35 | 2.82534  | YES | YES |

|     |   |         |           |     |     |     |   |         |          |     |     |
|-----|---|---------|-----------|-----|-----|-----|---|---------|----------|-----|-----|
| 251 | a | 1425.13 | 5.94974   | YES | YES | 290 | a | 2961.21 | 29.53041 | YES | YES |
| 252 | a | 1430.56 | 2.21941   | YES | YES | 291 | a | 2961.42 | 14.71764 | YES | YES |
| 253 | a | 1431.52 | 10.27954  | YES | YES | 292 | a | 2962.00 | 26.01984 | YES | YES |
| 254 | a | 1432.36 | 12.43463  | YES | YES | 293 | a | 2965.04 | 10.67418 | YES | YES |
| 255 | a | 1434.88 | 7.57300   | YES | YES | 294 | a | 2965.11 | 28.35657 | YES | YES |
| 256 | a | 1435.25 | 9.58093   | YES | YES | 295 | a | 2991.16 | 1.28927  | YES | YES |
| 257 | a | 1441.68 | 2.63414   | YES | YES | 296 | a | 2992.22 | 3.88812  | YES | YES |
| 258 | a | 1445.45 | 1.78710   | YES | YES | 297 | a | 3001.22 | 8.82570  | YES | YES |
| 259 | a | 1446.23 | 0.31229   | YES | YES | 298 | a | 3003.99 | 0.48486  | YES | YES |
| 260 | a | 1447.04 | 3.09458   | YES | YES | 299 | a | 3007.95 | 15.12625 | YES | YES |
| 261 | a | 1448.40 | 1.66709   | YES | YES | 300 | a | 3010.23 | 16.13936 | YES | YES |
| 262 | a | 1453.34 | 1.15700   | YES | YES | 301 | a | 3016.08 | 4.29755  | YES | YES |
| 263 | a | 1454.23 | 4.46090   | YES | YES | 302 | a | 3018.70 | 9.05910  | YES | YES |
| 264 | a | 1455.53 | 1.43711   | YES | YES | 303 | a | 3019.58 | 7.21312  | YES | YES |
| 265 | a | 1482.53 | 3.72831   | YES | YES | 304 | a | 3023.27 | 8.40613  | YES | YES |
| 266 | a | 1483.08 | 8.40007   | YES | YES | 305 | a | 3024.51 | 5.65009  | YES | YES |
| 267 | a | 1487.30 | 11.46586  | YES | YES | 306 | a | 3024.62 | 6.84931  | YES | YES |
| 268 | a | 1494.90 | 6.85008   | YES | YES | 307 | a | 3026.07 | 4.97317  | YES | YES |
| 269 | a | 1499.81 | 10.56491  | YES | YES | 308 | a | 3026.12 | 7.34702  | YES | YES |
| 270 | a | 1500.70 | 10.59699  | YES | YES | 309 | a | 3026.19 | 11.69620 | YES | YES |
| 271 | a | 2870.49 | 61.67150  | YES | YES | 310 | a | 3028.44 | 7.72800  | YES | YES |
| 272 | a | 2876.92 | 56.58459  | YES | YES | 311 | a | 3029.23 | 8.15700  | YES | YES |
| 273 | a | 2877.25 | 102.19000 | YES | YES | 312 | a | 3030.51 | 5.24172  | YES | YES |
| 274 | a | 2894.42 | 85.32984  | YES | YES | 313 | a | 3030.70 | 7.29832  | YES | YES |
| 275 | a | 2895.94 | 70.72734  | YES | YES | 314 | a | 3033.61 | 39.50419 | YES | YES |
| 276 | a | 2898.19 | 89.93174  | YES | YES | 315 | a | 3033.87 | 4.41951  | YES | YES |
| 277 | a | 2935.97 | 24.75825  | YES | YES | 316 | a | 3034.16 | 5.62792  | YES | YES |
| 278 | a | 2937.80 | 24.30090  | YES | YES | 317 | a | 3040.04 | 3.22603  | YES | YES |
| 279 | a | 2948.76 | 3.08792   | YES | YES | 318 | a | 3043.17 | 3.50820  | YES | YES |
| 280 | a | 2948.95 | 44.81608  | YES | YES | 319 | a | 3053.27 | 8.27673  | YES | YES |
| 281 | a | 2950.32 | 23.23151  | YES | YES | 320 | a | 3056.66 | 8.26556  | YES | YES |
| 282 | a | 2951.92 | 37.53182  | YES | YES | 321 | a | 3058.43 | 9.15868  | YES | YES |
| 283 | a | 2953.46 | 56.77708  | YES | YES | 322 | a | 3063.57 | 6.83558  | YES | YES |
| 284 | a | 2957.73 | 19.84618  | YES | YES | 323 | a | 3065.19 | 8.03857  | YES | YES |
| 285 | a | 2958.14 | 99.06489  | YES | YES | 324 | a | 3066.32 | 4.71236  | YES | YES |
| 286 | a | 2958.84 | 40.42248  | YES | YES | 325 | a | 3067.00 | 5.31895  | YES | YES |
| 287 | a | 2959.25 | 18.51270  | YES | YES | 326 | a | 3068.74 | 5.66031  | YES | YES |
| 288 | a | 2959.29 | 16.29294  | YES | YES | 327 | a | 3069.42 | 2.33490  | YES | YES |
| 289 | a | 2960.69 | 28.99199  | YES | YES | 328 | a | 3069.50 | 6.87718  | YES | YES |

|     |   |         |          |     |     |
|-----|---|---------|----------|-----|-----|
| 329 | a | 3071.29 | 6.28658  | YES | YES |
| 330 | a | 3072.57 | 5.62512  | YES | YES |
| 331 | a | 3074.37 | 5.69896  | YES | YES |
| 332 | a | 3074.65 | 3.22480  | YES | YES |
| 333 | a | 3076.58 | 4.18869  | YES | YES |
| 334 | a | 3077.15 | 10.77451 | YES | YES |
| 335 | a | 3081.24 | 1.57747  | YES | YES |
| 336 | a | 3088.26 | 0.93035  | YES | YES |

\$end

**[(Me<sub>3</sub>TACN)Al(GaCp\*)(AlCp\*)<sub>2</sub>]<sup>+</sup>**

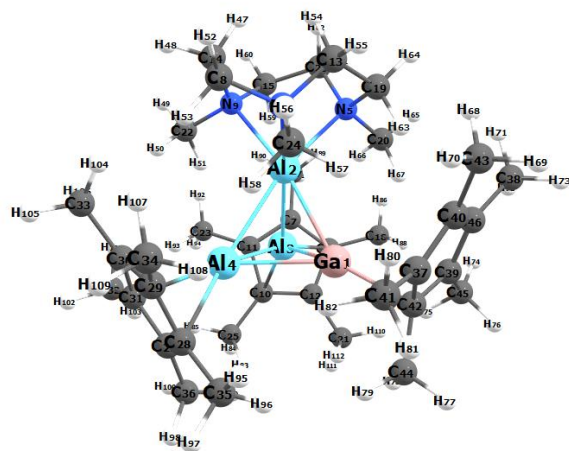

Method: (RI-)BP86(D3BJ)/def2-SVP

Symmetry: c1

Cartesian coordinates in Ångström:

Ga 5.1317366 12.3515620 6.1876601  
 Al 2.9229371 12.3896471 4.8984543  
 Al 3.1710179 10.9146025 7.1561028  
 Al 3.1657783 13.6672464 7.2815169  
 N 3.1455287 11.0934422 3.1523661  
 N 2.9620686 13.9173099 3.3289643  
 C 2.1470935 8.7884391 7.1435270  
 C 1.6004782 14.4980232 3.3862090  
 N 0.8226870 12.3036741 4.2577421  
 C 2.8017417 9.8179954 9.1215894  
 C 1.6731728 9.5433579 8.2720644  
 C 3.9704399 9.2438715 8.5127079  
 C 3.2883227 13.2906252 2.0153613  
 C 0.5374611 13.4040199 3.2908187  
 C 0.7196715 10.9487998 3.6589430  
 C 3.5668562 8.6091379 7.2891842  
 C 1.2868241 8.1806458 6.0742705  
 C 4.4715850 7.8310805 6.3764112  
 C 3.9495015 11.9343503 2.2291640  
 C 3.9196832 9.8971929 3.5533517  
 C 5.3596890 9.2985420 0.9797871  
 C -0.0416319 12.4086213 5.4538779

C 0.2496069 9.9135379 8.5727116  
 C 3.9899853 14.9176473 3.6925116  
 C 2.7593923 10.4567806 10.4760436  
 C 1.8079711 10.7206952 2.6115698  
 C 3.2305014 14.5993096 9.3687046  
 C 3.9622680 15.4784757 8.4995889  
 C 3.0472314 16.0176331 7.5337855  
 C 1.7511299 15.4550349 7.7902555  
 C 1.8614753 14.5725246 8.9247084  
 C 0.7211496 13.8400045 9.5696115  
 C 0.4758170 15.8289564 7.0932769  
 C 3.3644546 17.0779978 6.5206044  
 C 5.4159402 15.8110790 8.6556942  
 C 3.8369261 13.8801633 10.5365594  
 C 7.2006614 13.5928992 4.9132798  
 C 7.3958023 10.5411885 2.7144598  
 C 7.3767896 11.2649840 5.2128024  
 C 7.1892483 12.9707450 3.6493423  
 C 7.2133240 15.0632621 5.2143661  
 C 7.2748104 12.5418908 5.9348154  
 C 7.1929553 13.6473859 2.3063212  
 C 7.8931440 12.7648573 7.3020179  
 C 7.6697840 9.9469397 5.8663619  
 C 7.2923505 11.5374814 3.8344193  
 H 0.5002325 12.9874619 2.2661858  
 H -0.4653976 13.8389617 3.4791241  
 H -1.1074340 12.2321300 5.1918592  
 H 0.0741095 13.4117603 5.9007370  
 H 0.2966459 11.6734581 6.2086015  
 H 1.4441696 15.2637353 2.5934489  
 H 1.5207516 15.0116076 4.3664407  
 H 2.3640231 13.1936533 1.4140878  
 H 3.9672197 13.9453188 1.4321775  
 H 3.9902047 15.7654733 2.9741715  
 H 4.9793070 14.4248768 3.7106888  
 H 3.7881340 15.2867827 4.7124928  
 H 0.8520110 10.2307638 4.4916674  
 H -0.2885528 10.7727756 3.2213641  
 H 1.7966219 9.6582528 2.2924694

H 1.6030654 11.3127560 1.6990081  
H 4.9350875 12.0733303 2.7215393  
H 4.1181799 11.4217428 1.2562246  
H 4.1476253 9.2598709 2.6724335  
H 3.3407205 9.3214492 4.2957414  
H 4.8602643 10.2257120 4.0368030  
H 6.4679222 13.1996879 1.5911071  
H 8.1858846 13.5619122 1.8131401  
H 6.9666936 14.7297181 2.3777359  
H 6.6392381 10.7075752 1.9171108  
H 7.2763548 9.4993059 3.0717534  
H 8.3848977 10.5956670 2.2086993  
H 7.4082275 9.0899152 5.2136554  
H 7.1188617 9.8238488 6.8201392  
H 8.7505570 9.8433058 6.1102944  
H 9.0012049 12.8298497 7.2334837  
H 7.6550205 11.9429089 8.0074687  
H 7.5370756 13.7059783 7.7671666  
H 7.0783981 15.6756651 4.3010002  
H 8.1730666 15.3829909 5.6758926  
H 6.4115835 15.3493716 5.9287586  
H 3.6995530 10.9900503 10.7088568  
H 2.6108215 9.6883697 11.2649079  
H 1.9253921 11.1784714 10.5677518  
H 3.9288600 7.4423331 5.4939875  
H 4.9002452 6.9514703 6.9005292  
H 5.3244474 8.4374857 6.0121048  
H 1.7820269 8.1693824 5.0821380  
H 0.3213194 8.7134402 5.9681772  
H 1.0394359 7.1242178 6.3134330  
H -0.3938853 9.8508919 7.6732649  
H 0.1674039 10.9437783 8.9730263  
H -0.1927914 9.2340066 9.3320656  
H 5.8167681 16.3438760 7.7730808  
H 6.0312844 14.9008757 8.8064952  
H 5.5813701 16.4652931 9.5380280  
H 4.3194976 14.5985001 11.2307506  
H 4.6211045 13.1602972 10.2161893  
H 3.0800651 13.3192683 11.1133274

H 0.0288046 13.4039075 8.8209733  
H 0.1213019 14.5153989 10.2155657  
H 1.0806926 13.0109130 10.2075638  
H 0.6118437 15.9609829 5.9999191  
H 0.0760839 16.7917502 7.4780641  
H -0.3179604 15.0726122 7.2497514  
H 2.6646013 17.0616257 5.6621628  
H 4.3948350 16.9835406 6.1241124  
H 3.2872409 18.0898099 6.9737621  
H 6.0600395 8.6755624 8.4928650  
H 5.3822892 8.9305025 10.1256117  
H 5.7641126 10.3346623 9.0870166

SCF energy GEOOPT = -4341.237202990 H

ZPE = 2493. kJ/mol

FREEH energy = 2652.12 kJ/mol

FREEH entropy = 1.35856 kJ/mol/K

Vibrational spectrum

| #  | mode | symmetry | wave number           | IR intensity | selection rules |
|----|------|----------|-----------------------|--------------|-----------------|
| #  |      |          | cm <sup>**</sup> (-1) | km/mol       | IR RAMAN        |
| 1  |      |          | -0.00                 | 0.00000      | - -             |
| 2  |      |          | -0.00                 | 0.00000      | - -             |
| 3  |      |          | -0.00                 | 0.00000      | - -             |
| 4  |      |          | -0.00                 | 0.00000      | - -             |
| 5  |      |          | 0.00                  | 0.00000      | - -             |
| 6  |      |          | 0.00                  | 0.00000      | - -             |
| 7  | a    |          | 7.24                  | 0.13655      | YES YES         |
| 8  | a    |          | 28.06                 | 0.21852      | YES YES         |
| 9  | a    |          | 33.97                 | 0.09189      | YES YES         |
| 10 | a    |          | 40.77                 | 0.47444      | YES YES         |
| 11 | a    |          | 44.45                 | 0.26075      | YES YES         |
| 12 | a    |          | 48.76                 | 0.17223      | YES YES         |
| 13 | a    |          | 50.74                 | 0.10975      | YES YES         |
| 14 | a    |          | 58.30                 | 0.09478      | YES YES         |
| 15 | a    |          | 63.25                 | 0.24740      | YES YES         |
| 16 | a    |          | 64.19                 | 0.77339      | YES YES         |
| 17 | a    |          | 68.25                 | 0.10764      | YES YES         |
| 18 | a    |          | 71.20                 | 0.24615      | YES YES         |

|    |   |        |         |     |     |    |   |        |           |     |     |
|----|---|--------|---------|-----|-----|----|---|--------|-----------|-----|-----|
| 19 | a | 71.79  | 0.67632 | YES | YES | 58 | a | 237.32 | 1.45331   | YES | YES |
| 20 | a | 75.47  | 0.42944 | YES | YES | 59 | a | 238.61 | 1.44871   | YES | YES |
| 21 | a | 79.69  | 0.24513 | YES | YES | 60 | a | 244.61 | 2.63384   | YES | YES |
| 22 | a | 91.03  | 0.12206 | YES | YES | 61 | a | 255.13 | 19.46505  | YES | YES |
| 23 | a | 95.84  | 1.46214 | YES | YES | 62 | a | 258.47 | 2.00083   | YES | YES |
| 24 | a | 100.73 | 0.25353 | YES | YES | 63 | a | 260.17 | 21.69594  | YES | YES |
| 25 | a | 102.61 | 0.12238 | YES | YES | 64 | a | 261.19 | 2.12218   | YES | YES |
| 26 | a | 109.26 | 0.06482 | YES | YES | 65 | a | 263.68 | 1.40554   | YES | YES |
| 27 | a | 112.35 | 0.19861 | YES | YES | 66 | a | 267.01 | 20.73673  | YES | YES |
| 28 | a | 115.05 | 0.32915 | YES | YES | 67 | a | 271.79 | 0.93245   | YES | YES |
| 29 | a | 118.38 | 0.19978 | YES | YES | 68 | a | 272.59 | 3.64733   | YES | YES |
| 30 | a | 119.38 | 0.16894 | YES | YES | 69 | a | 273.36 | 1.13704   | YES | YES |
| 31 | a | 123.60 | 0.47919 | YES | YES | 70 | a | 275.38 | 0.35036   | YES | YES |
| 32 | a | 126.76 | 0.10172 | YES | YES | 71 | a | 278.74 | 0.31793   | YES | YES |
| 33 | a | 128.56 | 0.05205 | YES | YES | 72 | a | 279.96 | 0.69017   | YES | YES |
| 34 | a | 134.44 | 0.26777 | YES | YES | 73 | a | 280.17 | 1.42966   | YES | YES |
| 35 | a | 138.09 | 0.17656 | YES | YES | 74 | a | 288.47 | 3.71631   | YES | YES |
| 36 | a | 139.53 | 0.31019 | YES | YES | 75 | a | 289.49 | 1.01230   | YES | YES |
| 37 | a | 143.10 | 0.34691 | YES | YES | 76 | a | 289.75 | 0.93093   | YES | YES |
| 38 | a | 148.40 | 0.48143 | YES | YES | 77 | a | 294.53 | 9.29651   | YES | YES |
| 39 | a | 149.61 | 0.15723 | YES | YES | 78 | a | 306.46 | 7.06836   | YES | YES |
| 40 | a | 160.16 | 1.15173 | YES | YES | 79 | a | 328.44 | 5.74169   | YES | YES |
| 41 | a | 162.75 | 0.34884 | YES | YES | 80 | a | 331.33 | 7.70375   | YES | YES |
| 42 | a | 164.70 | 0.36927 | YES | YES | 81 | a | 343.73 | 59.85051  | YES | YES |
| 43 | a | 167.84 | 0.95373 | YES | YES | 82 | a | 346.23 | 12.77893  | YES | YES |
| 44 | a | 170.75 | 0.01429 | YES | YES | 83 | a | 349.00 | 16.35645  | YES | YES |
| 45 | a | 173.41 | 0.01625 | YES | YES | 84 | a | 352.00 | 19.62660  | YES | YES |
| 46 | a | 174.98 | 0.35838 | YES | YES | 85 | a | 364.17 | 14.61553  | YES | YES |
| 47 | a | 177.95 | 0.12600 | YES | YES | 86 | a | 371.80 | 5.65270   | YES | YES |
| 48 | a | 182.15 | 0.74328 | YES | YES | 87 | a | 377.65 | 121.93418 | YES | YES |
| 49 | a | 182.28 | 0.72896 | YES | YES | 88 | a | 392.34 | 81.00121  | YES | YES |
| 50 | a | 186.10 | 0.42500 | YES | YES | 89 | a | 393.88 | 18.64947  | YES | YES |
| 51 | a | 190.94 | 0.55083 | YES | YES | 90 | a | 401.09 | 219.78032 | YES | YES |
| 52 | a | 205.77 | 0.80831 | YES | YES | 91 | a | 402.21 | 215.04327 | YES | YES |
| 53 | a | 209.50 | 1.35746 | YES | YES | 92 | a | 424.17 | 24.77805  | YES | YES |
| 54 | a | 217.84 | 0.27212 | YES | YES | 93 | a | 441.86 | 1.36882   | YES | YES |
| 55 | a | 221.17 | 2.20352 | YES | YES | 94 | a | 444.19 | 0.86552   | YES | YES |
| 56 | a | 229.63 | 3.75378 | YES | YES | 95 | a | 471.67 | 15.32468  | YES | YES |
| 57 | a | 230.82 | 1.12947 | YES | YES | 96 | a | 486.99 | 39.80083  | YES | YES |

|     |   |        |          |     |     |     |   |         |          |     |     |
|-----|---|--------|----------|-----|-----|-----|---|---------|----------|-----|-----|
| 97  | a | 527.37 | 0.31346  | YES | YES | 136 | a | 970.01  | 11.50211 | YES | YES |
| 98  | a | 538.44 | 0.64480  | YES | YES | 137 | a | 973.03  | 10.00080 | YES | YES |
| 99  | a | 541.52 | 0.05669  | YES | YES | 138 | a | 977.18  | 11.55495 | YES | YES |
| 100 | a | 542.19 | 0.17940  | YES | YES | 139 | a | 981.04  | 8.42352  | YES | YES |
| 101 | a | 542.67 | 0.02147  | YES | YES | 140 | a | 983.73  | 4.16505  | YES | YES |
| 102 | a | 544.20 | 0.28753  | YES | YES | 141 | a | 984.77  | 3.13368  | YES | YES |
| 103 | a | 545.64 | 0.04357  | YES | YES | 142 | a | 985.94  | 5.15529  | YES | YES |
| 104 | a | 547.47 | 0.07315  | YES | YES | 143 | a | 989.23  | 3.29115  | YES | YES |
| 105 | a | 548.57 | 0.05344  | YES | YES | 144 | a | 990.33  | 0.40308  | YES | YES |
| 106 | a | 561.74 | 3.95129  | YES | YES | 145 | a | 991.95  | 1.12463  | YES | YES |
| 107 | a | 563.04 | 4.08659  | YES | YES | 146 | a | 992.55  | 1.85474  | YES | YES |
| 108 | a | 578.36 | 1.95132  | YES | YES | 147 | a | 995.08  | 3.49695  | YES | YES |
| 109 | a | 580.52 | 0.75594  | YES | YES | 148 | a | 995.56  | 4.31053  | YES | YES |
| 110 | a | 584.67 | 1.29145  | YES | YES | 149 | a | 997.25  | 0.75605  | YES | YES |
| 111 | a | 586.49 | 0.79602  | YES | YES | 150 | a | 999.16  | 18.93444 | YES | YES |
| 112 | a | 586.78 | 0.79708  | YES | YES | 151 | a | 1000.56 | 3.63028  | YES | YES |
| 113 | a | 589.83 | 5.81136  | YES | YES | 152 | a | 1004.02 | 8.46044  | YES | YES |
| 114 | a | 591.98 | 12.52460 | YES | YES | 153 | a | 1004.25 | 6.41842  | YES | YES |
| 115 | a | 594.70 | 7.99604  | YES | YES | 154 | a | 1004.97 | 2.82328  | YES | YES |
| 116 | a | 619.52 | 22.13220 | YES | YES | 155 | a | 1006.34 | 0.18791  | YES | YES |
| 117 | a | 637.38 | 0.60852  | YES | YES | 156 | a | 1013.11 | 0.87893  | YES | YES |
| 118 | a | 730.87 | 11.75810 | YES | YES | 157 | a | 1027.73 | 1.94268  | YES | YES |
| 119 | a | 735.90 | 11.53464 | YES | YES | 158 | a | 1040.16 | 6.12182  | YES | YES |
| 120 | a | 772.84 | 53.73045 | YES | YES | 159 | a | 1042.18 | 0.77937  | YES | YES |
| 121 | a | 791.76 | 4.49096  | YES | YES | 160 | a | 1046.19 | 1.65451  | YES | YES |
| 122 | a | 795.36 | 1.62495  | YES | YES | 161 | a | 1047.60 | 3.26381  | YES | YES |
| 123 | a | 796.47 | 1.59225  | YES | YES | 162 | a | 1048.22 | 1.19107  | YES | YES |
| 124 | a | 799.42 | 3.50316  | YES | YES | 163 | a | 1049.42 | 1.19655  | YES | YES |
| 125 | a | 801.77 | 2.09855  | YES | YES | 164 | a | 1050.99 | 10.86433 | YES | YES |
| 126 | a | 803.39 | 2.95695  | YES | YES | 165 | a | 1054.41 | 15.13036 | YES | YES |
| 127 | a | 844.85 | 0.33123  | YES | YES | 166 | a | 1070.69 | 0.73654  | YES | YES |
| 128 | a | 891.47 | 5.41307  | YES | YES | 167 | a | 1072.42 | 1.81262  | YES | YES |
| 129 | a | 893.30 | 4.71611  | YES | YES | 168 | a | 1073.84 | 1.50661  | YES | YES |
| 130 | a | 911.99 | 8.67143  | YES | YES | 169 | a | 1075.58 | 32.58730 | YES | YES |
| 131 | a | 918.17 | 1.16877  | YES | YES | 170 | a | 1100.36 | 2.05131  | YES | YES |
| 132 | a | 919.33 | 0.44125  | YES | YES | 171 | a | 1104.90 | 2.54444  | YES | YES |
| 133 | a | 924.66 | 1.19943  | YES | YES | 172 | a | 1109.29 | 6.17357  | YES | YES |
| 134 | a | 929.59 | 0.83579  | YES | YES | 173 | a | 1137.63 | 7.06334  | YES | YES |
| 135 | a | 936.07 | 0.65322  | YES | YES | 174 | a | 1140.27 | 6.23130  | YES | YES |



|     |   |         |          |     |     |     |   |         |          |     |     |
|-----|---|---------|----------|-----|-----|-----|---|---------|----------|-----|-----|
| 175 | a | 1151.46 | 3.70179  | YES | YES | 214 | a | 1383.64 | 2.62368  | YES | YES |
| 176 | a | 1156.78 | 0.41355  | YES | YES | 215 | a | 1386.08 | 5.22911  | YES | YES |
| 177 | a | 1164.30 | 0.19312  | YES | YES | 216 | a | 1387.38 | 1.16224  | YES | YES |
| 178 | a | 1166.22 | 0.12679  | YES | YES | 217 | a | 1389.15 | 0.97225  | YES | YES |
| 179 | a | 1166.98 | 0.20776  | YES | YES | 218 | a | 1391.79 | 3.46327  | YES | YES |
| 180 | a | 1168.00 | 0.14609  | YES | YES | 219 | a | 1392.25 | 2.02873  | YES | YES |
| 181 | a | 1195.99 | 1.46765  | YES | YES | 220 | a | 1392.94 | 0.62095  | YES | YES |
| 182 | a | 1197.91 | 1.81336  | YES | YES | 221 | a | 1395.55 | 0.24358  | YES | YES |
| 183 | a | 1213.79 | 1.34056  | YES | YES | 222 | a | 1397.04 | 1.57505  | YES | YES |
| 184 | a | 1236.04 | 0.22882  | YES | YES | 223 | a | 1397.63 | 4.54158  | YES | YES |
| 185 | a | 1240.84 | 0.54249  | YES | YES | 224 | a | 1398.73 | 9.72298  | YES | YES |
| 186 | a | 1265.19 | 12.13661 | YES | YES | 225 | a | 1399.19 | 10.38680 | YES | YES |
| 187 | a | 1267.29 | 10.82564 | YES | YES | 226 | a | 1400.76 | 6.74493  | YES | YES |
| 188 | a | 1274.60 | 11.11005 | YES | YES | 227 | a | 1401.21 | 7.61300  | YES | YES |
| 189 | a | 1275.45 | 8.16312  | YES | YES | 228 | a | 1402.32 | 7.62174  | YES | YES |
| 190 | a | 1313.71 | 2.36183  | YES | YES | 229 | a | 1402.79 | 20.97214 | YES | YES |
| 191 | a | 1326.12 | 1.78795  | YES | YES | 230 | a | 1403.66 | 0.85044  | YES | YES |
| 192 | a | 1327.89 | 1.56381  | YES | YES | 231 | a | 1404.58 | 2.30766  | YES | YES |
| 193 | a | 1328.11 | 7.96308  | YES | YES | 232 | a | 1404.92 | 3.10618  | YES | YES |
| 194 | a | 1329.76 | 21.09128 | YES | YES | 233 | a | 1406.20 | 18.04736 | YES | YES |
| 195 | a | 1337.27 | 1.65621  | YES | YES | 234 | a | 1406.64 | 27.20825 | YES | YES |
| 196 | a | 1337.63 | 3.61031  | YES | YES | 235 | a | 1407.18 | 13.15749 | YES | YES |
| 197 | a | 1338.64 | 0.14683  | YES | YES | 236 | a | 1407.88 | 2.57538  | YES | YES |
| 198 | a | 1340.22 | 0.95444  | YES | YES | 237 | a | 1409.08 | 7.06815  | YES | YES |
| 199 | a | 1340.76 | 0.42389  | YES | YES | 238 | a | 1410.54 | 6.55372  | YES | YES |
| 200 | a | 1341.28 | 0.26489  | YES | YES | 239 | a | 1411.06 | 3.29796  | YES | YES |
| 201 | a | 1342.92 | 0.65919  | YES | YES | 240 | a | 1412.51 | 30.94223 | YES | YES |
| 202 | a | 1343.72 | 10.84301 | YES | YES | 241 | a | 1413.04 | 18.04983 | YES | YES |
| 203 | a | 1344.48 | 1.09446  | YES | YES | 242 | a | 1413.91 | 6.69091  | YES | YES |
| 204 | a | 1345.79 | 1.82181  | YES | YES | 243 | a | 1414.88 | 2.32324  | YES | YES |
| 205 | a | 1346.72 | 0.97794  | YES | YES | 244 | a | 1415.65 | 37.74694 | YES | YES |
| 206 | a | 1348.71 | 0.21461  | YES | YES | 245 | a | 1417.79 | 3.82326  | YES | YES |
| 207 | a | 1350.41 | 0.16149  | YES | YES | 246 | a | 1418.25 | 3.67770  | YES | YES |
| 208 | a | 1354.09 | 11.63514 | YES | YES | 247 | a | 1419.15 | 4.21506  | YES | YES |
| 209 | a | 1360.86 | 4.07573  | YES | YES | 248 | a | 1420.23 | 4.38347  | YES | YES |
| 210 | a | 1362.42 | 15.09354 | YES | YES | 249 | a | 1421.42 | 15.02233 | YES | YES |
| 211 | a | 1369.10 | 4.72931  | YES | YES | 250 | a | 1422.56 | 13.07578 | YES | YES |
| 212 | a | 1370.87 | 1.98356  | YES | YES | 251 | a | 1423.59 | 34.59485 | YES | YES |
| 213 | a | 1382.86 | 3.68983  | YES | YES | 252 | a | 1424.90 | 28.20547 | YES | YES |

|     |   |         |          |     |     |     |   |         |          |     |     |
|-----|---|---------|----------|-----|-----|-----|---|---------|----------|-----|-----|
| 253 | a | 1426.77 | 30.85787 | YES | YES | 292 | a | 2990.68 | 8.14376  | YES | YES |
| 254 | a | 1427.81 | 3.89426  | YES | YES | 293 | a | 2991.06 | 17.43677 | YES | YES |
| 255 | a | 1430.38 | 15.36723 | YES | YES | 294 | a | 2991.96 | 8.99149  | YES | YES |
| 256 | a | 1431.46 | 5.90283  | YES | YES | 295 | a | 2995.08 | 58.14272 | YES | YES |
| 257 | a | 1436.99 | 1.91779  | YES | YES | 296 | a | 2996.41 | 6.19036  | YES | YES |
| 258 | a | 1438.60 | 2.31569  | YES | YES | 297 | a | 3000.82 | 8.80923  | YES | YES |
| 259 | a | 1441.53 | 0.45316  | YES | YES | 298 | a | 3011.45 | 4.74727  | YES | YES |
| 260 | a | 1443.37 | 3.98596  | YES | YES | 299 | a | 3011.78 | 10.46001 | YES | YES |
| 261 | a | 1448.35 | 12.41049 | YES | YES | 300 | a | 3014.52 | 7.07837  | YES | YES |
| 262 | a | 1449.78 | 11.19834 | YES | YES | 301 | a | 3017.77 | 10.71367 | YES | YES |
| 263 | a | 1452.61 | 2.16328  | YES | YES | 302 | a | 3018.61 | 7.92616  | YES | YES |
| 264 | a | 1453.59 | 0.38227  | YES | YES | 303 | a | 3019.48 | 11.22874 | YES | YES |
| 265 | a | 1488.06 | 6.16254  | YES | YES | 304 | a | 3021.77 | 9.48375  | YES | YES |
| 266 | a | 1491.14 | 7.04689  | YES | YES | 305 | a | 3022.47 | 7.95076  | YES | YES |
| 267 | a | 1492.25 | 6.71725  | YES | YES | 306 | a | 3024.35 | 6.07068  | YES | YES |
| 268 | a | 1496.90 | 9.20237  | YES | YES | 307 | a | 3028.05 | 1.57349  | YES | YES |
| 269 | a | 1498.02 | 0.70340  | YES | YES | 308 | a | 3028.92 | 8.59673  | YES | YES |
| 270 | a | 1547.49 | 4.32023  | YES | YES | 309 | a | 3029.73 | 4.53329  | YES | YES |
| 271 | a | 2935.78 | 46.88152 | YES | YES | 310 | a | 3035.57 | 5.93603  | YES | YES |
| 272 | a | 2939.45 | 50.55891 | YES | YES | 311 | a | 3038.30 | 3.54907  | YES | YES |
| 273 | a | 2940.02 | 32.50667 | YES | YES | 312 | a | 3039.63 | 5.30963  | YES | YES |
| 274 | a | 2941.63 | 28.14483 | YES | YES | 313 | a | 3043.44 | 22.46276 | YES | YES |
| 275 | a | 2943.90 | 67.55479 | YES | YES | 314 | a | 3044.03 | 1.22440  | YES | YES |
| 276 | a | 2945.54 | 14.16951 | YES | YES | 315 | a | 3045.21 | 3.78810  | YES | YES |
| 277 | a | 2948.11 | 8.63348  | YES | YES | 316 | a | 3045.41 | 13.55561 | YES | YES |
| 278 | a | 2948.28 | 30.15977 | YES | YES | 317 | a | 3045.78 | 9.09652  | YES | YES |
| 279 | a | 2950.39 | 16.19158 | YES | YES | 318 | a | 3048.22 | 0.39924  | YES | YES |
| 280 | a | 2950.98 | 53.77423 | YES | YES | 319 | a | 3049.26 | 5.71168  | YES | YES |
| 281 | a | 2951.12 | 35.28571 | YES | YES | 320 | a | 3049.82 | 10.20782 | YES | YES |
| 282 | a | 2952.23 | 34.54956 | YES | YES | 321 | a | 3050.02 | 7.83651  | YES | YES |
| 283 | a | 2953.35 | 21.68442 | YES | YES | 322 | a | 3052.85 | 8.31256  | YES | YES |
| 284 | a | 2953.79 | 34.87597 | YES | YES | 323 | a | 3053.40 | 9.92941  | YES | YES |
| 285 | a | 2955.96 | 32.41511 | YES | YES | 324 | a | 3056.11 | 4.38826  | YES | YES |
| 286 | a | 2956.93 | 18.13775 | YES | YES | 325 | a | 3056.35 | 8.70302  | YES | YES |
| 287 | a | 2958.14 | 27.76900 | YES | YES | 326 | a | 3056.67 | 12.73828 | YES | YES |
| 288 | a | 2958.73 | 31.43339 | YES | YES | 327 | a | 3066.63 | 6.11444  | YES | YES |
| 289 | a | 2959.59 | 25.54027 | YES | YES | 328 | a | 3066.81 | 5.63690  | YES | YES |
| 290 | a | 2962.41 | 26.06602 | YES | YES | 329 | a | 3067.23 | 7.04840  | YES | YES |
| 291 | a | 2966.57 | 24.18975 | YES | YES | 330 | a | 3069.85 | 6.26941  | YES | YES |

|     |   |         |         |     |     |
|-----|---|---------|---------|-----|-----|
| 331 | a | 3072.17 | 4.82948 | YES | YES |
| 332 | a | 3080.69 | 5.95717 | YES | YES |
| 333 | a | 3084.53 | 3.89811 | YES | YES |
| 334 | a | 3096.34 | 1.51946 | YES | YES |
| 335 | a | 3099.94 | 2.30917 | YES | YES |
| 336 | a | 3103.80 | 5.55604 | YES | YES |

\$end

**[(Me<sub>3</sub>TACN)Al(TICp\*)(AlCp\*)<sub>2</sub>]<sup>+</sup>**

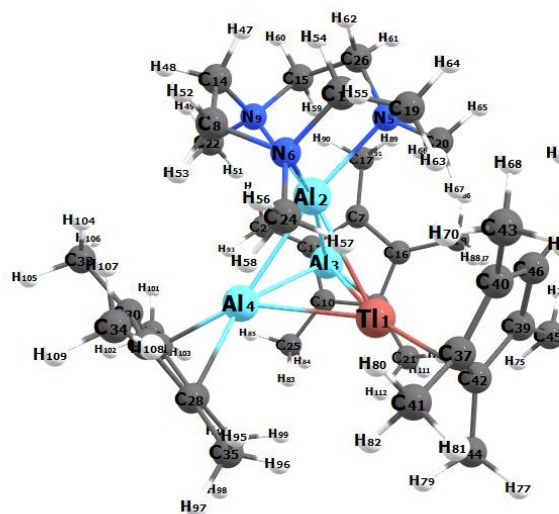

|   |            |            |            |
|---|------------|------------|------------|
| C | -2.8105150 | 0.3955465  | -3.0199856 |
| C | -4.5210103 | -2.6917800 | -0.7636408 |
| C | 1.3731506  | 2.8481859  | -1.4817633 |
| C | -3.7694184 | -2.3360922 | 2.3428928  |
| C | 0.4733173  | -0.9716995 | -4.3318871 |
| C | -2.6498235 | 1.9931517  | 2.3473733  |
| C | -1.6310235 | 2.9540000  | 2.0100005  |
| C | -1.9967443 | 3.5732759  | 0.7675242  |
| C | -3.2112455 | 2.9617651  | 0.3071129  |
| C | -3.6218333 | 1.9866673  | 1.2886484  |
| C | -4.8802206 | 1.1710363  | 1.2268687  |
| C | -3.9909222 | 3.3637882  | -0.9111534 |
| C | -1.2984313 | 4.7294537  | 0.1155640  |
| C | -0.4327843 | 3.2705897  | 2.8567590  |
| C | -2.6399195 | 1.1493728  | 3.5875717  |
| C | 3.5347028  | 1.1633325  | 1.2637673  |
| C | 4.7631882  | -1.6607666 | -0.9169019 |
| C | 3.5094721  | -1.1835791 | 1.3105135  |
| C | 4.1340693  | 0.6794624  | 0.0724340  |
| C | 3.4730974  | 2.5930289  | 1.7212688  |
| C | 3.1289016  | 0.0125252  | 2.0569001  |
| C | 4.8375316  | 1.5186998  | -0.9592249 |
| C | 2.8819566  | 0.0449956  | 3.5469668  |
| C | 3.4400517  | -2.5883915 | 1.8391030  |
| C | 4.1144245  | -0.7630112 | 0.0992597  |
| H | -0.4223601 | 1.3998627  | -5.0353568 |
| H | -1.9607248 | 2.1320269  | -4.5588205 |
| H | -3.4667981 | 0.3375851  | -3.9148617 |
| H | -3.0419699 | 1.3089619  | -2.4434843 |
| H | -2.9953058 | -0.4711692 | -2.3558320 |
| H | 0.0226773  | 3.5395919  | -3.8394147 |
| H | -0.9908123 | 3.0082322  | -2.4576613 |
| H | 1.5695158  | 1.6083790  | -4.5245233 |
| H | 2.7921080  | 2.2274110  | -3.4019236 |
| H | 1.7869514  | 3.7937579  | -1.8930580 |
| H | 2.1577126  | 2.2873454  | -0.9389609 |
| H | 0.5673467  | 3.0678500  | -0.7598266 |
| H | -1.4218503 | -1.6761999 | -3.5481149 |
| H | -1.5522745 | -0.8655790 | -5.1421991 |

Method: (RI)-BP86(D3BJ)/def2-SVP

Symmetry: c1

Cartesian coordinates in Ångström:

|    |            |            |            |
|----|------------|------------|------------|
| Ti | 0.8503744  | -0.0786436 | 0.9861444  |
| Al | -0.1503629 | 0.2673434  | -1.6279653 |
| Al | -1.4664514 | -1.4876126 | 0.0317032  |
| Al | -1.6340872 | 1.2639883  | 0.4365182  |
| N  | 1.1746062  | -0.7727769 | -3.0335547 |
| N  | 0.8289554  | 1.9956211  | -2.5629032 |
| C  | -2.0503057 | -3.5873615 | -0.7893497 |
| C  | -0.3054486 | 2.6510655  | -3.2544964 |
| N  | -1.3815004 | 0.4085409  | -3.4097251 |
| C  | -2.8639373 | -2.8340165 | 1.2576986  |
| C  | -3.1922898 | -2.9972306 | -0.1328223 |
| C  | -1.5127923 | -3.2805267 | 1.4510578  |
| C  | 1.9189760  | 1.5480544  | -3.4756826 |
| C  | -1.0415832 | 1.6600362  | -4.1560192 |
| C  | -1.0380801 | -0.8324415 | -4.1558436 |
| C  | -1.0156200 | -3.7620025 | 0.1896021  |
| C  | -1.9996370 | -4.0212856 | -2.2252919 |
| C  | 0.3452120  | -4.3616534 | -0.0149134 |
| C  | 2.3498825  | 0.1304894  | -3.1176193 |
| C  | 1.5625942  | -2.0646407 | -2.4256535 |
| C  | -0.7656428 | -3.2867136 | 2.7516082  |

H 0.7048044 -1.9709500 -4.7551573  
H 0.8498344 -0.2364238 -5.0684969  
H 2.8151806 0.1268332 -2.1084788  
H 3.1025288 -0.2477069 -3.8441217  
H 2.3097730 -2.5912943 -3.0567461  
H 0.6627505 -2.6914997 -2.3006799  
H 1.9870545 -1.8752723 -1.4207452  
H 4.8310609 1.0563336 -1.9692534  
H 5.9111109 1.6649683 -0.7044213  
H 4.4048617 2.5370503 -1.0491314  
H 4.6453674 -1.2926883 -1.9584437  
H 4.3573039 -2.6921726 -0.8826690  
H 5.8598309 -1.7484816 -0.7487995  
H 3.4031167 -3.3396305 1.0239078  
H 2.5508738 -2.7541575 2.4814247  
H 4.3280360 -2.8414913 2.4610000  
H 3.8419890 0.0499141 4.1100242  
H 2.3072124 -0.8357475 3.8984896  
H 2.3227158 0.9500996 3.8609006  
H 3.3620717 3.3039398 0.8753877  
H 4.3966692 2.8973699 2.2633171  
H 2.6266022 2.7712755 2.4143342  
H -3.2668810 -1.5878996 2.9874482  
H -4.0903157 -3.1706233 3.0011196  
H -4.6858436 -1.8730980 1.9319399  
H 0.5252356 -4.6296800 -1.0730247  
H 0.4613593 -5.2917380 0.5789713  
H 1.1549499 -3.6730533 0.3052767  
H -0.9800247 -3.9439180 -2.6530840  
H -2.6830661 -3.4242438 -2.8618584  
H -2.3106458 -5.0820383 -2.3366129  
H -4.4318569 -2.5238350 -1.8553181  
H -4.9873880 -1.7877775 -0.3239060  
H -5.2370936 -3.5297674 -0.6252993  
H 0.3833753 3.7267705 2.2635754  
H -0.0226610 2.3594838 3.3374749  
H -0.6887440 3.9832768 3.6695496  
H -2.5424861 1.7779699 4.4957068  
H -1.7880191 0.4330466 3.5900555

H -3.5714856 0.5626214 3.6890964  
H -5.0726901 0.7806926 0.2063450  
H -5.7655256 1.7750732 1.5175890  
H -4.8326475 0.3020722 1.9080144  
H -3.3315982 3.6660881 -1.7508478  
H -4.6486167 4.2341322 -0.6981837  
H -4.6499889 2.5483620 -1.2685650  
H -1.3301196 4.6767212 -0.9915153  
H -0.2379420 4.8046801 0.4244690  
H -1.7825287 5.6888594 0.3987359  
H 0.3289952 -3.2220923 2.5929583  
H -0.9611732 -4.2183805 3.3242744  
H -1.0602919 -2.4348666 3.3960747

SCF energy GEOOPT = -2589.015516359 H

ZPE = 2488. kJ/mol

FREEH energy = 2649.62 kJ/mol

FREEH entropy = 1.39584 kJ/mol/K

\$vibrational spectrum

| #  | mode | symmetry | wave number          | IR intensity | selection rules |
|----|------|----------|----------------------|--------------|-----------------|
| #  |      |          | cm <sup>**(-1)</sup> | km/mol       | IR RAMAN        |
| 1  |      |          | -0.00                | 0.00000      | - -             |
| 2  |      |          | -0.00                | 0.00000      | - -             |
| 3  |      |          | 0.00                 | 0.00000      | - -             |
| 4  |      |          | 0.00                 | 0.00000      | - -             |
| 5  |      |          | 0.00                 | 0.00000      | - -             |
| 6  |      |          | 0.00                 | 0.00000      | - -             |
| 7  | a    |          | 12.00                | 0.24805      | YES YES         |
| 8  | a    |          | 19.60                | 0.02415      | YES YES         |
| 9  | a    |          | 24.64                | 0.01845      | YES YES         |
| 10 | a    |          | 31.24                | 0.64467      | YES YES         |
| 11 | a    |          | 33.94                | 0.21529      | YES YES         |
| 12 | a    |          | 39.29                | 0.19534      | YES YES         |
| 13 | a    |          | 43.65                | 0.32816      | YES YES         |
| 14 | a    |          | 49.57                | 0.21487      | YES YES         |
| 15 | a    |          | 52.86                | 0.28937      | YES YES         |
| 16 | a    |          | 57.77                | 0.16779      | YES YES         |
| 17 | a    |          | 60.70                | 0.04518      | YES YES         |

|    |   |        |         |     |     |    |   |        |           |     |     |
|----|---|--------|---------|-----|-----|----|---|--------|-----------|-----|-----|
| 18 | a | 63.75  | 0.20427 | YES | YES | 57 | a | 224.75 | 0.37642   | YES | YES |
| 19 | a | 66.73  | 0.05588 | YES | YES | 58 | a | 228.17 | 13.76151  | YES | YES |
| 20 | a | 72.29  | 0.90261 | YES | YES | 59 | a | 232.90 | 17.99606  | YES | YES |
| 21 | a | 76.80  | 0.34338 | YES | YES | 60 | a | 234.67 | 42.75975  | YES | YES |
| 22 | a | 82.49  | 0.43513 | YES | YES | 61 | a | 254.40 | 1.20453   | YES | YES |
| 23 | a | 87.97  | 0.15205 | YES | YES | 62 | a | 255.93 | 0.48314   | YES | YES |
| 24 | a | 90.14  | 0.06633 | YES | YES | 63 | a | 258.45 | 0.46063   | YES | YES |
| 25 | a | 94.07  | 0.72105 | YES | YES | 64 | a | 258.89 | 0.18994   | YES | YES |
| 26 | a | 95.04  | 0.13190 | YES | YES | 65 | a | 262.63 | 1.00486   | YES | YES |
| 27 | a | 99.93  | 0.27074 | YES | YES | 66 | a | 264.55 | 0.29316   | YES | YES |
| 28 | a | 107.66 | 0.28592 | YES | YES | 67 | a | 266.66 | 0.19196   | YES | YES |
| 29 | a | 108.90 | 0.34641 | YES | YES | 68 | a | 269.80 | 0.35650   | YES | YES |
| 30 | a | 112.92 | 0.09760 | YES | YES | 69 | a | 271.81 | 0.34821   | YES | YES |
| 31 | a | 118.75 | 0.06036 | YES | YES | 70 | a | 273.76 | 4.68619   | YES | YES |
| 32 | a | 119.80 | 0.17445 | YES | YES | 71 | a | 275.66 | 0.14369   | YES | YES |
| 33 | a | 122.38 | 0.67502 | YES | YES | 72 | a | 276.38 | 0.70941   | YES | YES |
| 34 | a | 124.66 | 0.76212 | YES | YES | 73 | a | 279.74 | 0.15939   | YES | YES |
| 35 | a | 125.00 | 0.11900 | YES | YES | 74 | a | 280.59 | 1.02104   | YES | YES |
| 36 | a | 129.84 | 0.10558 | YES | YES | 75 | a | 283.80 | 1.53789   | YES | YES |
| 37 | a | 136.14 | 4.11759 | YES | YES | 76 | a | 284.12 | 0.31929   | YES | YES |
| 38 | a | 145.19 | 0.69024 | YES | YES | 77 | a | 289.14 | 9.87696   | YES | YES |
| 39 | a | 146.50 | 0.27444 | YES | YES | 78 | a | 294.95 | 6.38589   | YES | YES |
| 40 | a | 153.77 | 0.29384 | YES | YES | 79 | a | 322.70 | 52.45391  | YES | YES |
| 41 | a | 159.75 | 0.34150 | YES | YES | 80 | a | 327.50 | 4.24719   | YES | YES |
| 42 | a | 162.62 | 0.24029 | YES | YES | 81 | a | 327.98 | 7.08802   | YES | YES |
| 43 | a | 164.79 | 0.20573 | YES | YES | 82 | a | 330.10 | 13.32454  | YES | YES |
| 44 | a | 166.02 | 0.00503 | YES | YES | 83 | a | 347.29 | 121.04243 | YES | YES |
| 45 | a | 168.23 | 0.79094 | YES | YES | 84 | a | 356.16 | 17.80716  | YES | YES |
| 46 | a | 169.34 | 0.22401 | YES | YES | 85 | a | 364.03 | 13.85700  | YES | YES |
| 47 | a | 172.85 | 0.01629 | YES | YES | 86 | a | 367.87 | 10.80657  | YES | YES |
| 48 | a | 174.75 | 0.71893 | YES | YES | 87 | a | 377.56 | 7.93411   | YES | YES |
| 49 | a | 176.81 | 0.55755 | YES | YES | 88 | a | 393.46 | 26.72171  | YES | YES |
| 50 | a | 179.16 | 0.05202 | YES | YES | 89 | a | 395.08 | 78.81611  | YES | YES |
| 51 | a | 185.04 | 1.50290 | YES | YES | 90 | a | 398.18 | 83.89429  | YES | YES |
| 52 | a | 198.68 | 0.54552 | YES | YES | 91 | a | 399.65 | 308.54785 | YES | YES |
| 53 | a | 209.25 | 1.73185 | YES | YES | 92 | a | 422.88 | 28.18340  | YES | YES |
| 54 | a | 211.11 | 1.36347 | YES | YES | 93 | a | 438.21 | 1.39254   | YES | YES |
| 55 | a | 215.24 | 0.97656 | YES | YES | 94 | a | 442.12 | 3.56946   | YES | YES |
| 56 | a | 220.75 | 0.12969 | YES | YES | 95 | a | 465.48 | 82.97296  | YES | YES |

|     |   |        |          |     |     |     |   |         |          |     |     |
|-----|---|--------|----------|-----|-----|-----|---|---------|----------|-----|-----|
| 96  | a | 475.99 | 37.44071 | YES | YES | 135 | a | 931.58  | 0.95919  | YES | YES |
| 97  | a | 533.11 | 0.10730  | YES | YES | 136 | a | 969.55  | 13.75665 | YES | YES |
| 98  | a | 536.73 | 0.09999  | YES | YES | 137 | a | 970.30  | 9.09942  | YES | YES |
| 99  | a | 541.48 | 0.14663  | YES | YES | 138 | a | 975.94  | 14.62857 | YES | YES |
| 100 | a | 542.50 | 0.05537  | YES | YES | 139 | a | 978.85  | 21.19254 | YES | YES |
| 101 | a | 542.70 | 0.01152  | YES | YES | 140 | a | 982.62  | 8.96276  | YES | YES |
| 102 | a | 543.52 | 0.06895  | YES | YES | 141 | a | 985.22  | 5.51652  | YES | YES |
| 103 | a | 544.22 | 0.16842  | YES | YES | 142 | a | 985.83  | 2.59465  | YES | YES |
| 104 | a | 545.40 | 0.30162  | YES | YES | 143 | a | 989.15  | 2.07736  | YES | YES |
| 105 | a | 547.12 | 0.07310  | YES | YES | 144 | a | 989.82  | 6.04953  | YES | YES |
| 106 | a | 560.20 | 3.64700  | YES | YES | 145 | a | 993.72  | 0.12039  | YES | YES |
| 107 | a | 562.56 | 4.60276  | YES | YES | 146 | a | 994.42  | 0.86713  | YES | YES |
| 108 | a | 578.47 | 0.35605  | YES | YES | 147 | a | 995.27  | 8.70820  | YES | YES |
| 109 | a | 578.78 | 0.61671  | YES | YES | 148 | a | 996.92  | 0.11650  | YES | YES |
| 110 | a | 583.55 | 1.29970  | YES | YES | 149 | a | 997.45  | 1.37132  | YES | YES |
| 111 | a | 584.04 | 0.58164  | YES | YES | 150 | a | 998.05  | 2.33723  | YES | YES |
| 112 | a | 586.53 | 0.76866  | YES | YES | 151 | a | 998.57  | 16.42748 | YES | YES |
| 113 | a | 590.70 | 9.44084  | YES | YES | 152 | a | 999.51  | 1.02818  | YES | YES |
| 114 | a | 592.13 | 13.53466 | YES | YES | 153 | a | 1001.41 | 14.95269 | YES | YES |
| 115 | a | 594.02 | 4.50732  | YES | YES | 154 | a | 1002.03 | 0.92651  | YES | YES |
| 116 | a | 610.17 | 8.06852  | YES | YES | 155 | a | 1005.61 | 0.18719  | YES | YES |
| 117 | a | 637.85 | 0.22549  | YES | YES | 156 | a | 1010.38 | 2.19043  | YES | YES |
| 118 | a | 728.12 | 14.24175 | YES | YES | 157 | a | 1026.47 | 1.90436  | YES | YES |
| 119 | a | 735.75 | 11.14016 | YES | YES | 158 | a | 1040.10 | 3.87035  | YES | YES |
| 120 | a | 770.18 | 58.43675 | YES | YES | 159 | a | 1041.65 | 1.01074  | YES | YES |
| 121 | a | 793.25 | 5.57860  | YES | YES | 160 | a | 1045.95 | 1.79546  | YES | YES |
| 122 | a | 796.74 | 1.77616  | YES | YES | 161 | a | 1047.15 | 5.45737  | YES | YES |
| 123 | a | 797.51 | 1.44381  | YES | YES | 162 | a | 1048.39 | 4.17265  | YES | YES |
| 124 | a | 798.86 | 3.91918  | YES | YES | 163 | a | 1049.09 | 2.94724  | YES | YES |
| 125 | a | 801.30 | 4.29578  | YES | YES | 164 | a | 1050.09 | 1.22711  | YES | YES |
| 126 | a | 803.08 | 0.32538  | YES | YES | 165 | a | 1052.25 | 13.22544 | YES | YES |
| 127 | a | 845.35 | 0.49807  | YES | YES | 166 | a | 1071.83 | 1.15835  | YES | YES |
| 128 | a | 890.42 | 5.04532  | YES | YES | 167 | a | 1072.09 | 0.80668  | YES | YES |
| 129 | a | 893.25 | 5.15797  | YES | YES | 168 | a | 1074.30 | 34.16124 | YES | YES |
| 130 | a | 912.05 | 6.56265  | YES | YES | 169 | a | 1075.05 | 1.17670  | YES | YES |
| 131 | a | 919.45 | 0.27189  | YES | YES | 170 | a | 1102.04 | 1.64780  | YES | YES |
| 132 | a | 920.19 | 0.06221  | YES | YES | 171 | a | 1102.82 | 1.15304  | YES | YES |
| 133 | a | 923.32 | 1.00654  | YES | YES | 172 | a | 1107.66 | 7.12177  | YES | YES |
| 134 | a | 926.91 | 0.20846  | YES | YES | 173 | a | 1136.92 | 5.69263  | YES | YES |

|     |   |         |          |     |     |     |   |         |          |     |     |
|-----|---|---------|----------|-----|-----|-----|---|---------|----------|-----|-----|
| 174 | a | 1138.29 | 7.61984  | YES | YES | 213 | a | 1383.24 | 0.60375  | YES | YES |
| 175 | a | 1150.39 | 8.85185  | YES | YES | 214 | a | 1384.54 | 0.80285  | YES | YES |
| 176 | a | 1156.21 | 2.69316  | YES | YES | 215 | a | 1387.73 | 6.08377  | YES | YES |
| 177 | a | 1164.46 | 0.26535  | YES | YES | 216 | a | 1388.37 | 1.32799  | YES | YES |
| 178 | a | 1164.78 | 0.12429  | YES | YES | 217 | a | 1389.29 | 2.93592  | YES | YES |
| 179 | a | 1165.63 | 0.02780  | YES | YES | 218 | a | 1389.55 | 3.61600  | YES | YES |
| 180 | a | 1167.03 | 0.28685  | YES | YES | 219 | a | 1391.77 | 5.17947  | YES | YES |
| 181 | a | 1193.20 | 1.16867  | YES | YES | 220 | a | 1392.97 | 4.20179  | YES | YES |
| 182 | a | 1197.50 | 2.05075  | YES | YES | 221 | a | 1393.81 | 4.97447  | YES | YES |
| 183 | a | 1211.76 | 1.08873  | YES | YES | 222 | a | 1396.12 | 1.71313  | YES | YES |
| 184 | a | 1237.43 | 0.09367  | YES | YES | 223 | a | 1397.71 | 9.68670  | YES | YES |
| 185 | a | 1241.14 | 0.04573  | YES | YES | 224 | a | 1398.69 | 6.26839  | YES | YES |
| 186 | a | 1264.41 | 11.93178 | YES | YES | 225 | a | 1399.02 | 6.96049  | YES | YES |
| 187 | a | 1267.75 | 10.55297 | YES | YES | 226 | a | 1400.67 | 11.73834 | YES | YES |
| 188 | a | 1273.54 | 10.12128 | YES | YES | 227 | a | 1400.95 | 1.09947  | YES | YES |
| 189 | a | 1275.13 | 7.10827  | YES | YES | 228 | a | 1402.24 | 2.46908  | YES | YES |
| 190 | a | 1314.13 | 1.71274  | YES | YES | 229 | a | 1402.59 | 5.85520  | YES | YES |
| 191 | a | 1326.66 | 0.81822  | YES | YES | 230 | a | 1403.23 | 11.47832 | YES | YES |
| 192 | a | 1327.48 | 0.60786  | YES | YES | 231 | a | 1404.86 | 8.79124  | YES | YES |
| 193 | a | 1333.26 | 1.86917  | YES | YES | 232 | a | 1405.68 | 0.80488  | YES | YES |
| 194 | a | 1335.81 | 28.51358 | YES | YES | 233 | a | 1406.22 | 9.41085  | YES | YES |
| 195 | a | 1338.06 | 1.11225  | YES | YES | 234 | a | 1407.52 | 6.54845  | YES | YES |
| 196 | a | 1339.05 | 0.59748  | YES | YES | 235 | a | 1408.00 | 7.28035  | YES | YES |
| 197 | a | 1340.21 | 2.63187  | YES | YES | 236 | a | 1408.08 | 15.31560 | YES | YES |
| 198 | a | 1340.81 | 2.12008  | YES | YES | 237 | a | 1408.88 | 36.20691 | YES | YES |
| 199 | a | 1342.30 | 5.07969  | YES | YES | 238 | a | 1410.67 | 8.92769  | YES | YES |
| 200 | a | 1343.03 | 7.06288  | YES | YES | 239 | a | 1411.18 | 21.94137 | YES | YES |
| 201 | a | 1343.48 | 8.85078  | YES | YES | 240 | a | 1411.43 | 1.86307  | YES | YES |
| 202 | a | 1344.31 | 2.19975  | YES | YES | 241 | a | 1412.55 | 4.99590  | YES | YES |
| 203 | a | 1345.80 | 12.82368 | YES | YES | 242 | a | 1412.96 | 14.07013 | YES | YES |
| 204 | a | 1346.17 | 4.04026  | YES | YES | 243 | a | 1413.53 | 11.44323 | YES | YES |
| 205 | a | 1348.09 | 2.77319  | YES | YES | 244 | a | 1414.96 | 16.57774 | YES | YES |
| 206 | a | 1349.63 | 0.10306  | YES | YES | 245 | a | 1415.26 | 39.10156 | YES | YES |
| 207 | a | 1350.91 | 1.17721  | YES | YES | 246 | a | 1416.47 | 15.97859 | YES | YES |
| 208 | a | 1355.37 | 10.36727 | YES | YES | 247 | a | 1417.51 | 40.13702 | YES | YES |
| 209 | a | 1362.27 | 3.85476  | YES | YES | 248 | a | 1418.09 | 18.39365 | YES | YES |
| 210 | a | 1366.36 | 5.11606  | YES | YES | 249 | a | 1420.46 | 11.91202 | YES | YES |
| 211 | a | 1369.56 | 21.73541 | YES | YES | 250 | a | 1421.57 | 3.65064  | YES | YES |
| 212 | a | 1373.63 | 1.54790  | YES | YES | 251 | a | 1422.97 | 5.86261  | YES | YES |



|     |   |         |          |     |     |     |   |         |          |     |     |
|-----|---|---------|----------|-----|-----|-----|---|---------|----------|-----|-----|
| 252 | a | 1424.16 | 42.91311 | YES | YES | 291 | a | 2965.49 | 23.42923 | YES | YES |
| 253 | a | 1425.40 | 33.52265 | YES | YES | 292 | a | 2989.98 | 10.21827 | YES | YES |
| 254 | a | 1426.60 | 5.63253  | YES | YES | 293 | a | 2991.49 | 10.14880 | YES | YES |
| 255 | a | 1430.07 | 10.79894 | YES | YES | 294 | a | 2992.40 | 30.65427 | YES | YES |
| 256 | a | 1434.18 | 4.06026  | YES | YES | 295 | a | 2995.59 | 12.19008 | YES | YES |
| 257 | a | 1437.03 | 2.68018  | YES | YES | 296 | a | 2996.41 | 30.96491 | YES | YES |
| 258 | a | 1439.71 | 1.20734  | YES | YES | 297 | a | 2998.32 | 9.25081  | YES | YES |
| 259 | a | 1444.46 | 0.38896  | YES | YES | 298 | a | 3001.40 | 7.67848  | YES | YES |
| 260 | a | 1447.84 | 12.43775 | YES | YES | 299 | a | 3007.14 | 8.69519  | YES | YES |
| 261 | a | 1449.19 | 16.19839 | YES | YES | 300 | a | 3009.06 | 3.78136  | YES | YES |
| 262 | a | 1451.10 | 1.13975  | YES | YES | 301 | a | 3011.07 | 5.76519  | YES | YES |
| 263 | a | 1453.54 | 1.05281  | YES | YES | 302 | a | 3015.56 | 14.03948 | YES | YES |
| 264 | a | 1455.39 | 1.99010  | YES | YES | 303 | a | 3021.38 | 0.86654  | YES | YES |
| 265 | a | 1471.85 | 0.52455  | YES | YES | 304 | a | 3021.47 | 15.73702 | YES | YES |
| 266 | a | 1484.41 | 6.86991  | YES | YES | 305 | a | 3022.51 | 10.59592 | YES | YES |
| 267 | a | 1486.30 | 5.63371  | YES | YES | 306 | a | 3026.39 | 16.16285 | YES | YES |
| 268 | a | 1496.25 | 7.52418  | YES | YES | 307 | a | 3026.91 | 8.25023  | YES | YES |
| 269 | a | 1497.73 | 9.62631  | YES | YES | 308 | a | 3029.06 | 5.50948  | YES | YES |
| 270 | a | 1514.55 | 2.25411  | YES | YES | 309 | a | 3029.93 | 3.90503  | YES | YES |
| 271 | a | 2934.65 | 92.98917 | YES | YES | 310 | a | 3030.14 | 5.10586  | YES | YES |
| 272 | a | 2934.92 | 35.58451 | YES | YES | 311 | a | 3030.25 | 3.92348  | YES | YES |
| 273 | a | 2935.44 | 19.45638 | YES | YES | 312 | a | 3032.28 | 7.39449  | YES | YES |
| 274 | a | 2937.12 | 54.44573 | YES | YES | 313 | a | 3035.13 | 9.63360  | YES | YES |
| 275 | a | 2938.01 | 58.97253 | YES | YES | 314 | a | 3036.37 | 11.77063 | YES | YES |
| 276 | a | 2938.67 | 43.38803 | YES | YES | 315 | a | 3037.89 | 2.57982  | YES | YES |
| 277 | a | 2944.49 | 25.70493 | YES | YES | 316 | a | 3039.61 | 16.88764 | YES | YES |
| 278 | a | 2948.30 | 12.97237 | YES | YES | 317 | a | 3041.10 | 9.57670  | YES | YES |
| 279 | a | 2948.39 | 31.69712 | YES | YES | 318 | a | 3045.46 | 3.50323  | YES | YES |
| 280 | a | 2950.50 | 44.57008 | YES | YES | 319 | a | 3047.29 | 5.11026  | YES | YES |
| 281 | a | 2951.16 | 26.91609 | YES | YES | 320 | a | 3047.90 | 1.55607  | YES | YES |
| 282 | a | 2951.73 | 31.38270 | YES | YES | 321 | a | 3048.78 | 13.86878 | YES | YES |
| 283 | a | 2954.82 | 31.93842 | YES | YES | 322 | a | 3050.69 | 8.50361  | YES | YES |
| 284 | a | 2955.87 | 29.10031 | YES | YES | 323 | a | 3052.15 | 3.87703  | YES | YES |
| 285 | a | 2956.94 | 13.14882 | YES | YES | 324 | a | 3053.52 | 8.46721  | YES | YES |
| 286 | a | 2957.01 | 29.96499 | YES | YES | 325 | a | 3054.10 | 13.05311 | YES | YES |
| 287 | a | 2957.87 | 32.78902 | YES | YES | 326 | a | 3056.96 | 4.59828  | YES | YES |
| 288 | a | 2958.77 | 21.16724 | YES | YES | 327 | a | 3057.44 | 6.52739  | YES | YES |
| 289 | a | 2959.60 | 22.81168 | YES | YES | 328 | a | 3058.35 | 5.38635  | YES | YES |
| 290 | a | 2960.24 | 22.40156 | YES | YES | 329 | a | 3060.22 | 8.03775  | YES | YES |

|     |   |         |         |     |     |
|-----|---|---------|---------|-----|-----|
| 330 | a | 3065.26 | 7.89762 | YES | YES |
| 331 | a | 3073.97 | 7.18418 | YES | YES |
| 332 | a | 3075.17 | 4.44580 | YES | YES |
| 333 | a | 3080.50 | 3.28420 | YES | YES |
| 334 | a | 3090.13 | 2.58460 | YES | YES |
| 335 | a | 3094.28 | 3.05506 | YES | YES |
| 336 | a | 3094.97 | 2.03401 | YES | YES |

Send

**[Ga(Me<sub>3</sub>TACN)]<sup>+</sup>**

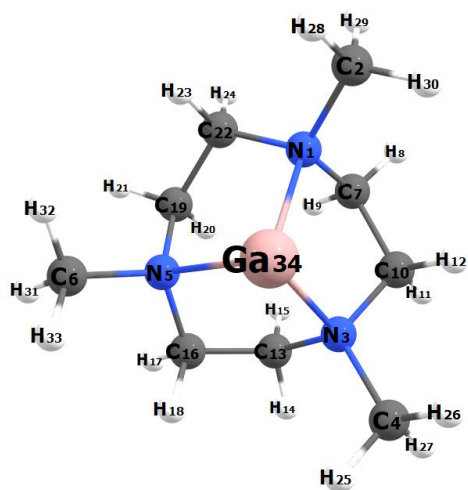

Method: (RI-)BP86(D3BJ)/def2-SVP

Symmetry: c1

Cartesian coordinates in Ångström:

|   |            |           |            |
|---|------------|-----------|------------|
| N | -1.9923808 | 2.3811235 | 15.6405954 |
| C | -2.5359373 | 1.1101549 | 16.1640775 |
| N | -0.5061701 | 3.0245541 | 13.2076149 |
| C | -0.1330903 | 2.6007095 | 11.8416141 |
| N | -2.5491627 | 4.8634074 | 14.2015143 |
| C | -3.8083074 | 5.5815207 | 13.9123135 |
| C | -0.5048808 | 2.3788173 | 15.6267656 |
| H | -0.1095025 | 1.6115172 | 16.3254685 |
| H | -0.1346726 | 3.3472158 | 16.0137719 |
| C | 0.0612377  | 2.1141416 | 14.2306197 |
| H | 1.1743133  | 2.1763379 | 14.2604994 |
| H | -0.1882424 | 1.0791992 | 13.9158999 |
| C | -0.1975823 | 4.4608839 | 13.4415008 |
| H | 0.5580218  | 4.8213624 | 12.7117949 |
| H | 0.2756456  | 4.5754899 | 14.4352232 |
| C | -1.4419637 | 5.3448383 | 13.3414580 |
| H | -1.1707119 | 6.4004912 | 13.5775089 |
| H | -1.8194967 | 5.3423769 | 12.2975263 |
| C | -2.2315591 | 4.8735552 | 15.6547891 |
| H | -1.1572685 | 5.1009369 | 15.7922408 |
| H | -2.7748416 | 5.6955966 | 16.1669994 |
| C | -2.5847462 | 3.5494766 | 16.3344417 |

|    |            |           |            |
|----|------------|-----------|------------|
| H  | -3.6856020 | 3.4064260 | 16.3253812 |
| H  | -2.2791193 | 3.5862101 | 17.4063023 |
| H  | -0.6098806 | 3.2672957 | 11.0981193 |
| H  | -0.4939223 | 1.5703530 | 11.6554534 |
| H  | 0.9688103  | 2.6277986 | 11.6910494 |
| H  | -3.6361584 | 1.0914200 | 16.0389670 |
| H  | -2.2948961 | 0.9745252 | 17.2416384 |
| H  | -2.1147653 | 0.2591035 | 15.5958713 |
| H  | -3.7160937 | 6.6703186 | 14.1211740 |
| H  | -4.6270375 | 5.1689155 | 14.5319569 |
| H  | -4.0843302 | 5.4438878 | 12.8486540 |
| Ga | -2.8333464 | 2.6369690 | 13.4392351 |

SCF energy GEOOPT = -2444.271803112 H

ZPE = 789.1 kJ/mol

FREEH energy = 826.54 kJ/mol

FREEH entropy = 0.47660 kJ/mol/K

Vibrational spectrum

| # mode | symmetry              | wave number | IR intensity | selection rules |
|--------|-----------------------|-------------|--------------|-----------------|
| #      | cm <sup>**</sup> (-1) | km/mol      | IR           | RAMAN           |
| 1      | -0.00                 | 0.00000     | -            | -               |
| 2      | -0.00                 | 0.00000     | -            | -               |
| 3      | 0.00                  | 0.00000     | -            | -               |
| 4      | 0.00                  | 0.00000     | -            | -               |
| 5      | 0.00                  | 0.00000     | -            | -               |
| 6      | 0.00                  | 0.00000     | -            | -               |
| 7      | a                     | 133.90      | 0.45466      | YES YES         |
| 8      | a                     | 134.88      | 0.45991      | YES YES         |
| 9      | a                     | 153.10      | 1.52703      | YES YES         |
| 10     | a                     | 153.62      | 1.53864      | YES YES         |
| 11     | a                     | 176.42      | 0.32310      | YES YES         |
| 12     | a                     | 194.35      | 0.28531      | YES YES         |
| 13     | a                     | 195.96      | 0.28475      | YES YES         |
| 14     | a                     | 240.94      | 2.50288      | YES YES         |
| 15     | a                     | 251.01      | 0.41563      | YES YES         |
| 16     | a                     | 251.61      | 0.41584      | YES YES         |
| 17     | a                     | 254.86      | 0.58708      | YES YES         |
| 18     | a                     | 273.12      | 0.08904      | YES YES         |

|    |   |         |          |     |     |    |   |         |          |     |     |
|----|---|---------|----------|-----|-----|----|---|---------|----------|-----|-----|
| 19 | a | 305.04  | 2.79625  | YES | YES | 58 | a | 1273.31 | 2.02349  | YES | YES |
| 20 | a | 305.47  | 2.77967  | YES | YES | 59 | a | 1281.99 | 12.10976 | YES | YES |
| 21 | a | 372.03  | 15.04947 | YES | YES | 60 | a | 1282.49 | 11.99441 | YES | YES |
| 22 | a | 372.39  | 15.10183 | YES | YES | 61 | a | 1316.41 | 1.93480  | YES | YES |
| 23 | a | 386.81  | 3.56945  | YES | YES | 62 | a | 1333.22 | 2.80892  | YES | YES |
| 24 | a | 430.46  | 0.92896  | YES | YES | 63 | a | 1333.81 | 2.62273  | YES | YES |
| 25 | a | 431.04  | 0.92629  | YES | YES | 64 | a | 1357.54 | 1.99598  | YES | YES |
| 26 | a | 445.69  | 9.18233  | YES | YES | 65 | a | 1364.54 | 3.17353  | YES | YES |
| 27 | a | 488.08  | 24.35159 | YES | YES | 66 | a | 1365.32 | 3.04267  | YES | YES |
| 28 | a | 553.19  | 6.48687  | YES | YES | 67 | a | 1394.53 | 10.97117 | YES | YES |
| 29 | a | 553.64  | 6.48398  | YES | YES | 68 | a | 1396.24 | 2.70309  | YES | YES |
| 30 | a | 579.52  | 0.00331  | YES | YES | 69 | a | 1396.53 | 2.69376  | YES | YES |
| 31 | a | 727.46  | 23.48299 | YES | YES | 70 | a | 1414.82 | 2.17327  | YES | YES |
| 32 | a | 727.80  | 23.48644 | YES | YES | 71 | a | 1415.42 | 2.17697  | YES | YES |
| 33 | a | 766.57  | 41.65705 | YES | YES | 72 | a | 1420.24 | 0.23827  | YES | YES |
| 34 | a | 843.09  | 0.32908  | YES | YES | 73 | a | 1420.55 | 2.62844  | YES | YES |
| 35 | a | 881.87  | 5.71446  | YES | YES | 74 | a | 1421.78 | 33.65995 | YES | YES |
| 36 | a | 882.07  | 5.68762  | YES | YES | 75 | a | 1425.71 | 5.84857  | YES | YES |
| 37 | a | 965.15  | 10.64127 | YES | YES | 76 | a | 1425.85 | 5.32593  | YES | YES |
| 38 | a | 965.48  | 10.51882 | YES | YES | 77 | a | 1427.54 | 0.71310  | YES | YES |
| 39 | a | 975.77  | 7.52168  | YES | YES | 78 | a | 1435.65 | 9.56163  | YES | YES |
| 40 | a | 1002.70 | 47.24938 | YES | YES | 79 | a | 1437.48 | 36.12063 | YES | YES |
| 41 | a | 1003.38 | 47.68501 | YES | YES | 80 | a | 1437.58 | 36.46301 | YES | YES |
| 42 | a | 1007.05 | 0.18551  | YES | YES | 81 | a | 1450.25 | 8.82195  | YES | YES |
| 43 | a | 1024.06 | 0.04002  | YES | YES | 82 | a | 2937.87 | 25.84361 | YES | YES |
| 44 | a | 1053.76 | 15.84323 | YES | YES | 83 | a | 2938.00 | 25.29751 | YES | YES |
| 45 | a | 1053.99 | 15.77639 | YES | YES | 84 | a | 2938.21 | 15.09205 | YES | YES |
| 46 | a | 1081.08 | 33.71421 | YES | YES | 85 | a | 2947.29 | 47.50428 | YES | YES |
| 47 | a | 1103.62 | 4.97362  | YES | YES | 86 | a | 2947.30 | 47.53089 | YES | YES |
| 48 | a | 1103.99 | 4.94696  | YES | YES | 87 | a | 2947.72 | 0.36564  | YES | YES |
| 49 | a | 1109.98 | 5.18824  | YES | YES | 88 | a | 2984.40 | 7.07187  | YES | YES |
| 50 | a | 1134.53 | 16.97050 | YES | YES | 89 | a | 2984.59 | 6.99467  | YES | YES |
| 51 | a | 1135.21 | 17.26413 | YES | YES | 90 | a | 2986.97 | 34.73423 | YES | YES |
| 52 | a | 1199.73 | 3.58644  | YES | YES | 91 | a | 3009.31 | 7.38755  | YES | YES |
| 53 | a | 1199.93 | 3.59606  | YES | YES | 92 | a | 3009.74 | 2.88413  | YES | YES |
| 54 | a | 1215.62 | 0.25770  | YES | YES | 93 | a | 3009.94 | 0.65117  | YES | YES |
| 55 | a | 1239.11 | 2.02338  | YES | YES | 94 | a | 3044.83 | 8.61044  | YES | YES |
| 56 | a | 1239.48 | 1.98071  | YES | YES | 95 | a | 3044.95 | 8.82789  | YES | YES |
| 57 | a | 1267.11 | 14.53937 | YES | YES | 96 | a | 3045.53 | 7.63932  | YES | YES |

|     |   |         |          |     |     |
|-----|---|---------|----------|-----|-----|
| 97  | a | 3045.91 | 0.21950  | YES | YES |
| 98  | a | 3045.97 | 0.81640  | YES | YES |
| 99  | a | 3051.65 | 18.55274 | YES | YES |
| 100 | a | 3078.85 | 0.44766  | YES | YES |
| 101 | a | 3079.07 | 5.48986  | YES | YES |
| 102 | a | 3079.26 | 5.07692  | YES | YES |

\$end

[Ti(Me<sub>3</sub>TACN)]<sup>+</sup>

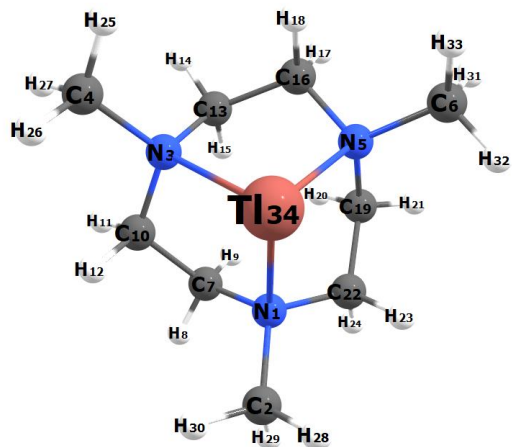

|    |            |           |            |
|----|------------|-----------|------------|
| C  | -2.6057035 | 3.5201738 | 16.3148024 |
| H  | -3.7074978 | 3.3777597 | 16.3057995 |
| H  | -2.3111445 | 3.5849946 | 17.3909082 |
| H  | -0.4724554 | 3.2634660 | 11.0462512 |
| H  | -0.3225448 | 1.5665063 | 11.6044237 |
| H  | 1.0893515  | 2.6759709 | 11.7232804 |
| H  | -3.6109121 | 1.0449233 | 16.2096226 |
| H  | -2.2171904 | 1.0002359 | 17.3471164 |
| H  | -2.0973299 | 0.2108713 | 15.7330018 |
| H  | -3.6580943 | 6.7713932 | 14.1859838 |
| H  | -4.6479333 | 5.3124898 | 14.5528952 |
| H  | -4.0975225 | 5.6198019 | 12.8747330 |
| Ti | -3.0863940 | 2.4639868 | 13.2387709 |

Method: (RI-)BP86(D3BJ)/def2-SVP

Symmetry: c1

Cartesian coordinates in Ångström:

|   |            |           |            |
|---|------------|-----------|------------|
| N | -2.0084003 | 2.3332952 | 15.6658536 |
| C | -2.5053853 | 1.0865544 | 16.2738268 |
| N | -0.4856781 | 3.0116219 | 13.1564066 |
| C | -0.0194209 | 2.6109115 | 11.8173627 |
| N | -2.5947815 | 4.8960336 | 14.1947269 |
| C | -3.8073339 | 5.6941190 | 13.9417160 |
| C | -0.5274790 | 2.3620524 | 15.5993956 |
| H | -0.0943972 | 1.6041098 | 16.2869608 |
| H | -0.1614817 | 3.3348607 | 15.9802575 |
| C | 0.0370824  | 2.1028568 | 14.1993009 |
| H | 1.1523359  | 2.1488838 | 14.2549713 |
| H | -0.2125224 | 1.0668507 | 13.8852036 |
| C | -0.2294559 | 4.4476131 | 13.4226965 |
| H | 0.5235587  | 4.8452344 | 12.7087921 |
| H | 0.2370300  | 4.5586702 | 14.4204016 |
| C | -1.4779102 | 5.3300707 | 13.3282363 |
| H | -1.1811422 | 6.3849911 | 13.5475562 |
| H | -1.8550070 | 5.3276854 | 12.2832945 |
| C | -2.2569067 | 4.8490814 | 15.6377238 |
| H | -1.1802375 | 5.0696748 | 15.7704426 |
| H | -2.7847361 | 5.6592154 | 16.1853150 |

SCF energy GEOOPT = -692.0725466709 H

ZPE = 786.1 kJ/mol

FREEH energy = 824.77 kJ/mol

FREEH entropy = 0.49836 kJ/mol/K

Vibrational spectrum

| # mode | symmetry         | wave number | IR intensity | selection rules |
|--------|------------------|-------------|--------------|-----------------|
| #      | cm <sup>-1</sup> | km/mol      | IR           | RAMAN           |
| 1      | -0.00            | 0.00000     | -            | -               |
| 2      | -0.00            | 0.00000     | -            | -               |
| 3      | 0.00             | 0.00000     | -            | -               |
| 4      | 0.00             | 0.00000     | -            | -               |
| 5      | 0.00             | 0.00000     | -            | -               |
| 6      | 0.00             | 0.00000     | -            | -               |
| 7      | a                | 106.20      | 0.43580      | YES YES         |
| 8      | a                | 107.02      | 0.45206      | YES YES         |
| 9      | a                | 131.34      | 1.28990      | YES YES         |
| 10     | a                | 134.42      | 0.13822      | YES YES         |
| 11     | a                | 135.22      | 0.15211      | YES YES         |
| 12     | a                | 163.60      | 2.96124      | YES YES         |
| 13     | a                | 183.02      | 0.16201      | YES YES         |
| 14     | a                | 184.56      | 0.16167      | YES YES         |
| 15     | a                | 256.00      | 0.43004      | YES YES         |
| 16     | a                | 256.62      | 0.43211      | YES YES         |
| 17     | a                | 259.12      | 0.04599      | YES YES         |

|    |   |         |          |     |     |    |   |         |          |     |     |
|----|---|---------|----------|-----|-----|----|---|---------|----------|-----|-----|
| 18 | a | 274.11  | 0.03112  | YES | YES | 57 | a | 1267.27 | 9.82230  | YES | YES |
| 19 | a | 298.66  | 1.23529  | YES | YES | 58 | a | 1282.40 | 2.58856  | YES | YES |
| 20 | a | 299.20  | 1.22737  | YES | YES | 59 | a | 1290.81 | 11.30290 | YES | YES |
| 21 | a | 364.61  | 10.49833 | YES | YES | 60 | a | 1291.29 | 11.11724 | YES | YES |
| 22 | a | 365.22  | 10.59940 | YES | YES | 61 | a | 1318.67 | 1.22277  | YES | YES |
| 23 | a | 373.48  | 8.62655  | YES | YES | 62 | a | 1338.67 | 7.26390  | YES | YES |
| 24 | a | 405.43  | 13.93006 | YES | YES | 63 | a | 1339.15 | 7.13911  | YES | YES |
| 25 | a | 428.79  | 0.27334  | YES | YES | 64 | a | 1357.97 | 3.10597  | YES | YES |
| 26 | a | 429.15  | 0.24489  | YES | YES | 65 | a | 1363.95 | 3.11047  | YES | YES |
| 27 | a | 474.29  | 4.17387  | YES | YES | 66 | a | 1364.86 | 3.06865  | YES | YES |
| 28 | a | 551.06  | 6.77362  | YES | YES | 67 | a | 1394.75 | 14.03609 | YES | YES |
| 29 | a | 551.58  | 6.74886  | YES | YES | 68 | a | 1395.17 | 5.17429  | YES | YES |
| 30 | a | 571.80  | 0.02056  | YES | YES | 69 | a | 1395.79 | 4.86316  | YES | YES |
| 31 | a | 733.56  | 20.36344 | YES | YES | 70 | a | 1414.58 | 1.26240  | YES | YES |
| 32 | a | 734.08  | 20.44343 | YES | YES | 71 | a | 1415.58 | 1.24530  | YES | YES |
| 33 | a | 753.71  | 42.63871 | YES | YES | 72 | a | 1420.64 | 2.21421  | YES | YES |
| 34 | a | 842.90  | 0.89017  | YES | YES | 73 | a | 1420.98 | 15.14952 | YES | YES |
| 35 | a | 874.04  | 4.54073  | YES | YES | 74 | a | 1421.19 | 14.83657 | YES | YES |
| 36 | a | 874.24  | 4.67208  | YES | YES | 75 | a | 1428.48 | 3.49226  | YES | YES |
| 37 | a | 968.56  | 7.21892  | YES | YES | 76 | a | 1429.05 | 3.34577  | YES | YES |
| 38 | a | 968.67  | 7.26819  | YES | YES | 77 | a | 1430.27 | 0.72554  | YES | YES |
| 39 | a | 978.80  | 9.10455  | YES | YES | 78 | a | 1440.09 | 10.81541 | YES | YES |
| 40 | a | 1008.88 | 52.26465 | YES | YES | 79 | a | 1441.25 | 28.06305 | YES | YES |
| 41 | a | 1009.84 | 53.13935 | YES | YES | 80 | a | 1441.46 | 28.12045 | YES | YES |
| 42 | a | 1013.27 | 0.53730  | YES | YES | 81 | a | 1449.93 | 3.40386  | YES | YES |
| 43 | a | 1025.92 | 0.35665  | YES | YES | 82 | a | 2911.34 | 40.40128 | YES | YES |
| 44 | a | 1063.73 | 15.65035 | YES | YES | 83 | a | 2911.45 | 40.56732 | YES | YES |
| 45 | a | 1063.95 | 15.76916 | YES | YES | 84 | a | 2911.90 | 26.62580 | YES | YES |
| 46 | a | 1090.33 | 30.75647 | YES | YES | 85 | a | 2928.38 | 67.17559 | YES | YES |
| 47 | a | 1106.87 | 5.18498  | YES | YES | 86 | a | 2928.49 | 66.86333 | YES | YES |
| 48 | a | 1107.97 | 5.20554  | YES | YES | 87 | a | 2928.97 | 3.54522  | YES | YES |
| 49 | a | 1111.19 | 1.00693  | YES | YES | 88 | a | 2976.27 | 10.28506 | YES | YES |
| 50 | a | 1134.46 | 23.44126 | YES | YES | 89 | a | 2976.34 | 10.30492 | YES | YES |
| 51 | a | 1135.17 | 23.87514 | YES | YES | 90 | a | 2978.87 | 41.83944 | YES | YES |
| 52 | a | 1204.83 | 5.31198  | YES | YES | 91 | a | 2994.46 | 8.78106  | YES | YES |
| 53 | a | 1205.05 | 5.28095  | YES | YES | 92 | a | 2995.22 | 6.48206  | YES | YES |
| 54 | a | 1221.42 | 0.30126  | YES | YES | 93 | a | 2995.46 | 1.76856  | YES | YES |
| 55 | a | 1243.07 | 4.99729  | YES | YES | 94 | a | 3028.00 | 7.06468  | YES | YES |
| 56 | a | 1243.63 | 5.06858  | YES | YES | 95 | a | 3028.15 | 6.46721  | YES | YES |

|     |   |         |          |     |     |
|-----|---|---------|----------|-----|-----|
| 96  | a | 3028.39 | 6.31594  | YES | YES |
| 97  | a | 3038.02 | 6.78091  | YES | YES |
| 98  | a | 3038.34 | 6.77491  | YES | YES |
| 99  | a | 3045.09 | 21.23808 | YES | YES |
| 100 | a | 3069.35 | 1.87410  | YES | YES |
| 101 | a | 3069.55 | 9.49550  | YES | YES |
| 102 | a | 3070.03 | 7.85966  | YES | YES |

\$end



## Me<sub>3</sub>TACN

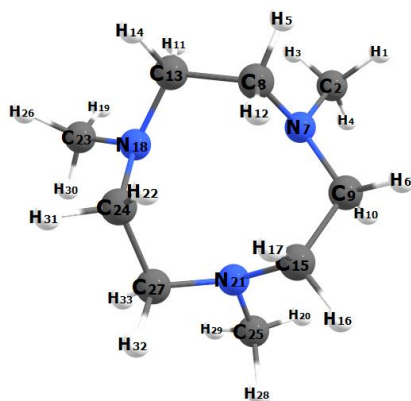

Method: (RI-)BP86(D3BJ)/def2-SVP

Symmetry: c1

Cartesian coordinates in Ångström:

|   |            |           |            |
|---|------------|-----------|------------|
| H | 3.4762254  | 6.1389685 | 3.1947332  |
| C | 2.4226585  | 6.5088258 | 3.3433677  |
| H | 2.0846067  | 6.1418850 | 4.3352369  |
| H | 2.4632131  | 7.6165261 | 3.4021778  |
| H | 2.0173381  | 4.0569218 | 2.7106312  |
| H | 2.5726681  | 6.3172441 | 0.4474763  |
| N | 1.4991462  | 6.0963995 | 2.3147571  |
| C | 1.1694114  | 4.6831008 | 2.3313860  |
| C | 1.6890629  | 6.7208899 | 1.0217011  |
| H | 1.9169822  | 7.7933111 | 1.2062025  |
| H | 0.1421047  | 4.6032964 | 4.2392307  |
| H | 1.0062953  | 4.3311869 | 1.2921482  |
| C | -0.0778158 | 4.3562628 | 3.1778133  |
| H | -0.2312741 | 3.2385841 | 3.1518396  |
| C | 0.4504023  | 6.6349397 | 0.1067682  |
| H | 0.6961576  | 7.1531192 | -0.8555671 |
| H | 0.2834951  | 5.5767950 | -0.1813003 |
| N | -1.2514004 | 5.1152063 | 2.7975829  |
| H | -1.8723136 | 5.5040562 | 4.7688445  |
| H | -0.0862951 | 9.1573465 | 0.6820911  |
| N | -0.7550352 | 7.1627666 | 0.7190138  |
| H | -1.0083266 | 4.3527190 | 0.8576423  |

|   |            |           |            |
|---|------------|-----------|------------|
| C | -2.2934797 | 5.1851870 | 3.7925888  |
| C | -1.7272363 | 4.9701052 | 1.4342445  |
| C | -0.9962210 | 8.5612484 | 0.4599735  |
| H | -2.8392793 | 4.2142004 | 3.9601362  |
| C | -1.9309755 | 6.3170408 | 0.7111337  |
| H | -1.2914575 | 8.7908247 | -0.6025748 |
| H | -1.8037611 | 8.9409769 | 1.1201322  |
| H | -3.0533568 | 5.9411588 | 3.5030236  |
| H | -2.6912218 | 4.4016646 | 1.3823370  |
| H | -2.3270035 | 6.0989338 | -0.3227929 |
| H | -2.7400642 | 6.8763480 | 1.2293811  |

SCF energy GEOOPT = -519.4917522946 H

ZPE = 772.0 kJ/mol

FREEH energy = 807.98 kJ/mol

FREEH entropy = 0.47460 kJ/mol/K

Vibrational spectrum

| # mode | symmetry | wave number      | IR intensity | selection rules |
|--------|----------|------------------|--------------|-----------------|
| #      |          | cm <sup>-1</sup> | km/mol       | IR RAMAN        |
| 1      |          | -0.00            | 0.00000      | - -             |
| 2      |          | -0.00            | 0.00000      | - -             |
| 3      |          | -0.00            | 0.00000      | - -             |
| 4      |          | -0.00            | 0.00000      | - -             |
| 5      |          | -0.00            | 0.00000      | - -             |
| 6      |          | 0.00             | 0.00000      | - -             |
| 7      | a        | 64.50            | 0.05304      | YES YES         |
| 8      | a        | 64.84            | 0.05504      | YES YES         |
| 9      | a        | 75.22            | 0.97618      | YES YES         |
| 10     | a        | 167.73           | 0.71844      | YES YES         |
| 11     | a        | 168.08           | 0.70509      | YES YES         |
| 12     | a        | 205.47           | 1.36900      | YES YES         |
| 13     | a        | 206.16           | 1.30112      | YES YES         |
| 14     | a        | 208.60           | 0.12763      | YES YES         |
| 15     | a        | 232.19           | 1.13723      | YES YES         |
| 16     | a        | 233.01           | 1.13059      | YES YES         |
| 17     | a        | 256.51           | 0.06337      | YES YES         |
| 18     | a        | 317.91           | 2.91426      | YES YES         |
| 19     | a        | 328.16           | 1.71961      | YES YES         |

|    |   |         |          |     |     |    |   |         |           |     |     |
|----|---|---------|----------|-----|-----|----|---|---------|-----------|-----|-----|
| 20 | a | 328.63  | 1.73681  | YES | YES | 59 | a | 1347.39 | 28.09612  | YES | YES |
| 21 | a | 391.69  | 1.12683  | YES | YES | 60 | a | 1348.03 | 60.46562  | YES | YES |
| 22 | a | 420.93  | 0.01048  | YES | YES | 61 | a | 1348.86 | 58.42259  | YES | YES |
| 23 | a | 421.85  | 0.00566  | YES | YES | 62 | a | 1358.33 | 34.38991  | YES | YES |
| 24 | a | 447.37  | 0.88946  | YES | YES | 63 | a | 1358.85 | 35.23902  | YES | YES |
| 25 | a | 539.25  | 10.07590 | YES | YES | 64 | a | 1387.78 | 0.92038   | YES | YES |
| 26 | a | 540.40  | 10.00902 | YES | YES | 65 | a | 1388.13 | 0.85741   | YES | YES |
| 27 | a | 572.10  | 1.20947  | YES | YES | 66 | a | 1388.38 | 0.70625   | YES | YES |
| 28 | a | 743.01  | 7.69639  | YES | YES | 67 | a | 1406.22 | 9.64214   | YES | YES |
| 29 | a | 743.85  | 7.82828  | YES | YES | 68 | a | 1406.49 | 10.32572  | YES | YES |
| 30 | a | 746.81  | 11.54143 | YES | YES | 69 | a | 1411.35 | 39.28114  | YES | YES |
| 31 | a | 851.48  | 0.15648  | YES | YES | 70 | a | 1413.76 | 4.94850   | YES | YES |
| 32 | a | 872.48  | 7.01495  | YES | YES | 71 | a | 1414.32 | 5.21540   | YES | YES |
| 33 | a | 872.77  | 6.92744  | YES | YES | 72 | a | 1427.98 | 0.66014   | YES | YES |
| 34 | a | 964.55  | 16.89188 | YES | YES | 73 | a | 1432.99 | 5.76876   | YES | YES |
| 35 | a | 964.72  | 16.88924 | YES | YES | 74 | a | 1433.46 | 6.22710   | YES | YES |
| 36 | a | 980.44  | 2.83193  | YES | YES | 75 | a | 1434.94 | 3.70595   | YES | YES |
| 37 | a | 1014.51 | 0.00684  | YES | YES | 76 | a | 1440.71 | 15.33738  | YES | YES |
| 38 | a | 1036.11 | 38.95962 | YES | YES | 77 | a | 1441.06 | 15.23608  | YES | YES |
| 39 | a | 1036.50 | 39.73745 | YES | YES | 78 | a | 1448.79 | 4.35793   | YES | YES |
| 40 | a | 1048.36 | 1.52314  | YES | YES | 79 | a | 2776.24 | 102.17148 | YES | YES |
| 41 | a | 1072.35 | 15.03592 | YES | YES | 80 | a | 2776.36 | 101.62692 | YES | YES |
| 42 | a | 1072.76 | 14.78251 | YES | YES | 81 | a | 2776.77 | 110.85842 | YES | YES |
| 43 | a | 1099.90 | 2.16523  | YES | YES | 82 | a | 2800.39 | 315.37456 | YES | YES |
| 44 | a | 1100.07 | 2.41279  | YES | YES | 83 | a | 2800.55 | 314.26162 | YES | YES |
| 45 | a | 1100.74 | 27.35078 | YES | YES | 84 | a | 2803.82 | 2.22420   | YES | YES |
| 46 | a | 1141.72 | 27.37941 | YES | YES | 85 | a | 2868.51 | 110.83700 | YES | YES |
| 47 | a | 1157.86 | 49.99640 | YES | YES | 86 | a | 2869.10 | 110.13405 | YES | YES |
| 48 | a | 1158.04 | 49.68994 | YES | YES | 87 | a | 2872.52 | 128.88640 | YES | YES |
| 49 | a | 1228.27 | 5.93142  | YES | YES | 88 | a | 2973.10 | 7.76182   | YES | YES |
| 50 | a | 1228.41 | 6.36862  | YES | YES | 89 | a | 2973.21 | 6.81578   | YES | YES |
| 51 | a | 1241.31 | 1.11150  | YES | YES | 90 | a | 2974.42 | 2.09751   | YES | YES |
| 52 | a | 1262.75 | 37.15958 | YES | YES | 91 | a | 2976.30 | 9.67611   | YES | YES |
| 53 | a | 1263.08 | 37.00437 | YES | YES | 92 | a | 2976.50 | 9.03869   | YES | YES |
| 54 | a | 1275.78 | 0.43636  | YES | YES | 93 | a | 2977.41 | 109.40577 | YES | YES |
| 55 | a | 1300.26 | 7.28160  | YES | YES | 94 | a | 3002.60 | 21.36040  | YES | YES |
| 56 | a | 1310.02 | 9.90495  | YES | YES | 95 | a | 3003.30 | 21.29849  | YES | YES |
| 57 | a | 1310.69 | 9.29768  | YES | YES | 96 | a | 3012.34 | 68.61041  | YES | YES |
| 58 | a | 1339.34 | 9.69959  | YES | YES | 97 | a | 3030.88 | 8.87199   | YES | YES |

|    |   |         |          |     |     |
|----|---|---------|----------|-----|-----|
| 98 | a | 3031.47 | 35.14299 | YES | YES |
| 99 | a | 3031.72 | 36.55099 | YES | YES |

\$e

## S-5 Overview on crystal data

S-Table 4: Summary of crystallographic data for the molecular structures

| Compound                                        | Compound 1A                                                                               | Compound 1B                                                                                    | Compound 3                                                                                |
|-------------------------------------------------|-------------------------------------------------------------------------------------------|------------------------------------------------------------------------------------------------|-------------------------------------------------------------------------------------------|
| CCDC number                                     | 2193060                                                                                   | 2193049                                                                                        |                                                                                           |
| Empirical formula                               | C <sub>52.45</sub> H <sub>49.31</sub> Al <sub>4</sub> F <sub>38.14</sub> GaO <sub>4</sub> | C <sub>92</sub> H <sub>90</sub> Al <sub>8</sub> F <sub>72</sub> Ga <sub>2</sub> O <sub>8</sub> | C <sub>48.10</sub> H <sub>46.39</sub> Al <sub>4</sub> F <sub>36.73</sub> InO <sub>4</sub> |
| Formula weight                                  | 1645.91                                                                                   | 3046.75                                                                                        | 1609.11                                                                                   |
| Temperature [K]                                 | 120(2)                                                                                    | 100(2)                                                                                         | 100(2)                                                                                    |
| Crystal system                                  | triclinic                                                                                 | monoclinic                                                                                     | triclinic                                                                                 |
| Space group (number)                            | $P\bar{1}$ (2)                                                                            | $P2_1/c$ (14)                                                                                  | $P\bar{1}$ (2)                                                                            |
| <i>a</i> [Å]                                    | 16.445(6)                                                                                 | 44.352(11)                                                                                     | 22.327(6)                                                                                 |
| <i>b</i> [Å]                                    | 16.685(6)                                                                                 | 18.147(4)                                                                                      | 26.903(8)                                                                                 |
| <i>c</i> [Å]                                    | 28.346(9)                                                                                 | 30.839(7)                                                                                      | 29.692(9)                                                                                 |
| $\alpha$ [°]                                    | 80.473(15)                                                                                | 90                                                                                             | 88.983(7)                                                                                 |
| $\beta$ [°]                                     | 83.826(10)                                                                                | 102.490(9)                                                                                     | 70.929(9)                                                                                 |
| $\gamma$ [°]                                    | 60.715(9)                                                                                 | 90                                                                                             | 70.884(7)                                                                                 |
| Volume [Å <sup>3</sup> ]                        | 6687(4)                                                                                   | 24234(9)                                                                                       | 15847(8)                                                                                  |
| <i>Z</i>                                        | 4                                                                                         | 8                                                                                              | 10                                                                                        |
| $\rho_{\text{calc}}$ [gcm <sup>-3</sup> ]       | 1.635                                                                                     | 1.670                                                                                          | 1.686                                                                                     |
| $\mu$ [mm <sup>-1</sup> ]                       | 0.613                                                                                     | 0.664                                                                                          | 0.577                                                                                     |
| <i>F</i> (000)                                  | 3289                                                                                      | 12159                                                                                          | 7986                                                                                      |
| Crystal size [mm <sup>3</sup> ]                 | 0.151×0.101×0.039                                                                         | 0.399×0.202×0.074                                                                              | 0.256×0.109×0.098                                                                         |
| Crystal colour                                  | orange                                                                                    | yellow                                                                                         | yellow                                                                                    |
| Crystal shape                                   | plate                                                                                     | plate                                                                                          | plate                                                                                     |
| Radiation                                       | MoK $\alpha$ ( $\lambda=0.71073$ Å)                                                       | MoK $\alpha$ ( $\lambda=0.71073$ Å)                                                            | MoK $\alpha$ ( $\lambda=0.71073$ Å)                                                       |
| 2 $\theta$ range [°]                            | 2.82 to 56.01 (0.76 Å)                                                                    | 2.62 to 59.29 (0.72 Å)                                                                         | 2.87 to 61.23 (0.70 Å)                                                                    |
| Index ranges                                    | -21 ≤ <i>h</i> ≤ 21<br>-21 ≤ <i>k</i> ≤ 21<br>-37 ≤ <i>l</i> ≤ 37                         | -61 ≤ <i>h</i> ≤ 60<br>-23 ≤ <i>k</i> ≤ 25<br>-42 ≤ <i>l</i> ≤ 42                              | -31 ≤ <i>h</i> ≤ 31<br>-38 ≤ <i>k</i> ≤ 38<br>-42 ≤ <i>l</i> ≤ 42                         |
| Reflections collected                           | 335017                                                                                    | 525980                                                                                         | 891645                                                                                    |
| Independent reflections                         | 32094<br>$R_{\text{int}} = 0.0632$<br>$R_{\text{sigma}} = 0.0353$                         | 66650<br>$R_{\text{int}} = 0.0542$<br>$R_{\text{sigma}} = 0.0394$                              | 97222<br>$R_{\text{int}} = 0.0598$<br>$R_{\text{sigma}} = 0.0350$                         |
| Completeness<br>$\Theta = 25.242^\circ$         | to 100.0 %                                                                                | 100.0 %                                                                                        | 99.9 %                                                                                    |
| Data / Restraints / Parameters                  | 32094/71606/3886                                                                          | 66650/125086/4996                                                                              | 97222/352965/8649                                                                         |
| Goodness-of-fit on $F^2$                        | 1.025                                                                                     | 1.018                                                                                          | 1.025                                                                                     |
| Final <i>R</i> indexes<br>[ $\geq 2\sigma(I)$ ] | $R_1 = 0.0553$<br>$wR_2 = 0.1514$                                                         | $R_1 = 0.0415$<br>$wR_2 = 0.0942$                                                              | $R_1 = 0.0622$<br>$wR_2 = 0.1666$                                                         |
| Final <i>R</i> indexes<br>[all data]            | $R_1 = 0.0861$<br>$wR_2 = 0.1746$                                                         | $R_1 = 0.0727$<br>$wR_2 = 0.1072$                                                              | $R_1 = 0.0911$<br>$wR_2 = 0.1920$                                                         |
| Largest peak/hole [eÅ <sup>-3</sup> ]           | 1.21/-1.15                                                                                | 0.96/-0.88                                                                                     | 2.47/-1.36                                                                                |

S-Table 5: Summary of crystallographic data for the molecular structures

| Compound                                   | Compound 3                                                        | Compound 4                                                        | Compound 5                                                        |
|--------------------------------------------|-------------------------------------------------------------------|-------------------------------------------------------------------|-------------------------------------------------------------------|
| CCDC number                                |                                                                   | 2193851                                                           | 2194404                                                           |
| Empirical formula                          | $C_{48.13}H_{46.42}Al_4F_{36.71}O_4Ti$                            | $C_{55}H_{66}Al_5F_{36}N_3O_4$                                    | $C_{56.88}H_{67.67}Al_4F_{36.06}GaN_3O_{3.97}$                    |
| Formula weight                             | 1698.63                                                           | 1652.00                                                           | 1719.55                                                           |
| Temperature [K]                            | 100(2)                                                            | 100(2)                                                            | 100(2)                                                            |
| Crystal system                             | triclinic                                                         | monoclinic                                                        | triclinic                                                         |
| Space group (number)                       | $P\bar{1}$ (2)                                                    | $P2_1/c$ (14)                                                     | $P\bar{1}$ (2)                                                    |
| <i>a</i> [Å]                               | 22.345(17)                                                        | 21.369(8)                                                         | 10.927(6)                                                         |
| <i>b</i> [Å]                               | 26.95(3)                                                          | 17.024(3)                                                         | 17.637(11)                                                        |
| <i>c</i> [Å]                               | 29.77(2)                                                          | 21.581(7)                                                         | 19.087(10)                                                        |
| $\alpha$ [°]                               | 88.88(3)                                                          | 90                                                                | 94.601(14)                                                        |
| $\beta$ [°]                                | 70.81(5)                                                          | 116.118(16)                                                       | 97.945(15)                                                        |
| $\gamma$ [°]                               | 70.94(5)                                                          | 90                                                                | 98.66(3)                                                          |
| Volume [Å <sup>3</sup> ]                   | 15925(24)                                                         | 7049(4)                                                           | 3582(4)                                                           |
| <i>Z</i>                                   | 10                                                                | 4                                                                 | 2                                                                 |
| $\rho_{\text{calc}}$ [gcm <sup>-3</sup> ]  | 1.771                                                             | 1.557                                                             | 1.594                                                             |
| $\mu$ [mm <sup>-1</sup> ]                  | 2.739                                                             | 0.219                                                             | 0.573                                                             |
| <i>F</i> (000)                             | 8306                                                              | 3352                                                              | 1738                                                              |
| Crystal size [mm <sup>3</sup> ]            | 0.232×0.198×0.156                                                 | 0.412×0.244×0.108                                                 | 0.426×0.170×0.056                                                 |
| Crystal colour                             | yellow                                                            | yellow                                                            | yellow                                                            |
| Crystal shape                              | block                                                             | block                                                             | plate                                                             |
| Radiation                                  | MoK $\alpha$ ( $\lambda=0.71073$ Å)                               | MoK $\alpha$ ( $\lambda=0.71073$ Å)                               | MoK $\alpha$ ( $\lambda=0.71073$ Å)                               |
| 2 $\theta$ range [°]                       | 1.46 to 55.06 (0.77 Å)                                            | 3.18 to 55.13 (0.77 Å)                                            | 2.17 to 56.72 (0.75 Å)                                            |
| Index ranges                               | -29 ≤ <i>h</i> ≤ 29<br>-34 ≤ <i>k</i> ≤ 35<br>-38 ≤ <i>l</i> ≤ 38 | -27 ≤ <i>h</i> ≤ 27<br>-22 ≤ <i>k</i> ≤ 22<br>-28 ≤ <i>l</i> ≤ 28 | -14 ≤ <i>h</i> ≤ 14<br>-23 ≤ <i>k</i> ≤ 23<br>-25 ≤ <i>l</i> ≤ 25 |
| Reflections collected                      | 299768                                                            | 179713                                                            | 70915                                                             |
| Independent reflections                    | 73155<br>$R_{\text{int}} = 0.0682$<br>$R_{\text{sigma}} = 0.0706$ | 16215<br>$R_{\text{int}} = 0.0522$<br>$R_{\text{sigma}} = 0.0223$ | 17881<br>$R_{\text{int}} = 0.0442$<br>$R_{\text{sigma}} = 0.0452$ |
| Completeness<br>$\Theta = 25.242^\circ$    | to 100.0 %                                                        | 99.9 %                                                            | 100.0 %                                                           |
| Data / Restraints / Parameters             | 73155/322897/8254                                                 | 16215/4026/946                                                    | 17881/13768/1616                                                  |
| Goodness-of-fit on $F^2$                   | 1.031                                                             | 1.026                                                             | 1.052                                                             |
| Final $R$ indexes<br>[ $\geq 2\sigma(I)$ ] | $R_1 = 0.0583$<br>$wR_2 = 0.1410$                                 | $R_1 = 0.0357$<br>$wR_2 = 0.0841$                                 | $R_1 = 0.0609$<br>$wR_2 = 0.1469$                                 |
| Final $R$ indexes<br>[all data]            | $R_1 = 0.1018$<br>$wR_2 = 0.1631$                                 | $R_1 = 0.0523$<br>$wR_2 = 0.0940$                                 | $R_1 = 0.0869$<br>$wR_2 = 0.1617$                                 |
| Largest peak/hole [eÅ <sup>-3</sup> ]      | 3.60/-1.51                                                        | 0.37/-0.32                                                        | 1.30/-0.59                                                        |

S-Table 6: Summary of crystallographic data for the molecular structures

|                                           |                                     |        |   |   |        |
|-------------------------------------------|-------------------------------------|--------|---|---|--------|
| Compound                                  | Compound 6                          |        |   |   |        |
| CCDC number                               | 2194403                             |        |   |   |        |
| Empirical formula                         | $C_{55}H_{66}Al_4F_{36}GaN_3O_4$    |        |   |   |        |
| Formula weight                            | 1694.57                             |        |   |   |        |
| Temperature [K]                           | 100(2)                              |        |   |   |        |
| Crystal system                            | triclinic                           |        |   |   |        |
| Space group (number)                      | $P\bar{1}$ (2)                      |        |   |   |        |
| $a$ [Å]                                   | 17.181(7)                           |        |   |   |        |
| $b$ [Å]                                   | 21.399(6)                           |        |   |   |        |
| $c$ [Å]                                   | 21.691(5)                           |        |   |   |        |
| $\alpha$ [°]                              | 117.464(12)                         |        |   |   |        |
| $\beta$ [°]                               | 90.245(14)                          |        |   |   |        |
| $\gamma$ [°]                              | 90.863(16)                          |        |   |   |        |
| Volume [Å <sup>3</sup> ]                  | 7075(4)                             |        |   |   |        |
| $Z$                                       | 4                                   |        |   |   |        |
| $\rho_{\text{calc}}$ [gcm <sup>-3</sup> ] | 1.591                               |        |   |   |        |
| $\mu$ [mm <sup>-1</sup> ]                 | 0.579                               |        |   |   |        |
| $F(000)$                                  | 3424                                |        |   |   |        |
| Crystal size [mm <sup>3</sup> ]           | 0.180×0.127×0.126                   |        |   |   |        |
| Crystal colour                            | yellow                              |        |   |   |        |
| Crystal shape                             | block                               |        |   |   |        |
| Radiation                                 | MoK $\alpha$ ( $\lambda=0.71073$ Å) |        |   |   |        |
| 2 $\theta$ range [°]                      | 3.16 to 52.87 (0.80 Å)              |        |   |   |        |
| Index ranges                              | -21                                 | ≤      | h | ≤ | 21     |
|                                           | -26                                 | ≤      | k | ≤ | 23     |
|                                           | 0 ≤ l ≤ 27                          |        |   |   |        |
| Reflections collected                     | 28962                               |        |   |   |        |
| Independent reflections                   | 28962                               | =      |   |   | 0.0372 |
|                                           | $R_{\text{int}} = 0.0802$           |        |   |   |        |
| Completeness                              | to                                  | 96.3 % |   |   |        |
| $\Theta = 25.242^\circ$                   |                                     |        |   |   |        |
| Data / Restraints / Parameters            | 28962/39668/2783                    |        |   |   |        |
| Goodness-of-fit on $F^2$                  | 1.051                               |        |   |   |        |
| Final $R$ indexes [ $\geq 2\sigma(I)$ ]   | $R_1$                               | =      |   |   | 0.0743 |
|                                           | $wR_2 = 0.1716$                     |        |   |   |        |
| Final $R$ indexes [all data]              | $R_1$                               | =      |   |   | 0.1249 |
|                                           | $wR_2 = 0.2022$                     |        |   |   |        |
| Largest peak/hole [eÅ <sup>-3</sup> ]     | 1.05/-0.72                          |        |   |   |        |

## Pictures of the asymmetric units

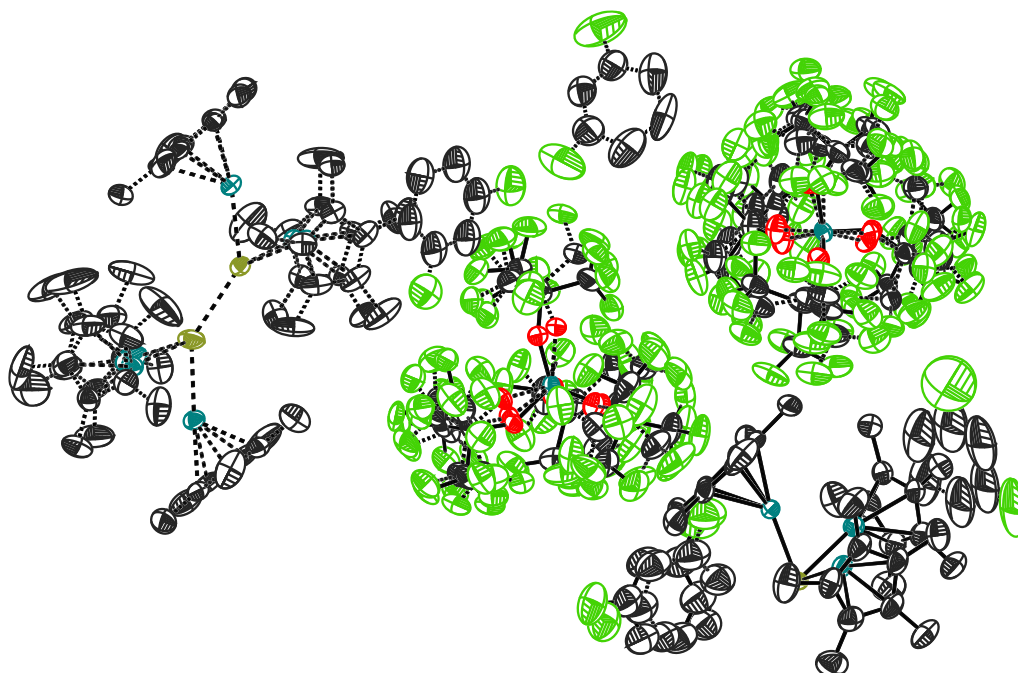

S-Figure 69: Asymmetric unit of the molecular structure of compound 1A. Hydrogen atoms were omitted for clarity. Thermal displacement of the ellipsoids was set at 50 % probability.

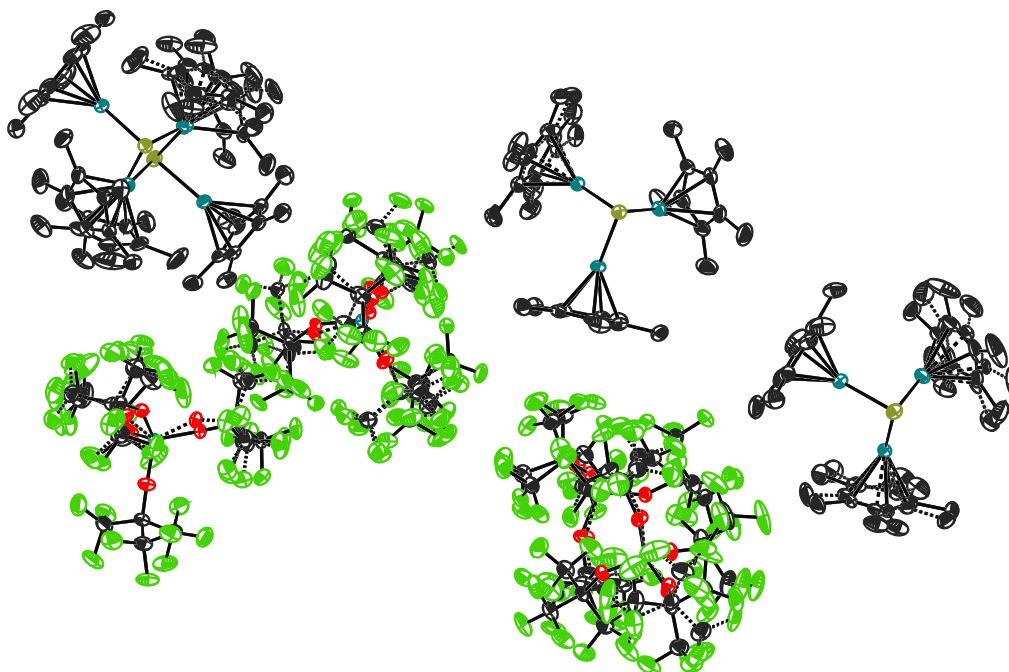

S-Figure 70: Asymmetric unit of the molecular structure of compound 1B. Hydrogen atoms were omitted for clarity. Thermal displacement of the ellipsoids was set at 50 % probability.

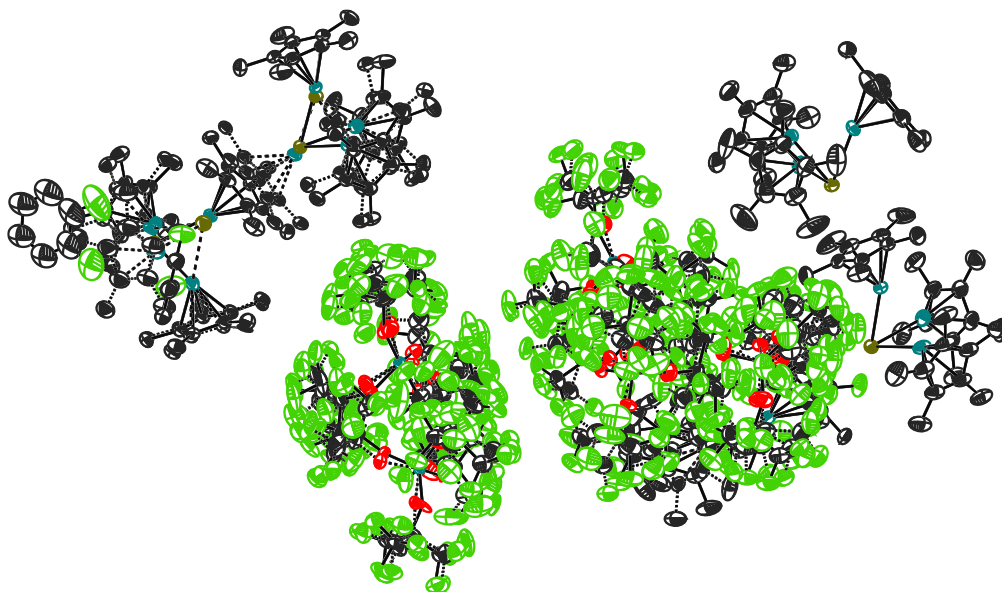

S-Figure 71: Asymmetric unit of the molecular structure of compound 2. Hydrogen atoms were omitted for clarity. Thermal displacement of the ellipsoids was set at 50 % probability.

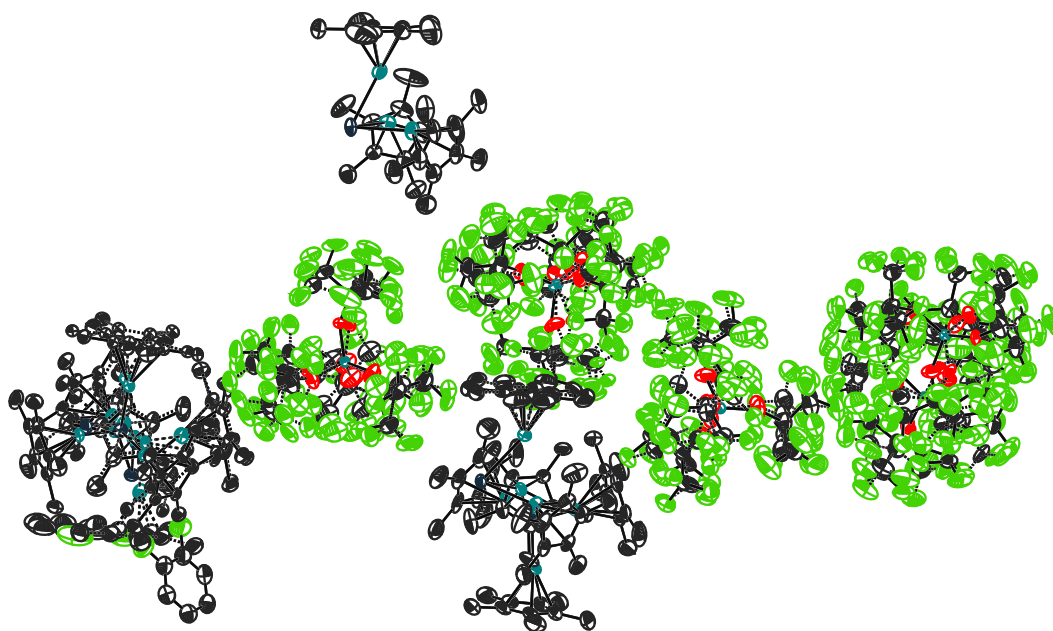

S-Figure 72: Asymmetric unit of the molecular structure of compound 3. Hydrogen atoms were omitted for clarity. Thermal displacement of the ellipsoids was set at 50 % probability.



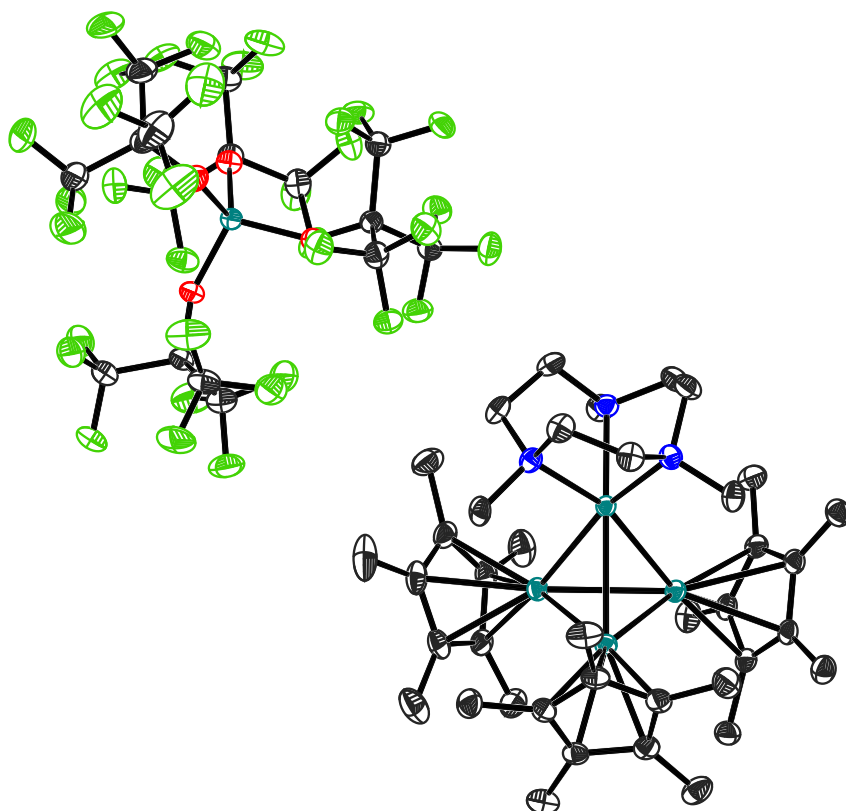

S-Figure 73: Asymmetric unit of the molecular structure of compound 4. Hydrogen atoms were omitted for clarity. Thermal displacement of the ellipsoids was set at 50 % probability.

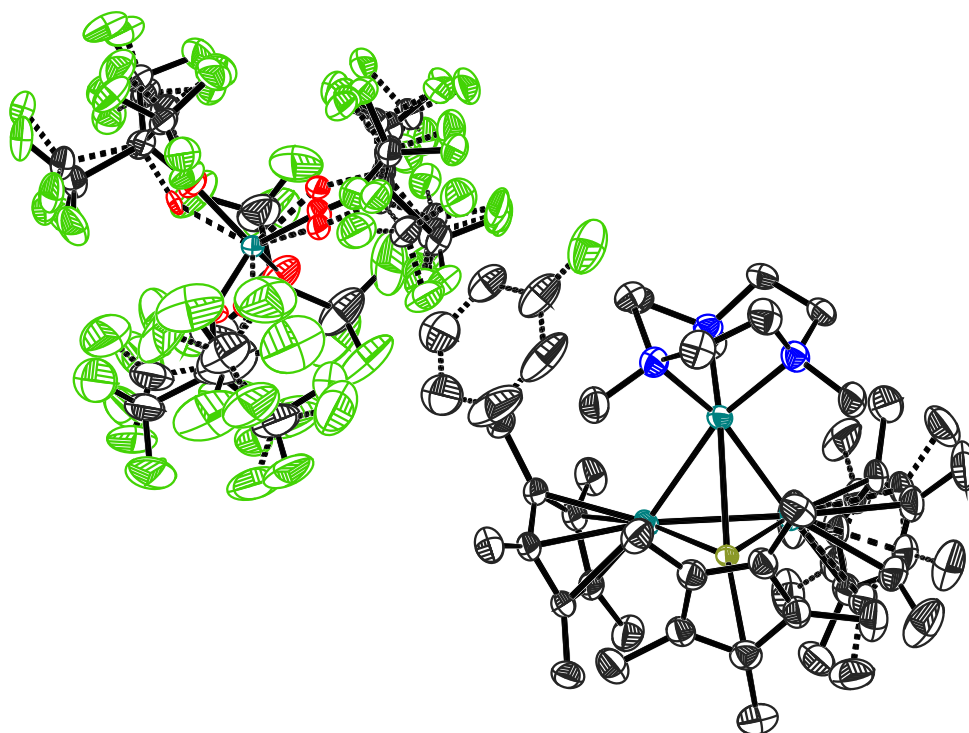

S-Figure 74: Asymmetric unit of the molecular structure of compound 5. Hydrogen atoms were omitted for clarity. Thermal displacement of the ellipsoids was set at 50 % probability.

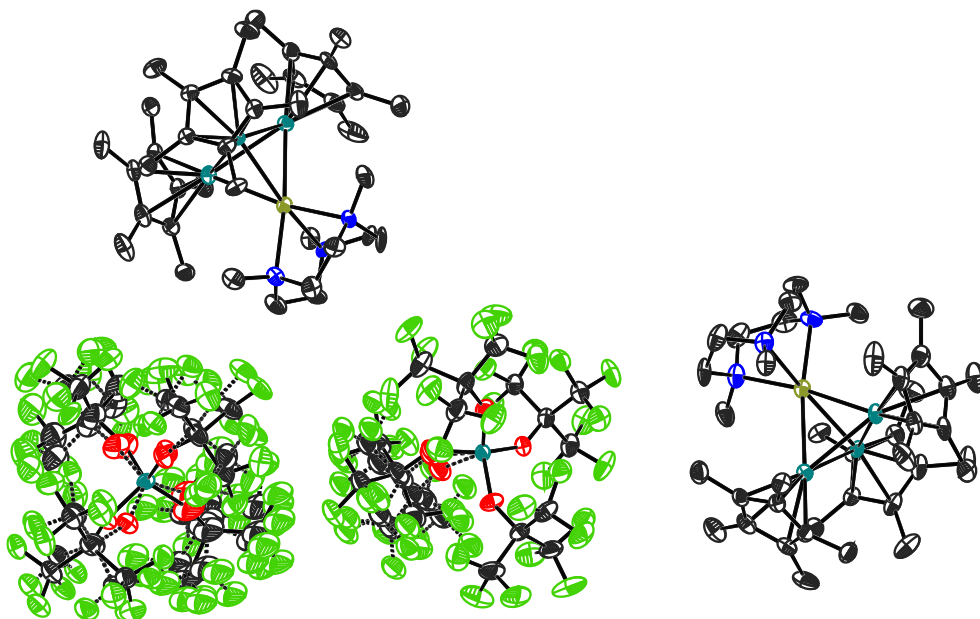

S-Figure 75: Asymmetric unit of the molecular structure of compound 6. Hydrogen atoms were omitted for clarity. Thermal displacement of the ellipsoids was set at 50 % probability.

## Tables of bond distances and angles

S-Table 7 Bond lengths and angles for **1A**

| Atom–Atom             | Length [Å] |            |           |
|-----------------------|------------|------------|-----------|
| Ga3–Al6               | 2.498(5)   | Al10–C1_20 | 2.267(14) |
| Ga3–Al7               | 2.508(7)   | Al11–C2_22 | 2.146(16) |
| Ga3–Al8               | 2.509(9)   | Al11–C3_22 | 2.20(2)   |
| Ga3–Ga2               | 2.7893(14) | Al11–C1_22 | 2.233(17) |
| Al6–C4_19             | 2.168(14)  | Al11–C4_22 | 2.31(2)   |
| Al6–C3_19             | 2.188(11)  | Al11–C5_22 | 2.347(19) |
| Al6–C5_19             | 2.207(12)  | Al4–O1_33  | 1.63(2)   |
| Al6–C1_19             | 2.221(11)  | Al4–O1_14  | 1.63(2)   |
| Al6–C2_19             | 2.221(10)  | Al4–O1_26  | 1.64(3)   |
| Al7–C2_21             | 2.132(14)  | Al4–O1_35  | 1.70(2)   |
| Al7–C1_21             | 2.193(13)  | Al4–O1_8   | 1.706(4)  |
| Al7–C3_21             | 2.223(16)  | Al4–O1_15  | 1.71(2)   |
| Al7–C5_21             | 2.261(15)  | Al4–O1_36  | 1.72(3)   |
| Al7–C4_21             | 2.275(17)  | Al4–O1_7   | 1.728(9)  |
| Al8–C1_23             | 2.082(18)  | Al4–O1_5   | 1.728(2)  |
| Al8–C5_23             | 2.15(2)    | Al4–O1_6   | 1.747(7)  |
| Al8–C2_23             | 2.214(16)  | Al4–O1_17  | 1.77(2)   |
| Al8–C4_23             | 2.26(2)    | Al5–O1_10  | 1.619(16) |
| Al8–C3_23             | 2.310(17)  | Al5–O1_13  | 1.654(13) |
| Ga1–Al3               | 2.5152(12) | Al5–O1_2   | 1.663(4)  |
| Ga1–Al1               | 2.5159(13) | Al5–O1_11  | 1.708(6)  |
| Ga1–Al2               | 2.5294(12) | Al5–O1_32  | 1.72(3)   |
| Ga1–Ga1 <sup>#1</sup> | 2.8599(9)  | Al5–O1_3   | 1.740(8)  |
| Al1–C2_28             | 2.193(3)   | Al5–O1_1   | 1.769(6)  |
| Al1–C1_28             | 2.201(3)   | Al5–O1_4   | 1.776(10) |
| Al1–C3_28             | 2.208(4)   | Al5–O1_12  | 1.846(7)  |
| Al1–C4_28             | 2.225(4)   | O1_1–C1_1  | 1.356(7)  |
| Al1–C5_28             | 2.227(3)   | C1_1–C3_1  | 1.536(8)  |
| Al2–C4_27             | 2.210(3)   | C1_1–C4_1  | 1.557(8)  |
| Al2–C1_27             | 2.212(3)   | C1_1–C2_1  | 1.564(8)  |
| Al2–C5_27             | 2.212(3)   | C2_1–F1_1  | 1.324(8)  |
| Al2–C2_27             | 2.216(3)   | C2_1–F2_1  | 1.331(8)  |
| Al2–C3_27             | 2.222(4)   | C2_1–F3_1  | 1.343(8)  |
| Al3–C4_24             | 2.199(3)   | C3_1–F6_1  | 1.311(8)  |
| Al3–C5_24             | 2.201(3)   | C3_1–F5_1  | 1.346(7)  |
| Al3–C3_24             | 2.220(3)   | C3_1–F4_1  | 1.349(9)  |
| Al3–C2_24             | 2.223(3)   | C4_1–F9_1  | 1.322(8)  |
| Al3–C1_24             | 2.231(3)   | C4_1–F7_1  | 1.336(8)  |
| Ga2–Al10              | 2.506(7)   | C4_1–F8_1  | 1.342(8)  |
| Ga2–Al11              | 2.522(9)   | O1_2–C1_2  | 1.346(7)  |
| Ga2–Al9               | 2.524(2)   | C1_2–C4_2  | 1.552(8)  |
| Al9–C1_18             | 2.200(6)   | C1_2–C3_2  | 1.553(7)  |
| Al9–C2_18             | 2.213(6)   | C1_2–C2_2  | 1.558(8)  |
| Al9–C5_18             | 2.225(7)   | C2_2–F3_2  | 1.316(8)  |
| Al9–C3_18             | 2.225(9)   | C2_2–F2_2  | 1.336(7)  |
| Al9–C4_18             | 2.237(9)   | C2_2–F1_2  | 1.338(7)  |
| Al10–C3_20            | 2.157(17)  | C3_2–F4_2  | 1.321(7)  |
| Al10–C4_20            | 2.173(13)  | C3_2–F5_2  | 1.331(7)  |
| Al10–C2_20            | 2.193(15)  | C3_2–F6_2  | 1.335(7)  |
| Al10–C5_20            | 2.244(13)  | C4_2–F9_2  | 1.330(9)  |
|                       |            | C4_2–F8_2  | 1.332(8)  |
|                       |            | C4_2–F7_2  | 1.334(9)  |
|                       |            | O1_3–C1_3  | 1.353(7)  |
|                       |            | C1_3–C3_3  | 1.530(7)  |
|                       |            | C1_3–C2_3  | 1.556(8)  |

|           |          |             |           |
|-----------|----------|-------------|-----------|
| C1_3-C4_3 | 1.557(8) | C2_7-F2_7   | 1.340(7)  |
| C2_3-F3_3 | 1.330(8) | C3_7-F4_7   | 1.328(8)  |
| C2_3-F1_3 | 1.332(8) | C3_7-F5_7   | 1.336(7)  |
| C2_3-F2_3 | 1.339(7) | C3_7-F6_7   | 1.342(7)  |
| C3_3-F4_3 | 1.334(6) | C4_7-F7_7   | 1.328(7)  |
| C3_3-F6_3 | 1.335(7) | C4_7-F9_7   | 1.336(7)  |
| C3_3-F5_3 | 1.359(8) | C4_7-F8_7   | 1.340(7)  |
| C4_3-F9_3 | 1.306(7) | O1_8-C1_8   | 1.348(5)  |
| C4_3-F8_3 | 1.329(6) | C1_8-C3_8   | 1.527(5)  |
| C4_3-F7_3 | 1.366(8) | C1_8-C4_8   | 1.529(6)  |
| O1_4-C1_4 | 1.348(8) | C1_8-C2_8   | 1.554(6)  |
| C1_4-C3_4 | 1.549(7) | C2_8-F3_8   | 1.309(6)  |
| C1_4-C2_4 | 1.553(8) | C2_8-F1_8   | 1.337(5)  |
| C1_4-C4_4 | 1.555(8) | C2_8-F2_8   | 1.344(5)  |
| C2_4-F1_4 | 1.327(7) | C3_8-F6_8   | 1.337(5)  |
| C2_4-F3_4 | 1.329(7) | C3_8-F5_8   | 1.342(6)  |
| C2_4-F2_4 | 1.335(6) | C3_8-F4_8   | 1.354(6)  |
| C3_4-F4_4 | 1.316(7) | C4_8-F9_8   | 1.320(5)  |
| C3_4-F5_4 | 1.336(8) | C4_8-F8_8   | 1.327(5)  |
| C3_4-F6_4 | 1.336(6) | C4_8-F7_8   | 1.403(6)  |
| C4_4-F7_4 | 1.322(8) | O1_10-C1_10 | 1.352(12) |
| C4_4-F9_4 | 1.325(8) | C1_10-C3_10 | 1.531(11) |
| C4_4-F8_4 | 1.341(8) | C1_10-C2_10 | 1.543(10) |
| O1_5-C1_5 | 1.356(4) | C1_10-C4_10 | 1.554(10) |
| C1_5-C2_5 | 1.543(5) | C2_10-F3_10 | 1.318(10) |
| C1_5-C3_5 | 1.551(5) | C2_10-F1_10 | 1.332(11) |
| C1_5-C4_5 | 1.553(5) | C2_10-F2_10 | 1.340(8)  |
| C2_5-F3_5 | 1.298(5) | C3_10-F5_10 | 1.330(11) |
| C2_5-F1_5 | 1.352(5) | C3_10-F6_10 | 1.331(11) |
| C2_5-F2_5 | 1.352(4) | C3_10-F4_10 | 1.333(11) |
| C3_5-F5_5 | 1.325(5) | C4_10-F8_10 | 1.321(10) |
| C3_5-F4_5 | 1.328(4) | C4_10-F9_10 | 1.325(10) |
| C3_5-F6_5 | 1.339(4) | C4_10-F7_10 | 1.345(10) |
| C4_5-F7_5 | 1.328(5) | O1_11-C1_11 | 1.363(11) |
| C4_5-F8_5 | 1.331(4) | C1_11-C4_11 | 1.540(11) |
| C4_5-F9_5 | 1.337(5) | C1_11-C2_11 | 1.542(11) |
| O1_6-C1_6 | 1.351(5) | C1_11-C3_11 | 1.555(11) |
| C1_6-C2_6 | 1.545(6) | C2_11-F3_11 | 1.324(10) |
| C1_6-C3_6 | 1.549(6) | C2_11-F1_11 | 1.332(11) |
| C1_6-C4_6 | 1.557(6) | C2_11-F2_11 | 1.340(10) |
| C2_6-F1_6 | 1.324(5) | C3_11-F6_11 | 1.322(11) |
| C2_6-F2_6 | 1.335(7) | C3_11-F4_11 | 1.340(12) |
| C2_6-F3_6 | 1.350(6) | C3_11-F5_11 | 1.346(11) |
| C3_6-F4_6 | 1.325(6) | C4_11-F8_11 | 1.329(10) |
| C3_6-F5_6 | 1.335(6) | C4_11-F9_11 | 1.334(10) |
| C3_6-F6_6 | 1.357(7) | C4_11-F7_11 | 1.354(10) |
| C4_6-F7_6 | 1.327(5) | O1_12-C1_12 | 1.350(11) |
| C4_6-F9_6 | 1.327(6) | C1_12-C4_12 | 1.545(11) |
| C4_6-F8_6 | 1.353(6) | C1_12-C3_12 | 1.551(11) |
| O1_7-C1_7 | 1.348(7) | C1_12-C2_12 | 1.554(11) |
| C1_7-C2_7 | 1.551(7) | C2_12-F3_12 | 1.324(10) |
| C1_7-C4_7 | 1.551(7) | C2_12-F2_12 | 1.328(10) |
| C1_7-C3_7 | 1.560(7) | C2_12-F1_12 | 1.335(10) |
| C2_7-F3_7 | 1.330(7) | C3_12-F5_12 | 1.325(12) |
| C2_7-F1_7 | 1.332(7) | C3_12-F6_12 | 1.325(12) |

|              |           |                |           |
|--------------|-----------|----------------|-----------|
| C3_12-F4_12  | 1.329(12) | C6_18-H6C_18   | 0.9800    |
| C4_12-F9_12  | 1.322(12) | C7_18-H7A_18   | 0.9800    |
| C4_12-F7_12  | 1.339(11) | C7_18-H7B_18   | 0.9800    |
| C4_12-F8_12  | 1.343(11) | C7_18-H7C_18   | 0.9800    |
| O1_13-C1_13  | 1.356(11) | C8_18-H8A_18   | 0.9800    |
| C1_13-C3_13  | 1.541(10) | C8_18-H8B_18   | 0.9800    |
| C1_13-C2_13  | 1.545(11) | C8_18-H8C_18   | 0.9800    |
| C1_13-C4_13  | 1.554(10) | C9_18-H9A_18   | 0.9800    |
| C2_13-F1_13  | 1.325(11) | C9_18-H9B_18   | 0.9800    |
| C2_13-F3_13  | 1.327(10) | C9_18-H9C_18   | 0.9800    |
| C2_13-F2_13  | 1.339(10) | C10_18-H10A_18 | 0.9800    |
| C3_13-F4_13  | 1.330(10) | C10_18-H10B_18 | 0.9800    |
| C3_13-F6_13  | 1.344(9)  | C10_18-H10C_18 | 0.9800    |
| C3_13-F5_13  | 1.352(11) | C1_19-C2_19    | 1.416(10) |
| C4_13-F9_13  | 1.317(10) | C1_19-C5_19    | 1.421(10) |
| C4_13-F8_13  | 1.319(9)  | C1_19-C10_19   | 1.512(10) |
| C4_13-F7_13  | 1.344(10) | C2_19-C3_19    | 1.422(9)  |
| O1_14-C1_14  | 1.353(13) | C2_19-C9_19    | 1.498(10) |
| C1_14-C2_14  | 1.544(12) | C3_19-C4_19    | 1.434(9)  |
| C1_14-C4_14  | 1.552(12) | C3_19-C8_19    | 1.502(10) |
| C1_14-C3_14  | 1.560(12) | C4_19-C5_19    | 1.425(10) |
| C2_14-F1_14  | 1.328(12) | C4_19-C7_19    | 1.515(10) |
| C2_14-F3_14  | 1.330(13) | C5_19-C6_19    | 1.517(10) |
| C2_14-F2_14  | 1.340(13) | C6_19-H6A_19   | 0.9800    |
| C3_14-F6_14  | 1.328(13) | C6_19-H6B_19   | 0.9800    |
| C3_14-F4_14  | 1.332(12) | C6_19-H6C_19   | 0.9800    |
| C3_14-F5_14  | 1.341(12) | C7_19-H7A_19   | 0.9800    |
| C4_14-F7_14  | 1.329(12) | C7_19-H7B_19   | 0.9800    |
| C4_14-F9_14  | 1.332(12) | C7_19-H7C_19   | 0.9800    |
| C4_14-F8_14  | 1.335(13) | C8_19-H8A_19   | 0.9800    |
| O1_15-C1_15  | 1.355(13) | C8_19-H8B_19   | 0.9800    |
| C1_15-C3_15  | 1.545(12) | C8_19-H8C_19   | 0.9800    |
| C1_15-C2_15  | 1.551(12) | C9_19-H9A_19   | 0.9800    |
| C1_15-C4_15  | 1.563(12) | C9_19-H9B_19   | 0.9800    |
| C2_15-F2_15  | 1.339(13) | C9_19-H9C_19   | 0.9800    |
| C2_15-F3_15  | 1.343(13) | C10_19-H10A_19 | 0.9800    |
| C2_15-F1_15  | 1.344(13) | C10_19-H10B_19 | 0.9800    |
| C3_15-F5_15  | 1.333(12) | C10_19-H10C_19 | 0.9800    |
| C3_15-F4_15  | 1.335(12) | C1_20-C2_20    | 1.400(11) |
| C3_15-F6_15  | 1.346(13) | C1_20-C5_20    | 1.430(10) |
| C4_15-F8_15  | 1.323(12) | C1_20-C10_20   | 1.489(11) |
| C4_15-F9_15  | 1.327(12) | C2_20-C3_20    | 1.440(10) |
| C4_15-F7_15  | 1.344(12) | C2_20-C9_20    | 1.505(10) |
| C1_18-C5_18  | 1.414(9)  | C3_20-C4_20    | 1.424(9)  |
| C1_18-C2_18  | 1.429(8)  | C3_20-C8_20    | 1.479(10) |
| C1_18-C10_18 | 1.484(9)  | C4_20-C5_20    | 1.400(9)  |
| C2_18-C3_18  | 1.423(9)  | C4_20-C7_20    | 1.497(9)  |
| C2_18-C9_18  | 1.493(9)  | C5_20-C6_20    | 1.501(9)  |
| C3_18-C4_18  | 1.421(9)  | C6_20-H6A_20   | 0.9800    |
| C3_18-C8_18  | 1.498(10) | C6_20-H6B_20   | 0.9800    |
| C4_18-C5_18  | 1.414(10) | C6_20-H6C_20   | 0.9800    |
| C4_18-C7_18  | 1.507(10) | C7_20-H7A_20   | 0.9800    |
| C5_18-C6_18  | 1.516(9)  | C7_20-H7B_20   | 0.9800    |
| C6_18-H6A_18 | 0.9800    | C7_20-H7C_20   | 0.9800    |
| C6_18-H6B_18 | 0.9800    | C8_20-H8A_20   | 0.9800    |

|                |           |                |           |
|----------------|-----------|----------------|-----------|
| C8_20-H8B_20   | 0.9800    | C10_22-H10A_22 | 0.9800    |
| C8_20-H8C_20   | 0.9800    | C10_22-H10B_22 | 0.9800    |
| C9_20-H9A_20   | 0.9800    | C10_22-H10C_22 | 0.9800    |
| C9_20-H9B_20   | 0.9800    | C1_23-C2_23    | 1.407(9)  |
| C9_20-H9C_20   | 0.9800    | C1_23-C5_23    | 1.423(10) |
| C10_20-H10A_20 | 0.9800    | C1_23-C10_23   | 1.501(10) |
| C10_20-H10B_20 | 0.9800    | C2_23-C3_23    | 1.418(10) |
| C10_20-H10C_20 | 0.9800    | C2_23-C9_23    | 1.515(10) |
| C1_21-C5_21    | 1.403(11) | C3_23-C4_23    | 1.423(10) |
| C1_21-C2_21    | 1.435(10) | C3_23-C8_23    | 1.498(10) |
| C1_21-C10_21   | 1.510(11) | C4_23-C5_23    | 1.408(10) |
| C2_21-C3_21    | 1.406(9)  | C4_23-C7_23    | 1.512(10) |
| C2_21-C9_21    | 1.474(10) | C5_23-C6_23    | 1.516(11) |
| C3_21-C4_21    | 1.413(10) | C6_23-H6A_23   | 0.9800    |
| C3_21-C8_21    | 1.509(10) | C6_23-H6B_23   | 0.9800    |
| C4_21-C5_21    | 1.417(11) | C6_23-H6C_23   | 0.9800    |
| C4_21-C7_21    | 1.480(11) | C7_23-H7A_23   | 0.9800    |
| C5_21-C6_21    | 1.510(11) | C7_23-H7B_23   | 0.9800    |
| C6_21-H6A_21   | 0.9800    | C7_23-H7C_23   | 0.9800    |
| C6_21-H6B_21   | 0.9800    | C8_23-H8A_23   | 0.9800    |
| C6_21-H6C_21   | 0.9800    | C8_23-H8B_23   | 0.9800    |
| C7_21-H7A_21   | 0.9800    | C8_23-H8C_23   | 0.9800    |
| C7_21-H7B_21   | 0.9800    | C9_23-H9A_23   | 0.9800    |
| C7_21-H7C_21   | 0.9800    | C9_23-H9B_23   | 0.9800    |
| C8_21-H8A_21   | 0.9800    | C9_23-H9C_23   | 0.9800    |
| C8_21-H8B_21   | 0.9800    | C10_23-H10A_23 | 0.9800    |
| C8_21-H8C_21   | 0.9800    | C10_23-H10B_23 | 0.9800    |
| C9_21-H9A_21   | 0.9800    | C10_23-H10C_23 | 0.9800    |
| C9_21-H9B_21   | 0.9800    | O1_17-C1_17    | 1.361(13) |
| C9_21-H9C_21   | 0.9800    | C1_17-C3_17    | 1.533(12) |
| C10_21-H10A_21 | 0.9800    | C1_17-C4_17    | 1.545(12) |
| C10_21-H10B_21 | 0.9800    | C1_17-C2_17    | 1.552(12) |
| C10_21-H10C_21 | 0.9800    | C2_17-F3_17    | 1.324(13) |
| C1_22-C5_22    | 1.414(10) | C2_17-F2_17    | 1.350(13) |
| C1_22-C2_22    | 1.420(10) | C2_17-F1_17    | 1.360(13) |
| C1_22-C10_22   | 1.510(10) | C3_17-F4_17    | 1.333(13) |
| C2_22-C3_22    | 1.422(9)  | C3_17-F6_17    | 1.345(13) |
| C2_22-C9_22    | 1.506(10) | C3_17-F5_17    | 1.379(13) |
| C3_22-C4_22    | 1.414(10) | C4_17-F8_17    | 1.329(13) |
| C3_22-C8_22    | 1.508(10) | C4_17-F9_17    | 1.336(13) |
| C4_22-C5_22    | 1.417(10) | C4_17-F7_17    | 1.348(13) |
| C4_22-C7_22    | 1.514(10) | O1_26-C1_26    | 1.348(14) |
| C5_22-C6_22    | 1.498(11) | C1_26-C4_26    | 1.537(13) |
| C6_22-H6A_22   | 0.9800    | C1_26-C2_26    | 1.547(13) |
| C6_22-H6B_22   | 0.9800    | C1_26-C3_26    | 1.563(13) |
| C6_22-H6C_22   | 0.9800    | C2_26-F1_26    | 1.326(14) |
| C7_22-H7A_22   | 0.9800    | C2_26-F2_26    | 1.330(14) |
| C7_22-H7B_22   | 0.9800    | C2_26-F3_26    | 1.351(14) |
| C7_22-H7C_22   | 0.9800    | C3_26-F6_26    | 1.337(14) |
| C8_22-H8A_22   | 0.9800    | C3_26-F4_26    | 1.338(14) |
| C8_22-H8B_22   | 0.9800    | C3_26-F5_26    | 1.346(14) |
| C8_22-H8C_22   | 0.9800    | C4_26-F9_26    | 1.329(14) |
| C9_22-H9A_22   | 0.9800    | C4_26-F8_26    | 1.337(14) |
| C9_22-H9B_22   | 0.9800    | C4_26-F7_26    | 1.346(14) |
| C9_22-H9C_22   | 0.9800    | C1_24-C2_24    | 1.410(4)  |

|                |          |                |           |
|----------------|----------|----------------|-----------|
| C1_24-C5_24    | 1.427(4) | C3_28-C8_28    | 1.507(5)  |
| C1_24-C10_24   | 1.490(4) | C4_28-C5_28    | 1.415(5)  |
| C2_24-C3_24    | 1.418(4) | C4_28-C7_28    | 1.508(5)  |
| C2_24-C9_24    | 1.505(4) | C5_28-C6_28    | 1.503(5)  |
| C3_24-C4_24    | 1.408(4) | C6_28-H6A_28   | 0.9800    |
| C3_24-C8_24    | 1.510(4) | C6_28-H6B_28   | 0.9800    |
| C4_24-C5_24    | 1.428(4) | C6_28-H6C_28   | 0.9800    |
| C4_24-C7_24    | 1.507(4) | C7_28-H7A_28   | 0.9800    |
| C5_24-C6_24    | 1.499(4) | C7_28-H7B_28   | 0.9800    |
| C6_24-H6A_24   | 0.9800   | C7_28-H7C_28   | 0.9800    |
| C6_24-H6B_24   | 0.9800   | C8_28-H8A_28   | 0.9800    |
| C6_24-H6C_24   | 0.9800   | C8_28-H8B_28   | 0.9800    |
| C7_24-H7A_24   | 0.9800   | C8_28-H8C_28   | 0.9800    |
| C7_24-H7B_24   | 0.9800   | C9_28-H9A_28   | 0.9800    |
| C7_24-H7C_24   | 0.9800   | C9_28-H9B_28   | 0.9800    |
| C8_24-H8A_24   | 0.9800   | C9_28-H9C_28   | 0.9800    |
| C8_24-H8B_24   | 0.9800   | C10_28-H10A_28 | 0.9800    |
| C8_24-H8C_24   | 0.9800   | C10_28-H10B_28 | 0.9800    |
| C9_24-H9A_24   | 0.9800   | C10_28-H10C_28 | 0.9800    |
| C9_24-H9B_24   | 0.9800   | C1_30-C6_30    | 1.343(10) |
| C9_24-H9C_24   | 0.9800   | C1_30-C2_30    | 1.363(11) |
| C10_24-H10A_24 | 0.9800   | C1_30-F1_30    | 1.381(10) |
| C10_24-H10B_24 | 0.9800   | C2_30-C3_30    | 1.342(10) |
| C10_24-H10C_24 | 0.9800   | C2_30-H2_30    | 0.9500    |
| C1_27-C5_27    | 1.408(5) | C3_30-C4_30    | 1.340(10) |
| C1_27-C2_27    | 1.419(5) | C3_30-F2_30    | 1.353(9)  |
| C1_27-C10_27   | 1.493(5) | C4_30-C5_30    | 1.422(11) |
| C2_27-C3_27    | 1.404(5) | C4_30-H4_30    | 0.9500    |
| C2_27-C9_27    | 1.504(5) | C5_30-C6_30    | 1.420(11) |
| C3_27-C4_27    | 1.447(5) | C5_30-H5_30    | 0.9500    |
| C3_27-C8_27    | 1.486(5) | C6_30-H6_30    | 0.9500    |
| C4_27-C5_27    | 1.420(5) | C1_16-C6_16    | 1.267(11) |
| C4_27-C7_27    | 1.503(5) | C1_16-C2_16    | 1.298(12) |
| C5_27-C6_27    | 1.509(5) | C1_16-F1_16    | 1.304(11) |
| C6_27-H6A_27   | 0.9800   | C2_16-C3_16    | 1.294(12) |
| C6_27-H6B_27   | 0.9800   | C2_16-H2_16    | 0.9500    |
| C6_27-H6C_27   | 0.9800   | C3_16-C4_16    | 1.317(12) |
| C7_27-H7A_27   | 0.9800   | C3_16-F2_16    | 1.329(12) |
| C7_27-H7B_27   | 0.9800   | C4_16-C5_16    | 1.488(13) |
| C7_27-H7C_27   | 0.9800   | C4_16-H4_16    | 0.9500    |
| C8_27-H8A_27   | 0.9800   | C5_16-C6_16    | 1.515(13) |
| C8_27-H8B_27   | 0.9800   | C5_16-H5_16    | 0.9500    |
| C8_27-H8C_27   | 0.9800   | C6_16-H6_16    | 0.9500    |
| C9_27-H9A_27   | 0.9800   | C1_31-C6_31    | 1.339(13) |
| C9_27-H9B_27   | 0.9800   | C1_31-F1_31    | 1.346(12) |
| C9_27-H9C_27   | 0.9800   | C1_31-C2_31    | 1.355(13) |
| C10_27-H10A_27 | 0.9800   | C2_31-C3_31    | 1.357(13) |
| C10_27-H10B_27 | 0.9800   | C2_31-H2_31    | 0.9500    |
| C10_27-H10C_27 | 0.9800   | C3_31-C4_31    | 1.319(14) |
| C1_28-C2_28    | 1.421(5) | C3_31-F2_31    | 1.341(13) |
| C1_28-C5_28    | 1.423(5) | C4_31-C5_31    | 1.456(14) |
| C1_28-C10_28   | 1.502(5) | C4_31-H4_31    | 0.9500    |
| C2_28-C3_28    | 1.426(5) | C5_31-C6_31    | 1.452(13) |
| C2_28-C9_28    | 1.503(5) | C5_31-H5_31    | 0.9500    |
| C3_28-C4_28    | 1.415(5) | C6_31-H6_31    | 0.9500    |

|             |           |                       |                  |
|-------------|-----------|-----------------------|------------------|
| O1_32-C1_32 | 1.354(14) | C2_37-C3_37           | 1.340(15)        |
| C1_32-C3_32 | 1.545(12) | C2_37-H2_37           | 0.9500           |
| C1_32-C2_32 | 1.548(13) | C3_37-C4_37           | 1.327(15)        |
| C1_32-C4_32 | 1.553(13) | C3_37-F2_37           | 1.344(15)        |
| C2_32-F2_32 | 1.332(14) | C4_37-C5_37           | 1.462(16)        |
| C2_32-F3_32 | 1.333(13) | C4_37-H4_37           | 0.9500           |
| C2_32-F1_32 | 1.337(13) | C5_37-C6_37           | 1.464(15)        |
| C3_32-F5_32 | 1.327(13) | C5_37-H5_37           | 0.9500           |
| C3_32-F6_32 | 1.335(13) | C6_37-H6_37           | 0.9500           |
| C3_32-F4_32 | 1.339(13) | C1_41-F1_41           | 1.315(13)        |
| C4_32-F7_32 | 1.331(13) | C1_41-C2_41           | 1.344(14)        |
| C4_32-F9_32 | 1.332(13) | C1_41-C6_41           | 1.346(14)        |
| C4_32-F8_32 | 1.337(14) | C2_41-C3_41           | 1.330(14)        |
| O1_33-C1_33 | 1.358(14) | C2_41-H2_41           | 0.9500           |
| C1_33-C2_33 | 1.537(13) | C3_41-F2_41           | 1.299(14)        |
| C1_33-C3_33 | 1.543(13) | C3_41-C4_41           | 1.308(15)        |
| C1_33-C4_33 | 1.556(13) | C4_41-C5_41           | 1.472(15)        |
| C2_33-F3_33 | 1.326(13) | C4_41-H4_41           | 0.9500           |
| C2_33-F1_33 | 1.331(13) | C5_41-C6_41           | 1.527(14)        |
| C2_33-F2_33 | 1.340(14) | C5_41-H5_41           | 0.9500           |
| C3_33-F4_33 | 1.338(14) | C6_41-H6_41           | 0.9500           |
| C3_33-F6_33 | 1.340(13) |                       |                  |
| C3_33-F5_33 | 1.341(14) | <b>Atom-Atom-Atom</b> | <b>Angle [°]</b> |
| C4_33-F9_33 | 1.316(14) | Al6-Ga3-Al7           | 75.48(13)        |
| C4_33-F8_33 | 1.322(14) | Al6-Ga3-Al8           | 74.02(13)        |
| C4_33-F7_33 | 1.332(14) | Al7-Ga3-Al8           | 75.9(3)          |
| O1_35-C1_35 | 1.359(14) | Al6-Ga3-Ga2           | 137.13(9)        |
| C1_35-C2_35 | 1.544(12) | Al7-Ga3-Ga2           | 122.21(16)       |
| C1_35-C3_35 | 1.551(13) | Al8-Ga3-Ga2           | 144.23(15)       |
| C1_35-C4_35 | 1.555(13) | C4_19-Al6-C3_19       | 38.4(3)          |
| C2_35-F3_35 | 1.333(13) | C4_19-Al6-C5_19       | 38.0(3)          |
| C2_35-F1_35 | 1.335(13) | C3_19-Al6-C5_19       | 62.9(4)          |
| C2_35-F2_35 | 1.335(13) | C4_19-Al6-C1_19       | 63.6(4)          |
| C3_35-F5_35 | 1.329(14) | C3_19-Al6-C1_19       | 62.6(3)          |
| C3_35-F6_35 | 1.331(14) | C5_19-Al6-C1_19       | 37.4(3)          |
| C3_35-F4_35 | 1.335(14) | C4_19-Al6-C2_19       | 63.8(4)          |
| C4_35-F9_35 | 1.330(14) | C3_19-Al6-C2_19       | 37.6(3)          |
| C4_35-F8_35 | 1.332(13) | C5_19-Al6-C2_19       | 62.6(4)          |
| C4_35-F7_35 | 1.334(14) | C1_19-Al6-C2_19       | 37.2(3)          |
| O1_36-C1_36 | 1.344(14) | C4_19-Al6-Ga3         | 160.1(3)         |
| C1_36-C4_36 | 1.544(13) | C3_19-Al6-Ga3         | 160.9(3)         |
| C1_36-C2_36 | 1.550(13) | C5_19-Al6-Ga3         | 133.5(3)         |
| C1_36-C3_36 | 1.556(13) | C1_19-Al6-Ga3         | 122.2(3)         |
| C2_36-F3_36 | 1.329(14) | C2_19-Al6-Ga3         | 133.5(3)         |
| C2_36-F1_36 | 1.334(14) | C2_21-Al7-C1_21       | 38.7(3)          |
| C2_36-F2_36 | 1.344(14) | C2_21-Al7-C3_21       | 37.6(3)          |
| C3_36-F4_36 | 1.334(14) | C1_21-Al7-C3_21       | 63.6(4)          |
| C3_36-F6_36 | 1.335(14) | C2_21-Al7-C5_21       | 61.5(4)          |
| C3_36-F5_36 | 1.346(14) | C1_21-Al7-C5_21       | 36.7(3)          |
| C4_36-F9_36 | 1.332(14) | C3_21-Al7-C5_21       | 60.9(4)          |
| C4_36-F7_36 | 1.333(14) | C2_21-Al7-C4_21       | 62.0(5)          |
| C4_36-F8_36 | 1.338(14) | C1_21-Al7-C4_21       | 62.6(5)          |
| C1_37-C6_37 | 1.327(15) | C3_21-Al7-C4_21       | 36.6(4)          |
| C1_37-C2_37 | 1.335(15) | C5_21-Al7-C4_21       | 36.4(3)          |
| C1_37-F1_37 | 1.346(14) | C2_21-Al7-Ga3         | 136.5(4)         |



|                 |            |                  |            |
|-----------------|------------|------------------|------------|
| C1_21-Al7-Ga3   | 117.7(4)   | C4_24-Al3-C5_24  | 37.89(12)  |
| C3_21-Al7-Ga3   | 169.5(4)   | C4_24-Al3-C3_24  | 37.15(10)  |
| C5_21-Al7-Ga3   | 127.0(4)   | C5_24-Al3-C3_24  | 62.38(11)  |
| C4_21-Al7-Ga3   | 153.9(4)   | C4_24-Al3-C2_24  | 62.32(10)  |
| C1_23-Al8-C5_23 | 39.3(4)    | C5_24-Al3-C2_24  | 62.12(10)  |
| C1_23-Al8-C2_23 | 38.1(4)    | C3_24-Al3-C2_24  | 37.23(9)   |
| C5_23-Al8-C2_23 | 63.4(5)    | C4_24-Al3-C1_24  | 62.94(11)  |
| C1_23-Al8-C4_23 | 63.4(5)    | C5_24-Al3-C1_24  | 37.55(11)  |
| C5_23-Al8-C4_23 | 37.1(4)    | C3_24-Al3-C1_24  | 62.26(10)  |
| C2_23-Al8-C4_23 | 61.8(5)    | C2_24-Al3-C1_24  | 36.92(10)  |
| C1_23-Al8-C3_23 | 62.4(5)    | C4_24-Al3-Ga1    | 163.79(9)  |
| C5_23-Al8-C3_23 | 61.7(5)    | C5_24-Al3-Ga1    | 158.28(10) |
| C2_23-Al8-C3_23 | 36.5(3)    | C3_24-Al3-Ga1    | 132.98(8)  |
| C4_23-Al8-C3_23 | 36.3(4)    | C2_24-Al3-Ga1    | 118.57(8)  |
| C1_23-Al8-Ga3   | 133.4(4)   | C1_24-Al3-Ga1    | 128.70(8)  |
| C5_23-Al8-Ga3   | 114.7(5)   | Al10-Ga2-Al11    | 75.8(3)    |
| C2_23-Al8-Ga3   | 169.0(4)   | Al10-Ga2-Al9     | 76.14(11)  |
| C4_23-Al8-Ga3   | 124.1(5)   | Al11-Ga2-Al9     | 76.98(12)  |
| C3_23-Al8-Ga3   | 153.7(5)   | Al10-Ga2-Ga3     | 118.13(15) |
| Al3-Ga1-Al1     | 75.64(3)   | Al11-Ga2-Ga3     | 138.53(14) |
| Al3-Ga1-Al2     | 74.76(3)   | Al9-Ga2-Ga3      | 142.28(8)  |
| Al1-Ga1-Al2     | 75.01(4)   | C1_18-Al9-C2_18  | 37.8(2)    |
| Al3-Ga1-Ga1     | 130.13(3)  | C1_18-Al9-C5_18  | 37.3(2)    |
| Al1-Ga1-Ga1     | 140.82(3)  | C2_18-Al9-C5_18  | 62.8(2)    |
| Al2-Ga1-Ga1     | 134.28(3)  | C1_18-Al9-C3_18  | 62.4(3)    |
| C2_28-Al1-C1_28 | 37.73(13)  | C2_18-Al9-C3_18  | 37.4(2)    |
| C2_28-Al1-C3_28 | 37.83(14)  | C5_18-Al9-C3_18  | 62.2(3)    |
| C1_28-Al1-C3_28 | 62.88(14)  | C1_18-Al9-C4_18  | 62.0(3)    |
| C2_28-Al1-C4_28 | 62.72(14)  | C2_18-Al9-C4_18  | 62.4(3)    |
| C1_28-Al1-C4_28 | 62.55(14)  | C5_18-Al9-C4_18  | 36.9(3)    |
| C3_28-Al1-C4_28 | 37.23(13)  | C3_18-Al9-C4_18  | 37.1(3)    |
| C2_28-Al1-C5_28 | 62.69(13)  | C1_18-Al9-Ga2    | 166.3(2)   |
| C1_28-Al1-C5_28 | 37.50(13)  | C2_18-Al9-Ga2    | 152.6(2)   |
| C3_28-Al1-C5_28 | 62.26(13)  | C5_18-Al9-Ga2    | 130.3(2)   |
| C4_28-Al1-C5_28 | 37.06(13)  | C3_18-Al9-Ga2    | 121.0(3)   |
| C2_28-Al1-Ga1   | 160.78(10) | C4_18-Al9-Ga2    | 111.7(3)   |
| C1_28-Al1-Ga1   | 161.48(10) | C3_20-Al10-C4_20 | 38.4(3)    |
| C3_28-Al1-Ga1   | 131.01(10) | C3_20-Al10-C2_20 | 38.7(4)    |
| C4_28-Al1-Ga1   | 119.19(10) | C4_20-Al10-C2_20 | 63.4(4)    |
| C5_28-Al1-Ga1   | 131.76(10) | C3_20-Al10-C5_20 | 62.6(4)    |
| C4_27-Al2-C1_27 | 61.93(14)  | C4_20-Al10-C5_20 | 36.9(3)    |
| C4_27-Al2-C5_27 | 37.47(14)  | C2_20-Al10-C5_20 | 61.5(4)    |
| C1_27-Al2-C5_27 | 37.11(12)  | C3_20-Al10-C1_20 | 63.2(5)    |
| C4_27-Al2-C2_27 | 62.25(13)  | C4_20-Al10-C1_20 | 62.7(4)    |
| C1_27-Al2-C2_27 | 37.39(12)  | C2_20-Al10-C1_20 | 36.5(4)    |
| C5_27-Al2-C2_27 | 62.63(13)  | C5_20-Al10-C1_20 | 37.0(3)    |
| C4_27-Al2-C3_27 | 38.12(14)  | C3_20-Al10-Ga2   | 160.4(4)   |
| C1_27-Al2-C3_27 | 62.30(14)  | C4_20-Al10-Ga2   | 130.0(4)   |
| C5_27-Al2-C3_27 | 63.31(14)  | C2_20-Al10-Ga2   | 160.9(4)   |
| C2_27-Al2-C3_27 | 36.88(13)  | C5_20-Al10-Ga2   | 119.0(4)   |
| C4_27-Al2-Ga1   | 116.55(11) | C1_20-Al10-Ga2   | 131.3(4)   |
| C1_27-Al2-Ga1   | 164.22(10) | C2_22-Al11-C3_22 | 38.2(4)    |
| C5_27-Al2-Ga1   | 131.52(10) | C2_22-Al11-C1_22 | 37.8(4)    |
| C2_27-Al2-Ga1   | 157.90(10) | C3_22-Al11-C1_22 | 62.4(5)    |
| C3_27-Al2-Ga1   | 127.47(11) | C2_22-Al11-C4_22 | 61.8(5)    |

|                  |           |                |          |
|------------------|-----------|----------------|----------|
| C3_22-AI11-C4_22 | 36.5(4)   | F9_1-C4_1-F7_1 | 108.2(6) |
| C1_22-AI11-C4_22 | 60.3(5)   | F9_1-C4_1-F8_1 | 108.2(7) |
| C2_22-AI11-C5_22 | 61.4(5)   | F7_1-C4_1-F8_1 | 107.6(7) |
| C3_22-AI11-C5_22 | 60.7(5)   | F9_1-C4_1-C1_1 | 110.8(6) |
| C1_22-AI11-C5_22 | 35.9(4)   | F7_1-C4_1-C1_1 | 110.1(6) |
| C4_22-AI11-C5_22 | 35.4(3)   | F8_1-C4_1-C1_1 | 111.8(6) |
| C2_22-AI11-Ga2   | 159.8(5)  | C1_2-O1_2-AI5  | 146.6(4) |
| C3_22-AI11-Ga2   | 124.8(5)  | O1_2-C1_2-C4_2 | 110.6(5) |
| C1_22-AI11-Ga2   | 158.5(4)  | O1_2-C1_2-C3_2 | 110.5(5) |
| C4_22-AI11-Ga2   | 111.7(5)  | C4_2-C1_2-C3_2 | 110.0(6) |
| C5_22-AI11-Ga2   | 125.8(4)  | O1_2-C1_2-C2_2 | 107.0(5) |
| O1_33-AI4-O1_14  | 116.0(15) | C4_2-C1_2-C2_2 | 110.2(6) |
| O1_26-AI4-O1_35  | 101(2)    | C3_2-C1_2-C2_2 | 108.6(5) |
| O1_33-AI4-O1_15  | 97.4(13)  | F3_2-C2_2-F2_2 | 109.2(7) |
| O1_14-AI4-O1_15  | 101.9(15) | F3_2-C2_2-F1_2 | 106.9(6) |
| O1_8-AI4-O1_7    | 109.9(4)  | F2_2-C2_2-F1_2 | 106.8(5) |
| O1_8-AI4-O1_5    | 105.9(2)  | F3_2-C2_2-C1_2 | 111.4(6) |
| O1_7-AI4-O1_5    | 111.1(4)  | F2_2-C2_2-C1_2 | 112.5(6) |
| O1_8-AI4-O1_6    | 111.8(4)  | F1_2-C2_2-C1_2 | 109.9(5) |
| O1_7-AI4-O1_6    | 108.7(4)  | F4_2-C3_2-F5_2 | 107.6(5) |
| O1_5-AI4-O1_6    | 109.4(3)  | F4_2-C3_2-F6_2 | 107.0(6) |
| O1_33-AI4-O1_17  | 115.0(14) | F5_2-C3_2-F6_2 | 108.2(5) |
| O1_14-AI4-O1_17  | 119.7(15) | F4_2-C3_2-C1_2 | 110.2(5) |
| O1_15-AI4-O1_17  | 101.3(13) | F5_2-C3_2-C1_2 | 111.5(5) |
| O1_10-AI5-O1_13  | 113.0(10) | F6_2-C3_2-C1_2 | 112.0(5) |
| O1_10-AI5-O1_11  | 114.3(10) | F9_2-C4_2-F8_2 | 106.9(7) |
| O1_13-AI5-O1_11  | 114.0(6)  | F9_2-C4_2-F7_2 | 107.4(9) |
| O1_2-AI5-O1_3    | 116.7(4)  | F8_2-C4_2-F7_2 | 107.5(7) |
| O1_2-AI5-O1_1    | 110.6(3)  | F9_2-C4_2-C1_2 | 111.5(7) |
| O1_3-AI5-O1_1    | 104.6(4)  | F8_2-C4_2-C1_2 | 111.9(7) |
| O1_2-AI5-O1_4    | 109.3(4)  | F7_2-C4_2-C1_2 | 111.4(7) |
| O1_3-AI5-O1_4    | 106.1(5)  | C1_3-O1_3-AI5  | 147.9(6) |
| O1_1-AI5-O1_4    | 109.1(6)  | O1_3-C1_3-C3_3 | 112.3(6) |
| O1_10-AI5-O1_12  | 107.7(9)  | O1_3-C1_3-C2_3 | 107.2(6) |
| O1_13-AI5-O1_12  | 102.7(8)  | C3_3-C1_3-C2_3 | 110.4(6) |
| O1_11-AI5-O1_12  | 103.9(4)  | O1_3-C1_3-C4_3 | 109.2(6) |
| C1_1-O1_1-AI5    | 144.4(5)  | C3_3-C1_3-C4_3 | 110.1(5) |
| O1_1-C1_1-C3_1   | 112.7(6)  | C2_3-C1_3-C4_3 | 107.4(5) |
| O1_1-C1_1-C4_1   | 110.4(6)  | F3_3-C2_3-F1_3 | 108.2(6) |
| C3_1-C1_1-C4_1   | 109.6(6)  | F3_3-C2_3-F2_3 | 108.3(6) |
| O1_1-C1_1-C2_1   | 107.0(6)  | F1_3-C2_3-F2_3 | 108.1(6) |
| C3_1-C1_1-C2_1   | 109.2(6)  | F3_3-C2_3-C1_3 | 110.6(5) |
| C4_1-C1_1-C2_1   | 107.7(6)  | F1_3-C2_3-C1_3 | 110.6(6) |
| F1_1-C2_1-F2_1   | 108.2(7)  | F2_3-C2_3-C1_3 | 111.0(6) |
| F1_1-C2_1-F3_1   | 109.1(8)  | F4_3-C3_3-F6_3 | 107.6(5) |
| F2_1-C2_1-F3_1   | 107.6(6)  | F4_3-C3_3-F5_3 | 107.5(6) |
| F1_1-C2_1-C1_1   | 109.2(7)  | F6_3-C3_3-F5_3 | 108.2(6) |
| F2_1-C2_1-C1_1   | 112.8(7)  | F4_3-C3_3-C1_3 | 110.8(5) |
| F3_1-C2_1-C1_1   | 109.9(5)  | F6_3-C3_3-C1_3 | 112.7(6) |
| F6_1-C3_1-F5_1   | 104.9(6)  | F5_3-C3_3-C1_3 | 109.9(6) |
| F6_1-C3_1-F4_1   | 109.7(8)  | F9_3-C4_3-F8_3 | 107.8(5) |
| F5_1-C3_1-F4_1   | 106.9(8)  | F9_3-C4_3-F7_3 | 107.5(5) |
| F6_1-C3_1-C1_1   | 114.5(6)  | F8_3-C4_3-F7_3 | 107.6(5) |
| F5_1-C3_1-C1_1   | 110.9(6)  | F9_3-C4_3-C1_3 | 112.3(5) |
| F4_1-C3_1-C1_1   | 109.7(7)  | F8_3-C4_3-C1_3 | 112.4(5) |

|                |           |                |          |
|----------------|-----------|----------------|----------|
| F7_3-C4_3-C1_3 | 109.0(5)  | O1_6-C1_6-C4_6 | 107.4(5) |
| C1_4-O1_4-AI5  | 146.9(10) | C2_6-C1_6-C4_6 | 108.6(4) |
| O1_4-C1_4-C3_4 | 111.8(8)  | C3_6-C1_6-C4_6 | 108.7(4) |
| O1_4-C1_4-C2_4 | 111.1(7)  | F1_6-C2_6-F2_6 | 107.3(5) |
| C3_4-C1_4-C2_4 | 109.2(5)  | F1_6-C2_6-F3_6 | 108.1(4) |
| O1_4-C1_4-C4_4 | 106.5(7)  | F2_6-C2_6-F3_6 | 106.2(5) |
| C3_4-C1_4-C4_4 | 108.9(5)  | F1_6-C2_6-C1_6 | 110.9(4) |
| C2_4-C1_4-C4_4 | 109.2(5)  | F2_6-C2_6-C1_6 | 114.3(5) |
| F1_4-C2_4-F3_4 | 106.6(5)  | F3_6-C2_6-C1_6 | 109.8(4) |
| F1_4-C2_4-F2_4 | 108.2(5)  | F4_6-C3_6-F5_6 | 108.6(5) |
| F3_4-C2_4-F2_4 | 108.7(5)  | F4_6-C3_6-F6_6 | 106.9(5) |
| F1_4-C2_4-C1_4 | 111.3(5)  | F5_6-C3_6-F6_6 | 108.1(5) |
| F3_4-C2_4-C1_4 | 110.5(5)  | F4_6-C3_6-C1_6 | 111.2(4) |
| F2_4-C2_4-C1_4 | 111.3(5)  | F5_6-C3_6-C1_6 | 110.6(4) |
| F4_4-C3_4-F5_4 | 108.0(6)  | F6_6-C3_6-C1_6 | 111.4(5) |
| F4_4-C3_4-F6_4 | 107.4(5)  | F7_6-C4_6-F9_6 | 108.8(4) |
| F5_4-C3_4-F6_4 | 106.2(6)  | F7_6-C4_6-F8_6 | 107.1(4) |
| F4_4-C3_4-C1_4 | 111.2(5)  | F9_6-C4_6-F8_6 | 107.4(5) |
| F5_4-C3_4-C1_4 | 110.9(5)  | F7_6-C4_6-C1_6 | 111.0(4) |
| F6_4-C3_4-C1_4 | 112.9(5)  | F9_6-C4_6-C1_6 | 110.7(4) |
| F7_4-C4_4-F9_4 | 108.0(6)  | F8_6-C4_6-C1_6 | 111.7(5) |
| F7_4-C4_4-F8_4 | 108.3(6)  | C1_7-O1_7-AI4  | 143.1(8) |
| F9_4-C4_4-F8_4 | 107.7(6)  | O1_7-C1_7-C2_7 | 111.3(6) |
| F7_4-C4_4-C1_4 | 111.3(6)  | O1_7-C1_7-C4_7 | 107.8(6) |
| F9_4-C4_4-C1_4 | 109.6(6)  | C2_7-C1_7-C4_7 | 108.6(5) |
| F8_4-C4_4-C1_4 | 111.8(6)  | O1_7-C1_7-C3_7 | 109.5(6) |
| C1_5-O1_5-AI4  | 148.0(3)  | C2_7-C1_7-C3_7 | 110.8(5) |
| O1_5-C1_5-C2_5 | 107.6(3)  | C4_7-C1_7-C3_7 | 108.8(5) |
| O1_5-C1_5-C3_5 | 108.7(3)  | F3_7-C2_7-F1_7 | 107.8(7) |
| C2_5-C1_5-C3_5 | 109.8(3)  | F3_7-C2_7-F2_7 | 107.7(7) |
| O1_5-C1_5-C4_5 | 112.1(3)  | F1_7-C2_7-F2_7 | 107.3(7) |
| C2_5-C1_5-C4_5 | 109.3(3)  | F3_7-C2_7-C1_7 | 110.0(6) |
| C3_5-C1_5-C4_5 | 109.4(3)  | F1_7-C2_7-C1_7 | 110.6(6) |
| F3_5-C2_5-F1_5 | 108.9(4)  | F2_7-C2_7-C1_7 | 113.2(7) |
| F3_5-C2_5-F2_5 | 107.7(4)  | F4_7-C3_7-F5_7 | 108.7(6) |
| F1_5-C2_5-F2_5 | 105.3(3)  | F4_7-C3_7-F6_7 | 106.5(6) |
| F3_5-C2_5-C1_5 | 112.2(3)  | F5_7-C3_7-F6_7 | 106.1(7) |
| F1_5-C2_5-C1_5 | 109.8(3)  | F4_7-C3_7-C1_7 | 111.9(6) |
| F2_5-C2_5-C1_5 | 112.7(3)  | F5_7-C3_7-C1_7 | 111.2(6) |
| F5_5-C3_5-F4_5 | 107.7(3)  | F6_7-C3_7-C1_7 | 112.2(7) |
| F5_5-C3_5-F6_5 | 106.5(3)  | F7_7-C4_7-F9_7 | 106.5(6) |
| F4_5-C3_5-F6_5 | 108.0(3)  | F7_7-C4_7-F8_7 | 108.3(6) |
| F5_5-C3_5-C1_5 | 111.1(3)  | F9_7-C4_7-F8_7 | 107.2(6) |
| F4_5-C3_5-C1_5 | 110.8(3)  | F7_7-C4_7-C1_7 | 110.9(6) |
| F6_5-C3_5-C1_5 | 112.6(3)  | F9_7-C4_7-C1_7 | 110.6(6) |
| F7_5-C4_5-F8_5 | 107.3(3)  | F8_7-C4_7-C1_7 | 113.1(6) |
| F7_5-C4_5-F9_5 | 106.2(4)  | C1_8-O1_8-AI4  | 150.1(4) |
| F8_5-C4_5-F9_5 | 108.8(3)  | O1_8-C1_8-C3_8 | 111.6(4) |
| F7_5-C4_5-C1_5 | 111.1(3)  | O1_8-C1_8-C4_8 | 109.9(4) |
| F8_5-C4_5-C1_5 | 112.6(3)  | C3_8-C1_8-C4_8 | 110.5(4) |
| F9_5-C4_5-C1_5 | 110.6(3)  | O1_8-C1_8-C2_8 | 106.8(4) |
| C1_6-O1_6-AI4  | 146.6(7)  | C3_8-C1_8-C2_8 | 109.3(4) |
| O1_6-C1_6-C2_6 | 111.8(5)  | C4_8-C1_8-C2_8 | 108.7(4) |
| O1_6-C1_6-C3_6 | 110.5(5)  | F3_8-C2_8-F1_8 | 107.9(4) |
| C2_6-C1_6-C3_6 | 109.8(4)  | F3_8-C2_8-F2_8 | 108.1(4) |

|                   |           |                   |           |
|-------------------|-----------|-------------------|-----------|
| F1_8-C2_8-F2_8    | 107.4(4)  | F6_11-C3_11-F5_11 | 109.0(10) |
| F3_8-C2_8-C1_8    | 111.5(4)  | F4_11-C3_11-F5_11 | 109.1(12) |
| F1_8-C2_8-C1_8    | 110.3(3)  | F6_11-C3_11-C1_11 | 112.8(9)  |
| F2_8-C2_8-C1_8    | 111.4(4)  | F4_11-C3_11-C1_11 | 109.9(11) |
| F6_8-C3_8-F5_8    | 106.9(4)  | F5_11-C3_11-C1_11 | 110.8(8)  |
| F6_8-C3_8-F4_8    | 107.1(4)  | F8_11-C4_11-F9_11 | 107.9(8)  |
| F5_8-C3_8-F4_8    | 107.2(4)  | F8_11-C4_11-F7_11 | 108.1(8)  |
| F6_8-C3_8-C1_8    | 113.8(4)  | F9_11-C4_11-F7_11 | 106.3(9)  |
| F5_8-C3_8-C1_8    | 111.7(4)  | F8_11-C4_11-C1_11 | 113.2(8)  |
| F4_8-C3_8-C1_8    | 109.9(4)  | F9_11-C4_11-C1_11 | 110.9(8)  |
| F9_8-C4_8-F8_8    | 108.1(4)  | F7_11-C4_11-C1_11 | 110.2(8)  |
| F9_8-C4_8-F7_8    | 105.6(4)  | C1_12-O1_12-AI5   | 150.2(7)  |
| F8_8-C4_8-F7_8    | 106.4(4)  | O1_12-C1_12-C4_12 | 109.5(9)  |
| F9_8-C4_8-C1_8    | 112.5(4)  | O1_12-C1_12-C3_12 | 110.7(9)  |
| F8_8-C4_8-C1_8    | 114.7(4)  | C4_12-C1_12-C3_12 | 110.0(9)  |
| F7_8-C4_8-C1_8    | 109.1(4)  | O1_12-C1_12-C2_12 | 107.9(8)  |
| C1_10-O1_10-AI5   | 152(2)    | C4_12-C1_12-C2_12 | 110.9(9)  |
| O1_10-C1_10-C3_10 | 109.0(12) | C3_12-C1_12-C2_12 | 107.7(9)  |
| O1_10-C1_10-C2_10 | 109.8(11) | F3_12-C2_12-F2_12 | 109.8(9)  |
| C3_10-C1_10-C2_10 | 110.2(8)  | F3_12-C2_12-F1_12 | 106.5(8)  |
| O1_10-C1_10-C4_10 | 109.6(13) | F2_12-C2_12-F1_12 | 107.5(8)  |
| C3_10-C1_10-C4_10 | 109.3(8)  | F3_12-C2_12-C1_12 | 110.9(8)  |
| C2_10-C1_10-C4_10 | 108.9(8)  | F2_12-C2_12-C1_12 | 112.0(8)  |
| F3_10-C2_10-F1_10 | 106.5(9)  | F1_12-C2_12-C1_12 | 109.8(8)  |
| F3_10-C2_10-F2_10 | 109.9(9)  | F5_12-C3_12-F6_12 | 107.2(11) |
| F1_10-C2_10-F2_10 | 106.4(8)  | F5_12-C3_12-F4_12 | 109.8(15) |
| F3_10-C2_10-C1_10 | 112.1(8)  | F6_12-C3_12-F4_12 | 106.2(12) |
| F1_10-C2_10-C1_10 | 109.3(9)  | F5_12-C3_12-C1_12 | 111.6(11) |
| F2_10-C2_10-C1_10 | 112.3(7)  | F6_12-C3_12-C1_12 | 112.4(10) |
| F5_10-C3_10-F6_10 | 105.3(9)  | F4_12-C3_12-C1_12 | 109.5(12) |
| F5_10-C3_10-F4_10 | 106.9(9)  | F9_12-C4_12-F7_12 | 107.7(12) |
| F6_10-C3_10-F4_10 | 107.2(9)  | F9_12-C4_12-F8_12 | 107.9(12) |
| F5_10-C3_10-C1_10 | 111.3(8)  | F7_12-C4_12-F8_12 | 106.2(10) |
| F6_10-C3_10-C1_10 | 113.1(9)  | F9_12-C4_12-C1_12 | 111.8(12) |
| F4_10-C3_10-C1_10 | 112.5(9)  | F7_12-C4_12-C1_12 | 110.6(9)  |
| F8_10-C4_10-F9_10 | 109.3(8)  | F8_12-C4_12-C1_12 | 112.3(9)  |
| F8_10-C4_10-F7_10 | 106.6(7)  | C1_13-O1_13-AI5   | 157.8(14) |
| F9_10-C4_10-F7_10 | 106.7(8)  | O1_13-C1_13-C3_13 | 109.7(10) |
| F8_10-C4_10-C1_10 | 112.8(8)  | O1_13-C1_13-C2_13 | 110.3(11) |
| F9_10-C4_10-C1_10 | 110.3(7)  | C3_13-C1_13-C2_13 | 110.5(8)  |
| F7_10-C4_10-C1_10 | 110.9(7)  | O1_13-C1_13-C4_13 | 109.1(9)  |
| C1_11-O1_11-AI5   | 143.8(7)  | C3_13-C1_13-C4_13 | 108.9(8)  |
| O1_11-C1_11-C4_11 | 108.5(8)  | C2_13-C1_13-C4_13 | 108.2(8)  |
| O1_11-C1_11-C2_11 | 112.0(8)  | F1_13-C2_13-F3_13 | 107.9(8)  |
| C4_11-C1_11-C2_11 | 108.4(8)  | F1_13-C2_13-F2_13 | 109.8(9)  |
| O1_11-C1_11-C3_11 | 110.8(8)  | F3_13-C2_13-F2_13 | 108.8(8)  |
| C4_11-C1_11-C3_11 | 108.4(8)  | F1_13-C2_13-C1_13 | 109.7(8)  |
| C2_11-C1_11-C3_11 | 108.6(8)  | F3_13-C2_13-C1_13 | 109.5(8)  |
| F3_11-C2_11-F1_11 | 106.4(11) | F2_13-C2_13-C1_13 | 111.2(8)  |
| F3_11-C2_11-F2_11 | 107.0(9)  | F4_13-C3_13-F6_13 | 106.2(8)  |
| F1_11-C2_11-F2_11 | 106.6(11) | F4_13-C3_13-F5_13 | 108.6(10) |
| F3_11-C2_11-C1_11 | 109.2(8)  | F6_13-C3_13-F5_13 | 110.6(10) |
| F1_11-C2_11-C1_11 | 114.5(11) | F4_13-C3_13-C1_13 | 110.9(8)  |
| F2_11-C2_11-C1_11 | 112.6(9)  | F6_13-C3_13-C1_13 | 110.9(8)  |
| F6_11-C3_11-F4_11 | 105.1(12) | F5_13-C3_13-C1_13 | 109.5(9)  |

|                   |           |                    |           |
|-------------------|-----------|--------------------|-----------|
| F9_13-C4_13-F8_13 | 106.6(8)  | F7_15-C4_15-C1_15  | 110.0(13) |
| F9_13-C4_13-F7_13 | 109.9(9)  | C5_18-C1_18-C2_18  | 108.8(6)  |
| F8_13-C4_13-F7_13 | 108.6(8)  | C5_18-C1_18-C10_18 | 125.4(7)  |
| F9_13-C4_13-C1_13 | 110.9(7)  | C2_18-C1_18-C10_18 | 125.6(7)  |
| F8_13-C4_13-C1_13 | 112.9(8)  | C5_18-C1_18-AI9    | 72.3(4)   |
| F7_13-C4_13-C1_13 | 107.8(8)  | C2_18-C1_18-AI9    | 71.6(3)   |
| C1_14-O1_14-AI4   | 154(3)    | C10_18-C1_18-AI9   | 126.2(4)  |
| O1_14-C1_14-C2_14 | 111.0(15) | C3_18-C2_18-C1_18  | 106.9(6)  |
| O1_14-C1_14-C4_14 | 110.0(17) | C3_18-C2_18-C9_18  | 126.0(7)  |
| C2_14-C1_14-C4_14 | 108.8(10) | C1_18-C2_18-C9_18  | 127.0(7)  |
| O1_14-C1_14-C3_14 | 108.3(16) | C3_18-C2_18-AI9    | 71.8(4)   |
| C2_14-C1_14-C3_14 | 109.7(11) | C1_18-C2_18-AI9    | 70.6(3)   |
| C4_14-C1_14-C3_14 | 109.0(10) | C9_18-C2_18-AI9    | 124.9(4)  |
| F1_14-C2_14-F3_14 | 108.5(13) | C4_18-C3_18-C2_18  | 108.3(7)  |
| F1_14-C2_14-F2_14 | 109.2(16) | C4_18-C3_18-C8_18  | 125.7(10) |
| F3_14-C2_14-F2_14 | 107.9(17) | C2_18-C3_18-C8_18  | 126.0(10) |
| F1_14-C2_14-C1_14 | 110.2(11) | C4_18-C3_18-AI9    | 71.9(5)   |
| F3_14-C2_14-C1_14 | 111.1(11) | C2_18-C3_18-AI9    | 70.9(4)   |
| F2_14-C2_14-C1_14 | 109.9(16) | C8_18-C3_18-AI9    | 122.9(11) |
| F6_14-C3_14-F4_14 | 108.5(15) | C5_18-C4_18-C3_18  | 108.3(7)  |
| F6_14-C3_14-F5_14 | 111.6(16) | C5_18-C4_18-C7_18  | 126.6(10) |
| F4_14-C3_14-F5_14 | 110.1(13) | C3_18-C4_18-C7_18  | 125.1(10) |
| F6_14-C3_14-C1_14 | 110.9(15) | C5_18-C4_18-AI9    | 71.1(4)   |
| F4_14-C3_14-C1_14 | 107.0(11) | C3_18-C4_18-AI9    | 71.0(5)   |
| F5_14-C3_14-C1_14 | 108.8(11) | C7_18-C4_18-AI9    | 122.7(9)  |
| F7_14-C4_14-F9_14 | 108.6(12) | C4_18-C5_18-C1_18  | 107.7(6)  |
| F7_14-C4_14-F8_14 | 108.3(17) | C4_18-C5_18-C6_18  | 126.1(9)  |
| F9_14-C4_14-F8_14 | 109.5(18) | C1_18-C5_18-C6_18  | 126.1(9)  |
| F7_14-C4_14-C1_14 | 110.7(10) | C4_18-C5_18-AI9    | 72.0(5)   |
| F9_14-C4_14-C1_14 | 109.7(13) | C1_18-C5_18-AI9    | 70.4(3)   |
| F8_14-C4_14-C1_14 | 110.0(16) | C6_18-C5_18-AI9    | 125.1(4)  |
| C1_15-O1_15-AI4   | 154(2)    | C5_18-C6_18-H6A_18 | 109.5     |
| O1_15-C1_15-C3_15 | 112.8(15) | C5_18-C6_18-H6B_18 | 109.5     |
| O1_15-C1_15-C2_15 | 108.5(14) | H6A_18-C6_18-      | 109.5     |
| C3_15-C1_15-C2_15 | 111.6(11) | H6B_18             | 109.5     |
| O1_15-C1_15-C4_15 | 105.7(13) | C5_18-C6_18-H6C_18 | 109.5     |
| C3_15-C1_15-C4_15 | 107.2(11) | H6A_18-C6_18-      | 109.5     |
| C2_15-C1_15-C4_15 | 111.0(12) | H6C_18             | 109.5     |
| F2_15-C2_15-F3_15 | 112.3(16) | H6B_18-C6_18-      | 109.5     |
| F2_15-C2_15-F1_15 | 106.6(15) | H6C_18             | 109.5     |
| F3_15-C2_15-F1_15 | 107.8(15) | C4_18-C7_18-H7A_18 | 109.5     |
| F2_15-C2_15-C1_15 | 109.6(14) | C4_18-C7_18-H7B_18 | 109.5     |
| F3_15-C2_15-C1_15 | 108.7(14) | H7A_18-C7_18-      | 109.5     |
| F1_15-C2_15-C1_15 | 111.8(14) | H7B_18             | 109.5     |
| F5_15-C3_15-F4_15 | 108.2(15) | C4_18-C7_18-H7C_18 | 109.5     |
| F5_15-C3_15-F6_15 | 107.0(15) | H7A_18-C7_18-      | 109.5     |
| F4_15-C3_15-F6_15 | 106.0(15) | H7C_18             | 109.5     |
| F5_15-C3_15-C1_15 | 111.2(14) | H7B_18-C7_18-      | 109.5     |
| F4_15-C3_15-C1_15 | 112.6(14) | H7C_18             | 109.5     |
| F6_15-C3_15-C1_15 | 111.5(15) | C3_18-C8_18-H8A_18 | 109.5     |
| F8_15-C4_15-F9_15 | 109.4(14) | C3_18-C8_18-H8B_18 | 109.5     |
| F8_15-C4_15-F7_15 | 107.4(15) | H8A_18-C8_18-      | 109.5     |
| F9_15-C4_15-F7_15 | 108.5(13) | H8B_18             | 109.5     |
| F8_15-C4_15-C1_15 | 113.3(14) | C3_18-C8_18-H8C_18 | 109.5     |
| F9_15-C4_15-C1_15 | 108.2(12) |                    |           |

|                    |           |                    |           |
|--------------------|-----------|--------------------|-----------|
| H8A_18-C8_18-      |           | C5_19-C6_19-H6A_19 | 109.5     |
| H8C_18             | 109.5     | C5_19-C6_19-H6B_19 | 109.5     |
| H8B_18-C8_18-      |           | H6A_19-C6_19-      | 109.5     |
| H8C_18             | 109.5     | H6B_19             | 109.5     |
| C2_18-C9_18-H9A_18 | 109.5     | C5_19-C6_19-H6C_19 | 109.5     |
| C2_18-C9_18-H9B_18 | 109.5     | H6A_19-C6_19-      | 109.5     |
| H9A_18-C9_18-      |           | H6C_19             | 109.5     |
| H9B_18             | 109.5     | H6B_19-C6_19-      | 109.5     |
| C2_18-C9_18-H9C_18 | 109.5     | H6C_19             | 109.5     |
| H9A_18-C9_18-      |           | C4_19-C7_19-H7A_19 | 109.5     |
| H9C_18             | 109.5     | C4_19-C7_19-H7B_19 | 109.5     |
| H9B_18-C9_18-      |           | H7A_19-C7_19-      | 109.5     |
| H9C_18             | 109.5     | H7B_19             | 109.5     |
| C1_18-C10_18-      |           | C4_19-C7_19-H7C_19 | 109.5     |
| H10A_18            | 109.5     | H7A_19-C7_19-      | 109.5     |
| C1_18-C10_18-      |           | H7C_19             | 109.5     |
| H10B_18            | 109.5     | H7B_19-C7_19-      | 109.5     |
| H10A_18-C10_18-    |           | H7C_19             | 109.5     |
| H10B_18            | 109.5     | C3_19-C8_19-H8A_19 | 109.5     |
| C1_18-C10_18-      |           | C3_19-C8_19-H8B_19 | 109.5     |
| H10C_18            | 109.5     | H8A_19-C8_19-      | 109.5     |
| H10A_18-C10_18-    |           | H8B_19             | 109.5     |
| H10C_18            | 109.5     | C3_19-C8_19-H8C_19 | 109.5     |
| H10B_18-C10_18-    |           | H8A_19-C8_19-      | 109.5     |
| H10C_18            | 109.5     | H8C_19             | 109.5     |
| C2_19-C1_19-C5_19  | 108.3(7)  | H8B_19-C8_19-      | 109.5     |
| C2_19-C1_19-C10_19 | 128.3(12) | H8C_19             | 109.5     |
| C5_19-C1_19-C10_19 | 123.4(12) | C2_19-C9_19-H9A_19 | 109.5     |
| C2_19-C1_19-A16    | 71.4(5)   | C2_19-C9_19-H9B_19 | 109.5     |
| C5_19-C1_19-A16    | 70.7(6)   | H9A_19-C9_19-      | 109.5     |
| C10_19-C1_19-A16   | 124.8(10) | H9B_19             | 109.5     |
| C1_19-C2_19-C3_19  | 107.7(7)  | C2_19-C9_19-H9C_19 | 109.5     |
| C1_19-C2_19-C9_19  | 126.6(11) | H9A_19-C9_19-      | 109.5     |
| C3_19-C2_19-C9_19  | 125.7(11) | H9C_19             | 109.5     |
| C1_19-C2_19-A16    | 71.4(5)   | H9B_19-C9_19-      | 109.5     |
| C3_19-C2_19-A16    | 69.9(5)   | H9C_19             | 109.5     |
| C9_19-C2_19-A16    | 123.8(11) | C1_19-C10_19-      | 109.5     |
| C2_19-C3_19-C4_19  | 108.7(7)  | H10A_19            | 109.5     |
| C2_19-C3_19-C8_19  | 126.7(9)  | C1_19-C10_19-      | 109.5     |
| C4_19-C3_19-C8_19  | 124.5(9)  | H10B_19            | 109.5     |
| C2_19-C3_19-A16    | 72.5(5)   | H10A_19-C10_19-    | 109.5     |
| C4_19-C3_19-A16    | 70.0(7)   | H10B_19            | 109.5     |
| C8_19-C3_19-A16    | 125.4(8)  | C1_19-C10_19-      | 109.5     |
| C5_19-C4_19-C3_19  | 106.6(7)  | H10C_19            | 109.5     |
| C5_19-C4_19-C7_19  | 126.9(9)  | H10A_19-C10_19-    | 109.5     |
| C3_19-C4_19-C7_19  | 126.4(9)  | H10C_19            | 109.5     |
| C5_19-C4_19-A16    | 72.5(7)   | H10B_19-C10_19-    | 109.5     |
| C3_19-C4_19-A16    | 71.5(6)   | H10C_19            | 109.5     |
| C7_19-C4_19-A16    | 121.9(12) | C2_20-C1_20-C5_20  | 106.5(8)  |
| C1_19-C5_19-C4_19  | 108.6(7)  | C2_20-C1_20-C10_20 | 129.4(11) |
| C1_19-C5_19-C6_19  | 126.9(10) | C5_20-C1_20-C10_20 | 124.0(10) |
| C4_19-C5_19-C6_19  | 124.4(10) | C2_20-C1_20-A10    | 68.9(6)   |
| C1_19-C5_19-A16    | 71.8(6)   | C5_20-C1_20-A10    | 70.6(6)   |
| C4_19-C5_19-A16    | 69.5(7)   | C10_20-C1_20-A10   | 125.7(9)  |
| C6_19-C5_19-A16    | 125.2(11) | C1_20-C2_20-C3_20  | 109.5(8)  |

|                    |           |                    |           |
|--------------------|-----------|--------------------|-----------|
| C1_20-C2_20-C9_20  | 123.3(11) | H9A_20-C9_20-      | 109.5     |
| C3_20-C2_20-C9_20  | 127.1(12) | H9C_20             |           |
| C1_20-C2_20-AI10   | 74.6(6)   | H9B_20-C9_20-      | 109.5     |
| C3_20-C2_20-AI10   | 69.3(6)   | H9C_20             |           |
| C9_20-C2_20-AI10   | 125.8(10) | C1_20-C10_20-      | 109.5     |
| C4_20-C3_20-C2_20  | 106.4(7)  | H10A_20            |           |
| C4_20-C3_20-C8_20  | 124.5(9)  | C1_20-C10_20-      | 109.5     |
| C2_20-C3_20-C8_20  | 129.1(10) | H10B_20            |           |
| C4_20-C3_20-AI10   | 71.4(7)   | H10A_20-C10_20-    | 109.5     |
| C2_20-C3_20-AI10   | 72.0(6)   | H10B_20            |           |
| C8_20-C3_20-AI10   | 122.0(10) | C1_20-C10_20-      | 109.5     |
| C5_20-C4_20-C3_20  | 108.1(7)  | H10C_20            |           |
| C5_20-C4_20-C7_20  | 124.5(7)  | H10A_20-C10_20-    | 109.5     |
| C3_20-C4_20-C7_20  | 127.2(8)  | H10C_20            |           |
| C5_20-C4_20-AI10   | 74.3(6)   | H10B_20-C10_20-    | 109.5     |
| C3_20-C4_20-AI10   | 70.2(7)   | H10C_20            |           |
| C7_20-C4_20-AI10   | 124.9(8)  | C5_21-C1_21-C2_21  | 104.8(8)  |
| C4_20-C5_20-C1_20  | 109.4(7)  | C5_21-C1_21-C10_21 | 129.3(11) |
| C4_20-C5_20-C6_20  | 127.9(8)  | C2_21-C1_21-C10_21 | 125.9(11) |
| C1_20-C5_20-C6_20  | 122.6(8)  | C5_21-C1_21-AI7    | 74.3(7)   |
| C4_20-C5_20-AI10   | 68.8(6)   | C2_21-C1_21-AI7    | 68.4(6)   |
| C1_20-C5_20-AI10   | 72.4(6)   | C10_21-C1_21-AI7   | 121.1(9)  |
| C6_20-C5_20-AI10   | 126.9(8)  | C3_21-C2_21-C1_21  | 110.0(8)  |
| C5_20-C6_20-H6A_20 | 109.5     | C3_21-C2_21-C9_21  | 127.4(9)  |
| C5_20-C6_20-H6B_20 | 109.5     | C1_21-C2_21-C9_21  | 122.3(9)  |
| H6A_20-C6_20-      | 109.5     | C3_21-C2_21-AI7    | 74.7(6)   |
| H6B_20             |           | C1_21-C2_21-AI7    | 72.9(6)   |
| C5_20-C6_20-H6C_20 | 109.5     | C9_21-C2_21-AI7    | 124.1(9)  |
| H6A_20-C6_20-      | 109.5     | C2_21-C3_21-C4_21  | 107.5(8)  |
| H6C_20             |           | C2_21-C3_21-C8_21  | 123.9(9)  |
| H6B_20-C6_20-      | 109.5     | C4_21-C3_21-C8_21  | 128.6(9)  |
| H6C_20             |           | C2_21-C3_21-AI7    | 67.7(5)   |
| C4_20-C7_20-H7A_20 | 109.5     | C4_21-C3_21-AI7    | 73.7(7)   |
| C4_20-C7_20-H7B_20 | 109.5     | C8_21-C3_21-AI7    | 125.2(10) |
| H7A_20-C7_20-      | 109.5     | C3_21-C4_21-C5_21  | 106.9(8)  |
| H7B_20             |           | C3_21-C4_21-C7_21  | 123.7(10) |
| C4_20-C7_20-H7C_20 | 109.5     | C5_21-C4_21-C7_21  | 128.6(11) |
| H7A_20-C7_20-      | 109.5     | C3_21-C4_21-AI7    | 69.7(7)   |
| H7C_20             |           | C5_21-C4_21-AI7    | 71.2(7)   |
| H7B_20-C7_20-      | 109.5     | C7_21-C4_21-AI7    | 131.9(11) |
| H7C_20             |           | C1_21-C5_21-C4_21  | 110.8(8)  |
| C3_20-C8_20-H8A_20 | 109.5     | C1_21-C5_21-C6_21  | 127.3(12) |
| C3_20-C8_20-H8B_20 | 109.5     | C4_21-C5_21-C6_21  | 122.0(12) |
| H8A_20-C8_20-      | 109.5     | C1_21-C5_21-AI7    | 69.0(7)   |
| H8B_20             |           | C4_21-C5_21-AI7    | 72.4(8)   |
| C3_20-C8_20-H8C_20 | 109.5     | C6_21-C5_21-AI7    | 125.5(10) |
| H8A_20-C8_20-      | 109.5     | C5_21-C6_21-H6A_21 | 109.5     |
| H8C_20             |           | C5_21-C6_21-H6B_21 | 109.5     |
| H8B_20-C8_20-      | 109.5     | H6A_21-C6_21-      | 109.5     |
| H8C_20             |           | H6B_21             |           |
| C2_20-C9_20-H9A_20 | 109.5     | C5_21-C6_21-H6C_21 | 109.5     |
| C2_20-C9_20-H9B_20 | 109.5     | H6A_21-C6_21-      | 109.5     |
| H9A_20-C9_20-      | 109.5     | H6C_21             |           |
| H9B_20             |           | H6B_21-C6_21-      | 109.5     |
| C2_20-C9_20-H9C_20 | 109.5     | H6C_21             |           |

|                    |           |                    |           |
|--------------------|-----------|--------------------|-----------|
| C4_21-C7_21-H7A_21 | 109.5     | C2_22-C3_22-AI11   | 69.0(6)   |
| C4_21-C7_21-H7B_21 | 109.5     | C8_22-C3_22-AI11   | 121.8(11) |
| H7A_21-C7_21-      |           | C3_22-C4_22-C5_22  | 108.7(8)  |
| H7B_21             | 109.5     | C3_22-C4_22-C7_22  | 127.3(10) |
| C4_21-C7_21-H7C_21 | 109.5     | C5_22-C4_22-C7_22  | 124.0(10) |
| H7A_21-C7_21-      |           | C3_22-C4_22-AI11   | 67.5(9)   |
| H7C_21             | 109.5     | C5_22-C4_22-AI11   | 73.8(10)  |
| H7B_21-C7_21-      |           | C7_22-C4_22-AI11   | 127.3(14) |
| H7C_21             | 109.5     | C1_22-C5_22-C4_22  | 107.4(9)  |
| C3_21-C8_21-H8A_21 | 109.5     | C1_22-C5_22-C6_22  | 124.7(11) |
| C3_21-C8_21-H8B_21 | 109.5     | C4_22-C5_22-C6_22  | 127.9(11) |
| H8A_21-C8_21-      |           | C1_22-C5_22-AI11   | 67.7(7)   |
| H8B_21             | 109.5     | C4_22-C5_22-AI11   | 70.7(10)  |
| C3_21-C8_21-H8C_21 | 109.5     | C6_22-C5_22-AI11   | 127.7(13) |
| H8A_21-C8_21-      |           | C5_22-C6_22-H6A_22 | 109.5     |
| H8C_21             | 109.5     | C5_22-C6_22-H6B_22 | 109.5     |
| H8B_21-C8_21-      |           | H6A_22-C6_22-      |           |
| H8C_21             | 109.5     | H6B_22             | 109.5     |
| C2_21-C9_21-H9A_21 | 109.5     | C5_22-C6_22-H6C_22 | 109.5     |
| C2_21-C9_21-H9B_21 | 109.5     | H6A_22-C6_22-      |           |
| H9A_21-C9_21-      |           | H6C_22             | 109.5     |
| H9B_21             | 109.5     | H6B_22-C6_22-      |           |
| C2_21-C9_21-H9C_21 | 109.5     | H6C_22             | 109.5     |
| H9A_21-C9_21-      |           | C4_22-C7_22-H7A_22 | 109.5     |
| H9C_21             | 109.5     | C4_22-C7_22-H7B_22 | 109.5     |
| H9B_21-C9_21-      |           | H7A_22-C7_22-      |           |
| H9C_21             | 109.5     | H7B_22             | 109.5     |
| C1_21-C10_21-      |           | C4_22-C7_22-H7C_22 | 109.5     |
| H10A_21            | 109.5     | H7A_22-C7_22-      |           |
| C1_21-C10_21-      |           | H7C_22             | 109.5     |
| H10B_21            | 109.5     | H7B_22-C7_22-      |           |
| H10A_21-C10_21-    |           | H7C_22             | 109.5     |
| H10B_21            | 109.5     | C3_22-C8_22-H8A_22 | 109.5     |
| C1_21-C10_21-      |           | C3_22-C8_22-H8B_22 | 109.5     |
| H10C_21            | 109.5     | H8A_22-C8_22-      |           |
| H10A_21-C10_21-    |           | H8B_22             | 109.5     |
| H10C_21            | 109.5     | C3_22-C8_22-H8C_22 | 109.5     |
| H10B_21-C10_21-    |           | H8A_22-C8_22-      |           |
| H10C_21            | 109.5     | H8C_22             | 109.5     |
| C5_22-C1_22-C2_22  | 108.6(8)  | H8B_22-C8_22-      |           |
| C5_22-C1_22-C10_22 | 127.0(10) | H8C_22             | 109.5     |
| C2_22-C1_22-C10_22 | 124.3(10) | C2_22-C9_22-H9A_22 | 109.5     |
| C5_22-C1_22-AI11   | 76.5(8)   | C2_22-C9_22-H9B_22 | 109.5     |
| C2_22-C1_22-AI11   | 67.8(6)   | H9A_22-C9_22-      |           |
| C10_22-C1_22-AI11  | 125.2(10) | H9B_22             | 109.5     |
| C1_22-C2_22-C3_22  | 107.5(8)  | C2_22-C9_22-H9C_22 | 109.5     |
| C1_22-C2_22-C9_22  | 127.3(9)  | H9A_22-C9_22-      |           |
| C3_22-C2_22-C9_22  | 124.9(10) | H9C_22             | 109.5     |
| C1_22-C2_22-AI11   | 74.4(6)   | H9B_22-C9_22-      |           |
| C3_22-C2_22-AI11   | 72.8(7)   | H9C_22             | 109.5     |
| C9_22-C2_22-AI11   | 123.3(10) | C1_22-C10_22-      |           |
| C4_22-C3_22-C2_22  | 107.8(8)  | H10A_22            | 109.5     |
| C4_22-C3_22-C8_22  | 123.8(10) | C1_22-C10_22-      |           |
| C2_22-C3_22-C8_22  | 128.4(11) | H10B_22            | 109.5     |
| C4_22-C3_22-AI11   | 76.0(10)  |                    |           |



|                            |           |                            |           |
|----------------------------|-----------|----------------------------|-----------|
| H10A_22-C10_22-<br>H10B_22 | 109.5     | H7B_23-C7_23-<br>H7C_23    | 109.5     |
| C1_22-C10_22-<br>H10C_22   | 109.5     | C3_23-C8_23-H8A_23         | 109.5     |
| H10A_22-C10_22-<br>H10C_22 | 109.5     | C3_23-C8_23-H8B_23         | 109.5     |
| H10B_22-C10_22-<br>H10C_22 | 109.5     | H8A_23-C8_23-<br>H8B_23    | 109.5     |
| C2_23-C1_23-C5_23          | 108.3(8)  | C3_23-C8_23-H8C_23         | 109.5     |
| C2_23-C1_23-C10_23         | 125.5(10) | H8A_23-C8_23-<br>H8C_23    | 109.5     |
| C5_23-C1_23-C10_23         | 126.0(10) | H8B_23-C8_23-<br>H8C_23    | 109.5     |
| C2_23-C1_23-AI8            | 76.0(7)   | C2_23-C9_23-H9A_23         | 109.5     |
| C5_23-C1_23-AI8            | 72.9(11)  | C2_23-C9_23-H9B_23         | 109.5     |
| C10_23-C1_23-AI8           | 120.5(12) | H9A_23-C9_23-<br>H9B_23    | 109.5     |
| C1_23-C2_23-C3_23          | 107.8(8)  | C2_23-C9_23-H9C_23         | 109.5     |
| C1_23-C2_23-C9_23          | 124.6(9)  | H9A_23-C9_23-<br>H9C_23    | 109.5     |
| C3_23-C2_23-C9_23          | 127.4(10) | H9B_23-C9_23-<br>H9C_23    | 109.5     |
| C1_23-C2_23-AI8            | 65.9(6)   | C1_23-C10_23-<br>H10A_23   | 109.5     |
| C3_23-C2_23-AI8            | 75.4(6)   | C1_23-C10_23-<br>H10B_23   | 109.5     |
| C9_23-C2_23-AI8            | 127.3(11) | H10A_23-C10_23-<br>H10B_23 | 109.5     |
| C2_23-C3_23-C4_23          | 108.0(8)  | C1_23-C10_23-<br>H10C_23   | 109.5     |
| C2_23-C3_23-C8_23          | 125.8(10) | H10A_23-C10_23-<br>H10C_23 | 109.5     |
| C4_23-C3_23-C8_23          | 126.1(10) | H10B_23-C10_23-<br>H10C_23 | 109.5     |
| C2_23-C3_23-AI8            | 68.1(6)   | C1_17-O1_17-AI4            | 148(2)    |
| C4_23-C3_23-AI8            | 70.0(8)   | O1_17-C1_17-C3_17          | 114.1(15) |
| C8_23-C3_23-AI8            | 130.6(10) | O1_17-C1_17-C4_17          | 109.2(13) |
| C5_23-C4_23-C3_23          | 107.9(9)  | C3_17-C1_17-C4_17          | 108.9(11) |
| C5_23-C4_23-C7_23          | 129.2(12) | O1_17-C1_17-C2_17          | 108.3(14) |
| C3_23-C4_23-C7_23          | 122.8(12) | C3_17-C1_17-C2_17          | 109.8(11) |
| C5_23-C4_23-AI8            | 67.1(11)  | C4_17-C1_17-C2_17          | 106.1(11) |
| C3_23-C4_23-AI8            | 73.7(8)   | F3_17-C2_17-F2_17          | 104.3(13) |
| C7_23-C4_23-AI8            | 125.0(13) | F3_17-C2_17-F1_17          | 112.5(14) |
| C4_23-C5_23-C1_23          | 107.8(9)  | F2_17-C2_17-F1_17          | 113.1(14) |
| C4_23-C5_23-C6_23          | 125.3(11) | F3_17-C2_17-C1_17          | 111.4(12) |
| C1_23-C5_23-C6_23          | 126.6(11) | F2_17-C2_17-C1_17          | 109.6(12) |
| C4_23-C5_23-AI8            | 75.7(11)  | F1_17-C2_17-C1_17          | 106.0(12) |
| C1_23-C5_23-AI8            | 67.8(10)  | F4_17-C3_17-F6_17          | 105.0(13) |
| C6_23-C5_23-AI8            | 118.0(16) | F4_17-C3_17-F5_17          | 106.5(14) |
| C5_23-C6_23-H6A_23         | 109.5     | F6_17-C3_17-F5_17          | 112.2(14) |
| C5_23-C6_23-H6B_23         | 109.5     | F4_17-C3_17-C1_17          | 113.4(12) |
| H6A_23-C6_23-<br>H6B_23    | 109.5     | F6_17-C3_17-C1_17          | 113.4(12) |
| C5_23-C6_23-H6C_23         | 109.5     | F5_17-C3_17-C1_17          | 106.3(12) |
| H6A_23-C6_23-<br>H6C_23    | 109.5     | F8_17-C4_17-F9_17          | 108.5(15) |
| H6B_23-C6_23-<br>H6C_23    | 109.5     | F8_17-C4_17-F7_17          | 107.7(16) |
| C4_23-C7_23-H7A_23         | 109.5     | F9_17-C4_17-F7_17          | 106.0(16) |
| C4_23-C7_23-H7B_23         | 109.5     | F8_17-C4_17-C1_17          | 112.5(13) |
| H7A_23-C7_23-<br>H7B_23    | 109.5     |                            |           |
| C4_23-C7_23-H7C_23         | 109.5     |                            |           |
| H7A_23-C7_23-<br>H7C_23    | 109.5     |                            |           |

|                    |           |                    |           |
|--------------------|-----------|--------------------|-----------|
| F9_17-C4_17-C1_17  | 112.7(14) | C4_24-C5_24-AI3    | 70.97(16) |
| F7_17-C4_17-C1_17  | 109.1(13) | C6_24-C5_24-AI3    | 128.0(2)  |
| C1_26-O1_26-AI4    | 153(4)    | C5_24-C6_24-H6A_24 | 109.5     |
| O1_26-C1_26-C4_26  | 110.4(19) | C5_24-C6_24-H6B_24 | 109.5     |
| O1_26-C1_26-C2_26  | 110(2)    | H6A_24-C6_24-      | 109.5     |
| C4_26-C1_26-C2_26  | 113.5(15) | H6B_24             | 109.5     |
| O1_26-C1_26-C3_26  | 109(2)    | C5_24-C6_24-H6C_24 | 109.5     |
| C4_26-C1_26-C3_26  | 108.0(14) | H6A_24-C6_24-      | 109.5     |
| C2_26-C1_26-C3_26  | 104.8(14) | H6C_24             | 109.5     |
| F1_26-C2_26-F2_26  | 110.4(19) | H6B_24-C6_24-      | 109.5     |
| F1_26-C2_26-F3_26  | 105(2)    | H6C_24             | 109.5     |
| F2_26-C2_26-F3_26  | 110(2)    | C4_24-C7_24-H7A_24 | 109.5     |
| F1_26-C2_26-C1_26  | 114.7(18) | C4_24-C7_24-H7B_24 | 109.5     |
| F2_26-C2_26-C1_26  | 110.6(17) | H7A_24-C7_24-      | 109.5     |
| F3_26-C2_26-C1_26  | 106.0(18) | H7B_24             | 109.5     |
| F6_26-C3_26-F4_26  | 106.2(19) | C4_24-C7_24-H7C_24 | 109.5     |
| F6_26-C3_26-F5_26  | 107(2)    | H7A_24-C7_24-      | 109.5     |
| F4_26-C3_26-F5_26  | 112(2)    | H7C_24             | 109.5     |
| F6_26-C3_26-C1_26  | 110.5(19) | H7B_24-C7_24-      | 109.5     |
| F4_26-C3_26-C1_26  | 112.6(18) | H7C_24             | 109.5     |
| F5_26-C3_26-C1_26  | 107.9(17) | C3_24-C8_24-H8A_24 | 109.5     |
| F9_26-C4_26-F8_26  | 107.7(19) | C3_24-C8_24-H8B_24 | 109.5     |
| F9_26-C4_26-F7_26  | 110(2)    | H8A_24-C8_24-      | 109.5     |
| F8_26-C4_26-F7_26  | 103.4(19) | H8B_24             | 109.5     |
| F9_26-C4_26-C1_26  | 116.8(19) | C3_24-C8_24-H8C_24 | 109.5     |
| F8_26-C4_26-C1_26  | 113.6(19) | H8A_24-C8_24-      | 109.5     |
| F7_26-C4_26-C1_26  | 104.7(16) | H8C_24             | 109.5     |
| C2_24-C1_24-C5_24  | 107.1(2)  | H8B_24-C8_24-      | 109.5     |
| C2_24-C1_24-C10_24 | 126.6(3)  | H8C_24             | 109.5     |
| C5_24-C1_24-C10_24 | 126.3(3)  | C2_24-C9_24-H9A_24 | 109.5     |
| C2_24-C1_24-AI3    | 71.24(14) | C2_24-C9_24-H9B_24 | 109.5     |
| C5_24-C1_24-AI3    | 70.08(15) | H9A_24-C9_24-      | 109.5     |
| C10_24-C1_24-AI3   | 125.3(2)  | H9B_24             | 109.5     |
| C1_24-C2_24-C3_24  | 108.9(2)  | C2_24-C9_24-H9C_24 | 109.5     |
| C1_24-C2_24-C9_24  | 125.8(3)  | H9A_24-C9_24-      | 109.5     |
| C3_24-C2_24-C9_24  | 125.4(2)  | H9C_24             | 109.5     |
| C1_24-C2_24-AI3    | 71.84(15) | H9B_24-C9_24-      | 109.5     |
| C3_24-C2_24-AI3    | 71.24(14) | H9C_24             | 109.5     |
| C9_24-C2_24-AI3    | 123.3(2)  | C1_24-C10_24-      | 109.5     |
| C4_24-C3_24-C2_24  | 108.1(2)  | H10A_24            | 109.5     |
| C4_24-C3_24-C8_24  | 127.1(3)  | C1_24-C10_24-      | 109.5     |
| C2_24-C3_24-C8_24  | 124.7(3)  | H10B_24            | 109.5     |
| C4_24-C3_24-AI3    | 70.62(15) | H10A_24-C10_24-    | 109.5     |
| C2_24-C3_24-AI3    | 71.53(14) | H10B_24            | 109.5     |
| C8_24-C3_24-AI3    | 124.2(2)  | C1_24-C10_24-      | 109.5     |
| C3_24-C4_24-C5_24  | 107.7(2)  | H10C_24            | 109.5     |
| C3_24-C4_24-C7_24  | 126.5(3)  | H10A_24-C10_24-    | 109.5     |
| C5_24-C4_24-C7_24  | 125.8(3)  | H10C_24            | 109.5     |
| C3_24-C4_24-AI3    | 72.23(15) | H10B_24-C10_24-    | 109.5     |
| C5_24-C4_24-AI3    | 71.14(16) | H10C_24            | 109.5     |
| C7_24-C4_24-AI3    | 123.8(2)  | C5_27-C1_27-C2_27  | 109.0(3)  |
| C1_24-C5_24-C4_24  | 108.2(2)  | C5_27-C1_27-C10_27 | 125.9(3)  |
| C1_24-C5_24-C6_24  | 126.4(3)  | C2_27-C1_27-C10_27 | 124.9(3)  |
| C4_24-C5_24-C6_24  | 125.1(3)  | C5_27-C1_27-AI2    | 71.45(19) |
| C1_24-C5_24-AI3    | 72.37(15) | C2_27-C1_27-AI2    | 71.48(17) |

|                    |           |                    |           |
|--------------------|-----------|--------------------|-----------|
| C10_27-C1_27-AI2   | 126.5(3)  | H9A_27-C9_27-      | 109.5     |
| C3_27-C2_27-C1_27  | 108.7(3)  | H9B_27             |           |
| C3_27-C2_27-C9_27  | 127.5(3)  | C2_27-C9_27-H9C_27 | 109.5     |
| C1_27-C2_27-C9_27  | 123.5(3)  | H9A_27-C9_27-      | 109.5     |
| C3_27-C2_27-AI2    | 71.78(18) | H9C_27             |           |
| C1_27-C2_27-AI2    | 71.14(18) | H9B_27-C9_27-      | 109.5     |
| C9_27-C2_27-AI2    | 127.8(2)  | H9C_27             |           |
| C2_27-C3_27-C4_27  | 106.7(3)  | C1_27-C10_27-      | 109.5     |
| C2_27-C3_27-C8_27  | 127.1(4)  | H10A_27            |           |
| C4_27-C3_27-C8_27  | 126.2(4)  | C1_27-C10_27-      | 109.5     |
| C2_27-C3_27-AI2    | 71.34(19) | H10B_27            |           |
| C4_27-C3_27-AI2    | 70.47(19) | H10A_27-C10_27-    | 109.5     |
| C8_27-C3_27-AI2    | 125.2(3)  | H10B_27            |           |
| C5_27-C4_27-C3_27  | 108.5(3)  | C1_27-C10_27-      | 109.5     |
| C5_27-C4_27-C7_27  | 125.4(4)  | H10C_27            |           |
| C3_27-C4_27-C7_27  | 126.1(4)  | H10A_27-C10_27-    | 109.5     |
| C5_27-C4_27-AI2    | 71.37(19) | H10C_27            |           |
| C3_27-C4_27-AI2    | 71.41(18) | H10B_27-C10_27-    | 109.5     |
| C7_27-C4_27-AI2    | 122.6(3)  | H10C_27            |           |
| C1_27-C5_27-C4_27  | 107.1(3)  | C2_28-C1_28-C5_28  | 107.9(3)  |
| C1_27-C5_27-C6_27  | 126.5(4)  | C2_28-C1_28-C10_28 | 124.8(4)  |
| C4_27-C5_27-C6_27  | 126.3(3)  | C5_28-C1_28-C10_28 | 127.0(3)  |
| C1_27-C5_27-AI2    | 71.43(18) | C2_28-C1_28-AI1    | 70.83(17) |
| C4_27-C5_27-AI2    | 71.17(19) | C5_28-C1_28-AI1    | 72.24(18) |
| C6_27-C5_27-AI2    | 124.6(3)  | C10_28-C1_28-AI1   | 127.9(3)  |
| C5_27-C6_27-H6A_27 | 109.5     | C1_28-C2_28-C3_28  | 107.7(3)  |
| C5_27-C6_27-H6B_27 | 109.5     | C1_28-C2_28-C9_28  | 124.9(4)  |
| H6A_27-C6_27-      | 109.5     | C3_28-C2_28-C9_28  | 127.2(4)  |
| H6B_27             |           | C1_28-C2_28-AI1    | 71.44(18) |
| C5_27-C6_27-H6C_27 | 109.5     | C3_28-C2_28-AI1    | 71.65(18) |
| H6A_27-C6_27-      | 109.5     | C9_28-C2_28-AI1    | 125.2(3)  |
| H6C_27             |           | C4_28-C3_28-C2_28  | 108.0(3)  |
| H6B_27-C6_27-      | 109.5     | C4_28-C3_28-C8_28  | 125.7(4)  |
| H6C_27             |           | C2_28-C3_28-C8_28  | 126.2(4)  |
| C4_27-C7_27-H7A_27 | 109.5     | C4_28-C3_28-AI1    | 72.0(2)   |
| C4_27-C7_27-H7B_27 | 109.5     | C2_28-C3_28-AI1    | 70.5(2)   |
| H7A_27-C7_27-      | 109.5     | C8_28-C3_28-AI1    | 123.7(3)  |
| H7B_27             |           | C3_28-C4_28-C5_28  | 108.2(3)  |
| C4_27-C7_27-H7C_27 | 109.5     | C3_28-C4_28-C7_28  | 126.1(4)  |
| H7A_27-C7_27-      | 109.5     | C5_28-C4_28-C7_28  | 125.7(4)  |
| H7C_27             |           | C3_28-C4_28-AI1    | 70.7(2)   |
| H7B_27-C7_27-      | 109.5     | C5_28-C4_28-AI1    | 71.6(2)   |
| H7C_27             |           | C7_28-C4_28-AI1    | 124.2(3)  |
| C3_27-C8_27-H8A_27 | 109.5     | C4_28-C5_28-C1_28  | 108.1(3)  |
| C3_27-C8_27-H8B_27 | 109.5     | C4_28-C5_28-C6_28  | 126.2(4)  |
| H8A_27-C8_27-      | 109.5     | C1_28-C5_28-C6_28  | 125.7(4)  |
| H8B_27             |           | C4_28-C5_28-AI1    | 71.38(18) |
| C3_27-C8_27-H8C_27 | 109.5     | C1_28-C5_28-AI1    | 70.26(17) |
| H8A_27-C8_27-      | 109.5     | C6_28-C5_28-AI1    | 125.3(3)  |
| H8C_27             |           | C5_28-C6_28-H6A_28 | 109.5     |
| H8B_27-C8_27-      | 109.5     | C5_28-C6_28-H6B_28 | 109.5     |
| H8C_27             |           | H6A_28-C6_28-      | 109.5     |
| C2_27-C9_27-H9A_27 | 109.5     | H6B_28             |           |
| C2_27-C9_27-H9B_27 | 109.5     | C5_28-C6_28-H6C_28 | 109.5     |

|                    |           |                   |           |
|--------------------|-----------|-------------------|-----------|
| H6A_28-C6_28-      | 109.5     | C6_30-C5_30-C4_30 | 119.9(9)  |
| H6C_28             |           | C6_30-C5_30-H5_30 | 120.1     |
| H6B_28-C6_28-      | 109.5     | C4_30-C5_30-H5_30 | 120.1     |
| H6C_28             |           | C1_30-C6_30-C5_30 | 117.2(10) |
| C4_28-C7_28-H7A_28 | 109.5     | C1_30-C6_30-H6_30 | 121.4     |
| C4_28-C7_28-H7B_28 | 109.5     | C5_30-C6_30-H6_30 | 121.4     |
| H7A_28-C7_28-      | 109.5     | C6_16-C1_16-C2_16 | 125.5(11) |
| H7B_28             |           | C6_16-C1_16-F1_16 | 119.6(11) |
| C4_28-C7_28-H7C_28 | 109.5     | C2_16-C1_16-F1_16 | 114.8(10) |
| H7A_28-C7_28-      | 109.5     | C3_16-C2_16-C1_16 | 123.3(12) |
| H7C_28             |           | C3_16-C2_16-H2_16 | 118.3     |
| H7B_28-C7_28-      | 109.5     | C1_16-C2_16-H2_16 | 118.3     |
| H7C_28             |           | C2_16-C3_16-C4_16 | 123.0(12) |
| C3_28-C8_28-H8A_28 | 109.5     | C2_16-C3_16-F2_16 | 133.0(12) |
| C3_28-C8_28-H8B_28 | 109.5     | C4_16-C3_16-F2_16 | 103.9(12) |
| H8A_28-C8_28-      | 109.5     | C3_16-C4_16-C5_16 | 115.1(11) |
| H8B_28             |           | C3_16-C4_16-H4_16 | 122.5     |
| C3_28-C8_28-H8C_28 | 109.5     | C5_16-C4_16-H4_16 | 122.5     |
| H8A_28-C8_28-      | 109.5     | C4_16-C5_16-C6_16 | 116.3(10) |
| H8C_28             |           | C4_16-C5_16-H5_16 | 121.8     |
| H8B_28-C8_28-      | 109.5     | C6_16-C5_16-H5_16 | 121.8     |
| H8C_28             |           | C1_16-C6_16-C5_16 | 114.6(11) |
| C2_28-C9_28-H9A_28 | 109.5     | C1_16-C6_16-H6_16 | 122.7     |
| C2_28-C9_28-H9B_28 | 109.5     | C5_16-C6_16-H6_16 | 122.7     |
| H9A_28-C9_28-      | 109.5     | C6_31-C1_31-F1_31 | 114.3(13) |
| H9B_28             |           | C6_31-C1_31-C2_31 | 127.8(13) |
| C2_28-C9_28-H9C_28 | 109.5     | F1_31-C1_31-C2_31 | 117.6(13) |
| H9A_28-C9_28-      | 109.5     | C1_31-C2_31-C3_31 | 114.2(14) |
| H9C_28             |           | C1_31-C2_31-H2_31 | 122.9     |
| H9B_28-C9_28-      | 109.5     | C3_31-C2_31-H2_31 | 122.9     |
| H9C_28             |           | C4_31-C3_31-F2_31 | 114.4(13) |
| C1_28-C10_28-      | 109.5     | C4_31-C3_31-C2_31 | 126.5(14) |
| H10A_28            |           | F2_31-C3_31-C2_31 | 119.1(13) |
| C1_28-C10_28-      | 109.5     | C3_31-C4_31-C5_31 | 118.3(14) |
| H10B_28            |           | C3_31-C4_31-H4_31 | 120.9     |
| H10A_28-C10_28-    | 109.5     | C5_31-C4_31-H4_31 | 120.9     |
| H10B_28            |           | C6_31-C5_31-C4_31 | 116.8(13) |
| C1_28-C10_28-      | 109.5     | C6_31-C5_31-H5_31 | 121.6     |
| H10C_28            |           | C4_31-C5_31-H5_31 | 121.6     |
| H10A_28-C10_28-    | 109.5     | C1_31-C6_31-C5_31 | 116.1(13) |
| H10C_28            |           | C1_31-C6_31-H6_31 | 121.9     |
| H10B_28-C10_28-    | 109.5     | C5_31-C6_31-H6_31 | 121.9     |
| H10C_28            |           | C1_32-O1_32-AI5   | 155(3)    |
| C6_30-C1_30-C2_30  | 123.7(9)  | O1_32-C1_32-C3_32 | 108.7(16) |
| C6_30-C1_30-F1_30  | 118.6(10) | O1_32-C1_32-C2_32 | 109.3(17) |
| C2_30-C1_30-F1_30  | 117.6(9)  | C3_32-C1_32-C2_32 | 111.7(12) |
| C3_30-C2_30-C1_30  | 117.5(9)  | O1_32-C1_32-C4_32 | 111.5(17) |
| C3_30-C2_30-H2_30  | 121.2     | C3_32-C1_32-C4_32 | 108.5(12) |
| C1_30-C2_30-H2_30  | 121.2     | C2_32-C1_32-C4_32 | 107.2(12) |
| C4_30-C3_30-C2_30  | 125.0(9)  | F2_32-C2_32-F3_32 | 109.1(18) |
| C4_30-C3_30-F2_30  | 114.2(8)  | F2_32-C2_32-F1_32 | 106.7(18) |
| C2_30-C3_30-F2_30  | 120.7(8)  | F3_32-C2_32-F1_32 | 107.5(16) |
| C3_30-C4_30-C5_30  | 116.6(9)  | F2_32-C2_32-C1_32 | 110.0(17) |
| C3_30-C4_30-H4_30  | 121.7     | F3_32-C2_32-C1_32 | 112.4(13) |
| C5_30-C4_30-H4_30  | 121.7     | F1_32-C2_32-C1_32 | 111.1(14) |

|                   |           |                   |           |
|-------------------|-----------|-------------------|-----------|
| F5_32-C3_32-F6_32 | 109.3(18) | F4_35-C3_35-C1_35 | 110.9(14) |
| F5_32-C3_32-F4_32 | 108.2(16) | F9_35-C4_35-F8_35 | 108.5(18) |
| F6_32-C3_32-F4_32 | 104.5(16) | F9_35-C4_35-F7_35 | 105.4(17) |
| F5_32-C3_32-C1_32 | 112.1(17) | F8_35-C4_35-F7_35 | 108.7(17) |
| F6_32-C3_32-C1_32 | 111.2(15) | F9_35-C4_35-C1_35 | 109.6(15) |
| F4_32-C3_32-C1_32 | 111.2(13) | F8_35-C4_35-C1_35 | 112.4(16) |
| F7_32-C4_32-F9_32 | 108.2(16) | F7_35-C4_35-C1_35 | 111.9(15) |
| F7_32-C4_32-F8_32 | 108.4(18) | C1_36-O1_36-AI4   | 148(3)    |
| F9_32-C4_32-F8_32 | 104.6(17) | O1_36-C1_36-C4_36 | 112.5(18) |
| F7_32-C4_32-C1_32 | 111.0(14) | O1_36-C1_36-C2_36 | 110.7(19) |
| F9_32-C4_32-C1_32 | 110.6(13) | C4_36-C1_36-C2_36 | 109.2(14) |
| F8_32-C4_32-C1_32 | 113.8(17) | O1_36-C1_36-C3_36 | 107.9(18) |
| C1_33-O1_33-AI4   | 147(2)    | C4_36-C1_36-C3_36 | 109.9(14) |
| O1_33-C1_33-C2_33 | 112.6(15) | C2_36-C1_36-C3_36 | 106.4(14) |
| O1_33-C1_33-C3_33 | 110.1(16) | F3_36-C2_36-F1_36 | 105.3(19) |
| C2_33-C1_33-C3_33 | 112.2(13) | F3_36-C2_36-F2_36 | 110(2)    |
| O1_33-C1_33-C4_33 | 106.7(15) | F1_36-C2_36-F2_36 | 110(2)    |
| C2_33-C1_33-C4_33 | 108.3(13) | F3_36-C2_36-C1_36 | 112.2(17) |
| C3_33-C1_33-C4_33 | 106.7(12) | F1_36-C2_36-C1_36 | 111.8(18) |
| F3_33-C2_33-F1_33 | 107.1(17) | F2_36-C2_36-C1_36 | 107.6(17) |
| F3_33-C2_33-F2_33 | 106.4(17) | F4_36-C3_36-F6_36 | 107.1(19) |
| F1_33-C2_33-F2_33 | 108.8(18) | F4_36-C3_36-F5_36 | 109(2)    |
| F3_33-C2_33-C1_33 | 110.6(15) | F6_36-C3_36-F5_36 | 107(2)    |
| F1_33-C2_33-C1_33 | 112.9(16) | F4_36-C3_36-C1_36 | 114.6(19) |
| F2_33-C2_33-C1_33 | 110.7(16) | F6_36-C3_36-C1_36 | 111.3(18) |
| F4_33-C3_33-F6_33 | 108.0(17) | F5_36-C3_36-C1_36 | 108.0(17) |
| F4_33-C3_33-F5_33 | 106.2(18) | F9_36-C4_36-F7_36 | 105.9(19) |
| F6_33-C3_33-F5_33 | 105.8(16) | F9_36-C4_36-F8_36 | 109.6(19) |
| F4_33-C3_33-C1_33 | 109.9(15) | F7_36-C4_36-F8_36 | 105.0(19) |
| F6_33-C3_33-C1_33 | 115.8(16) | F9_36-C4_36-C1_36 | 113.6(17) |
| F5_33-C3_33-C1_33 | 110.5(15) | F7_36-C4_36-C1_36 | 110.4(17) |
| F9_33-C4_33-F8_33 | 109.3(18) | F8_36-C4_36-C1_36 | 111.9(17) |
| F9_33-C4_33-F7_33 | 109.0(18) | C6_37-C1_37-C2_37 | 124.7(17) |
| F8_33-C4_33-F7_33 | 110(2)    | C6_37-C1_37-F1_37 | 118.4(18) |
| F9_33-C4_33-C1_33 | 112.6(16) | C2_37-C1_37-F1_37 | 116.9(17) |
| F8_33-C4_33-C1_33 | 111.4(17) | C1_37-C2_37-C3_37 | 118.2(18) |
| F7_33-C4_33-C1_33 | 104.4(15) | C1_37-C2_37-H2_37 | 120.9     |
| C1_35-O1_35-AI4   | 149(2)    | C3_37-C2_37-H2_37 | 120.9     |
| O1_35-C1_35-C2_35 | 110.1(15) | C4_37-C3_37-C2_37 | 125.7(17) |
| O1_35-C1_35-C3_35 | 108.2(16) | C4_37-C3_37-F2_37 | 118.9(17) |
| C2_35-C1_35-C3_35 | 112.2(12) | C2_37-C3_37-F2_37 | 115.4(17) |
| O1_35-C1_35-C4_35 | 108.9(16) | C3_37-C4_37-C5_37 | 116.8(17) |
| C2_35-C1_35-C4_35 | 109.7(12) | C3_37-C4_37-H4_37 | 121.6     |
| C3_35-C1_35-C4_35 | 107.6(12) | C5_37-C4_37-H4_37 | 121.6     |
| F3_35-C2_35-F1_35 | 106.7(18) | C4_37-C5_37-C6_37 | 116.8(17) |
| F3_35-C2_35-F2_35 | 107.5(18) | C4_37-C5_37-H5_37 | 121.6     |
| F1_35-C2_35-F2_35 | 108.3(18) | C6_37-C5_37-H5_37 | 121.6     |
| F3_35-C2_35-C1_35 | 113.9(16) | C1_37-C6_37-C5_37 | 117.8(17) |
| F1_35-C2_35-C1_35 | 110.7(15) | C1_37-C6_37-H6_37 | 121.1     |
| F2_35-C2_35-C1_35 | 109.5(15) | C5_37-C6_37-H6_37 | 121.1     |
| F5_35-C3_35-F6_35 | 108.5(19) | F1_41-C1_41-C2_41 | 116.6(15) |
| F5_35-C3_35-F4_35 | 107.3(18) | F1_41-C1_41-C6_41 | 125.0(16) |
| F6_35-C3_35-F4_35 | 108.4(18) | C2_41-C1_41-C6_41 | 118.3(14) |
| F5_35-C3_35-C1_35 | 109.5(16) | C3_41-C2_41-C1_41 | 111.0(17) |
| F6_35-C3_35-C1_35 | 112.1(16) | C3_41-C2_41-H2_41 | 124.5     |

|                   |           |
|-------------------|-----------|
| C1_41-C2_41-H2_41 | 124.5     |
| F2_41-C3_41-C4_41 | 107.8(17) |
| F2_41-C3_41-C2_41 | 111.7(17) |
| C4_41-C3_41-C2_41 | 140.2(19) |
| C3_41-C4_41-C5_41 | 111.1(15) |
| C3_41-C4_41-H4_41 | 124.5     |
| C5_41-C4_41-H4_41 | 124.5     |
| C4_41-C5_41-C6_41 | 108.6(15) |
| C4_41-C5_41-H5_41 | 125.7     |
| C6_41-C5_41-H5_41 | 125.7     |
| C1_41-C6_41-C5_41 | 128.4(15) |
| C1_41-C6_41-H6_41 | 115.8     |
| C5_41-C6_41-H6_41 | 115.8     |

Symmetry transformations used to generate equivalent atoms:

#1: 2-X, -Y, -Z;

S-Table 8: Bond lengths and angles for 2A

| Atom-Atom  | Length [Å] |            |            |
|------------|------------|------------|------------|
| Ga1-Al2    | 2.5306(8)  | Al11-C2_27 | 2.193(2)   |
| Ga1-Al3    | 2.5364(9)  | Al11-C1_27 | 2.206(2)   |
| Ga1-Al1    | 2.5392(7)  | Al11-C3_27 | 2.213(2)   |
| Ga2-Al4    | 2.5219(9)  | Al11-C4_27 | 2.230(2)   |
| Ga2-Al6    | 2.5266(7)  | Al11-C5_27 | 2.234(2)   |
| Ga2-Al5    | 2.5350(9)  | Al12-C4_40 | 2.19(3)    |
| Ga3-Al7    | 2.5299(8)  | Al12-C5_40 | 2.199(19)  |
| Ga3-Al9    | 2.5341(7)  | Al12-C5_26 | 2.207(11)  |
| Ga3-Al8    | 2.5341(7)  | Al12-C4_26 | 2.216(16)  |
| Ga4-Al11   | 2.5206(7)  | Al12-C1_26 | 2.220(9)   |
| Ga4-Al10   | 2.5263(9)  | Al12-C3_26 | 2.220(10)  |
| Ga4-Al12   | 2.5483(8)  | Al12-C2_26 | 2.223(9)   |
| Al1-C3_21  | 2.204(2)   | Al12-C1_40 | 2.228(13)  |
| Al1-C2_21  | 2.216(2)   | Al12-C3_40 | 2.258(15)  |
| Al1-C4_21  | 2.219(2)   | Al12-C2_40 | 2.267(13)  |
| Al1-C5_21  | 2.222(2)   | Al13-O1_31 | 1.653(11)  |
| Al1-C1_21  | 2.227(2)   | Al13-O1_28 | 1.675(17)  |
| Al6-C2_19  | 2.202(2)   | Al13-O1_30 | 1.691(15)  |
| Al6-C1_19  | 2.205(2)   | Al13-O1_10 | 1.693(5)   |
| Al6-C3_19  | 2.212(2)   | Al13-O1_36 | 1.693(16)  |
| Al6-C4_19  | 2.217(2)   | Al13-O1_9  | 1.7317(19) |
| Al6-C5_19  | 2.219(2)   | Al13-O1_12 | 1.733(4)   |
| Al7-C2_24  | 2.200(2)   | Al13-O1_11 | 1.747(3)   |
| Al7-C1_24  | 2.215(2)   | Al13-O1_29 | 1.833(13)  |
| Al7-C3_24  | 2.216(2)   | Al14-O1_35 | 1.670(11)  |
| Al7-C5_24  | 2.226(2)   | Al14-O1_34 | 1.693(12)  |
| Al7-C4_24  | 2.229(2)   | Al14-O1_15 | 1.7195(15) |
| Al8-C5_42  | 2.12(2)    | Al14-O1_14 | 1.7219(16) |
| Al8-C4_42  | 2.155(18)  | Al14-O1_16 | 1.726(2)   |
| Al8-C1_42  | 2.17(2)    | Al14-O1_13 | 1.7276(14) |
| Al8-C4_23  | 2.197(3)   | Al15-O1_39 | 1.65(2)    |
| Al8-C5_23  | 2.216(4)   | Al15-O1_8  | 1.7221(14) |
| Al8-C3_23  | 2.226(3)   | Al15-O1_7  | 1.7231(14) |
| Al8-C1_23  | 2.239(3)   | Al15-O1_5  | 1.7268(14) |
| Al8-C2_23  | 2.250(3)   | Al15-O1_6  | 1.735(3)   |
| Al8-C3_42  | 2.309(14)  | Al16-O1_4  | 1.683(13)  |
| Al8-C2_42  | 2.313(18)  | Al16-O1_33 | 1.696(19)  |
| Al9-C4_25  | 2.201(2)   | Al16-O1_2  | 1.7173(14) |
| Al9-C5_25  | 2.210(2)   | Al16-O1_3  | 1.7223(14) |
| Al9-C3_25  | 2.213(2)   | Al16-O1_1  | 1.745(13)  |
| Al9-C1_25  | 2.2145(19) | Al16-O1_32 | 1.775(14)  |
| Al9-C2_25  | 2.229(2)   | Al2-C4_20  | 2.209(2)   |
| Al10-C4_41 | 2.133(6)   | Al2-C5_20  | 2.211(2)   |
| Al10-C3_41 | 2.149(5)   | Al2-C3_20  | 2.219(2)   |
| Al10-C5_41 | 2.161(8)   | Al2-C1_20  | 2.225(2)   |
| Al10-C2_41 | 2.189(4)   | Al2-C2_20  | 2.237(2)   |
| Al10-C1_41 | 2.193(5)   | Al3-C2_22  | 2.202(2)   |
| Al10-C3_38 | 2.229(8)   | Al3-C1_22  | 2.212(2)   |
| Al10-C2_38 | 2.248(10)  | Al3-C3_22  | 2.216(2)   |
| Al10-C4_38 | 2.271(7)   | Al3-C4_22  | 2.231(2)   |
| Al10-C1_38 | 2.322(9)   | Al3-C5_22  | 2.232(2)   |
| Al10-C5_38 | 2.334(6)   | Al4-C4_18  | 2.162(4)   |
|            |            | Al4-C3_18  | 2.174(9)   |
|            |            | Al4-C3_37  | 2.196(9)   |
|            |            | Al4-C2_18  | 2.204(7)   |

|           |          |           |           |
|-----------|----------|-----------|-----------|
| AI4-C5_18 | 2.216(3) | C2_4-F1_4 | 1.329(8)  |
| AI4-C1_18 | 2.232(3) | C2_4-F2_4 | 1.341(6)  |
| AI4-C4_37 | 2.25(3)  | C3_4-F4_4 | 1.324(10) |
| AI4-C5_37 | 2.34(2)  | C3_4-F5_4 | 1.326(7)  |
| AI4-C2_37 | 2.344(9) | C3_4-F6_4 | 1.354(8)  |
| AI4-C1_37 | 2.447(9) | C4_4-F9_4 | 1.328(10) |
| AI5-C1_17 | 2.204(2) | C4_4-F7_4 | 1.338(5)  |
| AI5-C5_17 | 2.216(2) | C4_4-F8_4 | 1.339(7)  |
| AI5-C2_17 | 2.220(2) | O1_5-C1_5 | 1.351(2)  |
| AI5-C4_17 | 2.222(2) | C1_5-C2_5 | 1.550(3)  |
| AI5-C3_17 | 2.232(2) | C1_5-C4_5 | 1.553(3)  |
| O1_1-C1_1 | 1.353(8) | C1_5-C3_5 | 1.556(3)  |
| C1_1-C2_1 | 1.538(7) | C2_5-F1_5 | 1.329(3)  |
| C1_1-C3_1 | 1.543(7) | C2_5-F3_5 | 1.333(3)  |
| C1_1-C4_1 | 1.549(6) | C2_5-F2_5 | 1.336(2)  |
| C2_1-F2_1 | 1.324(8) | C3_5-F4_5 | 1.314(3)  |
| C2_1-F3_1 | 1.328(7) | C3_5-F5_5 | 1.334(3)  |
| C2_1-F1_1 | 1.338(6) | C3_5-F6_5 | 1.338(2)  |
| C3_1-F6_1 | 1.326(7) | C4_5-F7_5 | 1.326(3)  |
| C3_1-F4_1 | 1.329(8) | C4_5-F9_5 | 1.330(2)  |
| C3_1-F5_1 | 1.332(5) | C4_5-F8_5 | 1.339(2)  |
| C4_1-F9_1 | 1.258(7) | O1_6-C1_6 | 1.353(3)  |
| C4_1-F7_1 | 1.333(7) | C1_6-C4_6 | 1.551(4)  |
| C4_1-F8_1 | 1.338(7) | C1_6-C3_6 | 1.553(4)  |
| O1_2-C1_2 | 1.348(2) | C1_6-C2_6 | 1.557(4)  |
| C1_2-C3_2 | 1.548(3) | C2_6-F3_6 | 1.311(4)  |
| C1_2-C2_2 | 1.548(4) | C2_6-F2_6 | 1.328(3)  |
| C1_2-C4_2 | 1.556(3) | C2_6-F1_6 | 1.332(3)  |
| C2_2-F3_2 | 1.322(3) | C3_6-F4_6 | 1.315(4)  |
| C2_2-F1_2 | 1.340(3) | C3_6-F6_6 | 1.334(3)  |
| C2_2-F2_2 | 1.349(3) | C3_6-F5_6 | 1.343(5)  |
| C3_2-F4_2 | 1.323(3) | C4_6-F9_6 | 1.324(5)  |
| C3_2-F5_2 | 1.334(3) | C4_6-F8_6 | 1.330(4)  |
| C3_2-F6_2 | 1.345(2) | C4_6-F7_6 | 1.338(3)  |
| C4_2-F9_2 | 1.335(3) | O1_7-C1_7 | 1.347(2)  |
| C4_2-F8_2 | 1.342(3) | C1_7-C2_7 | 1.551(3)  |
| C4_2-F7_2 | 1.343(4) | C1_7-C3_7 | 1.552(3)  |
| O1_3-C1_3 | 1.349(2) | C1_7-C4_7 | 1.561(3)  |
| C1_3-C3_3 | 1.551(3) | C2_7-F3_7 | 1.320(2)  |
| C1_3-C2_3 | 1.552(3) | C2_7-F1_7 | 1.334(3)  |
| C1_3-C4_3 | 1.557(3) | C2_7-F2_7 | 1.349(2)  |
| C2_3-F3_3 | 1.313(3) | C3_7-F4_7 | 1.322(3)  |
| C2_3-F1_3 | 1.330(3) | C3_7-F5_7 | 1.338(3)  |
| C2_3-F2_3 | 1.340(2) | C3_7-F6_7 | 1.342(3)  |
| C3_3-F4_3 | 1.313(3) | C4_7-F9_7 | 1.323(3)  |
| C3_3-F6_3 | 1.332(3) | C4_7-F7_7 | 1.334(3)  |
| C3_3-F5_3 | 1.340(3) | C4_7-F8_7 | 1.336(2)  |
| C4_3-F9_3 | 1.327(3) | O1_8-C1_8 | 1.347(2)  |
| C4_3-F7_3 | 1.333(3) | C1_8-C4_8 | 1.549(3)  |
| C4_3-F8_3 | 1.335(3) | C1_8-C2_8 | 1.551(3)  |
| O1_4-C1_4 | 1.355(9) | C1_8-C3_8 | 1.561(3)  |
| C1_4-C4_4 | 1.549(8) | C2_8-F3_8 | 1.325(3)  |
| C1_4-C3_4 | 1.558(8) | C2_8-F1_8 | 1.334(3)  |
| C1_4-C2_4 | 1.560(8) | C2_8-F2_8 | 1.339(3)  |
| C2_4-F3_4 | 1.325(9) | C3_8-F4_8 | 1.328(3)  |



|             |          |             |          |
|-------------|----------|-------------|----------|
| C3_8-F6_8   | 1.330(3) | C4_12-F7_12 | 1.333(5) |
| C3_8-F5_8   | 1.339(3) | C4_12-F8_12 | 1.333(3) |
| C4_8-F7_8   | 1.330(3) | O1_13-C1_13 | 1.348(2) |
| C4_8-F9_8   | 1.333(2) | C1_13-C4_13 | 1.550(3) |
| C4_8-F8_8   | 1.338(3) | C1_13-C3_13 | 1.551(3) |
| O1_9-C1_9   | 1.344(3) | C1_13-C2_13 | 1.551(3) |
| C1_9-C2_9   | 1.547(3) | C2_13-F2_13 | 1.328(3) |
| C1_9-C3_9   | 1.553(3) | C2_13-F3_13 | 1.332(3) |
| C1_9-C4_9   | 1.553(3) | C2_13-F1_13 | 1.341(3) |
| C2_9-F1_9   | 1.330(3) | C3_13-F4_13 | 1.321(3) |
| C2_9-F3_9   | 1.336(3) | C3_13-F5_13 | 1.333(3) |
| C2_9-F2_9   | 1.336(3) | C3_13-F6_13 | 1.340(3) |
| C3_9-F5_9   | 1.324(3) | C4_13-F9_13 | 1.317(3) |
| C3_9-F4_9   | 1.330(3) | C4_13-F7_13 | 1.339(3) |
| C3_9-F6_9   | 1.349(3) | C4_13-F8_13 | 1.342(2) |
| C4_9-F9_9   | 1.315(3) | O1_14-C1_14 | 1.350(3) |
| C4_9-F7_9   | 1.326(3) | C1_14-C4_14 | 1.552(3) |
| C4_9-F8_9   | 1.348(3) | C1_14-C3_14 | 1.556(3) |
| O1_10-C1_10 | 1.356(5) | C1_14-C2_14 | 1.561(3) |
| C1_10-C2_10 | 1.536(5) | C2_14-F3_14 | 1.325(3) |
| C1_10-C3_10 | 1.550(5) | C2_14-F1_14 | 1.332(3) |
| C1_10-C4_10 | 1.554(4) | C2_14-F2_14 | 1.338(3) |
| C2_10-F1_10 | 1.311(5) | C3_14-F4_14 | 1.322(3) |
| C2_10-F3_10 | 1.336(4) | C3_14-F5_14 | 1.335(3) |
| C2_10-F2_10 | 1.345(5) | C3_14-F6_14 | 1.337(3) |
| C3_10-F4_10 | 1.305(6) | C4_14-F9_14 | 1.321(3) |
| C3_10-F5_10 | 1.316(5) | C4_14-F8_14 | 1.333(3) |
| C3_10-F6_10 | 1.348(4) | C4_14-F7_14 | 1.338(3) |
| C4_10-F9_10 | 1.315(4) | O1_15-C1_15 | 1.351(2) |
| C4_10-F7_10 | 1.326(4) | C1_15-C4_15 | 1.536(3) |
| C4_10-F8_10 | 1.344(3) | C1_15-C3_15 | 1.541(3) |
| O1_11-C1_11 | 1.349(4) | C1_15-C2_15 | 1.559(3) |
| C1_11-C3_11 | 1.548(4) | C2_15-F3_15 | 1.307(3) |
| C1_11-C4_11 | 1.552(4) | C2_15-F2_15 | 1.346(3) |
| C1_11-C2_11 | 1.563(4) | C2_15-F1_15 | 1.351(3) |
| C2_11-F2_11 | 1.318(3) | C3_15-F4_15 | 1.335(3) |
| C2_11-F3_11 | 1.325(3) | C3_15-F6_15 | 1.341(3) |
| C2_11-F1_11 | 1.342(3) | C3_15-F5_15 | 1.344(4) |
| C3_11-F5_11 | 1.321(3) | C4_15-F9_15 | 1.325(3) |
| C3_11-F4_11 | 1.335(3) | C4_15-F8_15 | 1.343(3) |
| C3_11-F6_11 | 1.341(3) | C4_15-F7_15 | 1.361(4) |
| C4_11-F9_11 | 1.310(4) | O1_16-C1_16 | 1.345(3) |
| C4_11-F8_11 | 1.342(3) | C1_16-C2_16 | 1.548(4) |
| C4_11-F7_11 | 1.347(3) | C1_16-C4_16 | 1.552(4) |
| O1_12-C1_12 | 1.354(5) | C1_16-C3_16 | 1.560(4) |
| C1_12-C2_12 | 1.549(5) | C2_16-F3_16 | 1.323(4) |
| C1_12-C3_12 | 1.552(4) | C2_16-F1_16 | 1.329(4) |
| C1_12-C4_12 | 1.560(4) | C2_16-F2_16 | 1.341(4) |
| C2_12-F3_12 | 1.317(5) | C3_16-F5_16 | 1.314(4) |
| C2_12-F2_12 | 1.333(4) | C3_16-F4_16 | 1.336(4) |
| C2_12-F1_12 | 1.339(5) | C3_16-F6_16 | 1.346(3) |
| C3_12-F4_12 | 1.330(4) | C4_16-F9_16 | 1.325(4) |
| C3_12-F6_12 | 1.334(5) | C4_16-F7_16 | 1.328(4) |
| C3_12-F5_12 | 1.335(4) | C4_16-F8_16 | 1.345(3) |
| C4_12-F9_12 | 1.321(3) | C1_17-C5_17 | 1.421(3) |

|                |          |                |          |
|----------------|----------|----------------|----------|
| C1_17-C2_17    | 1.428(3) | C3_19-C8_19    | 1.502(3) |
| C1_17-C10_17   | 1.503(3) | C4_19-C5_19    | 1.420(3) |
| C2_17-C3_17    | 1.422(3) | C4_19-C7_19    | 1.505(3) |
| C2_17-C9_17    | 1.501(3) | C5_19-C6_19    | 1.499(3) |
| C3_17-C4_17    | 1.411(3) | C6_19-H6A_19   | 0.9800   |
| C3_17-C8_17    | 1.510(3) | C6_19-H6B_19   | 0.9800   |
| C4_17-C5_17    | 1.428(3) | C6_19-H6C_19   | 0.9800   |
| C4_17-C7_17    | 1.507(3) | C7_19-H7A_19   | 0.9800   |
| C5_17-C6_17    | 1.501(3) | C7_19-H7B_19   | 0.9800   |
| C6_17-H6A_17   | 0.9800   | C7_19-H7C_19   | 0.9800   |
| C6_17-H6B_17   | 0.9800   | C8_19-H8A_19   | 0.9800   |
| C6_17-H6C_17   | 0.9800   | C8_19-H8B_19   | 0.9800   |
| C7_17-H7A_17   | 0.9800   | C8_19-H8C_19   | 0.9800   |
| C7_17-H7B_17   | 0.9800   | C9_19-H9A_19   | 0.9800   |
| C7_17-H7C_17   | 0.9800   | C9_19-H9B_19   | 0.9800   |
| C8_17-H8A_17   | 0.9800   | C9_19-H9C_19   | 0.9800   |
| C8_17-H8B_17   | 0.9800   | C10_19-H10A_19 | 0.9800   |
| C8_17-H8C_17   | 0.9800   | C10_19-H10B_19 | 0.9800   |
| C9_17-H9A_17   | 0.9800   | C10_19-H10C_19 | 0.9800   |
| C9_17-H9B_17   | 0.9800   | C1_20-C5_20    | 1.415(4) |
| C9_17-H9C_17   | 0.9800   | C1_20-C2_20    | 1.418(3) |
| C10_17-H10A_17 | 0.9800   | C1_20-C10_20   | 1.505(4) |
| C10_17-H10B_17 | 0.9800   | C2_20-C3_20    | 1.424(3) |
| C10_17-H10C_17 | 0.9800   | C2_20-C9_20    | 1.501(4) |
| C1_18-C2_18    | 1.420(5) | C3_20-C4_20    | 1.420(3) |
| C1_18-C5_18    | 1.428(5) | C3_20-C8_20    | 1.501(3) |
| C1_18-C10_18   | 1.512(5) | C4_20-C5_20    | 1.427(4) |
| C2_18-C3_18    | 1.426(5) | C4_20-C7_20    | 1.501(4) |
| C2_18-C9_18    | 1.504(6) | C5_20-C6_20    | 1.508(4) |
| C3_18-C4_18    | 1.413(6) | C6_20-H6A_20   | 0.9800   |
| C3_18-C8_18    | 1.511(5) | C6_20-H6B_20   | 0.9800   |
| C4_18-C5_18    | 1.418(6) | C6_20-H6C_20   | 0.9800   |
| C4_18-C7_18    | 1.508(5) | C7_20-H7A_20   | 0.9800   |
| C5_18-C6_18    | 1.504(5) | C7_20-H7B_20   | 0.9800   |
| C6_18-H6A_18   | 0.9800   | C7_20-H7C_20   | 0.9800   |
| C6_18-H6B_18   | 0.9800   | C8_20-H8A_20   | 0.9800   |
| C6_18-H6C_18   | 0.9800   | C8_20-H8B_20   | 0.9800   |
| C7_18-H7A_18   | 0.9800   | C8_20-H8C_20   | 0.9800   |
| C7_18-H7B_18   | 0.9800   | C9_20-H9A_20   | 0.9800   |
| C7_18-H7C_18   | 0.9800   | C9_20-H9B_20   | 0.9800   |
| C8_18-H8A_18   | 0.9800   | C9_20-H9C_20   | 0.9800   |
| C8_18-H8B_18   | 0.9800   | C10_20-H10A_20 | 0.9800   |
| C8_18-H8C_18   | 0.9800   | C10_20-H10B_20 | 0.9800   |
| C9_18-H9A_18   | 0.9800   | C10_20-H10C_20 | 0.9800   |
| C9_18-H9B_18   | 0.9800   | C1_21-C5_21    | 1.416(3) |
| C9_18-H9C_18   | 0.9800   | C1_21-C2_21    | 1.418(3) |
| C10_18-H10A_18 | 0.9800   | C1_21-C10_21   | 1.506(3) |
| C10_18-H10B_18 | 0.9800   | C2_21-C3_21    | 1.420(3) |
| C10_18-H10C_18 | 0.9800   | C2_21-C9_21    | 1.503(3) |
| C1_19-C5_19    | 1.425(3) | C3_21-C4_21    | 1.411(3) |
| C1_19-C2_19    | 1.431(3) | C3_21-C8_21    | 1.503(3) |
| C1_19-C10_19   | 1.501(3) | C4_21-C5_21    | 1.416(3) |
| C2_19-C3_19    | 1.425(3) | C4_21-C7_21    | 1.504(3) |
| C2_19-C9_19    | 1.499(3) | C5_21-C6_21    | 1.504(3) |
| C3_19-C4_19    | 1.417(3) | C6_21-H6A_21   | 0.9800   |

|                |          |                |          |
|----------------|----------|----------------|----------|
| C6_21-H6B_21   | 0.9800   | C8_23-H8A_23   | 0.9800   |
| C6_21-H6C_21   | 0.9800   | C8_23-H8B_23   | 0.9800   |
| C7_21-H7A_21   | 0.9800   | C8_23-H8C_23   | 0.9800   |
| C7_21-H7B_21   | 0.9800   | C9_23-H9A_23   | 0.9800   |
| C7_21-H7C_21   | 0.9800   | C9_23-H9B_23   | 0.9800   |
| C8_21-H8A_21   | 0.9800   | C9_23-H9C_23   | 0.9800   |
| C8_21-H8B_21   | 0.9800   | C10_23-H10A_23 | 0.9800   |
| C8_21-H8C_21   | 0.9800   | C10_23-H10B_23 | 0.9800   |
| C9_21-H9A_21   | 0.9800   | C10_23-H10C_23 | 0.9800   |
| C9_21-H9B_21   | 0.9800   | C1_24-C5_24    | 1.420(3) |
| C9_21-H9C_21   | 0.9800   | C1_24-C2_24    | 1.423(3) |
| C10_21-H10A_21 | 0.9800   | C1_24-C10_24   | 1.503(3) |
| C10_21-H10B_21 | 0.9800   | C2_24-C3_24    | 1.419(3) |
| C10_21-H10C_21 | 0.9800   | C2_24-C9_24    | 1.511(3) |
| C1_22-C2_22    | 1.420(3) | C3_24-C4_24    | 1.426(3) |
| C1_22-C5_22    | 1.432(3) | C3_24-C8_24    | 1.503(3) |
| C1_22-C10_22   | 1.500(3) | C4_24-C5_24    | 1.412(3) |
| C2_22-C3_22    | 1.425(3) | C4_24-C7_24    | 1.509(3) |
| C2_22-C9_22    | 1.502(3) | C5_24-C6_24    | 1.504(3) |
| C3_22-C4_22    | 1.414(3) | C6_24-H6A_24   | 0.9800   |
| C3_22-C8_22    | 1.504(3) | C6_24-H6B_24   | 0.9800   |
| C4_22-C5_22    | 1.413(3) | C6_24-H6C_24   | 0.9800   |
| C4_22-C7_22    | 1.510(3) | C7_24-H7A_24   | 0.9800   |
| C5_22-C6_22    | 1.503(3) | C7_24-H7B_24   | 0.9800   |
| C6_22-H6A_22   | 0.9800   | C7_24-H7C_24   | 0.9800   |
| C6_22-H6B_22   | 0.9800   | C8_24-H8A_24   | 0.9800   |
| C6_22-H6C_22   | 0.9800   | C8_24-H8B_24   | 0.9800   |
| C7_22-H7A_22   | 0.9800   | C8_24-H8C_24   | 0.9800   |
| C7_22-H7B_22   | 0.9800   | C9_24-H9A_24   | 0.9800   |
| C7_22-H7C_22   | 0.9800   | C9_24-H9B_24   | 0.9800   |
| C8_22-H8A_22   | 0.9800   | C9_24-H9C_24   | 0.9800   |
| C8_22-H8B_22   | 0.9800   | C10_24-H10A_24 | 0.9800   |
| C8_22-H8C_22   | 0.9800   | C10_24-H10B_24 | 0.9800   |
| C9_22-H9A_22   | 0.9800   | C10_24-H10C_24 | 0.9800   |
| C9_22-H9B_22   | 0.9800   | C1_25-C2_25    | 1.424(3) |
| C9_22-H9C_22   | 0.9800   | C1_25-C5_25    | 1.425(3) |
| C10_22-H10A_22 | 0.9800   | C1_25-C10_25   | 1.498(3) |
| C10_22-H10B_22 | 0.9800   | C2_25-C3_25    | 1.427(3) |
| C10_22-H10C_22 | 0.9800   | C2_25-C9_25    | 1.501(3) |
| C1_23-C2_23    | 1.417(3) | C3_25-C4_25    | 1.426(3) |
| C1_23-C5_23    | 1.425(4) | C3_25-C8_25    | 1.503(3) |
| C1_23-C10_23   | 1.504(4) | C4_25-C5_25    | 1.426(3) |
| C2_23-C3_23    | 1.421(4) | C4_25-C7_25    | 1.500(3) |
| C2_23-C9_23    | 1.512(4) | C5_25-C6_25    | 1.500(3) |
| C3_23-C4_23    | 1.443(4) | C6_25-H6A_25   | 0.9800   |
| C3_23-C8_23    | 1.497(4) | C6_25-H6B_25   | 0.9800   |
| C4_23-C5_23    | 1.421(4) | C6_25-H6C_25   | 0.9800   |
| C4_23-C7_23    | 1.504(4) | C7_25-H7A_25   | 0.9800   |
| C5_23-C6_23    | 1.504(4) | C7_25-H7B_25   | 0.9800   |
| C6_23-H6A_23   | 0.9800   | C7_25-H7C_25   | 0.9800   |
| C6_23-H6B_23   | 0.9800   | C8_25-H8A_25   | 0.9800   |
| C6_23-H6C_23   | 0.9800   | C8_25-H8B_25   | 0.9800   |
| C7_23-H7A_23   | 0.9800   | C8_25-H8C_25   | 0.9800   |
| C7_23-H7B_23   | 0.9800   | C9_25-H9A_25   | 0.9800   |
| C7_23-H7C_23   | 0.9800   | C9_25-H9B_25   | 0.9800   |

|                |           |             |           |
|----------------|-----------|-------------|-----------|
| C9_25-H9C_25   | 0.9800    | C1_29-C2_29 | 1.545(10) |
| C10_25-H10A_25 | 0.9800    | C1_29-C4_29 | 1.547(9)  |
| C10_25-H10B_25 | 0.9800    | C1_29-C3_29 | 1.566(9)  |
| C10_25-H10C_25 | 0.9800    | C2_29-F2_29 | 1.332(10) |
| C1_26-C2_26    | 1.409(6)  | C2_29-F3_29 | 1.350(10) |
| C1_26-C5_26    | 1.426(6)  | C2_29-F1_29 | 1.357(9)  |
| C1_26-C10_26   | 1.513(7)  | C3_29-F5_29 | 1.321(8)  |
| C2_26-C3_26    | 1.425(7)  | C3_29-F6_29 | 1.332(8)  |
| C2_26-C9_26    | 1.508(7)  | C3_29-F4_29 | 1.339(8)  |
| C3_26-C4_26    | 1.423(7)  | C4_29-F7_29 | 1.314(10) |
| C3_26-C8_26    | 1.503(7)  | C4_29-F9_29 | 1.324(9)  |
| C4_26-C5_26    | 1.413(7)  | C4_29-F8_29 | 1.343(10) |
| C4_26-C7_26    | 1.503(7)  | O1_30-C1_30 | 1.358(12) |
| C5_26-C6_26    | 1.493(6)  | C1_30-C4_30 | 1.548(11) |
| C6_26-H6A_26   | 0.9800    | C1_30-C2_30 | 1.548(11) |
| C6_26-H6B_26   | 0.9800    | C1_30-C3_30 | 1.560(11) |
| C6_26-H6C_26   | 0.9800    | C2_30-F2_30 | 1.340(12) |
| C7_26-H7A_26   | 0.9800    | C2_30-F1_30 | 1.348(12) |
| C7_26-H7B_26   | 0.9800    | C2_30-F3_30 | 1.351(12) |
| C7_26-H7C_26   | 0.9800    | C3_30-F4_30 | 1.321(11) |
| C8_26-H8A_26   | 0.9800    | C3_30-F6_30 | 1.335(11) |
| C8_26-H8B_26   | 0.9800    | C3_30-F5_30 | 1.341(11) |
| C8_26-H8C_26   | 0.9800    | C4_30-F7_30 | 1.312(11) |
| C9_26-H9A_26   | 0.9800    | C4_30-F9_30 | 1.319(11) |
| C9_26-H9B_26   | 0.9800    | C4_30-F8_30 | 1.344(12) |
| C9_26-H9C_26   | 0.9800    | O1_31-C1_31 | 1.345(11) |
| C10_26-H10A_26 | 0.9800    | C1_31-C3_31 | 1.556(10) |
| C10_26-H10B_26 | 0.9800    | C1_31-C2_31 | 1.560(10) |
| C10_26-H10C_26 | 0.9800    | C1_31-C4_31 | 1.575(10) |
| C1_27-C2_27    | 1.423(3)  | C2_31-F2_31 | 1.326(9)  |
| C1_27-C5_27    | 1.430(3)  | C2_31-F3_31 | 1.347(10) |
| C1_27-C10_27   | 1.502(3)  | C2_31-F1_31 | 1.353(9)  |
| C2_27-C3_27    | 1.421(3)  | C3_31-F5_31 | 1.292(10) |
| C2_27-C9_27    | 1.501(3)  | C3_31-F4_31 | 1.313(9)  |
| C3_27-C4_27    | 1.426(3)  | C3_31-F6_31 | 1.350(8)  |
| C3_27-C8_27    | 1.501(3)  | C4_31-F9_31 | 1.306(10) |
| C4_27-C5_27    | 1.416(3)  | C4_31-F7_31 | 1.315(11) |
| C4_27-C7_27    | 1.504(3)  | C4_31-F8_31 | 1.340(10) |
| C5_27-C6_27    | 1.500(3)  | O1_32-C1_32 | 1.352(10) |
| C6_27-H6A_27   | 0.9800    | C1_32-C3_32 | 1.544(9)  |
| C6_27-H6B_27   | 0.9800    | C1_32-C4_32 | 1.549(9)  |
| C6_27-H6C_27   | 0.9800    | C1_32-C2_32 | 1.553(9)  |
| C7_27-H7A_27   | 0.9800    | C2_32-F3_32 | 1.317(10) |
| C7_27-H7B_27   | 0.9800    | C2_32-F1_32 | 1.321(8)  |
| C7_27-H7C_27   | 0.9800    | C2_32-F2_32 | 1.337(7)  |
| C8_27-H8A_27   | 0.9800    | C3_32-F4_32 | 1.327(11) |
| C8_27-H8B_27   | 0.9800    | C3_32-F5_32 | 1.332(7)  |
| C8_27-H8C_27   | 0.9800    | C3_32-F6_32 | 1.343(8)  |
| C9_27-H9A_27   | 0.9800    | C4_32-F9_32 | 1.332(11) |
| C9_27-H9B_27   | 0.9800    | C4_32-F7_32 | 1.336(7)  |
| C9_27-H9C_27   | 0.9800    | C4_32-F8_32 | 1.338(9)  |
| C10_27-H10A_27 | 0.9800    | O1_33-C1_33 | 1.355(11) |
| C10_27-H10B_27 | 0.9800    | C1_33-C2_33 | 1.535(10) |
| C10_27-H10C_27 | 0.9800    | C1_33-C3_33 | 1.545(10) |
| O1_29-C1_29    | 1.349(11) | C1_33-C4_33 | 1.555(10) |

|              |           |                |           |
|--------------|-----------|----------------|-----------|
| C2_33-F1_33  | 1.327(9)  | C4_37-C5_37    | 1.418(12) |
| C2_33-F3_33  | 1.331(11) | C4_37-C7_37    | 1.510(12) |
| C2_33-F2_33  | 1.357(9)  | C5_37-C6_37    | 1.522(11) |
| C3_33-F6_33  | 1.325(11) | C6_37-H6A_37   | 0.9800    |
| C3_33-F4_33  | 1.328(10) | C6_37-H6B_37   | 0.9800    |
| C3_33-F5_33  | 1.334(9)  | C6_37-H6C_37   | 0.9800    |
| C4_33-F9_33  | 1.274(10) | C7_37-H7A_37   | 0.9800    |
| C4_33-F7_33  | 1.306(8)  | C7_37-H7B_37   | 0.9800    |
| C4_33-F8_33  | 1.342(10) | C7_37-H7C_37   | 0.9800    |
| O1_34-C1_34  | 1.363(13) | C8_37-H8A_37   | 0.9800    |
| C1_34-C4_34  | 1.536(12) | C8_37-H8B_37   | 0.9800    |
| C1_34-C2_34  | 1.551(12) | C8_37-H8C_37   | 0.9800    |
| C1_34-C3_34  | 1.553(12) | C9_37-H9A_37   | 0.9800    |
| C2_34-F2_34  | 1.321(13) | C9_37-H9B_37   | 0.9800    |
| C2_34-F1_34  | 1.323(13) | C9_37-H9C_37   | 0.9800    |
| C2_34-F3_34  | 1.326(13) | C10_37-H10A_37 | 0.9800    |
| C3_34-F6_34  | 1.326(13) | C10_37-H10B_37 | 0.9800    |
| C3_34-F5_34  | 1.327(13) | C10_37-H10C_37 | 0.9800    |
| C3_34-F4_34  | 1.328(13) | O1_39-C1_39    | 1.359(13) |
| C4_34-F9_34  | 1.333(12) | C1_39-C4_39    | 1.544(12) |
| C4_34-F8_34  | 1.334(12) | C1_39-C2_39    | 1.547(12) |
| C4_34-F7_34  | 1.341(12) | C1_39-C3_39    | 1.551(12) |
| O1_35-C1_35  | 1.365(12) | C2_39-F1_39    | 1.325(12) |
| C1_35-C4_35  | 1.538(12) | C2_39-F3_39    | 1.328(13) |
| C1_35-C3_35  | 1.548(12) | C2_39-F2_39    | 1.342(13) |
| C1_35-C2_35  | 1.552(12) | C3_39-F4_39    | 1.311(13) |
| C2_35-F1_35  | 1.333(12) | C3_39-F6_39    | 1.328(12) |
| C2_35-F2_35  | 1.333(12) | C3_39-F5_39    | 1.339(12) |
| C2_35-F3_35  | 1.337(12) | C4_39-F9_39    | 1.290(12) |
| C3_35-F6_35  | 1.325(12) | C4_39-F8_39    | 1.335(12) |
| C3_35-F4_35  | 1.334(13) | C4_39-F7_39    | 1.344(13) |
| C3_35-F5_35  | 1.336(13) | C1_41-C5_41    | 1.419(6)  |
| C4_35-F9_35  | 1.329(13) | C1_41-C2_41    | 1.425(6)  |
| C4_35-F7_35  | 1.333(13) | C1_41-C10_41   | 1.500(6)  |
| C4_35-F8_35  | 1.337(13) | C2_41-C3_41    | 1.414(7)  |
| O1_36-C1_36  | 1.353(13) | C2_41-C9_41    | 1.516(7)  |
| C1_36-C4_36  | 1.547(12) | C3_41-C4_41    | 1.432(8)  |
| C1_36-C2_36  | 1.557(12) | C3_41-C8_41    | 1.505(6)  |
| C1_36-C3_36  | 1.561(12) | C4_41-C5_41    | 1.413(8)  |
| C2_36-F2_36  | 1.340(12) | C4_41-C7_41    | 1.495(7)  |
| C2_36-F1_36  | 1.341(12) | C5_41-C6_41    | 1.510(7)  |
| C2_36-F3_36  | 1.342(12) | C6_41-H6A_41   | 0.9800    |
| C3_36-F5_36  | 1.331(13) | C6_41-H6B_41   | 0.9800    |
| C3_36-F6_36  | 1.335(12) | C6_41-H6C_41   | 0.9800    |
| C3_36-F4_36  | 1.337(13) | C7_41-H7A_41   | 0.9800    |
| C4_36-F9_36  | 1.329(13) | C7_41-H7B_41   | 0.9800    |
| C4_36-F8_36  | 1.336(13) | C7_41-H7C_41   | 0.9800    |
| C4_36-F7_36  | 1.337(13) | C8_41-H8A_41   | 0.9800    |
| C1_37-C5_37  | 1.417(11) | C8_41-H8B_41   | 0.9800    |
| C1_37-C2_37  | 1.419(10) | C8_41-H8C_41   | 0.9800    |
| C1_37-C10_37 | 1.521(10) | C9_41-H9A_41   | 0.9800    |
| C2_37-C3_37  | 1.411(10) | C9_41-H9B_41   | 0.9800    |
| C2_37-C9_37  | 1.506(10) | C9_41-H9C_41   | 0.9800    |
| C3_37-C4_37  | 1.431(12) | C10_41-H10A_41 | 0.9800    |
| C3_37-C8_37  | 1.503(10) | C10_41-H10B_41 | 0.9800    |

|                |           |                       |                  |
|----------------|-----------|-----------------------|------------------|
| C10_41-H10C_41 | 0.9800    | C8_40-H8A_40          | 0.9800           |
| C1_38-C5_38    | 1.412(8)  | C8_40-H8B_40          | 0.9800           |
| C1_38-C2_38    | 1.425(9)  | C8_40-H8C_40          | 0.9800           |
| C1_38-C10_38   | 1.504(9)  | C9_40-H9A_40          | 0.9800           |
| C2_38-C3_38    | 1.403(10) | C9_40-H9B_40          | 0.9800           |
| C2_38-C9_38    | 1.493(9)  | C9_40-H9C_40          | 0.9800           |
| C3_38-C4_38    | 1.420(9)  | C10_40-H10A_40        | 0.9800           |
| C3_38-C8_38    | 1.495(9)  | C10_40-H10B_40        | 0.9800           |
| C4_38-C5_38    | 1.413(7)  | C10_40-H10C_40        | 0.9800           |
| C4_38-C7_38    | 1.520(9)  | C1_42-C2_42           | 1.419(12)        |
| C5_38-C6_38    | 1.489(7)  | C1_42-C5_42           | 1.423(12)        |
| C6_38-H6A_38   | 0.9800    | C1_42-C10_42          | 1.504(13)        |
| C6_38-H6B_38   | 0.9800    | C2_42-C3_42           | 1.414(12)        |
| C6_38-H6C_38   | 0.9800    | C2_42-C9_42           | 1.509(12)        |
| C7_38-H7A_38   | 0.9800    | C3_42-C4_42           | 1.417(12)        |
| C7_38-H7B_38   | 0.9800    | C3_42-C8_42           | 1.513(12)        |
| C7_38-H7C_38   | 0.9800    | C4_42-C5_42           | 1.416(12)        |
| C8_38-H8A_38   | 0.9800    | C4_42-C7_42           | 1.507(12)        |
| C8_38-H8B_38   | 0.9800    | C5_42-C6_42           | 1.494(12)        |
| C8_38-H8C_38   | 0.9800    | C6_42-H6A_42          | 0.9800           |
| C9_38-H9A_38   | 0.9800    | C6_42-H6B_42          | 0.9800           |
| C9_38-H9B_38   | 0.9800    | C6_42-H6C_42          | 0.9800           |
| C9_38-H9C_38   | 0.9800    | C7_42-H7A_42          | 0.9800           |
| C10_38-H10A_38 | 0.9800    | C7_42-H7B_42          | 0.9800           |
| C10_38-H10B_38 | 0.9800    | C7_42-H7C_42          | 0.9800           |
| C10_38-H10C_38 | 0.9800    | C8_42-H8A_42          | 0.9800           |
| O1_28-C1_28    | 1.356(13) | C8_42-H8B_42          | 0.9800           |
| C1_28-C3_28    | 1.551(12) | C8_42-H8C_42          | 0.9800           |
| C1_28-C4_28    | 1.552(12) | C9_42-H9A_42          | 0.9800           |
| C1_28-C2_28    | 1.555(12) | C9_42-H9B_42          | 0.9800           |
| C2_28-F2_28    | 1.326(12) | C9_42-H9C_42          | 0.9800           |
| C2_28-F1_28    | 1.327(12) | C10_42-H10A_42        | 0.9800           |
| C2_28-F3_28    | 1.343(12) | C10_42-H10B_42        | 0.9800           |
| C3_28-F4_28    | 1.334(12) | C10_42-H10C_42        | 0.9800           |
| C3_28-F6_28    | 1.341(12) |                       |                  |
| C3_28-F5_28    | 1.342(12) | <b>Atom-Atom-Atom</b> | <b>Angle [°]</b> |
| C4_28-F8_28    | 1.324(13) | Al2-Ga1-Al3           | 75.22(3)         |
| C4_28-F9_28    | 1.327(13) | Al2-Ga1-Al1           | 74.86(3)         |
| C4_28-F7_28    | 1.342(13) | Al3-Ga1-Al1           | 76.25(2)         |
| C1_40-C2_40    | 1.416(9)  | Al4-Ga2-Al6           | 73.77(3)         |
| C1_40-C5_40    | 1.420(9)  | Al4-Ga2-Al5           | 73.51(2)         |
| C1_40-C10_40   | 1.518(9)  | Al6-Ga2-Al5           | 75.91(2)         |
| C2_40-C3_40    | 1.424(9)  | Al7-Ga3-Al9           | 76.31(2)         |
| C2_40-C9_40    | 1.511(10) | Al7-Ga3-Al8           | 75.44(2)         |
| C3_40-C4_40    | 1.420(10) | Al9-Ga3-Al8           | 76.07(3)         |
| C3_40-C8_40    | 1.512(10) | Al11-Ga4-Al10         | 75.66(2)         |
| C4_40-C5_40    | 1.423(10) | Al11-Ga4-Al12         | 76.96(3)         |
| C4_40-C7_40    | 1.514(10) | Al10-Ga4-Al12         | 73.62(2)         |
| C5_40-C6_40    | 1.495(10) | C3_21-Al1-C2_21       | 37.47(8)         |
| C6_40-H6A_40   | 0.9800    | C3_21-Al1-C4_21       | 37.22(8)         |
| C6_40-H6B_40   | 0.9800    | C2_21-Al1-C4_21       | 62.30(8)         |
| C6_40-H6C_40   | 0.9800    | C3_21-Al1-C5_21       | 62.19(8)         |
| C7_40-H7A_40   | 0.9800    | C2_21-Al1-C5_21       | 62.15(8)         |
| C7_40-H7B_40   | 0.9800    | C4_21-Al1-C5_21       | 37.20(9)         |
| C7_40-H7C_40   | 0.9800    | C3_21-Al1-C1_21       | 62.30(8)         |

|                 |           |                  |            |
|-----------------|-----------|------------------|------------|
| C2_21-A11-C1_21 | 37.21(8)  | C4_42-A18-C2_42  | 61.5(5)    |
| C4_21-A11-C1_21 | 62.16(9)  | C1_42-A18-C2_42  | 36.7(4)    |
| C5_21-A11-C1_21 | 37.13(9)  | C3_42-A18-C2_42  | 35.6(4)    |
| C3_21-A11-Ga1   | 173.64(6) | C5_42-A18-Ga3    | 127.5(5)   |
| C2_21-A11-Ga1   | 148.27(7) | C4_42-A18-Ga3    | 140.2(5)   |
| C4_21-A11-Ga1   | 141.94(7) | C1_42-A18-Ga3    | 136.0(5)   |
| C5_21-A11-Ga1   | 121.22(6) | C4_23-A18-Ga3    | 166.62(10) |
| C1_21-A11-Ga1   | 123.86(6) | C5_23-A18-Ga3    | 133.67(10) |
| C2_19-A16-C1_19 | 37.91(8)  | C3_23-A18-Ga3    | 155.07(9)  |
| C2_19-A16-C3_19 | 37.66(8)  | C1_23-A18-Ga3    | 117.04(8)  |
| C1_19-A16-C3_19 | 63.04(8)  | C2_23-A18-Ga3    | 126.25(8)  |
| C2_19-A16-C4_19 | 62.66(8)  | C3_42-A18-Ga3    | 162.6(3)   |
| C1_19-A16-C4_19 | 62.69(8)  | C2_42-A18-Ga3    | 157.6(4)   |
| C3_19-A16-C4_19 | 37.33(8)  | C4_25-A19-C5_25  | 37.72(7)   |
| C2_19-A16-C5_19 | 62.92(8)  | C4_25-A19-C3_25  | 37.70(8)   |
| C1_19-A16-C5_19 | 37.58(7)  | C5_25-A19-C3_25  | 62.92(8)   |
| C3_19-A16-C5_19 | 62.66(8)  | C4_25-A19-C1_25  | 62.84(7)   |
| C4_19-A16-C5_19 | 37.35(8)  | C5_25-A19-C1_25  | 37.58(7)   |
| C2_19-A16-Ga2   | 160.03(6) | C3_25-A19-C1_25  | 62.63(7)   |
| C1_19-A16-Ga2   | 160.01(6) | C4_25-A19-C2_25  | 62.85(7)   |
| C3_19-A16-Ga2   | 126.39(6) | C5_25-A19-C2_25  | 62.78(8)   |
| C4_19-A16-Ga2   | 112.61(6) | C3_25-A19-C2_25  | 37.47(7)   |
| C5_19-A16-Ga2   | 126.48(6) | C1_25-A19-C2_25  | 37.38(8)   |
| C2_24-A17-C1_24 | 37.60(8)  | C4_25-A19-Ga3    | 159.08(6)  |
| C2_24-A17-C3_24 | 37.50(9)  | C5_25-A19-Ga3    | 127.75(6)  |
| C1_24-A17-C3_24 | 62.46(8)  | C3_25-A19-Ga3    | 162.78(6)  |
| C2_24-A17-C5_24 | 62.61(8)  | C1_25-A19-Ga3    | 116.01(6)  |
| C1_24-A17-C5_24 | 37.29(8)  | C2_25-A19-Ga3    | 130.43(6)  |
| C3_24-A17-C5_24 | 62.29(8)  | C4_41-A110-C3_41 | 39.1(2)    |
| C2_24-A17-C4_24 | 62.56(9)  | C4_41-A110-C5_41 | 38.4(2)    |
| C1_24-A17-C4_24 | 62.13(8)  | C3_41-A110-C5_41 | 65.1(2)    |
| C3_24-A17-C4_24 | 37.42(9)  | C4_41-A110-C2_41 | 63.8(2)    |
| C5_24-A17-C4_24 | 36.95(8)  | C3_41-A110-C2_41 | 38.04(18)  |
| C2_24-A17-Ga3   | 166.56(7) | C5_41-A110-C2_41 | 64.0(2)    |
| C1_24-A17-Ga3   | 139.11(6) | C4_41-A110-C1_41 | 63.5(2)    |
| C3_24-A17-Ga3   | 154.69(7) | C3_41-A110-C1_41 | 64.08(16)  |
| C5_24-A17-Ga3   | 123.70(6) | C5_41-A110-C1_41 | 38.02(18)  |
| C4_24-A17-Ga3   | 130.22(7) | C2_41-A110-C1_41 | 37.95(15)  |
| C5_42-A18-C4_42 | 38.7(4)   | C3_38-A110-C2_38 | 36.5(3)    |
| C5_42-A18-C1_42 | 38.8(4)   | C3_38-A110-C4_38 | 36.8(2)    |
| C4_42-A18-C1_42 | 63.5(6)   | C2_38-A110-C4_38 | 60.3(3)    |
| C4_23-A18-C5_23 | 37.56(11) | C3_38-A110-C1_38 | 61.1(3)    |
| C4_23-A18-C3_23 | 38.07(11) | C2_38-A110-C1_38 | 36.3(3)    |
| C5_23-A18-C3_23 | 62.69(12) | C4_38-A110-C1_38 | 60.2(3)    |
| C4_23-A18-C1_23 | 62.67(11) | C3_38-A110-C5_38 | 60.2(2)    |
| C5_23-A18-C1_23 | 37.29(10) | C2_38-A110-C5_38 | 59.2(3)    |
| C3_23-A18-C1_23 | 62.18(10) | C4_38-A110-C5_38 | 35.71(19)  |
| C4_23-A18-C2_23 | 62.51(10) | C1_38-A110-C5_38 | 35.3(2)    |
| C5_23-A18-C2_23 | 61.90(11) | C4_41-A110-Ga4   | 129.00(15) |
| C3_23-A18-C2_23 | 37.00(10) | C3_41-A110-Ga4   | 119.85(13) |
| C1_23-A18-C2_23 | 36.79(9)  | C5_41-A110-Ga4   | 155.85(15) |
| C5_42-A18-C3_42 | 62.7(5)   | C2_41-A110-Ga4   | 135.96(14) |
| C4_42-A18-C3_42 | 36.8(3)   | C1_41-A110-Ga4   | 165.69(14) |
| C1_42-A18-C3_42 | 61.3(5)   | C3_38-A110-Ga4   | 157.9(3)   |
| C5_42-A18-C2_42 | 62.8(5)   | C2_38-A110-Ga4   | 165.3(3)   |

|                  |            |                  |            |
|------------------|------------|------------------|------------|
| C4_38-Al10-Ga4   | 128.8(2)   | O1_9-Al13-O1_11  | 107.63(15) |
| C1_38-Al10-Ga4   | 133.6(2)   | O1_12-Al13-O1_11 | 108.2(2)   |
| C5_38-Al10-Ga4   | 119.81(16) | O1_31-Al13-O1_29 | 105.2(7)   |
| C2_27-Al11-C1_27 | 37.74(9)   | O1_30-Al13-O1_29 | 107.2(8)   |
| C2_27-Al11-C3_27 | 37.62(8)   | O1_36-Al13-O1_29 | 110.0(9)   |
| C1_27-Al11-C3_27 | 62.83(9)   | O1_35-Al14-O1_34 | 105.7(9)   |
| C2_27-Al11-C4_27 | 62.64(8)   | O1_15-Al14-O1_14 | 107.50(8)  |
| C1_27-Al11-C4_27 | 62.43(8)   | O1_15-Al14-O1_16 | 113.38(11) |
| C3_27-Al11-C4_27 | 37.45(7)   | O1_14-Al14-O1_16 | 107.24(11) |
| C2_27-Al11-C5_27 | 62.81(9)   | O1_15-Al14-O1_13 | 108.12(7)  |
| C1_27-Al11-C5_27 | 37.57(8)   | O1_14-Al14-O1_13 | 112.06(8)  |
| C3_27-Al11-C5_27 | 62.49(8)   | O1_16-Al14-O1_13 | 108.62(8)  |
| C4_27-Al11-C5_27 | 37.00(8)   | O1_8-Al15-O1_7   | 111.57(7)  |
| C2_27-Al11-Ga4   | 172.94(7)  | O1_8-Al15-O1_5   | 108.51(7)  |
| C1_27-Al11-Ga4   | 148.85(7)  | O1_7-Al15-O1_5   | 107.41(7)  |
| C3_27-Al11-Ga4   | 137.05(7)  | O1_8-Al15-O1_6   | 107.79(13) |
| C4_27-Al11-Ga4   | 116.10(6)  | O1_7-Al15-O1_6   | 107.54(11) |
| C5_27-Al11-Ga4   | 120.89(7)  | O1_5-Al15-O1_6   | 114.07(14) |
| C4_40-Al12-C5_40 | 37.8(4)    | O1_4-Al16-O1_2   | 114.6(7)   |
| C5_26-Al12-C4_26 | 37.3(3)    | O1_4-Al16-O1_3   | 107.4(7)   |
| C5_26-Al12-C1_26 | 37.6(2)    | O1_2-Al16-O1_3   | 107.46(7)  |
| C4_26-Al12-C1_26 | 62.5(3)    | O1_4-Al16-O1_1   | 110.1(8)   |
| C5_26-Al12-C3_26 | 62.4(3)    | O1_2-Al16-O1_1   | 105.6(6)   |
| C4_26-Al12-C3_26 | 37.4(2)    | O1_3-Al16-O1_1   | 111.7(6)   |
| C1_26-Al12-C3_26 | 62.4(3)    | O1_33-Al16-O1_32 | 102.7(11)  |
| C5_26-Al12-C2_26 | 62.2(3)    | C4_20-Al2-C5_20  | 37.67(10)  |
| C4_26-Al12-C2_26 | 62.4(3)    | C4_20-Al2-C3_20  | 37.41(8)   |
| C1_26-Al12-C2_26 | 37.0(2)    | C5_20-Al2-C3_20  | 62.26(8)   |
| C3_26-Al12-C2_26 | 37.4(2)    | C4_20-Al2-C1_20  | 62.60(11)  |
| C4_40-Al12-C1_40 | 62.1(6)    | C5_20-Al2-C1_20  | 37.20(12)  |
| C5_40-Al12-C1_40 | 37.4(3)    | C3_20-Al2-C1_20  | 62.00(8)   |
| C4_40-Al12-C3_40 | 37.2(4)    | C4_20-Al2-C2_20  | 62.68(9)   |
| C5_40-Al12-C3_40 | 62.4(5)    | C5_20-Al2-C2_20  | 62.24(10)  |
| C1_40-Al12-C3_40 | 61.2(4)    | C3_20-Al2-C2_20  | 37.27(8)   |
| C4_40-Al12-C2_40 | 62.1(6)    | C1_20-Al2-C2_20  | 37.05(9)   |
| C5_40-Al12-C2_40 | 62.5(4)    | C4_20-Al2-Ga1    | 158.16(7)  |
| C1_40-Al12-C2_40 | 36.7(3)    | C5_20-Al2-Ga1    | 128.58(7)  |
| C3_40-Al12-C2_40 | 36.7(3)    | C3_20-Al2-Ga1    | 164.36(6)  |
| C4_40-Al12-Ga4   | 160.6(3)   | C1_20-Al2-Ga1    | 118.23(8)  |
| C5_40-Al12-Ga4   | 126.3(4)   | C2_20-Al2-Ga1    | 132.75(7)  |
| C5_26-Al12-Ga4   | 123.6(2)   | C2_22-Al3-C1_22  | 37.54(8)   |
| C4_26-Al12-Ga4   | 154.4(2)   | C2_22-Al3-C3_22  | 37.62(8)   |
| C1_26-Al12-Ga4   | 114.00(19) | C1_22-Al3-C3_22  | 62.40(8)   |
| C3_26-Al12-Ga4   | 166.7(2)   | C2_22-Al3-C4_22  | 62.68(8)   |
| C2_26-Al12-Ga4   | 131.8(2)   | C1_22-Al3-C4_22  | 62.45(9)   |
| C1_40-Al12-Ga4   | 112.9(3)   | C3_22-Al3-C4_22  | 37.08(8)   |
| C3_40-Al12-Ga4   | 159.7(3)   | C2_22-Al3-C5_22  | 62.63(8)   |
| C2_40-Al12-Ga4   | 126.5(3)   | C1_22-Al3-C5_22  | 37.58(9)   |
| O1_31-Al13-O1_30 | 123.5(9)   | C3_22-Al3-C5_22  | 61.84(9)   |
| O1_31-Al13-O1_36 | 122.0(8)   | C4_22-Al3-C5_22  | 36.91(9)   |
| O1_30-Al13-O1_36 | 87.6(9)    | C2_22-Al3-Ga1    | 163.78(7)  |
| O1_10-Al13-O1_9  | 107.4(2)   | C1_22-Al3-Ga1    | 158.60(7)  |
| O1_10-Al13-O1_12 | 110.8(2)   | C3_22-Al3-Ga1    | 134.17(6)  |
| O1_9-Al13-O1_12  | 111.66(15) | C4_22-Al3-Ga1    | 120.28(6)  |
| O1_10-Al13-O1_11 | 111.1(3)   | C5_22-Al3-Ga1    | 130.43(7)  |



|                 |            |                |            |
|-----------------|------------|----------------|------------|
| C4_18-AI4-C3_18 | 38.02(17)  | F2_1-C2_1-C1_1 | 114.8(8)   |
| C4_18-AI4-C2_18 | 63.38(18)  | F3_1-C2_1-C1_1 | 110.0(5)   |
| C3_18-AI4-C2_18 | 38.01(18)  | F1_1-C2_1-C1_1 | 110.8(5)   |
| C4_18-AI4-C5_18 | 37.78(15)  | F6_1-C3_1-F4_1 | 108.0(7)   |
| C3_18-AI4-C5_18 | 63.13(18)  | F6_1-C3_1-F5_1 | 106.3(5)   |
| C2_18-AI4-C5_18 | 62.73(17)  | F4_1-C3_1-F5_1 | 107.0(5)   |
| C4_18-AI4-C1_18 | 63.08(14)  | F6_1-C3_1-C1_1 | 113.4(6)   |
| C3_18-AI4-C1_18 | 63.03(18)  | F4_1-C3_1-C1_1 | 111.0(6)   |
| C2_18-AI4-C1_18 | 37.32(14)  | F5_1-C3_1-C1_1 | 110.8(4)   |
| C5_18-AI4-C1_18 | 37.46(13)  | F9_1-C4_1-F7_1 | 100.9(5)   |
| C3_37-AI4-C4_37 | 37.5(4)    | F9_1-C4_1-F8_1 | 110.0(6)   |
| C3_37-AI4-C5_37 | 61.2(5)    | F7_1-C4_1-F8_1 | 106.9(5)   |
| C4_37-AI4-C5_37 | 35.9(4)    | F9_1-C4_1-C1_1 | 114.2(6)   |
| C3_37-AI4-C2_37 | 36.0(3)    | F7_1-C4_1-C1_1 | 111.1(4)   |
| C4_37-AI4-C2_37 | 59.7(5)    | F8_1-C4_1-C1_1 | 112.9(5)   |
| C5_37-AI4-C2_37 | 58.8(4)    | C1_2-O1_2-AI16 | 146.01(13) |
| C3_37-AI4-C1_37 | 59.0(3)    | O1_2-C1_2-C3_2 | 106.90(16) |
| C4_37-AI4-C1_37 | 58.0(5)    | O1_2-C1_2-C2_2 | 110.92(19) |
| C5_37-AI4-C1_37 | 34.3(3)    | C3_2-C1_2-C2_2 | 109.65(18) |
| C2_37-AI4-C1_37 | 34.4(2)    | O1_2-C1_2-C4_2 | 110.99(18) |
| C4_18-AI4-Ga2   | 157.63(14) | C3_2-C1_2-C4_2 | 109.9(2)   |
| C3_18-AI4-Ga2   | 163.40(14) | C2_2-C1_2-C4_2 | 108.5(2)   |
| C3_37-AI4-Ga2   | 128.5(3)   | F3_2-C2_2-F1_2 | 108.2(2)   |
| C2_18-AI4-Ga2   | 129.54(15) | F3_2-C2_2-F2_2 | 106.8(2)   |
| C5_18-AI4-Ga2   | 125.90(12) | F1_2-C2_2-F2_2 | 108.0(2)   |
| C1_18-AI4-Ga2   | 114.29(10) | F3_2-C2_2-C1_2 | 110.7(2)   |
| C4_37-AI4-Ga2   | 135.8(4)   | F1_2-C2_2-C1_2 | 110.9(2)   |
| C5_37-AI4-Ga2   | 157.0(3)   | F2_2-C2_2-C1_2 | 111.9(2)   |
| C2_37-AI4-Ga2   | 142.9(3)   | F4_2-C3_2-F5_2 | 108.84(18) |
| C1_37-AI4-Ga2   | 166.0(2)   | F4_2-C3_2-F6_2 | 106.9(2)   |
| C1_17-AI5-C5_17 | 37.50(8)   | F5_2-C3_2-F6_2 | 107.85(18) |
| C1_17-AI5-C2_17 | 37.65(8)   | F4_2-C3_2-C1_2 | 110.33(17) |
| C5_17-AI5-C2_17 | 62.59(8)   | F5_2-C3_2-C1_2 | 110.57(19) |
| C1_17-AI5-C4_17 | 62.60(8)   | F6_2-C3_2-C1_2 | 112.25(18) |
| C5_17-AI5-C4_17 | 37.54(9)   | F9_2-C4_2-F8_2 | 106.8(2)   |
| C2_17-AI5-C4_17 | 62.20(8)   | F9_2-C4_2-F7_2 | 108.2(2)   |
| C1_17-AI5-C3_17 | 62.55(8)   | F8_2-C4_2-F7_2 | 107.9(2)   |
| C5_17-AI5-C3_17 | 62.34(9)   | F9_2-C4_2-C1_2 | 110.4(2)   |
| C2_17-AI5-C3_17 | 37.25(8)   | F8_2-C4_2-C1_2 | 112.4(2)   |
| C4_17-AI5-C3_17 | 36.95(8)   | F7_2-C4_2-C1_2 | 111.0(2)   |
| C1_17-AI5-Ga2   | 152.43(6)  | C1_3-O1_3-AI16 | 148.67(13) |
| C5_17-AI5-Ga2   | 125.03(6)  | O1_3-C1_3-C3_3 | 109.12(16) |
| C2_17-AI5-Ga2   | 169.92(6)  | O1_3-C1_3-C2_3 | 107.98(16) |
| C4_17-AI5-Ga2   | 118.81(7)  | C3_3-C1_3-C2_3 | 109.52(17) |
| C3_17-AI5-Ga2   | 137.15(6)  | O1_3-C1_3-C4_3 | 112.13(16) |
| C1_1-O1_1-AI16  | 145.0(13)  | C3_3-C1_3-C4_3 | 108.90(17) |
| O1_1-C1_1-C2_1  | 112.2(9)   | C2_3-C1_3-C4_3 | 109.15(17) |
| O1_1-C1_1-C3_1  | 107.4(9)   | F3_3-C2_3-F1_3 | 107.97(18) |
| C2_1-C1_1-C3_1  | 109.0(5)   | F3_3-C2_3-F2_3 | 107.89(19) |
| O1_1-C1_1-C4_1  | 110.2(9)   | F1_3-C2_3-F2_3 | 107.07(18) |
| C2_1-C1_1-C4_1  | 109.3(5)   | F3_3-C2_3-C1_3 | 111.14(18) |
| C3_1-C1_1-C4_1  | 108.6(5)   | F1_3-C2_3-C1_3 | 110.02(18) |
| F2_1-C2_1-F3_1  | 109.5(9)   | F2_3-C2_3-C1_3 | 112.56(17) |
| F2_1-C2_1-F1_1  | 104.4(7)   | F4_3-C3_3-F6_3 | 108.85(18) |
| F3_1-C2_1-F1_1  | 107.0(5)   | F4_3-C3_3-F5_3 | 107.6(2)   |

|                |            |                |            |
|----------------|------------|----------------|------------|
| F6_3-C3_3-F5_3 | 107.21(18) | F7_5-C4_5-F8_5 | 107.74(17) |
| F4_3-C3_3-C1_3 | 110.43(18) | F9_5-C4_5-F8_5 | 107.12(17) |
| F6_3-C3_3-C1_3 | 112.47(18) | F7_5-C4_5-C1_5 | 111.29(17) |
| F5_3-C3_3-C1_3 | 110.12(17) | F9_5-C4_5-C1_5 | 110.74(16) |
| F9_3-C4_3-F7_3 | 107.2(2)   | F8_5-C4_5-C1_5 | 112.49(17) |
| F9_3-C4_3-F8_3 | 108.0(2)   | C1_6-O1_6-AI15 | 146.3(2)   |
| F7_3-C4_3-F8_3 | 107.21(19) | O1_6-C1_6-C4_6 | 111.9(3)   |
| F9_3-C4_3-C1_3 | 110.49(18) | O1_6-C1_6-C3_6 | 110.7(2)   |
| F7_3-C4_3-C1_3 | 111.27(19) | C4_6-C1_6-C3_6 | 109.5(2)   |
| F8_3-C4_3-C1_3 | 112.47(19) | O1_6-C1_6-C2_6 | 106.6(2)   |
| C1_4-O1_4-AI16 | 150.6(14)  | C4_6-C1_6-C2_6 | 109.1(2)   |
| O1_4-C1_4-C4_4 | 109.9(10)  | C3_6-C1_6-C2_6 | 108.9(2)   |
| O1_4-C1_4-C3_4 | 110.2(10)  | F3_6-C2_6-F2_6 | 108.4(3)   |
| C4_4-C1_4-C3_4 | 108.9(5)   | F3_6-C2_6-F1_6 | 105.4(3)   |
| O1_4-C1_4-C2_4 | 110.2(9)   | F2_6-C2_6-F1_6 | 107.3(2)   |
| C4_4-C1_4-C2_4 | 108.6(5)   | F3_6-C2_6-C1_6 | 111.7(2)   |
| C3_4-C1_4-C2_4 | 108.9(5)   | F2_6-C2_6-C1_6 | 113.2(2)   |
| F3_4-C2_4-F1_4 | 107.6(7)   | F1_6-C2_6-C1_6 | 110.4(2)   |
| F3_4-C2_4-F2_4 | 107.2(7)   | F4_6-C3_6-F6_6 | 108.8(3)   |
| F1_4-C2_4-F2_4 | 107.7(5)   | F4_6-C3_6-F5_6 | 106.7(3)   |
| F3_4-C2_4-C1_4 | 110.5(6)   | F6_6-C3_6-F5_6 | 108.5(3)   |
| F1_4-C2_4-C1_4 | 111.1(5)   | F4_6-C3_6-C1_6 | 110.3(3)   |
| F2_4-C2_4-C1_4 | 112.6(5)   | F6_6-C3_6-C1_6 | 112.3(2)   |
| F4_4-C3_4-F5_4 | 107.1(7)   | F5_6-C3_6-C1_6 | 110.1(3)   |
| F4_4-C3_4-F6_4 | 106.2(9)   | F9_6-C4_6-F8_6 | 108.3(3)   |
| F5_4-C3_4-F6_4 | 108.3(6)   | F9_6-C4_6-F7_6 | 107.4(3)   |
| F4_4-C3_4-C1_4 | 112.5(9)   | F8_6-C4_6-F7_6 | 106.8(2)   |
| F5_4-C3_4-C1_4 | 111.2(5)   | F9_6-C4_6-C1_6 | 110.6(3)   |
| F6_4-C3_4-C1_4 | 111.3(7)   | F8_6-C4_6-C1_6 | 112.8(3)   |
| F9_4-C4_4-F7_4 | 106.8(7)   | F7_6-C4_6-C1_6 | 110.7(2)   |
| F9_4-C4_4-F8_4 | 107.6(10)  | C1_7-O1_7-AI15 | 150.49(13) |
| F7_4-C4_4-F8_4 | 107.4(4)   | O1_7-C1_7-C2_7 | 111.81(16) |
| F9_4-C4_4-C1_4 | 110.7(9)   | O1_7-C1_7-C3_7 | 110.06(17) |
| F7_4-C4_4-C1_4 | 111.2(4)   | C2_7-C1_7-C3_7 | 109.30(16) |
| F8_4-C4_4-C1_4 | 112.8(5)   | O1_7-C1_7-C4_7 | 107.14(16) |
| C1_5-O1_5-AI15 | 146.99(13) | C2_7-C1_7-C4_7 | 109.29(17) |
| O1_5-C1_5-C2_5 | 110.99(16) | C3_7-C1_7-C4_7 | 109.18(17) |
| O1_5-C1_5-C4_5 | 111.23(16) | F3_7-C2_7-F1_7 | 107.39(18) |
| C2_5-C1_5-C4_5 | 108.43(17) | F3_7-C2_7-F2_7 | 107.53(17) |
| O1_5-C1_5-C3_5 | 107.71(16) | F1_7-C2_7-F2_7 | 106.80(17) |
| C2_5-C1_5-C3_5 | 109.44(17) | F3_7-C2_7-C1_7 | 111.05(16) |
| C4_5-C1_5-C3_5 | 109.01(16) | F1_7-C2_7-C1_7 | 111.04(17) |
| F1_5-C2_5-F3_5 | 107.51(19) | F2_7-C2_7-C1_7 | 112.76(17) |
| F1_5-C2_5-F2_5 | 107.56(19) | F4_7-C3_7-F5_7 | 107.56(19) |
| F3_5-C2_5-F2_5 | 107.41(18) | F4_7-C3_7-F6_7 | 107.14(19) |
| F1_5-C2_5-C1_5 | 110.81(18) | F5_7-C3_7-F6_7 | 106.89(17) |
| F3_5-C2_5-C1_5 | 110.91(18) | F4_7-C3_7-C1_7 | 111.70(17) |
| F2_5-C2_5-C1_5 | 112.44(18) | F5_7-C3_7-C1_7 | 110.83(18) |
| F4_5-C3_5-F5_5 | 107.33(18) | F6_7-C3_7-C1_7 | 112.45(19) |
| F4_5-C3_5-F6_5 | 108.03(18) | F9_7-C4_7-F7_7 | 107.45(18) |
| F5_5-C3_5-F6_5 | 107.05(17) | F9_7-C4_7-F8_7 | 107.91(19) |
| F4_5-C3_5-C1_5 | 111.24(17) | F7_7-C4_7-F8_7 | 107.77(18) |
| F5_5-C3_5-C1_5 | 110.71(18) | F9_7-C4_7-C1_7 | 110.32(17) |
| F6_5-C3_5-C1_5 | 112.25(18) | F7_7-C4_7-C1_7 | 110.67(18) |
| F7_5-C4_5-F9_5 | 107.23(17) | F8_7-C4_7-C1_7 | 112.53(17) |

|                   |            |                   |          |
|-------------------|------------|-------------------|----------|
| C1_8-O1_8-AI15    | 148.13(13) | C2_10-C1_10-C4_10 | 109.0(3) |
| O1_8-C1_8-C4_8    | 111.27(16) | C3_10-C1_10-C4_10 | 109.0(3) |
| O1_8-C1_8-C2_8    | 110.25(16) | F1_10-C2_10-F3_10 | 107.0(4) |
| C4_8-C1_8-C2_8    | 109.72(18) | F1_10-C2_10-F2_10 | 107.1(4) |
| O1_8-C1_8-C3_8    | 107.01(17) | F3_10-C2_10-F2_10 | 107.7(4) |
| C4_8-C1_8-C3_8    | 109.16(16) | F1_10-C2_10-C1_10 | 111.8(3) |
| C2_8-C1_8-C3_8    | 109.38(17) | F3_10-C2_10-C1_10 | 110.1(3) |
| F3_8-C2_8-F1_8    | 107.91(19) | F2_10-C2_10-C1_10 | 112.8(4) |
| F3_8-C2_8-F2_8    | 107.69(19) | F4_10-C3_10-F5_10 | 106.1(4) |
| F1_8-C2_8-F2_8    | 107.42(18) | F4_10-C3_10-F6_10 | 107.4(5) |
| F3_8-C2_8-C1_8    | 110.53(18) | F5_10-C3_10-F6_10 | 107.3(4) |
| F1_8-C2_8-C1_8    | 110.73(18) | F4_10-C3_10-C1_10 | 111.7(4) |
| F2_8-C2_8-C1_8    | 112.38(19) | F5_10-C3_10-C1_10 | 111.7(4) |
| F4_8-C3_8-F6_8    | 107.76(18) | F6_10-C3_10-C1_10 | 112.3(3) |
| F4_8-C3_8-F5_8    | 107.08(19) | F9_10-C4_10-F7_10 | 107.5(3) |
| F6_8-C3_8-F5_8    | 107.51(18) | F9_10-C4_10-F8_10 | 108.3(3) |
| F4_8-C3_8-C1_8    | 111.02(18) | F7_10-C4_10-F8_10 | 107.3(2) |
| F6_8-C3_8-C1_8    | 112.75(19) | F9_10-C4_10-C1_10 | 110.7(2) |
| F5_8-C3_8-C1_8    | 110.48(17) | F7_10-C4_10-C1_10 | 111.1(3) |
| F7_8-C4_8-F9_8    | 107.11(18) | F8_10-C4_10-C1_10 | 111.9(2) |
| F7_8-C4_8-F8_8    | 108.06(18) | C1_11-O1_11-AI13  | 147.1(3) |
| F9_8-C4_8-F8_8    | 107.11(18) | O1_11-C1_11-C3_11 | 110.3(3) |
| F7_8-C4_8-C1_8    | 111.27(18) | O1_11-C1_11-C4_11 | 107.4(3) |
| F9_8-C4_8-C1_8    | 110.46(16) | C3_11-C1_11-C4_11 | 110.0(2) |
| F8_8-C4_8-C1_8    | 112.57(18) | O1_11-C1_11-C2_11 | 111.9(3) |
| C1_9-O1_9-AI13    | 148.53(18) | C3_11-C1_11-C2_11 | 108.4(2) |
| O1_9-C1_9-C2_9    | 111.2(2)   | C4_11-C1_11-C2_11 | 108.8(2) |
| O1_9-C1_9-C3_9    | 107.0(2)   | F2_11-C2_11-F3_11 | 108.3(2) |
| C2_9-C1_9-C3_9    | 109.2(2)   | F2_11-C2_11-F1_11 | 107.1(2) |
| O1_9-C1_9-C4_9    | 111.3(2)   | F3_11-C2_11-F1_11 | 106.8(2) |
| C2_9-C1_9-C4_9    | 108.7(2)   | F2_11-C2_11-C1_11 | 113.3(2) |
| C3_9-C1_9-C4_9    | 109.3(2)   | F3_11-C2_11-C1_11 | 110.4(2) |
| F1_9-C2_9-F3_9    | 107.8(2)   | F1_11-C2_11-C1_11 | 110.7(2) |
| F1_9-C2_9-F2_9    | 107.7(2)   | F5_11-C3_11-F4_11 | 107.5(2) |
| F3_9-C2_9-F2_9    | 107.4(2)   | F5_11-C3_11-F6_11 | 107.1(2) |
| F1_9-C2_9-C1_9    | 111.5(2)   | F4_11-C3_11-F6_11 | 106.5(2) |
| F3_9-C2_9-C1_9    | 110.1(2)   | F5_11-C3_11-C1_11 | 111.0(2) |
| F2_9-C2_9-C1_9    | 112.2(2)   | F4_11-C3_11-C1_11 | 111.2(2) |
| F5_9-C3_9-F4_9    | 107.7(3)   | F6_11-C3_11-C1_11 | 113.3(2) |
| F5_9-C3_9-F6_9    | 108.0(2)   | F9_11-C4_11-F8_11 | 107.9(2) |
| F4_9-C3_9-F6_9    | 106.6(2)   | F9_11-C4_11-F7_11 | 107.9(3) |
| F5_9-C3_9-C1_9    | 111.0(2)   | F8_11-C4_11-F7_11 | 105.9(2) |
| F4_9-C3_9-C1_9    | 111.0(2)   | F9_11-C4_11-C1_11 | 111.3(3) |
| F6_9-C3_9-C1_9    | 112.3(2)   | F8_11-C4_11-C1_11 | 112.3(2) |
| F9_9-C4_9-F7_9    | 107.6(2)   | F7_11-C4_11-C1_11 | 111.3(2) |
| F9_9-C4_9-F8_9    | 107.3(2)   | C1_12-O1_12-AI13  | 147.0(4) |
| F7_9-C4_9-F8_9    | 107.0(2)   | O1_12-C1_12-C2_12 | 110.4(3) |
| F9_9-C4_9-C1_9    | 110.9(2)   | O1_12-C1_12-C3_12 | 107.5(3) |
| F7_9-C4_9-C1_9    | 111.4(2)   | C2_12-C1_12-C3_12 | 109.9(3) |
| F8_9-C4_9-C1_9    | 112.4(2)   | O1_12-C1_12-C4_12 | 111.4(3) |
| C1_10-O1_10-AI13  | 144.9(4)   | C2_12-C1_12-C4_12 | 109.2(3) |
| O1_10-C1_10-C2_10 | 107.0(4)   | C3_12-C1_12-C4_12 | 108.4(2) |
| O1_10-C1_10-C3_10 | 111.3(4)   | F3_12-C2_12-F2_12 | 107.6(4) |
| C2_10-C1_10-C3_10 | 109.2(3)   | F3_12-C2_12-F1_12 | 108.4(3) |
| O1_10-C1_10-C4_10 | 111.3(3)   | F2_12-C2_12-F1_12 | 107.1(3) |

|                   |            |                   |            |
|-------------------|------------|-------------------|------------|
| F3_12-C2_12-C1_12 | 110.4(3)   | F5_14-C3_14-F6_14 | 106.3(2)   |
| F2_12-C2_12-C1_12 | 113.0(3)   | F4_14-C3_14-C1_14 | 110.5(2)   |
| F1_12-C2_12-C1_12 | 110.2(3)   | F5_14-C3_14-C1_14 | 110.6(2)   |
| F4_12-C3_12-F6_12 | 108.4(4)   | F6_14-C3_14-C1_14 | 112.8(2)   |
| F4_12-C3_12-F5_12 | 106.8(3)   | F9_14-C4_14-F8_14 | 108.3(2)   |
| F6_12-C3_12-F5_12 | 106.3(3)   | F9_14-C4_14-F7_14 | 107.1(2)   |
| F4_12-C3_12-C1_12 | 111.5(3)   | F8_14-C4_14-F7_14 | 107.1(2)   |
| F6_12-C3_12-C1_12 | 113.0(4)   | F9_14-C4_14-C1_14 | 110.9(2)   |
| F5_12-C3_12-C1_12 | 110.5(3)   | F8_14-C4_14-C1_14 | 113.0(2)   |
| F9_12-C4_12-F7_12 | 107.0(3)   | F7_14-C4_14-C1_14 | 110.1(2)   |
| F9_12-C4_12-F8_12 | 107.8(2)   | C1_15-O1_15-AI14  | 149.24(14) |
| F7_12-C4_12-F8_12 | 107.5(3)   | O1_15-C1_15-C4_15 | 109.33(18) |
| F9_12-C4_12-C1_12 | 110.2(2)   | O1_15-C1_15-C3_15 | 112.36(17) |
| F7_12-C4_12-C1_12 | 111.5(3)   | C4_15-C1_15-C3_15 | 109.4(2)   |
| F8_12-C4_12-C1_12 | 112.6(3)   | O1_15-C1_15-C2_15 | 108.46(18) |
| C1_13-O1_13-AI14  | 146.80(13) | C4_15-C1_15-C2_15 | 108.5(2)   |
| O1_13-C1_13-C4_13 | 107.63(16) | C3_15-C1_15-C2_15 | 108.6(2)   |
| O1_13-C1_13-C3_13 | 110.26(17) | F3_15-C2_15-F2_15 | 108.3(2)   |
| C4_13-C1_13-C3_13 | 109.43(17) | F3_15-C2_15-F1_15 | 108.3(2)   |
| O1_13-C1_13-C2_13 | 111.12(16) | F2_15-C2_15-F1_15 | 107.6(2)   |
| C4_13-C1_13-C2_13 | 109.49(17) | F3_15-C2_15-C1_15 | 111.3(2)   |
| C3_13-C1_13-C2_13 | 108.88(17) | F2_15-C2_15-C1_15 | 111.8(2)   |
| F2_13-C2_13-F3_13 | 108.07(19) | F1_15-C2_15-C1_15 | 109.4(2)   |
| F2_13-C2_13-F1_13 | 107.79(19) | F4_15-C3_15-F6_15 | 106.9(2)   |
| F3_13-C2_13-F1_13 | 106.76(19) | F4_15-C3_15-F5_15 | 108.3(2)   |
| F2_13-C2_13-C1_13 | 113.00(19) | F6_15-C3_15-F5_15 | 109.5(2)   |
| F3_13-C2_13-C1_13 | 110.43(17) | F4_15-C3_15-C1_15 | 109.9(2)   |
| F1_13-C2_13-C1_13 | 110.55(18) | F6_15-C3_15-C1_15 | 112.4(2)   |
| F4_13-C3_13-F5_13 | 107.08(19) | F5_15-C3_15-C1_15 | 109.8(2)   |
| F4_13-C3_13-F6_13 | 107.48(19) | F9_15-C4_15-F8_15 | 107.0(2)   |
| F5_13-C3_13-F6_13 | 107.12(19) | F9_15-C4_15-F7_15 | 107.6(2)   |
| F4_13-C3_13-C1_13 | 111.22(18) | F8_15-C4_15-F7_15 | 108.7(2)   |
| F5_13-C3_13-C1_13 | 111.23(18) | F9_15-C4_15-C1_15 | 111.5(2)   |
| F6_13-C3_13-C1_13 | 112.44(19) | F8_15-C4_15-C1_15 | 112.5(2)   |
| F9_13-C4_13-F7_13 | 107.81(19) | F7_15-C4_15-C1_15 | 109.3(2)   |
| F9_13-C4_13-F8_13 | 107.35(18) | C1_16-O1_16-AI14  | 150.0(2)   |
| F7_13-C4_13-F8_13 | 106.95(18) | O1_16-C1_16-C2_16 | 111.4(2)   |
| F9_13-C4_13-C1_13 | 111.48(17) | O1_16-C1_16-C4_16 | 110.3(2)   |
| F7_13-C4_13-C1_13 | 110.63(18) | C2_16-C1_16-C4_16 | 109.0(2)   |
| F8_13-C4_13-C1_13 | 112.38(18) | O1_16-C1_16-C3_16 | 107.1(2)   |
| C1_14-O1_14-AI14  | 150.31(16) | C2_16-C1_16-C3_16 | 109.0(3)   |
| O1_14-C1_14-C4_14 | 107.20(19) | C4_16-C1_16-C3_16 | 110.0(3)   |
| O1_14-C1_14-C3_14 | 111.9(2)   | F3_16-C2_16-F1_16 | 107.7(3)   |
| C4_14-C1_14-C3_14 | 109.6(2)   | F3_16-C2_16-F2_16 | 108.3(4)   |
| O1_14-C1_14-C2_14 | 110.0(2)   | F1_16-C2_16-F2_16 | 107.0(3)   |
| C4_14-C1_14-C2_14 | 109.2(2)   | F3_16-C2_16-C1_16 | 110.3(3)   |
| C3_14-C1_14-C2_14 | 108.8(2)   | F1_16-C2_16-C1_16 | 111.1(3)   |
| F3_14-C2_14-F1_14 | 108.6(2)   | F2_16-C2_16-C1_16 | 112.3(3)   |
| F3_14-C2_14-F2_14 | 107.9(2)   | F5_16-C3_16-F4_16 | 108.1(3)   |
| F1_14-C2_14-F2_14 | 106.8(3)   | F5_16-C3_16-F6_16 | 108.7(3)   |
| F3_14-C2_14-C1_14 | 110.6(2)   | F4_16-C3_16-F6_16 | 107.2(3)   |
| F1_14-C2_14-C1_14 | 110.3(3)   | F5_16-C3_16-C1_16 | 111.3(3)   |
| F2_14-C2_14-C1_14 | 112.6(2)   | F4_16-C3_16-C1_16 | 110.0(3)   |
| F4_14-C3_14-F5_14 | 108.1(2)   | F6_16-C3_16-C1_16 | 111.4(3)   |
| F4_14-C3_14-F6_14 | 108.3(3)   | F9_16-C4_16-F7_16 | 106.9(3)   |

|                    |            |                    |           |
|--------------------|------------|--------------------|-----------|
| F9_16-C4_16-F8_16  | 107.3(3)   | H8A_17-C8_17-      | 109.5     |
| F7_16-C4_16-F8_16  | 107.3(3)   | H8B_17             |           |
| F9_16-C4_16-C1_16  | 110.7(2)   | C3_17-C8_17-H8C_17 | 109.5     |
| F7_16-C4_16-C1_16  | 111.8(3)   | H8A_17-C8_17-      | 109.5     |
| F8_16-C4_16-C1_16  | 112.6(3)   | H8C_17             |           |
| C5_17-C1_17-C2_17  | 107.98(18) | H8B_17-C8_17-      | 109.5     |
| C5_17-C1_17-C10_17 | 127.8(2)   | H8C_17             |           |
| C2_17-C1_17-C10_17 | 124.1(2)   | C2_17-C9_17-H9A_17 | 109.5     |
| C5_17-C1_17-AI5    | 71.70(12)  | C2_17-C9_17-H9B_17 | 109.5     |
| C2_17-C1_17-AI5    | 71.78(12)  | H9A_17-C9_17-      | 109.5     |
| C10_17-C1_17-AI5   | 125.26(15) | H9B_17             |           |
| C3_17-C2_17-C1_17  | 107.86(19) | C2_17-C9_17-H9C_17 | 109.5     |
| C3_17-C2_17-C9_17  | 127.2(2)   | H9A_17-C9_17-      | 109.5     |
| C1_17-C2_17-C9_17  | 124.75(19) | H9C_17             |           |
| C3_17-C2_17-AI5    | 71.83(12)  | H9B_17-C9_17-      | 109.5     |
| C1_17-C2_17-AI5    | 70.57(12)  | H9C_17             |           |
| C9_17-C2_17-AI5    | 127.20(15) | C1_17-C10_17-      | 109.5     |
| C4_17-C3_17-C2_17  | 108.16(19) | H10A_17            |           |
| C4_17-C3_17-C8_17  | 126.0(2)   | C1_17-C10_17-      | 109.5     |
| C2_17-C3_17-C8_17  | 125.8(2)   | H10B_17            |           |
| C4_17-C3_17-AI5    | 71.14(13)  | H10A_17-C10_17-    | 109.5     |
| C2_17-C3_17-AI5    | 70.93(12)  | H10B_17            |           |
| C8_17-C3_17-AI5    | 126.41(17) | C1_17-C10_17-      | 109.5     |
| C3_17-C4_17-C5_17  | 108.35(19) | H10C_17            |           |
| C3_17-C4_17-C7_17  | 125.4(2)   | H10A_17-C10_17-    | 109.5     |
| C5_17-C4_17-C7_17  | 126.2(2)   | H10C_17            |           |
| C3_17-C4_17-AI5    | 71.91(12)  | H10B_17-C10_17-    | 109.5     |
| C5_17-C4_17-AI5    | 71.01(12)  | H10C_17            |           |
| C7_17-C4_17-AI5    | 123.88(18) | C2_18-C1_18-C5_18  | 107.8(3)  |
| C1_17-C5_17-C4_17  | 107.64(19) | C2_18-C1_18-C10_18 | 126.2(4)  |
| C1_17-C5_17-C6_17  | 125.8(2)   | C5_18-C1_18-C10_18 | 126.0(3)  |
| C4_17-C5_17-C6_17  | 126.5(2)   | C2_18-C1_18-AI4    | 70.3(3)   |
| C1_17-C5_17-AI5    | 70.80(12)  | C5_18-C1_18-AI4    | 70.67(19) |
| C4_17-C5_17-AI5    | 71.45(12)  | C10_18-C1_18-AI4   | 123.7(2)  |
| C6_17-C5_17-AI5    | 122.71(17) | C1_18-C2_18-C3_18  | 108.1(4)  |
| C5_17-C6_17-H6A_17 | 109.5      | C1_18-C2_18-C9_18  | 125.2(4)  |
| C5_17-C6_17-H6B_17 | 109.5      | C3_18-C2_18-C9_18  | 126.7(5)  |
| H6A_17-C6_17-      | 109.5      | C1_18-C2_18-AI4    | 72.4(3)   |
| H6B_17             |            | C3_18-C2_18-AI4    | 69.9(4)   |
| C5_17-C6_17-H6C_17 | 109.5      | C9_18-C2_18-AI4    | 124.4(6)  |
| H6A_17-C6_17-      | 109.5      | C4_18-C3_18-C2_18  | 107.8(4)  |
| H6C_17             |            | C4_18-C3_18-C8_18  | 127.2(5)  |
| H6B_17-C6_17-      | 109.5      | C2_18-C3_18-C8_18  | 125.0(5)  |
| H6C_17             |            | C4_18-C3_18-AI4    | 70.5(4)   |
| C4_17-C7_17-H7A_17 | 109.5      | C2_18-C3_18-AI4    | 72.1(3)   |
| C4_17-C7_17-H7B_17 | 109.5      | C8_18-C3_18-AI4    | 123.8(5)  |
| H7A_17-C7_17-      | 109.5      | C3_18-C4_18-C5_18  | 108.6(3)  |
| H7B_17             |            | C3_18-C4_18-C7_18  | 123.5(5)  |
| C4_17-C7_17-H7C_17 | 109.5      | C5_18-C4_18-C7_18  | 127.6(4)  |
| H7A_17-C7_17-      | 109.5      | C3_18-C4_18-AI4    | 71.5(4)   |
| H7C_17             |            | C5_18-C4_18-AI4    | 73.2(2)   |
| H7B_17-C7_17-      | 109.5      | C7_18-C4_18-AI4    | 126.2(3)  |
| H7C_17             |            | C4_18-C5_18-C1_18  | 107.7(3)  |
| C3_17-C8_17-H8A_17 | 109.5      | C4_18-C5_18-C6_18  | 127.5(4)  |
| C3_17-C8_17-H8B_17 | 109.5      | C1_18-C5_18-C6_18  | 124.7(4)  |

|                    |            |                    |            |
|--------------------|------------|--------------------|------------|
| C4_18-C5_18-AI4    | 69.0(2)    | C2_19-C1_19-AI6    | 70.94(11)  |
| C1_18-C5_18-AI4    | 71.87(19)  | C10_19-C1_19-AI6   | 128.22(14) |
| C6_18-C5_18-AI4    | 124.5(2)   | C3_19-C2_19-C1_19  | 107.90(18) |
| C5_18-C6_18-H6A_18 | 109.5      | C3_19-C2_19-C9_19  | 126.1(2)   |
| C5_18-C6_18-H6B_18 | 109.5      | C1_19-C2_19-C9_19  | 125.6(2)   |
| H6A_18-C6_18-      |            | C3_19-C2_19-AI6    | 71.56(12)  |
| H6B_18             | 109.5      | C1_19-C2_19-AI6    | 71.15(11)  |
| C5_18-C6_18-H6C_18 | 109.5      | C9_19-C2_19-AI6    | 127.82(15) |
| H6A_18-C6_18-      |            | C4_19-C3_19-C2_19  | 107.89(19) |
| H6C_18             | 109.5      | C4_19-C3_19-C8_19  | 125.8(2)   |
| H6B_18-C6_18-      |            | C2_19-C3_19-C8_19  | 126.3(2)   |
| H6C_18             | 109.5      | C4_19-C3_19-AI6    | 71.53(12)  |
| C4_18-C7_18-H7A_18 | 109.5      | C2_19-C3_19-AI6    | 70.78(12)  |
| C4_18-C7_18-H7B_18 | 109.5      | C8_19-C3_19-AI6    | 125.31(17) |
| H7A_18-C7_18-      |            | C3_19-C4_19-C5_19  | 108.55(18) |
| H7B_18             | 109.5      | C3_19-C4_19-C7_19  | 126.2(2)   |
| C4_18-C7_18-H7C_18 | 109.5      | C5_19-C4_19-C7_19  | 125.2(2)   |
| H7A_18-C7_18-      |            | C3_19-C4_19-AI6    | 71.14(12)  |
| H7C_18             | 109.5      | C5_19-C4_19-AI6    | 71.38(12)  |
| H7B_18-C7_18-      |            | C7_19-C4_19-AI6    | 123.22(16) |
| H7C_18             | 109.5      | C4_19-C5_19-C1_19  | 107.89(18) |
| C3_18-C8_18-H8A_18 | 109.5      | C4_19-C5_19-C6_19  | 125.45(19) |
| C3_18-C8_18-H8B_18 | 109.5      | C1_19-C5_19-C6_19  | 126.7(2)   |
| H8A_18-C8_18-      |            | C4_19-C5_19-AI6    | 71.27(11)  |
| H8B_18             | 109.5      | C1_19-C5_19-AI6    | 70.68(11)  |
| C3_18-C8_18-H8C_18 | 109.5      | C6_19-C5_19-AI6    | 123.86(15) |
| H8A_18-C8_18-      |            | C5_19-C6_19-H6A_19 | 109.5      |
| H8C_18             | 109.5      | C5_19-C6_19-H6B_19 | 109.5      |
| H8B_18-C8_18-      |            | H6A_19-C6_19-      |            |
| H8C_18             | 109.5      | H6B_19             | 109.5      |
| C2_18-C9_18-H9A_18 | 109.5      | C5_19-C6_19-H6C_19 | 109.5      |
| C2_18-C9_18-H9B_18 | 109.5      | H6A_19-C6_19-      |            |
| H9A_18-C9_18-      |            | H6C_19             | 109.5      |
| H9B_18             | 109.5      | H6B_19-C6_19-      |            |
| C2_18-C9_18-H9C_18 | 109.5      | H6C_19             | 109.5      |
| H9A_18-C9_18-      |            | C4_19-C7_19-H7A_19 | 109.5      |
| H9C_18             | 109.5      | C4_19-C7_19-H7B_19 | 109.5      |
| H9B_18-C9_18-      |            | H7A_19-C7_19-      |            |
| H9C_18             | 109.5      | H7B_19             | 109.5      |
| C1_18-C10_18-      |            | C4_19-C7_19-H7C_19 | 109.5      |
| H10A_18            | 109.5      | H7A_19-C7_19-      |            |
| C1_18-C10_18-      |            | H7C_19             | 109.5      |
| H10B_18            | 109.5      | H7B_19-C7_19-      |            |
| H10A_18-C10_18-    |            | H7C_19             | 109.5      |
| H10B_18            | 109.5      | C3_19-C8_19-H8A_19 | 109.5      |
| C1_18-C10_18-      |            | C3_19-C8_19-H8B_19 | 109.5      |
| H10C_18            | 109.5      | H8A_19-C8_19-      |            |
| H10A_18-C10_18-    |            | H8B_19             | 109.5      |
| H10C_18            | 109.5      | C3_19-C8_19-H8C_19 | 109.5      |
| H10B_18-C10_18-    |            | H8A_19-C8_19-      |            |
| H10C_18            | 109.5      | H8C_19             | 109.5      |
| C5_19-C1_19-C2_19  | 107.76(18) | H8B_19-C8_19-      |            |
| C5_19-C1_19-C10_19 | 126.34(19) | H8C_19             | 109.5      |
| C2_19-C1_19-C10_19 | 125.53(18) | C2_19-C9_19-H9A_19 | 109.5      |
| C5_19-C1_19-AI6    | 71.74(11)  | C2_19-C9_19-H9B_19 | 109.5      |

|                            |            |                            |            |
|----------------------------|------------|----------------------------|------------|
| H9A_19-C9_19-<br>H9B_19    | 109.5      | H6A_20-C6_20-<br>H6C_20    | 109.5      |
| C2_19-C9_19-H9C_19         | 109.5      | H6B_20-C6_20-<br>H6C_20    | 109.5      |
| H9A_19-C9_19-<br>H9C_19    | 109.5      | C4_20-C7_20-H7A_20         | 109.5      |
| H9B_19-C9_19-<br>H9C_19    | 109.5      | C4_20-C7_20-H7B_20         | 109.5      |
| C1_19-C10_19-<br>H10A_19   | 109.5      | H7A_20-C7_20-<br>H7B_20    | 109.5      |
| C1_19-C10_19-<br>H10B_19   | 109.5      | C4_20-C7_20-H7C_20         | 109.5      |
| H10A_19-C10_19-<br>H10B_19 | 109.5      | H7A_20-C7_20-<br>H7C_20    | 109.5      |
| C1_19-C10_19-<br>H10C_19   | 109.5      | H7B_20-C7_20-<br>H7C_20    | 109.5      |
| H10A_19-C10_19-<br>H10C_19 | 109.5      | C3_20-C8_20-H8A_20         | 109.5      |
| H10B_19-C10_19-<br>H10C_19 | 109.5      | C3_20-C8_20-H8B_20         | 109.5      |
| C5_20-C1_20-C2_20          | 108.5(2)   | H8A_20-C8_20-<br>H8B_20    | 109.5      |
| C5_20-C1_20-C10_20         | 127.5(3)   | C3_20-C8_20-H8C_20         | 109.5      |
| C2_20-C1_20-C10_20         | 124.0(3)   | H8A_20-C8_20-<br>H8C_20    | 109.5      |
| C5_20-C1_20-AI2            | 70.84(15)  | H8B_20-C8_20-<br>H8C_20    | 109.5      |
| C2_20-C1_20-AI2            | 71.91(13)  | C2_20-C9_20-H9A_20         | 109.5      |
| C10_20-C1_20-AI2           | 123.49(19) | C2_20-C9_20-H9B_20         | 109.5      |
| C1_20-C2_20-C3_20          | 107.3(2)   | H9A_20-C9_20-<br>H9B_20    | 109.5      |
| C1_20-C2_20-C9_20          | 125.6(2)   | C2_20-C9_20-H9C_20         | 109.5      |
| C3_20-C2_20-C9_20          | 127.1(2)   | H9A_20-C9_20-<br>H9C_20    | 109.5      |
| C1_20-C2_20-AI2            | 71.04(13)  | H9B_20-C9_20-<br>H9C_20    | 109.5      |
| C3_20-C2_20-AI2            | 70.68(12)  | C1_20-C10_20-<br>H10A_20   | 109.5      |
| C9_20-C2_20-AI2            | 125.37(18) | C1_20-C10_20-<br>H10B_20   | 109.5      |
| C4_20-C3_20-C2_20          | 108.8(2)   | H10A_20-C10_20-<br>H10B_20 | 109.5      |
| C4_20-C3_20-C8_20          | 123.4(2)   | C1_20-C10_20-<br>H10C_20   | 109.5      |
| C2_20-C3_20-C8_20          | 127.6(2)   | H10A_20-C10_20-<br>H10C_20 | 109.5      |
| C4_20-C3_20-AI2            | 70.94(12)  | H10B_20-C10_20-<br>H10C_20 | 109.5      |
| C2_20-C3_20-AI2            | 72.05(12)  | C5_21-C1_21-C2_21          | 107.87(19) |
| C8_20-C3_20-AI2            | 127.08(15) | C5_21-C1_21-C10_21         | 125.5(3)   |
| C3_20-C4_20-C5_20          | 107.1(2)   | C2_21-C1_21-C10_21         | 126.6(3)   |
| C3_20-C4_20-C7_20          | 124.6(2)   | C5_21-C1_21-AI1            | 71.23(12)  |
| C5_20-C4_20-C7_20          | 128.1(2)   | C2_21-C1_21-AI1            | 70.99(12)  |
| C3_20-C4_20-AI2            | 71.65(13)  | C10_21-C1_21-AI1           | 124.18(19) |
| C5_20-C4_20-AI2            | 71.22(14)  | C1_21-C2_21-C3_21          | 107.78(19) |
| C7_20-C4_20-AI2            | 127.19(18) | C1_21-C2_21-C9_21          | 126.8(2)   |
| C1_20-C5_20-C4_20          | 108.3(2)   | C3_21-C2_21-C9_21          | 125.1(2)   |
| C1_20-C5_20-C6_20          | 127.2(3)   | C1_21-C2_21-AI1            | 71.80(12)  |
| C4_20-C5_20-C6_20          | 124.5(3)   | C3_21-C2_21-AI1            | 70.78(12)  |
| C1_20-C5_20-AI2            | 71.96(14)  | C9_21-C2_21-AI1            | 127.62(16) |
| C4_20-C5_20-AI2            | 71.11(13)  |                            |            |
| C6_20-C5_20-AI2            | 123.92(19) |                            |            |
| C5_20-C6_20-H6A_20         | 109.5      |                            |            |
| C5_20-C6_20-H6B_20         | 109.5      |                            |            |
| H6A_20-C6_20-<br>H6B_20    | 109.5      |                            |            |
| C5_20-C6_20-H6C_20         | 109.5      |                            |            |

|                    |            |
|--------------------|------------|
| C4_21-C3_21-C2_21  | 108.27(19) |
| C4_21-C3_21-C8_21  | 126.8(2)   |
| C2_21-C3_21-C8_21  | 124.8(2)   |
| C4_21-C3_21-A1     | 71.97(12)  |
| C2_21-C3_21-A1     | 71.75(12)  |
| C8_21-C3_21-A1     | 124.65(15) |
| C3_21-C4_21-C5_21  | 107.86(19) |
| C3_21-C4_21-C7_21  | 126.3(3)   |
| C5_21-C4_21-C7_21  | 125.7(3)   |
| C3_21-C4_21-A1     | 70.81(12)  |
| C5_21-C4_21-A1     | 71.52(13)  |
| C7_21-C4_21-A1     | 126.02(17) |
| C1_21-C5_21-C4_21  | 108.23(19) |
| C1_21-C5_21-C6_21  | 126.1(3)   |
| C4_21-C5_21-C6_21  | 125.7(3)   |
| C1_21-C5_21-A1     | 71.64(13)  |
| C4_21-C5_21-A1     | 71.28(12)  |
| C6_21-C5_21-A1     | 124.39(18) |
| C5_21-C6_21-H6A_21 | 109.5      |
| C5_21-C6_21-H6B_21 | 109.5      |
| H6A_21-C6_21-      | 109.5      |
| H6B_21             |            |
| C5_21-C6_21-H6C_21 | 109.5      |
| H6A_21-C6_21-      | 109.5      |
| H6C_21             |            |
| H6B_21-C6_21-      | 109.5      |
| H6C_21             |            |
| C4_21-C7_21-H7A_21 | 109.5      |
| C4_21-C7_21-H7B_21 | 109.5      |
| H7A_21-C7_21-      | 109.5      |
| H7B_21             |            |
| C4_21-C7_21-H7C_21 | 109.5      |
| H7A_21-C7_21-      | 109.5      |
| H7C_21             |            |
| H7B_21-C7_21-      | 109.5      |
| H7C_21             |            |
| C3_21-C8_21-H8A_21 | 109.5      |
| C3_21-C8_21-H8B_21 | 109.5      |
| H8A_21-C8_21-      | 109.5      |
| H8B_21             |            |
| C3_21-C8_21-H8C_21 | 109.5      |
| H8A_21-C8_21-      | 109.5      |
| H8C_21             |            |
| H8B_21-C8_21-      | 109.5      |
| H8C_21             |            |
| C2_21-C9_21-H9A_21 | 109.5      |
| C2_21-C9_21-H9B_21 | 109.5      |
| H9A_21-C9_21-      | 109.5      |
| H9B_21             |            |
| C2_21-C9_21-H9C_21 | 109.5      |
| H9A_21-C9_21-      | 109.5      |
| H9C_21             |            |
| H9B_21-C9_21-      | 109.5      |
| H9C_21             |            |

|                    |            |
|--------------------|------------|
| C1_21-C10_21-      | 109.5      |
| H10A_21            |            |
| C1_21-C10_21-      | 109.5      |
| H10B_21            |            |
| H10A_21-C10_21-    | 109.5      |
| H10B_21            |            |
| C1_21-C10_21-      | 109.5      |
| H10C_21            |            |
| H10A_21-C10_21-    | 109.5      |
| H10C_21            |            |
| H10B_21-C10_21-    | 109.5      |
| H10C_21            |            |
| C2_22-C1_22-C5_22  | 107.8(2)   |
| C2_22-C1_22-C10_22 | 124.9(2)   |
| C5_22-C1_22-C10_22 | 126.9(2)   |
| C2_22-C1_22-A13    | 70.87(12)  |
| C5_22-C1_22-A13    | 71.98(12)  |
| C10_22-C1_22-A13   | 128.25(16) |
| C1_22-C2_22-C3_22  | 107.44(19) |
| C1_22-C2_22-C9_22  | 125.9(2)   |
| C3_22-C2_22-C9_22  | 126.6(2)   |
| C1_22-C2_22-A13    | 71.59(12)  |
| C3_22-C2_22-A13    | 71.70(12)  |
| C9_22-C2_22-A13    | 124.24(15) |
| C4_22-C3_22-C2_22  | 108.7(2)   |
| C4_22-C3_22-C8_22  | 124.6(2)   |
| C2_22-C3_22-C8_22  | 126.8(2)   |
| C4_22-C3_22-A13    | 72.04(13)  |
| C2_22-C3_22-A13    | 70.67(11)  |
| C8_22-C3_22-A13    | 124.50(16) |
| C5_22-C4_22-C3_22  | 107.9(2)   |
| C5_22-C4_22-C7_22  | 127.9(2)   |
| C3_22-C4_22-C7_22  | 124.2(2)   |
| C5_22-C4_22-A13    | 71.59(13)  |
| C3_22-C4_22-A13    | 70.88(12)  |
| C7_22-C4_22-A13    | 123.17(16) |
| C4_22-C5_22-C1_22  | 108.1(2)   |
| C4_22-C5_22-C6_22  | 126.3(3)   |
| C1_22-C5_22-C6_22  | 125.5(3)   |
| C4_22-C5_22-A13    | 71.50(13)  |
| C1_22-C5_22-A13    | 70.44(12)  |
| C6_22-C5_22-A13    | 126.45(16) |
| C5_22-C6_22-H6A_22 | 109.5      |
| C5_22-C6_22-H6B_22 | 109.5      |
| H6A_22-C6_22-      | 109.5      |
| H6B_22             |            |
| C5_22-C6_22-H6C_22 | 109.5      |
| H6A_22-C6_22-      | 109.5      |
| H6C_22             |            |
| H6B_22-C6_22-      | 109.5      |
| H6C_22             |            |
| C4_22-C7_22-H7A_22 | 109.5      |
| C4_22-C7_22-H7B_22 | 109.5      |
| H7A_22-C7_22-      | 109.5      |
| H7B_22             |            |



|                    |            |                    |           |
|--------------------|------------|--------------------|-----------|
| C4_22-C7_22-H7C_22 | 109.5      | C3_23-C4_23-C7_23  | 125.8(3)  |
| H7A_22-C7_22-      |            | C5_23-C4_23-AI8    | 71.95(17) |
| H7C_22             | 109.5      | C3_23-C4_23-AI8    | 72.06(16) |
| H7B_22-C7_22-      |            | C7_23-C4_23-AI8    | 124.8(2)  |
| H7C_22             | 109.5      | C4_23-C5_23-C1_23  | 108.4(3)  |
| C3_22-C8_22-H8A_22 | 109.5      | C4_23-C5_23-C6_23  | 127.1(3)  |
| C3_22-C8_22-H8B_22 | 109.5      | C1_23-C5_23-C6_23  | 124.6(3)  |
| H8A_22-C8_22-      |            | C4_23-C5_23-AI8    | 70.49(17) |
| H8B_22             | 109.5      | C1_23-C5_23-AI8    | 72.24(19) |
| C3_22-C8_22-H8C_22 | 109.5      | C6_23-C5_23-AI8    | 124.3(3)  |
| H8A_22-C8_22-      |            | C5_23-C6_23-H6A_23 | 109.5     |
| H8C_22             | 109.5      | C5_23-C6_23-H6B_23 | 109.5     |
| H8B_22-C8_22-      |            | H6A_23-C6_23-      |           |
| H8C_22             | 109.5      | H6B_23             | 109.5     |
| C2_22-C9_22-H9A_22 | 109.5      | C5_23-C6_23-H6C_23 | 109.5     |
| C2_22-C9_22-H9B_22 | 109.5      | H6A_23-C6_23-      |           |
| H9A_22-C9_22-      |            | H6C_23             | 109.5     |
| H9B_22             | 109.5      | H6B_23-C6_23-      |           |
| C2_22-C9_22-H9C_22 | 109.5      | H6C_23             | 109.5     |
| H9A_22-C9_22-      |            | C4_23-C7_23-H7A_23 | 109.5     |
| H9C_22             | 109.5      | C4_23-C7_23-H7B_23 | 109.5     |
| H9B_22-C9_22-      |            | H7A_23-C7_23-      |           |
| H9C_22             | 109.5      | H7B_23             | 109.5     |
| C1_22-C10_22-      |            | C4_23-C7_23-H7C_23 | 109.5     |
| H10A_22            | 109.5      | H7A_23-C7_23-      |           |
| C1_22-C10_22-      |            | H7C_23             | 109.5     |
| H10B_22            | 109.5      | H7B_23-C7_23-      |           |
| H10A_22-C10_22-    |            | H7C_23             | 109.5     |
| H10B_22            | 109.5      | C3_23-C8_23-H8A_23 | 109.5     |
| C1_22-C10_22-      |            | C3_23-C8_23-H8B_23 | 109.5     |
| H10C_22            | 109.5      | H8A_23-C8_23-      |           |
| H10A_22-C10_22-    |            | H8B_23             | 109.5     |
| H10C_22            | 109.5      | C3_23-C8_23-H8C_23 | 109.5     |
| H10B_22-C10_22-    |            | H8A_23-C8_23-      |           |
| H10C_22            | 109.5      | H8C_23             | 109.5     |
| C2_23-C1_23-C5_23  | 107.9(2)   | H8B_23-C8_23-      |           |
| C2_23-C1_23-C10_23 | 125.7(3)   | H8C_23             | 109.5     |
| C5_23-C1_23-C10_23 | 126.4(3)   | C2_23-C9_23-H9A_23 | 109.5     |
| C2_23-C1_23-AI8    | 72.02(16)  | C2_23-C9_23-H9B_23 | 109.5     |
| C5_23-C1_23-AI8    | 70.47(19)  | H9A_23-C9_23-      |           |
| C10_23-C1_23-AI8   | 123.5(2)   | H9B_23             | 109.5     |
| C1_23-C2_23-C3_23  | 108.7(2)   | C2_23-C9_23-H9C_23 | 109.5     |
| C1_23-C2_23-C9_23  | 125.1(3)   | H9A_23-C9_23-      |           |
| C3_23-C2_23-C9_23  | 126.1(3)   | H9C_23             | 109.5     |
| C1_23-C2_23-AI8    | 71.19(16)  | H9B_23-C9_23-      |           |
| C3_23-C2_23-AI8    | 70.59(15)  | H9C_23             | 109.5     |
| C9_23-C2_23-AI8    | 125.39(19) | C1_23-C10_23-      |           |
| C2_23-C3_23-C4_23  | 107.4(2)   | H10A_23            | 109.5     |
| C2_23-C3_23-C8_23  | 127.0(3)   | C1_23-C10_23-      |           |
| C4_23-C3_23-C8_23  | 125.2(3)   | H10B_23            | 109.5     |
| C2_23-C3_23-AI8    | 72.41(15)  | H10A_23-C10_23-    |           |
| C4_23-C3_23-AI8    | 69.87(16)  | H10B_23            | 109.5     |
| C8_23-C3_23-AI8    | 128.5(2)   | C1_23-C10_23-      |           |
| C5_23-C4_23-C3_23  | 107.6(2)   | H10C_23            | 109.5     |
| C5_23-C4_23-C7_23  | 126.5(3)   |                    |           |

|                            |            |                                               |            |
|----------------------------|------------|-----------------------------------------------|------------|
| H10A_23-C10_23-<br>H10C_23 | 109.5      | H8A_24-C8_24-<br>H8B_24                       | 109.5      |
| H10B_23-C10_23-<br>H10C_23 | 109.5      | C3_24-C8_24-H8C_24<br>H8A_24-C8_24-<br>H8C_24 | 109.5      |
| C5_24-C1_24-C2_24          | 108.04(19) | H8B_24-C8_24-<br>H8C_24                       | 109.5      |
| C5_24-C1_24-C10_24         | 125.1(2)   | C2_24-C9_24-H9A_24                            | 109.5      |
| C2_24-C1_24-C10_24         | 126.9(2)   | C2_24-C9_24-H9B_24                            | 109.5      |
| C5_24-C1_24-A17            | 71.80(12)  | H9A_24-C9_24-<br>H9B_24                       | 109.5      |
| C2_24-C1_24-A17            | 70.66(12)  | C2_24-C9_24-H9C_24                            | 109.5      |
| C10_24-C1_24-A17           | 124.27(16) | H9A_24-C9_24-<br>H9C_24                       | 109.5      |
| C3_24-C2_24-C1_24          | 107.84(19) | H9B_24-C9_24-<br>H9C_24                       | 109.5      |
| C3_24-C2_24-C9_24          | 125.8(2)   | C1_24-C10_24-<br>H10A_24                      | 109.5      |
| C1_24-C2_24-C9_24          | 126.4(2)   | C1_24-C10_24-<br>H10B_24                      | 109.5      |
| C3_24-C2_24-A17            | 71.83(12)  | H10A_24-C10_24-<br>H10B_24                    | 109.5      |
| C1_24-C2_24-A17            | 71.74(12)  | C1_24-C10_24-<br>H10C_24                      | 109.5      |
| C9_24-C2_24-A17            | 124.12(16) | H10A_24-C10_24-<br>H10C_24                    | 109.5      |
| C2_24-C3_24-C4_24          | 107.89(19) | H10B_24-C10_24-<br>H10C_24                    | 109.5      |
| C2_24-C3_24-C8_24          | 125.6(3)   | C2_25-C1_25-C5_25                             | 108.49(17) |
| C4_24-C3_24-C8_24          | 126.2(3)   | C2_25-C1_25-C10_25                            | 125.8(2)   |
| C2_24-C3_24-A17            | 70.67(12)  | C5_25-C1_25-C10_25                            | 125.6(2)   |
| C4_24-C3_24-A17            | 71.82(12)  | C2_25-C1_25-A19                               | 71.86(11)  |
| C8_24-C3_24-A17            | 127.77(17) | C5_25-C1_25-A19                               | 71.03(11)  |
| C5_24-C4_24-C3_24          | 108.08(19) | C10_25-C1_25-A19                              | 125.76(14) |
| C5_24-C4_24-C7_24          | 125.5(2)   | C1_25-C2_25-C3_25                             | 107.65(17) |
| C3_24-C4_24-C7_24          | 126.4(2)   | C1_25-C2_25-C9_25                             | 125.60(19) |
| C5_24-C4_24-A17            | 71.40(12)  | C3_25-C2_25-C9_25                             | 126.7(2)   |
| C3_24-C4_24-A17            | 70.76(12)  | C1_25-C2_25-A19                               | 70.76(11)  |
| C7_24-C4_24-A17            | 124.83(17) | C3_25-C2_25-A19                               | 70.67(11)  |
| C4_24-C5_24-C1_24          | 108.14(18) | C9_25-C2_25-A19                               | 126.27(15) |
| C4_24-C5_24-C6_24          | 126.5(2)   | C4_25-C3_25-C2_25                             | 108.11(17) |
| C1_24-C5_24-C6_24          | 125.3(2)   | C4_25-C3_25-C8_25                             | 124.67(18) |
| C4_24-C5_24-A17            | 71.64(12)  | C2_25-C3_25-C8_25                             | 126.74(19) |
| C1_24-C5_24-A17            | 70.91(11)  | C4_25-C3_25-A19                               | 70.69(11)  |
| C6_24-C5_24-A17            | 125.32(15) | C2_25-C3_25-A19                               | 71.86(11)  |
| C5_24-C6_24-H6A_24         | 109.5      | C8_25-C3_25-A19                               | 129.30(15) |
| C5_24-C6_24-H6B_24         | 109.5      | C5_25-C4_25-C3_25                             | 108.06(17) |
| H6A_24-C6_24-<br>H6B_24    | 109.5      | C5_25-C4_25-C7_25                             | 126.9(2)   |
| C5_24-C6_24-H6C_24         | 109.5      | C3_25-C4_25-C7_25                             | 124.78(19) |
| H6A_24-C6_24-<br>H6C_24    | 109.5      | C5_25-C4_25-A19                               | 71.46(11)  |
| H6B_24-C6_24-<br>H6C_24    | 109.5      | C3_25-C4_25-A19                               | 71.61(11)  |
| C4_24-C7_24-H7A_24         | 109.5      | C7_25-C4_25-A19                               | 126.82(15) |
| C4_24-C7_24-H7B_24         | 109.5      | C1_25-C5_25-C4_25                             | 107.69(18) |
| H7A_24-C7_24-<br>H7B_24    | 109.5      | C1_25-C5_25-C6_25                             | 125.58(18) |
| C4_24-C7_24-H7C_24         | 109.5      | C4_25-C5_25-C6_25                             | 126.71(19) |
| H7A_24-C7_24-<br>H7C_24    | 109.5      |                                               |            |
| H7B_24-C7_24-<br>H7C_24    | 109.5      |                                               |            |
| C3_24-C8_24-H8A_24         | 109.5      |                                               |            |
| C3_24-C8_24-H8B_24         | 109.5      |                                               |            |

|                    |            |                    |           |
|--------------------|------------|--------------------|-----------|
| C1_25-C5_25-AI9    | 71.39(11)  | C5_26-C1_26-AI12   | 70.7(5)   |
| C4_25-C5_25-AI9    | 70.82(11)  | C10_26-C1_26-AI12  | 123.7(5)  |
| C6_25-C5_25-AI9    | 124.37(14) | C1_26-C2_26-C3_26  | 108.5(5)  |
| C5_25-C6_25-H6A_25 | 109.5      | C1_26-C2_26-C9_26  | 124.8(6)  |
| C5_25-C6_25-H6B_25 | 109.5      | C3_26-C2_26-C9_26  | 126.6(6)  |
| H6A_25-C6_25-      | 109.5      | C1_26-C2_26-AI12   | 71.4(4)   |
| H6B_25             | 109.5      | C3_26-C2_26-AI12   | 71.2(4)   |
| C5_25-C6_25-H6C_25 | 109.5      | C9_26-C2_26-AI12   | 126.5(6)  |
| H6A_25-C6_25-      | 109.5      | C4_26-C3_26-C2_26  | 107.7(6)  |
| H6C_25             | 109.5      | C4_26-C3_26-C8_26  | 125.9(6)  |
| H6B_25-C6_25-      | 109.5      | C2_26-C3_26-C8_26  | 125.8(6)  |
| H6C_25             | 109.5      | C4_26-C3_26-AI12   | 71.2(7)   |
| C4_25-C7_25-H7A_25 | 109.5      | C2_26-C3_26-AI12   | 71.4(4)   |
| C4_25-C7_25-H7B_25 | 109.5      | C8_26-C3_26-AI12   | 129.9(6)  |
| H7A_25-C7_25-      | 109.5      | C5_26-C4_26-C3_26  | 107.9(6)  |
| H7B_25             | 109.5      | C5_26-C4_26-C7_26  | 127.4(6)  |
| C4_25-C7_25-H7C_25 | 109.5      | C3_26-C4_26-C7_26  | 124.6(6)  |
| H7A_25-C7_25-      | 109.5      | C5_26-C4_26-AI12   | 71.0(7)   |
| H7C_25             | 109.5      | C3_26-C4_26-AI12   | 71.4(6)   |
| H7B_25-C7_25-      | 109.5      | C7_26-C4_26-AI12   | 125.8(11) |
| H7C_25             | 109.5      | C4_26-C5_26-C1_26  | 108.4(5)  |
| C3_25-C8_25-H8A_25 | 109.5      | C4_26-C5_26-C6_26  | 126.5(6)  |
| C3_25-C8_25-H8B_25 | 109.5      | C1_26-C5_26-C6_26  | 125.1(5)  |
| H8A_25-C8_25-      | 109.5      | C4_26-C5_26-AI12   | 71.7(8)   |
| H8B_25             | 109.5      | C1_26-C5_26-AI12   | 71.7(5)   |
| C3_25-C8_25-H8C_25 | 109.5      | C6_26-C5_26-AI12   | 120.8(7)  |
| H8A_25-C8_25-      | 109.5      | C5_26-C6_26-H6A_26 | 109.5     |
| H8C_25             | 109.5      | C5_26-C6_26-H6B_26 | 109.5     |
| H8B_25-C8_25-      | 109.5      | H6A_26-C6_26-      | 109.5     |
| H8C_25             | 109.5      | H6B_26             | 109.5     |
| C2_25-C9_25-H9A_25 | 109.5      | C5_26-C6_26-H6C_26 | 109.5     |
| C2_25-C9_25-H9B_25 | 109.5      | H6A_26-C6_26-      | 109.5     |
| H9A_25-C9_25-      | 109.5      | H6C_26             | 109.5     |
| H9B_25             | 109.5      | H6B_26-C6_26-      | 109.5     |
| C2_25-C9_25-H9C_25 | 109.5      | H6C_26             | 109.5     |
| H9A_25-C9_25-      | 109.5      | C4_26-C7_26-H7A_26 | 109.5     |
| H9C_25             | 109.5      | C4_26-C7_26-H7B_26 | 109.5     |
| H9B_25-C9_25-      | 109.5      | H7A_26-C7_26-      | 109.5     |
| H9C_25             | 109.5      | H7B_26             | 109.5     |
| C1_25-C10_25-      | 109.5      | C4_26-C7_26-H7C_26 | 109.5     |
| H10A_25            | 109.5      | H7A_26-C7_26-      | 109.5     |
| C1_25-C10_25-      | 109.5      | H7C_26             | 109.5     |
| H10B_25            | 109.5      | H7B_26-C7_26-      | 109.5     |
| H10A_25-C10_25-    | 109.5      | H7C_26             | 109.5     |
| H10B_25            | 109.5      | C3_26-C8_26-H8A_26 | 109.5     |
| C1_25-C10_25-      | 109.5      | C3_26-C8_26-H8B_26 | 109.5     |
| H10C_25            | 109.5      | H8A_26-C8_26-      | 109.5     |
| H10A_25-C10_25-    | 109.5      | H8B_26             | 109.5     |
| H10C_25            | 109.5      | C3_26-C8_26-H8C_26 | 109.5     |
| H10B_25-C10_25-    | 109.5      | H8A_26-C8_26-      | 109.5     |
| H10C_25            | 109.5      | H8C_26             | 109.5     |
| C2_26-C1_26-C5_26  | 107.6(5)   | H8B_26-C8_26-      | 109.5     |
| C2_26-C1_26-C10_26 | 128.0(5)   | H8C_26             | 109.5     |
| C5_26-C1_26-C10_26 | 124.3(5)   | C2_26-C9_26-H9A_26 | 109.5     |
| C2_26-C1_26-AI12   | 71.6(4)    | C2_26-C9_26-H9B_26 | 109.5     |

|                    |            |                    |           |
|--------------------|------------|--------------------|-----------|
| H9A_26-C9_26-      | 109.5      | H6A_27-C6_27-      | 109.5     |
| H9B_26             |            | H6C_27             |           |
| C2_26-C9_26-H9C_26 | 109.5      | H6B_27-C6_27-      | 109.5     |
| H9A_26-C9_26-      | 109.5      | H6C_27             |           |
| H9C_26             |            | C4_27-C7_27-H7A_27 | 109.5     |
| H9B_26-C9_26-      | 109.5      | C4_27-C7_27-H7B_27 | 109.5     |
| H9C_26             |            | H7A_27-C7_27-      | 109.5     |
| C1_26-C10_26-      | 109.5      | H7B_27             |           |
| H10A_26            |            | C4_27-C7_27-H7C_27 | 109.5     |
| C1_26-C10_26-      | 109.5      | H7A_27-C7_27-      | 109.5     |
| H10B_26            |            | H7C_27             |           |
| H10A_26-C10_26-    | 109.5      | H7B_27-C7_27-      | 109.5     |
| H10B_26            |            | H7C_27             |           |
| C1_26-C10_26-      | 109.5      | C3_27-C8_27-H8A_27 | 109.5     |
| H10C_26            |            | C3_27-C8_27-H8B_27 | 109.5     |
| H10A_26-C10_26-    | 109.5      | H8A_27-C8_27-      | 109.5     |
| H10C_26            |            | H8B_27             |           |
| H10B_26-C10_26-    | 109.5      | C3_27-C8_27-H8C_27 | 109.5     |
| H10C_26            |            | H8A_27-C8_27-      | 109.5     |
| C2_27-C1_27-C5_27  | 107.9(2)   | H8C_27             |           |
| C2_27-C1_27-C10_27 | 125.8(2)   | H8B_27-C8_27-      | 109.5     |
| C5_27-C1_27-C10_27 | 126.0(3)   | H8C_27             |           |
| C2_27-C1_27-Al11   | 70.62(12)  | C2_27-C9_27-H9A_27 | 109.5     |
| C5_27-C1_27-Al11   | 72.25(13)  | C2_27-C9_27-H9B_27 | 109.5     |
| C10_27-C1_27-Al11  | 127.21(17) | H9A_27-C9_27-      | 109.5     |
| C3_27-C2_27-C1_27  | 108.19(19) | H9B_27             |           |
| C3_27-C2_27-C9_27  | 126.1(2)   | C2_27-C9_27-H9C_27 | 109.5     |
| C1_27-C2_27-C9_27  | 125.7(2)   | H9A_27-C9_27-      | 109.5     |
| C3_27-C2_27-Al11   | 71.96(12)  | H9C_27             |           |
| C1_27-C2_27-Al11   | 71.63(12)  | H9B_27-C9_27-      | 109.5     |
| C9_27-C2_27-Al11   | 124.10(16) | H9C_27             |           |
| C2_27-C3_27-C4_27  | 107.7(2)   | C1_27-C10_27-      | 109.5     |
| C2_27-C3_27-C8_27  | 126.9(2)   | H10A_27            |           |
| C4_27-C3_27-C8_27  | 125.3(2)   | C1_27-C10_27-      | 109.5     |
| C2_27-C3_27-Al11   | 70.42(12)  | H10B_27            |           |
| C4_27-C3_27-Al11   | 71.91(12)  | H10A_27-C10_27-    | 109.5     |
| C8_27-C3_27-Al11   | 125.13(17) | H10B_27            |           |
| C5_27-C4_27-C3_27  | 108.46(19) | C1_27-C10_27-      | 109.5     |
| C5_27-C4_27-C7_27  | 127.3(2)   | H10C_27            |           |
| C3_27-C4_27-C7_27  | 124.3(2)   | H10A_27-C10_27-    | 109.5     |
| C5_27-C4_27-Al11   | 71.66(12)  | H10C_27            |           |
| C3_27-C4_27-Al11   | 70.64(12)  | H10B_27-C10_27-    | 109.5     |
| C7_27-C4_27-Al11   | 122.67(17) | H10C_27            |           |
| C4_27-C5_27-C1_27  | 107.7(2)   | C1_29-O1_29-Al13   | 146.2(13) |
| C4_27-C5_27-C6_27  | 125.8(2)   | O1_29-C1_29-C2_29  | 109.2(9)  |
| C1_27-C5_27-C6_27  | 126.4(2)   | O1_29-C1_29-C4_29  | 108.4(10) |
| C4_27-C5_27-Al11   | 71.34(13)  | C2_29-C1_29-C4_29  | 110.5(7)  |
| C1_27-C5_27-Al11   | 70.17(12)  | O1_29-C1_29-C3_29  | 112.5(8)  |
| C6_27-C5_27-Al11   | 123.60(17) | C2_29-C1_29-C3_29  | 107.5(6)  |
| C5_27-C6_27-H6A_27 | 109.5      | C4_29-C1_29-C3_29  | 108.8(6)  |
| C5_27-C6_27-H6B_27 | 109.5      | F2_29-C2_29-F3_29  | 114.7(10) |
| H6A_27-C6_27-      | 109.5      | F2_29-C2_29-F1_29  | 107.4(8)  |
| H6B_27             |            | F3_29-C2_29-F1_29  | 103.4(9)  |
| C5_27-C6_27-H6C_27 | 109.5      | F2_29-C2_29-C1_29  | 111.4(7)  |
|                    |            | F3_29-C2_29-C1_29  | 110.0(9)  |

|                   |           |                   |           |
|-------------------|-----------|-------------------|-----------|
| F1_29-C2_29-C1_29 | 109.4(7)  | F4_31-C3_31-C1_31 | 110.6(7)  |
| F5_29-C3_29-F6_29 | 107.6(6)  | F6_31-C3_31-C1_31 | 112.3(7)  |
| F5_29-C3_29-F4_29 | 107.0(6)  | F9_31-C4_31-F7_31 | 105.6(9)  |
| F6_29-C3_29-F4_29 | 108.2(6)  | F9_31-C4_31-F8_31 | 110.1(10) |
| F5_29-C3_29-C1_29 | 111.7(5)  | F7_31-C4_31-F8_31 | 112.7(10) |
| F6_29-C3_29-C1_29 | 111.8(6)  | F9_31-C4_31-C1_31 | 110.5(9)  |
| F4_29-C3_29-C1_29 | 110.3(6)  | F7_31-C4_31-C1_31 | 109.3(8)  |
| F7_29-C4_29-F9_29 | 106.2(8)  | F8_31-C4_31-C1_31 | 108.6(8)  |
| F7_29-C4_29-F8_29 | 108.0(10) | C1_32-O1_32-AI16  | 146.7(15) |
| F9_29-C4_29-F8_29 | 109.0(9)  | O1_32-C1_32-C3_32 | 111.3(11) |
| F7_29-C4_29-C1_29 | 111.3(8)  | O1_32-C1_32-C4_32 | 105.5(10) |
| F9_29-C4_29-C1_29 | 110.5(7)  | C3_32-C1_32-C4_32 | 109.8(6)  |
| F8_29-C4_29-C1_29 | 111.7(8)  | O1_32-C1_32-C2_32 | 111.2(11) |
| C1_30-O1_30-AI13  | 157.6(15) | C3_32-C1_32-C2_32 | 109.5(6)  |
| O1_30-C1_30-C4_30 | 110.1(11) | C4_32-C1_32-C2_32 | 109.4(6)  |
| O1_30-C1_30-C2_30 | 108.4(12) | F3_32-C2_32-F1_32 | 107.8(8)  |
| C4_30-C1_30-C2_30 | 111.4(9)  | F3_32-C2_32-F2_32 | 108.2(9)  |
| O1_30-C1_30-C3_30 | 109.1(12) | F1_32-C2_32-F2_32 | 106.7(6)  |
| C4_30-C1_30-C3_30 | 108.1(8)  | F3_32-C2_32-C1_32 | 110.9(9)  |
| C2_30-C1_30-C3_30 | 109.7(9)  | F1_32-C2_32-C1_32 | 111.4(5)  |
| F2_30-C2_30-F1_30 | 105.7(11) | F2_32-C2_32-C1_32 | 111.7(6)  |
| F2_30-C2_30-F3_30 | 108.5(11) | F4_32-C3_32-F5_32 | 107.5(9)  |
| F1_30-C2_30-F3_30 | 108.5(11) | F4_32-C3_32-F6_32 | 107.1(11) |
| F2_30-C2_30-C1_30 | 112.0(10) | F5_32-C3_32-F6_32 | 107.3(7)  |
| F1_30-C2_30-C1_30 | 110.2(10) | F4_32-C3_32-C1_32 | 111.3(10) |
| F3_30-C2_30-C1_30 | 111.6(10) | F5_32-C3_32-C1_32 | 111.0(5)  |
| F4_30-C3_30-F6_30 | 107.4(10) | F6_32-C3_32-C1_32 | 112.3(7)  |
| F4_30-C3_30-F5_30 | 107.5(10) | F9_32-C4_32-F7_32 | 108.0(9)  |
| F6_30-C3_30-F5_30 | 107.1(10) | F9_32-C4_32-F8_32 | 109.0(12) |
| F4_30-C3_30-C1_30 | 112.2(10) | F7_32-C4_32-F8_32 | 106.6(6)  |
| F6_30-C3_30-C1_30 | 111.6(10) | F9_32-C4_32-C1_32 | 109.6(10) |
| F5_30-C3_30-C1_30 | 110.8(9)  | F7_32-C4_32-C1_32 | 110.8(5)  |
| F7_30-C4_30-F9_30 | 109.2(11) | F8_32-C4_32-C1_32 | 112.7(8)  |
| F7_30-C4_30-F8_30 | 105.3(14) | C1_33-O1_33-AI16  | 148(2)    |
| F9_30-C4_30-F8_30 | 107.0(13) | O1_33-C1_33-C2_33 | 109.2(14) |
| F7_30-C4_30-C1_30 | 112.1(9)  | O1_33-C1_33-C3_33 | 110.9(14) |
| F9_30-C4_30-C1_30 | 112.8(10) | C2_33-C1_33-C3_33 | 110.3(7)  |
| F8_30-C4_30-C1_30 | 110.1(12) | O1_33-C1_33-C4_33 | 108.4(13) |
| C1_31-O1_31-AI13  | 147.5(11) | C2_33-C1_33-C4_33 | 109.5(7)  |
| O1_31-C1_31-C3_31 | 110.7(9)  | C3_33-C1_33-C4_33 | 108.4(7)  |
| O1_31-C1_31-C2_31 | 107.4(8)  | F1_33-C2_33-F3_33 | 109.9(8)  |
| C3_31-C1_31-C2_31 | 108.6(7)  | F1_33-C2_33-F2_33 | 109.2(7)  |
| O1_31-C1_31-C4_31 | 110.0(9)  | F3_33-C2_33-F2_33 | 105.0(9)  |
| C3_31-C1_31-C4_31 | 109.5(7)  | F1_33-C2_33-C1_33 | 111.0(6)  |
| C2_31-C1_31-C4_31 | 110.6(7)  | F3_33-C2_33-C1_33 | 109.1(9)  |
| F2_31-C2_31-F3_31 | 109.4(8)  | F2_33-C2_33-C1_33 | 112.3(8)  |
| F2_31-C2_31-F1_31 | 106.5(8)  | F6_33-C3_33-F4_33 | 108.0(12) |
| F3_31-C2_31-F1_31 | 110.2(8)  | F6_33-C3_33-F5_33 | 105.3(11) |
| F2_31-C2_31-C1_31 | 111.3(8)  | F4_33-C3_33-F5_33 | 110.7(7)  |
| F3_31-C2_31-C1_31 | 109.9(7)  | F6_33-C3_33-C1_33 | 112.3(11) |
| F1_31-C2_31-C1_31 | 109.5(7)  | F4_33-C3_33-C1_33 | 109.2(9)  |
| F5_31-C3_31-F4_31 | 104.2(8)  | F5_33-C3_33-C1_33 | 111.3(7)  |
| F5_31-C3_31-F6_31 | 109.6(8)  | F9_33-C4_33-F7_33 | 100.8(7)  |
| F4_31-C3_31-F6_31 | 108.4(8)  | F9_33-C4_33-F8_33 | 110.1(10) |
| F5_31-C3_31-C1_31 | 111.3(7)  | F7_33-C4_33-F8_33 | 109.5(8)  |

|                   |           |                    |           |
|-------------------|-----------|--------------------|-----------|
| F9_33-C4_33-C1_33 | 113.7(8)  | O1_36-C1_36-C2_36  | 108.3(12) |
| F7_33-C4_33-C1_33 | 111.5(6)  | C4_36-C1_36-C2_36  | 109.6(11) |
| F8_33-C4_33-C1_33 | 110.8(9)  | O1_36-C1_36-C3_36  | 112.3(13) |
| C1_34-O1_34-AI14  | 150.9(12) | C4_36-C1_36-C3_36  | 107.3(11) |
| O1_34-C1_34-C4_34 | 111.6(11) | C2_36-C1_36-C3_36  | 109.0(11) |
| O1_34-C1_34-C2_34 | 108.3(11) | F2_36-C2_36-F1_36  | 111.9(14) |
| C4_34-C1_34-C2_34 | 109.8(11) | F2_36-C2_36-F3_36  | 103.8(13) |
| O1_34-C1_34-C3_34 | 108.3(12) | F1_36-C2_36-F3_36  | 112.9(14) |
| C4_34-C1_34-C3_34 | 110.1(11) | F2_36-C2_36-C1_36  | 110.6(12) |
| C2_34-C1_34-C3_34 | 108.8(12) | F1_36-C2_36-C1_36  | 108.5(12) |
| F2_34-C2_34-F1_34 | 112.2(18) | F3_36-C2_36-C1_36  | 109.0(11) |
| F2_34-C2_34-F3_34 | 107.7(14) | F5_36-C3_36-F6_36  | 112.5(14) |
| F1_34-C2_34-F3_34 | 100.9(16) | F5_36-C3_36-F4_36  | 111.2(14) |
| F2_34-C2_34-C1_34 | 112.1(13) | F6_36-C3_36-F4_36  | 106.4(13) |
| F1_34-C2_34-C1_34 | 112.7(17) | F5_36-C3_36-C1_36  | 105.1(12) |
| F3_34-C2_34-C1_34 | 110.6(12) | F6_36-C3_36-C1_36  | 111.0(12) |
| F6_34-C3_34-F5_34 | 108.1(16) | F4_36-C3_36-C1_36  | 110.8(11) |
| F6_34-C3_34-F4_34 | 107.0(18) | F9_36-C4_36-F8_36  | 109.3(17) |
| F5_34-C3_34-F4_34 | 107.3(16) | F9_36-C4_36-F7_36  | 110.2(16) |
| F6_34-C3_34-C1_34 | 111.5(16) | F8_36-C4_36-F7_36  | 107.8(16) |
| F5_34-C3_34-C1_34 | 111.5(13) | F9_36-C4_36-C1_36  | 109.6(14) |
| F4_34-C3_34-C1_34 | 111.2(15) | F8_36-C4_36-C1_36  | 110.9(15) |
| F9_34-C4_34-F8_34 | 108.6(13) | F7_36-C4_36-C1_36  | 108.9(14) |
| F9_34-C4_34-F7_34 | 105.2(13) | C5_37-C1_37-C2_37  | 108.3(8)  |
| F8_34-C4_34-F7_34 | 106.3(13) | C5_37-C1_37-C10_37 | 124.0(9)  |
| F9_34-C4_34-C1_34 | 110.7(11) | C2_37-C1_37-C10_37 | 127.6(9)  |
| F8_34-C4_34-C1_34 | 113.7(12) | C5_37-C1_37-AI4    | 68.6(10)  |
| F7_34-C4_34-C1_34 | 111.8(12) | C2_37-C1_37-AI4    | 68.8(5)   |
| C1_35-O1_35-AI14  | 150.3(12) | C10_37-C1_37-AI4   | 129.0(6)  |
| O1_35-C1_35-C4_35 | 112.0(12) | C3_37-C2_37-C1_37  | 108.4(7)  |
| O1_35-C1_35-C3_35 | 107.6(11) | C3_37-C2_37-C9_37  | 128.5(10) |
| C4_35-C1_35-C3_35 | 109.9(12) | C1_37-C2_37-C9_37  | 123.1(10) |
| O1_35-C1_35-C2_35 | 109.2(11) | C3_37-C2_37-AI4    | 66.3(4)   |
| C4_35-C1_35-C2_35 | 108.7(11) | C1_37-C2_37-AI4    | 76.8(5)   |
| C3_35-C1_35-C2_35 | 109.4(11) | C9_37-C2_37-AI4    | 124.0(7)  |
| F1_35-C2_35-F2_35 | 105.8(13) | C2_37-C3_37-C4_37  | 107.2(8)  |
| F1_35-C2_35-F3_35 | 108.9(14) | C2_37-C3_37-C8_37  | 128.3(11) |
| F2_35-C2_35-F3_35 | 110.1(14) | C4_37-C3_37-C8_37  | 124.4(11) |
| F1_35-C2_35-C1_35 | 110.6(12) | C2_37-C3_37-AI4    | 77.7(4)   |
| F2_35-C2_35-C1_35 | 112.5(13) | C4_37-C3_37-AI4    | 73.2(11)  |
| F3_35-C2_35-C1_35 | 108.9(11) | C8_37-C3_37-AI4    | 117.0(8)  |
| F6_35-C3_35-F4_35 | 106.9(15) | C5_37-C4_37-C3_37  | 108.4(9)  |
| F6_35-C3_35-F5_35 | 107.4(17) | C5_37-C4_37-C7_37  | 124.1(13) |
| F4_35-C3_35-F5_35 | 110.9(16) | C3_37-C4_37-C7_37  | 127.0(13) |
| F6_35-C3_35-C1_35 | 114.1(16) | C5_37-C4_37-AI4    | 75.5(11)  |
| F4_35-C3_35-C1_35 | 110.8(12) | C3_37-C4_37-AI4    | 69.2(9)   |
| F5_35-C3_35-C1_35 | 106.6(15) | C7_37-C4_37-AI4    | 115.0(18) |
| F9_35-C4_35-F7_35 | 107.8(16) | C1_37-C5_37-C4_37  | 107.3(9)  |
| F9_35-C4_35-F8_35 | 106.9(18) | C1_37-C5_37-C6_37  | 124.0(11) |
| F7_35-C4_35-F8_35 | 105.4(18) | C4_37-C5_37-C6_37  | 127.9(12) |
| F9_35-C4_35-C1_35 | 112.5(15) | C1_37-C5_37-AI4    | 77.0(9)   |
| F7_35-C4_35-C1_35 | 111.3(15) | C4_37-C5_37-AI4    | 68.6(11)  |
| F8_35-C4_35-C1_35 | 112.6(17) | C6_37-C5_37-AI4    | 128.1(15) |
| C1_36-O1_36-AI13  | 150.6(15) | C5_37-C6_37-H6A_37 | 109.5     |
| O1_36-C1_36-C4_36 | 110.3(13) | C5_37-C6_37-H6B_37 | 109.5     |

|                    |           |                    |           |
|--------------------|-----------|--------------------|-----------|
| H6A_37-C6_37-      |           | F3_39-C2_39-F2_39  | 107.1(18) |
| H6B_37             | 109.5     | F1_39-C2_39-C1_39  | 111.5(11) |
| C5_37-C6_37-H6C_37 | 109.5     | F3_39-C2_39-C1_39  | 112.0(15) |
| H6A_37-C6_37-      |           | F2_39-C2_39-C1_39  | 111.7(16) |
| H6C_37             | 109.5     | F4_39-C3_39-F6_39  | 109.9(16) |
| H6B_37-C6_37-      |           | F4_39-C3_39-F5_39  | 103.8(15) |
| H6C_37             | 109.5     | F6_39-C3_39-F5_39  | 104.0(12) |
| C4_37-C7_37-H7A_37 | 109.5     | F4_39-C3_39-C1_39  | 113.7(15) |
| C4_37-C7_37-H7B_37 | 109.5     | F6_39-C3_39-C1_39  | 114.2(12) |
| H7A_37-C7_37-      |           | F5_39-C3_39-C1_39  | 110.3(11) |
| H7B_37             | 109.5     | F9_39-C4_39-F8_39  | 110.1(15) |
| C4_37-C7_37-H7C_37 | 109.5     | F9_39-C4_39-F7_39  | 101.7(16) |
| H7A_37-C7_37-      |           | F8_39-C4_39-F7_39  | 106.9(16) |
| H7C_37             | 109.5     | F9_39-C4_39-C1_39  | 116.4(14) |
| H7B_37-C7_37-      |           | F8_39-C4_39-C1_39  | 111.4(12) |
| H7C_37             | 109.5     | F7_39-C4_39-C1_39  | 109.5(14) |
| C3_37-C8_37-H8A_37 | 109.5     | C5_41-C1_41-C2_41  | 108.4(5)  |
| C3_37-C8_37-H8B_37 | 109.5     | C5_41-C1_41-C10_41 | 127.7(5)  |
| H8A_37-C8_37-      |           | C2_41-C1_41-C10_41 | 123.8(5)  |
| H8B_37             | 109.5     | C5_41-C1_41-Al10   | 69.8(4)   |
| C3_37-C8_37-H8C_37 | 109.5     | C2_41-C1_41-Al10   | 70.9(3)   |
| H8A_37-C8_37-      |           | C10_41-C1_41-Al10  | 128.6(4)  |
| H8C_37             | 109.5     | C3_41-C2_41-C1_41  | 108.5(5)  |
| H8B_37-C8_37-      |           | C3_41-C2_41-C9_41  | 123.6(6)  |
| H8C_37             | 109.5     | C1_41-C2_41-C9_41  | 128.0(6)  |
| C2_37-C9_37-H9A_37 | 109.5     | C3_41-C2_41-Al10   | 69.4(3)   |
| C2_37-C9_37-H9B_37 | 109.5     | C1_41-C2_41-Al10   | 71.2(3)   |
| H9A_37-C9_37-      |           | C9_41-C2_41-Al10   | 126.6(4)  |
| H9B_37             | 109.5     | C2_41-C3_41-C4_41  | 106.7(4)  |
| C2_37-C9_37-H9C_37 | 109.5     | C2_41-C3_41-C8_41  | 126.2(7)  |
| H9A_37-C9_37-      |           | C4_41-C3_41-C8_41  | 127.0(7)  |
| H9C_37             | 109.5     | C2_41-C3_41-Al10   | 72.5(2)   |
| H9B_37-C9_37-      |           | C4_41-C3_41-Al10   | 69.9(3)   |
| H9C_37             | 109.5     | C8_41-C3_41-Al10   | 123.1(4)  |
| C1_37-C10_37-      |           | C5_41-C4_41-C3_41  | 109.3(4)  |
| H10A_37            | 109.5     | C5_41-C4_41-C7_41  | 125.8(7)  |
| C1_37-C10_37-      |           | C3_41-C4_41-C7_41  | 124.9(6)  |
| H10B_37            | 109.5     | C5_41-C4_41-Al10   | 71.9(4)   |
| H10A_37-C10_37-    |           | C3_41-C4_41-Al10   | 71.1(3)   |
| H10B_37            | 109.5     | C7_41-C4_41-Al10   | 122.7(4)  |
| C1_37-C10_37-      |           | C4_41-C5_41-C1_41  | 107.1(5)  |
| H10C_37            | 109.5     | C4_41-C5_41-C6_41  | 130.7(6)  |
| H10A_37-C10_37-    |           | C1_41-C5_41-C6_41  | 122.1(5)  |
| H10C_37            | 109.5     | C4_41-C5_41-Al10   | 69.7(4)   |
| H10B_37-C10_37-    |           | C1_41-C5_41-Al10   | 72.2(3)   |
| H10C_37            | 109.5     | C6_41-C5_41-Al10   | 125.7(5)  |
| C1_39-O1_39-Al15   | 156(2)    | C5_41-C6_41-H6A_41 | 109.5     |
| O1_39-C1_39-C4_39  | 109.7(15) | C5_41-C6_41-H6B_41 | 109.5     |
| O1_39-C1_39-C2_39  | 109.7(15) | H6A_41-C6_41-      | 109.5     |
| C4_39-C1_39-C2_39  | 111.8(11) | H6B_41             | 109.5     |
| O1_39-C1_39-C3_39  | 108.4(14) | C5_41-C6_41-H6C_41 | 109.5     |
| C4_39-C1_39-C3_39  | 106.7(10) | H6A_41-C6_41-      | 109.5     |
| C2_39-C1_39-C3_39  | 110.4(11) | H6C_41             | 109.5     |
| F1_39-C2_39-F3_39  | 109.4(16) | H6B_41-C6_41-      | 109.5     |
| F1_39-C2_39-F2_39  | 104.9(14) | H6C_41             | 109.5     |

|                    |           |                    |          |
|--------------------|-----------|--------------------|----------|
| C4_41-C7_41-H7A_41 | 109.5     | C4_38-C3_38-AI10   | 73.2(4)  |
| C4_41-C7_41-H7B_41 | 109.5     | C8_38-C3_38-AI10   | 124.1(6) |
| H7A_41-C7_41-      |           | C5_38-C4_38-C3_38  | 107.9(6) |
| H7B_41             | 109.5     | C5_38-C4_38-C7_38  | 125.5(8) |
| C4_41-C7_41-H7C_41 | 109.5     | C3_38-C4_38-C7_38  | 126.6(8) |
| H7A_41-C7_41-      |           | C5_38-C4_38-AI10   | 74.6(4)  |
| H7C_41             | 109.5     | C3_38-C4_38-AI10   | 70.0(4)  |
| H7B_41-C7_41-      |           | C7_38-C4_38-AI10   | 122.0(5) |
| H7C_41             | 109.5     | C1_38-C5_38-C4_38  | 109.2(6) |
| C3_41-C8_41-H8A_41 | 109.5     | C1_38-C5_38-C6_38  | 127.1(7) |
| C3_41-C8_41-H8B_41 | 109.5     | C4_38-C5_38-C6_38  | 123.7(7) |
| H8A_41-C8_41-      |           | C1_38-C5_38-AI10   | 71.9(5)  |
| H8B_41             | 109.5     | C4_38-C5_38-AI10   | 69.7(4)  |
| C3_41-C8_41-H8C_41 | 109.5     | C6_38-C5_38-AI10   | 124.3(4) |
| H8A_41-C8_41-      |           | C5_38-C6_38-H6A_38 | 109.5    |
| H8C_41             | 109.5     | C5_38-C6_38-H6B_38 | 109.5    |
| H8B_41-C8_41-      |           | H6A_38-C6_38-      |          |
| H8C_41             | 109.5     | H6B_38             | 109.5    |
| C2_41-C9_41-H9A_41 | 109.5     | C5_38-C6_38-H6C_38 | 109.5    |
| C2_41-C9_41-H9B_41 | 109.5     | H6A_38-C6_38-      |          |
| H9A_41-C9_41-      |           | H6C_38             | 109.5    |
| H9B_41             | 109.5     | H6B_38-C6_38-      |          |
| C2_41-C9_41-H9C_41 | 109.5     | H6C_38             | 109.5    |
| H9A_41-C9_41-      |           | C4_38-C7_38-H7A_38 | 109.5    |
| H9C_41             | 109.5     | C4_38-C7_38-H7B_38 | 109.5    |
| H9B_41-C9_41-      |           | H7A_38-C7_38-      |          |
| H9C_41             | 109.5     | H7B_38             | 109.5    |
| C1_41-C10_41-      |           | C4_38-C7_38-H7C_38 | 109.5    |
| H10A_41            | 109.5     | H7A_38-C7_38-      |          |
| C1_41-C10_41-      |           | H7C_38             | 109.5    |
| H10B_41            | 109.5     | H7B_38-C7_38-      |          |
| H10A_41-C10_41-    |           | H7C_38             | 109.5    |
| H10B_41            | 109.5     | C3_38-C8_38-H8A_38 | 109.5    |
| C1_41-C10_41-      |           | C3_38-C8_38-H8B_38 | 109.5    |
| H10C_41            | 109.5     | H8A_38-C8_38-      |          |
| H10A_41-C10_41-    |           | H8B_38             | 109.5    |
| H10C_41            | 109.5     | C3_38-C8_38-H8C_38 | 109.5    |
| H10B_41-C10_41-    |           | H8A_38-C8_38-      |          |
| H10C_41            | 109.5     | H8C_38             | 109.5    |
| C5_38-C1_38-C2_38  | 106.0(7)  | H8B_38-C8_38-      |          |
| C5_38-C1_38-C10_38 | 122.8(7)  | H8C_38             | 109.5    |
| C2_38-C1_38-C10_38 | 131.2(7)  | C2_38-C9_38-H9A_38 | 109.5    |
| C5_38-C1_38-AI10   | 72.8(4)   | C2_38-C9_38-H9B_38 | 109.5    |
| C2_38-C1_38-AI10   | 69.0(4)   | H9A_38-C9_38-      |          |
| C10_38-C1_38-AI10  | 123.7(6)  | H9B_38             | 109.5    |
| C3_38-C2_38-C1_38  | 109.9(7)  | C2_38-C9_38-H9C_38 | 109.5    |
| C3_38-C2_38-C9_38  | 127.2(9)  | H9A_38-C9_38-      |          |
| C1_38-C2_38-C9_38  | 122.9(9)  | H9C_38             | 109.5    |
| C3_38-C2_38-AI10   | 71.0(4)   | H9B_38-C9_38-      |          |
| C1_38-C2_38-AI10   | 74.7(4)   | H9C_38             | 109.5    |
| C9_38-C2_38-AI10   | 123.6(6)  | C1_38-C10_38-      |          |
| C2_38-C3_38-C4_38  | 107.0(6)  | H10A_38            | 109.5    |
| C2_38-C3_38-C8_38  | 127.8(10) | C1_38-C10_38-      |          |
| C4_38-C3_38-C8_38  | 124.9(10) | H10B_38            | 109.5    |
| C2_38-C3_38-AI10   | 72.5(4)   |                    |          |



|                            |           |                    |           |
|----------------------------|-----------|--------------------|-----------|
| H10A_38-C10_38-<br>H10B_38 | 109.5     | C5_40-C4_40-Al12   | 71.3(12)  |
| C1_38-C10_38-<br>H10C_38   | 109.5     | C7_40-C4_40-Al12   | 126.4(17) |
| H10A_38-C10_38-<br>H10C_38 | 109.5     | C1_40-C5_40-C4_40  | 106.7(8)  |
| H10B_38-C10_38-<br>H10C_38 | 109.5     | C1_40-C5_40-C6_40  | 124.8(8)  |
| C1_28-O1_28-Al13           | 151.2(15) | C4_40-C5_40-C6_40  | 128.5(9)  |
| O1_28-C1_28-C3_28          | 108.9(12) | C1_40-C5_40-Al12   | 72.4(8)   |
| O1_28-C1_28-C4_28          | 109.4(13) | C4_40-C5_40-Al12   | 70.9(13)  |
| C3_28-C1_28-C4_28          | 109.3(11) | C6_40-C5_40-Al12   | 123.2(12) |
| O1_28-C1_28-C2_28          | 109.9(13) | C5_40-C6_40-H6A_40 | 109.5     |
| C3_28-C1_28-C2_28          | 108.8(10) | C5_40-C6_40-H6B_40 | 109.5     |
| C4_28-C1_28-C2_28          | 110.5(11) | H6A_40-C6_40-      | 109.5     |
| F2_28-C2_28-F1_28          | 107.2(13) | H6B_40             | 109.5     |
| F2_28-C2_28-F3_28          | 111.7(13) | C5_40-C6_40-H6C_40 | 109.5     |
| F1_28-C2_28-F3_28          | 108.5(14) | H6A_40-C6_40-      | 109.5     |
| F2_28-C2_28-C1_28          | 110.9(12) | H6C_40             | 109.5     |
| F1_28-C2_28-C1_28          | 109.3(11) | H6B_40-C6_40-      | 109.5     |
| F3_28-C2_28-C1_28          | 109.1(12) | H6C_40             | 109.5     |
| F4_28-C3_28-F6_28          | 107.5(13) | C4_40-C7_40-H7A_40 | 109.5     |
| F4_28-C3_28-F5_28          | 111.3(14) | C4_40-C7_40-H7B_40 | 109.5     |
| F6_28-C3_28-F5_28          | 106.6(13) | H7A_40-C7_40-      | 109.5     |
| F4_28-C3_28-C1_28          | 110.9(12) | H7B_40             | 109.5     |
| F6_28-C3_28-C1_28          | 110.9(12) | C4_40-C7_40-H7C_40 | 109.5     |
| F5_28-C3_28-C1_28          | 109.6(12) | H7A_40-C7_40-      | 109.5     |
| F8_28-C4_28-F9_28          | 104.7(14) | H7C_40             | 109.5     |
| F8_28-C4_28-F7_28          | 107.0(15) | H7B_40-C7_40-      | 109.5     |
| F9_28-C4_28-F7_28          | 109.6(15) | H7C_40             | 109.5     |
| F8_28-C4_28-C1_28          | 113.0(13) | C3_40-C8_40-H8A_40 | 109.5     |
| F9_28-C4_28-C1_28          | 112.3(14) | C3_40-C8_40-H8B_40 | 109.5     |
| F7_28-C4_28-C1_28          | 110.0(14) | H8A_40-C8_40-      | 109.5     |
| C2_40-C1_40-C5_40          | 109.6(8)  | H8B_40             | 109.5     |
| C2_40-C1_40-C10_40         | 125.2(8)  | C3_40-C8_40-H8C_40 | 109.5     |
| C5_40-C1_40-C10_40         | 125.2(8)  | H8A_40-C8_40-      | 109.5     |
| C2_40-C1_40-Al12           | 73.1(5)   | H8C_40             | 109.5     |
| C5_40-C1_40-Al12           | 70.2(9)   | H8B_40-C8_40-      | 109.5     |
| C10_40-C1_40-Al12          | 121.5(8)  | H8C_40             | 109.5     |
| C1_40-C2_40-C3_40          | 107.0(8)  | C2_40-C9_40-H9A_40 | 109.5     |
| C1_40-C2_40-C9_40          | 128.5(8)  | C2_40-C9_40-H9B_40 | 109.5     |
| C3_40-C2_40-C9_40          | 124.4(8)  | H9A_40-C9_40-      | 109.5     |
| C1_40-C2_40-Al12           | 70.2(5)   | H9C_40             | 109.5     |
| C3_40-C2_40-Al12           | 71.3(5)   | H9B_40-C9_40-      | 109.5     |
| C9_40-C2_40-Al12           | 125.5(8)  | H9C_40             | 109.5     |
| C4_40-C3_40-C2_40          | 108.1(8)  | C1_40-C10_40-      | 109.5     |
| C4_40-C3_40-C8_40          | 124.2(9)  | H10A_40            | 109.5     |
| C2_40-C3_40-C8_40          | 127.5(9)  | C1_40-C10_40-      | 109.5     |
| C4_40-C3_40-Al12           | 69.0(11)  | H10B_40            | 109.5     |
| C2_40-C3_40-Al12           | 72.0(5)   | H10A_40-C10_40-    | 109.5     |
| C8_40-C3_40-Al12           | 129.0(10) | H10B_40            | 109.5     |
| C3_40-C4_40-C5_40          | 108.6(9)  | C1_40-C10_40-      | 109.5     |
| C3_40-C4_40-C7_40          | 126.5(9)  | H10C_40            | 109.5     |
| C5_40-C4_40-C7_40          | 124.4(9)  | H10A_40-C10_40-    | 109.5     |
| C3_40-C4_40-Al12           | 73.9(10)  | H10C_40            | 109.5     |

|                            |           |                            |       |
|----------------------------|-----------|----------------------------|-------|
| H10B_40-C10_40-<br>H10C_40 | 109.5     | H8A_42-C8_42-<br>H8C_42    | 109.5 |
| C2_42-C1_42-C5_42          | 109.0(11) | H8B_42-C8_42-<br>H8C_42    | 109.5 |
| C2_42-C1_42-C10_42         | 124.3(16) | C2_42-C9_42-H9A_42         | 109.5 |
| C5_42-C1_42-C10_42         | 126.6(16) | C2_42-C9_42-H9B_42         | 109.5 |
| C2_42-C1_42-AI8            | 77.2(8)   | H9A_42-C9_42-<br>H9B_42    | 109.5 |
| C5_42-C1_42-AI8            | 68.6(11)  | C2_42-C9_42-H9C_42         | 109.5 |
| C10_42-C1_42-AI8           | 122.4(15) | H9A_42-C9_42-<br>H9C_42    | 109.5 |
| C3_42-C2_42-C1_42          | 107.5(11) | H9B_42-C9_42-<br>H9C_42    | 109.5 |
| C3_42-C2_42-C9_42          | 125.8(13) | C1_42-C10_42-<br>H10A_42   | 109.5 |
| C1_42-C2_42-C9_42          | 126.7(13) | C1_42-C10_42-<br>H10B_42   | 109.5 |
| C3_42-C2_42-AI8            | 72.0(7)   | H10A_42-C10_42-<br>H10B_42 | 109.5 |
| C1_42-C2_42-AI8            | 66.1(8)   | C1_42-C10_42-<br>H10C_42   | 109.5 |
| C9_42-C2_42-AI8            | 128.1(12) | H10A_42-C10_42-<br>H10C_42 | 109.5 |
| C2_42-C3_42-C4_42          | 107.8(10) | H10B_42-C10_42-<br>H10C_42 | 109.5 |
| C2_42-C3_42-C8_42          | 123.9(13) | C1_42-C10_42-<br>H10C_42   | 109.5 |
| C4_42-C3_42-C8_42          | 128.2(13) | H10B_42-C10_42-<br>H10C_42 | 109.5 |
| C2_42-C3_42-AI8            | 72.3(7)   |                            |       |
| C4_42-C3_42-AI8            | 65.7(9)   |                            |       |
| C8_42-C3_42-AI8            | 131.0(10) |                            |       |
| C5_42-C4_42-C3_42          | 109.2(10) |                            |       |
| C5_42-C4_42-C7_42          | 124.2(14) |                            |       |
| C3_42-C4_42-C7_42          | 126.6(14) |                            |       |
| C5_42-C4_42-AI8            | 69.1(11)  |                            |       |
| C3_42-C4_42-AI8            | 77.5(9)   |                            |       |
| C7_42-C4_42-AI8            | 121.3(13) |                            |       |
| C4_42-C5_42-C1_42          | 106.4(10) |                            |       |
| C4_42-C5_42-C6_42          | 129.0(15) |                            |       |
| C1_42-C5_42-C6_42          | 124.5(14) |                            |       |
| C4_42-C5_42-AI8            | 72.1(11)  |                            |       |
| C1_42-C5_42-AI8            | 72.6(12)  |                            |       |
| C6_42-C5_42-AI8            | 118.0(15) |                            |       |
| C5_42-C6_42-H6A_42         | 109.5     |                            |       |
| C5_42-C6_42-H6B_42         | 109.5     |                            |       |
| H6A_42-C6_42-<br>H6B_42    | 109.5     |                            |       |
| C5_42-C6_42-H6C_42         | 109.5     |                            |       |
| H6A_42-C6_42-<br>H6C_42    | 109.5     |                            |       |
| H6B_42-C6_42-<br>H6C_42    | 109.5     |                            |       |
| C4_42-C7_42-H7A_42         | 109.5     |                            |       |
| C4_42-C7_42-H7B_42         | 109.5     |                            |       |
| H7A_42-C7_42-<br>H7B_42    | 109.5     |                            |       |
| C4_42-C7_42-H7C_42         | 109.5     |                            |       |
| H7A_42-C7_42-<br>H7C_42    | 109.5     |                            |       |
| H7B_42-C7_42-<br>H7C_42    | 109.5     |                            |       |
| C3_42-C8_42-H8A_42         | 109.5     |                            |       |
| C3_42-C8_42-H8B_42         | 109.5     |                            |       |
| H8A_42-C8_42-<br>H8B_42    | 109.5     |                            |       |
| C3_42-C8_42-H8C_42         | 109.5     |                            |       |

S-Table 9: Bond lengths and angles for 2

| Atom-Atom  | Length [Å] |           |           |
|------------|------------|-----------|-----------|
| Al16-O1_44 | 1.621(6)   | Al2-C1_52 | 2.232(3)  |
| Al16-O1_67 | 1.64(2)    | Al2-C2_52 | 2.249(4)  |
| Al16-O1_12 | 1.716(10)  | Al2-C4_52 | 2.254(4)  |
| Al16-O1_10 | 1.719(4)   | Al2-C3_52 | 2.265(4)  |
| Al16-O1_29 | 1.720(10)  | Al3-C1_40 | 2.187(4)  |
| Al16-O1_23 | 1.724(7)   | Al3-C5_40 | 2.210(4)  |
| Al16-O1_11 | 1.742(3)   | Al3-C2_40 | 2.217(3)  |
| Al16-O1_9  | 1.764(4)   | Al3-C4_40 | 2.241(4)  |
| Al17-O1_30 | 1.585(7)   | Al3-C3_40 | 2.255(4)  |
| Al17-O1_15 | 1.685(3)   | Al1-C4_53 | 2.167(6)  |
| Al17-O1_13 | 1.702(6)   | Al1-C3_53 | 2.193(5)  |
| Al17-O1_20 | 1.717(3)   | Al1-C5_53 | 2.200(10) |
| Al17-O1_31 | 1.727(12)  | Al1-C2_53 | 2.223(5)  |
| Al17-O1_64 | 1.736(19)  | Al1-C3_49 | 2.229(12) |
| Al17-O1_24 | 1.770(6)   | Al1-C4_49 | 2.24(2)   |
| Al17-O1_25 | 1.783(6)   | Al1-C1_53 | 2.237(5)  |
| Al17-O1_14 | 1.805(7)   | Al1-C2_49 | 2.318(12) |
| Al18-O1_38 | 1.596(15)  | Al1-C5_49 | 2.398(15) |
| Al18-O1_22 | 1.610(7)   | Al1-C1_49 | 2.432(11) |
| Al18-O1_32 | 1.635(15)  | O1_1-C1_1 | 1.336(5)  |
| Al18-O1_63 | 1.66(2)    | C1_1-C2_1 | 1.535(7)  |
| Al18-O1_51 | 1.680(14)  | C1_1-C4_1 | 1.543(7)  |
| Al18-O1_16 | 1.718(11)  | C1_1-C3_1 | 1.559(8)  |
| Al18-O1_33 | 1.718(17)  | C2_1-F3_1 | 1.299(7)  |
| Al18-O1_65 | 1.73(2)    | C2_1-F2_1 | 1.331(7)  |
| Al18-O1_28 | 1.733(19)  | C2_1-F1_1 | 1.336(8)  |
| Al18-O1_17 | 1.749(7)   | C3_1-F4_1 | 1.311(7)  |
| Al18-O1_27 | 1.781(8)   | C3_1-F5_1 | 1.333(7)  |
| Al18-O1_21 | 1.803(10)  | C3_1-F6_1 | 1.350(6)  |
| Al19-O1_8  | 1.626(7)   | C4_1-F7_1 | 1.308(9)  |
| Al19-O1_26 | 1.649(10)  | C4_1-F8_1 | 1.343(7)  |
| Al19-O1_42 | 1.665(19)  | C4_1-F9_1 | 1.352(8)  |
| Al19-O1_5  | 1.693(4)   | O1_2-C1_2 | 1.351(7)  |
| Al19-O1_6  | 1.700(4)   | C1_2-C3_2 | 1.543(9)  |
| Al19-O1_7  | 1.751(9)   | C1_2-C2_2 | 1.551(9)  |
| Al19-O1_46 | 1.757(7)   | C1_2-C4_2 | 1.552(8)  |
| Al19-O1_43 | 1.797(6)   | C2_2-F3_2 | 1.325(9)  |
| Al20-O1_50 | 1.667(11)  | C2_2-F1_2 | 1.339(9)  |
| Al20-O1_37 | 1.678(11)  | C2_2-F2_2 | 1.344(8)  |
| Al20-O1_4  | 1.691(7)   | C3_2-F4_2 | 1.319(9)  |
| Al20-O1_36 | 1.697(10)  | C3_2-F5_2 | 1.338(8)  |
| Al20-O1_35 | 1.70(2)    | C3_2-F6_2 | 1.353(7)  |
| Al20-O1_1  | 1.709(4)   | C4_2-F9_2 | 1.328(7)  |
| Al20-O1_2  | 1.711(7)   | C4_2-F7_2 | 1.338(9)  |
| Al20-O1_62 | 1.72(2)    | C4_2-F8_2 | 1.348(9)  |
| Al20-O1_34 | 1.761(9)   | O1_3-C1_3 | 1.357(9)  |
| Al20-O1_3  | 1.781(8)   | C1_3-C4_3 | 1.548(9)  |
| Al20-O1_61 | 1.809(10)  | C1_3-C2_3 | 1.559(10) |
| In1-Al3    | 2.7417(11) | C1_3-C3_3 | 1.561(9)  |
| In1-Al2    | 2.7492(12) | C2_3-F3_3 | 1.310(9)  |
| In1-Al1    | 2.7672(14) | C2_3-F1_3 | 1.332(9)  |
| Al2-C5_52  | 2.228(3)   | C2_3-F2_3 | 1.340(10) |
|            |            | C3_3-F6_3 | 1.304(9)  |
|            |            | C3_3-F4_3 | 1.323(9)  |
|            |            | C3_3-F5_3 | 1.340(9)  |

|           |           |             |           |
|-----------|-----------|-------------|-----------|
| C4_3-F9_3 | 1.318(10) | O1_8-C1_8   | 1.371(10) |
| C4_3-F8_3 | 1.330(9)  | C1_8-C3_8   | 1.526(10) |
| C4_3-F7_3 | 1.346(10) | C1_8-C2_8   | 1.537(10) |
| O1_4-C1_4 | 1.353(8)  | C1_8-C4_8   | 1.553(10) |
| C1_4-C3_4 | 1.550(9)  | C2_8-F2_8   | 1.315(10) |
| C1_4-C4_4 | 1.559(9)  | C2_8-F3_8   | 1.322(11) |
| C1_4-C2_4 | 1.583(9)  | C2_8-F1_8   | 1.348(11) |
| C2_4-F1_4 | 1.320(9)  | C3_8-F6_8   | 1.321(9)  |
| C2_4-F3_4 | 1.328(10) | C3_8-F4_8   | 1.343(9)  |
| C2_4-F2_4 | 1.329(10) | C3_8-F5_8   | 1.435(11) |
| C3_4-F4_4 | 1.308(9)  | C4_8-F9_8   | 1.305(11) |
| C3_4-F5_4 | 1.333(10) | C4_8-F8_8   | 1.332(10) |
| C3_4-F6_4 | 1.336(10) | C4_8-F7_8   | 1.347(11) |
| C4_4-F7_4 | 1.284(10) | O1_9-C1_9   | 1.365(8)  |
| C4_4-F9_4 | 1.302(9)  | C1_9-C4_9   | 1.548(9)  |
| C4_4-F8_4 | 1.330(8)  | C1_9-C2_9   | 1.553(9)  |
| O1_5-C1_5 | 1.348(5)  | C1_9-C3_9   | 1.561(9)  |
| C1_5-C2_5 | 1.540(8)  | C2_9-F3_9   | 1.318(9)  |
| C1_5-C3_5 | 1.544(6)  | C2_9-F1_9   | 1.331(10) |
| C1_5-C4_5 | 1.561(7)  | C2_9-F2_9   | 1.335(8)  |
| C2_5-F1_5 | 1.299(7)  | C3_9-F6_9   | 1.320(9)  |
| C2_5-F3_5 | 1.317(7)  | C3_9-F4_9   | 1.331(10) |
| C2_5-F2_5 | 1.330(8)  | C3_9-F5_9   | 1.342(10) |
| C3_5-F6_5 | 1.310(6)  | C4_9-F9_9   | 1.326(11) |
| C3_5-F4_5 | 1.318(7)  | C4_9-F7_9   | 1.327(10) |
| C3_5-F5_5 | 1.336(7)  | C4_9-F8_9   | 1.368(10) |
| C4_5-F9_5 | 1.314(7)  | O1_10-C1_10 | 1.353(4)  |
| C4_5-F8_5 | 1.316(6)  | C1_10-C4_10 | 1.539(6)  |
| C4_5-F7_5 | 1.317(7)  | C1_10-C3_10 | 1.552(5)  |
| O1_6-C1_6 | 1.354(7)  | C1_10-C2_10 | 1.564(6)  |
| C1_6-C4_6 | 1.537(9)  | C2_10-F2_10 | 1.328(5)  |
| C1_6-C3_6 | 1.542(8)  | C2_10-F3_10 | 1.332(6)  |
| C1_6-C2_6 | 1.555(9)  | C2_10-F1_10 | 1.339(5)  |
| C2_6-F1_6 | 1.326(10) | C3_10-F5_10 | 1.328(6)  |
| C2_6-F2_6 | 1.330(9)  | C3_10-F6_10 | 1.335(5)  |
| C2_6-F3_6 | 1.334(10) | C3_10-F4_10 | 1.343(6)  |
| C3_6-F5_6 | 1.323(8)  | C4_10-F9_10 | 1.306(5)  |
| C3_6-F4_6 | 1.326(8)  | C4_10-F8_10 | 1.345(5)  |
| C3_6-F6_6 | 1.342(8)  | C4_10-F7_10 | 1.350(6)  |
| C4_6-F9_6 | 1.331(9)  | O1_11-C1_11 | 1.356(5)  |
| C4_6-F8_6 | 1.336(8)  | C1_11-C3_11 | 1.531(6)  |
| C4_6-F7_6 | 1.341(9)  | C1_11-C2_11 | 1.547(7)  |
| O1_7-C1_7 | 1.348(9)  | C1_11-C4_11 | 1.560(7)  |
| C1_7-C3_7 | 1.548(9)  | C2_11-F3_11 | 1.317(7)  |
| C1_7-C2_7 | 1.551(9)  | C2_11-F2_11 | 1.335(7)  |
| C1_7-C4_7 | 1.564(9)  | C2_11-F1_11 | 1.352(8)  |
| C2_7-F1_7 | 1.313(11) | C3_11-F4_11 | 1.315(7)  |
| C2_7-F3_7 | 1.328(9)  | C3_11-F6_11 | 1.343(7)  |
| C2_7-F2_7 | 1.342(8)  | C3_11-F5_11 | 1.351(8)  |
| C3_7-F5_7 | 1.330(9)  | C4_11-F9_11 | 1.284(7)  |
| C3_7-F4_7 | 1.330(11) | C4_11-F7_11 | 1.333(7)  |
| C3_7-F6_7 | 1.341(10) | C4_11-F8_11 | 1.347(7)  |
| C4_7-F8_7 | 1.298(8)  | O1_12-C1_12 | 1.354(9)  |
| C4_7-F9_7 | 1.324(10) | C1_12-C3_12 | 1.540(9)  |
| C4_7-F7_7 | 1.327(8)  | C1_12-C4_12 | 1.546(9)  |

|             |           |             |           |
|-------------|-----------|-------------|-----------|
| C1_12-C2_12 | 1.546(9)  | C2_16-F1_16 | 1.348(9)  |
| C2_12-F3_12 | 1.315(9)  | C3_16-F4_16 | 1.320(9)  |
| C2_12-F1_12 | 1.332(9)  | C3_16-F6_16 | 1.337(9)  |
| C2_12-F2_12 | 1.348(9)  | C3_16-F5_16 | 1.372(9)  |
| C3_12-F4_12 | 1.329(8)  | C4_16-F9_16 | 1.319(9)  |
| C3_12-F6_12 | 1.329(9)  | C4_16-F8_16 | 1.321(8)  |
| C3_12-F5_12 | 1.341(8)  | C4_16-F7_16 | 1.363(9)  |
| C4_12-F7_12 | 1.321(9)  | O1_17-C1_17 | 1.317(7)  |
| C4_12-F9_12 | 1.340(8)  | C1_17-C2_17 | 1.540(8)  |
| C4_12-F8_12 | 1.344(10) | C1_17-C4_17 | 1.566(8)  |
| O1_13-C1_13 | 1.344(7)  | C1_17-C3_17 | 1.572(9)  |
| C1_13-C4_13 | 1.541(7)  | C2_17-F3_17 | 1.319(8)  |
| C1_13-C2_13 | 1.547(7)  | C2_17-F1_17 | 1.334(8)  |
| C1_13-C3_13 | 1.565(7)  | C2_17-F2_17 | 1.339(7)  |
| C2_13-F3_13 | 1.319(7)  | C3_17-F5_17 | 1.295(9)  |
| C2_13-F1_13 | 1.330(7)  | C3_17-F6_17 | 1.329(8)  |
| C2_13-F2_13 | 1.351(7)  | C3_17-F4_17 | 1.380(9)  |
| C3_13-F5_13 | 1.321(7)  | C4_17-F8_17 | 1.289(8)  |
| C3_13-F6_13 | 1.334(6)  | C4_17-F7_17 | 1.334(8)  |
| C3_13-F4_13 | 1.337(7)  | C4_17-F9_17 | 1.378(8)  |
| C4_13-F9_13 | 1.328(6)  | C1_18-F1_18 | 1.346(6)  |
| C4_13-F7_13 | 1.336(7)  | C1_18-C6_18 | 1.363(7)  |
| C4_13-F8_13 | 1.358(6)  | C1_18-C2_18 | 1.375(6)  |
| O1_14-C1_14 | 1.368(8)  | C2_18-F2_18 | 1.345(6)  |
| C1_14-C4_14 | 1.531(9)  | C2_18-C3_18 | 1.367(7)  |
| C1_14-C2_14 | 1.544(9)  | C3_18-C4_18 | 1.382(7)  |
| C1_14-C3_14 | 1.549(9)  | C3_18-H3_18 | 0.9500    |
| C2_14-F3_14 | 1.289(9)  | C4_18-C5_18 | 1.372(7)  |
| C2_14-F2_14 | 1.299(8)  | C4_18-H4_18 | 0.9500    |
| C2_14-F1_14 | 1.388(10) | C5_18-C6_18 | 1.373(7)  |
| C3_14-F4_14 | 1.297(10) | C5_18-H5_18 | 0.9500    |
| C3_14-F6_14 | 1.321(9)  | C6_18-H6_18 | 0.9500    |
| C3_14-F5_14 | 1.370(10) | O1_20-C1_20 | 1.345(7)  |
| C4_14-F9_14 | 1.234(10) | C1_20-C4_20 | 1.519(9)  |
| C4_14-F8_14 | 1.333(11) | C1_20-C3_20 | 1.548(9)  |
| C4_14-F7_14 | 1.383(10) | C1_20-C2_20 | 1.578(9)  |
| O1_15-C1_15 | 1.346(7)  | C2_20-F3_20 | 1.287(9)  |
| C1_15-C4_15 | 1.547(8)  | C2_20-F2_20 | 1.342(8)  |
| C1_15-C3_15 | 1.558(7)  | C2_20-F1_20 | 1.387(9)  |
| C1_15-C2_15 | 1.561(7)  | C3_20-F4_20 | 1.321(8)  |
| C2_15-F2_15 | 1.326(7)  | C3_20-F6_20 | 1.353(8)  |
| C2_15-F3_15 | 1.327(7)  | C3_20-F5_20 | 1.379(9)  |
| C2_15-F1_15 | 1.327(6)  | C4_20-F9_20 | 1.277(8)  |
| C3_15-F4_15 | 1.314(7)  | C4_20-F8_20 | 1.330(7)  |
| C3_15-F5_15 | 1.332(7)  | C4_20-F7_20 | 1.388(10) |
| C3_15-F6_15 | 1.334(7)  | O1_23-C1_23 | 1.358(10) |
| C4_15-F9_15 | 1.323(7)  | C1_23-C3_23 | 1.543(11) |
| C4_15-F8_15 | 1.332(7)  | C1_23-C2_23 | 1.545(11) |
| C4_15-F7_15 | 1.333(8)  | C1_23-C4_23 | 1.551(11) |
| O1_16-C1_16 | 1.347(9)  | C2_23-F1_23 | 1.312(11) |
| C1_16-C3_16 | 1.537(9)  | C2_23-F3_23 | 1.313(11) |
| C1_16-C4_16 | 1.558(9)  | C2_23-F2_23 | 1.328(11) |
| C1_16-C2_16 | 1.562(9)  | C3_23-F5_23 | 1.330(12) |
| C2_16-F3_16 | 1.315(8)  | C3_23-F6_23 | 1.336(12) |
| C2_16-F2_16 | 1.340(8)  | C3_23-F4_23 | 1.336(11) |

|             |           |             |           |
|-------------|-----------|-------------|-----------|
| C4_23-F9_23 | 1.313(11) | O1_30-C1_30 | 1.353(10) |
| C4_23-F8_23 | 1.319(11) | C1_30-C2_30 | 1.535(11) |
| C4_23-F7_23 | 1.324(11) | C1_30-C4_30 | 1.545(11) |
| O1_24-C1_24 | 1.362(10) | C1_30-C3_30 | 1.550(11) |
| C1_24-C4_24 | 1.546(11) | C2_30-F3_30 | 1.270(12) |
| C1_24-C2_24 | 1.552(10) | C2_30-F1_30 | 1.276(11) |
| C1_24-C3_24 | 1.559(11) | C2_30-F2_30 | 1.355(11) |
| C2_24-F3_24 | 1.320(10) | C3_30-F6_30 | 1.308(10) |
| C2_24-F2_24 | 1.330(9)  | C3_30-F5_30 | 1.315(11) |
| C2_24-F1_24 | 1.332(11) | C3_30-F4_30 | 1.327(11) |
| C3_24-F5_24 | 1.332(11) | C4_30-F9_30 | 1.301(12) |
| C3_24-F4_24 | 1.334(10) | C4_30-F7_30 | 1.333(11) |
| C3_24-F6_24 | 1.341(9)  | C4_30-F8_30 | 1.341(11) |
| C4_24-F7_24 | 1.316(10) | O1_31-C1_31 | 1.349(11) |
| C4_24-F9_24 | 1.319(10) | C1_31-C3_31 | 1.539(10) |
| C4_24-F8_24 | 1.351(9)  | C1_31-C2_31 | 1.547(11) |
| O1_25-C1_25 | 1.356(10) | C1_31-C4_31 | 1.549(11) |
| C1_25-C3_25 | 1.538(10) | C2_31-F3_31 | 1.310(11) |
| C1_25-C4_25 | 1.551(11) | C2_31-F2_31 | 1.325(11) |
| C1_25-C2_25 | 1.554(11) | C2_31-F1_31 | 1.337(12) |
| C2_25-F3_25 | 1.313(11) | C3_31-F4_31 | 1.294(11) |
| C2_25-F1_25 | 1.323(10) | C3_31-F6_31 | 1.321(11) |
| C2_25-F2_25 | 1.342(10) | C3_31-F5_31 | 1.343(11) |
| C3_25-F6_25 | 1.258(10) | C4_31-F9_31 | 1.318(11) |
| C3_25-F5_25 | 1.278(12) | C4_31-F7_31 | 1.324(12) |
| C3_25-F4_25 | 1.325(10) | C4_31-F8_31 | 1.326(11) |
| C4_25-F8_25 | 1.286(10) | O1_33-C1_33 | 1.344(12) |
| C4_25-F9_25 | 1.292(11) | C1_33-C2_33 | 1.545(11) |
| C4_25-F7_25 | 1.385(11) | C1_33-C3_33 | 1.551(11) |
| O1_26-C1_26 | 1.345(10) | C1_33-C4_33 | 1.555(11) |
| C1_26-C2_26 | 1.538(10) | C2_33-F2_33 | 1.287(11) |
| C1_26-C3_26 | 1.561(10) | C2_33-F3_33 | 1.340(11) |
| C1_26-C4_26 | 1.563(10) | C2_33-F1_33 | 1.395(12) |
| C2_26-F3_26 | 1.336(11) | C3_33-F4_33 | 1.325(11) |
| C2_26-F2_26 | 1.336(10) | C3_33-F6_33 | 1.327(11) |
| C2_26-F1_26 | 1.345(11) | C3_33-F5_33 | 1.358(12) |
| C3_26-F4_26 | 1.308(10) | C4_33-F7_33 | 1.340(12) |
| C3_26-F5_26 | 1.328(9)  | C4_33-F8_33 | 1.343(11) |
| C3_26-F6_26 | 1.340(11) | C4_33-F9_33 | 1.347(12) |
| C4_26-F8_26 | 1.308(9)  | O1_34-C1_34 | 1.303(11) |
| C4_26-F7_26 | 1.330(11) | C1_34-C4_34 | 1.531(11) |
| C4_26-F9_26 | 1.349(11) | C1_34-C3_34 | 1.560(11) |
| O1_29-C1_29 | 1.375(10) | C1_34-C2_34 | 1.564(11) |
| C1_29-C3_29 | 1.547(10) | C2_34-F3_34 | 1.308(11) |
| C1_29-C4_29 | 1.553(10) | C2_34-F2_34 | 1.312(12) |
| C1_29-C2_29 | 1.564(10) | C2_34-F1_34 | 1.360(11) |
| C2_29-F1_29 | 1.303(11) | C3_34-F6_34 | 1.295(11) |
| C2_29-F3_29 | 1.327(11) | C3_34-F5_34 | 1.328(11) |
| C2_29-F2_29 | 1.328(11) | C3_34-F4_34 | 1.337(12) |
| C3_29-F4_29 | 1.317(9)  | C4_34-F9_34 | 1.318(12) |
| C3_29-F5_29 | 1.339(9)  | C4_34-F8_34 | 1.327(11) |
| C3_29-F6_29 | 1.342(11) | C4_34-F7_34 | 1.339(11) |
| C4_29-F7_29 | 1.299(10) | O1_35-C1_35 | 1.361(13) |
| C4_29-F8_29 | 1.328(10) | C1_35-C3_35 | 1.542(12) |
| C4_29-F9_29 | 1.354(9)  | C1_35-C4_35 | 1.546(12) |

|             |           |             |           |
|-------------|-----------|-------------|-----------|
| C1_35-C2_35 | 1.551(12) | C2_41-F1_41 | 1.334(12) |
| C2_35-F3_35 | 1.320(12) | C3_41-F5_41 | 1.328(12) |
| C2_35-F1_35 | 1.325(13) | C3_41-F4_41 | 1.340(12) |
| C2_35-F2_35 | 1.329(13) | C3_41-F6_41 | 1.341(12) |
| C3_35-F5_35 | 1.323(13) | C4_41-F7_41 | 1.282(13) |
| C3_35-F4_35 | 1.323(13) | C4_41-F8_41 | 1.307(12) |
| C3_35-F6_35 | 1.335(12) | C4_41-F9_41 | 1.322(12) |
| C4_35-F9_35 | 1.323(13) | O1_42-C1_42 | 1.337(13) |
| C4_35-F8_35 | 1.337(12) | C1_42-C4_42 | 1.540(12) |
| C4_35-F7_35 | 1.344(13) | C1_42-C3_42 | 1.544(12) |
| O1_27-C1_27 | 1.325(9)  | C1_42-C2_42 | 1.560(12) |
| C1_27-C2_27 | 1.531(10) | C2_42-F1_42 | 1.311(13) |
| C1_27-C4_27 | 1.546(10) | C2_42-F2_42 | 1.320(13) |
| C1_27-C3_27 | 1.559(10) | C2_42-F3_42 | 1.321(13) |
| C2_27-F3_27 | 1.313(11) | C3_42-F4_42 | 1.327(13) |
| C2_27-F2_27 | 1.314(10) | C3_42-F6_42 | 1.340(13) |
| C2_27-F1_27 | 1.323(10) | C3_42-F5_42 | 1.354(13) |
| C3_27-F6_27 | 1.280(10) | C4_42-F9_42 | 1.333(13) |
| C3_27-F4_27 | 1.312(11) | C4_42-F8_42 | 1.335(13) |
| C3_27-F5_27 | 1.336(11) | C4_42-F7_42 | 1.340(13) |
| C4_27-F9_27 | 1.298(11) | O1_43-C1_43 | 1.347(9)  |
| C4_27-F8_27 | 1.326(10) | C1_43-C4_43 | 1.534(10) |
| C4_27-F7_27 | 1.344(11) | C1_43-C2_43 | 1.545(10) |
| O1_36-C1_36 | 1.351(10) | C1_43-C3_43 | 1.583(10) |
| C1_36-C3_36 | 1.546(11) | C2_43-F3_43 | 1.325(10) |
| C1_36-C2_36 | 1.547(10) | C2_43-F2_43 | 1.331(9)  |
| C1_36-C4_36 | 1.548(10) | C2_43-F1_43 | 1.339(10) |
| C2_36-F2_36 | 1.318(11) | C3_43-F6_43 | 1.324(9)  |
| C2_36-F3_36 | 1.329(10) | C3_43-F4_43 | 1.334(10) |
| C2_36-F1_36 | 1.338(10) | C3_43-F5_43 | 1.359(10) |
| C3_36-F5_36 | 1.305(11) | C4_43-F9_43 | 1.334(10) |
| C3_36-F4_36 | 1.326(11) | C4_43-F8_43 | 1.358(9)  |
| C3_36-F6_36 | 1.339(11) | C4_43-F7_43 | 1.356(10) |
| C4_36-F7_36 | 1.312(10) | O1_44-C1_44 | 1.349(9)  |
| C4_36-F8_36 | 1.330(11) | C1_44-C2_44 | 1.534(10) |
| C4_36-F9_36 | 1.332(11) | C1_44-C3_44 | 1.534(10) |
| O1_37-C1_37 | 1.348(12) | C1_44-C4_44 | 1.558(10) |
| C1_37-C2_37 | 1.549(12) | C2_44-F2_44 | 1.312(10) |
| C1_37-C4_37 | 1.550(12) | C2_44-F3_44 | 1.317(10) |
| C1_37-C3_37 | 1.550(12) | C2_44-F1_44 | 1.320(9)  |
| C2_37-F1_37 | 1.324(12) | C3_44-F4_44 | 1.310(10) |
| C2_37-F3_37 | 1.327(12) | C3_44-F6_44 | 1.330(9)  |
| C2_37-F2_37 | 1.346(12) | C3_44-F5_44 | 1.341(11) |
| C3_37-F5_37 | 1.319(13) | C4_44-F8_44 | 1.315(11) |
| C3_37-F4_37 | 1.329(12) | C4_44-F9_44 | 1.328(11) |
| C3_37-F6_37 | 1.348(13) | C4_44-F7_44 | 1.343(11) |
| C4_37-F8_37 | 1.338(12) | O1_46-C1_46 | 1.363(10) |
| C4_37-F9_37 | 1.342(12) | C1_46-C2_46 | 1.541(11) |
| C4_37-F7_37 | 1.345(12) | C1_46-C4_46 | 1.551(11) |
| O1_41-C1_41 | 1.354(12) | C1_46-C3_46 | 1.557(11) |
| C1_41-C2_41 | 1.536(12) | C2_46-F2_46 | 1.337(11) |
| C1_41-C3_41 | 1.540(12) | C2_46-F1_46 | 1.338(12) |
| C1_41-C4_41 | 1.551(12) | C2_46-F3_46 | 1.338(11) |
| C2_41-F2_41 | 1.322(12) | C3_46-F5_46 | 1.323(10) |
| C2_41-F3_41 | 1.326(12) | C3_46-F4_46 | 1.328(10) |

|             |           |             |           |
|-------------|-----------|-------------|-----------|
| C3_46-F6_46 | 1.342(11) | C4_64-F9_64 | 1.350(12) |
| C4_46-F7_46 | 1.324(12) | O1_65-C1_65 | 1.345(13) |
| C4_46-F8_46 | 1.336(11) | C1_65-C3_65 | 1.546(12) |
| C4_46-F9_46 | 1.343(11) | C1_65-C2_65 | 1.550(12) |
| O1_61-C1_61 | 1.356(12) | C1_65-C4_65 | 1.565(12) |
| C1_61-C4_61 | 1.546(12) | C2_65-F2_65 | 1.329(13) |
| C1_61-C3_61 | 1.552(12) | C2_65-F3_65 | 1.331(13) |
| C1_61-C2_61 | 1.554(12) | C2_65-F1_65 | 1.340(13) |
| C2_61-F3_61 | 1.324(13) | C3_65-F5_65 | 1.326(13) |
| C2_61-F2_61 | 1.332(12) | C3_65-F6_65 | 1.331(13) |
| C2_61-F1_61 | 1.333(12) | C3_65-F4_65 | 1.336(12) |
| C3_61-F6_61 | 1.325(12) | C4_65-F7_65 | 1.314(12) |
| C3_61-F5_61 | 1.325(13) | C4_65-F8_65 | 1.327(12) |
| C3_61-F4_61 | 1.334(12) | C4_65-F9_65 | 1.329(13) |
| C4_61-F9_61 | 1.336(12) | C1_19-C6_19 | 1.328(9)  |
| C4_61-F8_61 | 1.337(12) | C1_19-F1_19 | 1.341(9)  |
| C4_61-F7_61 | 1.338(13) | C1_19-C2_19 | 1.396(10) |
| O1_62-C1_62 | 1.335(13) | C2_19-F2_19 | 1.330(9)  |
| C1_62-C4_62 | 1.547(12) | C2_19-C3_19 | 1.370(10) |
| C1_62-C2_62 | 1.551(12) | C3_19-C4_19 | 1.363(10) |
| C1_62-C3_62 | 1.559(12) | C3_19-H3_19 | 0.9500    |
| C2_62-F3_62 | 1.314(12) | C4_19-C5_19 | 1.367(9)  |
| C2_62-F1_62 | 1.317(13) | C4_19-H4_19 | 0.9500    |
| C2_62-F2_62 | 1.392(14) | C5_19-C6_19 | 1.365(9)  |
| C3_62-F6_62 | 1.310(12) | C5_19-H5_19 | 0.9500    |
| C3_62-F5_62 | 1.316(13) | C6_19-H6_19 | 0.9500    |
| C3_62-F4_62 | 1.332(13) | O1_67-C1_67 | 1.343(13) |
| C4_62-F7_62 | 1.307(13) | C1_67-C2_67 | 1.541(12) |
| C4_62-F8_62 | 1.330(12) | C1_67-C4_67 | 1.542(12) |
| C4_62-F9_62 | 1.344(13) | C1_67-C3_67 | 1.558(13) |
| O1_63-C1_63 | 1.326(13) | C2_67-F3_67 | 1.322(13) |
| C1_63-C4_63 | 1.541(12) | C2_67-F1_67 | 1.330(13) |
| C1_63-C3_63 | 1.549(12) | C2_67-F2_67 | 1.347(13) |
| C1_63-C2_63 | 1.567(12) | C3_67-F6_67 | 1.313(13) |
| C2_63-F2_63 | 1.301(13) | C3_67-F5_67 | 1.320(13) |
| C2_63-F3_63 | 1.323(13) | C3_67-F4_67 | 1.324(13) |
| C2_63-F1_63 | 1.344(13) | C4_67-F9_67 | 1.319(13) |
| C3_63-F4_63 | 1.301(12) | C4_67-F7_67 | 1.329(13) |
| C3_63-F5_63 | 1.343(13) | C4_67-F8_67 | 1.340(13) |
| C3_63-F6_63 | 1.364(13) | O1_38-C1_38 | 1.367(12) |
| C4_63-F8_63 | 1.302(13) | C1_38-C2_38 | 1.549(11) |
| C4_63-F9_63 | 1.345(13) | C1_38-C4_38 | 1.555(12) |
| C4_63-F7_63 | 1.345(13) | C1_38-C3_38 | 1.566(11) |
| O1_64-C1_64 | 1.335(12) | C2_38-F2_38 | 1.331(12) |
| C1_64-C2_64 | 1.538(12) | C2_38-F1_38 | 1.331(13) |
| C1_64-C3_64 | 1.541(12) | C2_38-F3_38 | 1.338(12) |
| C1_64-C4_64 | 1.584(12) | C3_38-F6_38 | 1.319(12) |
| C2_64-F3_64 | 1.320(12) | C3_38-F5_38 | 1.342(13) |
| C2_64-F2_64 | 1.344(13) | C3_38-F4_38 | 1.392(12) |
| C2_64-F1_64 | 1.352(12) | C4_38-F8_38 | 1.281(12) |
| C3_64-F4_64 | 1.325(12) | C4_38-F7_38 | 1.329(12) |
| C3_64-F5_64 | 1.338(13) | C4_38-F9_38 | 1.354(12) |
| C3_64-F6_64 | 1.394(13) | O1_21-C1_21 | 1.377(10) |
| C4_64-F8_64 | 1.256(12) | C1_21-C3_21 | 1.530(9)  |
| C4_64-F7_64 | 1.332(12) | C1_21-C4_21 | 1.549(9)  |



|                 |            |                 |          |
|-----------------|------------|-----------------|----------|
| C1_21-C2_21     | 1.561(9)   | C9A_45-H9AB_45  | 0.9800   |
| C2_21-F2_21     | 1.319(9)   | C9A_45-H9AC_45  | 0.9800   |
| C2_21-F3_21     | 1.332(10)  | C8A_45-H8AA_45  | 0.9800   |
| C2_21-F1_21     | 1.357(10)  | C8A_45-H8AB_45  | 0.9800   |
| C3_21-F5_21     | 1.327(9)   | C8A_45-H8AC_45  | 0.9800   |
| C3_21-F4_21     | 1.337(8)   | C7A_45-H7AA_45  | 0.9800   |
| C3_21-F6_21     | 1.345(8)   | C7A_45-H7AB_45  | 0.9800   |
| C4_21-F9_21     | 1.304(10)  | C7A_45-H7AC_45  | 0.9800   |
| C4_21-F7_21     | 1.322(9)   | C6A_45-H6AA_45  | 0.9800   |
| C4_21-F8_21     | 1.355(9)   | C6A_45-H6AB_45  | 0.9800   |
| O1_28-C1_28     | 1.340(12)  | C6A_45-H6AC_45  | 0.9800   |
| C1_28-C4_28     | 1.535(11)  | C1B_45-C5B_45   | 1.419(5) |
| C1_28-C2_28     | 1.558(11)  | C1B_45-C2B_45   | 1.419(5) |
| C1_28-C3_28     | 1.562(11)  | C1B_45-C6B_45   | 1.505(5) |
| C2_28-F1_28     | 1.315(12)  | C2B_45-C3B_45   | 1.417(5) |
| C2_28-F3_28     | 1.323(12)  | C2B_45-C7B_45   | 1.513(5) |
| C2_28-F2_28     | 1.333(12)  | C3B_45-C4B_45   | 1.422(4) |
| C3_28-F5_28     | 1.318(12)  | C3B_45-C8B_45   | 1.499(5) |
| C3_28-F6_28     | 1.344(12)  | C4B_45-C5B_45   | 1.420(4) |
| C3_28-F4_28     | 1.347(12)  | C4B_45-C9B_45   | 1.501(4) |
| C4_28-F7_28     | 1.332(12)  | C5B_45-C10B_45  | 1.508(5) |
| C4_28-F9_28     | 1.333(11)  | C10B_45-H10D_45 | 0.9800   |
| C4_28-F8_28     | 1.337(11)  | C10B_45-H10E_45 | 0.9800   |
| In1_45-Al3_45   | 2.7396(15) | C10B_45-H10F_45 | 0.9800   |
| In1_45-Al1_45   | 2.7575(13) | C9B_45-H9BA_45  | 0.9800   |
| In1_45-Al2_45   | 2.7635(13) | C9B_45-H9BB_45  | 0.9800   |
| Al2_45-C1B_45   | 2.221(4)   | C9B_45-H9BC_45  | 0.9800   |
| Al2_45-C5B_45   | 2.227(3)   | C8B_45-H8BA_45  | 0.9800   |
| Al2_45-C4B_45   | 2.243(3)   | C8B_45-H8BB_45  | 0.9800   |
| Al2_45-C2B_45   | 2.244(4)   | C8B_45-H8BC_45  | 0.9800   |
| Al2_45-C3B_45   | 2.255(3)   | C7B_45-H7BA_45  | 0.9800   |
| Al3_45-C1C_45   | 2.226(3)   | C7B_45-H7BB_45  | 0.9800   |
| Al3_45-C5C_45   | 2.228(3)   | C7B_45-H7BC_45  | 0.9800   |
| Al3_45-C2C_45   | 2.229(3)   | C6B_45-H6BA_45  | 0.9800   |
| Al3_45-C4C_45   | 2.241(3)   | C6B_45-H6BB_45  | 0.9800   |
| Al3_45-C3C_45   | 2.251(4)   | C6B_45-H6BC_45  | 0.9800   |
| Al1_45-C3A_45   | 2.204(3)   | C1C_45-C2C_45   | 1.420(4) |
| Al1_45-C2A_45   | 2.221(3)   | C1C_45-C5C_45   | 1.431(4) |
| Al1_45-C4A_45   | 2.221(3)   | C1C_45-C6C_45   | 1.495(5) |
| Al1_45-C5A_45   | 2.240(3)   | C2C_45-C3C_45   | 1.403(5) |
| Al1_45-C1A_45   | 2.243(3)   | C2C_45-C7C_45   | 1.514(5) |
| C1A_45-C2A_45   | 1.424(4)   | C3C_45-C4C_45   | 1.409(5) |
| C1A_45-C5A_45   | 1.428(4)   | C3C_45-C8C_45   | 1.508(5) |
| C1A_45-C6A_45   | 1.504(5)   | C4C_45-C5C_45   | 1.430(5) |
| C2A_45-C3A_45   | 1.429(5)   | C4C_45-C9C_45   | 1.507(5) |
| C2A_45-C7A_45   | 1.505(4)   | C5C_45-C10C_45  | 1.496(5) |
| C3A_45-C4A_45   | 1.437(4)   | C10C_45-H10G_45 | 0.9800   |
| C3A_45-C8A_45   | 1.493(5)   | C10C_45-H10H_45 | 0.9800   |
| C4A_45-C5A_45   | 1.418(4)   | C10C_45-H10I_45 | 0.9800   |
| C4A_45-C9A_45   | 1.502(4)   | C9C_45-H9CA_45  | 0.9800   |
| C5A_45-C10A_45  | 1.504(4)   | C9C_45-H9CB_45  | 0.9800   |
| C10A_45-H10A_45 | 0.9800     | C9C_45-H9CC_45  | 0.9800   |
| C10A_45-H10B_45 | 0.9800     | C8C_45-H8CA_45  | 0.9800   |
| C10A_45-H10C_45 | 0.9800     | C8C_45-H8CB_45  | 0.9800   |
| C9A_45-H9AA_45  | 0.9800     | C8C_45-H8CC_45  | 0.9800   |

|                 |            |                 |            |
|-----------------|------------|-----------------|------------|
| C7C_45-H7CA_45  | 0.9800     | C3B_66-C8B_66   | 1.498(5)   |
| C7C_45-H7CB_45  | 0.9800     | C4B_66-C5B_66   | 1.424(5)   |
| C7C_45-H7CC_45  | 0.9800     | C4B_66-C9B_66   | 1.502(5)   |
| C6C_45-H6CA_45  | 0.9800     | C5B_66-C10B_66  | 1.503(5)   |
| C6C_45-H6CB_45  | 0.9800     | C10B_66-H10D_66 | 0.9800     |
| C6C_45-H6CC_45  | 0.9800     | C10B_66-H10E_66 | 0.9800     |
| In1_66-Al1_66   | 2.7322(19) | C10B_66-H10F_66 | 0.9800     |
| In1_66-Al3_66   | 2.7411(19) | C9B_66-H9BA_66  | 0.9800     |
| In1_66-Al2_66   | 2.7500(14) | C9B_66-H9BB_66  | 0.9800     |
| Al2_66-C5B_66   | 2.214(3)   | C9B_66-H9BC_66  | 0.9800     |
| Al2_66-C1B_66   | 2.220(3)   | C8B_66-H8BA_66  | 0.9800     |
| Al2_66-C2B_66   | 2.232(3)   | C8B_66-H8BB_66  | 0.9800     |
| Al2_66-C4B_66   | 2.238(3)   | C8B_66-H8BC_66  | 0.9800     |
| Al2_66-C3B_66   | 2.246(3)   | C7B_66-H7BA_66  | 0.9800     |
| Al3_66-C1C_66   | 2.199(3)   | C7B_66-H7BB_66  | 0.9800     |
| Al3_66-C2C_66   | 2.203(4)   | C7B_66-H7BC_66  | 0.9800     |
| Al3_66-C5C_66   | 2.224(3)   | C6B_66-H6BA_66  | 0.9800     |
| Al3_66-C3C_66   | 2.237(3)   | C6B_66-H6BB_66  | 0.9800     |
| Al3_66-C4C_66   | 2.242(3)   | C6B_66-H6BC_66  | 0.9800     |
| Al1_66-C2A_66   | 2.218(4)   | C1C_66-C5C_66   | 1.424(4)   |
| Al1_66-C1A_66   | 2.224(4)   | C1C_66-C2C_66   | 1.436(4)   |
| Al1_66-C3A_66   | 2.231(3)   | C1C_66-C6C_66   | 1.501(5)   |
| Al1_66-C5A_66   | 2.247(4)   | C2C_66-C3C_66   | 1.424(5)   |
| Al1_66-C4A_66   | 2.248(4)   | C2C_66-C7C_66   | 1.507(5)   |
| C1A_66-C5A_66   | 1.426(6)   | C3C_66-C4C_66   | 1.422(5)   |
| C1A_66-C2A_66   | 1.436(5)   | C3C_66-C8C_66   | 1.506(5)   |
| C1A_66-C6A_66   | 1.502(6)   | C4C_66-C5C_66   | 1.426(4)   |
| C2A_66-C3A_66   | 1.414(5)   | C4C_66-C9C_66   | 1.504(5)   |
| C2A_66-C7A_66   | 1.503(5)   | C5C_66-C10C_66  | 1.503(4)   |
| C3A_66-C4A_66   | 1.421(5)   | C10C_66-H10G_66 | 0.9800     |
| C3A_66-C8A_66   | 1.506(5)   | C10C_66-H10H_66 | 0.9800     |
| C4A_66-C5A_66   | 1.405(5)   | C10C_66-H10I_66 | 0.9800     |
| C4A_66-C9A_66   | 1.500(6)   | C9C_66-H9CA_66  | 0.9800     |
| C5A_66-C10A_66  | 1.511(5)   | C9C_66-H9CB_66  | 0.9800     |
| C10A_66-H10A_66 | 0.9800     | C9C_66-H9CC_66  | 0.9800     |
| C10A_66-H10B_66 | 0.9800     | C8C_66-H8CA_66  | 0.9800     |
| C10A_66-H10C_66 | 0.9800     | C8C_66-H8CB_66  | 0.9800     |
| C9A_66-H9AA_66  | 0.9800     | C8C_66-H8CC_66  | 0.9800     |
| C9A_66-H9AB_66  | 0.9800     | C7C_66-H7CA_66  | 0.9800     |
| C9A_66-H9AC_66  | 0.9800     | C7C_66-H7CB_66  | 0.9800     |
| C8A_66-H8AA_66  | 0.9800     | C7C_66-H7CC_66  | 0.9800     |
| C8A_66-H8AB_66  | 0.9800     | C6C_66-H6CA_66  | 0.9800     |
| C8A_66-H8AC_66  | 0.9800     | C6C_66-H6CB_66  | 0.9800     |
| C7A_66-H7AA_66  | 0.9800     | C6C_66-H6CC_66  | 0.9800     |
| C7A_66-H7AB_66  | 0.9800     | In1_68-Al3_68   | 2.7318(12) |
| C7A_66-H7AC_66  | 0.9800     | In1_68-Al2_68   | 2.7351(15) |
| C6A_66-H6AA_66  | 0.9800     | In1_68-Al1_68   | 2.7396(13) |
| C6A_66-H6AB_66  | 0.9800     | Al2_68-C5B_68   | 2.199(5)   |
| C6A_66-H6AC_66  | 0.9800     | Al2_68-C4B_68   | 2.207(5)   |
| C1B_66-C2B_66   | 1.415(5)   | Al2_68-C3B_68   | 2.209(5)   |
| C1B_66-C5B_66   | 1.427(5)   | Al2_68-C1B_68   | 2.210(5)   |
| C1B_66-C6B_66   | 1.506(5)   | Al2_68-C2B_68   | 2.225(5)   |
| C2B_66-C3B_66   | 1.413(5)   | Al3_68-C1C_68   | 2.207(4)   |
| C2B_66-C7B_66   | 1.507(5)   | Al3_68-C2C_68   | 2.212(4)   |
| C3B_66-C4B_66   | 1.425(5)   | Al3_68-C5C_68   | 2.232(4)   |

|                 |          |                 |            |
|-----------------|----------|-----------------|------------|
| AI3_68-C3C_68   | 2.233(4) | C6B_68-H6BB_68  | 0.9800     |
| AI3_68-C4C_68   | 2.240(3) | C6B_68-H6BC_68  | 0.9800     |
| AI1_68-C1A_68   | 2.220(4) | C1C_68-C2C_68   | 1.422(6)   |
| AI1_68-C2A_68   | 2.222(4) | C1C_68-C5C_68   | 1.439(6)   |
| AI1_68-C4A_68   | 2.233(4) | C1C_68-C6C_68   | 1.490(6)   |
| AI1_68-C5A_68   | 2.233(4) | C2C_68-C3C_68   | 1.410(5)   |
| AI1_68-C3A_68   | 2.239(4) | C2C_68-C7C_68   | 1.519(6)   |
| C1A_68-C2A_68   | 1.425(7) | C3C_68-C4C_68   | 1.416(5)   |
| C1A_68-C5A_68   | 1.430(6) | C3C_68-C8C_68   | 1.508(5)   |
| C1A_68-C6A_68   | 1.499(6) | C4C_68-C5C_68   | 1.410(5)   |
| C2A_68-C3A_68   | 1.425(6) | C4C_68-C9C_68   | 1.495(5)   |
| C2A_68-C7A_68   | 1.506(7) | C5C_68-C10C_68  | 1.501(6)   |
| C3A_68-C4A_68   | 1.421(7) | C10C_68-H10G_68 | 0.9800     |
| C3A_68-C8A_68   | 1.502(7) | C10C_68-H10H_68 | 0.9800     |
| C4A_68-C5A_68   | 1.423(7) | C10C_68-H10I_68 | 0.9800     |
| C4A_68-C9A_68   | 1.504(6) | C9C_68-H9CA_68  | 0.9800     |
| C5A_68-C10A_68  | 1.502(7) | C9C_68-H9CB_68  | 0.9800     |
| C10A_68-H10A_68 | 0.9800   | C9C_68-H9CC_68  | 0.9800     |
| C10A_68-H10B_68 | 0.9800   | C8C_68-H8CA_68  | 0.9800     |
| C10A_68-H10C_68 | 0.9800   | C8C_68-H8CB_68  | 0.9800     |
| C9A_68-H9AA_68  | 0.9800   | C8C_68-H8CC_68  | 0.9800     |
| C9A_68-H9AB_68  | 0.9800   | C7C_68-H7CA_68  | 0.9800     |
| C9A_68-H9AC_68  | 0.9800   | C7C_68-H7CB_68  | 0.9800     |
| C8A_68-H8AA_68  | 0.9800   | C7C_68-H7CC_68  | 0.9800     |
| C8A_68-H8AB_68  | 0.9800   | C6C_68-H6CA_68  | 0.9800     |
| C8A_68-H8AC_68  | 0.9800   | C6C_68-H6CB_68  | 0.9800     |
| C7A_68-H7AA_68  | 0.9800   | C6C_68-H6CC_68  | 0.9800     |
| C7A_68-H7AB_68  | 0.9800   | ln1_69-AI1_69   | 2.7317(11) |
| C7A_68-H7AC_68  | 0.9800   | ln1_69-AI2_69   | 2.7553(13) |
| C6A_68-H6AA_68  | 0.9800   | ln1_69-AI3_69   | 2.7616(13) |
| C6A_68-H6AB_68  | 0.9800   | AI2_69-C5B_69   | 2.193(4)   |
| C6A_68-H6AC_68  | 0.9800   | AI2_69-C4B_69   | 2.220(4)   |
| C1B_68-C2B_68   | 1.401(6) | AI2_69-C1B_69   | 2.220(4)   |
| C1B_68-C5B_68   | 1.411(7) | AI2_69-C2B_69   | 2.233(4)   |
| C1B_68-C6B_68   | 1.518(7) | AI2_69-C3B_69   | 2.243(4)   |
| C2B_68-C3B_68   | 1.409(7) | AI3_69-C2C_69   | 2.222(4)   |
| C2B_68-C7B_68   | 1.509(7) | AI3_69-C1C_69   | 2.224(4)   |
| C3B_68-C4B_68   | 1.438(8) | AI3_69-C5C_69   | 2.233(4)   |
| C3B_68-C8B_68   | 1.504(7) | AI3_69-C3C_69   | 2.236(4)   |
| C4B_68-C5B_68   | 1.432(7) | AI3_69-C4C_69   | 2.239(4)   |
| C4B_68-C9B_68   | 1.506(8) | AI1_69-C1A_69   | 2.223(3)   |
| C5B_68-C10B_68  | 1.505(7) | AI1_69-C2A_69   | 2.224(3)   |
| C10B_68-H10D_68 | 0.9800   | AI1_69-C3A_69   | 2.235(3)   |
| C10B_68-H10E_68 | 0.9800   | AI1_69-C5A_69   | 2.235(4)   |
| C10B_68-H10F_68 | 0.9800   | AI1_69-C4A_69   | 2.249(3)   |
| C9B_68-H9BA_68  | 0.9800   | C1A_69-C2A_69   | 1.418(5)   |
| C9B_68-H9BB_68  | 0.9800   | C1A_69-C5A_69   | 1.436(6)   |
| C9B_68-H9BC_68  | 0.9800   | C1A_69-C6A_69   | 1.502(6)   |
| C8B_68-H8BA_68  | 0.9800   | C2A_69-C3A_69   | 1.407(5)   |
| C8B_68-H8BB_68  | 0.9800   | C2A_69-C7A_69   | 1.509(5)   |
| C8B_68-H8BC_68  | 0.9800   | C3A_69-C4A_69   | 1.402(5)   |
| C7B_68-H7BA_68  | 0.9800   | C3A_69-C8A_69   | 1.510(5)   |
| C7B_68-H7BB_68  | 0.9800   | C4A_69-C5A_69   | 1.408(6)   |
| C7B_68-H7BC_68  | 0.9800   | C4A_69-C9A_69   | 1.507(6)   |
| C6B_68-H6BA_68  | 0.9800   | C5A_69-C10A_69  | 1.513(6)   |

|                 |          |                 |           |
|-----------------|----------|-----------------|-----------|
| C10A_69-H10A_69 | 0.9800   | C9C_69-H9CC_69  | 0.9800    |
| C10A_69-H10B_69 | 0.9800   | C8C_69-H8CA_69  | 0.9800    |
| C10A_69-H10C_69 | 0.9800   | C8C_69-H8CB_69  | 0.9800    |
| C9A_69-H9AA_69  | 0.9800   | C8C_69-H8CC_69  | 0.9800    |
| C9A_69-H9AB_69  | 0.9800   | C7C_69-H7CA_69  | 0.9800    |
| C9A_69-H9AC_69  | 0.9800   | C7C_69-H7CB_69  | 0.9800    |
| C8A_69-H8AA_69  | 0.9800   | C7C_69-H7CC_69  | 0.9800    |
| C8A_69-H8AB_69  | 0.9800   | C6C_69-H6CA_69  | 0.9800    |
| C8A_69-H8AC_69  | 0.9800   | C6C_69-H6CB_69  | 0.9800    |
| C7A_69-H7AA_69  | 0.9800   | C6C_69-H6CC_69  | 0.9800    |
| C7A_69-H7AB_69  | 0.9800   | ln1_47-Al3_47   | 2.734(13) |
| C7A_69-H7AC_69  | 0.9800   | ln1_47-Al2_47   | 2.734(13) |
| C6A_69-H6AA_69  | 0.9800   | ln1_47-Al1_47   | 2.746(12) |
| C6A_69-H6AB_69  | 0.9800   | Al2_47-C5B_47   | 2.207(15) |
| C6A_69-H6AC_69  | 0.9800   | Al2_47-C1B_47   | 2.219(15) |
| C1B_69-C5B_69   | 1.408(6) | Al2_47-C4B_47   | 2.220(15) |
| C1B_69-C2B_69   | 1.423(5) | Al2_47-C3B_47   | 2.229(15) |
| C1B_69-C6B_69   | 1.518(6) | Al2_47-C2B_47   | 2.230(15) |
| C2B_69-C3B_69   | 1.407(6) | Al3_47-C1C_47   | 2.217(15) |
| C2B_69-C7B_69   | 1.504(6) | Al3_47-C2C_47   | 2.221(15) |
| C3B_69-C4B_69   | 1.416(6) | Al3_47-C5C_47   | 2.229(15) |
| C3B_69-C8B_69   | 1.512(6) | Al3_47-C4C_47   | 2.240(15) |
| C4B_69-C5B_69   | 1.437(6) | Al3_47-C3C_47   | 2.242(15) |
| C4B_69-C9B_69   | 1.492(7) | Al1_47-C2A_47   | 2.226(15) |
| C5B_69-C10B_69  | 1.502(5) | Al1_47-C1A_47   | 2.228(15) |
| C10B_69-H10D_69 | 0.9800   | Al1_47-C3A_47   | 2.232(15) |
| C10B_69-H10E_69 | 0.9800   | Al1_47-C4A_47   | 2.239(15) |
| C10B_69-H10F_69 | 0.9800   | Al1_47-C5A_47   | 2.246(15) |
| C9B_69-H9BA_69  | 0.9800   | C1A_47-C2A_47   | 1.426(15) |
| C9B_69-H9BB_69  | 0.9800   | C1A_47-C5A_47   | 1.426(14) |
| C9B_69-H9BC_69  | 0.9800   | C1A_47-C6A_47   | 1.503(15) |
| C8B_69-H8BA_69  | 0.9800   | C2A_47-C3A_47   | 1.422(14) |
| C8B_69-H8BB_69  | 0.9800   | C2A_47-C7A_47   | 1.512(15) |
| C8B_69-H8BC_69  | 0.9800   | C3A_47-C4A_47   | 1.417(14) |
| C7B_69-H7BA_69  | 0.9800   | C3A_47-C8A_47   | 1.504(15) |
| C7B_69-H7BB_69  | 0.9800   | C4A_47-C5A_47   | 1.421(15) |
| C7B_69-H7BC_69  | 0.9800   | C4A_47-C9A_47   | 1.510(15) |
| C6B_69-H6BA_69  | 0.9800   | C5A_47-C10A_47  | 1.513(15) |
| C6B_69-H6BB_69  | 0.9800   | C10A_47-H10A_47 | 0.9800    |
| C6B_69-H6BC_69  | 0.9800   | C10A_47-H10B_47 | 0.9800    |
| C1C_69-C5C_69   | 1.419(6) | C10A_47-H10C_47 | 0.9800    |
| C1C_69-C2C_69   | 1.423(6) | C9A_47-H9AA_47  | 0.9800    |
| C1C_69-C6C_69   | 1.496(6) | C9A_47-H9AB_47  | 0.9800    |
| C2C_69-C3C_69   | 1.428(6) | C9A_47-H9AC_47  | 0.9800    |
| C2C_69-C7C_69   | 1.504(6) | C8A_47-H8AA_47  | 0.9800    |
| C3C_69-C4C_69   | 1.430(6) | C8A_47-H8AB_47  | 0.9800    |
| C3C_69-C8C_69   | 1.494(6) | C8A_47-H8AC_47  | 0.9800    |
| C4C_69-C5C_69   | 1.433(5) | C7A_47-H7AA_47  | 0.9800    |
| C4C_69-C9C_69   | 1.487(6) | C7A_47-H7AB_47  | 0.9800    |
| C5C_69-C10C_69  | 1.497(6) | C7A_47-H7AC_47  | 0.9800    |
| C10C_69-H10G_69 | 0.9800   | C6A_47-H6AA_47  | 0.9800    |
| C10C_69-H10H_69 | 0.9800   | C6A_47-H6AB_47  | 0.9800    |
| C10C_69-H10I_69 | 0.9800   | C6A_47-H6AC_47  | 0.9800    |
| C9C_69-H9CA_69  | 0.9800   | C1B_47-C5B_47   | 1.415(15) |
| C9C_69-H9CB_69  | 0.9800   | C1B_47-C2B_47   | 1.418(14) |

|                 |           |                 |           |
|-----------------|-----------|-----------------|-----------|
| C1B_47-C6B_47   | 1.520(15) | AI2_48-C4B_48   | 2.227(15) |
| C2B_47-C3B_47   | 1.417(15) | AI3_48-C1C_48   | 2.225(15) |
| C2B_47-C7B_47   | 1.511(15) | AI3_48-C2C_48   | 2.240(15) |
| C3B_47-C4B_47   | 1.421(15) | AI3_48-C5C_48   | 2.250(15) |
| C3B_47-C8B_47   | 1.506(15) | AI3_48-C3C_48   | 2.266(15) |
| C4B_47-C5B_47   | 1.434(15) | AI3_48-C4C_48   | 2.274(15) |
| C4B_47-C9B_47   | 1.504(15) | AI1_48-C3A_48   | 2.220(15) |
| C5B_47-C10B_47  | 1.509(15) | AI1_48-C4A_48   | 2.225(15) |
| C10B_47-H10D_47 | 0.9800    | AI1_48-C1A_48   | 2.224(15) |
| C10B_47-H10E_47 | 0.9800    | AI1_48-C2A_48   | 2.228(15) |
| C10B_47-H10F_47 | 0.9800    | AI1_48-C5A_48   | 2.251(15) |
| C9B_47-H9BA_47  | 0.9800    | C1A_48-C5A_48   | 1.424(14) |
| C9B_47-H9BB_47  | 0.9800    | C1A_48-C2A_48   | 1.426(14) |
| C9B_47-H9BC_47  | 0.9800    | C1A_48-C6A_48   | 1.505(15) |
| C8B_47-H8BA_47  | 0.9800    | C2A_48-C3A_48   | 1.422(14) |
| C8B_47-H8BB_47  | 0.9800    | C2A_48-C7A_48   | 1.511(15) |
| C8B_47-H8BC_47  | 0.9800    | C3A_48-C4A_48   | 1.417(14) |
| C7B_47-H7BA_47  | 0.9800    | C3A_48-C8A_48   | 1.498(14) |
| C7B_47-H7BB_47  | 0.9800    | C4A_48-C5A_48   | 1.418(15) |
| C7B_47-H7BC_47  | 0.9800    | C4A_48-C9A_48   | 1.506(15) |
| C6B_47-H6BA_47  | 0.9800    | C5A_48-C10A_48  | 1.505(15) |
| C6B_47-H6BB_47  | 0.9800    | C10A_48-H10A_48 | 0.9800    |
| C6B_47-H6BC_47  | 0.9800    | C10A_48-H10B_48 | 0.9800    |
| C1C_47-C2C_47   | 1.426(15) | C10A_48-H10C_48 | 0.9800    |
| C1C_47-C5C_47   | 1.431(15) | C9A_48-H9AA_48  | 0.9800    |
| C1C_47-C6C_47   | 1.497(15) | C9A_48-H9AB_48  | 0.9800    |
| C2C_47-C3C_47   | 1.415(15) | C9A_48-H9AC_48  | 0.9800    |
| C2C_47-C7C_47   | 1.514(15) | C8A_48-H8AA_48  | 0.9800    |
| C3C_47-C4C_47   | 1.422(15) | C8A_48-H8AB_48  | 0.9800    |
| C3C_47-C8C_47   | 1.513(15) | C8A_48-H8AC_48  | 0.9800    |
| C4C_47-C5C_47   | 1.424(15) | C7A_48-H7AA_48  | 0.9800    |
| C4C_47-C9C_47   | 1.490(15) | C7A_48-H7AB_48  | 0.9800    |
| C5C_47-C10C_47  | 1.503(15) | C7A_48-H7AC_48  | 0.9800    |
| C10C_47-H10G_47 | 0.9800    | C6A_48-H6AA_48  | 0.9800    |
| C10C_47-H10H_47 | 0.9800    | C6A_48-H6AB_48  | 0.9800    |
| C10C_47-H10I_47 | 0.9800    | C6A_48-H6AC_48  | 0.9800    |
| C9C_47-H9CA_47  | 0.9800    | C1B_48-C5B_48   | 1.415(14) |
| C9C_47-H9CB_47  | 0.9800    | C1B_48-C2B_48   | 1.418(14) |
| C9C_47-H9CC_47  | 0.9800    | C1B_48-C6B_48   | 1.519(15) |
| C8C_47-H8CA_47  | 0.9800    | C2B_48-C3B_48   | 1.411(15) |
| C8C_47-H8CB_47  | 0.9800    | C2B_48-C7B_48   | 1.509(15) |
| C8C_47-H8CC_47  | 0.9800    | C3B_48-C4B_48   | 1.431(15) |
| C7C_47-H7CA_47  | 0.9800    | C3B_48-C8B_48   | 1.501(15) |
| C7C_47-H7CB_47  | 0.9800    | C4B_48-C5B_48   | 1.435(14) |
| C7C_47-H7CC_47  | 0.9800    | C4B_48-C9B_48   | 1.505(15) |
| C6C_47-H6CA_47  | 0.9800    | C5B_48-C10B_48  | 1.514(15) |
| C6C_47-H6CB_47  | 0.9800    | C10B_48-H10D_48 | 0.9800    |
| C6C_47-H6CC_47  | 0.9800    | C10B_48-H10E_48 | 0.9800    |
| In1_48-AI3_48   | 2.716(10) | C10B_48-H10F_48 | 0.9800    |
| In1_48-AI2_48   | 2.742(13) | C9B_48-H9BA_48  | 0.9800    |
| In1_48-AI1_48   | 2.752(11) | C9B_48-H9BB_48  | 0.9800    |
| AI2_48-C5B_48   | 2.211(15) | C9B_48-H9BC_48  | 0.9800    |
| AI2_48-C1B_48   | 2.213(15) | C8B_48-H8BA_48  | 0.9800    |
| AI2_48-C2B_48   | 2.217(15) | C8B_48-H8BB_48  | 0.9800    |
| AI2_48-C3B_48   | 2.221(15) | C8B_48-H8BC_48  | 0.9800    |

|                 |           |                |           |
|-----------------|-----------|----------------|-----------|
| C7B_48-H7BA_48  | 0.9800    | C10_49-H10C_49 | 0.9800    |
| C7B_48-H7BB_48  | 0.9800    | O1_50-C1_50    | 1.350(12) |
| C7B_48-H7BC_48  | 0.9800    | C1_50-C2_50    | 1.548(12) |
| C6B_48-H6BA_48  | 0.9800    | C1_50-C4_50    | 1.548(12) |
| C6B_48-H6BB_48  | 0.9800    | C1_50-C3_50    | 1.549(12) |
| C6B_48-H6BC_48  | 0.9800    | C2_50-F3_50    | 1.310(13) |
| C1C_48-C2C_48   | 1.424(14) | C2_50-F2_50    | 1.338(12) |
| C1C_48-C5C_48   | 1.426(14) | C2_50-F1_50    | 1.346(13) |
| C1C_48-C6C_48   | 1.498(15) | C3_50-F4_50    | 1.317(13) |
| C2C_48-C3C_48   | 1.404(14) | C3_50-F5_50    | 1.345(13) |
| C2C_48-C7C_48   | 1.510(14) | C3_50-F6_50    | 1.346(12) |
| C3C_48-C4C_48   | 1.420(14) | C4_50-F9_50    | 1.320(13) |
| C3C_48-C8C_48   | 1.514(14) | C4_50-F8_50    | 1.331(13) |
| C4C_48-C5C_48   | 1.417(14) | C4_50-F7_50    | 1.346(13) |
| C4C_48-C9C_48   | 1.498(14) | O1_22-C1_22    | 1.348(8)  |
| C5C_48-C10C_48  | 1.496(14) | C1_22-C3_22    | 1.545(9)  |
| C10C_48-H10G_48 | 0.9800    | C1_22-C2_22    | 1.550(9)  |
| C10C_48-H10H_48 | 0.9800    | C1_22-C4_22    | 1.559(9)  |
| C10C_48-H10I_48 | 0.9800    | C2_22-F2_22    | 1.285(8)  |
| C9C_48-H9CA_48  | 0.9800    | C2_22-F3_22    | 1.338(8)  |
| C9C_48-H9CB_48  | 0.9800    | C2_22-F1_22    | 1.371(11) |
| C9C_48-H9CC_48  | 0.9800    | C3_22-F6_22    | 1.321(8)  |
| C8C_48-H8CA_48  | 0.9800    | C3_22-F4_22    | 1.334(9)  |
| C8C_48-H8CB_48  | 0.9800    | C3_22-F5_22    | 1.341(10) |
| C8C_48-H8CC_48  | 0.9800    | C4_22-F9_22    | 1.324(10) |
| C7C_48-H7CA_48  | 0.9800    | C4_22-F8_22    | 1.327(10) |
| C7C_48-H7CB_48  | 0.9800    | C4_22-F7_22    | 1.331(10) |
| C7C_48-H7CC_48  | 0.9800    | O1_51-C1_51    | 1.347(12) |
| C6C_48-H6CA_48  | 0.9800    | C1_51-C4_51    | 1.539(12) |
| C6C_48-H6CB_48  | 0.9800    | C1_51-C3_51    | 1.550(12) |
| C6C_48-H6CC_48  | 0.9800    | C1_51-C2_51    | 1.567(12) |
| C1_49-C2_49     | 1.412(11) | C2_51-F2_51    | 1.313(13) |
| C1_49-C5_49     | 1.413(10) | C2_51-F3_51    | 1.323(13) |
| C1_49-C10_49    | 1.495(11) | C2_51-F1_51    | 1.341(13) |
| C2_49-C3_49     | 1.401(12) | C3_51-F6_51    | 1.315(13) |
| C2_49-C9_49     | 1.521(12) | C3_51-F4_51    | 1.329(13) |
| C3_49-C4_49     | 1.420(12) | C3_51-F5_51    | 1.343(13) |
| C3_49-C8_49     | 1.496(12) | C4_51-F9_51    | 1.324(13) |
| C4_49-C5_49     | 1.426(12) | C4_51-F7_51    | 1.333(13) |
| C4_49-C7_49     | 1.490(12) | C4_51-F8_51    | 1.352(13) |
| C5_49-C6_49     | 1.509(11) | O1_32-C1_32    | 1.339(12) |
| C6_49-H6A_49    | 0.9800    | C1_32-C2_32    | 1.532(11) |
| C6_49-H6B_49    | 0.9800    | C1_32-C4_32    | 1.546(12) |
| C6_49-H6C_49    | 0.9800    | C1_32-C3_32    | 1.564(12) |
| C7_49-H7A_49    | 0.9800    | C2_32-F1_32    | 1.310(12) |
| C7_49-H7B_49    | 0.9800    | C2_32-F2_32    | 1.327(12) |
| C7_49-H7C_49    | 0.9800    | C2_32-F3_32    | 1.335(12) |
| C8_49-H8A_49    | 0.9800    | C3_32-F6_32    | 1.324(12) |
| C8_49-H8B_49    | 0.9800    | C3_32-F4_32    | 1.326(12) |
| C8_49-H8C_49    | 0.9800    | C3_32-F5_32    | 1.336(13) |
| C9_49-H9A_49    | 0.9800    | C4_32-F9_32    | 1.323(12) |
| C9_49-H9B_49    | 0.9800    | C4_32-F7_32    | 1.328(12) |
| C9_49-H9C_49    | 0.9800    | C4_32-F8_32    | 1.354(12) |
| C10_49-H10A_49  | 0.9800    | C1_40-C5_40    | 1.424(6)  |
| C10_49-H10B_49  | 0.9800    | C1_40-C2_40    | 1.432(5)  |

|                |          |                       |                  |
|----------------|----------|-----------------------|------------------|
| C1_40–C10_40   | 1.502(6) | C4_53–C5_53           | 1.431(8)         |
| C2_40–C3_40    | 1.416(5) | C4_53–C7_53           | 1.493(8)         |
| C2_40–C9_40    | 1.497(5) | C5_53–C6_53           | 1.513(8)         |
| C3_40–C4_40    | 1.394(6) | C6_53–H6A_53          | 0.9800           |
| C3_40–C8_40    | 1.499(6) | C6_53–H6B_53          | 0.9800           |
| C4_40–C5_40    | 1.409(6) | C6_53–H6C_53          | 0.9800           |
| C4_40–C7_40    | 1.510(6) | C7_53–H7A_53          | 0.9800           |
| C5_40–C6_40    | 1.496(6) | C7_53–H7B_53          | 0.9800           |
| C6_40–H6A_40   | 0.9800   | C7_53–H7C_53          | 0.9800           |
| C6_40–H6B_40   | 0.9800   | C8_53–H8A_53          | 0.9800           |
| C6_40–H6C_40   | 0.9800   | C8_53–H8B_53          | 0.9800           |
| C7_40–H7A_40   | 0.9800   | C8_53–H8C_53          | 0.9800           |
| C7_40–H7B_40   | 0.9800   | C9_53–H9A_53          | 0.9800           |
| C7_40–H7C_40   | 0.9800   | C9_53–H9B_53          | 0.9800           |
| C8_40–H8A_40   | 0.9800   | C9_53–H9C_53          | 0.9800           |
| C8_40–H8B_40   | 0.9800   | C10_53–H10A_53        | 0.9800           |
| C8_40–H8C_40   | 0.9800   | C10_53–H10B_53        | 0.9800           |
| C9_40–H9A_40   | 0.9800   | C10_53–H10C_53        | 0.9800           |
| C9_40–H9B_40   | 0.9800   |                       |                  |
| C9_40–H9C_40   | 0.9800   | <b>Atom–Atom–Atom</b> | <b>Angle [°]</b> |
| C10_40–H10A_40 | 0.9800   | O1_44–Al16–O1_67      | 106.7(10)        |
| C10_40–H10B_40 | 0.9800   | O1_12–Al16–O1_10      | 108.8(4)         |
| C10_40–H10C_40 | 0.9800   | O1_44–Al16–O1_29      | 122.0(5)         |
| C1_52–C2_52    | 1.413(5) | O1_67–Al16–O1_29      | 111.6(12)        |
| C1_52–C5_52    | 1.427(4) | O1_44–Al16–O1_23      | 116.0(5)         |
| C1_52–C10_52   | 1.502(5) | O1_67–Al16–O1_23      | 113.4(11)        |
| C2_52–C3_52    | 1.432(6) | O1_29–Al16–O1_23      | 86.4(4)          |
| C2_52–C9_52    | 1.511(5) | O1_12–Al16–O1_11      | 124.1(4)         |
| C3_52–C4_52    | 1.422(5) | O1_10–Al16–O1_11      | 110.06(17)       |
| C3_52–C8_52    | 1.501(5) | O1_12–Al16–O1_9       | 96.0(3)          |
| C4_52–C5_52    | 1.420(4) | O1_10–Al16–O1_9       | 109.3(2)         |
| C4_52–C7_52    | 1.499(5) | O1_11–Al16–O1_9       | 107.05(17)       |
| C5_52–C6_52    | 1.502(4) | O1_15–Al17–O1_13      | 110.2(3)         |
| C6_52–H6A_52   | 0.9800   | O1_15–Al17–O1_20      | 109.3(2)         |
| C6_52–H6B_52   | 0.9800   | O1_13–Al17–O1_20      | 113.3(4)         |
| C6_52–H6C_52   | 0.9800   | O1_30–Al17–O1_31      | 114.1(6)         |
| C7_52–H7A_52   | 0.9800   | O1_30–Al17–O1_24      | 115.9(4)         |
| C7_52–H7B_52   | 0.9800   | O1_31–Al17–O1_24      | 104.0(6)         |
| C7_52–H7C_52   | 0.9800   | O1_30–Al17–O1_25      | 110.0(4)         |
| C8_52–H8A_52   | 0.9800   | O1_31–Al17–O1_25      | 109.3(8)         |
| C8_52–H8B_52   | 0.9800   | O1_24–Al17–O1_25      | 102.7(3)         |
| C8_52–H8C_52   | 0.9800   | O1_15–Al17–O1_14      | 109.9(2)         |
| C9_52–H9A_52   | 0.9800   | O1_13–Al17–O1_14      | 106.8(4)         |
| C9_52–H9B_52   | 0.9800   | O1_20–Al17–O1_14      | 107.4(2)         |
| C9_52–H9C_52   | 0.9800   | O1_38–Al18–O1_32      | 103.1(11)        |
| C10_52–H10A_52 | 0.9800   | O1_22–Al18–O1_16      | 121.8(7)         |
| C10_52–H10B_52 | 0.9800   | O1_63–Al18–O1_33      | 99.7(15)         |
| C10_52–H10C_52 | 0.9800   | O1_51–Al18–O1_65      | 109.7(12)        |
| C1_53–C5_53    | 1.409(8) | O1_63–Al18–O1_28      | 108.3(16)        |
| C1_53–C2_53    | 1.408(7) | O1_33–Al18–O1_28      | 107.0(12)        |
| C1_53–C10_53   | 1.520(7) | O1_22–Al18–O1_17      | 106.4(5)         |
| C2_53–C3_53    | 1.413(7) | O1_16–Al18–O1_17      | 108.9(7)         |
| C2_53–C9_53    | 1.529(8) | O1_63–Al18–O1_27      | 106.5(15)        |
| C3_53–C4_53    | 1.432(8) | O1_33–Al18–O1_27      | 106.4(8)         |
| C3_53–C8_53    | 1.493(7) | O1_28–Al18–O1_27      | 125.9(9)         |

|                  |            |                 |            |
|------------------|------------|-----------------|------------|
| O1_22-AI18-O1_21 | 108.2(5)   | C5_40-AI3-C3_40 | 61.47(16)  |
| O1_16-AI18-O1_21 | 103.4(7)   | C2_40-AI3-C3_40 | 36.90(13)  |
| O1_17-AI18-O1_21 | 107.5(6)   | C4_40-AI3-C3_40 | 36.13(15)  |
| O1_26-AI19-O1_42 | 108.6(10)  | C1_40-AI3-In1   | 170.09(12) |
| O1_8-AI19-O1_5   | 118.5(4)   | C5_40-AI3-In1   | 141.64(12) |
| O1_8-AI19-O1_6   | 84.3(3)    | C2_40-AI3-In1   | 150.46(11) |
| O1_5-AI19-O1_6   | 112.7(2)   | C4_40-AI3-In1   | 123.82(11) |
| O1_8-AI19-O1_7   | 116.1(4)   | C3_40-AI3-In1   | 127.40(11) |
| O1_5-AI19-O1_7   | 106.7(4)   | C4_53-AI1-C3_53 | 38.3(2)    |
| O1_6-AI19-O1_7   | 117.7(5)   | C4_53-AI1-C5_53 | 38.2(2)    |
| O1_26-AI19-O1_46 | 106.9(5)   | C3_53-AI1-C5_53 | 63.8(2)    |
| O1_42-AI19-O1_46 | 119.8(8)   | C4_53-AI1-C2_53 | 62.6(2)    |
| O1_26-AI19-O1_43 | 89.8(5)    | C3_53-AI1-C2_53 | 37.3(2)    |
| O1_42-AI19-O1_43 | 93.3(9)    | C5_53-AI1-C2_53 | 62.3(2)    |
| O1_46-AI19-O1_43 | 133.7(4)   | C3_49-AI1-C4_49 | 37.1(4)    |
| O1_37-AI20-O1_36 | 114.6(6)   | C4_53-AI1-C1_53 | 62.5(2)    |
| O1_37-AI20-O1_35 | 108.6(10)  | C3_53-AI1-C1_53 | 62.52(19)  |
| O1_36-AI20-O1_35 | 111.1(10)  | C5_53-AI1-C1_53 | 37.0(2)    |
| O1_4-AI20-O1_1   | 109.6(3)   | C2_53-AI1-C1_53 | 36.80(17)  |
| O1_4-AI20-O1_2   | 106.2(3)   | C3_49-AI1-C2_49 | 35.8(3)    |
| O1_1-AI20-O1_2   | 119.0(3)   | C4_49-AI1-C2_49 | 59.7(5)    |
| O1_50-AI20-O1_62 | 115.9(9)   | C3_49-AI1-C5_49 | 59.8(4)    |
| O1_37-AI20-O1_34 | 107.0(6)   | C4_49-AI1-C5_49 | 35.6(4)    |
| O1_36-AI20-O1_34 | 108.2(5)   | C2_49-AI1-C5_49 | 58.0(4)    |
| O1_35-AI20-O1_34 | 106.8(9)   | C3_49-AI1-C1_49 | 58.8(4)    |
| O1_4-AI20-O1_3   | 111.4(4)   | C4_49-AI1-C1_49 | 58.3(5)    |
| O1_1-AI20-O1_3   | 104.9(3)   | C2_49-AI1-C1_49 | 34.5(3)    |
| O1_2-AI20-O1_3   | 105.7(4)   | C5_49-AI1-C1_49 | 34.0(3)    |
| O1_50-AI20-O1_61 | 104.3(6)   | C4_53-AI1-In1   | 125.44(19) |
| O1_62-AI20-O1_61 | 114.1(10)  | C3_53-AI1-In1   | 111.01(15) |
| AI3-In1-AI2      | 70.07(4)   | C5_53-AI1-In1   | 160.1(2)   |
| AI3-In1-AI1      | 70.96(4)   | C2_53-AI1-In1   | 126.45(14) |
| AI2-In1-AI1      | 70.53(4)   | C3_49-AI1-In1   | 145.0(4)   |
| C5_52-AI2-C1_52  | 37.31(11)  | C4_49-AI1-In1   | 166.5(4)   |
| C5_52-AI2-C2_52  | 61.75(12)  | C1_53-AI1-In1   | 160.10(17) |
| C1_52-AI2-C2_52  | 36.76(13)  | C2_49-AI1-In1   | 114.9(3)   |
| C5_52-AI2-C4_52  | 36.94(11)  | C5_49-AI1-In1   | 130.9(3)   |
| C1_52-AI2-C4_52  | 61.85(12)  | C1_49-AI1-In1   | 109.7(2)   |
| C2_52-AI2-C4_52  | 61.61(14)  | C1_1-O1_1-AI20  | 151.7(4)   |
| C5_52-AI2-C3_52  | 61.50(12)  | O1_1-C1_1-C2_1  | 109.5(4)   |
| C1_52-AI2-C3_52  | 61.58(13)  | O1_1-C1_1-C4_1  | 110.5(4)   |
| C2_52-AI2-C3_52  | 36.98(14)  | C2_1-C1_1-C4_1  | 112.0(5)   |
| C4_52-AI2-C3_52  | 36.66(13)  | O1_1-C1_1-C3_1  | 111.0(5)   |
| C5_52-AI2-In1    | 166.58(9)  | C2_1-C1_1-C3_1  | 107.9(4)   |
| C1_52-AI2-In1    | 155.76(10) | C4_1-C1_1-C3_1  | 106.0(5)   |
| C2_52-AI2-In1    | 126.64(10) | F3_1-C2_1-F2_1  | 107.7(6)   |
| C4_52-AI2-In1    | 133.81(9)  | F3_1-C2_1-F1_1  | 106.9(6)   |
| C3_52-AI2-In1    | 117.55(10) | F2_1-C2_1-F1_1  | 108.4(5)   |
| C1_40-AI3-C5_40  | 37.77(15)  | F3_1-C2_1-C1_1  | 111.1(5)   |
| C1_40-AI3-C2_40  | 37.95(14)  | F2_1-C2_1-C1_1  | 112.8(5)   |
| C5_40-AI3-C2_40  | 62.48(14)  | F1_1-C2_1-C1_1  | 109.7(5)   |
| C1_40-AI3-C4_40  | 62.27(15)  | F4_1-C3_1-F5_1  | 107.2(6)   |
| C5_40-AI3-C4_40  | 36.89(16)  | F4_1-C3_1-F6_1  | 107.6(5)   |
| C2_40-AI3-C4_40  | 61.41(13)  | F5_1-C3_1-F6_1  | 107.6(5)   |
| C1_40-AI3-C3_40  | 62.38(14)  | F4_1-C3_1-C1_1  | 111.0(5)   |



|                |           |                |          |
|----------------|-----------|----------------|----------|
| F5_1-C3_1-C1_1 | 111.2(5)  | F9_3-C4_3-C1_3 | 111.0(7) |
| F6_1-C3_1-C1_1 | 112.1(5)  | F8_3-C4_3-C1_3 | 112.2(8) |
| F7_1-C4_1-F8_1 | 109.4(6)  | F7_3-C4_3-C1_3 | 111.3(7) |
| F7_1-C4_1-F9_1 | 109.7(7)  | C1_4-O1_4-AI20 | 149.1(6) |
| F8_1-C4_1-F9_1 | 105.0(7)  | O1_4-C1_4-C3_4 | 110.8(7) |
| F7_1-C4_1-C1_1 | 113.0(6)  | O1_4-C1_4-C4_4 | 109.5(7) |
| F8_1-C4_1-C1_1 | 111.8(5)  | C3_4-C1_4-C4_4 | 117.3(7) |
| F9_1-C4_1-C1_1 | 107.6(5)  | O1_4-C1_4-C2_4 | 104.8(7) |
| C1_2-O1_2-AI20 | 147.0(7)  | C3_4-C1_4-C2_4 | 105.3(7) |
| O1_2-C1_2-C3_2 | 108.3(6)  | C4_4-C1_4-C2_4 | 108.2(7) |
| O1_2-C1_2-C2_2 | 110.3(6)  | F1_4-C2_4-F3_4 | 115.3(9) |
| C3_2-C1_2-C2_2 | 109.3(6)  | F1_4-C2_4-F2_4 | 105.6(9) |
| O1_2-C1_2-C4_2 | 110.9(6)  | F3_4-C2_4-F2_4 | 109.2(8) |
| C3_2-C1_2-C4_2 | 109.9(6)  | F1_4-C2_4-C1_4 | 107.9(8) |
| C2_2-C1_2-C4_2 | 108.2(6)  | F3_4-C2_4-C1_4 | 109.6(7) |
| F3_2-C2_2-F1_2 | 108.5(8)  | F2_4-C2_4-C1_4 | 109.2(8) |
| F3_2-C2_2-F2_2 | 106.7(7)  | F4_4-C3_4-F5_4 | 107.1(9) |
| F1_2-C2_2-F2_2 | 106.7(7)  | F4_4-C3_4-F6_4 | 107.3(9) |
| F3_2-C2_2-C1_2 | 110.9(7)  | F5_4-C3_4-F6_4 | 100.4(8) |
| F1_2-C2_2-C1_2 | 111.4(6)  | F4_4-C3_4-C1_4 | 110.9(8) |
| F2_2-C2_2-C1_2 | 112.4(7)  | F5_4-C3_4-C1_4 | 112.0(8) |
| F4_2-C3_2-F5_2 | 107.8(7)  | F6_4-C3_4-C1_4 | 118.3(8) |
| F4_2-C3_2-F6_2 | 108.2(7)  | F7_4-C4_4-F9_4 | 103.3(8) |
| F5_2-C3_2-F6_2 | 107.8(6)  | F7_4-C4_4-F8_4 | 101.5(8) |
| F4_2-C3_2-C1_2 | 110.8(6)  | F9_4-C4_4-F8_4 | 112.1(8) |
| F5_2-C3_2-C1_2 | 110.5(6)  | F7_4-C4_4-C1_4 | 109.3(7) |
| F6_2-C3_2-C1_2 | 111.6(6)  | F9_4-C4_4-C1_4 | 114.9(7) |
| F9_2-C4_2-F7_2 | 107.8(7)  | F8_4-C4_4-C1_4 | 114.1(7) |
| F9_2-C4_2-F8_2 | 107.6(7)  | C1_5-O1_5-AI19 | 152.7(4) |
| F7_2-C4_2-F8_2 | 107.8(7)  | O1_5-C1_5-C2_5 | 112.2(5) |
| F9_2-C4_2-C1_2 | 111.3(6)  | O1_5-C1_5-C3_5 | 111.7(4) |
| F7_2-C4_2-C1_2 | 109.4(6)  | C2_5-C1_5-C3_5 | 108.7(5) |
| F8_2-C4_2-C1_2 | 112.8(6)  | O1_5-C1_5-C4_5 | 104.8(4) |
| C1_3-O1_3-AI20 | 145.3(7)  | C2_5-C1_5-C4_5 | 109.3(4) |
| O1_3-C1_3-C4_3 | 114.3(7)  | C3_5-C1_5-C4_5 | 110.0(4) |
| O1_3-C1_3-C2_3 | 107.8(8)  | F1_5-C2_5-F3_5 | 107.4(6) |
| C4_3-C1_3-C2_3 | 107.7(7)  | F1_5-C2_5-F2_5 | 104.2(6) |
| O1_3-C1_3-C3_3 | 108.9(7)  | F3_5-C2_5-F2_5 | 112.6(7) |
| C4_3-C1_3-C3_3 | 108.1(7)  | F1_5-C2_5-C1_5 | 113.0(6) |
| C2_3-C1_3-C3_3 | 110.1(7)  | F3_5-C2_5-C1_5 | 108.2(5) |
| F3_3-C2_3-F1_3 | 106.1(8)  | F2_5-C2_5-C1_5 | 111.4(5) |
| F3_3-C2_3-F2_3 | 107.9(10) | F6_5-C3_5-F4_5 | 107.3(5) |
| F1_3-C2_3-F2_3 | 107.8(11) | F6_5-C3_5-F5_5 | 109.5(5) |
| F3_3-C2_3-C1_3 | 111.2(7)  | F4_5-C3_5-F5_5 | 108.1(5) |
| F1_3-C2_3-C1_3 | 110.9(7)  | F6_5-C3_5-C1_5 | 111.5(4) |
| F2_3-C2_3-C1_3 | 112.7(10) | F4_5-C3_5-C1_5 | 109.8(5) |
| F6_3-C3_3-F4_3 | 110.6(8)  | F5_5-C3_5-C1_5 | 110.5(5) |
| F6_3-C3_3-F5_3 | 108.5(8)  | F9_5-C4_5-F8_5 | 104.4(5) |
| F4_3-C3_3-F5_3 | 104.7(7)  | F9_5-C4_5-F7_5 | 110.7(6) |
| F6_3-C3_3-C1_3 | 113.4(8)  | F8_5-C4_5-F7_5 | 110.6(5) |
| F4_3-C3_3-C1_3 | 110.2(7)  | F9_5-C4_5-C1_5 | 109.8(5) |
| F5_3-C3_3-C1_3 | 109.1(7)  | F8_5-C4_5-C1_5 | 112.0(5) |
| F9_3-C4_3-F8_3 | 108.7(8)  | F7_5-C4_5-C1_5 | 109.3(5) |
| F9_3-C4_3-F7_3 | 105.3(8)  | C1_6-O1_6-AI19 | 149.6(5) |
| F8_3-C4_3-F7_3 | 108.0(8)  | O1_6-C1_6-C4_6 | 110.0(6) |

|                |           |                   |           |
|----------------|-----------|-------------------|-----------|
| O1_6-C1_6-C3_6 | 112.6(6)  | F2_8-C2_8-F3_8    | 111.0(10) |
| C4_6-C1_6-C3_6 | 108.1(6)  | F2_8-C2_8-F1_8    | 107.4(10) |
| O1_6-C1_6-C2_6 | 109.5(6)  | F3_8-C2_8-F1_8    | 108.9(11) |
| C4_6-C1_6-C2_6 | 109.1(7)  | F2_8-C2_8-C1_8    | 111.1(10) |
| C3_6-C1_6-C2_6 | 107.5(6)  | F3_8-C2_8-C1_8    | 109.0(9)  |
| F1_6-C2_6-F2_6 | 109.4(9)  | F1_8-C2_8-C1_8    | 109.4(9)  |
| F1_6-C2_6-F3_6 | 106.2(8)  | F6_8-C3_8-F4_8    | 108.1(9)  |
| F2_6-C2_6-F3_6 | 109.1(9)  | F6_8-C3_8-F5_8    | 92.5(8)   |
| F1_6-C2_6-C1_6 | 110.1(7)  | F4_8-C3_8-F5_8    | 121.6(9)  |
| F2_6-C2_6-C1_6 | 111.1(8)  | F6_8-C3_8-C1_8    | 109.3(8)  |
| F3_6-C2_6-C1_6 | 110.9(8)  | F4_8-C3_8-C1_8    | 110.0(8)  |
| F5_6-C3_6-F4_6 | 106.7(7)  | F5_8-C3_8-C1_8    | 113.4(8)  |
| F5_6-C3_6-F6_6 | 107.1(6)  | F9_8-C4_8-F8_8    | 110.2(11) |
| F4_6-C3_6-F6_6 | 107.6(6)  | F9_8-C4_8-F7_8    | 100.7(10) |
| F5_6-C3_6-C1_6 | 111.5(6)  | F8_8-C4_8-F7_8    | 107.9(11) |
| F4_6-C3_6-C1_6 | 109.8(5)  | F9_8-C4_8-C1_8    | 107.5(8)  |
| F6_6-C3_6-C1_6 | 113.9(7)  | F8_8-C4_8-C1_8    | 115.7(11) |
| F9_6-C4_6-F8_6 | 107.9(7)  | F7_8-C4_8-C1_8    | 113.8(9)  |
| F9_6-C4_6-F7_6 | 106.9(9)  | C1_9-O1_9-AI16    | 147.9(4)  |
| F8_6-C4_6-F7_6 | 109.3(9)  | O1_9-C1_9-C4_9    | 110.1(6)  |
| F9_6-C4_6-C1_6 | 109.8(7)  | O1_9-C1_9-C2_9    | 108.0(6)  |
| F8_6-C4_6-C1_6 | 113.5(8)  | C4_9-C1_9-C2_9    | 108.4(7)  |
| F7_6-C4_6-C1_6 | 109.2(8)  | O1_9-C1_9-C3_9    | 111.1(6)  |
| C1_7-O1_7-AI19 | 146.6(8)  | C4_9-C1_9-C3_9    | 110.1(7)  |
| O1_7-C1_7-C3_7 | 115.4(7)  | C2_9-C1_9-C3_9    | 109.1(7)  |
| O1_7-C1_7-C2_7 | 112.0(8)  | F3_9-C2_9-F1_9    | 106.7(9)  |
| C3_7-C1_7-C2_7 | 109.9(7)  | F3_9-C2_9-F2_9    | 108.2(7)  |
| O1_7-C1_7-C4_7 | 101.6(7)  | F1_9-C2_9-F2_9    | 107.7(9)  |
| C3_7-C1_7-C4_7 | 108.7(6)  | F3_9-C2_9-C1_9    | 110.0(7)  |
| C2_7-C1_7-C4_7 | 108.7(7)  | F1_9-C2_9-C1_9    | 110.0(8)  |
| F1_7-C2_7-F3_7 | 106.1(9)  | F2_9-C2_9-C1_9    | 113.9(8)  |
| F1_7-C2_7-F2_7 | 110.5(10) | F6_9-C3_9-F4_9    | 108.2(9)  |
| F3_7-C2_7-F2_7 | 105.9(7)  | F6_9-C3_9-F5_9    | 107.0(9)  |
| F1_7-C2_7-C1_7 | 110.9(8)  | F4_9-C3_9-F5_9    | 109.8(9)  |
| F3_7-C2_7-C1_7 | 112.0(7)  | F6_9-C3_9-C1_9    | 112.4(8)  |
| F2_7-C2_7-C1_7 | 111.3(7)  | F4_9-C3_9-C1_9    | 110.2(7)  |
| F5_7-C3_7-F4_7 | 107.4(10) | F5_9-C3_9-C1_9    | 109.2(7)  |
| F5_7-C3_7-F6_7 | 106.8(10) | F9_9-C4_9-F7_9    | 104.9(10) |
| F4_7-C3_7-F6_7 | 104.1(11) | F9_9-C4_9-F8_9    | 111.6(9)  |
| F5_7-C3_7-C1_7 | 109.8(7)  | F7_9-C4_9-F8_9    | 105.1(9)  |
| F4_7-C3_7-C1_7 | 113.9(9)  | F9_9-C4_9-C1_9    | 111.0(8)  |
| F6_7-C3_7-C1_7 | 114.3(11) | F7_9-C4_9-C1_9    | 111.7(9)  |
| F8_7-C4_7-F9_7 | 112.4(8)  | F8_9-C4_9-C1_9    | 112.2(8)  |
| F8_7-C4_7-F7_7 | 109.7(6)  | C1_10-O1_10-AI16  | 146.1(3)  |
| F9_7-C4_7-F7_7 | 104.8(8)  | O1_10-C1_10-C4_10 | 109.8(4)  |
| F8_7-C4_7-C1_7 | 113.2(7)  | O1_10-C1_10-C3_10 | 107.3(3)  |
| F9_7-C4_7-C1_7 | 106.8(7)  | C4_10-C1_10-C3_10 | 110.4(3)  |
| F7_7-C4_7-C1_7 | 109.6(6)  | O1_10-C1_10-C2_10 | 112.7(3)  |
| C1_8-O1_8-AI19 | 152.9(8)  | C4_10-C1_10-C2_10 | 108.7(4)  |
| O1_8-C1_8-C3_8 | 113.6(8)  | C3_10-C1_10-C2_10 | 108.1(4)  |
| O1_8-C1_8-C2_8 | 105.6(8)  | F2_10-C2_10-F3_10 | 108.9(5)  |
| C3_8-C1_8-C2_8 | 113.3(8)  | F2_10-C2_10-F1_10 | 106.5(4)  |
| O1_8-C1_8-C4_8 | 106.3(8)  | F3_10-C2_10-F1_10 | 107.7(4)  |
| C3_8-C1_8-C4_8 | 108.1(8)  | F2_10-C2_10-C1_10 | 112.4(4)  |
| C2_8-C1_8-C4_8 | 109.7(8)  | F3_10-C2_10-C1_10 | 110.2(4)  |

|                   |           |                   |           |
|-------------------|-----------|-------------------|-----------|
| F1_10-C2_10-C1_10 | 111.0(4)  | F6_12-C3_12-C1_12 | 113.7(8)  |
| F5_10-C3_10-F6_10 | 107.2(4)  | F5_12-C3_12-C1_12 | 110.6(6)  |
| F5_10-C3_10-F4_10 | 106.5(4)  | F7_12-C4_12-F9_12 | 107.2(7)  |
| F6_10-C3_10-F4_10 | 108.0(4)  | F7_12-C4_12-F8_12 | 110.0(10) |
| F5_10-C3_10-C1_10 | 110.6(4)  | F9_12-C4_12-F8_12 | 108.0(10) |
| F6_10-C3_10-C1_10 | 113.1(4)  | F7_12-C4_12-C1_12 | 110.3(7)  |
| F4_10-C3_10-C1_10 | 111.2(4)  | F9_12-C4_12-C1_12 | 110.2(6)  |
| F9_10-C4_10-F8_10 | 108.4(4)  | F8_12-C4_12-C1_12 | 111.0(10) |
| F9_10-C4_10-F7_10 | 108.2(4)  | C1_13-O1_13-A17   | 150.9(5)  |
| F8_10-C4_10-F7_10 | 106.7(4)  | O1_13-C1_13-C4_13 | 109.9(6)  |
| F9_10-C4_10-C1_10 | 111.3(4)  | O1_13-C1_13-C2_13 | 108.5(5)  |
| F8_10-C4_10-C1_10 | 111.9(4)  | C4_13-C1_13-C2_13 | 110.5(5)  |
| F7_10-C4_10-C1_10 | 110.2(4)  | O1_13-C1_13-C3_13 | 110.7(6)  |
| C1_11-O1_11-A16   | 146.6(3)  | C4_13-C1_13-C3_13 | 109.1(4)  |
| O1_11-C1_11-C3_11 | 111.2(4)  | C2_13-C1_13-C3_13 | 108.2(4)  |
| O1_11-C1_11-C2_11 | 110.2(4)  | F3_13-C2_13-F1_13 | 108.6(6)  |
| C3_11-C1_11-C2_11 | 110.5(5)  | F3_13-C2_13-F2_13 | 108.4(5)  |
| O1_11-C1_11-C4_11 | 107.3(4)  | F1_13-C2_13-F2_13 | 107.6(5)  |
| C3_11-C1_11-C4_11 | 109.1(4)  | F3_13-C2_13-C1_13 | 111.0(5)  |
| C2_11-C1_11-C4_11 | 108.5(4)  | F1_13-C2_13-C1_13 | 109.8(5)  |
| F3_11-C2_11-F2_11 | 108.2(6)  | F2_13-C2_13-C1_13 | 111.3(5)  |
| F3_11-C2_11-F1_11 | 107.3(5)  | F5_13-C3_13-F6_13 | 108.3(5)  |
| F2_11-C2_11-F1_11 | 108.5(6)  | F5_13-C3_13-F4_13 | 107.6(5)  |
| F3_11-C2_11-C1_11 | 110.0(5)  | F6_13-C3_13-F4_13 | 107.0(5)  |
| F2_11-C2_11-C1_11 | 112.0(5)  | F5_13-C3_13-C1_13 | 111.8(5)  |
| F1_11-C2_11-C1_11 | 110.7(5)  | F6_13-C3_13-C1_13 | 112.5(4)  |
| F4_11-C3_11-F6_11 | 107.1(6)  | F4_13-C3_13-C1_13 | 109.4(4)  |
| F4_11-C3_11-F5_11 | 107.1(5)  | F9_13-C4_13-F7_13 | 107.4(5)  |
| F6_11-C3_11-F5_11 | 107.9(6)  | F9_13-C4_13-F8_13 | 107.3(5)  |
| F4_11-C3_11-C1_11 | 111.8(5)  | F7_13-C4_13-F8_13 | 106.2(5)  |
| F6_11-C3_11-C1_11 | 112.1(6)  | F9_13-C4_13-C1_13 | 111.7(5)  |
| F5_11-C3_11-C1_11 | 110.6(5)  | F7_13-C4_13-C1_13 | 111.8(5)  |
| F9_11-C4_11-F7_11 | 107.6(6)  | F8_13-C4_13-C1_13 | 112.1(5)  |
| F9_11-C4_11-F8_11 | 108.7(5)  | C1_14-O1_14-A17   | 148.3(6)  |
| F7_11-C4_11-F8_11 | 106.6(5)  | O1_14-C1_14-C4_14 | 112.1(7)  |
| F9_11-C4_11-C1_11 | 112.3(5)  | O1_14-C1_14-C2_14 | 110.1(6)  |
| F7_11-C4_11-C1_11 | 110.2(5)  | C4_14-C1_14-C2_14 | 110.3(7)  |
| F8_11-C4_11-C1_11 | 111.2(5)  | O1_14-C1_14-C3_14 | 107.0(6)  |
| C1_12-O1_12-A16   | 145.7(10) | C4_14-C1_14-C3_14 | 110.3(7)  |
| O1_12-C1_12-C3_12 | 113.8(8)  | C2_14-C1_14-C3_14 | 106.8(7)  |
| O1_12-C1_12-C4_12 | 99.9(7)   | F3_14-C2_14-F2_14 | 111.8(7)  |
| C3_12-C1_12-C4_12 | 109.0(6)  | F3_14-C2_14-F1_14 | 103.6(8)  |
| O1_12-C1_12-C2_12 | 113.0(8)  | F2_14-C2_14-F1_14 | 99.6(8)   |
| C3_12-C1_12-C2_12 | 110.1(6)  | F3_14-C2_14-C1_14 | 116.8(7)  |
| C4_12-C1_12-C2_12 | 110.5(7)  | F2_14-C2_14-C1_14 | 116.0(6)  |
| F3_12-C2_12-F1_12 | 108.3(7)  | F1_14-C2_14-C1_14 | 106.4(7)  |
| F3_12-C2_12-F2_12 | 105.7(7)  | F4_14-C3_14-F6_14 | 110.7(9)  |
| F1_12-C2_12-F2_12 | 107.1(7)  | F4_14-C3_14-F5_14 | 101.5(9)  |
| F3_12-C2_12-C1_12 | 112.4(7)  | F6_14-C3_14-F5_14 | 107.5(9)  |
| F1_12-C2_12-C1_12 | 112.0(7)  | F4_14-C3_14-C1_14 | 114.0(7)  |
| F2_12-C2_12-C1_12 | 111.0(7)  | F6_14-C3_14-C1_14 | 113.8(9)  |
| F4_12-C3_12-F6_12 | 108.6(7)  | F5_14-C3_14-C1_14 | 108.4(7)  |
| F4_12-C3_12-F5_12 | 105.3(7)  | F9_14-C4_14-F8_14 | 110.8(10) |
| F6_12-C3_12-F5_12 | 106.9(7)  | F9_14-C4_14-F7_14 | 101.8(9)  |
| F4_12-C3_12-C1_12 | 111.3(6)  | F8_14-C4_14-F7_14 | 104.6(9)  |

|                   |           |                   |          |
|-------------------|-----------|-------------------|----------|
| F9_14-C4_14-C1_14 | 116.4(8)  | O1_17-C1_17-C4_17 | 110.8(7) |
| F8_14-C4_14-C1_14 | 115.0(9)  | C2_17-C1_17-C4_17 | 110.2(5) |
| F7_14-C4_14-C1_14 | 106.5(7)  | O1_17-C1_17-C3_17 | 107.4(7) |
| C1_15-O1_15-AI17  | 150.5(4)  | C2_17-C1_17-C3_17 | 105.7(5) |
| O1_15-C1_15-C4_15 | 110.3(5)  | C4_17-C1_17-C3_17 | 108.2(6) |
| O1_15-C1_15-C3_15 | 107.8(5)  | F3_17-C2_17-F1_17 | 109.4(6) |
| C4_15-C1_15-C3_15 | 109.2(5)  | F3_17-C2_17-F2_17 | 105.0(6) |
| O1_15-C1_15-C2_15 | 111.1(5)  | F1_17-C2_17-F2_17 | 109.4(6) |
| C4_15-C1_15-C2_15 | 109.3(5)  | F3_17-C2_17-C1_17 | 111.6(5) |
| C3_15-C1_15-C2_15 | 108.9(5)  | F1_17-C2_17-C1_17 | 109.4(5) |
| F2_15-C2_15-F3_15 | 107.2(6)  | F2_17-C2_17-C1_17 | 111.9(6) |
| F2_15-C2_15-F1_15 | 108.1(6)  | F5_17-C3_17-F6_17 | 108.8(6) |
| F3_15-C2_15-F1_15 | 107.7(4)  | F5_17-C3_17-F4_17 | 106.7(7) |
| F2_15-C2_15-C1_15 | 112.5(5)  | F6_17-C3_17-F4_17 | 105.1(7) |
| F3_15-C2_15-C1_15 | 110.9(5)  | F5_17-C3_17-C1_17 | 113.1(6) |
| F1_15-C2_15-C1_15 | 110.3(5)  | F6_17-C3_17-C1_17 | 112.7(7) |
| F4_15-C3_15-F5_15 | 107.4(5)  | F4_17-C3_17-C1_17 | 109.9(6) |
| F4_15-C3_15-F6_15 | 107.4(5)  | F8_17-C4_17-F7_17 | 108.6(7) |
| F5_15-C3_15-F6_15 | 107.5(5)  | F8_17-C4_17-F9_17 | 105.6(6) |
| F4_15-C3_15-C1_15 | 111.1(5)  | F7_17-C4_17-F9_17 | 106.8(6) |
| F5_15-C3_15-C1_15 | 111.1(5)  | F8_17-C4_17-C1_17 | 116.2(6) |
| F6_15-C3_15-C1_15 | 112.1(5)  | F7_17-C4_17-C1_17 | 111.0(6) |
| F9_15-C4_15-F8_15 | 108.0(5)  | F9_17-C4_17-C1_17 | 108.2(6) |
| F9_15-C4_15-F7_15 | 107.1(6)  | F1_18-C1_18-C6_18 | 120.9(5) |
| F8_15-C4_15-F7_15 | 106.1(5)  | F1_18-C1_18-C2_18 | 118.3(5) |
| F9_15-C4_15-C1_15 | 111.2(5)  | C6_18-C1_18-C2_18 | 120.8(5) |
| F8_15-C4_15-C1_15 | 112.6(5)  | F2_18-C2_18-C3_18 | 120.5(5) |
| F7_15-C4_15-C1_15 | 111.6(5)  | F2_18-C2_18-C1_18 | 118.7(5) |
| C1_16-O1_16-AI18  | 145.8(12) | C3_18-C2_18-C1_18 | 120.7(5) |
| O1_16-C1_16-C3_16 | 108.4(9)  | C2_18-C3_18-C4_18 | 118.8(5) |
| O1_16-C1_16-C4_16 | 110.3(9)  | C2_18-C3_18-H3_18 | 120.6    |
| C3_16-C1_16-C4_16 | 108.4(6)  | C4_18-C3_18-H3_18 | 120.6    |
| O1_16-C1_16-C2_16 | 112.4(9)  | C5_18-C4_18-C3_18 | 119.8(5) |
| C3_16-C1_16-C2_16 | 110.7(6)  | C5_18-C4_18-H4_18 | 120.1    |
| C4_16-C1_16-C2_16 | 106.6(6)  | C3_18-C4_18-H4_18 | 120.1    |
| F3_16-C2_16-F2_16 | 106.8(7)  | C4_18-C5_18-C6_18 | 121.2(5) |
| F3_16-C2_16-F1_16 | 108.1(7)  | C4_18-C5_18-H5_18 | 119.4    |
| F2_16-C2_16-F1_16 | 111.7(7)  | C6_18-C5_18-H5_18 | 119.4    |
| F3_16-C2_16-C1_16 | 110.6(6)  | C1_18-C6_18-C5_18 | 118.6(5) |
| F2_16-C2_16-C1_16 | 111.7(6)  | C1_18-C6_18-H6_18 | 120.7    |
| F1_16-C2_16-C1_16 | 108.0(7)  | C5_18-C6_18-H6_18 | 120.7    |
| F4_16-C3_16-F6_16 | 106.7(7)  | C1_20-O1_20-AI17  | 147.0(4) |
| F4_16-C3_16-F5_16 | 107.9(7)  | O1_20-C1_20-C4_20 | 112.0(5) |
| F6_16-C3_16-F5_16 | 106.8(8)  | O1_20-C1_20-C3_20 | 107.2(5) |
| F4_16-C3_16-C1_16 | 112.3(6)  | C4_20-C1_20-C3_20 | 113.1(6) |
| F6_16-C3_16-C1_16 | 113.4(7)  | O1_20-C1_20-C2_20 | 111.2(6) |
| F5_16-C3_16-C1_16 | 109.4(7)  | C4_20-C1_20-C2_20 | 105.7(6) |
| F9_16-C4_16-F8_16 | 107.8(7)  | C3_20-C1_20-C2_20 | 107.6(6) |
| F9_16-C4_16-F7_16 | 105.6(7)  | F3_20-C2_20-F2_20 | 109.7(7) |
| F8_16-C4_16-F7_16 | 108.4(7)  | F3_20-C2_20-F1_20 | 108.8(8) |
| F9_16-C4_16-C1_16 | 112.2(6)  | F2_20-C2_20-F1_20 | 112.3(7) |
| F8_16-C4_16-C1_16 | 113.9(7)  | F3_20-C2_20-C1_20 | 111.5(6) |
| F7_16-C4_16-C1_16 | 108.6(7)  | F2_20-C2_20-C1_20 | 109.3(6) |
| C1_17-O1_17-AI18  | 153.3(9)  | F1_20-C2_20-C1_20 | 105.2(6) |
| O1_17-C1_17-C2_17 | 114.3(7)  | F4_20-C3_20-F6_20 | 107.0(7) |

|                   |           |                   |           |
|-------------------|-----------|-------------------|-----------|
| F4_20-C3_20-F5_20 | 109.8(7)  | F7_24-C4_24-F9_24 | 106.3(8)  |
| F6_20-C3_20-F5_20 | 109.7(6)  | F7_24-C4_24-F8_24 | 106.9(8)  |
| F4_20-C3_20-C1_20 | 112.0(6)  | F9_24-C4_24-F8_24 | 107.5(9)  |
| F6_20-C3_20-C1_20 | 111.9(6)  | F7_24-C4_24-C1_24 | 112.7(8)  |
| F5_20-C3_20-C1_20 | 106.5(6)  | F9_24-C4_24-C1_24 | 111.3(8)  |
| F9_20-C4_20-F8_20 | 111.1(6)  | F8_24-C4_24-C1_24 | 111.9(8)  |
| F9_20-C4_20-F7_20 | 102.0(7)  | C1_25-O1_25-AI17  | 145.5(7)  |
| F8_20-C4_20-F7_20 | 103.4(7)  | O1_25-C1_25-C3_25 | 113.2(8)  |
| F9_20-C4_20-C1_20 | 115.5(6)  | O1_25-C1_25-C4_25 | 110.7(8)  |
| F8_20-C4_20-C1_20 | 115.5(6)  | C3_25-C1_25-C4_25 | 109.0(8)  |
| F7_20-C4_20-C1_20 | 107.6(7)  | O1_25-C1_25-C2_25 | 106.9(8)  |
| C1_23-O1_23-AI16  | 146.7(7)  | C3_25-C1_25-C2_25 | 111.9(8)  |
| O1_23-C1_23-C3_23 | 110.6(8)  | C4_25-C1_25-C2_25 | 104.8(8)  |
| O1_23-C1_23-C2_23 | 110.2(8)  | F3_25-C2_25-F1_25 | 107.0(9)  |
| C3_23-C1_23-C2_23 | 108.2(8)  | F3_25-C2_25-F2_25 | 106.8(10) |
| O1_23-C1_23-C4_23 | 106.4(8)  | F1_25-C2_25-F2_25 | 106.5(9)  |
| C3_23-C1_23-C4_23 | 110.8(8)  | F3_25-C2_25-C1_25 | 112.6(8)  |
| C2_23-C1_23-C4_23 | 110.6(8)  | F1_25-C2_25-C1_25 | 112.2(8)  |
| F1_23-C2_23-F3_23 | 103.8(10) | F2_25-C2_25-C1_25 | 111.4(8)  |
| F1_23-C2_23-F2_23 | 105.1(11) | F6_25-C3_25-F5_25 | 97.2(11)  |
| F3_23-C2_23-F2_23 | 112.8(12) | F6_25-C3_25-F4_25 | 114.3(9)  |
| F1_23-C2_23-C1_23 | 110.7(9)  | F5_25-C3_25-F4_25 | 99.3(11)  |
| F3_23-C2_23-C1_23 | 113.0(9)  | F6_25-C3_25-C1_25 | 117.3(9)  |
| F2_23-C2_23-C1_23 | 111.1(10) | F5_25-C3_25-C1_25 | 117.7(10) |
| F5_23-C3_23-F6_23 | 110.8(13) | F4_25-C3_25-C1_25 | 109.5(8)  |
| F5_23-C3_23-F4_23 | 107.1(11) | F8_25-C4_25-F9_25 | 109.9(11) |
| F6_23-C3_23-F4_23 | 103.3(13) | F8_25-C4_25-F7_25 | 105.7(10) |
| F5_23-C3_23-C1_23 | 110.9(9)  | F9_25-C4_25-F7_25 | 107.5(11) |
| F6_23-C3_23-C1_23 | 111.8(11) | F8_25-C4_25-C1_25 | 113.7(9)  |
| F4_23-C3_23-C1_23 | 112.6(10) | F9_25-C4_25-C1_25 | 113.7(9)  |
| F9_23-C4_23-F8_23 | 106.2(12) | F7_25-C4_25-C1_25 | 105.8(8)  |
| F9_23-C4_23-F7_23 | 106.6(10) | C1_26-O1_26-AI19  | 153.7(10) |
| F8_23-C4_23-F7_23 | 107.5(12) | O1_26-C1_26-C2_26 | 116.8(9)  |
| F9_23-C4_23-C1_23 | 112.9(8)  | O1_26-C1_26-C3_26 | 110.8(8)  |
| F8_23-C4_23-C1_23 | 112.3(10) | C2_26-C1_26-C3_26 | 108.4(7)  |
| F7_23-C4_23-C1_23 | 111.0(9)  | O1_26-C1_26-C4_26 | 101.2(8)  |
| C1_24-O1_24-AI17  | 148.3(7)  | C2_26-C1_26-C4_26 | 110.7(7)  |
| O1_24-C1_24-C4_24 | 112.3(8)  | C3_26-C1_26-C4_26 | 108.6(7)  |
| O1_24-C1_24-C2_24 | 107.3(8)  | F3_26-C2_26-F2_26 | 106.4(9)  |
| C4_24-C1_24-C2_24 | 108.9(8)  | F3_26-C2_26-F1_26 | 105.5(11) |
| O1_24-C1_24-C3_24 | 110.2(8)  | F2_26-C2_26-F1_26 | 106.3(11) |
| C4_24-C1_24-C3_24 | 108.1(8)  | F3_26-C2_26-C1_26 | 116.0(8)  |
| C2_24-C1_24-C3_24 | 110.0(8)  | F2_26-C2_26-C1_26 | 112.6(8)  |
| F3_24-C2_24-F2_24 | 107.3(8)  | F1_26-C2_26-C1_26 | 109.4(8)  |
| F3_24-C2_24-F1_24 | 108.6(10) | F4_26-C3_26-F5_26 | 107.2(9)  |
| F2_24-C2_24-F1_24 | 107.5(9)  | F4_26-C3_26-F6_26 | 109.1(11) |
| F3_24-C2_24-C1_24 | 109.5(8)  | F5_26-C3_26-F6_26 | 110.0(9)  |
| F2_24-C2_24-C1_24 | 112.7(8)  | F4_26-C3_26-C1_26 | 108.7(8)  |
| F1_24-C2_24-C1_24 | 111.1(9)  | F5_26-C3_26-C1_26 | 110.6(7)  |
| F5_24-C3_24-F4_24 | 107.9(10) | F6_26-C3_26-C1_26 | 111.0(10) |
| F5_24-C3_24-F6_24 | 109.4(9)  | F8_26-C4_26-F7_26 | 105.9(10) |
| F4_24-C3_24-F6_24 | 107.1(8)  | F8_26-C4_26-F9_26 | 113.2(8)  |
| F5_24-C3_24-C1_24 | 108.7(9)  | F7_26-C4_26-F9_26 | 107.7(9)  |
| F4_24-C3_24-C1_24 | 110.9(8)  | F8_26-C4_26-C1_26 | 112.2(8)  |
| F6_24-C3_24-C1_24 | 112.8(8)  | F7_26-C4_26-C1_26 | 111.1(9)  |

|                   |           |                   |           |
|-------------------|-----------|-------------------|-----------|
| F9_26-C4_26-C1_26 | 106.8(9)  | O1_31-C1_31-C4_31 | 111.7(10) |
| C1_29-O1_29-AI16  | 146.6(8)  | C3_31-C1_31-C4_31 | 109.2(8)  |
| O1_29-C1_29-C3_29 | 119.1(8)  | C2_31-C1_31-C4_31 | 108.2(8)  |
| O1_29-C1_29-C4_29 | 111.5(9)  | F3_31-C2_31-F2_31 | 106.9(11) |
| C3_29-C1_29-C4_29 | 107.7(7)  | F3_31-C2_31-F1_31 | 105.7(13) |
| O1_29-C1_29-C2_29 | 100.7(8)  | F2_31-C2_31-F1_31 | 109.1(12) |
| C3_29-C1_29-C2_29 | 107.8(8)  | F3_31-C2_31-C1_31 | 113.0(9)  |
| C4_29-C1_29-C2_29 | 109.4(8)  | F2_31-C2_31-C1_31 | 113.2(9)  |
| F1_29-C2_29-F3_29 | 107.7(9)  | F1_31-C2_31-C1_31 | 108.6(11) |
| F1_29-C2_29-F2_29 | 108.2(9)  | F4_31-C3_31-F6_31 | 107.6(10) |
| F3_29-C2_29-F2_29 | 107.5(9)  | F4_31-C3_31-F5_31 | 111.1(12) |
| F1_29-C2_29-C1_29 | 109.5(8)  | F6_31-C3_31-F5_31 | 102.7(10) |
| F3_29-C2_29-C1_29 | 110.4(8)  | F4_31-C3_31-C1_31 | 111.0(9)  |
| F2_29-C2_29-C1_29 | 113.4(9)  | F6_31-C3_31-C1_31 | 115.3(9)  |
| F4_29-C3_29-F5_29 | 107.9(8)  | F5_31-C3_31-C1_31 | 108.8(9)  |
| F4_29-C3_29-F6_29 | 108.9(11) | F9_31-C4_31-F7_31 | 103.5(11) |
| F5_29-C3_29-F6_29 | 106.7(11) | F9_31-C4_31-F8_31 | 111.2(11) |
| F4_29-C3_29-C1_29 | 109.1(8)  | F7_31-C4_31-F8_31 | 106.3(10) |
| F5_29-C3_29-C1_29 | 112.5(7)  | F9_31-C4_31-C1_31 | 111.6(9)  |
| F6_29-C3_29-C1_29 | 111.7(11) | F7_31-C4_31-C1_31 | 110.5(10) |
| F7_29-C4_29-F8_29 | 108.5(10) | F8_31-C4_31-C1_31 | 113.1(9)  |
| F7_29-C4_29-F9_29 | 107.0(9)  | C1_33-O1_33-AI18  | 152.8(18) |
| F8_29-C4_29-F9_29 | 107.2(10) | O1_33-C1_33-C2_33 | 109.8(13) |
| F7_29-C4_29-C1_29 | 112.6(7)  | O1_33-C1_33-C3_33 | 108.8(12) |
| F8_29-C4_29-C1_29 | 113.6(9)  | C2_33-C1_33-C3_33 | 107.0(9)  |
| F9_29-C4_29-C1_29 | 107.7(8)  | O1_33-C1_33-C4_33 | 110.9(13) |
| C1_30-O1_30-AI17  | 150.6(8)  | C2_33-C1_33-C4_33 | 110.0(9)  |
| O1_30-C1_30-C2_30 | 109.3(8)  | C3_33-C1_33-C4_33 | 110.3(9)  |
| O1_30-C1_30-C4_30 | 108.5(8)  | F2_33-C2_33-F3_33 | 107.8(11) |
| C2_30-C1_30-C4_30 | 108.9(8)  | F2_33-C2_33-F1_33 | 105.0(11) |
| O1_30-C1_30-C3_30 | 109.3(8)  | F3_33-C2_33-F1_33 | 113.6(12) |
| C2_30-C1_30-C3_30 | 110.2(8)  | F2_33-C2_33-C1_33 | 115.9(10) |
| C4_30-C1_30-C3_30 | 110.6(9)  | F3_33-C2_33-C1_33 | 109.9(9)  |
| F3_30-C2_30-F1_30 | 107.1(10) | F1_33-C2_33-C1_33 | 104.7(10) |
| F3_30-C2_30-F2_30 | 97.0(10)  | F4_33-C3_33-F6_33 | 106.2(11) |
| F1_30-C2_30-F2_30 | 111.0(10) | F4_33-C3_33-F5_33 | 112.8(12) |
| F3_30-C2_30-C1_30 | 110.6(9)  | F6_33-C3_33-F5_33 | 107.5(12) |
| F1_30-C2_30-C1_30 | 116.7(10) | F4_33-C3_33-C1_33 | 111.1(9)  |
| F2_30-C2_30-C1_30 | 112.5(9)  | F6_33-C3_33-C1_33 | 111.8(10) |
| F6_30-C3_30-F5_30 | 101.6(10) | F5_33-C3_33-C1_33 | 107.3(10) |
| F6_30-C3_30-F4_30 | 112.8(11) | F7_33-C4_33-F8_33 | 106.7(11) |
| F5_30-C3_30-F4_30 | 106.9(10) | F7_33-C4_33-F9_33 | 110.0(12) |
| F6_30-C3_30-C1_30 | 111.4(9)  | F8_33-C4_33-F9_33 | 114.1(12) |
| F5_30-C3_30-C1_30 | 113.7(9)  | F7_33-C4_33-C1_33 | 106.3(10) |
| F4_30-C3_30-C1_30 | 110.1(8)  | F8_33-C4_33-C1_33 | 109.0(10) |
| F9_30-C4_30-F7_30 | 106.1(11) | F9_33-C4_33-C1_33 | 110.3(9)  |
| F9_30-C4_30-F8_30 | 106.0(11) | C1_34-O1_34-AI20  | 156.9(9)  |
| F7_30-C4_30-F8_30 | 112.2(11) | O1_34-C1_34-C4_34 | 115.8(10) |
| F9_30-C4_30-C1_30 | 111.1(10) | O1_34-C1_34-C3_34 | 109.7(9)  |
| F7_30-C4_30-C1_30 | 113.1(9)  | C4_34-C1_34-C3_34 | 107.5(9)  |
| F8_30-C4_30-C1_30 | 108.1(9)  | O1_34-C1_34-C2_34 | 105.1(9)  |
| C1_31-O1_31-AI17  | 154.2(12) | C4_34-C1_34-C2_34 | 100.8(8)  |
| O1_31-C1_31-C3_31 | 110.6(12) | C3_34-C1_34-C2_34 | 117.9(9)  |
| O1_31-C1_31-C2_31 | 107.4(10) | F3_34-C2_34-F2_34 | 110.5(12) |
| C3_31-C1_31-C2_31 | 109.7(8)  | F3_34-C2_34-F1_34 | 114.9(11) |

|                   |           |                   |           |
|-------------------|-----------|-------------------|-----------|
| F2_34-C2_34-F1_34 | 103.2(10) | F6_27-C3_27-F5_27 | 107.7(10) |
| F3_34-C2_34-C1_34 | 114.1(10) | F4_27-C3_27-F5_27 | 103.2(10) |
| F2_34-C2_34-C1_34 | 105.0(10) | F6_27-C3_27-C1_27 | 118.1(9)  |
| F1_34-C2_34-C1_34 | 108.2(10) | F4_27-C3_27-C1_27 | 113.7(9)  |
| F6_34-C3_34-F5_34 | 107.9(11) | F5_27-C3_27-C1_27 | 108.6(8)  |
| F6_34-C3_34-F4_34 | 104.1(12) | F9_27-C4_27-F8_27 | 109.3(11) |
| F5_34-C3_34-F4_34 | 102.0(11) | F9_27-C4_27-F7_27 | 108.2(11) |
| F6_34-C3_34-C1_34 | 115.8(10) | F8_27-C4_27-F7_27 | 103.0(9)  |
| F5_34-C3_34-C1_34 | 111.3(9)  | F9_27-C4_27-C1_27 | 112.9(9)  |
| F4_34-C3_34-C1_34 | 114.7(11) | F8_27-C4_27-C1_27 | 110.6(9)  |
| F9_34-C4_34-F8_34 | 106.3(11) | F7_27-C4_27-C1_27 | 112.4(9)  |
| F9_34-C4_34-F7_34 | 101.8(11) | C1_36-O1_36-AI20  | 149.4(10) |
| F8_34-C4_34-F7_34 | 107.9(10) | O1_36-C1_36-C3_36 | 108.5(9)  |
| F9_34-C4_34-C1_34 | 119.3(11) | O1_36-C1_36-C2_36 | 114.2(9)  |
| F8_34-C4_34-C1_34 | 112.8(9)  | C3_36-C1_36-C2_36 | 109.2(8)  |
| F7_34-C4_34-C1_34 | 107.8(9)  | O1_36-C1_36-C4_36 | 108.2(8)  |
| C1_35-O1_35-AI20  | 150(2)    | C3_36-C1_36-C4_36 | 108.8(8)  |
| O1_35-C1_35-C3_35 | 110.2(14) | C2_36-C1_36-C4_36 | 107.8(8)  |
| O1_35-C1_35-C4_35 | 108.1(15) | F2_36-C2_36-F3_36 | 107.9(9)  |
| C3_35-C1_35-C4_35 | 108.7(11) | F2_36-C2_36-F1_36 | 109.4(10) |
| O1_35-C1_35-C2_35 | 109.3(13) | F3_36-C2_36-F1_36 | 106.3(9)  |
| C3_35-C1_35-C2_35 | 110.1(11) | F2_36-C2_36-C1_36 | 112.8(10) |
| C4_35-C1_35-C2_35 | 110.3(11) | F3_36-C2_36-C1_36 | 109.0(9)  |
| F3_35-C2_35-F1_35 | 105.9(17) | F1_36-C2_36-C1_36 | 111.2(8)  |
| F3_35-C2_35-F2_35 | 108.7(17) | F5_36-C3_36-F4_36 | 105.1(11) |
| F1_35-C2_35-F2_35 | 107.2(18) | F5_36-C3_36-F6_36 | 110.6(13) |
| F3_35-C2_35-C1_35 | 110.1(12) | F4_36-C3_36-F6_36 | 106.8(14) |
| F1_35-C2_35-C1_35 | 111.6(13) | F5_36-C3_36-C1_36 | 110.0(9)  |
| F2_35-C2_35-C1_35 | 113.0(16) | F4_36-C3_36-C1_36 | 111.8(10) |
| F5_35-C3_35-F4_35 | 107.3(15) | F6_36-C3_36-C1_36 | 112.2(13) |
| F5_35-C3_35-F6_35 | 107.1(15) | F7_36-C4_36-F8_36 | 107.1(9)  |
| F4_35-C3_35-F6_35 | 106.6(15) | F7_36-C4_36-F9_36 | 104.6(9)  |
| F5_35-C3_35-C1_35 | 111.1(12) | F8_36-C4_36-F9_36 | 107.5(9)  |
| F4_35-C3_35-C1_35 | 111.8(13) | F7_36-C4_36-C1_36 | 112.3(9)  |
| F6_35-C3_35-C1_35 | 112.6(13) | F8_36-C4_36-C1_36 | 113.7(9)  |
| F9_35-C4_35-F8_35 | 107.2(14) | F9_36-C4_36-C1_36 | 111.1(8)  |
| F9_35-C4_35-F7_35 | 108.1(15) | C1_37-O1_37-AI20  | 152.2(10) |
| F8_35-C4_35-F7_35 | 107.6(14) | O1_37-C1_37-C2_37 | 108.7(10) |
| F9_35-C4_35-C1_35 | 111.2(12) | O1_37-C1_37-C4_37 | 111.1(11) |
| F8_35-C4_35-C1_35 | 111.9(12) | C2_37-C1_37-C4_37 | 108.2(10) |
| F7_35-C4_35-C1_35 | 110.7(13) | O1_37-C1_37-C3_37 | 108.6(11) |
| C1_27-O1_27-AI18  | 154.6(8)  | C2_37-C1_37-C3_37 | 109.9(10) |
| O1_27-C1_27-C2_27 | 108.7(8)  | C4_37-C1_37-C3_37 | 110.2(10) |
| O1_27-C1_27-C4_27 | 114.3(8)  | F1_37-C2_37-F3_37 | 112.9(13) |
| C2_27-C1_27-C4_27 | 107.5(7)  | F1_37-C2_37-F2_37 | 109.7(12) |
| O1_27-C1_27-C3_27 | 107.0(8)  | F3_37-C2_37-F2_37 | 105.6(13) |
| C2_27-C1_27-C3_27 | 112.4(8)  | F1_37-C2_37-C1_37 | 109.5(10) |
| C4_27-C1_27-C3_27 | 107.1(7)  | F3_37-C2_37-C1_37 | 110.2(11) |
| F3_27-C2_27-F2_27 | 98.4(10)  | F2_37-C2_37-C1_37 | 108.7(11) |
| F3_27-C2_27-F1_27 | 105.4(9)  | F5_37-C3_37-F4_37 | 115.0(14) |
| F2_27-C2_27-F1_27 | 106.1(10) | F5_37-C3_37-F6_37 | 109.1(15) |
| F3_27-C2_27-C1_27 | 114.5(9)  | F4_37-C3_37-F6_37 | 103.4(13) |
| F2_27-C2_27-C1_27 | 114.4(9)  | F5_37-C3_37-C1_37 | 109.7(12) |
| F1_27-C2_27-C1_27 | 116.2(8)  | F4_37-C3_37-C1_37 | 109.6(11) |
| F6_27-C3_27-F4_27 | 104.3(9)  | F6_37-C3_37-C1_37 | 109.8(12) |

|                   |           |                   |           |
|-------------------|-----------|-------------------|-----------|
| F8_37-C4_37-F9_37 | 109.5(12) | F7_42-C4_42-C1_42 | 106.9(13) |
| F8_37-C4_37-F7_37 | 110.6(13) | C1_43-O1_43-AI19  | 144.0(7)  |
| F9_37-C4_37-F7_37 | 107.1(13) | O1_43-C1_43-C4_43 | 119.9(9)  |
| F8_37-C4_37-C1_37 | 111.2(11) | O1_43-C1_43-C2_43 | 105.3(7)  |
| F9_37-C4_37-C1_37 | 108.1(11) | C4_43-C1_43-C2_43 | 108.7(8)  |
| F7_37-C4_37-C1_37 | 110.1(10) | O1_43-C1_43-C3_43 | 101.4(7)  |
| C1_41-O1_41-AI18  | 153.6(13) | C4_43-C1_43-C3_43 | 110.1(7)  |
| O1_41-C1_41-C2_41 | 113.8(11) | C2_43-C1_43-C3_43 | 111.1(8)  |
| O1_41-C1_41-C3_41 | 111.4(11) | F3_43-C2_43-F2_43 | 109.7(9)  |
| C2_41-C1_41-C3_41 | 112.4(10) | F3_43-C2_43-F1_43 | 104.4(9)  |
| O1_41-C1_41-C4_41 | 103.3(10) | F2_43-C2_43-F1_43 | 107.2(8)  |
| C2_41-C1_41-C4_41 | 106.2(9)  | F3_43-C2_43-C1_43 | 112.1(8)  |
| C3_41-C1_41-C4_41 | 109.1(10) | F2_43-C2_43-C1_43 | 111.2(9)  |
| F2_41-C2_41-F3_41 | 111.0(12) | F1_43-C2_43-C1_43 | 111.9(9)  |
| F2_41-C2_41-F1_41 | 107.2(12) | F6_43-C3_43-F4_43 | 110.4(8)  |
| F3_41-C2_41-F1_41 | 106.0(12) | F6_43-C3_43-F5_43 | 127.0(10) |
| F2_41-C2_41-C1_41 | 112.3(11) | F4_43-C3_43-F5_43 | 97.5(7)   |
| F3_41-C2_41-C1_41 | 109.4(10) | F6_43-C3_43-C1_43 | 111.9(7)  |
| F1_41-C2_41-C1_41 | 110.7(11) | F4_43-C3_43-C1_43 | 110.8(8)  |
| F5_41-C3_41-F4_41 | 105.3(12) | F5_43-C3_43-C1_43 | 97.8(7)   |
| F5_41-C3_41-F6_41 | 107.8(14) | F9_43-C4_43-F8_43 | 102.1(10) |
| F4_41-C3_41-F6_41 | 111.7(14) | F9_43-C4_43-F7_43 | 108.2(10) |
| F5_41-C3_41-C1_41 | 114.2(12) | F8_43-C4_43-F7_43 | 104.4(9)  |
| F4_41-C3_41-C1_41 | 109.6(11) | F9_43-C4_43-C1_43 | 118.5(9)  |
| F6_41-C3_41-C1_41 | 108.2(12) | F8_43-C4_43-C1_43 | 111.1(10) |
| F7_41-C4_41-F8_41 | 112.8(13) | F7_43-C4_43-C1_43 | 111.3(8)  |
| F7_41-C4_41-F9_41 | 103.8(12) | C1_44-O1_44-AI16  | 154.8(7)  |
| F8_41-C4_41-F9_41 | 107.9(11) | O1_44-C1_44-C2_44 | 106.2(8)  |
| F7_41-C4_41-C1_41 | 107.8(11) | O1_44-C1_44-C3_44 | 113.1(8)  |
| F8_41-C4_41-C1_41 | 113.9(11) | C2_44-C1_44-C3_44 | 111.0(7)  |
| F9_41-C4_41-C1_41 | 110.2(11) | O1_44-C1_44-C4_44 | 110.7(8)  |
| C1_42-O1_42-AI19  | 154(2)    | C2_44-C1_44-C4_44 | 106.2(8)  |
| O1_42-C1_42-C4_42 | 109.8(14) | C3_44-C1_44-C4_44 | 109.3(8)  |
| O1_42-C1_42-C3_42 | 112.0(14) | F2_44-C2_44-F3_44 | 101.0(10) |
| C4_42-C1_42-C3_42 | 116.1(11) | F2_44-C2_44-F1_44 | 112.0(10) |
| O1_42-C1_42-C2_42 | 101.7(13) | F3_44-C2_44-F1_44 | 109.9(10) |
| C4_42-C1_42-C2_42 | 107.4(11) | F2_44-C2_44-C1_44 | 113.1(10) |
| C3_42-C1_42-C2_42 | 108.7(11) | F3_44-C2_44-C1_44 | 108.8(8)  |
| F1_42-C2_42-F2_42 | 112.6(16) | F1_44-C2_44-C1_44 | 111.6(8)  |
| F1_42-C2_42-F3_42 | 104.8(15) | F4_44-C3_44-F6_44 | 112.8(10) |
| F2_42-C2_42-F3_42 | 108.8(15) | F4_44-C3_44-F5_44 | 106.6(10) |
| F1_42-C2_42-C1_42 | 114.4(14) | F6_44-C3_44-F5_44 | 107.2(10) |
| F2_42-C2_42-C1_42 | 111.2(14) | F4_44-C3_44-C1_44 | 109.9(8)  |
| F3_42-C2_42-C1_42 | 104.3(13) | F6_44-C3_44-C1_44 | 110.1(9)  |
| F4_42-C3_42-F6_42 | 107.7(15) | F5_44-C3_44-C1_44 | 110.1(10) |
| F4_42-C3_42-F5_42 | 105.3(15) | F8_44-C4_44-F9_44 | 107.9(12) |
| F6_42-C3_42-F5_42 | 108.4(16) | F8_44-C4_44-F7_44 | 109.4(12) |
| F4_42-C3_42-C1_42 | 117.2(15) | F9_44-C4_44-F7_44 | 105.7(11) |
| F6_42-C3_42-C1_42 | 109.0(13) | F8_44-C4_44-C1_44 | 111.4(10) |
| F5_42-C3_42-C1_42 | 108.9(14) | F9_44-C4_44-C1_44 | 111.2(10) |
| F9_42-C4_42-F8_42 | 110.8(16) | F7_44-C4_44-C1_44 | 111.2(10) |
| F9_42-C4_42-F7_42 | 110.0(16) | C1_46-O1_46-AI19  | 150.7(7)  |
| F8_42-C4_42-F7_42 | 104.9(16) | O1_46-C1_46-C2_46 | 112.3(9)  |
| F9_42-C4_42-C1_42 | 116.2(14) | O1_46-C1_46-C4_46 | 107.9(8)  |
| F8_42-C4_42-C1_42 | 107.3(14) | C2_46-C1_46-C4_46 | 109.2(9)  |



|                   |           |                   |           |
|-------------------|-----------|-------------------|-----------|
| O1_46-C1_46-C3_46 | 108.2(8)  | F1_62-C2_62-F2_62 | 90.8(14)  |
| C2_46-C1_46-C3_46 | 109.3(8)  | F3_62-C2_62-C1_62 | 117.1(12) |
| C4_46-C1_46-C3_46 | 109.9(8)  | F1_62-C2_62-C1_62 | 115.4(14) |
| F2_46-C2_46-F1_46 | 107.8(12) | F2_62-C2_62-C1_62 | 99.0(13)  |
| F2_46-C2_46-F3_46 | 106.4(12) | F6_62-C3_62-F5_62 | 122.5(17) |
| F1_46-C2_46-F3_46 | 106.4(11) | F6_62-C3_62-F4_62 | 108.8(15) |
| F2_46-C2_46-C1_46 | 115.0(12) | F5_62-C3_62-F4_62 | 90.8(13)  |
| F1_46-C2_46-C1_46 | 110.5(10) | F6_62-C3_62-C1_62 | 109.3(12) |
| F3_46-C2_46-C1_46 | 110.4(10) | F5_62-C3_62-C1_62 | 108.6(12) |
| F5_46-C3_46-F4_46 | 107.7(9)  | F4_62-C3_62-C1_62 | 116.2(14) |
| F5_46-C3_46-F6_46 | 108.4(9)  | F7_62-C4_62-F8_62 | 110.7(14) |
| F4_46-C3_46-F6_46 | 106.5(9)  | F7_62-C4_62-F9_62 | 106.7(15) |
| F5_46-C3_46-C1_46 | 111.8(9)  | F8_62-C4_62-F9_62 | 110.0(14) |
| F4_46-C3_46-C1_46 | 111.8(8)  | F7_62-C4_62-C1_62 | 108.4(13) |
| F6_46-C3_46-C1_46 | 110.4(9)  | F8_62-C4_62-C1_62 | 114.4(13) |
| F7_46-C4_46-F8_46 | 105.9(11) | F9_62-C4_62-C1_62 | 106.3(12) |
| F7_46-C4_46-F9_46 | 108.4(12) | C1_63-O1_63-AI18  | 148(3)    |
| F8_46-C4_46-F9_46 | 109.2(10) | O1_63-C1_63-C4_63 | 111.9(17) |
| F7_46-C4_46-C1_46 | 109.4(10) | O1_63-C1_63-C3_63 | 113.8(19) |
| F8_46-C4_46-C1_46 | 112.6(9)  | C4_63-C1_63-C3_63 | 108.4(11) |
| F9_46-C4_46-C1_46 | 111.2(9)  | O1_63-C1_63-C2_63 | 109.5(17) |
| C1_61-O1_61-AI20  | 147.2(11) | C4_63-C1_63-C2_63 | 114.6(11) |
| O1_61-C1_61-C4_61 | 112.2(11) | C3_63-C1_63-C2_63 | 98.0(10)  |
| O1_61-C1_61-C3_61 | 107.1(10) | F2_63-C2_63-F3_63 | 109.1(15) |
| C4_61-C1_61-C3_61 | 109.8(10) | F2_63-C2_63-F1_63 | 111.5(15) |
| O1_61-C1_61-C2_61 | 109.7(10) | F3_63-C2_63-F1_63 | 106.4(15) |
| C4_61-C1_61-C2_61 | 108.4(10) | F2_63-C2_63-C1_63 | 110.6(13) |
| C3_61-C1_61-C2_61 | 109.6(10) | F3_63-C2_63-C1_63 | 110.5(13) |
| F3_61-C2_61-F2_61 | 106.4(13) | F1_63-C2_63-C1_63 | 108.7(12) |
| F3_61-C2_61-F1_61 | 106.5(13) | F4_63-C3_63-F5_63 | 106.4(15) |
| F2_61-C2_61-F1_61 | 108.5(12) | F4_63-C3_63-F6_63 | 125.6(16) |
| F3_61-C2_61-C1_61 | 111.0(11) | F5_63-C3_63-F6_63 | 96.6(14)  |
| F2_61-C2_61-C1_61 | 112.2(11) | F4_63-C3_63-C1_63 | 106.0(11) |
| F1_61-C2_61-C1_61 | 112.0(11) | F5_63-C3_63-C1_63 | 116.5(14) |
| F6_61-C3_61-F5_61 | 107.8(13) | F6_63-C3_63-C1_63 | 106.3(12) |
| F6_61-C3_61-F4_61 | 108.4(13) | F8_63-C4_63-F9_63 | 98.5(13)  |
| F5_61-C3_61-F4_61 | 106.3(13) | F8_63-C4_63-F7_63 | 111.7(17) |
| F6_61-C3_61-C1_61 | 111.3(11) | F9_63-C4_63-F7_63 | 104.3(14) |
| F5_61-C3_61-C1_61 | 111.0(12) | F8_63-C4_63-C1_63 | 110.9(15) |
| F4_61-C3_61-C1_61 | 111.8(11) | F9_63-C4_63-C1_63 | 118.7(14) |
| F9_61-C4_61-F8_61 | 109.6(13) | F7_63-C4_63-C1_63 | 112.0(13) |
| F9_61-C4_61-F7_61 | 105.1(15) | C1_64-O1_64-AI17  | 147.8(18) |
| F8_61-C4_61-F7_61 | 104.8(14) | O1_64-C1_64-C2_64 | 112.1(13) |
| F9_61-C4_61-C1_61 | 112.2(12) | O1_64-C1_64-C3_64 | 125.8(14) |
| F8_61-C4_61-C1_61 | 113.2(12) | C2_64-C1_64-C3_64 | 110.0(10) |
| F7_61-C4_61-C1_61 | 111.3(12) | O1_64-C1_64-C4_64 | 94.0(12)  |
| C1_62-O1_62-AI20  | 143(2)    | C2_64-C1_64-C4_64 | 114.2(11) |
| O1_62-C1_62-C4_62 | 111.5(15) | C3_64-C1_64-C4_64 | 98.5(10)  |
| O1_62-C1_62-C2_62 | 119.4(15) | F3_64-C2_64-F2_64 | 108.2(16) |
| C4_62-C1_62-C2_62 | 106.9(11) | F3_64-C2_64-F1_64 | 111.6(13) |
| O1_62-C1_62-C3_62 | 109.1(14) | F2_64-C2_64-F1_64 | 104.8(16) |
| C4_62-C1_62-C3_62 | 107.0(11) | F3_64-C2_64-C1_64 | 113.9(11) |
| C2_62-C1_62-C3_62 | 102.0(11) | F2_64-C2_64-C1_64 | 111.1(15) |
| F3_62-C2_62-F1_62 | 126.6(15) | F1_64-C2_64-C1_64 | 106.7(10) |
| F3_62-C2_62-F2_62 | 90.3(14)  | F4_64-C3_64-F5_64 | 106.9(16) |

|                   |           |                   |           |
|-------------------|-----------|-------------------|-----------|
| F4_64-C3_64-F6_64 | 119.3(15) | O1_67-C1_67-C2_67 | 113.9(16) |
| F5_64-C3_64-F6_64 | 104.1(16) | O1_67-C1_67-C4_67 | 112.3(14) |
| F4_64-C3_64-C1_64 | 111.8(11) | C2_67-C1_67-C4_67 | 110.4(12) |
| F5_64-C3_64-C1_64 | 112.8(16) | O1_67-C1_67-C3_67 | 102.7(15) |
| F6_64-C3_64-C1_64 | 101.9(12) | C2_67-C1_67-C3_67 | 108.2(12) |
| F8_64-C4_64-F7_64 | 115.3(14) | C4_67-C1_67-C3_67 | 108.9(13) |
| F8_64-C4_64-F9_64 | 110.4(15) | F3_67-C2_67-F1_67 | 111.8(18) |
| F7_64-C4_64-F9_64 | 102.4(14) | F3_67-C2_67-F2_67 | 108.1(17) |
| F8_64-C4_64-C1_64 | 113.8(13) | F1_67-C2_67-F2_67 | 105.3(17) |
| F7_64-C4_64-C1_64 | 106.1(11) | F3_67-C2_67-C1_67 | 111.2(14) |
| F9_64-C4_64-C1_64 | 108.0(13) | F1_67-C2_67-C1_67 | 110.6(15) |
| C1_65-O1_65-AI18  | 146(2)    | F2_67-C2_67-C1_67 | 109.6(15) |
| O1_65-C1_65-C3_65 | 110.8(14) | F6_67-C3_67-F5_67 | 108.2(17) |
| O1_65-C1_65-C2_65 | 111.7(16) | F6_67-C3_67-F4_67 | 114.2(19) |
| C3_65-C1_65-C2_65 | 112.9(11) | F5_67-C3_67-F4_67 | 106.4(17) |
| O1_65-C1_65-C4_65 | 107.7(14) | F6_67-C3_67-C1_67 | 112.1(17) |
| C3_65-C1_65-C4_65 | 108.1(11) | F5_67-C3_67-C1_67 | 111.2(15) |
| C2_65-C1_65-C4_65 | 105.3(10) | F4_67-C3_67-C1_67 | 104.5(14) |
| F2_65-C2_65-F3_65 | 115.9(17) | F9_67-C4_67-F7_67 | 107.7(18) |
| F2_65-C2_65-F1_65 | 99.3(15)  | F9_67-C4_67-F8_67 | 107.7(18) |
| F3_65-C2_65-F1_65 | 106.7(17) | F7_67-C4_67-F8_67 | 105.7(17) |
| F2_65-C2_65-C1_65 | 109.1(14) | F9_67-C4_67-C1_67 | 110.9(15) |
| F3_65-C2_65-C1_65 | 113.0(16) | F7_67-C4_67-C1_67 | 114.4(15) |
| F1_65-C2_65-C1_65 | 112.0(15) | F8_67-C4_67-C1_67 | 110.1(15) |
| F5_65-C3_65-F6_65 | 104.8(16) | C1_38-O1_38-AI18  | 160.7(15) |
| F5_65-C3_65-F4_65 | 114.7(16) | O1_38-C1_38-C2_38 | 106.7(11) |
| F6_65-C3_65-F4_65 | 108.3(17) | O1_38-C1_38-C4_38 | 103.0(11) |
| F5_65-C3_65-C1_65 | 108.9(13) | C2_38-C1_38-C4_38 | 107.2(9)  |
| F6_65-C3_65-C1_65 | 112.9(15) | O1_38-C1_38-C3_38 | 100.5(11) |
| F4_65-C3_65-C1_65 | 107.3(12) | C2_38-C1_38-C3_38 | 127.1(11) |
| F7_65-C4_65-F8_65 | 115.9(16) | C4_38-C1_38-C3_38 | 109.6(10) |
| F7_65-C4_65-F9_65 | 106.6(14) | F2_38-C2_38-F1_38 | 97.5(12)  |
| F8_65-C4_65-F9_65 | 104.0(15) | F2_38-C2_38-F3_38 | 112.9(13) |
| F7_65-C4_65-C1_65 | 111.4(13) | F1_38-C2_38-F3_38 | 96.4(12)  |
| F8_65-C4_65-C1_65 | 111.1(13) | F2_38-C2_38-C1_38 | 118.1(12) |
| F9_65-C4_65-C1_65 | 107.2(11) | F1_38-C2_38-C1_38 | 112.3(11) |
| C6_19-C1_19-F1_19 | 121.7(9)  | F3_38-C2_38-C1_38 | 115.7(11) |
| C6_19-C1_19-C2_19 | 118.5(9)  | F6_38-C3_38-F5_38 | 105.4(14) |
| F1_19-C1_19-C2_19 | 119.8(8)  | F6_38-C3_38-F4_38 | 99.2(12)  |
| F2_19-C2_19-C3_19 | 122.8(9)  | F5_38-C3_38-F4_38 | 102.3(13) |
| F2_19-C2_19-C1_19 | 116.8(9)  | F6_38-C3_38-C1_38 | 118.0(12) |
| C3_19-C2_19-C1_19 | 120.4(9)  | F5_38-C3_38-C1_38 | 104.9(12) |
| C4_19-C3_19-C2_19 | 120.0(9)  | F4_38-C3_38-C1_38 | 124.7(12) |
| C4_19-C3_19-H3_19 | 120.0     | F8_38-C4_38-F7_38 | 107.5(13) |
| C2_19-C3_19-H3_19 | 120.0     | F8_38-C4_38-F9_38 | 102.2(12) |
| C3_19-C4_19-C5_19 | 118.8(9)  | F7_38-C4_38-F9_38 | 110.1(14) |
| C3_19-C4_19-H4_19 | 120.6     | F8_38-C4_38-C1_38 | 114.8(12) |
| C5_19-C4_19-H4_19 | 120.6     | F7_38-C4_38-C1_38 | 108.9(11) |
| C6_19-C5_19-C4_19 | 120.9(9)  | F9_38-C4_38-C1_38 | 113.1(11) |
| C6_19-C5_19-H5_19 | 119.6     | C1_21-O1_21-AI18  | 146.5(11) |
| C4_19-C5_19-H5_19 | 119.6     | O1_21-C1_21-C3_21 | 111.6(7)  |
| C1_19-C6_19-C5_19 | 121.4(9)  | O1_21-C1_21-C4_21 | 110.6(8)  |
| C1_19-C6_19-H6_19 | 119.3     | C3_21-C1_21-C4_21 | 109.4(6)  |
| C5_19-C6_19-H6_19 | 119.3     | O1_21-C1_21-C2_21 | 105.2(8)  |
| C1_67-O1_67-AI16  | 156(2)    | C3_21-C1_21-C2_21 | 110.1(6)  |

|                   |           |                |            |
|-------------------|-----------|----------------|------------|
| C4_21-C1_21-C2_21 | 109.8(6)  | C5B_45-AI2_45- | 37.05(11)  |
| F2_21-C2_21-F3_21 | 109.5(9)  | C4B_45         |            |
| F2_21-C2_21-F1_21 | 107.0(8)  | C1B_45-AI2_45- | 37.05(14)  |
| F3_21-C2_21-F1_21 | 106.6(9)  | C2B_45         |            |
| F2_21-C2_21-C1_21 | 111.6(7)  | C5B_45-AI2_45- | 61.76(13)  |
| F3_21-C2_21-C1_21 | 111.4(8)  | C2B_45         |            |
| F1_21-C2_21-C1_21 | 110.4(7)  | C4B_45-AI2_45- | 61.40(12)  |
| F5_21-C3_21-F4_21 | 106.9(7)  | C2B_45         |            |
| F5_21-C3_21-F6_21 | 108.0(7)  | C1B_45-AI2_45- | 61.85(13)  |
| F4_21-C3_21-F6_21 | 106.5(7)  | C3B_45         |            |
| F5_21-C3_21-C1_21 | 111.1(7)  | C5B_45-AI2_45- | 61.83(12)  |
| F4_21-C3_21-C1_21 | 111.4(6)  | C3B_45         |            |
| F6_21-C3_21-C1_21 | 112.7(6)  | C4B_45-AI2_45- | 36.85(11)  |
| F9_21-C4_21-F7_21 | 108.5(8)  | C3B_45         |            |
| F9_21-C4_21-F8_21 | 106.9(8)  | C2B_45-AI2_45- | 36.73(13)  |
| F7_21-C4_21-F8_21 | 107.4(7)  | C3B_45         |            |
| F9_21-C4_21-C1_21 | 111.6(7)  | C1B_45-AI2_45- | 149.94(12) |
| F7_21-C4_21-C1_21 | 111.8(7)  | ln1_45         |            |
| F8_21-C4_21-C1_21 | 110.4(7)  | C5B_45-AI2_45- | 171.83(11) |
| C1_28-O1_28-AI18  | 149(2)    | ln1_45         |            |
| O1_28-C1_28-C4_28 | 115.7(13) | C4B_45-AI2_45- | 136.19(10) |
| O1_28-C1_28-C2_28 | 107.4(14) | ln1_45         |            |
| C4_28-C1_28-C2_28 | 110.1(9)  | C2B_45-AI2_45- | 121.56(11) |
| O1_28-C1_28-C3_28 | 106.5(14) | ln1_45         |            |
| C4_28-C1_28-C3_28 | 108.6(9)  | C3B_45-AI2_45- | 115.65(10) |
| C2_28-C1_28-C3_28 | 108.1(9)  | ln1_45         |            |
| F1_28-C2_28-F3_28 | 107.7(12) | C1C_45-AI3_45- | 37.47(12)  |
| F1_28-C2_28-F2_28 | 108.5(12) | C5C_45         |            |
| F3_28-C2_28-F2_28 | 109.5(11) | C1C_45-AI3_45- | 37.17(11)  |
| F1_28-C2_28-C1_28 | 108.7(11) | C2C_45         |            |
| F3_28-C2_28-C1_28 | 111.4(10) | C5C_45-AI3_45- | 61.78(12)  |
| F2_28-C2_28-C1_28 | 111.1(10) | C2C_45         |            |
| F5_28-C3_28-F6_28 | 109.5(12) | C1C_45-AI3_45- | 62.24(13)  |
| F5_28-C3_28-F4_28 | 105.3(14) | C4C_45         |            |
| F6_28-C3_28-F4_28 | 109.8(13) | C5C_45-AI3_45- | 37.33(14)  |
| F5_28-C3_28-C1_28 | 111.4(10) | C4C_45         |            |
| F6_28-C3_28-C1_28 | 112.5(11) | C2C_45-AI3_45- | 61.14(13)  |
| F4_28-C3_28-C1_28 | 108.1(13) | C4C_45         |            |
| F7_28-C4_28-F9_28 | 109.7(11) | C1C_45-AI3_45- | 61.97(12)  |
| F7_28-C4_28-F8_28 | 105.6(11) | C3C_45         |            |
| F9_28-C4_28-F8_28 | 107.2(11) | C5C_45-AI3_45- | 61.82(14)  |
| F7_28-C4_28-C1_28 | 111.8(10) | C3C_45         |            |
| F9_28-C4_28-C1_28 | 109.4(9)  | C2C_45-AI3_45- | 36.50(13)  |
| F8_28-C4_28-C1_28 | 112.9(10) | C3C_45         |            |
| AI3_45-ln1_45-    |           | C4C_45-AI3_45- | 36.56(14)  |
| AI1_45            | 66.24(4)  | C3C_45         |            |
| AI3_45-ln1_45-    |           | C1C_45-AI3_45- | 160.81(10) |
| AI2_45            | 68.22(4)  | ln1_45         |            |
| AI1_45-ln1_45-    |           | C5C_45-AI3_45- | 127.38(10) |
| AI2_45            | 68.96(4)  | ln1_45         |            |
| C1B_45-AI2_45-    |           | C2C_45-AI3_45- | 159.98(10) |
| C5B_45            | 37.20(13) | ln1_45         |            |
| C1B_45-AI2_45-    |           | C4C_45-AI3_45- | 113.65(10) |
| C4B_45            | 61.86(12) | ln1_45         |            |

|                          |            |                             |           |
|--------------------------|------------|-----------------------------|-----------|
| C3C_45-Al3_45-<br>In1_45 | 127.28(10) | C7A_45-C2A_45-<br>Al1_45    | 126.1(2)  |
| C3A_45-Al1_45-<br>C2A_45 | 37.68(12)  | C2A_45-C3A_45-<br>C4A_45    | 107.6(3)  |
| C3A_45-Al1_45-<br>C4A_45 | 37.89(12)  | C2A_45-C3A_45-<br>C8A_45    | 126.2(3)  |
| C2A_45-Al1_45-<br>C4A_45 | 62.76(12)  | C4A_45-C3A_45-<br>C8A_45    | 126.1(3)  |
| C3A_45-Al1_45-<br>C5A_45 | 62.64(12)  | C2A_45-C3A_45-<br>Al1_45    | 71.80(18) |
| C2A_45-Al1_45-<br>C5A_45 | 62.35(12)  | C4A_45-C3A_45-<br>Al1_45    | 71.71(17) |
| C4A_45-Al1_45-<br>C5A_45 | 37.06(12)  | C8A_45-C3A_45-<br>Al1_45    | 125.2(2)  |
| C3A_45-Al1_45-<br>C1A_45 | 62.56(12)  | C5A_45-C4A_45-<br>C3A_45    | 108.0(3)  |
| C2A_45-Al1_45-<br>C1A_45 | 37.21(12)  | C5A_45-C4A_45-<br>C9A_45    | 126.9(3)  |
| C4A_45-Al1_45-<br>C1A_45 | 62.20(12)  | C3A_45-C4A_45-<br>C9A_45    | 125.0(3)  |
| C5A_45-Al1_45-<br>C1A_45 | 37.17(11)  | C5A_45-C4A_45-<br>Al1_45    | 72.17(17) |
| C3A_45-Al1_45-<br>In1_45 | 148.44(10) | C3A_45-C4A_45-<br>Al1_45    | 70.41(17) |
| C2A_45-Al1_45-<br>In1_45 | 173.86(10) | C9A_45-C4A_45-<br>Al1_45    | 121.4(2)  |
| C4A_45-Al1_45-<br>In1_45 | 121.73(10) | C4A_45-C5A_45-<br>C1A_45    | 108.2(3)  |
| C5A_45-Al1_45-<br>In1_45 | 118.14(9)  | C4A_45-C5A_45-<br>C10A_45   | 127.4(3)  |
| C1A_45-Al1_45-<br>In1_45 | 139.34(10) | C1A_45-C5A_45-<br>C10A_45   | 124.4(3)  |
| C2A_45-C1A_45-<br>C5A_45 | 108.1(3)   | C4A_45-C5A_45-<br>Al1_45    | 70.77(17) |
| C2A_45-C1A_45-<br>C6A_45 | 127.2(3)   | C1A_45-C5A_45-<br>Al1_45    | 71.53(17) |
| C5A_45-C1A_45-<br>C6A_45 | 124.6(3)   | C10A_45-C5A_45-<br>Al1_45   | 123.8(2)  |
| C2A_45-C1A_45-<br>Al1_45 | 70.56(18)  | C5A_45-C10A_45-<br>H10A_45  | 109.5     |
| C5A_45-C1A_45-<br>Al1_45 | 71.30(17)  | C5A_45-C10A_45-<br>H10B_45  | 109.5     |
| C6A_45-C1A_45-<br>Al1_45 | 126.7(2)   | H10A_45-C10A_45-<br>H10B_45 | 109.5     |
| C1A_45-C2A_45-<br>C3A_45 | 108.0(3)   | C5A_45-C10A_45-<br>H10C_45  | 109.5     |
| C1A_45-C2A_45-<br>C7A_45 | 127.0(3)   | H10A_45-C10A_45-<br>H10C_45 | 109.5     |
| C3A_45-C2A_45-<br>C7A_45 | 124.8(3)   | H10B_45-C10A_45-<br>H10C_45 | 109.5     |
| C1A_45-C2A_45-<br>Al1_45 | 72.22(17)  | C4A_45-C9A_45-<br>H9AA_45   | 109.5     |
| C3A_45-C2A_45-<br>Al1_45 | 70.52(17)  | C4A_45-C9A_45-<br>H9AB_45   | 109.5     |

|                            |           |                            |           |
|----------------------------|-----------|----------------------------|-----------|
| H9AA_45-C9A_45-<br>H9AB_45 | 109.5     | C6B_45-C1B_45-<br>A12_45   | 126.5(3)  |
| C4A_45-C9A_45-<br>H9AC_45  | 109.5     | C3B_45-C2B_45-<br>C1B_45   | 108.4(3)  |
| H9AA_45-C9A_45-<br>H9AC_45 | 109.5     | C3B_45-C2B_45-<br>C7B_45   | 126.4(4)  |
| H9AB_45-C9A_45-<br>H9AC_45 | 109.5     | C1B_45-C2B_45-<br>C7B_45   | 125.2(4)  |
| C3A_45-C8A_45-<br>H8AA_45  | 109.5     | C3B_45-C2B_45-<br>A12_45   | 72.05(19) |
| C3A_45-C8A_45-<br>H8AB_45  | 109.5     | C1B_45-C2B_45-<br>A12_45   | 70.6(2)   |
| H8AA_45-C8A_45-<br>H8AB_45 | 109.5     | C7B_45-C2B_45-<br>A12_45   | 123.6(3)  |
| C3A_45-C8A_45-<br>H8AC_45  | 109.5     | C2B_45-C3B_45-<br>C4B_45   | 107.6(3)  |
| H8AA_45-C8A_45-<br>H8AC_45 | 109.5     | C2B_45-C3B_45-<br>C8B_45   | 127.4(4)  |
| H8AB_45-C8A_45-<br>H8AC_45 | 109.5     | C4B_45-C3B_45-<br>C8B_45   | 125.0(4)  |
| C2A_45-C7A_45-<br>H7AA_45  | 109.5     | C2B_45-C3B_45-<br>A12_45   | 71.22(19) |
| C2A_45-C7A_45-<br>H7AB_45  | 109.5     | C4B_45-C3B_45-<br>A12_45   | 71.13(18) |
| H7AA_45-C7A_45-<br>H7AB_45 | 109.5     | C8B_45-C3B_45-<br>A12_45   | 124.0(3)  |
| C2A_45-C7A_45-<br>H7AC_45  | 109.5     | C5B_45-C4B_45-<br>C3B_45   | 108.3(3)  |
| H7AA_45-C7A_45-<br>H7AC_45 | 109.5     | C5B_45-C4B_45-<br>C9B_45   | 127.3(3)  |
| H7AB_45-C7A_45-<br>H7AC_45 | 109.5     | C3B_45-C4B_45-<br>C9B_45   | 124.3(3)  |
| C1A_45-C6A_45-<br>H6AA_45  | 109.5     | C5B_45-C4B_45-<br>A12_45   | 70.88(18) |
| C1A_45-C6A_45-<br>H6AB_45  | 109.5     | C3B_45-C4B_45-<br>A12_45   | 72.02(18) |
| H6AA_45-C6A_45-<br>H6AB_45 | 109.5     | C9B_45-C4B_45-<br>A12_45   | 126.2(2)  |
| C1A_45-C6A_45-<br>H6AC_45  | 109.5     | C1B_45-C5B_45-<br>C4B_45   | 107.8(3)  |
| H6AA_45-C6A_45-<br>H6AC_45 | 109.5     | C1B_45-C5B_45-<br>C10B_45  | 125.4(3)  |
| H6AB_45-C6A_45-<br>H6AC_45 | 109.5     | C4B_45-C5B_45-<br>C10B_45  | 126.6(3)  |
| C5B_45-C1B_45-<br>C2B_45   | 107.9(3)  | C1B_45-C5B_45-<br>A12_45   | 71.1(2)   |
| C5B_45-C1B_45-<br>C6B_45   | 125.3(4)  | C4B_45-C5B_45-<br>A12_45   | 72.08(18) |
| C2B_45-C1B_45-<br>C6B_45   | 126.5(4)  | C10B_45-C5B_45-<br>A12_45  | 125.7(2)  |
| C5B_45-C1B_45-<br>A12_45   | 71.65(19) | C5B_45-C10B_45-<br>H10D_45 | 109.5     |
| C2B_45-C1B_45-<br>A12_45   | 72.4(2)   | C5B_45-C10B_45-<br>H10E_45 | 109.5     |

|                             |       |                            |           |
|-----------------------------|-------|----------------------------|-----------|
| H10D_45-C10B_45-<br>H10E_45 | 109.5 | H6BB_45-C6B_45-<br>H6BC_45 | 109.5     |
| C5B_45-C10B_45-<br>H10F_45  | 109.5 | C2C_45-C1C_45-<br>C5C_45   | 106.8(3)  |
| H10D_45-C10B_45-<br>H10F_45 | 109.5 | C2C_45-C1C_45-<br>C6C_45   | 124.9(3)  |
| H10E_45-C10B_45-<br>H10F_45 | 109.5 | C5C_45-C1C_45-<br>C6C_45   | 128.0(3)  |
| C4B_45-C9B_45-<br>H9BA_45   | 109.5 | C2C_45-C1C_45-<br>A13_45   | 71.54(18) |
| C4B_45-C9B_45-<br>H9BB_45   | 109.5 | C5C_45-C1C_45-<br>A13_45   | 71.32(17) |
| H9BA_45-C9B_45-<br>H9BB_45  | 109.5 | C6C_45-C1C_45-<br>A13_45   | 126.7(2)  |
| C4B_45-C9B_45-<br>H9BC_45   | 109.5 | C3C_45-C2C_45-<br>C1C_45   | 109.4(3)  |
| H9BA_45-C9B_45-<br>H9BC_45  | 109.5 | C3C_45-C2C_45-<br>C7C_45   | 125.7(3)  |
| H9BB_45-C9B_45-<br>H9BC_45  | 109.5 | C1C_45-C2C_45-<br>C7C_45   | 124.7(3)  |
| C3B_45-C8B_45-<br>H8BA_45   | 109.5 | C3C_45-C2C_45-<br>A13_45   | 72.58(19) |
| C3B_45-C8B_45-<br>H8BB_45   | 109.5 | C1C_45-C2C_45-<br>A13_45   | 71.29(17) |
| H8BA_45-C8B_45-<br>H8BB_45  | 109.5 | C7C_45-C2C_45-<br>A13_45   | 126.3(2)  |
| C3B_45-C8B_45-<br>H8BC_45   | 109.5 | C2C_45-C3C_45-<br>C4C_45   | 107.9(3)  |
| H8BA_45-C8B_45-<br>H8BC_45  | 109.5 | C2C_45-C3C_45-<br>C8C_45   | 126.8(4)  |
| H8BB_45-C8B_45-<br>H8BC_45  | 109.5 | C4C_45-C3C_45-<br>C8C_45   | 125.3(4)  |
| C2B_45-C7B_45-<br>H7BA_45   | 109.5 | C2C_45-C3C_45-<br>A13_45   | 70.92(18) |
| C2B_45-C7B_45-<br>H7BB_45   | 109.5 | C4C_45-C3C_45-<br>A13_45   | 71.4(2)   |
| H7BA_45-C7B_45-<br>H7BB_45  | 109.5 | C8C_45-C3C_45-<br>A13_45   | 124.4(3)  |
| C2B_45-C7B_45-<br>H7BC_45   | 109.5 | C3C_45-C4C_45-<br>C5C_45   | 108.2(3)  |
| H7BA_45-C7B_45-<br>H7BC_45  | 109.5 | C3C_45-C4C_45-<br>C9C_45   | 125.5(4)  |
| H7BB_45-C7B_45-<br>H7BC_45  | 109.5 | C5C_45-C4C_45-<br>C9C_45   | 126.3(4)  |
| C1B_45-C6B_45-<br>H6BA_45   | 109.5 | C3C_45-C4C_45-<br>A13_45   | 72.08(19) |
| C1B_45-C6B_45-<br>H6BB_45   | 109.5 | C5C_45-C4C_45-<br>A13_45   | 70.81(19) |
| H6BA_45-C6B_45-<br>H6BB_45  | 109.5 | C9C_45-C4C_45-<br>A13_45   | 123.7(3)  |
| C1B_45-C6B_45-<br>H6BC_45   | 109.5 | C1C_45-C5C_45-<br>C4C_45   | 107.6(3)  |
| H6BA_45-C6B_45-<br>H6BC_45  | 109.5 | C1C_45-C5C_45-<br>C10C_45  | 125.5(4)  |

|                             |           |                            |            |
|-----------------------------|-----------|----------------------------|------------|
| C4C_45-C5C_45-<br>C10C_45   | 126.8(4)  | H7CB_45-C7C_45-<br>H7CC_45 | 109.5      |
| C1C_45-C5C_45-<br>A13_45    | 71.20(17) | C1C_45-C6C_45-<br>H6CA_45  | 109.5      |
| C4C_45-C5C_45-<br>A13_45    | 71.86(19) | C1C_45-C6C_45-<br>H6CB_45  | 109.5      |
| C10C_45-C5C_45-<br>A13_45   | 122.3(3)  | H6CA_45-C6C_45-<br>H6CB_45 | 109.5      |
| C5C_45-C10C_45-<br>H10G_45  | 109.5     | C1C_45-C6C_45-<br>H6CC_45  | 109.5      |
| C5C_45-C10C_45-<br>H10H_45  | 109.5     | H6CA_45-C6C_45-<br>H6CC_45 | 109.5      |
| H10G_45-C10C_45-<br>H10H_45 | 109.5     | H6CB_45-C6C_45-<br>H6CC_45 | 109.5      |
| C5C_45-C10C_45-<br>H10I_45  | 109.5     | A11_66-In1_66-<br>A13_66   | 68.01(6)   |
| H10G_45-C10C_45-<br>H10I_45 | 109.5     | A11_66-In1_66-<br>A12_66   | 67.87(6)   |
| H10H_45-C10C_45-<br>H10I_45 | 109.5     | A13_66-In1_66-<br>A12_66   | 69.98(5)   |
| C4C_45-C9C_45-<br>H9CA_45   | 109.5     | C5B_66-A12_66-<br>C1B_66   | 37.54(12)  |
| C4C_45-C9C_45-<br>H9CB_45   | 109.5     | C5B_66-A12_66-<br>C2B_66   | 62.22(13)  |
| H9CA_45-C9C_45-<br>H9CB_45  | 109.5     | C1B_66-A12_66-<br>C2B_66   | 37.06(13)  |
| C4C_45-C9C_45-<br>H9CC_45   | 109.5     | C5B_66-A12_66-<br>C4B_66   | 37.30(13)  |
| H9CA_45-C9C_45-<br>H9CC_45  | 109.5     | C1B_66-A12_66-<br>C4B_66   | 62.30(13)  |
| H9CB_45-C9C_45-<br>H9CC_45  | 109.5     | C2B_66-A12_66-<br>C4B_66   | 61.97(13)  |
| C3C_45-C8C_45-<br>H8CA_45   | 109.5     | C5B_66-A12_66-<br>C3B_66   | 61.98(13)  |
| C3C_45-C8C_45-<br>H8CB_45   | 109.5     | C1B_66-A12_66-<br>C3B_66   | 61.76(13)  |
| H8CA_45-C8C_45-<br>H8CB_45  | 109.5     | C2B_66-A12_66-<br>C3B_66   | 36.79(13)  |
| C3C_45-C8C_45-<br>H8CC_45   | 109.5     | C4B_66-A12_66-<br>C3B_66   | 37.05(13)  |
| H8CA_45-C8C_45-<br>H8CC_45  | 109.5     | C5B_66-A12_66-<br>In1_66   | 152.52(11) |
| H8CB_45-C8C_45-<br>H8CC_45  | 109.5     | C1B_66-A12_66-<br>In1_66   | 164.70(11) |
| C2C_45-C7C_45-<br>H7CA_45   | 109.5     | C2B_66-A12_66-<br>In1_66   | 128.52(11) |
| C2C_45-C7C_45-<br>H7CB_45   | 109.5     | C4B_66-A12_66-<br>In1_66   | 119.75(11) |
| H7CA_45-C7C_45-<br>H7CB_45  | 109.5     | C3B_66-A12_66-<br>In1_66   | 109.82(10) |
| C2C_45-C7C_45-<br>H7CC_45   | 109.5     | C1C_66-A13_66-<br>C2C_66   | 38.08(12)  |
| H7CA_45-C7C_45-<br>H7CC_45  | 109.5     | C1C_66-A13_66-<br>C5C_66   | 37.56(12)  |

|                          |            |                           |            |
|--------------------------|------------|---------------------------|------------|
| C2C_66-Al3_66-<br>C5C_66 | 62.82(13)  | C4A_66-Al1_66-<br>In1_66  | 114.57(14) |
| C1C_66-Al3_66-<br>C3C_66 | 63.04(13)  | C5A_66-C1A_66-<br>C2A_66  | 107.9(3)   |
| C2C_66-Al3_66-<br>C3C_66 | 37.42(12)  | C5A_66-C1A_66-<br>C6A_66  | 126.0(4)   |
| C5C_66-Al3_66-<br>C3C_66 | 62.49(13)  | C2A_66-C1A_66-<br>C6A_66  | 125.9(4)   |
| C1C_66-Al3_66-<br>C4C_66 | 62.53(13)  | C5A_66-C1A_66-<br>Al1_66  | 72.3(2)    |
| C2C_66-Al3_66-<br>C4C_66 | 62.21(13)  | C2A_66-C1A_66-<br>Al1_66  | 70.92(19)  |
| C5C_66-Al3_66-<br>C4C_66 | 37.25(12)  | C6A_66-C1A_66-<br>Al1_66  | 125.9(3)   |
| C3C_66-Al3_66-<br>C4C_66 | 37.03(12)  | C3A_66-C2A_66-<br>C1A_66  | 107.1(3)   |
| C1C_66-Al3_66-<br>In1_66 | 155.28(13) | C3A_66-C2A_66-<br>C7A_66  | 126.1(3)   |
| C2C_66-Al3_66-<br>In1_66 | 166.11(13) | C1A_66-C2A_66-<br>C7A_66  | 126.8(3)   |
| C5C_66-Al3_66-<br>In1_66 | 125.31(12) | C3A_66-C2A_66-<br>Al1_66  | 72.0(2)    |
| C3C_66-Al3_66-<br>In1_66 | 132.57(13) | C1A_66-C2A_66-<br>Al1_66  | 71.4(2)    |
| C4C_66-Al3_66-<br>In1_66 | 116.16(12) | C7A_66-C2A_66-<br>Al1_66  | 124.2(3)   |
| C2A_66-Al1_66-<br>C1A_66 | 37.72(13)  | C2A_66-C3A_66-<br>C4A_66  | 108.7(3)   |
| C2A_66-Al1_66-<br>C3A_66 | 37.06(12)  | C2A_66-C3A_66-<br>C8A_66  | 125.9(3)   |
| C1A_66-Al1_66-<br>C3A_66 | 61.92(13)  | C4A_66-C3A_66-<br>C8A_66  | 125.4(3)   |
| C2A_66-Al1_66-<br>C5A_66 | 62.44(14)  | C2A_66-C3A_66-<br>Al1_66  | 70.96(19)  |
| C1A_66-Al1_66-<br>C5A_66 | 37.20(16)  | C4A_66-C3A_66-<br>Al1_66  | 72.15(19)  |
| C3A_66-Al1_66-<br>C5A_66 | 61.50(13)  | C8A_66-C3A_66-<br>Al1_66  | 124.0(2)   |
| C2A_66-Al1_66-<br>C4A_66 | 62.11(14)  | C5A_66-C4A_66-<br>C3A_66  | 108.2(3)   |
| C1A_66-Al1_66-<br>C4A_66 | 61.65(15)  | C5A_66-C4A_66-<br>C9A_66  | 126.7(4)   |
| C3A_66-Al1_66-<br>C4A_66 | 36.99(12)  | C3A_66-C4A_66-<br>C9A_66  | 125.1(4)   |
| C5A_66-Al1_66-<br>C4A_66 | 36.44(14)  | C5A_66-C4A_66-<br>Al1_66  | 71.7(2)    |
| C2A_66-Al1_66-<br>In1_66 | 168.27(14) | C3A_66-C4A_66-<br>Al1_66  | 70.86(19)  |
| C1A_66-Al1_66-<br>In1_66 | 152.55(14) | C9A_66-C4A_66-<br>Al1_66  | 122.3(3)   |
| C3A_66-Al1_66-<br>In1_66 | 133.37(14) | C4A_66-C5A_66-<br>C1A_66  | 108.1(3)   |
| C5A_66-Al1_66-<br>In1_66 | 122.48(14) | C4A_66-C5A_66-<br>C10A_66 | 125.9(5)   |



|                             |          |                            |           |
|-----------------------------|----------|----------------------------|-----------|
| C1A_66-C5A_66-<br>C10A_66   | 126.0(4) | H7AB_66-C7A_66-<br>H7AC_66 | 109.5     |
| C4A_66-C5A_66-<br>A11_66    | 71.8(2)  | C1A_66-C6A_66-<br>H6AA_66  | 109.5     |
| C1A_66-C5A_66-<br>A11_66    | 70.5(2)  | C1A_66-C6A_66-<br>H6AB_66  | 109.5     |
| C10A_66-C5A_66-<br>A11_66   | 122.6(3) | H6AA_66-C6A_66-<br>H6AB_66 | 109.5     |
| C5A_66-C10A_66-<br>H10A_66  | 109.5    | C1A_66-C6A_66-<br>H6AC_66  | 109.5     |
| C5A_66-C10A_66-<br>H10B_66  | 109.5    | H6AA_66-C6A_66-<br>H6AC_66 | 109.5     |
| H10A_66-C10A_66-<br>H10B_66 | 109.5    | H6AB_66-C6A_66-<br>H6AC_66 | 109.5     |
| C5A_66-C10A_66-<br>H10C_66  | 109.5    | C2B_66-C1B_66-<br>C5B_66   | 107.9(3)  |
| H10A_66-C10A_66-<br>H10C_66 | 109.5    | C2B_66-C1B_66-<br>C6B_66   | 127.4(3)  |
| H10B_66-C10A_66-<br>H10C_66 | 109.5    | C5B_66-C1B_66-<br>C6B_66   | 124.5(3)  |
| C4A_66-C9A_66-<br>H9AA_66   | 109.5    | C2B_66-C1B_66-<br>A12_66   | 71.93(19) |
| C4A_66-C9A_66-<br>H9AB_66   | 109.5    | C5B_66-C1B_66-<br>A12_66   | 70.98(19) |
| H9AA_66-C9A_66-<br>H9AB_66  | 109.5    | C6B_66-C1B_66-<br>A12_66   | 126.2(3)  |
| C4A_66-C9A_66-<br>H9AC_66   | 109.5    | C3B_66-C2B_66-<br>C1B_66   | 108.3(3)  |
| H9AA_66-C9A_66-<br>H9AC_66  | 109.5    | C3B_66-C2B_66-<br>C7B_66   | 125.1(4)  |
| H9AB_66-C9A_66-<br>H9AC_66  | 109.5    | C1B_66-C2B_66-<br>C7B_66   | 126.6(4)  |
| C3A_66-C8A_66-<br>H8AA_66   | 109.5    | C3B_66-C2B_66-<br>A12_66   | 72.13(19) |
| C3A_66-C8A_66-<br>H8AB_66   | 109.5    | C1B_66-C2B_66-<br>A12_66   | 71.01(19) |
| H8AA_66-C8A_66-<br>H8AB_66  | 109.5    | C7B_66-C2B_66-<br>A12_66   | 123.7(3)  |
| C3A_66-C8A_66-<br>H8AC_66   | 109.5    | C2B_66-C3B_66-<br>C4B_66   | 108.4(3)  |
| H8AA_66-C8A_66-<br>H8AC_66  | 109.5    | C2B_66-C3B_66-<br>C8B_66   | 124.5(4)  |
| H8AB_66-C8A_66-<br>H8AC_66  | 109.5    | C4B_66-C3B_66-<br>C8B_66   | 127.1(4)  |
| C2A_66-C7A_66-<br>H7AA_66   | 109.5    | C2B_66-C3B_66-<br>A12_66   | 71.08(19) |
| C2A_66-C7A_66-<br>H7AB_66   | 109.5    | C4B_66-C3B_66-<br>A12_66   | 71.15(19) |
| H7AA_66-C7A_66-<br>H7AB_66  | 109.5    | C8B_66-C3B_66-<br>A12_66   | 123.0(3)  |
| C2A_66-C7A_66-<br>H7AC_66   | 109.5    | C5B_66-C4B_66-<br>C3B_66   | 107.5(3)  |
| H7AA_66-C7A_66-<br>H7AC_66  | 109.5    | C5B_66-C4B_66-<br>C9B_66   | 126.1(4)  |

|                             |           |                            |           |
|-----------------------------|-----------|----------------------------|-----------|
| C3B_66-C4B_66-<br>C9B_66    | 126.4(4)  | H8BB_66-C8B_66-<br>H8BC_66 | 109.5     |
| C5B_66-C4B_66-<br>A12_66    | 70.43(19) | C2B_66-C7B_66-<br>H7BA_66  | 109.5     |
| C3B_66-C4B_66-<br>A12_66    | 71.80(19) | C2B_66-C7B_66-<br>H7BB_66  | 109.5     |
| C9B_66-C4B_66-<br>A12_66    | 123.5(3)  | H7BA_66-C7B_66-<br>H7BB_66 | 109.5     |
| C4B_66-C5B_66-<br>C1B_66    | 108.0(3)  | C2B_66-C7B_66-<br>H7BC_66  | 109.5     |
| C4B_66-C5B_66-<br>C10B_66   | 125.9(3)  | H7BA_66-C7B_66-<br>H7BC_66 | 109.5     |
| C1B_66-C5B_66-<br>C10B_66   | 125.8(4)  | H7BB_66-C7B_66-<br>H7BC_66 | 109.5     |
| C4B_66-C5B_66-<br>A12_66    | 72.26(19) | C1B_66-C6B_66-<br>H6BA_66  | 109.5     |
| C1B_66-C5B_66-<br>A12_66    | 71.48(19) | C1B_66-C6B_66-<br>H6BB_66  | 109.5     |
| C10B_66-C5B_66-<br>A12_66   | 126.7(2)  | H6BA_66-C6B_66-<br>H6BB_66 | 109.5     |
| C5B_66-C10B_66-<br>H10D_66  | 109.5     | C1B_66-C6B_66-<br>H6BC_66  | 109.5     |
| C5B_66-C10B_66-<br>H10E_66  | 109.5     | H6BA_66-C6B_66-<br>H6BC_66 | 109.5     |
| H10D_66-C10B_66-<br>H10E_66 | 109.5     | H6BB_66-C6B_66-<br>H6BC_66 | 109.5     |
| C5B_66-C10B_66-<br>H10F_66  | 109.5     | C5C_66-C1C_66-<br>C2C_66   | 107.6(3)  |
| H10D_66-C10B_66-<br>H10F_66 | 109.5     | C5C_66-C1C_66-<br>C6C_66   | 126.9(3)  |
| H10E_66-C10B_66-<br>H10F_66 | 109.5     | C2C_66-C1C_66-<br>C6C_66   | 125.5(3)  |
| C4B_66-C9B_66-<br>H9BA_66   | 109.5     | C5C_66-C1C_66-<br>A13_66   | 72.18(19) |
| C4B_66-C9B_66-<br>H9BB_66   | 109.5     | C2C_66-C1C_66-<br>A13_66   | 71.13(19) |
| H9BA_66-C9B_66-<br>H9BB_66  | 109.5     | C6C_66-C1C_66-<br>A13_66   | 124.2(3)  |
| C4B_66-C9B_66-<br>H9BC_66   | 109.5     | C3C_66-C2C_66-<br>C1C_66   | 108.3(3)  |
| H9BA_66-C9B_66-<br>H9BC_66  | 109.5     | C3C_66-C2C_66-<br>C7C_66   | 127.2(3)  |
| H9BB_66-C9B_66-<br>H9BC_66  | 109.5     | C1C_66-C2C_66-<br>C7C_66   | 124.2(3)  |
| C3B_66-C8B_66-<br>H8BA_66   | 109.5     | C3C_66-C2C_66-<br>A13_66   | 72.6(2)   |
| C3B_66-C8B_66-<br>H8BB_66   | 109.5     | C1C_66-C2C_66-<br>A13_66   | 70.79(19) |
| H8BA_66-C8B_66-<br>H8BB_66  | 109.5     | C7C_66-C2C_66-<br>A13_66   | 126.9(3)  |
| C3B_66-C8B_66-<br>H8BC_66   | 109.5     | C4C_66-C3C_66-<br>C2C_66   | 107.6(3)  |
| H8BA_66-C8B_66-<br>H8BC_66  | 109.5     | C4C_66-C3C_66-<br>C8C_66   | 125.8(3)  |

|                             |           |                            |           |
|-----------------------------|-----------|----------------------------|-----------|
| C2C_66-C3C_66-<br>C8C_66    | 126.7(3)  | H9CB_66-C9C_66-<br>H9CC_66 | 109.5     |
| C4C_66-C3C_66-<br>A13_66    | 71.67(19) | C3C_66-C8C_66-<br>H8CA_66  | 109.5     |
| C2C_66-C3C_66-<br>A13_66    | 70.03(19) | C3C_66-C8C_66-<br>H8CB_66  | 109.5     |
| C8C_66-C3C_66-<br>A13_66    | 124.3(3)  | H8CA_66-C8C_66-<br>H8CB_66 | 109.5     |
| C3C_66-C4C_66-<br>C5C_66    | 108.6(3)  | C3C_66-C8C_66-<br>H8CC_66  | 109.5     |
| C3C_66-C4C_66-<br>C9C_66    | 126.1(3)  | H8CA_66-C8C_66-<br>H8CC_66 | 109.5     |
| C5C_66-C4C_66-<br>C9C_66    | 125.3(3)  | H8CB_66-C8C_66-<br>H8CC_66 | 109.5     |
| C3C_66-C4C_66-<br>A13_66    | 71.29(18) | C2C_66-C7C_66-<br>H7CA_66  | 109.5     |
| C5C_66-C4C_66-<br>A13_66    | 70.70(18) | C2C_66-C7C_66-<br>H7CB_66  | 109.5     |
| C9C_66-C4C_66-<br>A13_66    | 124.3(3)  | H7CA_66-C7C_66-<br>H7CB_66 | 109.5     |
| C1C_66-C5C_66-<br>C4C_66    | 107.9(3)  | C2C_66-C7C_66-<br>H7CC_66  | 109.5     |
| C1C_66-C5C_66-<br>C10C_66   | 126.6(3)  | H7CA_66-C7C_66-<br>H7CC_66 | 109.5     |
| C4C_66-C5C_66-<br>C10C_66   | 125.5(3)  | H7CB_66-C7C_66-<br>H7CC_66 | 109.5     |
| C1C_66-C5C_66-<br>A13_66    | 70.27(18) | C1C_66-C6C_66-<br>H6CA_66  | 109.5     |
| C4C_66-C5C_66-<br>A13_66    | 72.05(18) | C1C_66-C6C_66-<br>H6CB_66  | 109.5     |
| C10C_66-C5C_66-<br>A13_66   | 123.7(3)  | H6CA_66-C6C_66-<br>H6CB_66 | 109.5     |
| C5C_66-C10C_66-<br>H10G_66  | 109.5     | C1C_66-C6C_66-<br>H6CC_66  | 109.5     |
| C5C_66-C10C_66-<br>H10H_66  | 109.5     | H6CA_66-C6C_66-<br>H6CC_66 | 109.5     |
| H10G_66-C10C_66-<br>H10H_66 | 109.5     | H6CB_66-C6C_66-<br>H6CC_66 | 109.5     |
| C5C_66-C10C_66-<br>H10I_66  | 109.5     | A13_68-In1_68-<br>A12_68   | 68.25(4)  |
| H10G_66-C10C_66-<br>H10I_66 | 109.5     | A13_68-In1_68-<br>A11_68   | 67.73(4)  |
| H10H_66-C10C_66-<br>H10I_66 | 109.5     | A12_68-In1_68-<br>A11_68   | 68.04(4)  |
| C4C_66-C9C_66-<br>H9CA_66   | 109.5     | C5B_68-A12_68-<br>C4B_68   | 37.92(19) |
| C4C_66-C9C_66-<br>H9CB_66   | 109.5     | C5B_68-A12_68-<br>C3B_68   | 63.09(19) |
| H9CA_66-C9C_66-<br>H9CB_66  | 109.5     | C4B_68-A12_68-<br>C3B_68   | 38.0(2)   |
| C4C_66-C9C_66-<br>H9CC_66   | 109.5     | C5B_68-A12_68-<br>C1B_68   | 37.32(19) |
| H9CA_66-C9C_66-<br>H9CC_66  | 109.5     | C4B_68-A12_68-<br>C1B_68   | 62.48(19) |

|                          |            |                          |            |
|--------------------------|------------|--------------------------|------------|
| C3B_68-Al2_68-<br>C1B_68 | 61.94(17)  | C2A_68-Al1_68-<br>C4A_68 | 61.80(16)  |
| C5B_68-Al2_68-<br>C2B_68 | 62.49(19)  | C1A_68-Al1_68-<br>C5A_68 | 37.45(16)  |
| C4B_68-Al2_68-<br>C2B_68 | 62.7(2)    | C2A_68-Al1_68-<br>C5A_68 | 62.26(18)  |
| C3B_68-Al2_68-<br>C2B_68 | 37.04(19)  | C4A_68-Al1_68-<br>C5A_68 | 37.15(17)  |
| C1B_68-Al2_68-<br>C2B_68 | 36.84(16)  | C1A_68-Al1_68-<br>C3A_68 | 62.62(17)  |
| C5B_68-Al2_68-<br>In1_68 | 153.57(17) | C2A_68-Al1_68-<br>C3A_68 | 37.24(15)  |
| C4B_68-Al2_68-<br>In1_68 | 126.12(16) | C4A_68-Al1_68-<br>C3A_68 | 37.05(18)  |
| C3B_68-Al2_68-<br>In1_68 | 119.56(14) | C5A_68-Al1_68-<br>C3A_68 | 62.38(19)  |
| C1B_68-Al2_68-<br>In1_68 | 169.10(14) | C1A_68-Al1_68-<br>In1_68 | 155.66(15) |
| C2B_68-Al2_68-<br>In1_68 | 137.37(12) | C2A_68-Al1_68-<br>In1_68 | 163.93(14) |
| C1C_68-Al3_68-<br>C2C_68 | 37.54(16)  | C4A_68-Al1_68-<br>In1_68 | 112.10(12) |
| C1C_68-Al3_68-<br>C5C_68 | 37.82(15)  | C5A_68-Al1_68-<br>In1_68 | 123.07(13) |
| C2C_68-Al3_68-<br>C5C_68 | 62.90(15)  | C3A_68-Al1_68-<br>In1_68 | 128.73(12) |
| C1C_68-Al3_68-<br>C3C_68 | 61.99(14)  | C2A_68-C1A_68-<br>C5A_68 | 107.6(4)   |
| C2C_68-Al3_68-<br>C3C_68 | 37.00(14)  | C2A_68-C1A_68-<br>C6A_68 | 125.0(4)   |
| C5C_68-Al3_68-<br>C3C_68 | 62.08(13)  | C5A_68-C1A_68-<br>C6A_68 | 127.2(5)   |
| C1C_68-Al3_68-<br>C4C_68 | 61.83(14)  | C2A_68-C1A_68-<br>Al1_68 | 71.4(2)    |
| C2C_68-Al3_68-<br>C4C_68 | 61.91(14)  | C5A_68-C1A_68-<br>Al1_68 | 71.8(2)    |
| C5C_68-Al3_68-<br>C4C_68 | 36.74(13)  | C6A_68-C1A_68-<br>Al1_68 | 126.9(3)   |
| C3C_68-Al3_68-<br>C4C_68 | 36.92(12)  | C3A_68-C2A_68-<br>C1A_68 | 108.8(4)   |
| C1C_68-Al3_68-<br>In1_68 | 158.30(13) | C3A_68-C2A_68-<br>C7A_68 | 126.8(5)   |
| C2C_68-Al3_68-<br>In1_68 | 163.09(12) | C1A_68-C2A_68-<br>C7A_68 | 124.2(4)   |
| C5C_68-Al3_68-<br>In1_68 | 126.11(12) | C3A_68-C2A_68-<br>Al1_68 | 72.1(2)    |
| C3C_68-Al3_68-<br>In1_68 | 130.25(11) | C1A_68-C2A_68-<br>Al1_68 | 71.2(2)    |
| C4C_68-Al3_68-<br>In1_68 | 115.26(10) | C7A_68-C2A_68-<br>Al1_68 | 126.3(3)   |
| C1A_68-Al1_68-<br>C2A_68 | 37.42(18)  | C4A_68-C3A_68-<br>C2A_68 | 107.0(4)   |
| C1A_68-Al1_68-<br>C4A_68 | 62.21(16)  | C4A_68-C3A_68-<br>C8A_68 | 126.0(4)   |

|                             |          |                            |          |
|-----------------------------|----------|----------------------------|----------|
| C2A_68-C3A_68-<br>C8A_68    | 127.0(5) | H9AB_68-C9A_68-<br>H9AC_68 | 109.5    |
| C4A_68-C3A_68-<br>A11_68    | 71.2(2)  | C3A_68-C8A_68-<br>H8AA_68  | 109.5    |
| C2A_68-C3A_68-<br>A11_68    | 70.7(2)  | C3A_68-C8A_68-<br>H8AB_68  | 109.5    |
| C8A_68-C3A_68-<br>A11_68    | 124.0(3) | H8AA_68-C8A_68-<br>H8AB_68 | 109.5    |
| C3A_68-C4A_68-<br>C5A_68    | 109.1(4) | C3A_68-C8A_68-<br>H8AC_68  | 109.5    |
| C3A_68-C4A_68-<br>C9A_68    | 124.9(5) | H8AA_68-C8A_68-<br>H8AC_68 | 109.5    |
| C5A_68-C4A_68-<br>C9A_68    | 126.0(5) | H8AB_68-C8A_68-<br>H8AC_68 | 109.5    |
| C3A_68-C4A_68-<br>A11_68    | 71.7(2)  | C2A_68-C7A_68-<br>H7AA_68  | 109.5    |
| C5A_68-C4A_68-<br>A11_68    | 71.4(2)  | C2A_68-C7A_68-<br>H7AB_68  | 109.5    |
| C9A_68-C4A_68-<br>A11_68    | 122.5(3) | H7AA_68-C7A_68-<br>H7AB_68 | 109.5    |
| C4A_68-C5A_68-<br>C1A_68    | 107.5(4) | C2A_68-C7A_68-<br>H7AC_68  | 109.5    |
| C4A_68-C5A_68-<br>C10A_68   | 125.9(5) | H7AA_68-C7A_68-<br>H7AC_68 | 109.5    |
| C1A_68-C5A_68-<br>C10A_68   | 126.6(5) | H7AB_68-C7A_68-<br>H7AC_68 | 109.5    |
| C4A_68-C5A_68-<br>A11_68    | 71.4(2)  | C1A_68-C6A_68-<br>H6AA_68  | 109.5    |
| C1A_68-C5A_68-<br>A11_68    | 70.8(2)  | C1A_68-C6A_68-<br>H6AB_68  | 109.5    |
| C10A_68-C5A_68-<br>A11_68   | 122.8(3) | H6AA_68-C6A_68-<br>H6AB_68 | 109.5    |
| C5A_68-C10A_68-<br>H10A_68  | 109.5    | C1A_68-C6A_68-<br>H6AC_68  | 109.5    |
| C5A_68-C10A_68-<br>H10B_68  | 109.5    | H6AA_68-C6A_68-<br>H6AC_68 | 109.5    |
| H10A_68-C10A_68-<br>H10B_68 | 109.5    | H6AB_68-C6A_68-<br>H6AC_68 | 109.5    |
| C5A_68-C10A_68-<br>H10C_68  | 109.5    | C2B_68-C1B_68-<br>C5B_68   | 109.4(4) |
| H10A_68-C10A_68-<br>H10C_68 | 109.5    | C2B_68-C1B_68-<br>C6B_68   | 126.5(5) |
| H10B_68-C10A_68-<br>H10C_68 | 109.5    | C5B_68-C1B_68-<br>C6B_68   | 124.0(5) |
| C4A_68-C9A_68-<br>H9AA_68   | 109.5    | C2B_68-C1B_68-<br>A12_68   | 72.2(3)  |
| C4A_68-C9A_68-<br>H9AB_68   | 109.5    | C5B_68-C1B_68-<br>A12_68   | 70.9(3)  |
| H9AA_68-C9A_68-<br>H9AB_68  | 109.5    | C6B_68-C1B_68-<br>A12_68   | 125.6(3) |
| C4A_68-C9A_68-<br>H9AC_68   | 109.5    | C1B_68-C2B_68-<br>C3B_68   | 108.1(5) |
| H9AA_68-C9A_68-<br>H9AC_68  | 109.5    | C1B_68-C2B_68-<br>C7B_68   | 126.2(6) |

|                             |          |                             |          |
|-----------------------------|----------|-----------------------------|----------|
| C3B_68-C2B_68-<br>C7B_68    | 125.8(5) | H10E_68-C10B_68-<br>H10F_68 | 109.5    |
| C1B_68-C2B_68-<br>A12_68    | 71.0(3)  | C4B_68-C9B_68-<br>H9BA_68   | 109.5    |
| C3B_68-C2B_68-<br>A12_68    | 70.9(3)  | C4B_68-C9B_68-<br>H9BB_68   | 109.5    |
| C7B_68-C2B_68-<br>A12_68    | 123.9(4) | H9BA_68-C9B_68-<br>H9BB_68  | 109.5    |
| C2B_68-C3B_68-<br>C4B_68    | 108.1(4) | C4B_68-C9B_68-<br>H9BC_68   | 109.5    |
| C2B_68-C3B_68-<br>C8B_68    | 126.3(7) | H9BA_68-C9B_68-<br>H9BC_68  | 109.5    |
| C4B_68-C3B_68-<br>C8B_68    | 125.5(7) | H9BB_68-C9B_68-<br>H9BC_68  | 109.5    |
| C2B_68-C3B_68-<br>A12_68    | 72.1(3)  | C3B_68-C8B_68-<br>H8BA_68   | 109.5    |
| C4B_68-C3B_68-<br>A12_68    | 70.9(3)  | C3B_68-C8B_68-<br>H8BB_68   | 109.5    |
| C8B_68-C3B_68-<br>A12_68    | 123.4(4) | H8BA_68-C8B_68-<br>H8BB_68  | 109.5    |
| C5B_68-C4B_68-<br>C3B_68    | 107.0(5) | C3B_68-C8B_68-<br>H8BC_68   | 109.5    |
| C5B_68-C4B_68-<br>C9B_68    | 125.3(7) | H8BA_68-C8B_68-<br>H8BC_68  | 109.5    |
| C3B_68-C4B_68-<br>C9B_68    | 127.7(6) | H8BB_68-C8B_68-<br>H8BC_68  | 109.5    |
| C5B_68-C4B_68-<br>A12_68    | 70.7(3)  | C2B_68-C7B_68-<br>H7BA_68   | 109.5    |
| C3B_68-C4B_68-<br>A12_68    | 71.1(3)  | C2B_68-C7B_68-<br>H7BB_68   | 109.5    |
| C9B_68-C4B_68-<br>A12_68    | 124.0(5) | H7BA_68-C7B_68-<br>H7BB_68  | 109.5    |
| C1B_68-C5B_68-<br>C4B_68    | 107.4(4) | C2B_68-C7B_68-<br>H7BC_68   | 109.5    |
| C1B_68-C5B_68-<br>C10B_68   | 124.8(6) | H7BA_68-C7B_68-<br>H7BC_68  | 109.5    |
| C4B_68-C5B_68-<br>C10B_68   | 127.5(6) | H7BB_68-C7B_68-<br>H7BC_68  | 109.5    |
| C1B_68-C5B_68-<br>A12_68    | 71.8(2)  | C1B_68-C6B_68-<br>H6BA_68   | 109.5    |
| C4B_68-C5B_68-<br>A12_68    | 71.4(3)  | C1B_68-C6B_68-<br>H6BB_68   | 109.5    |
| C10B_68-C5B_68-<br>A12_68   | 126.4(5) | H6BA_68-C6B_68-<br>H6BB_68  | 109.5    |
| C5B_68-C10B_68-<br>H10D_68  | 109.5    | C1B_68-C6B_68-<br>H6BC_68   | 109.5    |
| C5B_68-C10B_68-<br>H10E_68  | 109.5    | H6BA_68-C6B_68-<br>H6BC_68  | 109.5    |
| H10D_68-C10B_68-<br>H10E_68 | 109.5    | H6BB_68-C6B_68-<br>H6BC_68  | 109.5    |
| C5B_68-C10B_68-<br>H10F_68  | 109.5    | C2C_68-C1C_68-<br>C5C_68    | 108.3(3) |
| H10D_68-C10B_68-<br>H10F_68 | 109.5    | C2C_68-C1C_68-<br>C6C_68    | 125.0(5) |

|                           |           |                             |          |
|---------------------------|-----------|-----------------------------|----------|
| C5C_68-C1C_68-<br>C6C_68  | 126.5(5)  | C10C_68-C5C_68-<br>A13_68   | 123.0(3) |
| C2C_68-C1C_68-<br>A13_68  | 71.4(2)   | C5C_68-C10C_68-<br>H10G_68  | 109.5    |
| C5C_68-C1C_68-<br>A13_68  | 72.0(2)   | C5C_68-C10C_68-<br>H10H_68  | 109.5    |
| C6C_68-C1C_68-<br>A13_68  | 126.0(3)  | H10G_68-C10C_68-<br>H10H_68 | 109.5    |
| C3C_68-C2C_68-<br>C1C_68  | 107.7(3)  | C5C_68-C10C_68-<br>H10I_68  | 109.5    |
| C3C_68-C2C_68-<br>C7C_68  | 126.9(4)  | H10G_68-C10C_68-<br>H10I_68 | 109.5    |
| C1C_68-C2C_68-<br>C7C_68  | 125.2(4)  | H10H_68-C10C_68-<br>H10I_68 | 109.5    |
| C3C_68-C2C_68-<br>A13_68  | 72.3(2)   | C4C_68-C9C_68-<br>H9CA_68   | 109.5    |
| C1C_68-C2C_68-<br>A13_68  | 71.0(2)   | C4C_68-C9C_68-<br>H9CB_68   | 109.5    |
| C7C_68-C2C_68-<br>A13_68  | 125.9(3)  | H9CA_68-C9C_68-<br>H9CB_68  | 109.5    |
| C2C_68-C3C_68-<br>C4C_68  | 108.2(3)  | C4C_68-C9C_68-<br>H9CC_68   | 109.5    |
| C2C_68-C3C_68-<br>C8C_68  | 126.3(4)  | H9CA_68-C9C_68-<br>H9CC_68  | 109.5    |
| C4C_68-C3C_68-<br>C8C_68  | 125.5(4)  | H9CB_68-C9C_68-<br>H9CC_68  | 109.5    |
| C2C_68-C3C_68-<br>A13_68  | 70.7(2)   | C3C_68-C8C_68-<br>H8CA_68   | 109.5    |
| C4C_68-C3C_68-<br>A13_68  | 71.82(19) | C3C_68-C8C_68-<br>H8CB_68   | 109.5    |
| C8C_68-C3C_68-<br>A13_68  | 123.6(3)  | H8CA_68-C8C_68-<br>H8CB_68  | 109.5    |
| C5C_68-C4C_68-<br>C3C_68  | 109.1(3)  | C3C_68-C8C_68-<br>H8CC_68   | 109.5    |
| C5C_68-C4C_68-<br>C9C_68  | 125.5(4)  | H8CA_68-C8C_68-<br>H8CC_68  | 109.5    |
| C3C_68-C4C_68-<br>C9C_68  | 125.4(4)  | H8CB_68-C8C_68-<br>H8CC_68  | 109.5    |
| C5C_68-C4C_68-<br>A13_68  | 71.3(2)   | C2C_68-C7C_68-<br>H7CA_68   | 109.5    |
| C3C_68-C4C_68-<br>A13_68  | 71.26(19) | C2C_68-C7C_68-<br>H7CB_68   | 109.5    |
| C9C_68-C4C_68-<br>A13_68  | 121.8(3)  | H7CA_68-C7C_68-<br>H7CB_68  | 109.5    |
| C4C_68-C5C_68-<br>C1C_68  | 106.7(3)  | C2C_68-C7C_68-<br>H7CC_68   | 109.5    |
| C4C_68-C5C_68-<br>C10C_68 | 125.6(4)  | H7CA_68-C7C_68-<br>H7CC_68  | 109.5    |
| C1C_68-C5C_68-<br>C10C_68 | 127.7(4)  | H7CB_68-C7C_68-<br>H7CC_68  | 109.5    |
| C4C_68-C5C_68-<br>A13_68  | 71.93(19) | C1C_68-C6C_68-<br>H6CA_68   | 109.5    |
| C1C_68-C5C_68-<br>A13_68  | 70.1(2)   | C1C_68-C6C_68-<br>H6CB_68   | 109.5    |

|                            |            |                          |            |
|----------------------------|------------|--------------------------|------------|
| H6CA_68-C6C_68-<br>H6CB_68 | 109.5      | C5C_69-Al3_69-<br>C3C_69 | 62.30(15)  |
| C1C_68-C6C_68-<br>H6CC_68  | 109.5      | C2C_69-Al3_69-<br>C4C_69 | 62.48(17)  |
| H6CA_68-C6C_68-<br>H6CC_68 | 109.5      | C1C_69-Al3_69-<br>C4C_69 | 62.16(16)  |
| H6CB_68-C6C_68-<br>H6CC_68 | 109.5      | C5C_69-Al3_69-<br>C4C_69 | 37.37(14)  |
| Al1_69-In1_69-<br>Al2_69   | 70.18(4)   | C3C_69-Al3_69-<br>C4C_69 | 37.27(16)  |
| Al1_69-In1_69-<br>Al3_69   | 68.97(4)   | C2C_69-Al3_69-<br>In1_69 | 171.76(12) |
| Al2_69-In1_69-<br>Al3_69   | 69.41(4)   | C1C_69-Al3_69-<br>In1_69 | 150.71(12) |
| C5B_69-Al2_69-<br>C4B_69   | 38.01(17)  | C5C_69-Al3_69-<br>In1_69 | 122.82(12) |
| C5B_69-Al2_69-<br>C1B_69   | 37.21(17)  | C3C_69-Al3_69-<br>In1_69 | 137.14(13) |
| C4B_69-Al2_69-<br>C1B_69   | 62.78(17)  | C4C_69-Al3_69-<br>In1_69 | 117.10(13) |
| C5B_69-Al2_69-<br>C2B_69   | 61.84(15)  | C1A_69-Al1_69-<br>C2A_69 | 37.19(14)  |
| C4B_69-Al2_69-<br>C2B_69   | 61.69(17)  | C1A_69-Al1_69-<br>C3A_69 | 61.60(13)  |
| C1B_69-Al2_69-<br>C2B_69   | 37.27(13)  | C2A_69-Al1_69-<br>C3A_69 | 36.77(12)  |
| C5B_69-Al2_69-<br>C3B_69   | 62.33(14)  | C1A_69-Al1_69-<br>C5A_69 | 37.56(15)  |
| C4B_69-Al2_69-<br>C3B_69   | 36.99(15)  | C2A_69-Al1_69-<br>C5A_69 | 61.95(14)  |
| C1B_69-Al2_69-<br>C3B_69   | 62.27(15)  | C3A_69-Al1_69-<br>C5A_69 | 61.07(13)  |
| C2B_69-Al2_69-<br>C3B_69   | 36.64(16)  | C1A_69-Al1_69-<br>C4A_69 | 61.93(14)  |
| C5B_69-Al2_69-<br>In1_69   | 154.99(15) | C2A_69-Al1_69-<br>C4A_69 | 61.55(13)  |
| C4B_69-Al2_69-<br>In1_69   | 126.46(14) | C3A_69-Al1_69-<br>C4A_69 | 36.45(13)  |
| C1B_69-Al2_69-<br>In1_69   | 167.80(13) | C5A_69-Al1_69-<br>C4A_69 | 36.59(15)  |
| C2B_69-Al2_69-<br>In1_69   | 136.09(10) | C1A_69-Al1_69-<br>In1_69 | 153.13(12) |
| C3B_69-Al2_69-<br>In1_69   | 119.10(11) | C2A_69-Al1_69-<br>In1_69 | 169.29(11) |
| C2C_69-Al3_69-<br>C1C_69   | 37.33(15)  | C3A_69-Al1_69-<br>In1_69 | 135.68(10) |
| C2C_69-Al3_69-<br>C5C_69   | 62.45(16)  | C5A_69-Al1_69-<br>In1_69 | 124.29(11) |
| C1C_69-Al3_69-<br>C5C_69   | 37.13(16)  | C4A_69-Al1_69-<br>In1_69 | 117.26(10) |
| C2C_69-Al3_69-<br>C3C_69   | 37.36(16)  | C2A_69-C1A_69-<br>C5A_69 | 107.1(3)   |
| C1C_69-Al3_69-<br>C3C_69   | 62.13(15)  | C2A_69-C1A_69-<br>C6A_69 | 126.4(5)   |



|                           |           |                             |          |
|---------------------------|-----------|-----------------------------|----------|
| C5A_69-C1A_69-<br>C6A_69  | 126.4(5)  | C10A_69-C5A_69-<br>A11_69   | 122.5(3) |
| C2A_69-C1A_69-<br>A11_69  | 71.44(19) | C5A_69-C10A_69-<br>H10A_69  | 109.5    |
| C5A_69-C1A_69-<br>A11_69  | 71.7(2)   | C5A_69-C10A_69-<br>H10B_69  | 109.5    |
| C6A_69-C1A_69-<br>A11_69  | 126.1(3)  | H10A_69-C10A_69-<br>H10B_69 | 109.5    |
| C3A_69-C2A_69-<br>C1A_69  | 107.8(3)  | C5A_69-C10A_69-<br>H10C_69  | 109.5    |
| C3A_69-C2A_69-<br>C7A_69  | 125.5(4)  | H10A_69-C10A_69-<br>H10C_69 | 109.5    |
| C1A_69-C2A_69-<br>C7A_69  | 126.5(4)  | H10B_69-C10A_69-<br>H10C_69 | 109.5    |
| C3A_69-C2A_69-<br>A11_69  | 72.04(19) | C4A_69-C9A_69-<br>H9AA_69   | 109.5    |
| C1A_69-C2A_69-<br>A11_69  | 71.4(2)   | C4A_69-C9A_69-<br>H9AB_69   | 109.5    |
| C7A_69-C2A_69-<br>A11_69  | 125.5(3)  | H9AA_69-C9A_69-<br>H9AB_69  | 109.5    |
| C4A_69-C3A_69-<br>C2A_69  | 109.1(3)  | C4A_69-C9A_69-<br>H9AC_69   | 109.5    |
| C4A_69-C3A_69-<br>C8A_69  | 125.6(4)  | H9AA_69-C9A_69-<br>H9AC_69  | 109.5    |
| C2A_69-C3A_69-<br>C8A_69  | 125.3(4)  | H9AB_69-C9A_69-<br>H9AC_69  | 109.5    |
| C4A_69-C3A_69-<br>A11_69  | 72.30(19) | C3A_69-C8A_69-<br>H8AA_69   | 109.5    |
| C2A_69-C3A_69-<br>A11_69  | 71.19(19) | C3A_69-C8A_69-<br>H8AB_69   | 109.5    |
| C8A_69-C3A_69-<br>A11_69  | 123.3(3)  | H8AA_69-C8A_69-<br>H8AB_69  | 109.5    |
| C3A_69-C4A_69-<br>C5A_69  | 107.9(3)  | C3A_69-C8A_69-<br>H8AC_69   | 109.5    |
| C3A_69-C4A_69-<br>C9A_69  | 125.4(4)  | H8AA_69-C8A_69-<br>H8AC_69  | 109.5    |
| C5A_69-C4A_69-<br>C9A_69  | 126.7(4)  | H8AB_69-C8A_69-<br>H8AC_69  | 109.5    |
| C3A_69-C4A_69-<br>A11_69  | 71.25(19) | C2A_69-C7A_69-<br>H7AA_69   | 109.5    |
| C5A_69-C4A_69-<br>A11_69  | 71.2(2)   | C2A_69-C7A_69-<br>H7AB_69   | 109.5    |
| C9A_69-C4A_69-<br>A11_69  | 123.7(3)  | H7AA_69-C7A_69-<br>H7AB_69  | 109.5    |
| C4A_69-C5A_69-<br>C1A_69  | 108.1(3)  | C2A_69-C7A_69-<br>H7AC_69   | 109.5    |
| C4A_69-C5A_69-<br>C10A_69 | 125.0(5)  | H7AA_69-C7A_69-<br>H7AC_69  | 109.5    |
| C1A_69-C5A_69-<br>C10A_69 | 126.9(5)  | H7AB_69-C7A_69-<br>H7AC_69  | 109.5    |
| C4A_69-C5A_69-<br>A11_69  | 72.2(2)   | C1A_69-C6A_69-<br>H6AA_69   | 109.5    |
| C1A_69-C5A_69-<br>A11_69  | 70.8(2)   | C1A_69-C6A_69-<br>H6AB_69   | 109.5    |

|                            |          |                             |          |
|----------------------------|----------|-----------------------------|----------|
| H6AA_69-C6A_69-<br>H6AB_69 | 109.5    | C9B_69-C4B_69-<br>A12_69    | 125.0(3) |
| C1A_69-C6A_69-<br>H6AC_69  | 109.5    | C1B_69-C5B_69-<br>C4B_69    | 108.7(3) |
| H6AA_69-C6A_69-<br>H6AC_69 | 109.5    | C1B_69-C5B_69-<br>C10B_69   | 124.6(5) |
| H6AB_69-C6A_69-<br>H6AC_69 | 109.5    | C4B_69-C5B_69-<br>C10B_69   | 126.4(5) |
| C5B_69-C1B_69-<br>C2B_69   | 106.9(4) | C1B_69-C5B_69-<br>A12_69    | 72.4(2)  |
| C5B_69-C1B_69-<br>C6B_69   | 126.2(4) | C4B_69-C5B_69-<br>A12_69    | 72.0(2)  |
| C2B_69-C1B_69-<br>C6B_69   | 126.7(4) | C10B_69-C5B_69-<br>A12_69   | 126.1(3) |
| C5B_69-C1B_69-<br>A12_69   | 70.4(2)  | C5B_69-C10B_69-<br>H10D_69  | 109.5    |
| C2B_69-C1B_69-<br>A12_69   | 71.9(2)  | C5B_69-C10B_69-<br>H10E_69  | 109.5    |
| C6B_69-C1B_69-<br>A12_69   | 126.8(3) | H10D_69-C10B_69-<br>H10E_69 | 109.5    |
| C3B_69-C2B_69-<br>C1B_69   | 109.2(4) | C5B_69-C10B_69-<br>H10F_69  | 109.5    |
| C3B_69-C2B_69-<br>C7B_69   | 124.5(4) | H10D_69-C10B_69-<br>H10F_69 | 109.5    |
| C1B_69-C2B_69-<br>C7B_69   | 126.2(4) | H10E_69-C10B_69-<br>H10F_69 | 109.5    |
| C3B_69-C2B_69-<br>A12_69   | 72.1(2)  | C4B_69-C9B_69-<br>H9BA_69   | 109.5    |
| C1B_69-C2B_69-<br>A12_69   | 70.9(2)  | C4B_69-C9B_69-<br>H9BB_69   | 109.5    |
| C7B_69-C2B_69-<br>A12_69   | 125.9(3) | H9BA_69-C9B_69-<br>H9BB_69  | 109.5    |
| C2B_69-C3B_69-<br>C4B_69   | 107.9(4) | C4B_69-C9B_69-<br>H9BC_69   | 109.5    |
| C2B_69-C3B_69-<br>C8B_69   | 125.3(4) | H9BA_69-C9B_69-<br>H9BC_69  | 109.5    |
| C4B_69-C3B_69-<br>C8B_69   | 126.7(5) | H9BB_69-C9B_69-<br>H9BC_69  | 109.5    |
| C2B_69-C3B_69-<br>A12_69   | 71.3(2)  | C3B_69-C8B_69-<br>H8BA_69   | 109.5    |
| C4B_69-C3B_69-<br>A12_69   | 70.6(2)  | C3B_69-C8B_69-<br>H8BB_69   | 109.5    |
| C8B_69-C3B_69-<br>A12_69   | 124.3(3) | H8BA_69-C8B_69-<br>H8BB_69  | 109.5    |
| C3B_69-C4B_69-<br>C5B_69   | 107.2(4) | C3B_69-C8B_69-<br>H8BC_69   | 109.5    |
| C3B_69-C4B_69-<br>C9B_69   | 126.5(5) | H8BA_69-C8B_69-<br>H8BC_69  | 109.5    |
| C5B_69-C4B_69-<br>C9B_69   | 126.3(5) | H8BB_69-C8B_69-<br>H8BC_69  | 109.5    |
| C3B_69-C4B_69-<br>A12_69   | 72.4(2)  | C2B_69-C7B_69-<br>H7BA_69   | 109.5    |
| C5B_69-C4B_69-<br>A12_69   | 70.0(2)  | C2B_69-C7B_69-<br>H7BB_69   | 109.5    |

|                            |          |                             |          |
|----------------------------|----------|-----------------------------|----------|
| H7BA_69-C7B_69-<br>H7BB_69 | 109.5    | C8C_69-C3C_69-<br>A13_69    | 126.5(3) |
| C2B_69-C7B_69-<br>H7BC_69  | 109.5    | C3C_69-C4C_69-<br>C5C_69    | 107.7(4) |
| H7BA_69-C7B_69-<br>H7BC_69 | 109.5    | C3C_69-C4C_69-<br>C9C_69    | 125.5(4) |
| H7BB_69-C7B_69-<br>H7BC_69 | 109.5    | C5C_69-C4C_69-<br>C9C_69    | 126.8(4) |
| C1B_69-C6B_69-<br>H6BA_69  | 109.5    | C3C_69-C4C_69-<br>A13_69    | 71.2(2)  |
| C1B_69-C6B_69-<br>H6BB_69  | 109.5    | C5C_69-C4C_69-<br>A13_69    | 71.1(2)  |
| H6BA_69-C6B_69-<br>H6BB_69 | 109.5    | C9C_69-C4C_69-<br>A13_69    | 123.9(3) |
| C1B_69-C6B_69-<br>H6BC_69  | 109.5    | C1C_69-C5C_69-<br>C4C_69    | 107.8(4) |
| H6BA_69-C6B_69-<br>H6BC_69 | 109.5    | C1C_69-C5C_69-<br>C10C_69   | 126.2(4) |
| H6BB_69-C6B_69-<br>H6BC_69 | 109.5    | C4C_69-C5C_69-<br>C10C_69   | 126.0(4) |
| C5C_69-C1C_69-<br>C2C_69   | 108.7(4) | C1C_69-C5C_69-<br>A13_69    | 71.1(2)  |
| C5C_69-C1C_69-<br>C6C_69   | 125.7(4) | C4C_69-C5C_69-<br>A13_69    | 71.6(2)  |
| C2C_69-C1C_69-<br>C6C_69   | 125.5(4) | C10C_69-C5C_69-<br>A13_69   | 122.5(3) |
| C5C_69-C1C_69-<br>A13_69   | 71.8(2)  | C5C_69-C10C_69-<br>H10G_69  | 109.5    |
| C2C_69-C1C_69-<br>A13_69   | 71.3(2)  | C5C_69-C10C_69-<br>H10H_69  | 109.5    |
| C6C_69-C1C_69-<br>A13_69   | 126.3(3) | H10G_69-C10C_69-<br>H10H_69 | 109.5    |
| C1C_69-C2C_69-<br>C3C_69   | 107.7(4) | C5C_69-C10C_69-<br>H10I_69  | 109.5    |
| C1C_69-C2C_69-<br>C7C_69   | 126.0(4) | H10G_69-C10C_69-<br>H10I_69 | 109.5    |
| C3C_69-C2C_69-<br>C7C_69   | 126.1(4) | H10H_69-C10C_69-<br>H10I_69 | 109.5    |
| C1C_69-C2C_69-<br>A13_69   | 71.4(2)  | C4C_69-C9C_69-<br>H9CA_69   | 109.5    |
| C3C_69-C2C_69-<br>A13_69   | 71.8(2)  | C4C_69-C9C_69-<br>H9CB_69   | 109.5    |
| C7C_69-C2C_69-<br>A13_69   | 126.0(3) | H9CA_69-C9C_69-<br>H9CB_69  | 109.5    |
| C2C_69-C3C_69-<br>C4C_69   | 108.1(4) | C4C_69-C9C_69-<br>H9CC_69   | 109.5    |
| C2C_69-C3C_69-<br>C8C_69   | 125.4(5) | H9CA_69-C9C_69-<br>H9CC_69  | 109.5    |
| C4C_69-C3C_69-<br>C8C_69   | 126.4(5) | H9CB_69-C9C_69-<br>H9CC_69  | 109.5    |
| C2C_69-C3C_69-<br>A13_69   | 70.8(2)  | C3C_69-C8C_69-<br>H8CA_69   | 109.5    |
| C4C_69-C3C_69-<br>A13_69   | 71.5(2)  | C3C_69-C8C_69-<br>H8CB_69   | 109.5    |

|                            |         |                          |           |
|----------------------------|---------|--------------------------|-----------|
| H8CA_69-C8C_69-<br>H8CB_69 | 109.5   | C4B_47-Al2_47-<br>C2B_47 | 62.0(7)   |
| C3C_69-C8C_69-<br>H8CC_69  | 109.5   | C3B_47-Al2_47-<br>C2B_47 | 37.1(4)   |
| H8CA_69-C8C_69-<br>H8CC_69 | 109.5   | C5B_47-Al2_47-<br>In1_47 | 159.4(13) |
| H8CB_69-C8C_69-<br>H8CC_69 | 109.5   | C1B_47-Al2_47-<br>In1_47 | 163.1(13) |
| C2C_69-C7C_69-<br>H7CA_69  | 109.5   | C4B_47-Al2_47-<br>In1_47 | 128.7(12) |
| C2C_69-C7C_69-<br>H7CB_69  | 109.5   | C3B_47-Al2_47-<br>In1_47 | 117.4(11) |
| H7CA_69-C7C_69-<br>H7CB_69 | 109.5   | C2B_47-Al2_47-<br>In1_47 | 131.8(12) |
| C2C_69-C7C_69-<br>H7CC_69  | 109.5   | C1C_47-Al3_47-<br>C2C_47 | 37.5(4)   |
| H7CA_69-C7C_69-<br>H7CC_69 | 109.5   | C1C_47-Al3_47-<br>C5C_47 | 37.5(4)   |
| H7CB_69-C7C_69-<br>H7CC_69 | 109.5   | C2C_47-Al3_47-<br>C5C_47 | 62.6(7)   |
| C1C_69-C6C_69-<br>H6CA_69  | 109.5   | C1C_47-Al3_47-<br>C4C_47 | 61.7(7)   |
| C1C_69-C6C_69-<br>H6CB_69  | 109.5   | C2C_47-Al3_47-<br>C4C_47 | 61.4(7)   |
| H6CA_69-C6C_69-<br>H6CB_69 | 109.5   | C5C_47-Al3_47-<br>C4C_47 | 37.2(4)   |
| C1C_69-C6C_69-<br>H6CC_69  | 109.5   | C1C_47-Al3_47-<br>C3C_47 | 62.4(7)   |
| H6CA_69-C6C_69-<br>H6CC_69 | 109.5   | C2C_47-Al3_47-<br>C3C_47 | 37.0(4)   |
| H6CB_69-C6C_69-<br>H6CC_69 | 109.5   | C5C_47-Al3_47-<br>C3C_47 | 62.7(7)   |
| Al3_47-In1_47-<br>Al2_47   | 67.3(7) | C4C_47-Al3_47-<br>C3C_47 | 37.0(4)   |
| Al3_47-In1_47-<br>Al1_47   | 67.7(7) | C1C_47-Al3_47-<br>In1_47 | 156.9(13) |
| Al2_47-In1_47-<br>Al1_47   | 67.3(7) | C2C_47-Al3_47-<br>In1_47 | 165.2(13) |
| C5B_47-Al2_47-<br>C1B_47   | 37.3(4) | C5C_47-Al3_47-<br>In1_47 | 126.4(12) |
| C5B_47-Al2_47-<br>C4B_47   | 37.8(4) | C4C_47-Al3_47-<br>In1_47 | 117.3(11) |
| C1B_47-Al2_47-<br>C4B_47   | 62.6(7) | C3C_47-Al3_47-<br>In1_47 | 132.6(12) |
| C5B_47-Al2_47-<br>C3B_47   | 62.6(7) | C2A_47-Al1_47-<br>C1A_47 | 37.3(4)   |
| C1B_47-Al2_47-<br>C3B_47   | 62.4(7) | C2A_47-Al1_47-<br>C3A_47 | 37.2(4)   |
| C4B_47-Al2_47-<br>C3B_47   | 37.3(4) | C1A_47-Al1_47-<br>C3A_47 | 62.0(7)   |
| C5B_47-Al2_47-<br>C2B_47   | 62.1(7) | C2A_47-Al1_47-<br>C4A_47 | 62.1(7)   |
| C1B_47-Al2_47-<br>C2B_47   | 37.2(4) | C1A_47-Al1_47-<br>C4A_47 | 61.9(7)   |

|                          |           |                             |           |
|--------------------------|-----------|-----------------------------|-----------|
| C3A_47-Al1_47-<br>C4A_47 | 36.9(4)   | C8A_47-C3A_47-<br>Al1_47    | 124(2)    |
| C2A_47-Al1_47-<br>C5A_47 | 62.2(7)   | C3A_47-C4A_47-<br>C5A_47    | 108.2(13) |
| C1A_47-Al1_47-<br>C5A_47 | 37.2(4)   | C3A_47-C4A_47-<br>C9A_47    | 127(2)    |
| C3A_47-Al1_47-<br>C5A_47 | 61.8(7)   | C5A_47-C4A_47-<br>C9A_47    | 125(2)    |
| C4A_47-Al1_47-<br>C5A_47 | 36.9(4)   | C3A_47-C4A_47-<br>Al1_47    | 71.2(8)   |
| C2A_47-Al1_47-<br>In1_47 | 171.7(12) | C5A_47-C4A_47-<br>Al1_47    | 71.8(8)   |
| C1A_47-Al1_47-<br>In1_47 | 150.4(11) | C9A_47-C4A_47-<br>Al1_47    | 121(2)    |
| C3A_47-Al1_47-<br>In1_47 | 136.5(11) | C4A_47-C5A_47-<br>C1A_47    | 107.6(13) |
| C4A_47-Al1_47-<br>In1_47 | 116.4(10) | C4A_47-C5A_47-<br>C10A_47   | 124(2)    |
| C5A_47-Al1_47-<br>In1_47 | 122.1(10) | C1A_47-C5A_47-<br>C10A_47   | 129(2)    |
| C2A_47-C1A_47-<br>C5A_47 | 108.2(13) | C4A_47-C5A_47-<br>Al1_47    | 71.3(8)   |
| C2A_47-C1A_47-<br>C6A_47 | 125(2)    | C1A_47-C5A_47-<br>Al1_47    | 70.7(8)   |
| C5A_47-C1A_47-<br>C6A_47 | 127(2)    | C10A_47-C5A_47-<br>Al1_47   | 120(2)    |
| C2A_47-C1A_47-<br>Al1_47 | 71.2(8)   | C5A_47-C10A_47-<br>H10A_47  | 109.5     |
| C5A_47-C1A_47-<br>Al1_47 | 72.1(8)   | C5A_47-C10A_47-<br>H10B_47  | 109.5     |
| C6A_47-C1A_47-<br>Al1_47 | 127(2)    | H10A_47-C10A_47-<br>H10B_47 | 109.5     |
| C3A_47-C2A_47-<br>C1A_47 | 107.5(13) | C5A_47-C10A_47-<br>H10C_47  | 109.5     |
| C3A_47-C2A_47-<br>C7A_47 | 126(2)    | H10A_47-C10A_47-<br>H10C_47 | 109.5     |
| C1A_47-C2A_47-<br>C7A_47 | 126(2)    | H10B_47-C10A_47-<br>H10C_47 | 109.5     |
| C3A_47-C2A_47-<br>Al1_47 | 71.6(8)   | C4A_47-C9A_47-<br>H9AA_47   | 109.5     |
| C1A_47-C2A_47-<br>Al1_47 | 71.4(8)   | C4A_47-C9A_47-<br>H9AB_47   | 109.5     |
| C7A_47-C2A_47-<br>Al1_47 | 123(2)    | H9AA_47-C9A_47-<br>H9AB_47  | 109.5     |
| C4A_47-C3A_47-<br>C2A_47 | 108.4(13) | C4A_47-C9A_47-<br>H9AC_47   | 109.5     |
| C4A_47-C3A_47-<br>C8A_47 | 128(2)    | H9AA_47-C9A_47-<br>H9AC_47  | 109.5     |
| C2A_47-C3A_47-<br>C8A_47 | 124(2)    | H9AB_47-C9A_47-<br>H9AC_47  | 109.5     |
| C4A_47-C3A_47-<br>Al1_47 | 71.8(8)   | C3A_47-C8A_47-<br>H8AA_47   | 109.5     |
| C2A_47-C3A_47-<br>Al1_47 | 71.2(8)   | C3A_47-C8A_47-<br>H8AB_47   | 109.5     |

|                            |           |                             |           |
|----------------------------|-----------|-----------------------------|-----------|
| H8AA_47-C8A_47-<br>H8AB_47 | 109.5     | C7B_47-C2B_47-<br>A12_47    | 122(2)    |
| C3A_47-C8A_47-<br>H8AC_47  | 109.5     | C2B_47-C3B_47-<br>C4B_47    | 107.8(13) |
| H8AA_47-C8A_47-<br>H8AC_47 | 109.5     | C2B_47-C3B_47-<br>C8B_47    | 125(2)    |
| H8AB_47-C8A_47-<br>H8AC_47 | 109.5     | C4B_47-C3B_47-<br>C8B_47    | 127(2)    |
| C2A_47-C7A_47-<br>H7AA_47  | 109.5     | C2B_47-C3B_47-<br>A12_47    | 71.5(8)   |
| C2A_47-C7A_47-<br>H7AB_47  | 109.5     | C4B_47-C3B_47-<br>A12_47    | 71.1(8)   |
| H7AA_47-C7A_47-<br>H7AB_47 | 109.5     | C8B_47-C3B_47-<br>A12_47    | 122(2)    |
| C2A_47-C7A_47-<br>H7AC_47  | 109.5     | C3B_47-C4B_47-<br>C5B_47    | 107.6(13) |
| H7AA_47-C7A_47-<br>H7AC_47 | 109.5     | C3B_47-C4B_47-<br>C9B_47    | 127(2)    |
| H7AB_47-C7A_47-<br>H7AC_47 | 109.5     | C5B_47-C4B_47-<br>C9B_47    | 125(2)    |
| C1A_47-C6A_47-<br>H6AA_47  | 109.5     | C3B_47-C4B_47-<br>A12_47    | 71.7(8)   |
| C1A_47-C6A_47-<br>H6AB_47  | 109.5     | C5B_47-C4B_47-<br>A12_47    | 70.6(8)   |
| H6AA_47-C6A_47-<br>H6AB_47 | 109.5     | C9B_47-C4B_47-<br>A12_47    | 124(2)    |
| C1A_47-C6A_47-<br>H6AC_47  | 109.5     | C1B_47-C5B_47-<br>C4B_47    | 108.2(13) |
| H6AA_47-C6A_47-<br>H6AC_47 | 109.5     | C1B_47-C5B_47-<br>C10B_47   | 127(2)    |
| H6AB_47-C6A_47-<br>H6AC_47 | 109.5     | C4B_47-C5B_47-<br>C10B_47   | 124(2)    |
| C5B_47-C1B_47-<br>C2B_47   | 107.7(13) | C1B_47-C5B_47-<br>A12_47    | 71.8(8)   |
| C5B_47-C1B_47-<br>C6B_47   | 126(2)    | C4B_47-C5B_47-<br>A12_47    | 71.6(8)   |
| C2B_47-C1B_47-<br>C6B_47   | 127(2)    | C10B_47-C5B_47-<br>A12_47   | 124(2)    |
| C5B_47-C1B_47-<br>A12_47   | 70.9(8)   | C5B_47-C10B_47-<br>H10D_47  | 109.5     |
| C2B_47-C1B_47-<br>A12_47   | 71.8(8)   | C5B_47-C10B_47-<br>H10E_47  | 109.5     |
| C6B_47-C1B_47-<br>A12_47   | 123(2)    | H10D_47-C10B_47-<br>H10E_47 | 109.5     |
| C3B_47-C2B_47-<br>C1B_47   | 108.8(13) | C5B_47-C10B_47-<br>H10F_47  | 109.5     |
| C3B_47-C2B_47-<br>C7B_47   | 126(2)    | H10D_47-C10B_47-<br>H10F_47 | 109.5     |
| C1B_47-C2B_47-<br>C7B_47   | 125(2)    | H10E_47-C10B_47-<br>H10F_47 | 109.5     |
| C3B_47-C2B_47-<br>A12_47   | 71.4(8)   | C4B_47-C9B_47-<br>H9BA_47   | 109.5     |
| C1B_47-C2B_47-<br>A12_47   | 71.0(8)   | C4B_47-C9B_47-<br>H9BB_47   | 109.5     |

|                            |           |                            |           |
|----------------------------|-----------|----------------------------|-----------|
| H9BA_47-C9B_47-<br>H9BB_47 | 109.5     | C6C_47-C1C_47-<br>A13_47   | 126(2)    |
| C4B_47-C9B_47-<br>H9BC_47  | 109.5     | C3C_47-C2C_47-<br>C1C_47   | 108.7(14) |
| H9BA_47-C9B_47-<br>H9BC_47 | 109.5     | C3C_47-C2C_47-<br>C7C_47   | 126(2)    |
| H9BB_47-C9B_47-<br>H9BC_47 | 109.5     | C1C_47-C2C_47-<br>C7C_47   | 125(2)    |
| C3B_47-C8B_47-<br>H8BA_47  | 109.5     | C3C_47-C2C_47-<br>A13_47   | 72.3(8)   |
| C3B_47-C8B_47-<br>H8BB_47  | 109.5     | C1C_47-C2C_47-<br>A13_47   | 71.1(8)   |
| H8BA_47-C8B_47-<br>H8BB_47 | 109.5     | C7C_47-C2C_47-<br>A13_47   | 126(2)    |
| C3B_47-C8B_47-<br>H8BC_47  | 109.5     | C2C_47-C3C_47-<br>C4C_47   | 106.9(13) |
| H8BA_47-C8B_47-<br>H8BC_47 | 109.5     | C2C_47-C3C_47-<br>C8C_47   | 128(2)    |
| H8BB_47-C8B_47-<br>H8BC_47 | 109.5     | C4C_47-C3C_47-<br>C8C_47   | 125(2)    |
| C2B_47-C7B_47-<br>H7BA_47  | 109.5     | C2C_47-C3C_47-<br>A13_47   | 70.7(8)   |
| C2B_47-C7B_47-<br>H7BB_47  | 109.5     | C4C_47-C3C_47-<br>A13_47   | 71.4(8)   |
| H7BA_47-C7B_47-<br>H7BB_47 | 109.5     | C8C_47-C3C_47-<br>A13_47   | 122(2)    |
| C2B_47-C7B_47-<br>H7BC_47  | 109.5     | C5C_47-C4C_47-<br>C3C_47   | 109.7(13) |
| H7BA_47-C7B_47-<br>H7BC_47 | 109.5     | C5C_47-C4C_47-<br>C9C_47   | 125(2)    |
| H7BB_47-C7B_47-<br>H7BC_47 | 109.5     | C3C_47-C4C_47-<br>C9C_47   | 125(2)    |
| C1B_47-C6B_47-<br>H6BA_47  | 109.5     | C5C_47-C4C_47-<br>A13_47   | 71.0(8)   |
| C1B_47-C6B_47-<br>H6BB_47  | 109.5     | C3C_47-C4C_47-<br>A13_47   | 71.6(8)   |
| H6BA_47-C6B_47-<br>H6BB_47 | 109.5     | C9C_47-C4C_47-<br>A13_47   | 129(2)    |
| C1B_47-C6B_47-<br>H6BC_47  | 109.5     | C4C_47-C5C_47-<br>C1C_47   | 106.4(13) |
| H6BA_47-C6B_47-<br>H6BC_47 | 109.5     | C4C_47-C5C_47-<br>C10C_47  | 126(2)    |
| H6BB_47-C6B_47-<br>H6BC_47 | 109.5     | C1C_47-C5C_47-<br>C10C_47  | 127(2)    |
| C2C_47-C1C_47-<br>C5C_47   | 108.2(14) | C4C_47-C5C_47-<br>A13_47   | 71.8(8)   |
| C2C_47-C1C_47-<br>C6C_47   | 127(2)    | C1C_47-C5C_47-<br>A13_47   | 70.8(8)   |
| C5C_47-C1C_47-<br>C6C_47   | 125(2)    | C10C_47-C5C_47-<br>A13_47  | 122(2)    |
| C2C_47-C1C_47-<br>A13_47   | 71.4(8)   | C5C_47-C10C_47-<br>H10G_47 | 109.5     |
| C5C_47-C1C_47-<br>A13_47   | 71.7(8)   | C5C_47-C10C_47-<br>H10H_47 | 109.5     |

|                             |       |                            |           |
|-----------------------------|-------|----------------------------|-----------|
| H10G_47-C10C_47-<br>H10H_47 | 109.5 | H6CB_47-C6C_47-<br>H6CC_47 | 109.5     |
| C5C_47-C10C_47-<br>H10I_47  | 109.5 | Al3_48-In1_48-<br>Al2_48   | 67.4(6)   |
| H10G_47-C10C_47-<br>H10I_47 | 109.5 | Al3_48-In1_48-<br>Al1_48   | 68.5(5)   |
| H10H_47-C10C_47-<br>H10I_47 | 109.5 | Al2_48-In1_48-<br>Al1_48   | 67.1(6)   |
| C4C_47-C9C_47-<br>H9CA_47   | 109.5 | C5B_48-Al2_48-<br>C1B_48   | 37.3(4)   |
| C4C_47-C9C_47-<br>H9CB_47   | 109.5 | C5B_48-Al2_48-<br>C2B_48   | 62.6(7)   |
| H9CA_47-C9C_47-<br>H9CB_47  | 109.5 | C1B_48-Al2_48-<br>C2B_48   | 37.3(4)   |
| C4C_47-C9C_47-<br>H9CC_47   | 109.5 | C5B_48-Al2_48-<br>C3B_48   | 63.1(7)   |
| H9CA_47-C9C_47-<br>H9CC_47  | 109.5 | C1B_48-Al2_48-<br>C3B_48   | 62.4(7)   |
| H9CB_47-C9C_47-<br>H9CC_47  | 109.5 | C2B_48-Al2_48-<br>C3B_48   | 37.1(4)   |
| C3C_47-C8C_47-<br>H8CA_47   | 109.5 | C5B_48-Al2_48-<br>C4B_48   | 37.7(4)   |
| C3C_47-C8C_47-<br>H8CB_47   | 109.5 | C1B_48-Al2_48-<br>C4B_48   | 62.2(7)   |
| H8CA_47-C8C_47-<br>H8CB_47  | 109.5 | C2B_48-Al2_48-<br>C4B_48   | 62.1(7)   |
| C3C_47-C8C_47-<br>H8CC_47   | 109.5 | C3B_48-Al2_48-<br>C4B_48   | 37.5(4)   |
| H8CA_47-C8C_47-<br>H8CC_47  | 109.5 | C5B_48-Al2_48-<br>In1_48   | 155.3(12) |
| H8CB_47-C8C_47-<br>H8CC_47  | 109.5 | C1B_48-Al2_48-<br>In1_48   | 167.4(12) |
| C2C_47-C7C_47-<br>H7CA_47   | 109.5 | C2B_48-Al2_48-<br>In1_48   | 135.7(12) |
| C2C_47-C7C_47-<br>H7CB_47   | 109.5 | C3B_48-Al2_48-<br>In1_48   | 119.0(12) |
| H7CA_47-C7C_47-<br>H7CB_47  | 109.5 | C4B_48-Al2_48-<br>In1_48   | 127.4(11) |
| C2C_47-C7C_47-<br>H7CC_47   | 109.5 | C1C_48-Al3_48-<br>C2C_48   | 37.2(4)   |
| H7CA_47-C7C_47-<br>H7CC_47  | 109.5 | C1C_48-Al3_48-<br>C5C_48   | 37.2(4)   |
| H7CB_47-C7C_47-<br>H7CC_47  | 109.5 | C2C_48-Al3_48-<br>C5C_48   | 61.4(7)   |
| C1C_47-C6C_47-<br>H6CA_47   | 109.5 | C1C_48-Al3_48-<br>C3C_48   | 61.8(7)   |
| C1C_47-C6C_47-<br>H6CB_47   | 109.5 | C2C_48-Al3_48-<br>C3C_48   | 36.3(4)   |
| H6CA_47-C6C_47-<br>H6CB_47  | 109.5 | C5C_48-Al3_48-<br>C3C_48   | 61.6(6)   |
| C1C_47-C6C_47-<br>H6CC_47   | 109.5 | C1C_48-Al3_48-<br>C4C_48   | 61.2(7)   |
| H6CA_47-C6C_47-<br>H6CC_47  | 109.5 | C2C_48-Al3_48-<br>C4C_48   | 60.4(6)   |



|                          |           |                            |           |
|--------------------------|-----------|----------------------------|-----------|
| C5C_48-Al3_48-<br>C4C_48 | 36.5(4)   | C6A_48-C1A_48-<br>Al1_48   | 125(2)    |
| C3C_48-Al3_48-<br>C4C_48 | 36.4(4)   | C3A_48-C2A_48-<br>C1A_48   | 107.5(13) |
| C1C_48-Al3_48-<br>In1_48 | 158.2(8)  | C3A_48-C2A_48-<br>C7A_48   | 126(2)    |
| C2C_48-Al3_48-<br>In1_48 | 160.6(8)  | C1A_48-C2A_48-<br>C7A_48   | 127(2)    |
| C5C_48-Al3_48-<br>In1_48 | 124.5(8)  | C3A_48-C2A_48-<br>Al1_48   | 71.0(8)   |
| C3C_48-Al3_48-<br>In1_48 | 126.5(7)  | C1A_48-C2A_48-<br>Al1_48   | 71.2(8)   |
| C4C_48-Al3_48-<br>In1_48 | 112.0(7)  | C7A_48-C2A_48-<br>Al1_48   | 123(2)    |
| C3A_48-Al1_48-<br>C4A_48 | 37.2(4)   | C4A_48-C3A_48-<br>C2A_48   | 108.8(13) |
| C3A_48-Al1_48-<br>C1A_48 | 62.3(7)   | C4A_48-C3A_48-<br>C8A_48   | 129(2)    |
| C4A_48-Al1_48-<br>C1A_48 | 62.5(7)   | C2A_48-C3A_48-<br>C8A_48   | 122(2)    |
| C3A_48-Al1_48-<br>C2A_48 | 37.3(4)   | C4A_48-C3A_48-<br>Al1_48   | 71.6(8)   |
| C4A_48-Al1_48-<br>C2A_48 | 62.4(7)   | C2A_48-C3A_48-<br>Al1_48   | 71.7(8)   |
| C1A_48-Al1_48-<br>C2A_48 | 37.4(4)   | C8A_48-C3A_48-<br>Al1_48   | 127(2)    |
| C3A_48-Al1_48-<br>C5A_48 | 61.5(7)   | C5A_48-C4A_48-<br>C3A_48   | 107.5(13) |
| C4A_48-Al1_48-<br>C5A_48 | 36.9(4)   | C5A_48-C4A_48-<br>C9A_48   | 126(2)    |
| C1A_48-Al1_48-<br>C5A_48 | 37.1(4)   | C3A_48-C4A_48-<br>C9A_48   | 127(2)    |
| C2A_48-Al1_48-<br>C5A_48 | 61.8(7)   | C5A_48-C4A_48-<br>Al1_48   | 72.5(8)   |
| C3A_48-Al1_48-<br>In1_48 | 140.4(10) | C3A_48-C4A_48-<br>Al1_48   | 71.2(8)   |
| C4A_48-Al1_48-<br>In1_48 | 120.0(9)  | C9A_48-C4A_48-<br>Al1_48   | 122(2)    |
| C1A_48-Al1_48-<br>In1_48 | 149.4(9)  | C4A_48-C5A_48-<br>C1A_48   | 108.5(13) |
| C2A_48-Al1_48-<br>In1_48 | 173.1(9)  | C4A_48-C5A_48-<br>C10A_48  | 124(2)    |
| C5A_48-Al1_48-<br>In1_48 | 124.4(9)  | C1A_48-C5A_48-<br>C10A_48  | 128(2)    |
| C5A_48-C1A_48-<br>C2A_48 | 107.6(13) | C4A_48-C5A_48-<br>Al1_48   | 70.5(8)   |
| C5A_48-C1A_48-<br>C6A_48 | 127(2)    | C1A_48-C5A_48-<br>Al1_48   | 70.4(8)   |
| C2A_48-C1A_48-<br>C6A_48 | 125(2)    | C10A_48-C5A_48-<br>Al1_48  | 123(2)    |
| C5A_48-C1A_48-<br>Al1_48 | 72.5(8)   | C5A_48-C10A_48-<br>H10A_48 | 109.5     |
| C2A_48-C1A_48-<br>Al1_48 | 71.5(8)   | C5A_48-C10A_48-<br>H10B_48 | 109.5     |

|                             |       |                            |           |
|-----------------------------|-------|----------------------------|-----------|
| H10A_48-C10A_48-<br>H10B_48 | 109.5 | H6AB_48-C6A_48-<br>H6AC_48 | 109.5     |
| C5A_48-C10A_48-<br>H10C_48  | 109.5 | C5B_48-C1B_48-<br>C2B_48   | 108.6(13) |
| H10A_48-C10A_48-<br>H10C_48 | 109.5 | C5B_48-C1B_48-<br>C6B_48   | 126.9(19) |
| H10B_48-C10A_48-<br>H10C_48 | 109.5 | C2B_48-C1B_48-<br>C6B_48   | 124.4(19) |
| C4A_48-C9A_48-<br>H9AA_48   | 109.5 | C5B_48-C1B_48-<br>A12_48   | 71.2(8)   |
| C4A_48-C9A_48-<br>H9AB_48   | 109.5 | C2B_48-C1B_48-<br>A12_48   | 71.5(8)   |
| H9AA_48-C9A_48-<br>H9AB_48  | 109.5 | C6B_48-C1B_48-<br>A12_48   | 127(2)    |
| C4A_48-C9A_48-<br>H9AC_48   | 109.5 | C3B_48-C2B_48-<br>C1B_48   | 108.6(13) |
| H9AA_48-C9A_48-<br>H9AC_48  | 109.5 | C3B_48-C2B_48-<br>C7B_48   | 126(2)    |
| H9AB_48-C9A_48-<br>H9AC_48  | 109.5 | C1B_48-C2B_48-<br>C7B_48   | 125(2)    |
| C3A_48-C8A_48-<br>H8AA_48   | 109.5 | C3B_48-C2B_48-<br>A12_48   | 71.6(8)   |
| C3A_48-C8A_48-<br>H8AB_48   | 109.5 | C1B_48-C2B_48-<br>A12_48   | 71.2(8)   |
| H8AA_48-C8A_48-<br>H8AB_48  | 109.5 | C7B_48-C2B_48-<br>A12_48   | 125(2)    |
| C3A_48-C8A_48-<br>H8AC_48   | 109.5 | C2B_48-C3B_48-<br>C4B_48   | 107.6(13) |
| H8AA_48-C8A_48-<br>H8AC_48  | 109.5 | C2B_48-C3B_48-<br>C8B_48   | 126(2)    |
| H8AB_48-C8A_48-<br>H8AC_48  | 109.5 | C4B_48-C3B_48-<br>C8B_48   | 126(2)    |
| C2A_48-C7A_48-<br>H7AA_48   | 109.5 | C2B_48-C3B_48-<br>A12_48   | 71.3(8)   |
| C2A_48-C7A_48-<br>H7AB_48   | 109.5 | C4B_48-C3B_48-<br>A12_48   | 71.4(8)   |
| H7AA_48-C7A_48-<br>H7AB_48  | 109.5 | C8B_48-C3B_48-<br>A12_48   | 126(2)    |
| C2A_48-C7A_48-<br>H7AC_48   | 109.5 | C3B_48-C4B_48-<br>C5B_48   | 108.0(13) |
| H7AA_48-C7A_48-<br>H7AC_48  | 109.5 | C3B_48-C4B_48-<br>C9B_48   | 124(2)    |
| H7AB_48-C7A_48-<br>H7AC_48  | 109.5 | C5B_48-C4B_48-<br>C9B_48   | 128(2)    |
| C1A_48-C6A_48-<br>H6AA_48   | 109.5 | C3B_48-C4B_48-<br>A12_48   | 71.0(8)   |
| C1A_48-C6A_48-<br>H6AB_48   | 109.5 | C5B_48-C4B_48-<br>A12_48   | 70.5(8)   |
| H6AA_48-C6A_48-<br>H6AB_48  | 109.5 | C9B_48-C4B_48-<br>A12_48   | 122(2)    |
| C1A_48-C6A_48-<br>H6AC_48   | 109.5 | C1B_48-C5B_48-<br>C4B_48   | 107.3(13) |
| H6AA_48-C6A_48-<br>H6AC_48  | 109.5 | C1B_48-C5B_48-<br>C10B_48  | 128(2)    |

|                             |         |                            |           |
|-----------------------------|---------|----------------------------|-----------|
| C4B_48-C5B_48-<br>C10B_48   | 125(2)  | H7BB_48-C7B_48-<br>H7BC_48 | 109.5     |
| C1B_48-C5B_48-<br>A12_48    | 71.4(8) | C1B_48-C6B_48-<br>H6BA_48  | 109.5     |
| C4B_48-C5B_48-<br>A12_48    | 71.7(8) | C1B_48-C6B_48-<br>H6BB_48  | 109.5     |
| C10B_48-C5B_48-<br>A12_48   | 123(2)  | H6BA_48-C6B_48-<br>H6BB_48 | 109.5     |
| C5B_48-C10B_48-<br>H10D_48  | 109.5   | C1B_48-C6B_48-<br>H6BC_48  | 109.5     |
| C5B_48-C10B_48-<br>H10E_48  | 109.5   | H6BA_48-C6B_48-<br>H6BC_48 | 109.5     |
| H10D_48-C10B_48-<br>H10E_48 | 109.5   | H6BB_48-C6B_48-<br>H6BC_48 | 109.5     |
| C5B_48-C10B_48-<br>H10F_48  | 109.5   | C2C_48-C1C_48-<br>C5C_48   | 107.2(13) |
| H10D_48-C10B_48-<br>H10F_48 | 109.5   | C2C_48-C1C_48-<br>C6C_48   | 126(2)    |
| H10E_48-C10B_48-<br>H10F_48 | 109.5   | C5C_48-C1C_48-<br>C6C_48   | 126(2)    |
| C4B_48-C9B_48-<br>H9BA_48   | 109.5   | C2C_48-C1C_48-<br>A13_48   | 72.0(8)   |
| C4B_48-C9B_48-<br>H9BB_48   | 109.5   | C5C_48-C1C_48-<br>A13_48   | 72.4(8)   |
| H9BA_48-C9B_48-<br>H9BB_48  | 109.5   | C6C_48-C1C_48-<br>A13_48   | 125(2)    |
| C4B_48-C9B_48-<br>H9BC_48   | 109.5   | C3C_48-C2C_48-<br>C1C_48   | 109.4(13) |
| H9BA_48-C9B_48-<br>H9BC_48  | 109.5   | C3C_48-C2C_48-<br>C7C_48   | 126.0(19) |
| H9BB_48-C9B_48-<br>H9BC_48  | 109.5   | C1C_48-C2C_48-<br>C7C_48   | 124.4(19) |
| C3B_48-C8B_48-<br>H8BA_48   | 109.5   | C3C_48-C2C_48-<br>A13_48   | 72.8(8)   |
| C3B_48-C8B_48-<br>H8BB_48   | 109.5   | C1C_48-C2C_48-<br>A13_48   | 70.8(8)   |
| H8BA_48-C8B_48-<br>H8BB_48  | 109.5   | C7C_48-C2C_48-<br>A13_48   | 127(2)    |
| C3B_48-C8B_48-<br>H8BC_48   | 109.5   | C2C_48-C3C_48-<br>C4C_48   | 107.0(13) |
| H8BA_48-C8B_48-<br>H8BC_48  | 109.5   | C2C_48-C3C_48-<br>C8C_48   | 129(2)    |
| H8BB_48-C8B_48-<br>H8BC_48  | 109.5   | C4C_48-C3C_48-<br>C8C_48   | 123.6(19) |
| C2B_48-C7B_48-<br>H7BA_48   | 109.5   | C2C_48-C3C_48-<br>A13_48   | 70.8(8)   |
| C2B_48-C7B_48-<br>H7BB_48   | 109.5   | C4C_48-C3C_48-<br>A13_48   | 72.1(8)   |
| H7BA_48-C7B_48-<br>H7BB_48  | 109.5   | C8C_48-C3C_48-<br>A13_48   | 120.2(18) |
| C2B_48-C7B_48-<br>H7BC_48   | 109.5   | C5C_48-C4C_48-<br>C3C_48   | 109.1(12) |
| H7BA_48-C7B_48-<br>H7BC_48  | 109.5   | C5C_48-C4C_48-<br>C9C_48   | 128.0(19) |

|                             |           |                            |           |
|-----------------------------|-----------|----------------------------|-----------|
| C3C_48-C4C_48-<br>C9C_48    | 122.8(18) | H8CB_48-C8C_48-<br>H8CC_48 | 109.5     |
| C5C_48-C4C_48-<br>A13_48    | 70.8(8)   | C2C_48-C7C_48-<br>H7CA_48  | 109.5     |
| C3C_48-C4C_48-<br>A13_48    | 71.5(8)   | C2C_48-C7C_48-<br>H7CB_48  | 109.5     |
| C9C_48-C4C_48-<br>A13_48    | 124.4(18) | H7CA_48-C7C_48-<br>H7CB_48 | 109.5     |
| C4C_48-C5C_48-<br>C1C_48    | 107.4(13) | C2C_48-C7C_48-<br>H7CC_48  | 109.5     |
| C4C_48-C5C_48-<br>C10C_48   | 126.2(19) | H7CA_48-C7C_48-<br>H7CC_48 | 109.5     |
| C1C_48-C5C_48-<br>C10C_48   | 126.2(19) | H7CB_48-C7C_48-<br>H7CC_48 | 109.5     |
| C4C_48-C5C_48-<br>A13_48    | 72.7(8)   | C1C_48-C6C_48-<br>H6CA_48  | 109.5     |
| C1C_48-C5C_48-<br>A13_48    | 70.4(8)   | C1C_48-C6C_48-<br>H6CB_48  | 109.5     |
| C10C_48-C5C_48-<br>A13_48   | 126(2)    | H6CA_48-C6C_48-<br>H6CB_48 | 109.5     |
| C5C_48-C10C_48-<br>H10G_48  | 109.5     | C1C_48-C6C_48-<br>H6CC_48  | 109.5     |
| C5C_48-C10C_48-<br>H10H_48  | 109.5     | H6CA_48-C6C_48-<br>H6CC_48 | 109.5     |
| H10G_48-C10C_48-<br>H10H_48 | 109.5     | H6CB_48-C6C_48-<br>H6CC_48 | 109.5     |
| C5C_48-C10C_48-<br>H10I_48  | 109.5     | C2_49-C1_49-C5_49          | 108.1(9)  |
| H10G_48-C10C_48-<br>H10I_48 | 109.5     | C2_49-C1_49-C10_49         | 125.3(12) |
| H10H_48-C10C_48-<br>H10I_48 | 109.5     | C5_49-C1_49-C10_49         | 126.6(12) |
| C4C_48-C9C_48-<br>H9CA_48   | 109.5     | C2_49-C1_49-A11            | 68.3(5)   |
| C4C_48-C9C_48-<br>H9CB_48   | 109.5     | C5_49-C1_49-A11            | 71.7(7)   |
| H9CA_48-C9C_48-<br>H9CB_48  | 109.5     | C10_49-C1_49-A11           | 126.8(8)  |
| C4C_48-C9C_48-<br>H9CC_48   | 109.5     | C3_49-C2_49-C1_49          | 109.2(9)  |
| H9CA_48-C9C_48-<br>H9CC_48  | 109.5     | C3_49-C2_49-C9_49          | 127.2(13) |
| H9CB_48-C9C_48-<br>H9CC_48  | 109.5     | C1_49-C2_49-C9_49          | 123.6(13) |
| C3C_48-C8C_48-<br>H8CA_48   | 109.5     | C3_49-C2_49-A11            | 68.6(5)   |
| C3C_48-C8C_48-<br>H8CB_48   | 109.5     | C1_49-C2_49-A11            | 77.2(5)   |
| H8CA_48-C8C_48-<br>H8CB_48  | 109.5     | C9_49-C2_49-A11            | 121.9(9)  |
| C3C_48-C8C_48-<br>H8CC_48   | 109.5     | C2_49-C3_49-C4_49          | 107.0(9)  |
| H8CA_48-C8C_48-<br>H8CB_48  | 109.5     | C2_49-C3_49-C8_49          | 126.9(14) |
| C3C_48-C8C_48-<br>H8CC_48   | 109.5     | C4_49-C3_49-C8_49          | 126.0(14) |
| H8CA_48-C8C_48-<br>H8CC_48  | 109.5     | C2_49-C3_49-A11            | 75.6(6)   |
|                             |           | C4_49-C3_49-A11            | 71.7(11)  |
|                             |           | C8_49-C3_49-A11            | 121.0(9)  |
|                             |           | C3_49-C4_49-C5_49          | 108.6(9)  |
|                             |           | C3_49-C4_49-C7_49          | 127.7(13) |
|                             |           | C5_49-C4_49-C7_49          | 123.3(13) |
|                             |           | C3_49-C4_49-A11            | 71.2(9)   |
|                             |           | C5_49-C4_49-A11            | 78.4(11)  |
|                             |           | C7_49-C4_49-A11            | 122.3(15) |
|                             |           | C1_49-C5_49-C4_49          | 107.0(9)  |
|                             |           | C1_49-C5_49-C6_49          | 123.7(12) |
|                             |           | C4_49-C5_49-C6_49          | 129.2(12) |
|                             |           | C1_49-C5_49-A11            | 74.3(7)   |
|                             |           | C4_49-C5_49-A11            | 66.0(11)  |

|                    |           |                   |           |
|--------------------|-----------|-------------------|-----------|
| C6_49-C5_49-A11    | 128.3(11) | C4_50-C1_50-C3_50 | 107.4(11) |
| C5_49-C6_49-H6A_49 | 109.5     | F3_50-C2_50-F2_50 | 109.0(14) |
| C5_49-C6_49-H6B_49 | 109.5     | F3_50-C2_50-F1_50 | 109.0(17) |
| H6A_49-C6_49-      |           | F2_50-C2_50-F1_50 | 109.0(15) |
| H6B_49             | 109.5     | F3_50-C2_50-C1_50 | 109.6(12) |
| C5_49-C6_49-H6C_49 | 109.5     | F2_50-C2_50-C1_50 | 112.0(12) |
| H6A_49-C6_49-      |           | F1_50-C2_50-C1_50 | 108.2(14) |
| H6C_49             | 109.5     | F4_50-C3_50-F5_50 | 108.2(16) |
| H6B_49-C6_49-      |           | F4_50-C3_50-F6_50 | 108.8(14) |
| H6C_49             | 109.5     | F5_50-C3_50-F6_50 | 109.0(15) |
| C4_49-C7_49-H7A_49 | 109.5     | F4_50-C3_50-C1_50 | 112.5(12) |
| C4_49-C7_49-H7B_49 | 109.5     | F5_50-C3_50-C1_50 | 108.0(13) |
| H7A_49-C7_49-      |           | F6_50-C3_50-C1_50 | 110.2(12) |
| H7B_49             | 109.5     | F9_50-C4_50-F8_50 | 108.3(16) |
| C4_49-C7_49-H7C_49 | 109.5     | F9_50-C4_50-F7_50 | 111.0(19) |
| H7A_49-C7_49-      |           | F8_50-C4_50-F7_50 | 109.2(18) |
| H7C_49             | 109.5     | F9_50-C4_50-C1_50 | 111.6(15) |
| H7B_49-C7_49-      |           | F8_50-C4_50-C1_50 | 111.3(15) |
| H7C_49             | 109.5     | F7_50-C4_50-C1_50 | 105.4(13) |
| C3_49-C8_49-H8A_49 | 109.5     | C1_22-O1_22-A118  | 146.6(7)  |
| C3_49-C8_49-H8B_49 | 109.5     | O1_22-C1_22-C3_22 | 111.8(6)  |
| H8A_49-C8_49-      |           | O1_22-C1_22-C2_22 | 112.1(6)  |
| H8B_49             | 109.5     | C3_22-C1_22-C2_22 | 107.7(6)  |
| C3_49-C8_49-H8C_49 | 109.5     | O1_22-C1_22-C4_22 | 107.4(7)  |
| H8A_49-C8_49-      |           | C3_22-C1_22-C4_22 | 108.2(6)  |
| H8C_49             | 109.5     | C2_22-C1_22-C4_22 | 109.6(6)  |
| H8B_49-C8_49-      |           | F2_22-C2_22-F3_22 | 110.7(7)  |
| H8C_49             | 109.5     | F2_22-C2_22-F1_22 | 107.3(8)  |
| C2_49-C9_49-H9A_49 | 109.5     | F3_22-C2_22-F1_22 | 102.3(8)  |
| C2_49-C9_49-H9B_49 | 109.5     | F2_22-C2_22-C1_22 | 115.9(7)  |
| H9A_49-C9_49-      |           | F3_22-C2_22-C1_22 | 110.4(6)  |
| H9B_49             | 109.5     | F1_22-C2_22-C1_22 | 109.3(7)  |
| C2_49-C9_49-H9C_49 | 109.5     | F6_22-C3_22-F4_22 | 108.1(7)  |
| H9A_49-C9_49-      |           | F6_22-C3_22-F5_22 | 106.8(7)  |
| H9C_49             | 109.5     | F4_22-C3_22-F5_22 | 105.7(7)  |
| H9B_49-C9_49-      |           | F6_22-C3_22-C1_22 | 113.4(7)  |
| H9C_49             | 109.5     | F4_22-C3_22-C1_22 | 110.5(6)  |
| C1_49-C10_49-      |           | F5_22-C3_22-C1_22 | 112.0(7)  |
| H10A_49            | 109.5     | F9_22-C4_22-F8_22 | 111.2(9)  |
| C1_49-C10_49-      |           | F9_22-C4_22-F7_22 | 103.9(9)  |
| H10B_49            | 109.5     | F8_22-C4_22-F7_22 | 105.1(9)  |
| H10A_49-C10_49-    |           | F9_22-C4_22-C1_22 | 110.3(7)  |
| H10B_49            | 109.5     | F8_22-C4_22-C1_22 | 112.6(8)  |
| C1_49-C10_49-      |           | F7_22-C4_22-C1_22 | 113.3(8)  |
| H10C_49            | 109.5     | C1_51-O1_51-A118  | 139.5(13) |
| H10A_49-C10_49-    |           | O1_51-C1_51-C4_51 | 118.9(13) |
| H10C_49            | 109.5     | O1_51-C1_51-C3_51 | 106.0(11) |
| H10B_49-C10_49-    |           | C4_51-C1_51-C3_51 | 110.2(11) |
| H10C_49            | 109.5     | O1_51-C1_51-C2_51 | 105.7(12) |
| C1_50-O1_50-A120   | 148.5(11) | C4_51-C1_51-C2_51 | 105.4(10) |
| O1_50-C1_50-C2_50  | 112.3(11) | C3_51-C1_51-C2_51 | 110.6(11) |
| O1_50-C1_50-C4_50  | 110.7(11) | F2_51-C2_51-F3_51 | 106.5(15) |
| C2_50-C1_50-C4_50  | 108.3(12) | F2_51-C2_51-F1_51 | 105.5(16) |
| O1_50-C1_50-C3_50  | 110.8(11) | F3_51-C2_51-F1_51 | 113.8(16) |
| C2_50-C1_50-C3_50  | 107.2(11) | F2_51-C2_51-C1_51 | 112.7(15) |

|                    |           |                    |          |
|--------------------|-----------|--------------------|----------|
| F3_51-C2_51-C1_51  | 112.4(13) | C2_40-C3_40-AI3    | 70.1(2)  |
| F1_51-C2_51-C1_51  | 105.8(13) | C8_40-C3_40-AI3    | 126.4(3) |
| F6_51-C3_51-F4_51  | 107.1(14) | C3_40-C4_40-C5_40  | 109.0(3) |
| F6_51-C3_51-F5_51  | 108.2(14) | C3_40-C4_40-C7_40  | 125.7(5) |
| F4_51-C3_51-F5_51  | 108.3(15) | C5_40-C4_40-C7_40  | 125.3(5) |
| F6_51-C3_51-C1_51  | 114.1(13) | C3_40-C4_40-AI3    | 72.5(2)  |
| F4_51-C3_51-C1_51  | 110.0(13) | C5_40-C4_40-AI3    | 70.4(2)  |
| F5_51-C3_51-C1_51  | 109.0(12) | C7_40-C4_40-AI3    | 124.7(3) |
| F9_51-C4_51-F7_51  | 107.2(16) | C4_40-C5_40-C1_40  | 107.9(3) |
| F9_51-C4_51-F8_51  | 106.9(15) | C4_40-C5_40-C6_40  | 127.2(5) |
| F7_51-C4_51-F8_51  | 105.5(15) | C1_40-C5_40-C6_40  | 124.9(5) |
| F9_51-C4_51-C1_51  | 114.4(14) | C4_40-C5_40-AI3    | 72.8(2)  |
| F7_51-C4_51-C1_51  | 114.9(14) | C1_40-C5_40-AI3    | 70.2(2)  |
| F8_51-C4_51-C1_51  | 107.3(13) | C6_40-C5_40-AI3    | 124.1(3) |
| C1_32-O1_32-AI18   | 164.5(19) | C5_40-C6_40-H6A_40 | 109.5    |
| O1_32-C1_32-C2_32  | 109.8(13) | C5_40-C6_40-H6B_40 | 109.5    |
| O1_32-C1_32-C4_32  | 110.7(12) | H6A_40-C6_40-      | 109.5    |
| C2_32-C1_32-C4_32  | 111.1(10) | H6B_40             |          |
| O1_32-C1_32-C3_32  | 106.1(13) | C5_40-C6_40-H6C_40 | 109.5    |
| C2_32-C1_32-C3_32  | 110.7(10) | H6A_40-C6_40-      | 109.5    |
| C4_32-C1_32-C3_32  | 108.2(10) | H6C_40             |          |
| F1_32-C2_32-F2_32  | 106.5(13) | H6B_40-C6_40-      | 109.5    |
| F1_32-C2_32-F3_32  | 103.6(12) | H6C_40             |          |
| F2_32-C2_32-F3_32  | 107.8(12) | C4_40-C7_40-H7A_40 | 109.5    |
| F1_32-C2_32-C1_32  | 112.7(11) | C4_40-C7_40-H7B_40 | 109.5    |
| F2_32-C2_32-C1_32  | 113.2(11) | H7A_40-C7_40-      | 109.5    |
| F3_32-C2_32-C1_32  | 112.4(10) | H7B_40             |          |
| F6_32-C3_32-F4_32  | 111.3(12) | C4_40-C7_40-H7C_40 | 109.5    |
| F6_32-C3_32-F5_32  | 107.1(13) | H7A_40-C7_40-      | 109.5    |
| F4_32-C3_32-F5_32  | 108.5(13) | H7C_40             |          |
| F6_32-C3_32-C1_32  | 112.0(11) | H7B_40-C7_40-      | 109.5    |
| F4_32-C3_32-C1_32  | 110.6(11) | H7C_40             |          |
| F5_32-C3_32-C1_32  | 107.2(13) | C3_40-C8_40-H8A_40 | 109.5    |
| F9_32-C4_32-F7_32  | 107.0(13) | C3_40-C8_40-H8B_40 | 109.5    |
| F9_32-C4_32-F8_32  | 104.7(13) | H8A_40-C8_40-      | 109.5    |
| F7_32-C4_32-F8_32  | 107.4(14) | H8B_40             |          |
| F9_32-C4_32-C1_32  | 113.0(12) | C3_40-C8_40-H8C_40 | 109.5    |
| F7_32-C4_32-C1_32  | 112.1(12) | H8A_40-C8_40-      | 109.5    |
| F8_32-C4_32-C1_32  | 112.2(13) | H8C_40             |          |
| C5_40-C1_40-C2_40  | 107.0(3)  | H8B_40-C8_40-      | 109.5    |
| C5_40-C1_40-C10_40 | 127.1(4)  | H8C_40             |          |
| C2_40-C1_40-C10_40 | 125.8(4)  | C2_40-C9_40-H9A_40 | 109.5    |
| C5_40-C1_40-AI3    | 72.0(2)   | C2_40-C9_40-H9B_40 | 109.5    |
| C2_40-C1_40-AI3    | 72.17(19) | H9A_40-C9_40-      | 109.5    |
| C10_40-C1_40-AI3   | 122.9(3)  | H9B_40             |          |
| C3_40-C2_40-C1_40  | 107.8(3)  | C2_40-C9_40-H9C_40 | 109.5    |
| C3_40-C2_40-C9_40  | 126.9(4)  | H9A_40-C9_40-      | 109.5    |
| C1_40-C2_40-C9_40  | 125.1(4)  | H9C_40             |          |
| C3_40-C2_40-AI3    | 73.0(2)   | H9B_40-C9_40-      | 109.5    |
| C1_40-C2_40-AI3    | 69.88(19) | H9C_40             |          |
| C9_40-C2_40-AI3    | 125.7(3)  | C1_40-C10_40-      | 109.5    |
| C4_40-C3_40-C2_40  | 108.2(4)  | H10A_40            |          |
| C4_40-C3_40-C8_40  | 126.3(4)  | C1_40-C10_40-      | 109.5    |
| C2_40-C3_40-C8_40  | 125.4(4)  | H10B_40            |          |
| C4_40-C3_40-AI3    | 71.4(2)   |                    |          |

|                            |           |                            |          |
|----------------------------|-----------|----------------------------|----------|
| H10A_40-C10_40-<br>H10B_40 | 109.5     | H7B_52-C7_52-<br>H7C_52    | 109.5    |
| C1_40-C10_40-<br>H10C_40   | 109.5     | C3_52-C8_52-H8A_52         | 109.5    |
| H10A_40-C10_40-<br>H10C_40 | 109.5     | C3_52-C8_52-H8B_52         | 109.5    |
| H10B_40-C10_40-<br>H10C_40 | 109.5     | H8A_52-C8_52-<br>H8B_52    | 109.5    |
| C2_52-C1_52-C5_52          | 108.0(3)  | C3_52-C8_52-H8C_52         | 109.5    |
| C2_52-C1_52-C10_52         | 126.7(3)  | H8A_52-C8_52-<br>H8C_52    | 109.5    |
| C5_52-C1_52-C10_52         | 125.2(3)  | H8B_52-C8_52-<br>H8C_52    | 109.5    |
| C2_52-C1_52-AI2            | 72.28(18) | C2_52-C9_52-H9A_52         | 109.5    |
| C5_52-C1_52-AI2            | 71.21(18) | C2_52-C9_52-H9B_52         | 109.5    |
| C10_52-C1_52-AI2           | 124.5(3)  | H9A_52-C9_52-<br>H9B_52    | 109.5    |
| C1_52-C2_52-C3_52          | 108.1(3)  | C2_52-C9_52-H9C_52         | 109.5    |
| C1_52-C2_52-C9_52          | 125.4(4)  | H9A_52-C9_52-<br>H9C_52    | 109.5    |
| C3_52-C2_52-C9_52          | 126.5(4)  | H9B_52-C9_52-<br>H9C_52    | 109.5    |
| C1_52-C2_52-AI2            | 70.97(18) | C1_52-C10_52-<br>H10A_52   | 109.5    |
| C3_52-C2_52-AI2            | 72.14(19) | C1_52-C10_52-<br>H10B_52   | 109.5    |
| C9_52-C2_52-AI2            | 123.4(3)  | H10A_52-C10_52-<br>H10B_52 | 109.5    |
| C4_52-C3_52-C2_52          | 107.9(3)  | C1_52-C10_52-<br>H10C_52   | 109.5    |
| C4_52-C3_52-C8_52          | 126.6(4)  | H10A_52-C10_52-<br>H10C_52 | 109.5    |
| C2_52-C3_52-C8_52          | 125.5(4)  | H10B_52-C10_52-<br>H10C_52 | 109.5    |
| C4_52-C3_52-AI2            | 71.25(19) | C5_53-C1_53-C2_53          | 108.5(5) |
| C2_52-C3_52-AI2            | 70.9(2)   | C5_53-C1_53-C10_53         | 127.1(6) |
| C8_52-C3_52-AI2            | 123.9(3)  | C2_53-C1_53-C10_53         | 124.3(6) |
| C5_52-C4_52-C3_52          | 107.9(3)  | C5_53-C1_53-AI1            | 70.0(4)  |
| C5_52-C4_52-C7_52          | 126.8(3)  | C2_53-C1_53-AI1            | 71.0(3)  |
| C3_52-C4_52-C7_52          | 125.3(3)  | C10_53-C1_53-AI1           | 128.2(4) |
| C5_52-C4_52-AI2            | 70.53(19) | C1_53-C2_53-C3_53          | 109.2(5) |
| C3_52-C4_52-AI2            | 72.1(2)   | C1_53-C2_53-C9_53          | 126.1(6) |
| C7_52-C4_52-AI2            | 124.3(3)  | C3_53-C2_53-C9_53          | 124.6(6) |
| C4_52-C5_52-C1_52          | 108.2(3)  | C1_53-C2_53-AI1            | 72.2(3)  |
| C4_52-C5_52-C6_52          | 126.2(3)  | C3_53-C2_53-AI1            | 70.2(3)  |
| C1_52-C5_52-C6_52          | 125.5(3)  | C9_53-C2_53-AI1            | 125.9(4) |
| C4_52-C5_52-AI2            | 72.52(19) | C2_53-C3_53-C4_53          | 106.7(5) |
| C1_52-C5_52-AI2            | 71.48(18) | C2_53-C3_53-C8_53          | 125.2(7) |
| C6_52-C5_52-AI2            | 125.5(3)  | C4_53-C3_53-C8_53          | 128.2(7) |
| C5_52-C6_52-H6A_52         | 109.5     | C2_53-C3_53-AI1            | 72.5(3)  |
| C5_52-C6_52-H6B_52         | 109.5     | C4_53-C3_53-AI1            | 69.8(3)  |
| H6A_52-C6_52-<br>H6B_52    | 109.5     | C8_53-C3_53-AI1            | 123.2(4) |
| C5_52-C6_52-H6C_52         | 109.5     | C5_53-C4_53-C3_53          | 108.3(5) |
| H6A_52-C6_52-<br>H6C_52    | 109.5     | C5_53-C4_53-C7_53          | 124.0(7) |
| H6B_52-C6_52-<br>H6C_52    | 109.5     | C3_53-C4_53-C7_53          | 127.7(7) |
| C4_52-C7_52-H7A_52         | 109.5     | C5_53-C4_53-AI1            | 72.1(5)  |
| C4_52-C7_52-H7B_52         | 109.5     | C3_53-C4_53-AI1            | 71.8(3)  |
| H7A_52-C7_52-<br>H7B_52    | 109.5     |                            |          |
| C4_52-C7_52-H7C_52         | 109.5     |                            |          |
| H7A_52-C7_52-<br>H7C_52    | 109.5     |                            |          |

|                    |          |
|--------------------|----------|
| C7_53-C4_53-A11    | 122.5(5) |
| C1_53-C5_53-C4_53  | 107.3(5) |
| C1_53-C5_53-C6_53  | 123.5(7) |
| C4_53-C5_53-C6_53  | 128.9(8) |
| C1_53-C5_53-A11    | 72.9(4)  |
| C4_53-C5_53-A11    | 69.6(4)  |
| C6_53-C5_53-A11    | 127.4(6) |
| C5_53-C6_53-H6A_53 | 109.5    |
| C5_53-C6_53-H6B_53 | 109.5    |
| H6A_53-C6_53-      | 109.5    |
| H6B_53             |          |
| C5_53-C6_53-H6C_53 | 109.5    |
| H6A_53-C6_53-      | 109.5    |
| H6C_53             |          |
| H6B_53-C6_53-      | 109.5    |
| H6C_53             |          |
| C4_53-C7_53-H7A_53 | 109.5    |
| C4_53-C7_53-H7B_53 | 109.5    |
| H7A_53-C7_53-      | 109.5    |
| H7B_53             |          |
| C4_53-C7_53-H7C_53 | 109.5    |
| H7A_53-C7_53-      | 109.5    |
| H7C_53             |          |
| H7B_53-C7_53-      | 109.5    |
| H7C_53             |          |
| C3_53-C8_53-H8A_53 | 109.5    |
| C3_53-C8_53-H8B_53 | 109.5    |
| H8A_53-C8_53-      | 109.5    |
| H8B_53             |          |
| C3_53-C8_53-H8C_53 | 109.5    |
| H8A_53-C8_53-      | 109.5    |
| H8C_53             |          |
| H8B_53-C8_53-      | 109.5    |
| H8C_53             |          |
| C2_53-C9_53-H9A_53 | 109.5    |
| C2_53-C9_53-H9B_53 | 109.5    |
| H9A_53-C9_53-      | 109.5    |
| H9B_53             |          |
| C2_53-C9_53-H9C_53 | 109.5    |
| H9A_53-C9_53-      | 109.5    |
| H9C_53             |          |
| H9B_53-C9_53-      | 109.5    |
| H9C_53             |          |
| C1_53-C10_53-      | 109.5    |
| H10A_53            |          |
| C1_53-C10_53-      | 109.5    |
| H10B_53            |          |
| H10A_53-C10_53-    | 109.5    |
| H10B_53            |          |
| C1_53-C10_53-      | 109.5    |
| H10C_53            |          |
| H10A_53-C10_53-    | 109.5    |
| H10C_53            |          |
| H10B_53-C10_53-    | 109.5    |
| H10C_53            |          |



S-Table 10: Bond lengths and angles for **3**

| Atom-Atom  | Length [Å] |            |           |
|------------|------------|------------|-----------|
| Al1-Al2    | 2.725(3)   | Al12-O1_62 | 1.756(11) |
| Al1-Al3    | 2.771(3)   | Al12-O1_55 | 1.796(11) |
| Al1-Al1    | 2.799(3)   | Al13-O1_38 | 1.581(13) |
| Al2-Al4    | 2.742(3)   | Al13-O1_49 | 1.605(15) |
| Al2-Al6    | 2.785(3)   | Al13-O1_58 | 1.654(16) |
| Al2-Al5    | 2.790(3)   | Al13-O1_44 | 1.677(16) |
| Al3-Al8    | 2.760(3)   | Al13-O1_50 | 1.70(2)   |
| Al3-Al7    | 2.760(3)   | Al13-O1_60 | 1.71(3)   |
| Al3-Al9    | 2.766(3)   | Al13-O1_32 | 1.732(15) |
| Al1-C2_9   | 2.170(9)   | Al13-O1_31 | 1.767(9)  |
| Al1-C1_9   | 2.195(9)   | Al13-O1_51 | 1.767(17) |
| Al1-C3_9   | 2.203(10)  | Al13-O1_39 | 1.809(14) |
| Al1-C5_57  | 2.22(3)    | Al13-O1_37 | 1.818(11) |
| Al1-C5_9   | 2.233(9)   | Al14-O1_48 | 1.641(14) |
| Al1-C4_9   | 2.243(9)   | Al14-O1_15 | 1.653(18) |
| Al1-C1_57  | 2.28(3)    | Al14-O1_53 | 1.67(3)   |
| Al1-C4_57  | 2.32(3)    | Al14-O1_19 | 1.684(14) |
| Al1-C2_57  | 2.40(2)    | Al14-O1_16 | 1.699(10) |
| Al1-C3_57  | 2.44(2)    | Al14-O1_17 | 1.706(6)  |
| Al8-C5_11  | 2.201(7)   | Al14-O1_61 | 1.72(3)   |
| Al8-C4_11  | 2.205(8)   | Al14-O1_47 | 1.769(15) |
| Al8-C2_11  | 2.230(6)   | Al14-O1_18 | 1.775(10) |
| Al8-C3_11  | 2.233(7)   | Al14-O1_3  | 1.83(2)   |
| Al8-C1_11  | 2.234(7)   | Al2-C4_7   | 2.282(7)  |
| Al9-C4_12  | 2.217(7)   | Al2-C3_7   | 2.283(6)  |
| Al9-C5_12  | 2.231(7)   | Al2-C5_7   | 2.295(7)  |
| Al9-C3_12  | 2.236(8)   | Al2-C2_7   | 2.299(6)  |
| Al9-C2_12  | 2.238(7)   | Al2-C1_7   | 2.311(6)  |
| Al9-C1_12  | 2.249(7)   | Al3-C4_8   | 2.187(7)  |
| Al10-O1_46 | 1.614(12)  | Al3-C5_8   | 2.220(7)  |
| Al10-O1_29 | 1.676(7)   | Al3-C3_8   | 2.228(7)  |
| Al10-O1_28 | 1.703(9)   | Al3-C1_8   | 2.253(7)  |
| Al10-O1_40 | 1.716(8)   | Al3-C2_8   | 2.263(7)  |
| Al10-O1_43 | 1.715(15)  | Al4-C3_4   | 2.241(6)  |
| Al10-O1_59 | 1.75(2)    | Al4-C2_4   | 2.245(6)  |
| Al10-O1_45 | 1.756(10)  | Al4-C1_4   | 2.254(6)  |
| Al10-O1_35 | 1.771(11)  | Al4-C4_4   | 2.258(7)  |
| Al10-O1_30 | 1.799(19)  | Al4-C5_4   | 2.263(7)  |
| Al11-O1_54 | 1.66(3)    | Al5-C2_5   | 2.222(7)  |
| Al11-O1_26 | 1.694(14)  | Al5-C3_5   | 2.229(7)  |
| Al11-O1_24 | 1.712(6)   | Al5-C5_5   | 2.235(8)  |
| Al11-O1_25 | 1.714(5)   | Al5-C4_5   | 2.236(8)  |
| Al11-O1_34 | 1.730(12)  | Al5-C1_5   | 2.244(7)  |
| Al11-O1_33 | 1.740(16)  | Al6-C3_6   | 2.203(7)  |
| Al11-O1_27 | 1.749(6)   | Al6-C4_6   | 2.216(9)  |
| Al12-O1_56 | 1.49(3)    | Al6-C2_6   | 2.223(7)  |
| Al12-O1_22 | 1.619(12)  | Al6-C1_6   | 2.242(7)  |
| Al12-O1_2  | 1.65(3)    | Al6-C5_6   | 2.247(7)  |
| Al12-O1_36 | 1.682(18)  | Al7-C4_10  | 2.207(9)  |
| Al12-O1_20 | 1.705(8)   | Al7-C2_10  | 2.211(7)  |
| Al12-O1_21 | 1.713(9)   | Al7-C3_10  | 2.211(8)  |
| Al12-O1_23 | 1.727(16)  | Al7-C1_10  | 2.222(8)  |
|            |            | Al7-C5_10  | 2.225(9)  |
|            |            | C1_4-C5_4  | 1.403(8)  |
|            |            | C1_4-C2_4  | 1.404(8)  |

|              |           |              |           |
|--------------|-----------|--------------|-----------|
| C1_4-C10_4   | 1.513(8)  | C4_6-C5_6    | 1.412(9)  |
| C2_4-C3_4    | 1.402(8)  | C4_6-C7_6    | 1.508(10) |
| C2_4-C9_4    | 1.514(8)  | C5_6-C6_6    | 1.510(9)  |
| C3_4-C4_4    | 1.424(9)  | C6_6-H6A_6   | 0.9800    |
| C3_4-C8_4    | 1.519(9)  | C6_6-H6B_6   | 0.9800    |
| C4_4-C5_4    | 1.408(9)  | C6_6-H6C_6   | 0.9800    |
| C4_4-C7_4    | 1.513(9)  | C7_6-H7A_6   | 0.9800    |
| C5_4-C6_4    | 1.510(9)  | C7_6-H7B_6   | 0.9800    |
| C6_4-H6A_4   | 0.9800    | C7_6-H7C_6   | 0.9800    |
| C6_4-H6B_4   | 0.9800    | C8_6-H8A_6   | 0.9800    |
| C6_4-H6C_4   | 0.9800    | C8_6-H8B_6   | 0.9800    |
| C7_4-H7A_4   | 0.9800    | C8_6-H8C_6   | 0.9800    |
| C7_4-H7B_4   | 0.9800    | C9_6-H9A_6   | 0.9800    |
| C7_4-H7C_4   | 0.9800    | C9_6-H9B_6   | 0.9800    |
| C8_4-H8A_4   | 0.9800    | C9_6-H9C_6   | 0.9800    |
| C8_4-H8B_4   | 0.9800    | C10_6-H10A_6 | 0.9800    |
| C8_4-H8C_4   | 0.9800    | C10_6-H10B_6 | 0.9800    |
| C9_4-H9A_4   | 0.9800    | C10_6-H10C_6 | 0.9800    |
| C9_4-H9B_4   | 0.9800    | C1_7-C2_7    | 1.420(8)  |
| C9_4-H9C_4   | 0.9800    | C1_7-C5_7    | 1.420(8)  |
| C10_4-H10A_4 | 0.9800    | C1_7-C10_7   | 1.505(8)  |
| C10_4-H10B_4 | 0.9800    | C2_7-C3_7    | 1.417(7)  |
| C10_4-H10C_4 | 0.9800    | C2_7-C9_7    | 1.509(8)  |
| C1_5-C2_5    | 1.413(9)  | C3_7-C4_7    | 1.424(7)  |
| C1_5-C5_5    | 1.425(9)  | C3_7-C8_7    | 1.511(8)  |
| C1_5-C10_5   | 1.502(9)  | C4_7-C5_7    | 1.417(8)  |
| C2_5-C3_5    | 1.421(9)  | C4_7-C7_7    | 1.509(8)  |
| C2_5-C9_5    | 1.505(9)  | C5_7-C6_7    | 1.519(8)  |
| C3_5-C4_5    | 1.423(9)  | C6_7-H6A_7   | 0.9800    |
| C3_5-C8_5    | 1.509(9)  | C6_7-H6B_7   | 0.9800    |
| C4_5-C5_5    | 1.424(9)  | C6_7-H6C_7   | 0.9800    |
| C4_5-C7_5    | 1.507(9)  | C7_7-H7A_7   | 0.9800    |
| C5_5-C6_5    | 1.510(9)  | C7_7-H7B_7   | 0.9800    |
| C6_5-H6A_5   | 0.9800    | C7_7-H7C_7   | 0.9800    |
| C6_5-H6B_5   | 0.9800    | C8_7-H8A_7   | 0.9800    |
| C6_5-H6C_5   | 0.9800    | C8_7-H8B_7   | 0.9800    |
| C7_5-H7A_5   | 0.9800    | C8_7-H8C_7   | 0.9800    |
| C7_5-H7B_5   | 0.9800    | C9_7-H9A_7   | 0.9800    |
| C7_5-H7C_5   | 0.9800    | C9_7-H9B_7   | 0.9800    |
| C8_5-H8A_5   | 0.9800    | C9_7-H9C_7   | 0.9800    |
| C8_5-H8B_5   | 0.9800    | C10_7-H10A_7 | 0.9800    |
| C8_5-H8C_5   | 0.9800    | C10_7-H10B_7 | 0.9800    |
| C9_5-H9A_5   | 0.9800    | C10_7-H10C_7 | 0.9800    |
| C9_5-H9B_5   | 0.9800    | C1_8-C2_8    | 1.394(9)  |
| C9_5-H9C_5   | 0.9800    | C1_8-C5_8    | 1.419(9)  |
| C10_5-H10A_5 | 0.9800    | C1_8-C10_8   | 1.513(9)  |
| C10_5-H10B_5 | 0.9800    | C2_8-C3_8    | 1.411(8)  |
| C10_5-H10C_5 | 0.9800    | C2_8-C9_8    | 1.495(9)  |
| C1_6-C2_6    | 1.413(8)  | C3_8-C4_8    | 1.437(8)  |
| C1_6-C5_6    | 1.429(9)  | C3_8-C8_8    | 1.495(8)  |
| C1_6-C10_6   | 1.497(9)  | C4_8-C5_8    | 1.415(8)  |
| C2_6-C3_6    | 1.411(9)  | C4_8-C7_8    | 1.498(9)  |
| C2_6-C9_6    | 1.513(10) | C5_8-C6_8    | 1.503(9)  |
| C3_6-C4_6    | 1.427(9)  | C6_8-H6A_8   | 0.9800    |
| C3_6-C8_6    | 1.511(9)  | C6_8-H6B_8   | 0.9800    |

|              |           |                |           |
|--------------|-----------|----------------|-----------|
| C6_8-H6C_8   | 0.9800    | C8_10-H8B_10   | 0.9800    |
| C7_8-H7A_8   | 0.9800    | C8_10-H8C_10   | 0.9800    |
| C7_8-H7B_8   | 0.9800    | C9_10-H9A_10   | 0.9800    |
| C7_8-H7C_8   | 0.9800    | C9_10-H9B_10   | 0.9800    |
| C8_8-H8A_8   | 0.9800    | C9_10-H9C_10   | 0.9800    |
| C8_8-H8B_8   | 0.9800    | C10_10-H10A_10 | 0.9800    |
| C8_8-H8C_8   | 0.9800    | C10_10-H10B_10 | 0.9800    |
| C9_8-H9A_8   | 0.9800    | C10_10-H10C_10 | 0.9800    |
| C9_8-H9B_8   | 0.9800    | C1_11-C2_11    | 1.403(8)  |
| C9_8-H9C_8   | 0.9800    | C1_11-C5_11    | 1.435(9)  |
| C10_8-H10A_8 | 0.9800    | C1_11-C10_11   | 1.504(9)  |
| C10_8-H10B_8 | 0.9800    | C2_11-C3_11    | 1.413(8)  |
| C10_8-H10C_8 | 0.9800    | C2_11-C9_11    | 1.503(8)  |
| C1_9-C5_9    | 1.416(10) | C3_11-C4_11    | 1.405(8)  |
| C1_9-C2_9    | 1.420(10) | C3_11-C8_11    | 1.511(9)  |
| C1_9-C10_9   | 1.509(10) | C4_11-C5_11    | 1.421(9)  |
| C2_9-C3_9    | 1.423(10) | C4_11-C7_11    | 1.517(9)  |
| C2_9-C9_9    | 1.508(11) | C5_11-C6_11    | 1.507(9)  |
| C3_9-C4_9    | 1.401(10) | C6_11-H6A_11   | 0.9800    |
| C3_9-C8_9    | 1.514(10) | C6_11-H6B_11   | 0.9800    |
| C4_9-C5_9    | 1.414(9)  | C6_11-H6C_11   | 0.9800    |
| C4_9-C7_9    | 1.518(10) | C7_11-H7A_11   | 0.9800    |
| C5_9-C6_9    | 1.499(10) | C7_11-H7B_11   | 0.9800    |
| C6_9-H6A_9   | 0.9800    | C7_11-H7C_11   | 0.9800    |
| C6_9-H6B_9   | 0.9800    | C8_11-H8A_11   | 0.9800    |
| C6_9-H6C_9   | 0.9800    | C8_11-H8B_11   | 0.9800    |
| C7_9-H7A_9   | 0.9800    | C8_11-H8C_11   | 0.9800    |
| C7_9-H7B_9   | 0.9800    | C9_11-H9A_11   | 0.9800    |
| C7_9-H7C_9   | 0.9800    | C9_11-H9B_11   | 0.9800    |
| C8_9-H8A_9   | 0.9800    | C9_11-H9C_11   | 0.9800    |
| C8_9-H8B_9   | 0.9800    | C10_11-H10A_11 | 0.9800    |
| C8_9-H8C_9   | 0.9800    | C10_11-H10B_11 | 0.9800    |
| C9_9-H9A_9   | 0.9800    | C10_11-H10C_11 | 0.9800    |
| C9_9-H9B_9   | 0.9800    | C1_12-C2_12    | 1.413(9)  |
| C9_9-H9C_9   | 0.9800    | C1_12-C5_12    | 1.416(8)  |
| C10_9-H10A_9 | 0.9800    | C1_12-C10_12   | 1.506(10) |
| C10_9-H10B_9 | 0.9800    | C2_12-C3_12    | 1.414(9)  |
| C10_9-H10C_9 | 0.9800    | C2_12-C9_12    | 1.508(9)  |
| C1_10-C5_10  | 1.402(9)  | C3_12-C4_12    | 1.429(9)  |
| C1_10-C2_10  | 1.406(9)  | C3_12-C8_12    | 1.512(10) |
| C1_10-C10_10 | 1.505(10) | C4_12-C5_12    | 1.429(9)  |
| C2_10-C3_10  | 1.421(9)  | C4_12-C7_12    | 1.503(9)  |
| C2_10-C9_10  | 1.511(9)  | C5_12-C6_12    | 1.510(9)  |
| C3_10-C4_10  | 1.427(10) | C6_12-H6A_12   | 0.9800    |
| C3_10-C8_10  | 1.490(10) | C6_12-H6B_12   | 0.9800    |
| C4_10-C5_10  | 1.416(10) | C6_12-H6C_12   | 0.9800    |
| C4_10-C7_10  | 1.506(10) | C7_12-H7A_12   | 0.9800    |
| C5_10-C6_10  | 1.513(10) | C7_12-H7B_12   | 0.9800    |
| C6_10-H6A_10 | 0.9800    | C7_12-H7C_12   | 0.9800    |
| C6_10-H6B_10 | 0.9800    | C8_12-H8A_12   | 0.9800    |
| C6_10-H6C_10 | 0.9800    | C8_12-H8B_12   | 0.9800    |
| C7_10-H7A_10 | 0.9800    | C8_12-H8C_12   | 0.9800    |
| C7_10-H7B_10 | 0.9800    | C9_12-H9A_12   | 0.9800    |
| C7_10-H7C_10 | 0.9800    | C9_12-H9B_12   | 0.9800    |
| C8_10-H8A_10 | 0.9800    | C9_12-H9C_12   | 0.9800    |

|                |           |             |           |
|----------------|-----------|-------------|-----------|
| C10_12-H10A_12 | 0.9800    | O1_20-C1_20 | 1.346(9)  |
| C10_12-H10B_12 | 0.9800    | C1_20-C3_20 | 1.543(10) |
| C10_12-H10C_12 | 0.9800    | C1_20-C4_20 | 1.550(10) |
| O1_16-C1_16    | 1.348(10) | C1_20-C2_20 | 1.552(10) |
| C1_16-C2_16    | 1.543(11) | C2_20-F3_20 | 1.317(10) |
| C1_16-C4_16    | 1.548(11) | C2_20-F1_20 | 1.324(10) |
| C1_16-C3_16    | 1.562(11) | C2_20-F2_20 | 1.326(9)  |
| C2_16-F3_16    | 1.326(10) | C3_20-F6_20 | 1.299(11) |
| C2_16-F1_16    | 1.344(11) | C3_20-F5_20 | 1.301(10) |
| C2_16-F2_16    | 1.354(11) | C3_20-F4_20 | 1.322(10) |
| C3_16-F4_16    | 1.320(11) | C4_20-F9_20 | 1.314(10) |
| C3_16-F6_16    | 1.327(10) | C4_20-F8_20 | 1.318(9)  |
| C3_16-F5_16    | 1.344(11) | C4_20-F7_20 | 1.332(10) |
| C4_16-F9_16    | 1.275(11) | O1_21-C1_21 | 1.363(11) |
| C4_16-F8_16    | 1.343(10) | C1_21-C3_21 | 1.542(11) |
| C4_16-F7_16    | 1.377(11) | C1_21-C4_21 | 1.542(11) |
| O1_17-C1_17    | 1.351(8)  | C1_21-C2_21 | 1.569(11) |
| C1_17-C4_17    | 1.533(10) | C2_21-F1_21 | 1.321(12) |
| C1_17-C2_17    | 1.541(9)  | C2_21-F2_21 | 1.329(11) |
| C1_17-C3_17    | 1.569(10) | C2_21-F3_21 | 1.343(12) |
| C2_17-F3_17    | 1.304(10) | C3_21-F4_21 | 1.313(11) |
| C2_17-F2_17    | 1.320(10) | C3_21-F5_21 | 1.314(11) |
| C2_17-F1_17    | 1.349(10) | C3_21-F6_21 | 1.336(11) |
| C3_17-F4_17    | 1.307(10) | C4_21-F9_21 | 1.324(11) |
| C3_17-F5_17    | 1.332(10) | C4_21-F7_21 | 1.330(11) |
| C3_17-F6_17    | 1.339(10) | C4_21-F8_21 | 1.344(11) |
| C4_17-F7_17    | 1.325(11) | O1_22-C1_22 | 1.348(12) |
| C4_17-F9_17    | 1.337(10) | C1_22-C3_22 | 1.543(12) |
| C4_17-F8_17    | 1.341(10) | C1_22-C2_22 | 1.547(11) |
| O1_18-C1_18    | 1.349(10) | C1_22-C4_22 | 1.555(12) |
| C1_18-C4_18    | 1.542(11) | C2_22-F2_22 | 1.320(11) |
| C1_18-C2_18    | 1.549(11) | C2_22-F1_22 | 1.325(12) |
| C1_18-C3_18    | 1.595(11) | C2_22-F3_22 | 1.328(11) |
| C2_18-F1_18    | 1.325(11) | C3_22-F4_22 | 1.326(12) |
| C2_18-F2_18    | 1.327(11) | C3_22-F6_22 | 1.335(12) |
| C2_18-F3_18    | 1.331(11) | C3_22-F5_22 | 1.343(12) |
| C3_18-F5_18    | 1.313(11) | C4_22-F8_22 | 1.309(12) |
| C3_18-F4_18    | 1.324(11) | C4_22-F9_22 | 1.330(12) |
| C3_18-F6_18    | 1.338(11) | C4_22-F7_22 | 1.338(12) |
| C4_18-F7_18    | 1.314(11) | O1_23-C1_23 | 1.349(11) |
| C4_18-F8_18    | 1.331(11) | C1_23-C2_23 | 1.553(11) |
| C4_18-F9_18    | 1.338(11) | C1_23-C4_23 | 1.554(11) |
| O1_19-C1_19    | 1.361(11) | C1_23-C3_23 | 1.558(11) |
| C1_19-C2_19    | 1.550(11) | C2_23-F3_23 | 1.325(12) |
| C1_19-C3_19    | 1.557(11) | C2_23-F2_23 | 1.326(11) |
| C1_19-C4_19    | 1.568(12) | C2_23-F1_23 | 1.334(11) |
| C2_19-F2_19    | 1.328(12) | C3_23-F6_23 | 1.317(10) |
| C2_19-F1_19    | 1.331(12) | C3_23-F5_23 | 1.321(11) |
| C2_19-F3_19    | 1.345(12) | C3_23-F4_23 | 1.335(11) |
| C3_19-F5_19    | 1.307(12) | C4_23-F9_23 | 1.309(11) |
| C3_19-F4_19    | 1.308(12) | C4_23-F7_23 | 1.322(12) |
| C3_19-F6_19    | 1.319(11) | C4_23-F8_23 | 1.328(11) |
| C4_19-F7_19    | 1.322(12) | O1_24-C1_24 | 1.348(8)  |
| C4_19-F8_19    | 1.325(12) | C1_24-C3_24 | 1.548(9)  |
| C4_19-F9_19    | 1.338(12) | C1_24-C4_24 | 1.553(9)  |

|             |           |             |           |
|-------------|-----------|-------------|-----------|
| C1_24-C2_24 | 1.557(9)  | C2_28-F3_28 | 1.330(10) |
| C2_24-F1_24 | 1.317(8)  | C3_28-F4_28 | 1.336(10) |
| C2_24-F3_24 | 1.323(9)  | C3_28-F5_28 | 1.335(11) |
| C2_24-F2_24 | 1.344(8)  | C3_28-F6_28 | 1.337(10) |
| C3_24-F6_24 | 1.313(9)  | C4_28-F9_28 | 1.317(11) |
| C3_24-F4_24 | 1.314(9)  | C4_28-F7_28 | 1.327(10) |
| C3_24-F5_24 | 1.356(9)  | C4_28-F8_28 | 1.341(10) |
| C4_24-F9_24 | 1.302(9)  | O1_29-C1_29 | 1.361(10) |
| C4_24-F8_24 | 1.336(9)  | C1_29-C4_29 | 1.537(10) |
| C4_24-F7_24 | 1.353(9)  | C1_29-C2_29 | 1.551(10) |
| O1_25-C1_25 | 1.366(7)  | C1_29-C3_29 | 1.553(10) |
| C1_25-C4_25 | 1.543(8)  | C2_29-F3_29 | 1.324(10) |
| C1_25-C2_25 | 1.547(9)  | C2_29-F2_29 | 1.334(11) |
| C1_25-C3_25 | 1.549(9)  | C2_29-F1_29 | 1.335(10) |
| C2_25-F3_25 | 1.304(8)  | C3_29-F4_29 | 1.311(10) |
| C2_25-F1_25 | 1.330(8)  | C3_29-F5_29 | 1.322(10) |
| C2_25-F2_25 | 1.358(8)  | C3_29-F6_29 | 1.331(10) |
| C3_25-F4_25 | 1.320(8)  | C4_29-F9_29 | 1.326(10) |
| C3_25-F6_25 | 1.324(8)  | C4_29-F8_29 | 1.328(10) |
| C3_25-F5_25 | 1.353(8)  | C4_29-F7_29 | 1.329(11) |
| C4_25-F9_25 | 1.314(8)  | O1_30-C1_30 | 1.356(12) |
| C4_25-F7_25 | 1.327(9)  | C1_30-C4_30 | 1.548(12) |
| C4_25-F8_25 | 1.333(8)  | C1_30-C2_30 | 1.549(12) |
| O1_26-C1_26 | 1.359(11) | C1_30-C3_30 | 1.551(12) |
| C1_26-C4_26 | 1.542(11) | C2_30-F1_30 | 1.329(13) |
| C1_26-C3_26 | 1.556(11) | C2_30-F2_30 | 1.328(13) |
| C1_26-C2_26 | 1.556(11) | C2_30-F3_30 | 1.329(13) |
| C2_26-F3_26 | 1.320(11) | C3_30-F5_30 | 1.324(12) |
| C2_26-F1_26 | 1.328(11) | C3_30-F4_30 | 1.335(13) |
| C2_26-F2_26 | 1.331(11) | C3_30-F6_30 | 1.338(13) |
| C3_26-F6_26 | 1.317(11) | C4_30-F9_30 | 1.329(12) |
| C3_26-F5_26 | 1.328(11) | C4_30-F8_30 | 1.332(12) |
| C3_26-F4_26 | 1.341(11) | C4_30-F7_30 | 1.341(12) |
| C4_26-F7_26 | 1.325(11) | O1_31-C1_31 | 1.337(10) |
| C4_26-F9_26 | 1.333(11) | C1_31-C2_31 | 1.533(11) |
| C4_26-F8_26 | 1.346(11) | C1_31-C4_31 | 1.552(11) |
| O1_27-C1_27 | 1.364(9)  | C1_31-C3_31 | 1.577(11) |
| C1_27-C2_27 | 1.535(10) | C2_31-F1_31 | 1.288(11) |
| C1_27-C3_27 | 1.552(10) | C2_31-F3_31 | 1.324(11) |
| C1_27-C4_27 | 1.553(10) | C2_31-F2_31 | 1.360(10) |
| C2_27-F3_27 | 1.325(10) | C3_31-F5_31 | 1.291(11) |
| C2_27-F2_27 | 1.330(10) | C3_31-F6_31 | 1.328(11) |
| C2_27-F1_27 | 1.338(10) | C3_31-F4_31 | 1.340(11) |
| C3_27-F4_27 | 1.304(10) | C4_31-F9_31 | 1.297(11) |
| C3_27-F6_27 | 1.331(10) | C4_31-F7_31 | 1.317(11) |
| C3_27-F5_27 | 1.335(10) | C4_31-F8_31 | 1.330(10) |
| C4_27-F9_27 | 1.322(10) | O1_32-C1_32 | 1.348(12) |
| C4_27-F8_27 | 1.330(10) | C1_32-C3_32 | 1.543(11) |
| C4_27-F7_27 | 1.343(11) | C1_32-C2_32 | 1.559(11) |
| O1_28-C1_28 | 1.340(10) | C1_32-C4_32 | 1.563(11) |
| C1_28-C4_28 | 1.548(10) | C2_32-F3_32 | 1.328(12) |
| C1_28-C3_28 | 1.552(10) | C2_32-F1_32 | 1.336(12) |
| C1_28-C2_28 | 1.570(10) | C2_32-F2_32 | 1.341(11) |
| C2_28-F1_28 | 1.316(11) | C3_32-F6_32 | 1.330(12) |
| C2_28-F2_28 | 1.318(10) | C3_32-F4_32 | 1.337(11) |

|             |           |             |           |
|-------------|-----------|-------------|-----------|
| C3_32-F5_32 | 1.351(12) | C4_36-F7_36 | 1.325(12) |
| C4_32-F8_32 | 1.309(12) | C4_36-F8_36 | 1.327(12) |
| C4_32-F9_32 | 1.320(12) | O1_37-C1_37 | 1.373(11) |
| C4_32-F7_32 | 1.364(12) | C1_37-C2_37 | 1.534(11) |
| O1_33-C1_33 | 1.355(11) | C1_37-C3_37 | 1.543(11) |
| C1_33-C4_33 | 1.540(11) | C1_37-C4_37 | 1.547(11) |
| C1_33-C2_33 | 1.551(11) | C2_37-F3_37 | 1.340(12) |
| C1_33-C3_33 | 1.555(11) | C2_37-F1_37 | 1.345(12) |
| C2_33-F2_33 | 1.318(12) | C2_37-F2_37 | 1.352(12) |
| C2_33-F3_33 | 1.324(12) | C3_37-F5_37 | 1.319(12) |
| C2_33-F1_33 | 1.327(12) | C3_37-F4_37 | 1.324(12) |
| C3_33-F5_33 | 1.306(12) | C3_37-F6_37 | 1.344(11) |
| C3_33-F6_33 | 1.314(12) | C4_37-F8_37 | 1.317(12) |
| C3_33-F4_33 | 1.349(12) | C4_37-F9_37 | 1.343(12) |
| F5_33-F4_54 | 1.42(3)   | C4_37-F7_37 | 1.350(12) |
| C4_33-F7_33 | 1.319(12) | O1_38-C1_38 | 1.348(12) |
| C4_33-F9_33 | 1.325(12) | C1_38-C2_38 | 1.550(12) |
| C4_33-F8_33 | 1.346(12) | C1_38-C4_38 | 1.551(12) |
| O1_34-C1_34 | 1.352(12) | C1_38-C3_38 | 1.553(12) |
| C1_34-C4_34 | 1.547(12) | C2_38-F2_38 | 1.326(12) |
| C1_34-C3_34 | 1.553(12) | C2_38-F3_38 | 1.333(12) |
| C1_34-C2_34 | 1.553(12) | C2_38-F1_38 | 1.338(12) |
| C2_34-F2_34 | 1.320(13) | C3_38-F6_38 | 1.330(12) |
| C2_34-F3_34 | 1.323(13) | C3_38-F4_38 | 1.333(12) |
| C2_34-F1_34 | 1.327(13) | C3_38-F5_38 | 1.343(12) |
| C3_34-F5_34 | 1.322(13) | C4_38-F8_38 | 1.314(12) |
| C3_34-F6_34 | 1.323(13) | C4_38-F9_38 | 1.331(12) |
| C3_34-F4_34 | 1.324(13) | C4_38-F7_38 | 1.343(13) |
| C4_34-F8_34 | 1.331(13) | O1_39-C1_39 | 1.352(12) |
| C4_34-F9_34 | 1.335(13) | C1_39-C2_39 | 1.535(12) |
| C4_34-F7_34 | 1.338(13) | C1_39-C3_39 | 1.549(12) |
| O1_35-C1_35 | 1.368(12) | C1_39-C4_39 | 1.550(12) |
| C1_35-C2_35 | 1.551(12) | C2_39-F3_39 | 1.312(13) |
| C1_35-C4_35 | 1.552(12) | C2_39-F1_39 | 1.324(13) |
| C1_35-C3_35 | 1.555(12) | C2_39-F2_39 | 1.326(12) |
| C2_35-F1_35 | 1.327(13) | C3_39-F4_39 | 1.313(13) |
| C2_35-F2_35 | 1.328(12) | C3_39-F6_39 | 1.326(12) |
| C2_35-F3_35 | 1.334(12) | C3_39-F5_39 | 1.327(13) |
| C3_35-F4_35 | 1.327(12) | C4_39-F8_39 | 1.296(13) |
| C3_35-F5_35 | 1.330(13) | C4_39-F9_39 | 1.321(13) |
| C3_35-F6_35 | 1.341(12) | C4_39-F7_39 | 1.328(13) |
| C4_35-F7_35 | 1.322(12) | O1_40-C1_40 | 1.353(10) |
| C4_35-F9_35 | 1.334(12) | C1_40-C2_40 | 1.540(11) |
| C4_35-F8_35 | 1.338(12) | C1_40-C4_40 | 1.548(11) |
| O1_36-C1_36 | 1.351(12) | C1_40-C3_40 | 1.572(11) |
| C1_36-C3_36 | 1.544(12) | C2_40-F3_40 | 1.298(11) |
| C1_36-C2_36 | 1.553(12) | C2_40-F2_40 | 1.327(10) |
| C1_36-C4_36 | 1.564(11) | C2_40-F1_40 | 1.351(12) |
| C2_36-F2_36 | 1.322(11) | C3_40-F4_40 | 1.291(12) |
| C2_36-F1_36 | 1.329(12) | C3_40-F6_40 | 1.339(11) |
| C2_36-F3_36 | 1.339(12) | C3_40-F5_40 | 1.364(12) |
| C3_36-F4_36 | 1.323(12) | C4_40-F9_40 | 1.321(11) |
| C3_36-F6_36 | 1.327(11) | C4_40-F8_40 | 1.335(11) |
| C3_36-F5_36 | 1.341(12) | C4_40-F7_40 | 1.351(12) |
| C4_36-F9_36 | 1.320(12) | C1_41-F1_41 | 1.334(10) |

|             |           |             |           |
|-------------|-----------|-------------|-----------|
| C1_41-C6_41 | 1.369(10) | C2_45-F3_45 | 1.326(12) |
| C1_41-C2_41 | 1.379(10) | C3_45-F4_45 | 1.303(12) |
| C2_41-F2_41 | 1.333(10) | C3_45-F6_45 | 1.306(12) |
| C2_41-C3_41 | 1.369(10) | C3_45-F5_45 | 1.349(12) |
| C3_41-C4_41 | 1.381(10) | C4_45-F9_45 | 1.306(12) |
| C3_41-H3_41 | 0.9500    | C4_45-F7_45 | 1.334(12) |
| C4_41-C5_41 | 1.378(10) | C4_45-F8_45 | 1.343(12) |
| C4_41-H4_41 | 0.9500    | O1_46-C1_46 | 1.366(12) |
| C5_41-C6_41 | 1.384(10) | C1_46-C4_46 | 1.547(12) |
| C5_41-H5_41 | 0.9500    | C1_46-C3_46 | 1.550(12) |
| C6_41-H6_41 | 0.9500    | C1_46-C2_46 | 1.556(12) |
| C1_42-F1_42 | 1.324(12) | C2_46-F1_46 | 1.319(13) |
| C1_42-C6_42 | 1.371(12) | C2_46-F3_46 | 1.322(13) |
| C1_42-C2_42 | 1.398(12) | C2_46-F2_46 | 1.338(12) |
| C2_42-F2_42 | 1.343(12) | C3_46-F6_46 | 1.325(13) |
| C2_42-C3_42 | 1.344(12) | C3_46-F5_46 | 1.336(13) |
| C3_42-C4_42 | 1.380(12) | C3_46-F4_46 | 1.345(13) |
| C3_42-H3_42 | 0.9500    | C4_46-F9_46 | 1.326(13) |
| C4_42-C5_42 | 1.395(12) | C4_46-F8_46 | 1.329(13) |
| C4_42-H4_42 | 0.9500    | C4_46-F7_46 | 1.331(13) |
| C5_42-C6_42 | 1.368(12) | O1_47-C1_47 | 1.333(12) |
| C5_42-H5_42 | 0.9500    | C1_47-C4_47 | 1.552(12) |
| C6_42-H6_42 | 0.9500    | C1_47-C3_47 | 1.555(12) |
| O1_43-C1_43 | 1.343(13) | C1_47-C2_47 | 1.565(12) |
| C1_43-C4_43 | 1.544(12) | C2_47-F2_47 | 1.310(13) |
| C1_43-C3_43 | 1.552(12) | C2_47-F1_47 | 1.320(13) |
| C1_43-C2_43 | 1.553(12) | C2_47-F3_47 | 1.336(13) |
| C2_43-F3_43 | 1.310(13) | C3_47-F4_47 | 1.320(13) |
| C2_43-F1_43 | 1.317(13) | C3_47-F6_47 | 1.321(13) |
| C2_43-F2_43 | 1.325(13) | C3_47-F5_47 | 1.332(13) |
| C3_43-F6_43 | 1.323(12) | C4_47-F8_47 | 1.327(13) |
| C3_43-F4_43 | 1.327(13) | C4_47-F7_47 | 1.338(13) |
| C3_43-F5_43 | 1.334(13) | C4_47-F9_47 | 1.338(13) |
| C4_43-F9_43 | 1.307(12) | O1_48-C1_48 | 1.345(12) |
| C4_43-F8_43 | 1.315(13) | C1_48-C2_48 | 1.542(11) |
| C4_43-F7_43 | 1.327(13) | C1_48-C3_48 | 1.543(12) |
| O1_44-C1_44 | 1.341(13) | C1_48-C4_48 | 1.559(12) |
| C1_44-C2_44 | 1.536(12) | C2_48-F3_48 | 1.308(12) |
| C1_44-C4_44 | 1.547(12) | C2_48-F1_48 | 1.331(12) |
| C1_44-C3_44 | 1.578(12) | C2_48-F2_48 | 1.342(12) |
| C2_44-F1_44 | 1.312(13) | C3_48-F4_48 | 1.312(12) |
| C2_44-F3_44 | 1.338(13) | C3_48-F6_48 | 1.327(12) |
| C2_44-F2_44 | 1.345(12) | C3_48-F5_48 | 1.342(12) |
| C3_44-F6_44 | 1.306(13) | C4_48-F8_48 | 1.315(12) |
| C3_44-F5_44 | 1.315(13) | C4_48-F9_48 | 1.332(12) |
| C3_44-F4_44 | 1.354(13) | C4_48-F7_48 | 1.345(12) |
| C4_44-F9_44 | 1.304(12) | O1_49-C1_49 | 1.332(12) |
| C4_44-F8_44 | 1.332(12) | C1_49-C3_49 | 1.547(12) |
| C4_44-F7_44 | 1.341(13) | C1_49-C2_49 | 1.551(12) |
| O1_45-C1_45 | 1.349(11) | C1_49-C4_49 | 1.553(12) |
| C1_45-C2_45 | 1.538(11) | C2_49-F1_49 | 1.314(13) |
| C1_45-C3_45 | 1.550(12) | C2_49-F2_49 | 1.314(13) |
| C1_45-C4_45 | 1.552(12) | C2_49-F3_49 | 1.356(13) |
| C2_45-F2_45 | 1.283(12) | C3_49-F6_49 | 1.304(13) |
| C2_45-F1_45 | 1.313(13) | C3_49-F4_49 | 1.324(13) |

|                 |           |                 |          |
|-----------------|-----------|-----------------|----------|
| C3_49-F5_49     | 1.331(13) | C7A_52-H7AB_52  | 0.9800   |
| C4_49-F7_49     | 1.295(13) | C7A_52-H7AC_52  | 0.9800   |
| C4_49-F8_49     | 1.297(13) | C6A_52-H6AA_52  | 0.9800   |
| C4_49-F9_49     | 1.337(13) | C6A_52-H6AB_52  | 0.9800   |
| O1_50-C1_50     | 1.343(13) | C6A_52-H6AC_52  | 0.9800   |
| C1_50-C3_50     | 1.552(12) | C1B_52-C2B_52   | 1.425(8) |
| C1_50-C4_50     | 1.553(12) | C1B_52-C5B_52   | 1.430(8) |
| C1_50-C2_50     | 1.558(12) | C1B_52-C6B_52   | 1.504(8) |
| C2_50-F2_50     | 1.323(13) | C2B_52-C3B_52   | 1.424(7) |
| C2_50-F3_50     | 1.325(13) | C2B_52-C7B_52   | 1.499(8) |
| C2_50-F1_50     | 1.344(13) | C3B_52-C4B_52   | 1.416(8) |
| C3_50-F6_50     | 1.332(13) | C3B_52-C8B_52   | 1.513(8) |
| C3_50-F4_50     | 1.333(13) | C4B_52-C5B_52   | 1.430(8) |
| C3_50-F5_50     | 1.349(13) | C4B_52-C9B_52   | 1.503(8) |
| C4_50-F8_50     | 1.298(13) | C5B_52-C10B_52  | 1.499(8) |
| C4_50-F9_50     | 1.327(13) | C10B_52-H10D_52 | 0.9800   |
| C4_50-F7_50     | 1.363(13) | C10B_52-H10E_52 | 0.9800   |
| TI1_52-AI3_52   | 2.769(3)  | C10B_52-H10F_52 | 0.9800   |
| TI1_52-AI2_52   | 2.788(3)  | C9B_52-H9BA_52  | 0.9800   |
| TI1_52-AI1_52   | 2.789(3)  | C9B_52-H9BB_52  | 0.9800   |
| AI2_52-C5B_52   | 2.209(6)  | C9B_52-H9BC_52  | 0.9800   |
| AI2_52-C1B_52   | 2.224(6)  | C8B_52-H8BA_52  | 0.9800   |
| AI2_52-C4B_52   | 2.224(6)  | C8B_52-H8BB_52  | 0.9800   |
| AI2_52-C2B_52   | 2.240(6)  | C8B_52-H8BC_52  | 0.9800   |
| AI2_52-C3B_52   | 2.239(6)  | C7B_52-H7BA_52  | 0.9800   |
| AI3_52-C5C_52   | 2.225(6)  | C7B_52-H7BB_52  | 0.9800   |
| AI3_52-C4C_52   | 2.229(6)  | C7B_52-H7BC_52  | 0.9800   |
| AI3_52-C2C_52   | 2.232(6)  | C6B_52-H6BA_52  | 0.9800   |
| AI3_52-C1C_52   | 2.235(6)  | C6B_52-H6BB_52  | 0.9800   |
| AI3_52-C3C_52   | 2.244(7)  | C6B_52-H6BC_52  | 0.9800   |
| AI1_52-C1A_52   | 2.236(6)  | C1C_52-C5C_52   | 1.427(8) |
| AI1_52-C2A_52   | 2.240(7)  | C1C_52-C2C_52   | 1.431(8) |
| AI1_52-C3A_52   | 2.249(7)  | C1C_52-C6C_52   | 1.496(8) |
| AI1_52-C5A_52   | 2.251(6)  | C2C_52-C3C_52   | 1.406(8) |
| AI1_52-C4A_52   | 2.265(6)  | C2C_52-C7C_52   | 1.498(8) |
| C1A_52-C5A_52   | 1.418(8)  | C3C_52-C4C_52   | 1.411(8) |
| C1A_52-C2A_52   | 1.424(8)  | C3C_52-C8C_52   | 1.502(9) |
| C1A_52-C6A_52   | 1.508(8)  | C4C_52-C5C_52   | 1.413(8) |
| C2A_52-C3A_52   | 1.413(8)  | C4C_52-C9C_52   | 1.505(8) |
| C2A_52-C7A_52   | 1.509(8)  | C5C_52-C10C_52  | 1.498(8) |
| C3A_52-C4A_52   | 1.419(8)  | C10C_52-H10G_52 | 0.9800   |
| C3A_52-C8A_52   | 1.512(8)  | C10C_52-H10H_52 | 0.9800   |
| C4A_52-C5A_52   | 1.420(8)  | C10C_52-H10I_52 | 0.9800   |
| C4A_52-C9A_52   | 1.499(8)  | C9C_52-H9CA_52  | 0.9800   |
| C5A_52-C10A_52  | 1.504(8)  | C9C_52-H9CB_52  | 0.9800   |
| C10A_52-H10A_52 | 0.9800    | C9C_52-H9CC_52  | 0.9800   |
| C10A_52-H10B_52 | 0.9800    | C8C_52-H8CA_52  | 0.9800   |
| C10A_52-H10C_52 | 0.9800    | C8C_52-H8CB_52  | 0.9800   |
| C9A_52-H9AA_52  | 0.9800    | C8C_52-H8CC_52  | 0.9800   |
| C9A_52-H9AB_52  | 0.9800    | C7C_52-H7CA_52  | 0.9800   |
| C9A_52-H9AC_52  | 0.9800    | C7C_52-H7CB_52  | 0.9800   |
| C8A_52-H8AA_52  | 0.9800    | C7C_52-H7CC_52  | 0.9800   |
| C8A_52-H8AB_52  | 0.9800    | C6C_52-H6CA_52  | 0.9800   |
| C8A_52-H8AC_52  | 0.9800    | C6C_52-H6CB_52  | 0.9800   |
| C7A_52-H7AA_52  | 0.9800    | C6C_52-H6CC_52  | 0.9800   |



|                 |           |                 |           |
|-----------------|-----------|-----------------|-----------|
| TI1_13-AI3_13   | 2.745(12) | C10B_13-H10D_13 | 0.9800    |
| TI1_13-AI1_13   | 2.742(12) | C10B_13-H10E_13 | 0.9800    |
| TI1_13-AI2_13   | 2.797(12) | C10B_13-H10F_13 | 0.9800    |
| AI2_13-C3B_13   | 2.225(14) | C9B_13-H9BA_13  | 0.9800    |
| AI2_13-C2B_13   | 2.204(14) | C9B_13-H9BB_13  | 0.9800    |
| AI2_13-C4B_13   | 2.256(14) | C9B_13-H9BC_13  | 0.9800    |
| AI2_13-C1B_13   | 2.219(14) | C8B_13-H8BA_13  | 0.9800    |
| AI2_13-C5B_13   | 2.246(14) | C8B_13-H8BB_13  | 0.9800    |
| AI2_13-AI1_13   | 3.053(13) | C8B_13-H8BC_13  | 0.9800    |
| AI3_13-C4C_13   | 2.242(14) | C7B_13-H7BA_13  | 0.9800    |
| AI3_13-C5C_13   | 2.234(14) | C7B_13-H7BB_13  | 0.9800    |
| AI3_13-C3C_13   | 2.244(14) | C7B_13-H7BC_13  | 0.9800    |
| AI3_13-C2C_13   | 2.233(14) | C6B_13-H6BA_13  | 0.9800    |
| AI3_13-C1C_13   | 2.232(14) | C6B_13-H6BB_13  | 0.9800    |
| AI3_13-AI1_13   | 3.020(13) | C6B_13-H6BC_13  | 0.9800    |
| AI1_13-C3A_13   | 2.244(14) | C1C_13-C5C_13   | 1.418(14) |
| AI1_13-C4A_13   | 2.245(14) | C1C_13-C2C_13   | 1.422(14) |
| AI1_13-C2A_13   | 2.256(14) | C1C_13-C6C_13   | 1.506(14) |
| AI1_13-C5A_13   | 2.254(14) | C2C_13-C3C_13   | 1.422(14) |
| AI1_13-C1A_13   | 2.260(14) | C2C_13-C7C_13   | 1.500(14) |
| C1A_13-C2A_13   | 1.415(14) | C3C_13-C4C_13   | 1.415(16) |
| C1A_13-C5A_13   | 1.418(14) | C3C_13-C8C_13   | 1.504(14) |
| C1A_13-C6A_13   | 1.510(14) | C4C_13-C5C_13   | 1.425(14) |
| C2A_13-C3A_13   | 1.422(14) | C4C_13-C9C_13   | 1.504(14) |
| C2A_13-C7A_13   | 1.511(14) | C5C_13-C10C_13  | 1.505(14) |
| C3A_13-C4A_13   | 1.415(16) | C10C_13-H10G_13 | 0.9800    |
| C3A_13-C8A_13   | 1.505(14) | C10C_13-H10H_13 | 0.9800    |
| C4A_13-C5A_13   | 1.416(14) | C10C_13-H10I_13 | 0.9800    |
| C4A_13-C9A_13   | 1.509(14) | C9C_13-H9CA_13  | 0.9800    |
| C5A_13-C10A_13  | 1.508(14) | C9C_13-H9CB_13  | 0.9800    |
| C10A_13-H10A_13 | 0.9800    | C9C_13-H9CC_13  | 0.9800    |
| C10A_13-H10B_13 | 0.9800    | C8C_13-H8CA_13  | 0.9800    |
| C10A_13-H10C_13 | 0.9800    | C8C_13-H8CB_13  | 0.9800    |
| C9A_13-H9AA_13  | 0.9800    | C8C_13-H8CC_13  | 0.9800    |
| C9A_13-H9AB_13  | 0.9800    | C7C_13-H7CA_13  | 0.9800    |
| C9A_13-H9AC_13  | 0.9800    | C7C_13-H7CB_13  | 0.9800    |
| C8A_13-H8AA_13  | 0.9800    | C7C_13-H7CC_13  | 0.9800    |
| C8A_13-H8AB_13  | 0.9800    | C6C_13-H6CA_13  | 0.9800    |
| C8A_13-H8AC_13  | 0.9800    | C6C_13-H6CB_13  | 0.9800    |
| C7A_13-H7AA_13  | 0.9800    | C6C_13-H6CC_13  | 0.9800    |
| C7A_13-H7AB_13  | 0.9800    | TI1_14-AI1_14   | 2.759(5)  |
| C7A_13-H7AC_13  | 0.9800    | TI1_14-AI3_14   | 2.771(4)  |
| C6A_13-H6AA_13  | 0.9800    | TI1_14-AI2_14   | 2.785(3)  |
| C6A_13-H6AB_13  | 0.9800    | AI2_14-C5B_14   | 2.221(7)  |
| C6A_13-H6AC_13  | 0.9800    | AI2_14-C4B_14   | 2.223(7)  |
| C1B_13-C5B_13   | 1.410(14) | AI2_14-C3B_14   | 2.233(7)  |
| C1B_13-C2B_13   | 1.432(14) | AI2_14-C1B_14   | 2.242(7)  |
| C1B_13-C6B_13   | 1.511(14) | AI2_14-C2B_14   | 2.247(6)  |
| C2B_13-C3B_13   | 1.411(14) | AI3_14-C4C_14   | 2.207(7)  |
| C2B_13-C7B_13   | 1.504(14) | AI3_14-C5C_14   | 2.224(7)  |
| C3B_13-C4B_13   | 1.415(16) | AI3_14-C2C_14   | 2.230(6)  |
| C3B_13-C8B_13   | 1.511(14) | AI3_14-C1C_14   | 2.234(7)  |
| C4B_13-C5B_13   | 1.421(14) | AI3_14-C3C_14   | 2.232(6)  |
| C4B_13-C9B_13   | 1.516(14) | AI1_14-C1A_14   | 2.219(7)  |
| C5B_13-C10B_13  | 1.508(14) | AI1_14-C5A_14   | 2.231(7)  |

|                 |          |                 |           |
|-----------------|----------|-----------------|-----------|
| AI1_14-C2A_14   | 2.227(7) | C1C_14-C6C_14   | 1.508(8)  |
| AI1_14-C3A_14   | 2.256(8) | C2C_14-C3C_14   | 1.434(8)  |
| AI1_14-C4A_14   | 2.263(8) | C2C_14-C7C_14   | 1.501(8)  |
| C1A_14-C5A_14   | 1.417(8) | C3C_14-C4C_14   | 1.420(8)  |
| C1A_14-C2A_14   | 1.421(8) | C3C_14-C8C_14   | 1.501(8)  |
| C1A_14-C6A_14   | 1.511(9) | C4C_14-C5C_14   | 1.433(8)  |
| C2A_14-C3A_14   | 1.417(9) | C4C_14-C9C_14   | 1.502(8)  |
| C2A_14-C7A_14   | 1.500(9) | C5C_14-C10C_14  | 1.502(8)  |
| C3A_14-C4A_14   | 1.411(9) | C10C_14-H10G_14 | 0.9800    |
| C3A_14-C8A_14   | 1.512(9) | C10C_14-H10H_14 | 0.9800    |
| C4A_14-C5A_14   | 1.418(8) | C10C_14-H10I_14 | 0.9800    |
| C4A_14-C9A_14   | 1.501(9) | C9C_14-H9CA_14  | 0.9800    |
| C5A_14-C10A_14  | 1.503(8) | C9C_14-H9CB_14  | 0.9800    |
| C10A_14-H10A_14 | 0.9800   | C9C_14-H9CC_14  | 0.9800    |
| C10A_14-H10B_14 | 0.9800   | C8C_14-H8CA_14  | 0.9800    |
| C10A_14-H10C_14 | 0.9800   | C8C_14-H8CB_14  | 0.9800    |
| C9A_14-H9AA_14  | 0.9800   | C8C_14-H8CC_14  | 0.9800    |
| C9A_14-H9AB_14  | 0.9800   | C7C_14-H7CA_14  | 0.9800    |
| C9A_14-H9AC_14  | 0.9800   | C7C_14-H7CB_14  | 0.9800    |
| C8A_14-H8AA_14  | 0.9800   | C7C_14-H7CC_14  | 0.9800    |
| C8A_14-H8AB_14  | 0.9800   | C6C_14-H6CA_14  | 0.9800    |
| C8A_14-H8AC_14  | 0.9800   | C6C_14-H6CB_14  | 0.9800    |
| C7A_14-H7AA_14  | 0.9800   | C6C_14-H6CC_14  | 0.9800    |
| C7A_14-H7AB_14  | 0.9800   | TI1_1-AI1_1     | 2.695(11) |
| C7A_14-H7AC_14  | 0.9800   | TI1_1-AI2_1     | 2.747(12) |
| C6A_14-H6AA_14  | 0.9800   | TI1_1-AI3_1     | 2.771(11) |
| C6A_14-H6AB_14  | 0.9800   | AI2_1-C1B_1     | 2.216(14) |
| C6A_14-H6AC_14  | 0.9800   | AI2_1-C5B_1     | 2.217(14) |
| C1B_14-C5B_14   | 1.417(8) | AI2_1-C2B_1     | 2.233(14) |
| C1B_14-C2B_14   | 1.427(8) | AI2_1-C4B_1     | 2.231(14) |
| C1B_14-C6B_14   | 1.505(9) | AI2_1-C3B_1     | 2.246(14) |
| C2B_14-C3B_14   | 1.415(8) | AI3_1-C3C_1     | 2.221(14) |
| C2B_14-C7B_14   | 1.493(9) | AI3_1-C2C_1     | 2.224(14) |
| C3B_14-C4B_14   | 1.403(9) | AI3_1-C4C_1     | 2.239(14) |
| C3B_14-C8B_14   | 1.502(8) | AI3_1-C5C_1     | 2.259(14) |
| C4B_14-C5B_14   | 1.420(8) | AI3_1-C1C_1     | 2.264(14) |
| C4B_14-C9B_14   | 1.511(9) | AI1_1-C2A_1     | 2.250(13) |
| C5B_14-C10B_14  | 1.501(8) | AI1_1-C3A_1     | 2.257(13) |
| C10B_14-H10D_14 | 0.9800   | AI1_1-C1A_1     | 2.262(13) |
| C10B_14-H10E_14 | 0.9800   | AI1_1-C4A_1     | 2.275(13) |
| C10B_14-H10F_14 | 0.9800   | AI1_1-C5A_1     | 2.275(13) |
| C9B_14-H9BA_14  | 0.9800   | C1A_1-C5A_1     | 1.407(13) |
| C9B_14-H9BB_14  | 0.9800   | C1A_1-C2A_1     | 1.421(14) |
| C9B_14-H9BC_14  | 0.9800   | C1A_1-C6A_1     | 1.514(14) |
| C8B_14-H8BA_14  | 0.9800   | C2A_1-C3A_1     | 1.410(14) |
| C8B_14-H8BB_14  | 0.9800   | C2A_1-C7A_1     | 1.502(14) |
| C8B_14-H8BC_14  | 0.9800   | C3A_1-C4A_1     | 1.415(16) |
| C7B_14-H7BA_14  | 0.9800   | C3A_1-C8A_1     | 1.510(14) |
| C7B_14-H7BB_14  | 0.9800   | C4A_1-C5A_1     | 1.419(14) |
| C7B_14-H7BC_14  | 0.9800   | C4A_1-C9A_1     | 1.506(14) |
| C6B_14-H6BA_14  | 0.9800   | C5A_1-C10A_1    | 1.509(14) |
| C6B_14-H6BB_14  | 0.9800   | C10A_1-H10A_1   | 0.9800    |
| C6B_14-H6BC_14  | 0.9800   | C10A_1-H10B_1   | 0.9800    |
| C1C_14-C5C_14   | 1.426(8) | C10A_1-H10C_1   | 0.9800    |
| C1C_14-C2C_14   | 1.425(8) | C9A_1-H9AA_1    | 0.9800    |

|               |           |              |           |
|---------------|-----------|--------------|-----------|
| C9A_1-H9AB_1  | 0.9800    | C7C_1-H7CA_1 | 0.9800    |
| C9A_1-H9AC_1  | 0.9800    | C7C_1-H7CB_1 | 0.9800    |
| C8A_1-H8AA_1  | 0.9800    | C7C_1-H7CC_1 | 0.9800    |
| C8A_1-H8AB_1  | 0.9800    | C6C_1-H6CA_1 | 0.9800    |
| C8A_1-H8AC_1  | 0.9800    | C6C_1-H6CB_1 | 0.9800    |
| C7A_1-H7AA_1  | 0.9800    | C6C_1-H6CC_1 | 0.9800    |
| C7A_1-H7AB_1  | 0.9800    | O1_2-C1_2    | 1.348(13) |
| C7A_1-H7AC_1  | 0.9800    | C1_2-C4_2    | 1.543(13) |
| C6A_1-H6AA_1  | 0.9800    | C1_2-C3_2    | 1.548(13) |
| C6A_1-H6AB_1  | 0.9800    | C1_2-C2_2    | 1.561(13) |
| C6A_1-H6AC_1  | 0.9800    | C2_2-F1_2    | 1.311(13) |
| C1B_1-C2B_1   | 1.412(14) | C2_2-F3_2    | 1.319(14) |
| C1B_1-C5B_1   | 1.432(14) | C2_2-F2_2    | 1.321(13) |
| C1B_1-C6B_1   | 1.509(14) | C3_2-F6_2    | 1.325(14) |
| C2B_1-C3B_1   | 1.424(14) | C3_2-F4_2    | 1.327(13) |
| C2B_1-C7B_1   | 1.504(14) | C3_2-F5_2    | 1.349(14) |
| C3B_1-C4B_1   | 1.414(15) | C4_2-F9_2    | 1.331(14) |
| C3B_1-C8B_1   | 1.512(14) | C4_2-F7_2    | 1.332(14) |
| C4B_1-C5B_1   | 1.419(14) | C4_2-F8_2    | 1.333(14) |
| C4B_1-C9B_1   | 1.510(14) | O1_3-C1_3    | 1.351(13) |
| C5B_1-C10B_1  | 1.511(14) | C1_3-C4_3    | 1.543(13) |
| C10B_1-H10D_1 | 0.9800    | C1_3-C3_3    | 1.556(13) |
| C10B_1-H10E_1 | 0.9800    | C1_3-C2_3    | 1.570(13) |
| C10B_1-H10F_1 | 0.9800    | C2_3-F2_3    | 1.322(14) |
| C9B_1-H9BA_1  | 0.9800    | C2_3-F3_3    | 1.331(14) |
| C9B_1-H9BB_1  | 0.9800    | C2_3-F1_3    | 1.338(14) |
| C9B_1-H9BC_1  | 0.9800    | C3_3-F6_3    | 1.323(14) |
| C8B_1-H8BA_1  | 0.9800    | C3_3-F5_3    | 1.328(14) |
| C8B_1-H8BB_1  | 0.9800    | C3_3-F4_3    | 1.332(14) |
| C8B_1-H8BC_1  | 0.9800    | C4_3-F9_3    | 1.328(14) |
| C7B_1-H7BA_1  | 0.9800    | C4_3-F7_3    | 1.333(14) |
| C7B_1-H7BB_1  | 0.9800    | C4_3-F8_3    | 1.364(14) |
| C7B_1-H7BC_1  | 0.9800    | O1_15-C1_15  | 1.355(13) |
| C6B_1-H6BA_1  | 0.9800    | C1_15-C3_15  | 1.546(13) |
| C6B_1-H6BB_1  | 0.9800    | C1_15-C2_15  | 1.555(12) |
| C6B_1-H6BC_1  | 0.9800    | C1_15-C4_15  | 1.557(13) |
| C1C_1-C5C_1   | 1.412(14) | C2_15-F1_15  | 1.327(13) |
| C1C_1-C2C_1   | 1.423(14) | C2_15-F3_15  | 1.330(13) |
| C1C_1-C6C_1   | 1.502(14) | C2_15-F2_15  | 1.332(13) |
| C2C_1-C3C_1   | 1.416(14) | C3_15-F4_15  | 1.324(13) |
| C2C_1-C7C_1   | 1.504(14) | C3_15-F5_15  | 1.326(13) |
| C3C_1-C4C_1   | 1.417(16) | C3_15-F6_15  | 1.339(14) |
| C3C_1-C8C_1   | 1.498(14) | C4_15-F9_15  | 1.326(13) |
| C4C_1-C5C_1   | 1.422(14) | C4_15-F7_15  | 1.334(13) |
| C4C_1-C9C_1   | 1.506(14) | C4_15-F8_15  | 1.336(13) |
| C5C_1-C10C_1  | 1.508(14) | O1_51-C1_51  | 1.351(13) |
| C10C_1-H10G_1 | 0.9800    | C1_51-C4_51  | 1.543(12) |
| C10C_1-H10H_1 | 0.9800    | C1_51-C2_51  | 1.543(12) |
| C10C_1-H10I_1 | 0.9800    | C1_51-C3_51  | 1.560(13) |
| C9C_1-H9CA_1  | 0.9800    | C2_51-F3_51  | 1.329(13) |
| C9C_1-H9CB_1  | 0.9800    | C2_51-F1_51  | 1.332(13) |
| C9C_1-H9CC_1  | 0.9800    | C2_51-F2_51  | 1.341(13) |
| C8C_1-H8CA_1  | 0.9800    | C3_51-F5_51  | 1.299(13) |
| C8C_1-H8CB_1  | 0.9800    | C3_51-F6_51  | 1.317(13) |
| C8C_1-H8CC_1  | 0.9800    | C3_51-F4_51  | 1.328(13) |

|             |           |                |           |
|-------------|-----------|----------------|-----------|
| C4_51-F8_51 | 1.318(13) | C1_57-C5_57    | 1.414(13) |
| C4_51-F9_51 | 1.321(13) | C1_57-C2_57    | 1.417(13) |
| C4_51-F7_51 | 1.339(13) | C1_57-C10_57   | 1.505(13) |
| O1_53-C1_53 | 1.352(13) | C2_57-C3_57    | 1.410(13) |
| C1_53-C3_53 | 1.546(13) | C2_57-C9_57    | 1.511(13) |
| C1_53-C2_53 | 1.551(13) | C3_57-C4_57    | 1.418(13) |
| C1_53-C4_53 | 1.555(13) | C3_57-C8_57    | 1.510(13) |
| C2_53-F3_53 | 1.325(13) | C4_57-C5_57    | 1.413(13) |
| C2_53-F2_53 | 1.334(13) | C4_57-C7_57    | 1.507(13) |
| C2_53-F1_53 | 1.351(13) | C5_57-C6_57    | 1.506(13) |
| C3_53-F4_53 | 1.325(13) | C6_57-H6A_57   | 0.9800    |
| C3_53-F6_53 | 1.328(13) | C6_57-H6B_57   | 0.9800    |
| C3_53-F5_53 | 1.336(13) | C6_57-H6C_57   | 0.9800    |
| C4_53-F7_53 | 1.323(13) | C7_57-H7A_57   | 0.9800    |
| C4_53-F8_53 | 1.328(13) | C7_57-H7B_57   | 0.9800    |
| C4_53-F9_53 | 1.336(13) | C7_57-H7C_57   | 0.9800    |
| O1_54-C1_54 | 1.347(14) | C8_57-H8A_57   | 0.9800    |
| C1_54-C2_54 | 1.545(13) | C8_57-H8B_57   | 0.9800    |
| C1_54-C3_54 | 1.551(13) | C8_57-H8C_57   | 0.9800    |
| C1_54-C4_54 | 1.566(13) | C9_57-H9A_57   | 0.9800    |
| C2_54-F3_54 | 1.321(14) | C9_57-H9B_57   | 0.9800    |
| C2_54-F1_54 | 1.328(14) | C9_57-H9C_57   | 0.9800    |
| C2_54-F2_54 | 1.344(14) | C10_57-H10A_57 | 0.9800    |
| C3_54-F5_54 | 1.322(14) | C10_57-H10B_57 | 0.9800    |
| C3_54-F6_54 | 1.323(14) | C10_57-H10C_57 | 0.9800    |
| C3_54-F4_54 | 1.323(14) | O1_58-C1_58    | 1.352(13) |
| C4_54-F8_54 | 1.306(14) | C1_58-C4_58    | 1.535(12) |
| C4_54-F7_54 | 1.322(14) | C1_58-C2_58    | 1.565(12) |
| C4_54-F9_54 | 1.323(14) | C1_58-C3_58    | 1.568(13) |
| O1_55-C1_55 | 1.352(11) | C2_58-F2_58    | 1.316(13) |
| C1_55-C3_55 | 1.551(11) | C2_58-F3_58    | 1.335(13) |
| C1_55-C4_55 | 1.554(12) | C2_58-F1_58    | 1.335(13) |
| C1_55-C2_55 | 1.555(11) | C3_58-F4_58    | 1.317(13) |
| C2_55-F2_55 | 1.326(12) | C3_58-F5_58    | 1.320(13) |
| C2_55-F3_55 | 1.329(12) | C3_58-F6_58    | 1.326(13) |
| C2_55-F1_55 | 1.344(12) | C4_58-F7_58    | 1.333(13) |
| C3_55-F4_55 | 1.340(12) | C4_58-F9_58    | 1.335(13) |
| C3_55-F5_55 | 1.340(12) | C4_58-F8_58    | 1.353(14) |
| C3_55-F6_55 | 1.342(12) | O1_59-C1_59    | 1.356(13) |
| C4_55-F8_55 | 1.313(11) | C1_59-C2_59    | 1.546(12) |
| C4_55-F9_55 | 1.325(12) | C1_59-C3_59    | 1.550(12) |
| C4_55-F7_55 | 1.342(12) | C1_59-C4_59    | 1.552(12) |
| O1_56-C1_56 | 1.361(14) | C2_59-F1_59    | 1.328(13) |
| C1_56-C2_56 | 1.544(13) | C2_59-F3_59    | 1.329(13) |
| C1_56-C3_56 | 1.549(13) | C2_59-F2_59    | 1.336(13) |
| C1_56-C4_56 | 1.552(13) | C3_59-F5_59    | 1.330(13) |
| C2_56-F1_56 | 1.325(14) | C3_59-F6_59    | 1.333(13) |
| C2_56-F2_56 | 1.327(14) | C3_59-F4_59    | 1.339(13) |
| C2_56-F3_56 | 1.335(14) | C4_59-F7_59    | 1.320(13) |
| C3_56-F5_56 | 1.328(14) | C4_59-F9_59    | 1.334(13) |
| C3_56-F6_56 | 1.329(14) | C4_59-F8_59    | 1.335(13) |
| C3_56-F4_56 | 1.331(14) | O1_60-C1_60    | 1.343(13) |
| C4_56-F8_56 | 1.318(14) | C1_60-C4_60    | 1.553(13) |
| C4_56-F7_56 | 1.328(14) | C1_60-C2_60    | 1.555(13) |
| C4_56-F9_56 | 1.334(14) | C1_60-C3_60    | 1.566(13) |

|                       |                  |                  |            |
|-----------------------|------------------|------------------|------------|
| C2_60-F1_60           | 1.325(13)        | C5_9-Al1-C4_9    | 36.8(3)    |
| C2_60-F3_60           | 1.330(13)        | C5_57-Al1-C1_57  | 36.6(5)    |
| C2_60-F2_60           | 1.333(14)        | C5_57-Al1-C4_57  | 36.2(5)    |
| C3_60-F6_60           | 1.315(13)        | C1_57-Al1-C4_57  | 59.7(7)    |
| C3_60-F5_60           | 1.321(13)        | C5_57-Al1-C2_57  | 59.2(7)    |
| C3_60-F4_60           | 1.324(13)        | C1_57-Al1-C2_57  | 35.2(5)    |
| C4_60-F7_60           | 1.331(13)        | C4_57-Al1-C2_57  | 57.8(6)    |
| C4_60-F8_60           | 1.335(13)        | C5_57-Al1-C3_57  | 58.8(6)    |
| C4_60-F9_60           | 1.338(13)        | C1_57-Al1-C3_57  | 58.1(6)    |
| O1_61-C1_61           | 1.358(13)        | C4_57-Al1-C3_57  | 34.6(4)    |
| C1_61-C2_61           | 1.550(13)        | C2_57-Al1-C3_57  | 33.9(4)    |
| C1_61-C3_61           | 1.555(13)        | C2_9-Al1-Tl1     | 124.2(3)   |
| C1_61-C4_61           | 1.557(13)        | C1_9-Al1-Tl1     | 109.2(2)   |
| C2_61-F1_61           | 1.310(13)        | C3_9-Al1-Tl1     | 159.9(3)   |
| C2_61-F2_61           | 1.314(13)        | C5_57-Al1-Tl1    | 144.9(6)   |
| C2_61-F3_61           | 1.343(14)        | C5_9-Al1-Tl1     | 124.4(2)   |
| C3_61-F5_61           | 1.323(13)        | C4_9-Al1-Tl1     | 158.7(3)   |
| C3_61-F6_61           | 1.333(13)        | C1_57-Al1-Tl1    | 165.7(6)   |
| C3_61-F4_61           | 1.339(13)        | C4_57-Al1-Tl1    | 114.0(6)   |
| C4_61-F8_61           | 1.325(14)        | C2_57-Al1-Tl1    | 130.6(5)   |
| C4_61-F9_61           | 1.340(13)        | C3_57-Al1-Tl1    | 108.9(5)   |
| C4_61-F7_61           | 1.341(13)        | C5_11-Al8-C4_11  | 37.6(2)    |
| O1_62-C1_62           | 1.360(11)        | C5_11-Al8-C2_11  | 61.8(2)    |
| C1_62-C3_62           | 1.549(12)        | C4_11-Al8-C2_11  | 61.7(2)    |
| C1_62-C4_62           | 1.549(12)        | C5_11-Al8-C3_11  | 62.2(3)    |
| C1_62-C2_62           | 1.552(12)        | C4_11-Al8-C3_11  | 36.9(2)    |
| C2_62-F3_62           | 1.320(12)        | C2_11-Al8-C3_11  | 36.9(2)    |
| C2_62-F1_62           | 1.325(12)        | C5_11-Al8-C1_11  | 37.8(2)    |
| C2_62-F2_62           | 1.346(12)        | C4_11-Al8-C1_11  | 62.7(3)    |
| C3_62-F6_62           | 1.331(12)        | C2_11-Al8-C1_11  | 36.6(2)    |
| C3_62-F5_62           | 1.344(12)        | C3_11-Al8-C1_11  | 62.0(2)    |
| C3_62-F4_62           | 1.347(12)        | C5_11-Al8-Tl3    | 158.3(2)   |
| C4_62-F9_62           | 1.318(12)        | C4_11-Al8-Tl3    | 162.7(2)   |
| C4_62-F7_62           | 1.325(12)        | C2_11-Al8-Tl3    | 114.76(19) |
| C4_62-F8_62           | 1.350(12)        | C3_11-Al8-Tl3    | 129.59(19) |
|                       |                  | C1_11-Al8-Tl3    | 125.9(2)   |
| <b>Atom-Atom-Atom</b> | <b>Angle [°]</b> | C4_12-Al9-C5_12  | 37.5(2)    |
| Al2-Tl1-Al3           | 69.53(9)         | C4_12-Al9-C3_12  | 37.4(2)    |
| Al2-Tl1-Al1           | 70.52(8)         | C5_12-Al9-C3_12  | 62.1(3)    |
| Al3-Tl1-Al1           | 71.21(9)         | C4_12-Al9-C2_12  | 62.1(3)    |
| Al4-Tl2-Al6           | 69.58(9)         | C5_12-Al9-C2_12  | 61.6(3)    |
| Al4-Tl2-Al5           | 68.72(8)         | C3_12-Al9-C2_12  | 36.8(2)    |
| Al6-Tl2-Al5           | 69.17(10)        | C4_12-Al9-C1_12  | 62.1(3)    |
| Al8-Tl3-Al7           | 67.74(8)         | C5_12-Al9-C1_12  | 36.8(2)    |
| Al8-Tl3-Al9           | 67.45(8)         | C3_12-Al9-C1_12  | 61.6(3)    |
| Al7-Tl3-Al9           | 67.60(9)         | C2_12-Al9-C1_12  | 36.7(2)    |
| C2_9-Al1-C1_9         | 38.0(3)          | C4_12-Al9-Tl3    | 155.6(2)   |
| C2_9-Al1-C3_9         | 38.0(3)          | C5_12-Al9-Tl3    | 163.2(2)   |
| C1_9-Al1-C3_9         | 62.9(3)          | C3_12-Al9-Tl3    | 122.7(2)   |
| C2_9-Al1-C5_9         | 62.6(3)          | C2_12-Al9-Tl3    | 111.4(2)   |
| C1_9-Al1-C5_9         | 37.3(3)          | C1_12-Al9-Tl3    | 128.3(2)   |
| C3_9-Al1-C5_9         | 61.8(3)          | O1_29-Al10-O1_28 | 110.3(5)   |
| C2_9-Al1-C4_9         | 62.5(3)          | O1_29-Al10-O1_40 | 111.1(4)   |
| C1_9-Al1-C4_9         | 62.2(3)          | O1_28-Al10-O1_40 | 112.7(6)   |
| C3_9-Al1-C4_9         | 36.7(3)          | O1_46-Al10-O1_43 | 114.1(9)   |

|                  |           |                 |            |
|------------------|-----------|-----------------|------------|
| O1_46-AI10-O1_45 | 106.5(7)  | O1_47-AI14-O1_3 | 108.5(13)  |
| O1_43-AI10-O1_45 | 110.9(10) | C4_7-AI2-C3_7   | 36.37(19)  |
| O1_46-AI10-O1_35 | 115.4(8)  | C4_7-AI2-C5_7   | 36.1(2)    |
| O1_43-AI10-O1_35 | 104.2(9)  | C3_7-AI2-C5_7   | 60.2(2)    |
| O1_45-AI10-O1_35 | 105.5(6)  | C4_7-AI2-C2_7   | 60.2(2)    |
| O1_29-AI10-O1_30 | 110.7(9)  | C3_7-AI2-C2_7   | 36.02(19)  |
| O1_28-AI10-O1_30 | 106.2(9)  | C5_7-AI2-C2_7   | 60.0(2)    |
| O1_40-AI10-O1_30 | 105.6(8)  | C4_7-AI2-C1_7   | 60.0(2)    |
| O1_26-AI11-O1_24 | 109.6(5)  | C3_7-AI2-C1_7   | 60.0(2)    |
| O1_26-AI11-O1_25 | 107.9(7)  | C5_7-AI2-C1_7   | 35.9(2)    |
| O1_24-AI11-O1_25 | 110.5(3)  | C2_7-AI2-C1_7   | 35.9(2)    |
| O1_54-AI11-O1_34 | 106.5(14) | C4_7-AI2-TI1    | 153.99(17) |
| O1_54-AI11-O1_33 | 121.0(13) | C3_7-AI2-TI1    | 168.70(17) |
| O1_34-AI11-O1_33 | 99.7(8)   | C5_7-AI2-TI1    | 125.33(18) |
| O1_26-AI11-O1_27 | 115.1(6)  | C2_7-AI2-TI1    | 135.19(17) |
| O1_24-AI11-O1_27 | 102.9(4)  | C1_7-AI2-TI1    | 117.60(17) |
| O1_25-AI11-O1_27 | 110.8(3)  | C4_8-AI3-C5_8   | 37.5(2)    |
| O1_56-AI12-O1_2  | 113(2)    | C4_8-AI3-C3_8   | 38.0(2)    |
| O1_56-AI12-O1_36 | 120(2)    | C5_8-AI3-C3_8   | 62.1(2)    |
| O1_2-AI12-O1_36  | 109.1(16) | C4_8-AI3-C1_8   | 62.2(2)    |
| O1_22-AI12-O1_20 | 117.1(7)  | C5_8-AI3-C1_8   | 37.0(2)    |
| O1_22-AI12-O1_21 | 84.7(7)   | C3_8-AI3-C1_8   | 61.1(2)    |
| O1_20-AI12-O1_21 | 113.2(5)  | C4_8-AI3-C2_8   | 62.2(2)    |
| O1_22-AI12-O1_23 | 110.8(9)  | C5_8-AI3-C2_8   | 61.2(3)    |
| O1_20-AI12-O1_23 | 108.7(8)  | C3_8-AI3-C2_8   | 36.6(2)    |
| O1_21-AI12-O1_23 | 121.0(8)  | C1_8-AI3-C2_8   | 36.0(2)    |
| O1_56-AI12-O1_55 | 112(2)    | C4_8-AI3-TI1    | 167.5(2)   |
| O1_2-AI12-O1_55  | 98.4(14)  | C5_8-AI3-TI1    | 141.7(2)   |
| O1_36-AI12-O1_55 | 102.3(9)  | C3_8-AI3-TI1    | 152.4(2)   |
| O1_49-AI13-O1_44 | 104.6(13) | C1_8-AI3-TI1    | 125.5(2)   |
| O1_49-AI13-O1_50 | 113.1(12) | C2_8-AI3-TI1    | 130.14(19) |
| O1_44-AI13-O1_50 | 108.7(14) | C3_4-AI4-C2_4   | 36.4(2)    |
| O1_58-AI13-O1_60 | 108.7(15) | C3_4-AI4-C1_4   | 60.5(2)    |
| O1_38-AI13-O1_32 | 121.5(10) | C2_4-AI4-C1_4   | 36.4(2)    |
| O1_38-AI13-O1_31 | 110.2(7)  | C3_4-AI4-C4_4   | 36.9(2)    |
| O1_32-AI13-O1_31 | 105.5(8)  | C2_4-AI4-C4_4   | 61.2(2)    |
| O1_58-AI13-O1_51 | 78.2(11)  | C1_4-AI4-C4_4   | 60.6(2)    |
| O1_60-AI13-O1_51 | 102.6(13) | C3_4-AI4-C5_4   | 60.8(2)    |
| O1_49-AI13-O1_39 | 100.2(10) | C2_4-AI4-C5_4   | 60.8(2)    |
| O1_44-AI13-O1_39 | 124.9(10) | C1_4-AI4-C5_4   | 36.2(2)    |
| O1_50-AI13-O1_39 | 105.2(11) | C4_4-AI4-C5_4   | 36.3(2)    |
| O1_38-AI13-O1_37 | 109.3(8)  | C3_4-AI4-TI2    | 152.2(2)   |
| O1_32-AI13-O1_37 | 103.9(9)  | C2_4-AI4-TI2    | 170.88(19) |
| O1_31-AI13-O1_37 | 104.9(6)  | C1_4-AI4-TI2    | 137.02(18) |
| O1_48-AI14-O1_15 | 109.5(12) | C4_4-AI4-TI2    | 123.9(2)   |
| O1_19-AI14-O1_16 | 105.6(8)  | C5_4-AI4-TI2    | 117.91(18) |
| O1_19-AI14-O1_17 | 108.8(6)  | C2_5-AI5-C3_5   | 37.2(2)    |
| O1_16-AI14-O1_17 | 118.3(6)  | C2_5-AI5-C5_5   | 61.8(3)    |
| O1_48-AI14-O1_47 | 118.6(10) | C3_5-AI5-C5_5   | 62.3(3)    |
| O1_15-AI14-O1_47 | 109.3(10) | C2_5-AI5-C4_5   | 61.7(3)    |
| O1_19-AI14-O1_18 | 106.8(8)  | C3_5-AI5-C4_5   | 37.2(2)    |
| O1_16-AI14-O1_18 | 108.9(6)  | C5_5-AI5-C4_5   | 37.1(2)    |
| O1_17-AI14-O1_18 | 107.9(5)  | C2_5-AI5-C1_5   | 36.9(2)    |
| O1_48-AI14-O1_3  | 120.7(13) | C3_5-AI5-C1_5   | 62.2(3)    |
| O1_15-AI14-O1_3  | 84.9(14)  | C5_5-AI5-C1_5   | 37.1(2)    |

|                 |            |                   |          |
|-----------------|------------|-------------------|----------|
| C4_5-AI5-C1_5   | 61.9(3)    | C5_4-C4_4-C7_4    | 125.0(8) |
| C2_5-AI5-TI2    | 151.0(2)   | C3_4-C4_4-C7_4    | 127.8(8) |
| C3_5-AI5-TI2    | 171.0(2)   | C5_4-C4_4-AI4     | 72.0(4)  |
| C5_5-AI5-TI2    | 115.8(2)   | C3_4-C4_4-AI4     | 70.9(4)  |
| C4_5-AI5-TI2    | 135.9(2)   | C7_4-C4_4-AI4     | 122.7(5) |
| C1_5-AI5-TI2    | 122.2(2)   | C1_4-C5_4-C4_4    | 108.1(5) |
| C3_6-AI6-C4_6   | 37.7(2)    | C1_4-C5_4-C6_4    | 125.4(7) |
| C3_6-AI6-C2_6   | 37.2(3)    | C4_4-C5_4-C6_4    | 126.4(7) |
| C4_6-AI6-C2_6   | 62.5(3)    | C1_4-C5_4-AI4     | 71.5(3)  |
| C3_6-AI6-C1_6   | 61.7(3)    | C4_4-C5_4-AI4     | 71.7(4)  |
| C4_6-AI6-C1_6   | 62.0(3)    | C6_4-C5_4-AI4     | 123.5(5) |
| C2_6-AI6-C1_6   | 36.9(2)    | C5_4-C6_4-H6A_4   | 109.5    |
| C3_6-AI6-C5_6   | 62.0(2)    | C5_4-C6_4-H6B_4   | 109.5    |
| C4_6-AI6-C5_6   | 36.9(2)    | H6A_4-C6_4-H6B_4  | 109.5    |
| C2_6-AI6-C5_6   | 62.0(3)    | C5_4-C6_4-H6C_4   | 109.5    |
| C1_6-AI6-C5_6   | 37.1(2)    | H6A_4-C6_4-H6C_4  | 109.5    |
| C3_6-AI6-TI2    | 155.6(3)   | H6B_4-C6_4-H6C_4  | 109.5    |
| C4_6-AI6-TI2    | 127.6(3)   | C4_4-C7_4-H7A_4   | 109.5    |
| C2_6-AI6-TI2    | 167.2(3)   | C4_4-C7_4-H7B_4   | 109.5    |
| C1_6-AI6-TI2    | 136.44(19) | H7A_4-C7_4-H7B_4  | 109.5    |
| C5_6-AI6-TI2    | 120.0(2)   | C4_4-C7_4-H7C_4   | 109.5    |
| C4_10-AI7-C2_10 | 62.5(3)    | H7A_4-C7_4-H7C_4  | 109.5    |
| C4_10-AI7-C3_10 | 37.7(3)    | H7B_4-C7_4-H7C_4  | 109.5    |
| C2_10-AI7-C3_10 | 37.5(3)    | C3_4-C8_4-H8A_4   | 109.5    |
| C4_10-AI7-C1_10 | 61.9(3)    | C3_4-C8_4-H8B_4   | 109.5    |
| C2_10-AI7-C1_10 | 37.0(3)    | H8A_4-C8_4-H8B_4  | 109.5    |
| C3_10-AI7-C1_10 | 62.2(3)    | C3_4-C8_4-H8C_4   | 109.5    |
| C4_10-AI7-C5_10 | 37.3(3)    | H8A_4-C8_4-H8C_4  | 109.5    |
| C2_10-AI7-C5_10 | 62.0(3)    | H8B_4-C8_4-H8C_4  | 109.5    |
| C3_10-AI7-C5_10 | 62.5(3)    | C2_4-C9_4-H9A_4   | 109.5    |
| C1_10-AI7-C5_10 | 36.8(2)    | C2_4-C9_4-H9B_4   | 109.5    |
| C4_10-AI7-TI3   | 119.8(2)   | H9A_4-C9_4-H9B_4  | 109.5    |
| C2_10-AI7-TI3   | 154.1(3)   | C2_4-C9_4-H9C_4   | 109.5    |
| C3_10-AI7-TI3   | 126.7(3)   | H9A_4-C9_4-H9C_4  | 109.5    |
| C1_10-AI7-TI3   | 168.9(2)   | H9B_4-C9_4-H9C_4  | 109.5    |
| C5_10-AI7-TI3   | 137.4(2)   | C1_4-C10_4-H10A_4 | 109.5    |
| C5_4-C1_4-C2_4  | 108.7(5)   | C1_4-C10_4-H10B_4 | 109.5    |
| C5_4-C1_4-C10_4 | 125.9(7)   | H10A_4-C10_4-     | 109.5    |
| C2_4-C1_4-C10_4 | 125.4(6)   | H10B_4            |          |
| C5_4-C1_4-AI4   | 72.3(4)    | C1_4-C10_4-H10C_4 | 109.5    |
| C2_4-C1_4-AI4   | 71.5(3)    | H10A_4-C10_4-     | 109.5    |
| C10_4-C1_4-AI4  | 122.6(5)   | H10C_4            |          |
| C3_4-C2_4-C1_4  | 107.6(5)   | H10B_4-C10_4-     | 109.5    |
| C3_4-C2_4-C9_4  | 126.5(7)   | H10C_4            |          |
| C1_4-C2_4-C9_4  | 125.7(7)   | C2_5-C1_5-C5_5    | 107.4(6) |
| C3_4-C2_4-AI4   | 71.6(3)    | C2_5-C1_5-C10_5   | 126.5(7) |
| C1_4-C2_4-AI4   | 72.2(3)    | C5_5-C1_5-C10_5   | 126.0(7) |
| C9_4-C2_4-AI4   | 125.5(5)   | C2_5-C1_5-AI5     | 70.7(4)  |
| C2_4-C3_4-C4_4  | 108.4(5)   | C5_5-C1_5-AI5     | 71.1(4)  |
| C2_4-C3_4-C8_4  | 125.8(8)   | C10_5-C1_5-AI5    | 121.8(5) |
| C4_4-C3_4-C8_4  | 125.6(8)   | C1_5-C2_5-C3_5    | 109.3(6) |
| C2_4-C3_4-AI4   | 72.0(3)    | C1_5-C2_5-C9_5    | 125.2(7) |
| C4_4-C3_4-AI4   | 72.2(4)    | C3_5-C2_5-C9_5    | 125.4(7) |
| C8_4-C3_4-AI4   | 125.6(5)   | C1_5-C2_5-AI5     | 72.4(4)  |
| C5_4-C4_4-C3_4  | 107.2(5)   | C3_5-C2_5-AI5     | 71.6(4)  |

|                   |          |                   |          |
|-------------------|----------|-------------------|----------|
| C9_5-C2_5-AI5     | 125.7(5) | C2_6-C1_6-AI6     | 70.8(4)  |
| C2_5-C3_5-C4_5    | 107.0(6) | C5_6-C1_6-AI6     | 71.6(4)  |
| C2_5-C3_5-C8_5    | 125.4(7) | C10_6-C1_6-AI6    | 125.5(5) |
| C4_5-C3_5-C8_5    | 127.5(7) | C3_6-C2_6-C1_6    | 107.8(7) |
| C2_5-C3_5-AI5     | 71.1(4)  | C3_6-C2_6-C9_6    | 125.6(7) |
| C4_5-C3_5-AI5     | 71.7(4)  | C1_6-C2_6-C9_6    | 126.5(8) |
| C8_5-C3_5-AI5     | 125.6(5) | C3_6-C2_6-AI6     | 70.7(4)  |
| C3_5-C4_5-C5_5    | 108.4(6) | C1_6-C2_6-AI6     | 72.3(4)  |
| C3_5-C4_5-C7_5    | 125.5(8) | C9_6-C2_6-AI6     | 126.1(5) |
| C5_5-C4_5-C7_5    | 126.0(8) | C2_6-C3_6-C4_6    | 108.5(6) |
| C3_5-C4_5-AI5     | 71.1(4)  | C2_6-C3_6-C8_6    | 123.8(9) |
| C5_5-C4_5-AI5     | 71.4(5)  | C4_6-C3_6-C8_6    | 127.6(9) |
| C7_5-C4_5-AI5     | 126.7(6) | C2_6-C3_6-AI6     | 72.2(4)  |
| C4_5-C5_5-C1_5    | 107.9(6) | C4_6-C3_6-AI6     | 71.6(4)  |
| C4_5-C5_5-C6_5    | 125.2(7) | C8_6-C3_6-AI6     | 125.1(5) |
| C1_5-C5_5-C6_5    | 126.8(7) | C5_6-C4_6-C3_6    | 107.6(7) |
| C4_5-C5_5-AI5     | 71.5(4)  | C5_6-C4_6-C7_6    | 125.0(8) |
| C1_5-C5_5-AI5     | 71.8(4)  | C3_6-C4_6-C7_6    | 127.3(8) |
| C6_5-C5_5-AI5     | 124.1(6) | C5_6-C4_6-AI6     | 72.7(4)  |
| C5_5-C6_5-H6A_5   | 109.5    | C3_6-C4_6-AI6     | 70.7(4)  |
| C5_5-C6_5-H6B_5   | 109.5    | C7_6-C4_6-AI6     | 125.1(6) |
| H6A_5-C6_5-H6B_5  | 109.5    | C4_6-C5_6-C1_6    | 107.8(6) |
| C5_5-C6_5-H6C_5   | 109.5    | C4_6-C5_6-C6_6    | 127.7(8) |
| H6A_5-C6_5-H6C_5  | 109.5    | C1_6-C5_6-C6_6    | 124.5(7) |
| H6B_5-C6_5-H6C_5  | 109.5    | C4_6-C5_6-AI6     | 70.4(4)  |
| C4_5-C7_5-H7A_5   | 109.5    | C1_6-C5_6-AI6     | 71.3(4)  |
| C4_5-C7_5-H7B_5   | 109.5    | C6_6-C5_6-AI6     | 124.7(5) |
| H7A_5-C7_5-H7B_5  | 109.5    | C5_6-C6_6-H6A_6   | 109.5    |
| C4_5-C7_5-H7C_5   | 109.5    | C5_6-C6_6-H6B_6   | 109.5    |
| H7A_5-C7_5-H7C_5  | 109.5    | H6A_6-C6_6-H6B_6  | 109.5    |
| H7B_5-C7_5-H7C_5  | 109.5    | C5_6-C6_6-H6C_6   | 109.5    |
| C3_5-C8_5-H8A_5   | 109.5    | H6A_6-C6_6-H6C_6  | 109.5    |
| C3_5-C8_5-H8B_5   | 109.5    | H6B_6-C6_6-H6C_6  | 109.5    |
| H8A_5-C8_5-H8B_5  | 109.5    | C4_6-C7_6-H7A_6   | 109.5    |
| C3_5-C8_5-H8C_5   | 109.5    | C4_6-C7_6-H7B_6   | 109.5    |
| H8A_5-C8_5-H8C_5  | 109.5    | H7A_6-C7_6-H7B_6  | 109.5    |
| H8B_5-C8_5-H8C_5  | 109.5    | C4_6-C7_6-H7C_6   | 109.5    |
| C2_5-C9_5-H9A_5   | 109.5    | H7A_6-C7_6-H7C_6  | 109.5    |
| C2_5-C9_5-H9B_5   | 109.5    | H7B_6-C7_6-H7C_6  | 109.5    |
| H9A_5-C9_5-H9B_5  | 109.5    | C3_6-C8_6-H8A_6   | 109.5    |
| C2_5-C9_5-H9C_5   | 109.5    | C3_6-C8_6-H8B_6   | 109.5    |
| H9A_5-C9_5-H9C_5  | 109.5    | H8A_6-C8_6-H8B_6  | 109.5    |
| H9B_5-C9_5-H9C_5  | 109.5    | C3_6-C8_6-H8C_6   | 109.5    |
| C1_5-C10_5-H10A_5 | 109.5    | H8A_6-C8_6-H8C_6  | 109.5    |
| C1_5-C10_5-H10B_5 | 109.5    | H8B_6-C8_6-H8C_6  | 109.5    |
| H10A_5-C10_5-     | 109.5    | C2_6-C9_6-H9A_6   | 109.5    |
| H10B_5            | 109.5    | C2_6-C9_6-H9B_6   | 109.5    |
| C1_5-C10_5-H10C_5 | 109.5    | H9A_6-C9_6-H9B_6  | 109.5    |
| H10A_5-C10_5-     | 109.5    | C2_6-C9_6-H9C_6   | 109.5    |
| H10C_5            | 109.5    | H9A_6-C9_6-H9C_6  | 109.5    |
| H10B_5-C10_5-     | 109.5    | H9B_6-C9_6-H9C_6  | 109.5    |
| H10C_5            | 109.5    | C1_6-C10_6-H10A_6 | 109.5    |
| C2_6-C1_6-C5_6    | 108.3(6) | C1_6-C10_6-H10B_6 | 109.5    |
| C2_6-C1_6-C10_6   | 127.0(8) | H10A_6-C10_6-     | 109.5    |
| C5_6-C1_6-C10_6   | 124.6(7) | H10B_6            | 109.5    |



|                   |          |                   |          |
|-------------------|----------|-------------------|----------|
| C1_6-C10_6-H10C_6 | 109.5    | H9A_7-C9_7-H9B_7  | 109.5    |
| H10A_6-C10_6-     |          | C2_7-C9_7-H9C_7   | 109.5    |
| H10C_6            | 109.5    | H9A_7-C9_7-H9C_7  | 109.5    |
| H10B_6-C10_6-     |          | H9B_7-C9_7-H9C_7  | 109.5    |
| H10C_6            | 109.5    | C1_7-C10_7-H10A_7 | 109.5    |
| C2_7-C1_7-C5_7    | 107.9(5) | C1_7-C10_7-H10B_7 | 109.5    |
| C2_7-C1_7-C10_7   | 126.1(7) | H10A_7-C10_7-     |          |
| C5_7-C1_7-C10_7   | 125.9(7) | H10B_7            | 109.5    |
| C2_7-C1_7-AI2     | 71.6(3)  | C1_7-C10_7-H10C_7 | 109.5    |
| C5_7-C1_7-AI2     | 71.4(4)  | H10A_7-C10_7-     |          |
| C10_7-C1_7-AI2    | 123.3(5) | H10C_7            | 109.5    |
| C3_7-C2_7-C1_7    | 108.0(5) | H10B_7-C10_7-     |          |
| C3_7-C2_7-C9_7    | 126.3(6) | H10C_7            | 109.5    |
| C1_7-C2_7-C9_7    | 125.6(6) | C2_8-C1_8-C5_8    | 108.4(6) |
| C3_7-C2_7-AI2     | 71.3(3)  | C2_8-C1_8-C10_8   | 126.0(8) |
| C1_7-C2_7-AI2     | 72.5(3)  | C5_8-C1_8-C10_8   | 125.5(8) |
| C9_7-C2_7-AI2     | 123.3(4) | C2_8-C1_8-AI3     | 72.4(4)  |
| C2_7-C3_7-C4_7    | 108.0(5) | C5_8-C1_8-AI3     | 70.2(4)  |
| C2_7-C3_7-C8_7    | 125.7(5) | C10_8-C1_8-AI3    | 124.5(5) |
| C4_7-C3_7-C8_7    | 126.2(5) | C1_8-C2_8-C3_8    | 108.7(6) |
| C2_7-C3_7-AI2     | 72.6(3)  | C1_8-C2_8-C9_8    | 125.9(7) |
| C4_7-C3_7-AI2     | 71.8(3)  | C3_8-C2_8-C9_8    | 125.4(7) |
| C8_7-C3_7-AI2     | 124.1(4) | C1_8-C2_8-AI3     | 71.6(4)  |
| C5_7-C4_7-C3_7    | 107.8(5) | C3_8-C2_8-AI3     | 70.3(3)  |
| C5_7-C4_7-C7_7    | 126.9(6) | C9_8-C2_8-AI3     | 125.7(5) |
| C3_7-C4_7-C7_7    | 125.2(6) | C2_8-C3_8-C4_8    | 107.7(5) |
| C5_7-C4_7-AI2     | 72.5(4)  | C2_8-C3_8-C8_8    | 126.3(7) |
| C3_7-C4_7-AI2     | 71.8(3)  | C4_8-C3_8-C8_8    | 125.9(6) |
| C7_7-C4_7-AI2     | 123.9(5) | C2_8-C3_8-AI3     | 73.0(3)  |
| C4_7-C5_7-C1_7    | 108.2(5) | C4_8-C3_8-AI3     | 69.5(4)  |
| C4_7-C5_7-C6_7    | 125.4(7) | C8_8-C3_8-AI3     | 125.3(5) |
| C1_7-C5_7-C6_7    | 126.4(7) | C5_8-C4_8-C3_8    | 107.0(6) |
| C4_7-C5_7-AI2     | 71.5(4)  | C5_8-C4_8-C7_8    | 127.8(7) |
| C1_7-C5_7-AI2     | 72.7(4)  | C3_8-C4_8-C7_8    | 125.1(7) |
| C6_7-C5_7-AI2     | 122.9(5) | C5_8-C4_8-AI3     | 72.5(4)  |
| C5_7-C6_7-H6A_7   | 109.5    | C3_8-C4_8-AI3     | 72.6(4)  |
| C5_7-C6_7-H6B_7   | 109.5    | C7_8-C4_8-AI3     | 123.2(5) |
| H6A_7-C6_7-H6B_7  | 109.5    | C4_8-C5_8-C1_8    | 108.2(6) |
| C5_7-C6_7-H6C_7   | 109.5    | C4_8-C5_8-C6_8    | 125.6(8) |
| H6A_7-C6_7-H6C_7  | 109.5    | C1_8-C5_8-C6_8    | 126.3(8) |
| H6B_7-C6_7-H6C_7  | 109.5    | C4_8-C5_8-AI3     | 70.0(4)  |
| C4_7-C7_7-H7A_7   | 109.5    | C1_8-C5_8-AI3     | 72.8(4)  |
| C4_7-C7_7-H7B_7   | 109.5    | C6_8-C5_8-AI3     | 123.6(6) |
| H7A_7-C7_7-H7B_7  | 109.5    | C5_8-C6_8-H6A_8   | 109.5    |
| C4_7-C7_7-H7C_7   | 109.5    | C5_8-C6_8-H6B_8   | 109.5    |
| H7A_7-C7_7-H7C_7  | 109.5    | H6A_8-C6_8-H6B_8  | 109.5    |
| H7B_7-C7_7-H7C_7  | 109.5    | C5_8-C6_8-H6C_8   | 109.5    |
| C3_7-C8_7-H8A_7   | 109.5    | H6A_8-C6_8-H6C_8  | 109.5    |
| C3_7-C8_7-H8B_7   | 109.5    | H6B_8-C6_8-H6C_8  | 109.5    |
| H8A_7-C8_7-H8B_7  | 109.5    | C4_8-C7_8-H7A_8   | 109.5    |
| C3_7-C8_7-H8C_7   | 109.5    | C4_8-C7_8-H7B_8   | 109.5    |
| H8A_7-C8_7-H8C_7  | 109.5    | H7A_8-C7_8-H7B_8  | 109.5    |
| H8B_7-C8_7-H8C_7  | 109.5    | C4_8-C7_8-H7C_8   | 109.5    |
| C2_7-C9_7-H9A_7   | 109.5    | H7A_8-C7_8-H7C_8  | 109.5    |
| C2_7-C9_7-H9B_7   | 109.5    | H7B_8-C7_8-H7C_8  | 109.5    |

|                   |           |                    |           |
|-------------------|-----------|--------------------|-----------|
| C3_8-C8_8-H8A_8   | 109.5     | H6A_9-C6_9-H6C_9   | 109.5     |
| C3_8-C8_8-H8B_8   | 109.5     | H6B_9-C6_9-H6C_9   | 109.5     |
| H8A_8-C8_8-H8B_8  | 109.5     | C4_9-C7_9-H7A_9    | 109.5     |
| C3_8-C8_8-H8C_8   | 109.5     | C4_9-C7_9-H7B_9    | 109.5     |
| H8A_8-C8_8-H8C_8  | 109.5     | H7A_9-C7_9-H7B_9   | 109.5     |
| H8B_8-C8_8-H8C_8  | 109.5     | C4_9-C7_9-H7C_9    | 109.5     |
| C2_8-C9_8-H9A_8   | 109.5     | H7A_9-C7_9-H7C_9   | 109.5     |
| C2_8-C9_8-H9B_8   | 109.5     | H7B_9-C7_9-H7C_9   | 109.5     |
| H9A_8-C9_8-H9B_8  | 109.5     | C3_9-C8_9-H8A_9    | 109.5     |
| C2_8-C9_8-H9C_8   | 109.5     | C3_9-C8_9-H8B_9    | 109.5     |
| H9A_8-C9_8-H9C_8  | 109.5     | H8A_9-C8_9-H8B_9   | 109.5     |
| H9B_8-C9_8-H9C_8  | 109.5     | C3_9-C8_9-H8C_9    | 109.5     |
| C1_8-C10_8-H10A_8 | 109.5     | H8A_9-C8_9-H8C_9   | 109.5     |
| C1_8-C10_8-H10B_8 | 109.5     | H8B_9-C8_9-H8C_9   | 109.5     |
| H10A_8-C10_8-     |           | C2_9-C9_9-H9A_9    | 109.5     |
| H10B_8            | 109.5     | C2_9-C9_9-H9B_9    | 109.5     |
| C1_8-C10_8-H10C_8 | 109.5     | H9A_9-C9_9-H9B_9   | 109.5     |
| H10A_8-C10_8-     |           | C2_9-C9_9-H9C_9    | 109.5     |
| H10C_8            | 109.5     | H9A_9-C9_9-H9C_9   | 109.5     |
| H10B_8-C10_8-     |           | H9B_9-C9_9-H9C_9   | 109.5     |
| H10C_8            | 109.5     | C1_9-C10_9-H10A_9  | 109.5     |
| C5_9-C1_9-C2_9    | 107.5(7)  | C1_9-C10_9-H10B_9  | 109.5     |
| C5_9-C1_9-C10_9   | 124.1(9)  | H10A_9-C10_9-      |           |
| C2_9-C1_9-C10_9   | 128.4(9)  | H10B_9             | 109.5     |
| C5_9-C1_9-AI1     | 72.8(5)   | C1_9-C10_9-H10C_9  | 109.5     |
| C2_9-C1_9-AI1     | 70.0(4)   | H10A_9-C10_9-      |           |
| C10_9-C1_9-AI1    | 122.8(6)  | H10C_9             | 109.5     |
| C1_9-C2_9-C3_9    | 107.7(7)  | H10B_9-C10_9-      |           |
| C1_9-C2_9-C9_9    | 126.1(10) | H10C_9             | 109.5     |
| C3_9-C2_9-C9_9    | 126.2(10) | C5_10-C1_10-C2_10  | 108.9(7)  |
| C1_9-C2_9-AI1     | 72.0(5)   | C5_10-C1_10-C10_10 | 125.6(8)  |
| C3_9-C2_9-AI1     | 72.3(5)   | C2_10-C1_10-C10_10 | 125.5(7)  |
| C9_9-C2_9-AI1     | 123.2(7)  | C5_10-C1_10-AI7    | 71.7(5)   |
| C4_9-C3_9-C2_9    | 108.3(7)  | C2_10-C1_10-AI7    | 71.1(4)   |
| C4_9-C3_9-C8_9    | 124.2(9)  | C10_10-C1_10-AI7   | 125.5(6)  |
| C2_9-C3_9-C8_9    | 127.3(10) | C1_10-C2_10-C3_10  | 108.1(6)  |
| C4_9-C3_9-AI1     | 73.2(5)   | C1_10-C2_10-C9_10  | 123.9(8)  |
| C2_9-C3_9-AI1     | 69.7(4)   | C3_10-C2_10-C9_10  | 127.9(9)  |
| C8_9-C3_9-AI1     | 126.6(7)  | C1_10-C2_10-AI7    | 71.9(4)   |
| C3_9-C4_9-C5_9    | 108.1(7)  | C3_10-C2_10-AI7    | 71.3(4)   |
| C3_9-C4_9-C7_9    | 126.8(9)  | C9_10-C2_10-AI7    | 125.4(7)  |
| C5_9-C4_9-C7_9    | 125.0(9)  | C2_10-C3_10-C4_10  | 107.1(7)  |
| C3_9-C4_9-AI1     | 70.1(5)   | C2_10-C3_10-C8_10  | 125.4(10) |
| C5_9-C4_9-AI1     | 71.2(5)   | C4_10-C3_10-C8_10  | 127.5(10) |
| C7_9-C4_9-AI1     | 127.2(7)  | C2_10-C3_10-AI7    | 71.2(4)   |
| C4_9-C5_9-C1_9    | 108.4(7)  | C4_10-C3_10-AI7    | 71.0(5)   |
| C4_9-C5_9-C6_9    | 125.4(9)  | C8_10-C3_10-AI7    | 124.2(7)  |
| C1_9-C5_9-C6_9    | 126.2(9)  | C5_10-C4_10-C3_10  | 108.1(7)  |
| C4_9-C5_9-AI1     | 72.0(5)   | C5_10-C4_10-C7_10  | 126.0(10) |
| C1_9-C5_9-AI1     | 69.9(5)   | C3_10-C4_10-C7_10  | 125.9(10) |
| C6_9-C5_9-AI1     | 125.5(7)  | C5_10-C4_10-AI7    | 72.1(5)   |
| C5_9-C6_9-H6A_9   | 109.5     | C3_10-C4_10-AI7    | 71.3(5)   |
| C5_9-C6_9-H6B_9   | 109.5     | C7_10-C4_10-AI7    | 123.1(7)  |
| H6A_9-C6_9-H6B_9  | 109.5     | C1_10-C5_10-C4_10  | 107.8(7)  |
| C5_9-C6_9-H6C_9   | 109.5     | C1_10-C5_10-C6_10  | 126.8(9)  |

|                    |          |                    |          |
|--------------------|----------|--------------------|----------|
| C4_10-C5_10-C6_10  | 125.3(8) | C2_11-C1_11-AI8    | 71.5(3)  |
| C1_10-C5_10-AI7    | 71.5(5)  | C5_11-C1_11-AI8    | 69.9(4)  |
| C4_10-C5_10-AI7    | 70.7(5)  | C10_11-C1_11-AI8   | 123.2(5) |
| C6_10-C5_10-AI7    | 124.0(7) | C1_11-C2_11-C3_11  | 109.7(6) |
| C5_10-C6_10-H6A_10 | 109.5    | C1_11-C2_11-C9_11  | 125.1(6) |
| C5_10-C6_10-H6B_10 | 109.5    | C3_11-C2_11-C9_11  | 125.2(6) |
| H6A_10-C6_10-      |          | C1_11-C2_11-AI8    | 71.8(3)  |
| H6B_10             | 109.5    | C3_11-C2_11-AI8    | 71.7(3)  |
| C5_10-C6_10-H6C_10 | 109.5    | C9_11-C2_11-AI8    | 122.7(4) |
| H6A_10-C6_10-      |          | C4_11-C3_11-C2_11  | 107.5(6) |
| H6C_10             | 109.5    | C4_11-C3_11-C8_11  | 127.1(7) |
| H6B_10-C6_10-      |          | C2_11-C3_11-C8_11  | 125.4(6) |
| H6C_10             | 109.5    | C4_11-C3_11-AI8    | 70.5(4)  |
| C4_10-C7_10-H7A_10 | 109.5    | C2_11-C3_11-AI8    | 71.4(3)  |
| C4_10-C7_10-H7B_10 | 109.5    | C8_11-C3_11-AI8    | 123.6(5) |
| H7A_10-C7_10-      |          | C3_11-C4_11-C5_11  | 108.3(6) |
| H7B_10             | 109.5    | C3_11-C4_11-C7_11  | 126.6(8) |
| C4_10-C7_10-H7C_10 | 109.5    | C5_11-C4_11-C7_11  | 125.0(7) |
| H7A_10-C7_10-      |          | C3_11-C4_11-AI8    | 72.6(4)  |
| H7C_10             | 109.5    | C5_11-C4_11-AI8    | 71.0(4)  |
| H7B_10-C7_10-      |          | C7_11-C4_11-AI8    | 125.5(5) |
| H7C_10             | 109.5    | C4_11-C5_11-C1_11  | 107.8(6) |
| C3_10-C8_10-H8A_10 | 109.5    | C4_11-C5_11-C6_11  | 126.8(8) |
| C3_10-C8_10-H8B_10 | 109.5    | C1_11-C5_11-C6_11  | 125.2(8) |
| H8A_10-C8_10-      |          | C4_11-C5_11-AI8    | 71.3(4)  |
| H8B_10             | 109.5    | C1_11-C5_11-AI8    | 72.3(4)  |
| C3_10-C8_10-H8C_10 | 109.5    | C6_11-C5_11-AI8    | 125.9(6) |
| H8A_10-C8_10-      |          | C5_11-C6_11-H6A_11 | 109.5    |
| H8C_10             | 109.5    | C5_11-C6_11-H6B_11 | 109.5    |
| H8B_10-C8_10-      |          | H6A_11-C6_11-      |          |
| H8C_10             | 109.5    | H6B_11             | 109.5    |
| C2_10-C9_10-H9A_10 | 109.5    | C5_11-C6_11-H6C_11 | 109.5    |
| C2_10-C9_10-H9B_10 | 109.5    | H6A_11-C6_11-      |          |
| H9A_10-C9_10-      |          | H6C_11             | 109.5    |
| H9B_10             | 109.5    | H6B_11-C6_11-      |          |
| C2_10-C9_10-H9C_10 | 109.5    | H6C_11             | 109.5    |
| H9A_10-C9_10-      |          | C4_11-C7_11-H7A_11 | 109.5    |
| H9C_10             | 109.5    | C4_11-C7_11-H7B_11 | 109.5    |
| H9B_10-C9_10-      |          | H7A_11-C7_11-      |          |
| H9C_10             | 109.5    | H7B_11             | 109.5    |
| C1_10-C10_10-      |          | C4_11-C7_11-H7C_11 | 109.5    |
| H10A_10            | 109.5    | H7A_11-C7_11-      |          |
| C1_10-C10_10-      |          | H7C_11             | 109.5    |
| H10B_10            | 109.5    | H7B_11-C7_11-      |          |
| H10A_10-C10_10-    |          | H7C_11             | 109.5    |
| H10B_10            | 109.5    | C3_11-C8_11-H8A_11 | 109.5    |
| C1_10-C10_10-      |          | C3_11-C8_11-H8B_11 | 109.5    |
| H10C_10            | 109.5    | H8A_11-C8_11-      |          |
| H10A_10-C10_10-    |          | H8B_11             | 109.5    |
| H10C_10            | 109.5    | C3_11-C8_11-H8C_11 | 109.5    |
| H10B_10-C10_10-    |          | H8A_11-C8_11-      |          |
| H10C_10            | 109.5    | H8C_11             | 109.5    |
| C2_11-C1_11-C5_11  | 106.7(6) | H8B_11-C8_11-      |          |
| C2_11-C1_11-C10_11 | 125.6(7) | H8C_11             | 109.5    |
| C5_11-C1_11-C10_11 | 127.8(7) | C2_11-C9_11-H9A_11 | 109.5    |

|                    |          |                    |           |
|--------------------|----------|--------------------|-----------|
| C2_11-C9_11-H9B_11 | 109.5    | H6A_12-C6_12-      | 109.5     |
| H9A_11-C9_11-      | 109.5    | H6C_12             |           |
| H9B_11             |          | H6B_12-C6_12-      | 109.5     |
| C2_11-C9_11-H9C_11 | 109.5    | H6C_12             |           |
| H9A_11-C9_11-      | 109.5    | C4_12-C7_12-H7A_12 | 109.5     |
| H9C_11             |          | C4_12-C7_12-H7B_12 | 109.5     |
| H9B_11-C9_11-      | 109.5    | H7A_12-C7_12-      | 109.5     |
| H9C_11             |          | H7B_12             |           |
| C1_11-C10_11-      | 109.5    | C4_12-C7_12-H7C_12 | 109.5     |
| H10A_11            |          | H7A_12-C7_12-      | 109.5     |
| C1_11-C10_11-      | 109.5    | H7C_12             |           |
| H10B_11            |          | H7B_12-C7_12-      | 109.5     |
| H10A_11-C10_11-    | 109.5    | H7C_12             |           |
| H10B_11            |          | C3_12-C8_12-H8A_12 | 109.5     |
| C1_11-C10_11-      | 109.5    | C3_12-C8_12-H8B_12 | 109.5     |
| H10C_11            |          | H8A_12-C8_12-      | 109.5     |
| H10A_11-C10_11-    | 109.5    | H8B_12             |           |
| H10C_11            |          | C3_12-C8_12-H8C_12 | 109.5     |
| H10B_11-C10_11-    | 109.5    | H8A_12-C8_12-      | 109.5     |
| H10C_11            |          | H8C_12             |           |
| C2_12-C1_12-C5_12  | 108.0(6) | H8B_12-C8_12-      | 109.5     |
| C2_12-C1_12-C10_12 | 125.1(7) | H8C_12             |           |
| C5_12-C1_12-C10_12 | 126.9(7) | C2_12-C9_12-H9A_12 | 109.5     |
| C2_12-C1_12-A19    | 71.2(4)  | C2_12-C9_12-H9B_12 | 109.5     |
| C5_12-C1_12-A19    | 70.9(4)  | H9A_12-C9_12-      | 109.5     |
| C10_12-C1_12-A19   | 123.0(5) | H9B_12             |           |
| C1_12-C2_12-C3_12  | 108.6(6) | C2_12-C9_12-H9C_12 | 109.5     |
| C1_12-C2_12-C9_12  | 124.9(8) | H9A_12-C9_12-      | 109.5     |
| C3_12-C2_12-C9_12  | 126.5(8) | H9C_12             |           |
| C1_12-C2_12-A19    | 72.1(4)  | H9B_12-C9_12-      | 109.5     |
| C3_12-C2_12-A19    | 71.5(4)  | H9C_12             |           |
| C9_12-C2_12-A19    | 122.0(5) | C1_12-C10_12-      | 109.5     |
| C2_12-C3_12-C4_12  | 107.8(6) | H10A_12            |           |
| C2_12-C3_12-C8_12  | 126.7(7) | C1_12-C10_12-      | 109.5     |
| C4_12-C3_12-C8_12  | 125.5(7) | H10B_12            |           |
| C2_12-C3_12-A19    | 71.6(4)  | H10A_12-C10_12-    | 109.5     |
| C4_12-C3_12-A19    | 70.6(4)  | H10B_12            |           |
| C8_12-C3_12-A19    | 122.8(5) | C1_12-C10_12-      | 109.5     |
| C3_12-C4_12-C5_12  | 107.4(6) | H10C_12            |           |
| C3_12-C4_12-C7_12  | 126.8(8) | H10A_12-C10_12-    | 109.5     |
| C5_12-C4_12-C7_12  | 125.5(7) | H10C_12            |           |
| C3_12-C4_12-A19    | 72.0(4)  | H10B_12-C10_12-    | 109.5     |
| C5_12-C4_12-A19    | 71.8(4)  | H10C_12            |           |
| C7_12-C4_12-A19    | 126.8(5) | C1_16-O1_16-A14    | 150.0(10) |
| C1_12-C5_12-C4_12  | 108.1(6) | O1_16-C1_16-C2_16  | 112.2(9)  |
| C1_12-C5_12-C6_12  | 127.6(7) | O1_16-C1_16-C4_16  | 109.3(9)  |
| C4_12-C5_12-C6_12  | 124.1(7) | C2_16-C1_16-C4_16  | 109.6(8)  |
| C1_12-C5_12-A19    | 72.3(4)  | O1_16-C1_16-C3_16  | 108.9(9)  |
| C4_12-C5_12-A19    | 70.7(4)  | C2_16-C1_16-C3_16  | 109.8(8)  |
| C6_12-C5_12-A19    | 125.7(6) | C4_16-C1_16-C3_16  | 106.9(8)  |
| C5_12-C6_12-H6A_12 | 109.5    | F3_16-C2_16-F1_16  | 106.9(9)  |
| C5_12-C6_12-H6B_12 | 109.5    | F3_16-C2_16-F2_16  | 107.6(9)  |
| H6A_12-C6_12-      | 109.5    | F1_16-C2_16-F2_16  | 109.6(10) |
| H6B_12             |          | F3_16-C2_16-C1_16  | 111.2(8)  |
| C5_12-C6_12-H6C_12 | 109.5    | F1_16-C2_16-C1_16  | 109.6(9)  |

|                   |           |                   |           |
|-------------------|-----------|-------------------|-----------|
| F2_16-C2_16-C1_16 | 111.7(8)  | F4_18-C3_18-C1_18 | 107.6(9)  |
| F4_16-C3_16-F6_16 | 107.9(9)  | F6_18-C3_18-C1_18 | 108.9(11) |
| F4_16-C3_16-F5_16 | 107.6(10) | F7_18-C4_18-F8_18 | 109.0(10) |
| F6_16-C3_16-F5_16 | 111.2(10) | F7_18-C4_18-F9_18 | 105.6(11) |
| F4_16-C3_16-C1_16 | 110.0(9)  | F8_18-C4_18-F9_18 | 104.2(10) |
| F6_16-C3_16-C1_16 | 110.6(9)  | F7_18-C4_18-C1_18 | 112.2(9)  |
| F5_16-C3_16-C1_16 | 109.5(9)  | F8_18-C4_18-C1_18 | 113.7(10) |
| F9_16-C4_16-F8_16 | 111.0(10) | F9_18-C4_18-C1_18 | 111.6(9)  |
| F9_16-C4_16-F7_16 | 107.9(10) | C1_19-O1_19-AI14  | 150.5(14) |
| F8_16-C4_16-F7_16 | 107.0(9)  | O1_19-C1_19-C2_19 | 109.6(11) |
| F9_16-C4_16-C1_16 | 110.6(9)  | O1_19-C1_19-C3_19 | 110.4(10) |
| F8_16-C4_16-C1_16 | 110.7(9)  | C2_19-C1_19-C3_19 | 110.2(9)  |
| F7_16-C4_16-C1_16 | 109.5(9)  | O1_19-C1_19-C4_19 | 105.8(11) |
| C1_17-O1_17-AI14  | 151.8(6)  | C2_19-C1_19-C4_19 | 110.6(9)  |
| O1_17-C1_17-C4_17 | 110.4(7)  | C3_19-C1_19-C4_19 | 110.1(9)  |
| O1_17-C1_17-C2_17 | 109.6(7)  | F2_19-C2_19-F1_19 | 100.6(11) |
| C4_17-C1_17-C2_17 | 111.7(7)  | F2_19-C2_19-F3_19 | 109.6(12) |
| O1_17-C1_17-C3_17 | 110.2(7)  | F1_19-C2_19-F3_19 | 110.7(12) |
| C4_17-C1_17-C3_17 | 107.2(7)  | F2_19-C2_19-C1_19 | 115.6(11) |
| C2_17-C1_17-C3_17 | 107.7(7)  | F1_19-C2_19-C1_19 | 110.4(10) |
| F3_17-C2_17-F2_17 | 108.8(8)  | F3_19-C2_19-C1_19 | 109.6(10) |
| F3_17-C2_17-F1_17 | 105.9(9)  | F5_19-C3_19-F4_19 | 104.5(12) |
| F2_17-C2_17-F1_17 | 109.3(9)  | F5_19-C3_19-F6_19 | 98.7(11)  |
| F3_17-C2_17-C1_17 | 111.0(8)  | F4_19-C3_19-F6_19 | 112.3(11) |
| F2_17-C2_17-C1_17 | 112.8(8)  | F5_19-C3_19-C1_19 | 108.9(10) |
| F1_17-C2_17-C1_17 | 108.7(8)  | F4_19-C3_19-C1_19 | 113.5(10) |
| F4_17-C3_17-F5_17 | 108.5(9)  | F6_19-C3_19-C1_19 | 117.0(11) |
| F4_17-C3_17-F6_17 | 107.8(9)  | F7_19-C4_19-F8_19 | 106.1(12) |
| F5_17-C3_17-F6_17 | 108.5(8)  | F7_19-C4_19-F9_19 | 112.9(12) |
| F4_17-C3_17-C1_17 | 110.7(8)  | F8_19-C4_19-F9_19 | 107.7(11) |
| F5_17-C3_17-C1_17 | 110.1(8)  | F7_19-C4_19-C1_19 | 108.3(11) |
| F6_17-C3_17-C1_17 | 111.3(8)  | F8_19-C4_19-C1_19 | 110.8(11) |
| F7_17-C4_17-F9_17 | 109.2(10) | F9_19-C4_19-C1_19 | 110.9(10) |
| F7_17-C4_17-F8_17 | 107.7(9)  | C1_20-O1_20-AI12  | 153.8(8)  |
| F9_17-C4_17-F8_17 | 106.9(9)  | O1_20-C1_20-C3_20 | 111.2(8)  |
| F7_17-C4_17-C1_17 | 111.9(9)  | O1_20-C1_20-C4_20 | 111.6(7)  |
| F9_17-C4_17-C1_17 | 108.8(8)  | C3_20-C1_20-C4_20 | 108.4(7)  |
| F8_17-C4_17-C1_17 | 112.2(8)  | O1_20-C1_20-C2_20 | 106.0(7)  |
| C1_18-O1_18-AI14  | 144.8(8)  | C3_20-C1_20-C2_20 | 109.9(7)  |
| O1_18-C1_18-C4_18 | 114.0(10) | C4_20-C1_20-C2_20 | 109.7(7)  |
| O1_18-C1_18-C2_18 | 112.9(9)  | F3_20-C2_20-F1_20 | 111.1(9)  |
| C4_18-C1_18-C2_18 | 109.5(8)  | F3_20-C2_20-F2_20 | 103.7(8)  |
| O1_18-C1_18-C3_18 | 106.4(8)  | F1_20-C2_20-F2_20 | 109.6(8)  |
| C4_18-C1_18-C3_18 | 107.9(8)  | F3_20-C2_20-C1_20 | 109.7(8)  |
| C2_18-C1_18-C3_18 | 105.7(8)  | F1_20-C2_20-C1_20 | 110.7(7)  |
| F1_18-C2_18-F2_18 | 109.6(10) | F2_20-C2_20-C1_20 | 111.9(8)  |
| F1_18-C2_18-F3_18 | 103.8(10) | F6_20-C3_20-F5_20 | 103.9(9)  |
| F2_18-C2_18-F3_18 | 109.8(10) | F6_20-C3_20-F4_20 | 113.0(10) |
| F1_18-C2_18-C1_18 | 111.2(9)  | F5_20-C3_20-F4_20 | 107.8(9)  |
| F2_18-C2_18-C1_18 | 111.9(10) | F6_20-C3_20-C1_20 | 112.0(9)  |
| F3_18-C2_18-C1_18 | 110.1(9)  | F5_20-C3_20-C1_20 | 112.0(8)  |
| F5_18-C3_18-F4_18 | 105.9(10) | F4_20-C3_20-C1_20 | 108.1(8)  |
| F5_18-C3_18-F6_18 | 109.5(11) | F9_20-C4_20-F8_20 | 108.9(9)  |
| F4_18-C3_18-F6_18 | 115.9(12) | F9_20-C4_20-F7_20 | 108.1(8)  |
| F5_18-C3_18-C1_18 | 108.8(9)  | F8_20-C4_20-F7_20 | 108.3(8)  |

|                   |           |                   |           |
|-------------------|-----------|-------------------|-----------|
| F9_20-C4_20-C1_20 | 109.6(8)  | O1_23-C1_23-C4_23 | 108.9(11) |
| F8_20-C4_20-C1_20 | 111.1(8)  | C2_23-C1_23-C4_23 | 109.5(9)  |
| F7_20-C4_20-C1_20 | 110.8(8)  | O1_23-C1_23-C3_23 | 109.6(11) |
| C1_21-O1_21-AI12  | 147.8(9)  | C2_23-C1_23-C3_23 | 108.5(8)  |
| O1_21-C1_21-C3_21 | 112.5(9)  | C4_23-C1_23-C3_23 | 109.0(8)  |
| O1_21-C1_21-C4_21 | 108.5(9)  | F3_23-C2_23-F2_23 | 107.5(13) |
| C3_21-C1_21-C4_21 | 108.9(9)  | F3_23-C2_23-F1_23 | 106.5(12) |
| O1_21-C1_21-C2_21 | 109.8(9)  | F2_23-C2_23-F1_23 | 106.3(11) |
| C3_21-C1_21-C2_21 | 107.2(9)  | F3_23-C2_23-C1_23 | 110.9(12) |
| C4_21-C1_21-C2_21 | 109.9(9)  | F2_23-C2_23-C1_23 | 113.6(12) |
| F1_21-C2_21-F2_21 | 110.3(11) | F1_23-C2_23-C1_23 | 111.7(10) |
| F1_21-C2_21-F3_21 | 105.8(12) | F6_23-C3_23-F5_23 | 108.0(10) |
| F2_21-C2_21-F3_21 | 109.4(12) | F6_23-C3_23-F4_23 | 110.3(10) |
| F1_21-C2_21-C1_21 | 110.4(10) | F5_23-C3_23-F4_23 | 103.7(10) |
| F2_21-C2_21-C1_21 | 111.7(11) | F6_23-C3_23-C1_23 | 113.1(9)  |
| F3_21-C2_21-C1_21 | 109.1(10) | F5_23-C3_23-C1_23 | 111.8(9)  |
| F4_21-C3_21-F5_21 | 104.6(11) | F4_23-C3_23-C1_23 | 109.6(9)  |
| F4_21-C3_21-F6_21 | 108.0(10) | F9_23-C4_23-F7_23 | 103.7(11) |
| F5_21-C3_21-F6_21 | 107.6(10) | F9_23-C4_23-F8_23 | 108.9(10) |
| F4_21-C3_21-C1_21 | 111.0(9)  | F7_23-C4_23-F8_23 | 110.4(12) |
| F5_21-C3_21-C1_21 | 112.3(9)  | F9_23-C4_23-C1_23 | 111.2(9)  |
| F6_21-C3_21-C1_21 | 113.0(10) | F7_23-C4_23-C1_23 | 110.7(10) |
| F9_21-C4_21-F7_21 | 107.0(12) | F8_23-C4_23-C1_23 | 111.7(9)  |
| F9_21-C4_21-F8_21 | 106.9(10) | C1_24-O1_24-AI11  | 150.1(6)  |
| F7_21-C4_21-F8_21 | 107.5(12) | O1_24-C1_24-C3_24 | 104.6(6)  |
| F9_21-C4_21-C1_21 | 110.6(9)  | O1_24-C1_24-C4_24 | 110.1(6)  |
| F7_21-C4_21-C1_21 | 113.0(12) | C3_24-C1_24-C4_24 | 111.0(6)  |
| F8_21-C4_21-C1_21 | 111.6(10) | O1_24-C1_24-C2_24 | 114.8(7)  |
| C1_22-O1_22-AI12  | 151.8(12) | C3_24-C1_24-C2_24 | 109.1(6)  |
| O1_22-C1_22-C3_22 | 113.0(11) | C4_24-C1_24-C2_24 | 107.3(6)  |
| O1_22-C1_22-C2_22 | 108.9(10) | F1_24-C2_24-F3_24 | 107.9(7)  |
| C3_22-C1_22-C2_22 | 107.8(10) | F1_24-C2_24-F2_24 | 107.7(6)  |
| O1_22-C1_22-C4_22 | 106.4(10) | F3_24-C2_24-F2_24 | 107.3(7)  |
| C3_22-C1_22-C4_22 | 111.3(10) | F1_24-C2_24-C1_24 | 111.9(6)  |
| C2_22-C1_22-C4_22 | 109.5(10) | F3_24-C2_24-C1_24 | 109.2(7)  |
| F2_22-C2_22-F1_22 | 108.7(11) | F2_24-C2_24-C1_24 | 112.6(6)  |
| F2_22-C2_22-F3_22 | 109.4(11) | F6_24-C3_24-F4_24 | 102.8(7)  |
| F1_22-C2_22-F3_22 | 104.1(11) | F6_24-C3_24-F5_24 | 108.6(7)  |
| F2_22-C2_22-C1_22 | 111.6(10) | F4_24-C3_24-F5_24 | 109.3(7)  |
| F1_22-C2_22-C1_22 | 109.1(10) | F6_24-C3_24-C1_24 | 113.1(7)  |
| F3_22-C2_22-C1_22 | 113.7(10) | F4_24-C3_24-C1_24 | 114.4(7)  |
| F4_22-C3_22-F6_22 | 104.3(14) | F5_24-C3_24-C1_24 | 108.5(7)  |
| F4_22-C3_22-F5_22 | 105.5(15) | F9_24-C4_24-F8_24 | 108.8(7)  |
| F6_22-C3_22-F5_22 | 108.6(13) | F9_24-C4_24-F7_24 | 108.9(7)  |
| F4_22-C3_22-C1_22 | 114.9(13) | F8_24-C4_24-F7_24 | 105.2(7)  |
| F6_22-C3_22-C1_22 | 113.4(14) | F9_24-C4_24-C1_24 | 112.6(7)  |
| F5_22-C3_22-C1_22 | 109.7(11) | F8_24-C4_24-C1_24 | 112.1(6)  |
| F8_22-C4_22-F9_22 | 108.8(13) | F7_24-C4_24-C1_24 | 108.9(7)  |
| F8_22-C4_22-F7_22 | 109.2(13) | C1_25-O1_25-AI11  | 146.7(4)  |
| F9_22-C4_22-F7_22 | 105.7(14) | O1_25-C1_25-C4_25 | 106.8(5)  |
| F8_22-C4_22-C1_22 | 112.5(12) | O1_25-C1_25-C2_25 | 109.6(5)  |
| F9_22-C4_22-C1_22 | 112.6(12) | C4_25-C1_25-C2_25 | 110.0(5)  |
| F7_22-C4_22-C1_22 | 107.7(12) | O1_25-C1_25-C3_25 | 112.1(5)  |
| C1_23-O1_23-AI12  | 148.6(17) | C4_25-C1_25-C3_25 | 109.9(6)  |
| O1_23-C1_23-C2_23 | 111.3(12) | C2_25-C1_25-C3_25 | 108.4(6)  |

|                   |           |                   |           |
|-------------------|-----------|-------------------|-----------|
| F3_25-C2_25-F1_25 | 107.4(7)  | F1_27-C2_27-C1_27 | 111.9(8)  |
| F3_25-C2_25-F2_25 | 108.0(6)  | F4_27-C3_27-F6_27 | 109.5(9)  |
| F1_25-C2_25-F2_25 | 106.6(6)  | F4_27-C3_27-F5_27 | 106.7(10) |
| F3_25-C2_25-C1_25 | 112.4(5)  | F6_27-C3_27-F5_27 | 107.2(9)  |
| F1_25-C2_25-C1_25 | 110.9(6)  | F4_27-C3_27-C1_27 | 112.3(8)  |
| F2_25-C2_25-C1_25 | 111.4(6)  | F6_27-C3_27-C1_27 | 110.7(9)  |
| F4_25-C3_25-F6_25 | 109.8(7)  | F5_27-C3_27-C1_27 | 110.2(8)  |
| F4_25-C3_25-F5_25 | 105.8(6)  | F9_27-C4_27-F8_27 | 107.6(10) |
| F6_25-C3_25-F5_25 | 106.8(6)  | F9_27-C4_27-F7_27 | 108.6(9)  |
| F4_25-C3_25-C1_25 | 109.6(6)  | F8_27-C4_27-F7_27 | 107.4(10) |
| F6_25-C3_25-C1_25 | 113.3(6)  | F9_27-C4_27-C1_27 | 110.7(8)  |
| F5_25-C3_25-C1_25 | 111.2(6)  | F8_27-C4_27-C1_27 | 111.9(9)  |
| F9_25-C4_25-F7_25 | 109.0(7)  | F7_27-C4_27-C1_27 | 110.5(8)  |
| F9_25-C4_25-F8_25 | 108.3(6)  | C1_28-O1_28-AI10  | 152.4(9)  |
| F7_25-C4_25-F8_25 | 105.4(7)  | O1_28-C1_28-C4_28 | 109.1(8)  |
| F9_25-C4_25-C1_25 | 112.2(6)  | O1_28-C1_28-C3_28 | 109.5(9)  |
| F7_25-C4_25-C1_25 | 109.1(6)  | C4_28-C1_28-C3_28 | 109.6(8)  |
| F8_25-C4_25-C1_25 | 112.7(6)  | O1_28-C1_28-C2_28 | 110.2(9)  |
| C1_26-O1_26-AI11  | 145.6(14) | C4_28-C1_28-C2_28 | 108.7(7)  |
| O1_26-C1_26-C4_26 | 114.5(9)  | C3_28-C1_28-C2_28 | 109.8(7)  |
| O1_26-C1_26-C3_26 | 111.3(11) | F1_28-C2_28-F2_28 | 109.4(9)  |
| C4_26-C1_26-C3_26 | 108.1(8)  | F1_28-C2_28-F3_28 | 108.3(9)  |
| O1_26-C1_26-C2_26 | 104.7(10) | F2_28-C2_28-F3_28 | 106.8(9)  |
| C4_26-C1_26-C2_26 | 109.5(8)  | F1_28-C2_28-C1_28 | 111.7(9)  |
| C3_26-C1_26-C2_26 | 108.6(8)  | F2_28-C2_28-C1_28 | 111.4(8)  |
| F3_26-C2_26-F1_26 | 106.8(10) | F3_28-C2_28-C1_28 | 109.1(8)  |
| F3_26-C2_26-F2_26 | 107.7(10) | F4_28-C3_28-F5_28 | 106.8(9)  |
| F1_26-C2_26-F2_26 | 111.3(10) | F4_28-C3_28-F6_28 | 108.8(9)  |
| F3_26-C2_26-C1_26 | 109.6(9)  | F5_28-C3_28-F6_28 | 106.1(9)  |
| F1_26-C2_26-C1_26 | 110.0(9)  | F4_28-C3_28-C1_28 | 111.7(8)  |
| F2_26-C2_26-C1_26 | 111.3(10) | F5_28-C3_28-C1_28 | 110.8(8)  |
| F6_26-C3_26-F5_26 | 109.4(11) | F6_28-C3_28-C1_28 | 112.4(8)  |
| F6_26-C3_26-F4_26 | 105.7(10) | F9_28-C4_28-F7_28 | 108.9(10) |
| F5_26-C3_26-F4_26 | 105.3(10) | F9_28-C4_28-F8_28 | 109.1(10) |
| F6_26-C3_26-C1_26 | 115.2(11) | F7_28-C4_28-F8_28 | 108.3(9)  |
| F5_26-C3_26-C1_26 | 109.7(9)  | F9_28-C4_28-C1_28 | 110.3(8)  |
| F4_26-C3_26-C1_26 | 111.0(9)  | F7_28-C4_28-C1_28 | 109.9(8)  |
| F7_26-C4_26-F9_26 | 106.8(10) | F8_28-C4_28-C1_28 | 110.3(8)  |
| F7_26-C4_26-F8_26 | 107.3(13) | C1_29-O1_29-AI10  | 152.7(8)  |
| F9_26-C4_26-F8_26 | 106.4(12) | O1_29-C1_29-C4_29 | 109.6(8)  |
| F7_26-C4_26-C1_26 | 111.3(9)  | O1_29-C1_29-C2_29 | 109.5(8)  |
| F9_26-C4_26-C1_26 | 112.3(9)  | C4_29-C1_29-C2_29 | 110.5(8)  |
| F8_26-C4_26-C1_26 | 112.3(11) | O1_29-C1_29-C3_29 | 108.6(8)  |
| C1_27-O1_27-AI11  | 146.9(6)  | C4_29-C1_29-C3_29 | 109.7(8)  |
| O1_27-C1_27-C2_27 | 110.5(7)  | C2_29-C1_29-C3_29 | 109.0(7)  |
| O1_27-C1_27-C3_27 | 107.4(7)  | F3_29-C2_29-F2_29 | 107.4(10) |
| C2_27-C1_27-C3_27 | 110.4(7)  | F3_29-C2_29-F1_29 | 107.5(8)  |
| O1_27-C1_27-C4_27 | 109.3(7)  | F2_29-C2_29-F1_29 | 107.9(10) |
| C2_27-C1_27-C4_27 | 110.1(7)  | F3_29-C2_29-C1_29 | 112.2(8)  |
| C3_27-C1_27-C4_27 | 109.1(7)  | F2_29-C2_29-C1_29 | 111.5(9)  |
| F3_27-C2_27-F2_27 | 107.4(10) | F1_29-C2_29-C1_29 | 110.2(8)  |
| F3_27-C2_27-F1_27 | 107.5(9)  | F4_29-C3_29-F5_29 | 106.8(9)  |
| F2_27-C2_27-F1_27 | 106.9(10) | F4_29-C3_29-F6_29 | 108.4(9)  |
| F3_27-C2_27-C1_27 | 110.7(8)  | F5_29-C3_29-F6_29 | 108.4(9)  |
| F2_27-C2_27-C1_27 | 112.2(9)  | F4_29-C3_29-C1_29 | 110.3(8)  |

|                   |           |                   |           |
|-------------------|-----------|-------------------|-----------|
| F5_29-C3_29-C1_29 | 111.3(8)  | F9_31-C4_31-C1_31 | 112.6(9)  |
| F6_29-C3_29-C1_29 | 111.4(8)  | F7_31-C4_31-C1_31 | 112.0(9)  |
| F9_29-C4_29-F8_29 | 108.8(9)  | F8_31-C4_31-C1_31 | 114.9(9)  |
| F9_29-C4_29-F7_29 | 106.1(10) | C1_32-O1_32-Al13  | 147.5(16) |
| F8_29-C4_29-F7_29 | 106.5(10) | O1_32-C1_32-C3_32 | 109.3(11) |
| F9_29-C4_29-C1_29 | 111.4(8)  | O1_32-C1_32-C2_32 | 110.9(11) |
| F8_29-C4_29-C1_29 | 111.9(9)  | C3_32-C1_32-C2_32 | 111.2(9)  |
| F7_29-C4_29-C1_29 | 111.9(9)  | O1_32-C1_32-C4_32 | 110.1(12) |
| C1_30-O1_30-Al10  | 150.5(18) | C3_32-C1_32-C4_32 | 108.3(9)  |
| O1_30-C1_30-C4_30 | 110.6(13) | C2_32-C1_32-C4_32 | 107.0(9)  |
| O1_30-C1_30-C2_30 | 109.1(13) | F3_32-C2_32-F1_32 | 108.3(11) |
| C4_30-C1_30-C2_30 | 108.9(10) | F3_32-C2_32-F2_32 | 106.6(11) |
| O1_30-C1_30-C3_30 | 110.8(13) | F1_32-C2_32-F2_32 | 111.6(11) |
| C4_30-C1_30-C3_30 | 109.5(10) | F3_32-C2_32-C1_32 | 111.1(10) |
| C2_30-C1_30-C3_30 | 107.9(10) | F1_32-C2_32-C1_32 | 108.4(10) |
| F1_30-C2_30-F2_30 | 107.6(14) | F2_32-C2_32-C1_32 | 110.8(10) |
| F1_30-C2_30-F3_30 | 105.5(14) | F6_32-C3_32-F4_32 | 106.9(12) |
| F2_30-C2_30-F3_30 | 109.9(15) | F6_32-C3_32-F5_32 | 106.9(12) |
| F1_30-C2_30-C1_30 | 111.0(11) | F4_32-C3_32-F5_32 | 109.3(11) |
| F2_30-C2_30-C1_30 | 112.8(14) | F6_32-C3_32-C1_32 | 112.9(11) |
| F3_30-C2_30-C1_30 | 109.8(12) | F4_32-C3_32-C1_32 | 110.8(9)  |
| F5_30-C3_30-F4_30 | 107.7(13) | F5_32-C3_32-C1_32 | 110.0(10) |
| F5_30-C3_30-F6_30 | 106.0(13) | F8_32-C4_32-F9_32 | 106.9(11) |
| F4_30-C3_30-F6_30 | 107.7(14) | F8_32-C4_32-F7_32 | 109.8(11) |
| F5_30-C3_30-C1_30 | 113.4(12) | F9_32-C4_32-F7_32 | 106.3(11) |
| F4_30-C3_30-C1_30 | 109.7(11) | F8_32-C4_32-C1_32 | 113.3(11) |
| F6_30-C3_30-C1_30 | 112.0(12) | F9_32-C4_32-C1_32 | 112.0(10) |
| F9_30-C4_30-F8_30 | 107.4(13) | F7_32-C4_32-C1_32 | 108.3(9)  |
| F9_30-C4_30-F7_30 | 107.8(15) | C1_33-O1_33-Al11  | 152.7(17) |
| F8_30-C4_30-F7_30 | 110.0(15) | O1_33-C1_33-C4_33 | 112.5(11) |
| F9_30-C4_30-C1_30 | 111.5(11) | O1_33-C1_33-C2_33 | 106.1(11) |
| F8_30-C4_30-C1_30 | 110.1(12) | C4_33-C1_33-C2_33 | 107.8(9)  |
| F7_30-C4_30-C1_30 | 110.0(13) | O1_33-C1_33-C3_33 | 109.9(12) |
| C1_31-O1_31-Al13  | 148.2(8)  | C4_33-C1_33-C3_33 | 110.4(9)  |
| O1_31-C1_31-C2_31 | 111.1(9)  | C2_33-C1_33-C3_33 | 110.0(9)  |
| O1_31-C1_31-C4_31 | 111.3(8)  | F2_33-C2_33-F3_33 | 108.4(14) |
| C2_31-C1_31-C4_31 | 110.8(8)  | F2_33-C2_33-F1_33 | 109.7(15) |
| O1_31-C1_31-C3_31 | 106.7(9)  | F3_33-C2_33-F1_33 | 106.5(12) |
| C2_31-C1_31-C3_31 | 106.7(8)  | F2_33-C2_33-C1_33 | 112.6(13) |
| C4_31-C1_31-C3_31 | 110.0(8)  | F3_33-C2_33-C1_33 | 106.8(10) |
| F1_31-C2_31-F3_31 | 107.4(10) | F1_33-C2_33-C1_33 | 112.5(10) |
| F1_31-C2_31-F2_31 | 107.9(10) | F5_33-C3_33-F6_33 | 109.3(13) |
| F3_31-C2_31-F2_31 | 103.8(9)  | F5_33-C3_33-F4_33 | 108.2(12) |
| F1_31-C2_31-C1_31 | 113.5(9)  | F6_33-C3_33-F4_33 | 107.2(13) |
| F3_31-C2_31-C1_31 | 112.9(8)  | F5_33-C3_33-C1_33 | 110.9(10) |
| F2_31-C2_31-C1_31 | 110.7(9)  | F6_33-C3_33-C1_33 | 113.6(12) |
| F5_31-C3_31-F6_31 | 105.7(10) | F4_33-C3_33-C1_33 | 107.4(10) |
| F5_31-C3_31-F4_31 | 109.1(11) | C3_33-F5_33-F4_54 | 136.6(18) |
| F6_31-C3_31-F4_31 | 106.3(11) | F7_33-C4_33-F9_33 | 106.5(12) |
| F5_31-C3_31-C1_31 | 113.3(10) | F7_33-C4_33-F8_33 | 107.0(12) |
| F6_31-C3_31-C1_31 | 110.6(10) | F9_33-C4_33-F8_33 | 106.9(12) |
| F4_31-C3_31-C1_31 | 111.4(9)  | F7_33-C4_33-C1_33 | 111.0(11) |
| F9_31-C4_31-F7_31 | 104.7(10) | F9_33-C4_33-C1_33 | 113.0(10) |
| F9_31-C4_31-F8_31 | 105.0(9)  | F8_33-C4_33-C1_33 | 112.0(11) |
| F7_31-C4_31-F8_31 | 106.9(10) | C1_34-O1_34-Al11  | 146.9(12) |



|                   |           |                   |           |
|-------------------|-----------|-------------------|-----------|
| O1_34-C1_34-C4_34 | 111.2(11) | C2_36-C1_36-C4_36 | 108.8(9)  |
| O1_34-C1_34-C3_34 | 110.6(11) | F2_36-C2_36-F1_36 | 105.7(12) |
| C4_34-C1_34-C3_34 | 108.8(10) | F2_36-C2_36-F3_36 | 110.7(11) |
| O1_34-C1_34-C2_34 | 106.0(11) | F1_36-C2_36-F3_36 | 104.7(12) |
| C4_34-C1_34-C2_34 | 109.8(10) | F2_36-C2_36-C1_36 | 113.6(10) |
| C3_34-C1_34-C2_34 | 110.3(10) | F1_36-C2_36-C1_36 | 111.2(11) |
| F2_34-C2_34-F3_34 | 106.9(16) | F3_36-C2_36-C1_36 | 110.5(11) |
| F2_34-C2_34-F1_34 | 109.1(17) | F4_36-C3_36-F6_36 | 108.3(11) |
| F3_34-C2_34-F1_34 | 108.1(15) | F4_36-C3_36-F5_36 | 103.5(14) |
| F2_34-C2_34-C1_34 | 111.0(14) | F6_36-C3_36-F5_36 | 106.3(13) |
| F3_34-C2_34-C1_34 | 111.9(12) | F4_36-C3_36-C1_36 | 115.3(11) |
| F1_34-C2_34-C1_34 | 109.7(12) | F6_36-C3_36-C1_36 | 112.3(11) |
| F5_34-C3_34-F6_34 | 105.7(15) | F5_36-C3_36-C1_36 | 110.4(11) |
| F5_34-C3_34-F4_34 | 105.9(14) | F9_36-C4_36-F7_36 | 105.2(13) |
| F6_34-C3_34-F4_34 | 111.1(16) | F9_36-C4_36-F8_36 | 108.4(15) |
| F5_34-C3_34-C1_34 | 110.6(12) | F7_36-C4_36-F8_36 | 109.5(12) |
| F6_34-C3_34-C1_34 | 111.6(14) | F9_36-C4_36-C1_36 | 110.8(13) |
| F4_34-C3_34-C1_34 | 111.6(12) | F7_36-C4_36-C1_36 | 110.4(10) |
| F8_34-C4_34-F9_34 | 105.6(17) | F8_36-C4_36-C1_36 | 112.3(13) |
| F8_34-C4_34-F7_34 | 108.9(17) | C1_37-O1_37-Al13  | 146.7(11) |
| F9_34-C4_34-F7_34 | 107.7(15) | O1_37-C1_37-C2_37 | 111.2(9)  |
| F8_34-C4_34-C1_34 | 112.0(15) | O1_37-C1_37-C3_37 | 109.9(10) |
| F9_34-C4_34-C1_34 | 112.5(13) | C2_37-C1_37-C3_37 | 110.7(9)  |
| F7_34-C4_34-C1_34 | 110.0(12) | O1_37-C1_37-C4_37 | 104.8(9)  |
| C1_35-O1_35-Al10  | 147.0(10) | C2_37-C1_37-C4_37 | 110.2(9)  |
| O1_35-C1_35-C2_35 | 106.9(10) | C3_37-C1_37-C4_37 | 109.8(9)  |
| O1_35-C1_35-C4_35 | 113.2(10) | F3_37-C2_37-F1_37 | 106.9(11) |
| C2_35-C1_35-C4_35 | 108.5(9)  | F3_37-C2_37-F2_37 | 107.1(11) |
| O1_35-C1_35-C3_35 | 109.9(10) | F1_37-C2_37-F2_37 | 106.5(11) |
| C2_35-C1_35-C3_35 | 109.9(10) | F3_37-C2_37-C1_37 | 112.7(9)  |
| C4_35-C1_35-C3_35 | 108.4(10) | F1_37-C2_37-C1_37 | 110.7(10) |
| F1_35-C2_35-F2_35 | 107.8(13) | F2_37-C2_37-C1_37 | 112.5(10) |
| F1_35-C2_35-F3_35 | 108.5(14) | F5_37-C3_37-F4_37 | 102.5(11) |
| F2_35-C2_35-F3_35 | 107.1(12) | F5_37-C3_37-F6_37 | 109.4(10) |
| F1_35-C2_35-C1_35 | 111.5(13) | F4_37-C3_37-F6_37 | 109.2(10) |
| F2_35-C2_35-C1_35 | 113.0(11) | F5_37-C3_37-C1_37 | 108.8(10) |
| F3_35-C2_35-C1_35 | 108.7(10) | F4_37-C3_37-C1_37 | 117.7(10) |
| F4_35-C3_35-F5_35 | 108.9(15) | F6_37-C3_37-C1_37 | 108.9(9)  |
| F4_35-C3_35-F6_35 | 106.7(11) | F8_37-C4_37-F9_37 | 110.9(12) |
| F5_35-C3_35-F6_35 | 110.1(14) | F8_37-C4_37-F7_37 | 102.9(12) |
| F4_35-C3_35-C1_35 | 110.8(11) | F9_37-C4_37-F7_37 | 108.0(12) |
| F5_35-C3_35-C1_35 | 108.9(12) | F8_37-C4_37-C1_37 | 112.7(10) |
| F6_35-C3_35-C1_35 | 111.5(11) | F9_37-C4_37-C1_37 | 111.1(11) |
| F7_35-C4_35-F9_35 | 106.7(11) | F7_37-C4_37-C1_37 | 110.7(10) |
| F7_35-C4_35-F8_35 | 108.1(11) | C1_38-O1_38-Al13  | 147.0(13) |
| F9_35-C4_35-F8_35 | 107.8(12) | O1_38-C1_38-C2_38 | 113.2(11) |
| F7_35-C4_35-C1_35 | 111.8(10) | O1_38-C1_38-C4_38 | 109.8(11) |
| F9_35-C4_35-C1_35 | 110.3(10) | C2_38-C1_38-C4_38 | 108.4(9)  |
| F8_35-C4_35-C1_35 | 112.0(11) | O1_38-C1_38-C3_38 | 106.6(10) |
| C1_36-O1_36-Al12  | 148(2)    | C2_38-C1_38-C3_38 | 109.0(9)  |
| O1_36-C1_36-C3_36 | 107.0(13) | C4_38-C1_38-C3_38 | 109.8(9)  |
| O1_36-C1_36-C2_36 | 113.0(12) | F2_38-C2_38-F3_38 | 108.6(11) |
| C3_36-C1_36-C2_36 | 109.8(10) | F2_38-C2_38-F1_38 | 105.9(12) |
| O1_36-C1_36-C4_36 | 110.2(13) | F3_38-C2_38-F1_38 | 108.4(11) |
| C3_36-C1_36-C4_36 | 107.9(9)  | F2_38-C2_38-C1_38 | 112.6(11) |

|                   |           |                   |           |
|-------------------|-----------|-------------------|-----------|
| F3_38-C2_38-C1_38 | 109.4(10) | F4_40-C3_40-C1_40 | 111.1(10) |
| F1_38-C2_38-C1_38 | 111.8(12) | F6_40-C3_40-C1_40 | 109.4(9)  |
| F6_38-C3_38-F4_38 | 111.0(12) | F5_40-C3_40-C1_40 | 106.4(9)  |
| F6_38-C3_38-F5_38 | 104.6(12) | F9_40-C4_40-F8_40 | 108.0(10) |
| F4_38-C3_38-F5_38 | 104.5(12) | F9_40-C4_40-F7_40 | 108.5(11) |
| F6_38-C3_38-C1_38 | 111.9(11) | F8_40-C4_40-F7_40 | 109.1(10) |
| F4_38-C3_38-C1_38 | 111.8(10) | F9_40-C4_40-C1_40 | 111.4(9)  |
| F5_38-C3_38-C1_38 | 112.5(11) | F8_40-C4_40-C1_40 | 112.2(9)  |
| F8_38-C4_38-F9_38 | 111.1(12) | F7_40-C4_40-C1_40 | 107.5(9)  |
| F8_38-C4_38-F7_38 | 106.7(13) | F1_41-C1_41-C6_41 | 120.6(8)  |
| F9_38-C4_38-F7_38 | 103.5(12) | F1_41-C1_41-C2_41 | 118.7(8)  |
| F8_38-C4_38-C1_38 | 115.5(11) | C6_41-C1_41-C2_41 | 120.6(8)  |
| F9_38-C4_38-C1_38 | 110.8(10) | F2_41-C2_41-C3_41 | 120.5(8)  |
| F7_38-C4_38-C1_38 | 108.3(11) | F2_41-C2_41-C1_41 | 118.4(8)  |
| C1_39-O1_39-AI13  | 151.6(14) | C3_41-C2_41-C1_41 | 121.1(8)  |
| O1_39-C1_39-C2_39 | 114.9(12) | C2_41-C3_41-C4_41 | 118.3(8)  |
| O1_39-C1_39-C3_39 | 106.2(11) | C2_41-C3_41-H3_41 | 120.8     |
| C2_39-C1_39-C3_39 | 108.6(10) | C4_41-C3_41-H3_41 | 120.8     |
| O1_39-C1_39-C4_39 | 106.6(11) | C5_41-C4_41-C3_41 | 120.9(9)  |
| C2_39-C1_39-C4_39 | 108.4(10) | C5_41-C4_41-H4_41 | 119.6     |
| C3_39-C1_39-C4_39 | 112.2(10) | C3_41-C4_41-H4_41 | 119.6     |
| F3_39-C2_39-F1_39 | 107.0(15) | C4_41-C5_41-C6_41 | 120.2(8)  |
| F3_39-C2_39-F2_39 | 106.6(15) | C4_41-C5_41-H5_41 | 119.9     |
| F1_39-C2_39-F2_39 | 103.9(13) | C6_41-C5_41-H5_41 | 119.9     |
| F3_39-C2_39-C1_39 | 113.8(13) | C1_41-C6_41-C5_41 | 118.8(8)  |
| F1_39-C2_39-C1_39 | 112.5(12) | C1_41-C6_41-H6_41 | 120.6     |
| F2_39-C2_39-C1_39 | 112.3(12) | C5_41-C6_41-H6_41 | 120.6     |
| F4_39-C3_39-F6_39 | 101.7(13) | F1_42-C1_42-C6_42 | 122.3(13) |
| F4_39-C3_39-F5_39 | 108.2(13) | F1_42-C1_42-C2_42 | 117.4(12) |
| F6_39-C3_39-F5_39 | 105.6(13) | C6_42-C1_42-C2_42 | 120.3(12) |
| F4_39-C3_39-C1_39 | 113.8(12) | F2_42-C2_42-C3_42 | 122.3(12) |
| F6_39-C3_39-C1_39 | 111.9(12) | F2_42-C2_42-C1_42 | 119.5(12) |
| F5_39-C3_39-C1_39 | 114.6(12) | C3_42-C2_42-C1_42 | 118.3(11) |
| F8_39-C4_39-F9_39 | 100.7(13) | C2_42-C3_42-C4_42 | 122.1(13) |
| F8_39-C4_39-F7_39 | 110.2(14) | C2_42-C3_42-H3_42 | 118.9     |
| F9_39-C4_39-F7_39 | 104.3(13) | C4_42-C3_42-H3_42 | 118.9     |
| F8_39-C4_39-C1_39 | 116.0(13) | C3_42-C4_42-C5_42 | 119.8(13) |
| F9_39-C4_39-C1_39 | 114.4(12) | C3_42-C4_42-H4_42 | 120.1     |
| F7_39-C4_39-C1_39 | 110.3(12) | C5_42-C4_42-H4_42 | 120.1     |
| C1_40-O1_40-AI10  | 146.5(7)  | C6_42-C5_42-C4_42 | 118.0(13) |
| O1_40-C1_40-C2_40 | 111.8(8)  | C6_42-C5_42-H5_42 | 121.0     |
| O1_40-C1_40-C4_40 | 108.0(8)  | C4_42-C5_42-H5_42 | 121.0     |
| C2_40-C1_40-C4_40 | 111.6(9)  | C5_42-C6_42-C1_42 | 121.5(13) |
| O1_40-C1_40-C3_40 | 111.8(8)  | C5_42-C6_42-H6_42 | 119.3     |
| C2_40-C1_40-C3_40 | 106.3(9)  | C1_42-C6_42-H6_42 | 119.3     |
| C4_40-C1_40-C3_40 | 107.2(8)  | C1_43-O1_43-AI10  | 154.4(16) |
| F3_40-C2_40-F2_40 | 109.9(10) | O1_43-C1_43-C4_43 | 110.7(14) |
| F3_40-C2_40-F1_40 | 103.6(12) | O1_43-C1_43-C3_43 | 107.9(13) |
| F2_40-C2_40-F1_40 | 103.1(12) | C4_43-C1_43-C3_43 | 110.0(10) |
| F3_40-C2_40-C1_40 | 113.4(9)  | O1_43-C1_43-C2_43 | 111.2(13) |
| F2_40-C2_40-C1_40 | 116.1(9)  | C4_43-C1_43-C2_43 | 108.8(10) |
| F1_40-C2_40-C1_40 | 109.5(10) | C3_43-C1_43-C2_43 | 108.2(10) |
| F4_40-C3_40-F6_40 | 110.9(12) | F3_43-C2_43-F1_43 | 104.5(14) |
| F4_40-C3_40-F5_40 | 107.1(12) | F3_43-C2_43-F2_43 | 110.4(14) |
| F6_40-C3_40-F5_40 | 111.8(11) | F1_43-C2_43-F2_43 | 107.5(14) |

|                   |           |                   |           |
|-------------------|-----------|-------------------|-----------|
| F3_43-C2_43-C1_43 | 112.2(12) | F6_45-C3_45-F5_45 | 107.4(13) |
| F1_43-C2_43-C1_43 | 110.8(13) | F4_45-C3_45-C1_45 | 112.9(12) |
| F2_43-C2_43-C1_43 | 111.2(12) | F6_45-C3_45-C1_45 | 112.3(11) |
| F6_43-C3_43-F4_43 | 108.0(14) | F5_45-C3_45-C1_45 | 107.6(11) |
| F6_43-C3_43-F5_43 | 109.2(15) | F9_45-C4_45-F7_45 | 105.6(12) |
| F4_43-C3_43-F5_43 | 109.0(15) | F9_45-C4_45-F8_45 | 109.5(13) |
| F6_43-C3_43-C1_43 | 112.4(12) | F7_45-C4_45-F8_45 | 106.4(11) |
| F4_43-C3_43-C1_43 | 110.1(12) | F9_45-C4_45-C1_45 | 112.9(11) |
| F5_43-C3_43-C1_43 | 108.1(14) | F7_45-C4_45-C1_45 | 111.6(10) |
| F9_43-C4_43-F8_43 | 107.7(14) | F8_45-C4_45-C1_45 | 110.5(10) |
| F9_43-C4_43-F7_43 | 111.1(16) | C1_46-O1_46-AI10  | 148.2(12) |
| F8_43-C4_43-F7_43 | 103.8(14) | O1_46-C1_46-C4_46 | 108.5(11) |
| F9_43-C4_43-C1_43 | 110.0(12) | O1_46-C1_46-C3_46 | 109.1(11) |
| F8_43-C4_43-C1_43 | 113.4(13) | C4_46-C1_46-C3_46 | 110.5(10) |
| F7_43-C4_43-C1_43 | 110.7(13) | O1_46-C1_46-C2_46 | 110.8(11) |
| C1_44-O1_44-AI13  | 157.6(19) | C4_46-C1_46-C2_46 | 108.8(10) |
| O1_44-C1_44-C2_44 | 112.3(14) | C3_46-C1_46-C2_46 | 109.1(11) |
| O1_44-C1_44-C4_44 | 110.1(13) | F1_46-C2_46-F3_46 | 108.4(14) |
| C2_44-C1_44-C4_44 | 114.1(11) | F1_46-C2_46-F2_46 | 106.8(14) |
| O1_44-C1_44-C3_44 | 110.3(13) | F3_46-C2_46-F2_46 | 108.4(14) |
| C2_44-C1_44-C3_44 | 104.3(10) | F1_46-C2_46-C1_46 | 111.6(12) |
| C4_44-C1_44-C3_44 | 105.4(10) | F3_46-C2_46-C1_46 | 110.3(11) |
| F1_44-C2_44-F3_44 | 103.6(14) | F2_46-C2_46-C1_46 | 111.1(13) |
| F1_44-C2_44-F2_44 | 115.3(14) | F6_46-C3_46-F5_46 | 111.2(16) |
| F3_44-C2_44-F2_44 | 108.8(12) | F6_46-C3_46-F4_46 | 105.9(15) |
| F1_44-C2_44-C1_44 | 108.8(13) | F5_46-C3_46-F4_46 | 110.5(16) |
| F3_44-C2_44-C1_44 | 109.8(12) | F6_46-C3_46-C1_46 | 111.4(13) |
| F2_44-C2_44-C1_44 | 110.3(11) | F5_46-C3_46-C1_46 | 107.8(13) |
| F6_44-C3_44-F5_44 | 107.6(16) | F4_46-C3_46-C1_46 | 110.0(13) |
| F6_44-C3_44-F4_44 | 109.7(15) | F9_46-C4_46-F8_46 | 108.7(14) |
| F5_44-C3_44-F4_44 | 108.9(15) | F9_46-C4_46-F7_46 | 110.1(15) |
| F6_44-C3_44-C1_44 | 113.5(13) | F8_46-C4_46-F7_46 | 106.0(13) |
| F5_44-C3_44-C1_44 | 108.3(14) | F9_46-C4_46-C1_46 | 108.3(12) |
| F4_44-C3_44-C1_44 | 108.8(12) | F8_46-C4_46-C1_46 | 112.5(13) |
| F9_44-C4_44-F8_44 | 109.5(13) | F7_46-C4_46-C1_46 | 111.2(12) |
| F9_44-C4_44-F7_44 | 102.3(14) | C1_47-O1_47-AI14  | 157.6(15) |
| F8_44-C4_44-F7_44 | 108.1(14) | O1_47-C1_47-C4_47 | 112.9(12) |
| F9_44-C4_44-C1_44 | 116.0(12) | O1_47-C1_47-C3_47 | 110.8(13) |
| F8_44-C4_44-C1_44 | 111.7(11) | C4_47-C1_47-C3_47 | 108.7(10) |
| F7_44-C4_44-C1_44 | 108.7(13) | O1_47-C1_47-C2_47 | 106.7(12) |
| C1_45-O1_45-AI10  | 149.7(10) | C4_47-C1_47-C2_47 | 108.3(10) |
| O1_45-C1_45-C2_45 | 112.3(9)  | C3_47-C1_47-C2_47 | 109.5(11) |
| O1_45-C1_45-C3_45 | 109.2(10) | F2_47-C2_47-F1_47 | 106.5(14) |
| C2_45-C1_45-C3_45 | 110.1(10) | F2_47-C2_47-F3_47 | 107.0(14) |
| O1_45-C1_45-C4_45 | 108.2(10) | F1_47-C2_47-F3_47 | 104.6(13) |
| C2_45-C1_45-C4_45 | 110.5(9)  | F2_47-C2_47-C1_47 | 111.5(12) |
| C3_45-C1_45-C4_45 | 106.4(9)  | F1_47-C2_47-C1_47 | 116.5(13) |
| F2_45-C2_45-F1_45 | 101.8(14) | F3_47-C2_47-C1_47 | 110.2(12) |
| F2_45-C2_45-F3_45 | 112.6(12) | F4_47-C3_47-F6_47 | 104.5(14) |
| F1_45-C2_45-F3_45 | 102.1(14) | F4_47-C3_47-F5_47 | 109.0(15) |
| F2_45-C2_45-C1_45 | 115.4(11) | F6_47-C3_47-F5_47 | 105.6(13) |
| F1_45-C2_45-C1_45 | 114.3(12) | F4_47-C3_47-C1_47 | 112.4(13) |
| F3_45-C2_45-C1_45 | 109.7(10) | F6_47-C3_47-C1_47 | 114.7(13) |
| F4_45-C3_45-F6_45 | 108.8(14) | F5_47-C3_47-C1_47 | 110.2(12) |
| F4_45-C3_45-F5_45 | 107.6(14) | F8_47-C4_47-F7_47 | 103.1(13) |

|                   |           |                      |            |
|-------------------|-----------|----------------------|------------|
| F8_47-C4_47-F9_47 | 105.8(14) | C1_50-O1_50-AI13     | 154(2)     |
| F7_47-C4_47-F9_47 | 115.1(14) | O1_50-C1_50-C3_50    | 111.2(16)  |
| F8_47-C4_47-C1_47 | 111.4(12) | O1_50-C1_50-C4_50    | 110.2(15)  |
| F7_47-C4_47-C1_47 | 114.1(12) | C3_50-C1_50-C4_50    | 109.2(11)  |
| F9_47-C4_47-C1_47 | 107.0(11) | O1_50-C1_50-C2_50    | 108.3(15)  |
| C1_48-O1_48-AI14  | 166.7(14) | C3_50-C1_50-C2_50    | 110.3(11)  |
| O1_48-C1_48-C2_48 | 112.9(11) | C4_50-C1_50-C2_50    | 107.5(11)  |
| O1_48-C1_48-C3_48 | 110.8(12) | F2_50-C2_50-F3_50    | 107.6(15)  |
| C2_48-C1_48-C3_48 | 110.1(10) | F2_50-C2_50-F1_50    | 106.5(15)  |
| O1_48-C1_48-C4_48 | 105.3(12) | F3_50-C2_50-F1_50    | 113.7(15)  |
| C2_48-C1_48-C4_48 | 109.4(10) | F2_50-C2_50-C1_50    | 112.5(13)  |
| C3_48-C1_48-C4_48 | 108.1(9)  | F3_50-C2_50-C1_50    | 109.5(12)  |
| F3_48-C2_48-F1_48 | 110.3(13) | F1_50-C2_50-C1_50    | 107.2(13)  |
| F3_48-C2_48-F2_48 | 102.3(14) | F6_50-C3_50-F4_50    | 113.4(15)  |
| F1_48-C2_48-F2_48 | 102.1(14) | F6_50-C3_50-F5_50    | 106.6(15)  |
| F3_48-C2_48-C1_48 | 116.2(12) | F4_50-C3_50-F5_50    | 110.8(15)  |
| F1_48-C2_48-C1_48 | 108.5(11) | F6_50-C3_50-C1_50    | 109.8(13)  |
| F2_48-C2_48-C1_48 | 116.5(14) | F4_50-C3_50-C1_50    | 110.4(12)  |
| F4_48-C3_48-F6_48 | 106.6(12) | F5_50-C3_50-C1_50    | 105.6(13)  |
| F4_48-C3_48-F5_48 | 103.8(11) | F8_50-C4_50-F9_50    | 109.1(15)  |
| F6_48-C3_48-F5_48 | 108.0(12) | F8_50-C4_50-F7_50    | 104.4(15)  |
| F4_48-C3_48-C1_48 | 114.0(10) | F9_50-C4_50-F7_50    | 116.4(16)  |
| F6_48-C3_48-C1_48 | 112.9(11) | F8_50-C4_50-C1_50    | 113.7(14)  |
| F5_48-C3_48-C1_48 | 111.1(11) | F9_50-C4_50-C1_50    | 107.1(12)  |
| F8_48-C4_48-F9_48 | 107.5(12) | F7_50-C4_50-C1_50    | 106.4(13)  |
| F8_48-C4_48-F7_48 | 117.1(13) | AI3_52-TI1_52-AI2_52 | 65.93(9)   |
| F9_48-C4_48-F7_48 | 105.6(12) | AI3_52-TI1_52-AI1_52 | 68.03(9)   |
| F8_48-C4_48-C1_48 | 111.3(12) | AI2_52-TI1_52-AI1_52 | 68.61(8)   |
| F9_48-C4_48-C1_48 | 107.9(11) | C5B_52-AI2_52-       |            |
| F7_48-C4_48-C1_48 | 107.0(10) | C1B_52               | 37.6(2)    |
| C1_49-O1_49-AI13  | 164.7(17) | C5B_52-AI2_52-       |            |
| O1_49-C1_49-C3_49 | 108.5(13) | C4B_52               | 37.6(2)    |
| O1_49-C1_49-C2_49 | 108.7(13) | C1B_52-AI2_52-       |            |
| C3_49-C1_49-C2_49 | 108.7(11) | C4B_52               | 62.6(2)    |
| O1_49-C1_49-C4_49 | 108.4(12) | C5B_52-AI2_52-       |            |
| C3_49-C1_49-C4_49 | 109.0(11) | C2B_52               | 62.5(2)    |
| C2_49-C1_49-C4_49 | 113.4(11) | C1B_52-AI2_52-       |            |
| F1_49-C2_49-F2_49 | 115.2(18) | C2B_52               | 37.2(2)    |
| F1_49-C2_49-F3_49 | 106.3(16) | C4B_52-AI2_52-       |            |
| F2_49-C2_49-F3_49 | 103.4(13) | C2B_52               | 62.2(2)    |
| F1_49-C2_49-C1_49 | 104.6(13) | C5B_52-AI2_52-       |            |
| F2_49-C2_49-C1_49 | 110.4(13) | C3B_52               | 62.3(2)    |
| F3_49-C2_49-C1_49 | 117.3(13) | C1B_52-AI2_52-       |            |
| F6_49-C3_49-F4_49 | 101.0(15) | C3B_52               | 62.1(2)    |
| F6_49-C3_49-F5_49 | 111.9(17) | C4B_52-AI2_52-       |            |
| F4_49-C3_49-F5_49 | 110.5(16) | C3B_52               | 37.0(2)    |
| F6_49-C3_49-C1_49 | 109.8(14) | C2B_52-AI2_52-       |            |
| F4_49-C3_49-C1_49 | 115.8(14) | C3B_52               | 37.1(2)    |
| F5_49-C3_49-C1_49 | 107.9(13) | C5B_52-AI2_52-       |            |
| F7_49-C4_49-F8_49 | 108.8(15) | TI1_52               | 147.77(18) |
| F7_49-C4_49-F9_49 | 112.8(16) | C1B_52-AI2_52-       |            |
| F8_49-C4_49-F9_49 | 100.6(15) | TI1_52               | 121.68(17) |
| F7_49-C4_49-C1_49 | 104.2(11) | C4B_52-AI2_52-       |            |
| F8_49-C4_49-C1_49 | 115.5(14) | TI1_52               | 174.58(18) |
| F9_49-C4_49-C1_49 | 115.2(13) |                      |            |

|                      |            |                      |            |
|----------------------|------------|----------------------|------------|
| C2B_52-AI2_52-TI1_52 | 118.75(18) | C1A_52-AI1_52-TI1_52 | 172.52(18) |
| C3B_52-AI2_52-TI1_52 | 140.43(18) | C2A_52-AI1_52-TI1_52 | 148.46(19) |
| C5C_52-AI3_52-C4C_52 | 37.0(2)    | C3A_52-AI1_52-TI1_52 | 120.1(2)   |
| C5C_52-AI3_52-C2C_52 | 62.0(2)    | C5A_52-AI1_52-TI1_52 | 136.28(18) |
| C4C_52-AI3_52-C2C_52 | 61.4(2)    | C4A_52-AI1_52-TI1_52 | 114.83(19) |
| C5C_52-AI3_52-C1C_52 | 37.3(2)    | C5A_52-C1A_52-C2A_52 | 107.7(5)   |
| C4C_52-AI3_52-C1C_52 | 62.0(2)    | C5A_52-C1A_52-C6A_52 | 126.8(6)   |
| C2C_52-AI3_52-C1C_52 | 37.4(2)    | C2A_52-C1A_52-C6A_52 | 125.3(6)   |
| C5C_52-AI3_52-C3C_52 | 61.7(2)    | C5A_52-C1A_52-AI1_52 | 72.2(3)    |
| C4C_52-AI3_52-C3C_52 | 36.8(2)    | C2A_52-C1A_52-AI1_52 | 71.6(4)    |
| C2C_52-AI3_52-C3C_52 | 36.6(2)    | C6A_52-C1A_52-AI1_52 | 125.3(5)   |
| C1C_52-AI3_52-C3C_52 | 61.9(2)    | C3A_52-C2A_52-C1A_52 | 107.9(5)   |
| C5C_52-AI3_52-TI1_52 | 160.4(2)   | C3A_52-C2A_52-C7A_52 | 126.1(6)   |
| C4C_52-AI3_52-TI1_52 | 160.2(2)   | C1A_52-C2A_52-C7A_52 | 125.9(6)   |
| C2C_52-AI3_52-TI1_52 | 113.1(2)   | C3A_52-C2A_52-AI1_52 | 72.0(4)    |
| C1C_52-AI3_52-TI1_52 | 126.7(2)   | C1A_52-C2A_52-AI1_52 | 71.3(3)    |
| C3C_52-AI3_52-TI1_52 | 127.1(2)   | C7A_52-C2A_52-AI1_52 | 125.9(5)   |
| C1A_52-AI1_52-C2A_52 | 37.1(2)    | C2A_52-C3A_52-C4A_52 | 108.6(5)   |
| C1A_52-AI1_52-C3A_52 | 61.5(2)    | C2A_52-C3A_52-C8A_52 | 124.9(7)   |
| C2A_52-AI1_52-C3A_52 | 36.7(2)    | C4A_52-C3A_52-C8A_52 | 126.5(7)   |
| C1A_52-AI1_52-C5A_52 | 36.9(2)    | C2A_52-C3A_52-AI1_52 | 71.3(4)    |
| C2A_52-AI1_52-C5A_52 | 61.5(2)    | C4A_52-C3A_52-AI1_52 | 72.3(4)    |
| C3A_52-AI1_52-C5A_52 | 61.2(2)    | C8A_52-C3A_52-AI1_52 | 124.3(5)   |
| C1A_52-AI1_52-C4A_52 | 61.5(2)    | C3A_52-C4A_52-C5A_52 | 107.5(5)   |
| C2A_52-AI1_52-C4A_52 | 61.4(2)    | C3A_52-C4A_52-C9A_52 | 126.9(6)   |
| C3A_52-AI1_52-C4A_52 | 36.6(2)    | C5A_52-C4A_52-C9A_52 | 125.6(6)   |
| C5A_52-AI1_52-C4A_52 | 36.6(2)    | C3A_52-C4A_52-AI1_52 | 71.0(3)    |

|                             |          |                            |          |
|-----------------------------|----------|----------------------------|----------|
| C5A_52-C4A_52-<br>A11_52    | 71.1(3)  | C2A_52-C7A_52-<br>H7AB_52  | 109.5    |
| C9A_52-C4A_52-<br>A11_52    | 123.8(5) | H7AA_52-C7A_52-<br>H7AB_52 | 109.5    |
| C1A_52-C5A_52-<br>C4A_52    | 108.4(5) | C2A_52-C7A_52-<br>H7AC_52  | 109.5    |
| C1A_52-C5A_52-<br>C10A_52   | 126.8(6) | H7AA_52-C7A_52-<br>H7AC_52 | 109.5    |
| C4A_52-C5A_52-<br>C10A_52   | 124.7(6) | H7AB_52-C7A_52-<br>H7AC_52 | 109.5    |
| C1A_52-C5A_52-<br>A11_52    | 71.0(3)  | C1A_52-C6A_52-<br>H6AA_52  | 109.5    |
| C4A_52-C5A_52-<br>A11_52    | 72.2(3)  | C1A_52-C6A_52-<br>H6AB_52  | 109.5    |
| C10A_52-C5A_52-<br>A11_52   | 125.9(5) | H6AA_52-C6A_52-<br>H6AB_52 | 109.5    |
| C5A_52-C10A_52-<br>H10A_52  | 109.5    | C1A_52-C6A_52-<br>H6AC_52  | 109.5    |
| C5A_52-C10A_52-<br>H10B_52  | 109.5    | H6AA_52-C6A_52-<br>H6AC_52 | 109.5    |
| H10A_52-C10A_52-<br>H10B_52 | 109.5    | H6AB_52-C6A_52-<br>H6AC_52 | 109.5    |
| C5A_52-C10A_52-<br>H10C_52  | 109.5    | C2B_52-C1B_52-<br>C5B_52   | 107.9(5) |
| H10A_52-C10A_52-<br>H10C_52 | 109.5    | C2B_52-C1B_52-<br>C6B_52   | 127.0(6) |
| H10B_52-C10A_52-<br>H10C_52 | 109.5    | C5B_52-C1B_52-<br>C6B_52   | 125.1(6) |
| C4A_52-C9A_52-<br>H9AA_52   | 109.5    | C2B_52-C1B_52-<br>A12_52   | 72.0(3)  |
| C4A_52-C9A_52-<br>H9AB_52   | 109.5    | C5B_52-C1B_52-<br>A12_52   | 70.6(3)  |
| H9AA_52-C9A_52-<br>H9AB_52  | 109.5    | C6B_52-C1B_52-<br>A12_52   | 121.4(4) |
| C4A_52-C9A_52-<br>H9AC_52   | 109.5    | C1B_52-C2B_52-<br>C3B_52   | 107.8(5) |
| H9AA_52-C9A_52-<br>H9AC_52  | 109.5    | C1B_52-C2B_52-<br>C7B_52   | 127.3(5) |
| H9AB_52-C9A_52-<br>H9AC_52  | 109.5    | C3B_52-C2B_52-<br>C7B_52   | 124.8(6) |
| C3A_52-C8A_52-<br>H8AA_52   | 109.5    | C1B_52-C2B_52-<br>A12_52   | 70.8(3)  |
| C3A_52-C8A_52-<br>H8AB_52   | 109.5    | C3B_52-C2B_52-<br>A12_52   | 71.4(3)  |
| H8AA_52-C8A_52-<br>H8AB_52  | 109.5    | C7B_52-C2B_52-<br>A12_52   | 124.0(4) |
| C3A_52-C8A_52-<br>H8AC_52   | 109.5    | C4B_52-C3B_52-<br>C2B_52   | 108.6(5) |
| H8AA_52-C8A_52-<br>H8AC_52  | 109.5    | C4B_52-C3B_52-<br>C8B_52   | 127.0(5) |
| H8AB_52-C8A_52-<br>H8AC_52  | 109.5    | C2B_52-C3B_52-<br>C8B_52   | 124.3(6) |
| C2A_52-C7A_52-<br>H7AA_52   | 109.5    | C4B_52-C3B_52-<br>A12_52   | 70.9(3)  |

|                             |          |                            |          |
|-----------------------------|----------|----------------------------|----------|
| C2B_52-C3B_52-<br>A12_52    | 71.5(3)  | C3B_52-C8B_52-<br>H8BB_52  | 109.5    |
| C8B_52-C3B_52-<br>A12_52    | 127.0(5) | H8BA_52-C8B_52-<br>H8BB_52 | 109.5    |
| C3B_52-C4B_52-<br>C5B_52    | 107.8(5) | C3B_52-C8B_52-<br>H8BC_52  | 109.5    |
| C3B_52-C4B_52-<br>C9B_52    | 127.7(6) | H8BA_52-C8B_52-<br>H8BC_52 | 109.5    |
| C5B_52-C4B_52-<br>C9B_52    | 124.4(6) | H8BB_52-C8B_52-<br>H8BC_52 | 109.5    |
| C3B_52-C4B_52-<br>A12_52    | 72.1(3)  | C2B_52-C7B_52-<br>H7BA_52  | 109.5    |
| C5B_52-C4B_52-<br>A12_52    | 70.6(3)  | C2B_52-C7B_52-<br>H7BB_52  | 109.5    |
| C9B_52-C4B_52-<br>A12_52    | 125.9(4) | H7BA_52-C7B_52-<br>H7BB_52 | 109.5    |
| C1B_52-C5B_52-<br>C4B_52    | 107.9(5) | C2B_52-C7B_52-<br>H7BC_52  | 109.5    |
| C1B_52-C5B_52-<br>C10B_52   | 125.3(6) | H7BA_52-C7B_52-<br>H7BC_52 | 109.5    |
| C4B_52-C5B_52-<br>C10B_52   | 126.8(6) | H7BB_52-C7B_52-<br>H7BC_52 | 109.5    |
| C1B_52-C5B_52-<br>A12_52    | 71.8(3)  | C1B_52-C6B_52-<br>H6BA_52  | 109.5    |
| C4B_52-C5B_52-<br>A12_52    | 71.7(3)  | C1B_52-C6B_52-<br>H6BB_52  | 109.5    |
| C10B_52-C5B_52-<br>A12_52   | 124.7(5) | H6BA_52-C6B_52-<br>H6BB_52 | 109.5    |
| C5B_52-C10B_52-<br>H10D_52  | 109.5    | C1B_52-C6B_52-<br>H6BC_52  | 109.5    |
| C5B_52-C10B_52-<br>H10E_52  | 109.5    | H6BA_52-C6B_52-<br>H6BC_52 | 109.5    |
| H10D_52-C10B_52-<br>H10E_52 | 109.5    | H6BB_52-C6B_52-<br>H6BC_52 | 109.5    |
| C5B_52-C10B_52-<br>H10F_52  | 109.5    | C5C_52-C1C_52-<br>C2C_52   | 106.8(5) |
| H10D_52-C10B_52-<br>H10F_52 | 109.5    | C5C_52-C1C_52-<br>C6C_52   | 126.1(7) |
| H10E_52-C10B_52-<br>H10F_52 | 109.5    | C2C_52-C1C_52-<br>C6C_52   | 127.1(7) |
| C4B_52-C9B_52-<br>H9BA_52   | 109.5    | C5C_52-C1C_52-<br>A13_52   | 70.9(3)  |
| C4B_52-C9B_52-<br>H9BB_52   | 109.5    | C2C_52-C1C_52-<br>A13_52   | 71.2(3)  |
| H9BA_52-C9B_52-<br>H9BB_52  | 109.5    | C6C_52-C1C_52-<br>A13_52   | 122.2(5) |
| C4B_52-C9B_52-<br>H9BC_52   | 109.5    | C3C_52-C2C_52-<br>C1C_52   | 108.6(5) |
| H9BA_52-C9B_52-<br>H9BC_52  | 109.5    | C3C_52-C2C_52-<br>C7C_52   | 125.9(7) |
| H9BB_52-C9B_52-<br>H9BC_52  | 109.5    | C1C_52-C2C_52-<br>C7C_52   | 125.5(7) |
| C3B_52-C8B_52-<br>H8BA_52   | 109.5    | C3C_52-C2C_52-<br>A13_52   | 72.1(3)  |

|                             |          |                            |         |
|-----------------------------|----------|----------------------------|---------|
| C1C_52-C2C_52-<br>A13_52    | 71.4(3)  | C4C_52-C9C_52-<br>H9CB_52  | 109.5   |
| C7C_52-C2C_52-<br>A13_52    | 124.1(5) | H9CA_52-C9C_52-<br>H9CB_52 | 109.5   |
| C2C_52-C3C_52-<br>C4C_52    | 108.0(5) | C4C_52-C9C_52-<br>H9CC_52  | 109.5   |
| C2C_52-C3C_52-<br>C8C_52    | 125.7(7) | H9CA_52-C9C_52-<br>H9CC_52 | 109.5   |
| C4C_52-C3C_52-<br>C8C_52    | 126.2(7) | H9CB_52-C9C_52-<br>H9CC_52 | 109.5   |
| C2C_52-C3C_52-<br>A13_52    | 71.2(3)  | C3C_52-C8C_52-<br>H8CA_52  | 109.5   |
| C4C_52-C3C_52-<br>A13_52    | 71.0(3)  | C3C_52-C8C_52-<br>H8CB_52  | 109.5   |
| C8C_52-C3C_52-<br>A13_52    | 125.1(5) | H8CA_52-C8C_52-<br>H8CB_52 | 109.5   |
| C3C_52-C4C_52-<br>C5C_52    | 108.5(5) | C3C_52-C8C_52-<br>H8CC_52  | 109.5   |
| C3C_52-C4C_52-<br>C9C_52    | 125.9(6) | H8CA_52-C8C_52-<br>H8CC_52 | 109.5   |
| C5C_52-C4C_52-<br>C9C_52    | 125.3(6) | H8CB_52-C8C_52-<br>H8CC_52 | 109.5   |
| C3C_52-C4C_52-<br>A13_52    | 72.2(3)  | C2C_52-C7C_52-<br>H7CA_52  | 109.5   |
| C5C_52-C4C_52-<br>A13_52    | 71.3(3)  | C2C_52-C7C_52-<br>H7CB_52  | 109.5   |
| C9C_52-C4C_52-<br>A13_52    | 127.0(5) | H7CA_52-C7C_52-<br>H7CB_52 | 109.5   |
| C4C_52-C5C_52-<br>C1C_52    | 108.1(5) | C2C_52-C7C_52-<br>H7CC_52  | 109.5   |
| C4C_52-C5C_52-<br>C10C_52   | 124.5(6) | H7CA_52-C7C_52-<br>H7CC_52 | 109.5   |
| C1C_52-C5C_52-<br>C10C_52   | 127.2(6) | H7CB_52-C7C_52-<br>H7CC_52 | 109.5   |
| C4C_52-C5C_52-<br>A13_52    | 71.7(3)  | C1C_52-C6C_52-<br>H6CA_52  | 109.5   |
| C1C_52-C5C_52-<br>A13_52    | 71.7(3)  | C1C_52-C6C_52-<br>H6CB_52  | 109.5   |
| C10C_52-C5C_52-<br>A13_52   | 126.5(5) | H6CA_52-C6C_52-<br>H6CB_52 | 109.5   |
| C5C_52-C10C_52-<br>H10G_52  | 109.5    | C1C_52-C6C_52-<br>H6CC_52  | 109.5   |
| C5C_52-C10C_52-<br>H10H_52  | 109.5    | H6CA_52-C6C_52-<br>H6CC_52 | 109.5   |
| H10G_52-C10C_52-<br>H10H_52 | 109.5    | H6CB_52-C6C_52-<br>H6CC_52 | 109.5   |
| C5C_52-C10C_52-<br>H10I_52  | 109.5    | A13_13-T11_13-A11_13       | 66.8(4) |
| H10G_52-C10C_52-<br>H10I_52 | 109.5    | A13_13-T11_13-A12_13       | 67.3(6) |
| H10H_52-C10C_52-<br>H10I_52 | 109.5    | A11_13-T11_13-A12_13       | 66.9(4) |
| C4C_52-C9C_52-<br>H9CA_52   | 109.5    | C3B_13-A12_13-<br>C2B_13   | 37.1(4) |
|                             |          | C3B_13-A12_13-<br>C4B_13   | 36.8(5) |
|                             |          | C2B_13-A12_13-<br>C4B_13   | 61.1(6) |



|                          |           |                          |           |
|--------------------------|-----------|--------------------------|-----------|
| C3B_13-AI2_13-<br>C1B_13 | 62.5(7)   | C4C_13-AI3_13-<br>TI1_13 | 163.1(10) |
| C2B_13-AI2_13-<br>C1B_13 | 37.8(4)   | C5C_13-AI3_13-<br>TI1_13 | 158.3(11) |
| C4B_13-AI2_13-<br>C1B_13 | 60.9(6)   | C3C_13-AI3_13-<br>TI1_13 | 129.8(9)  |
| C3B_13-AI2_13-<br>C5B_13 | 62.6(6)   | C2C_13-AI3_13-<br>TI1_13 | 114.9(9)  |
| C2B_13-AI2_13-<br>C5B_13 | 62.4(6)   | C1C_13-AI3_13-<br>TI1_13 | 126.6(10) |
| C4B_13-AI2_13-<br>C5B_13 | 36.8(4)   | C4C_13-AI3_13-<br>AI1_13 | 132.9(10) |
| C1B_13-AI2_13-<br>C5B_13 | 36.8(4)   | C5C_13-AI3_13-<br>AI1_13 | 117.9(9)  |
| C3B_13-AI2_13-<br>TI1_13 | 143.5(10) | C3C_13-AI3_13-<br>AI1_13 | 164.2(11) |
| C2B_13-AI2_13-<br>TI1_13 | 117.4(9)  | C2C_13-AI3_13-<br>AI1_13 | 158.6(11) |
| C4B_13-AI2_13-<br>TI1_13 | 177.0(11) | C1C_13-AI3_13-<br>AI1_13 | 128.5(10) |
| C1B_13-AI2_13-<br>TI1_13 | 116.3(10) | TI1_13-AI3_13-AI1_13     | 56.6(3)   |
| C5B_13-AI2_13-<br>TI1_13 | 140.5(11) | C3A_13-AI1_13-<br>C4A_13 | 36.7(4)   |
| C3B_13-AI2_13-<br>AI1_13 | 153.6(10) | C3A_13-AI1_13-<br>C2A_13 | 36.8(4)   |
| C2B_13-AI2_13-<br>AI1_13 | 168.8(10) | C4A_13-AI1_13-<br>C2A_13 | 61.5(6)   |
| C4B_13-AI2_13-<br>AI1_13 | 125.4(9)  | C3A_13-AI1_13-<br>C5A_13 | 61.1(6)   |
| C1B_13-AI2_13-<br>AI1_13 | 134.3(10) | C4A_13-AI1_13-<br>C5A_13 | 36.7(4)   |
| C5B_13-AI2_13-<br>AI1_13 | 116.3(9)  | C2A_13-AI1_13-<br>C5A_13 | 61.2(6)   |
| TI1_13-AI2_13-AI1_13     | 55.7(3)   | C3A_13-AI1_13-<br>C1A_13 | 61.0(6)   |
| C4C_13-AI3_13-<br>C5C_13 | 37.1(4)   | C4A_13-AI1_13-<br>C1A_13 | 61.2(6)   |
| C4C_13-AI3_13-<br>C3C_13 | 36.8(5)   | C2A_13-AI1_13-<br>C1A_13 | 36.5(4)   |
| C5C_13-AI3_13-<br>C3C_13 | 62.0(6)   | C5A_13-AI1_13-<br>C1A_13 | 36.6(4)   |
| C4C_13-AI3_13-<br>C2C_13 | 61.4(7)   | C3A_13-AI1_13-<br>TI1_13 | 127.2(9)  |
| C5C_13-AI3_13-<br>C2C_13 | 61.7(6)   | C4A_13-AI1_13-<br>TI1_13 | 116.0(9)  |
| C3C_13-AI3_13-<br>C2C_13 | 37.0(4)   | C2A_13-AI1_13-<br>TI1_13 | 158.1(9)  |
| C4C_13-AI3_13-<br>C1C_13 | 61.8(6)   | C5A_13-AI1_13-<br>TI1_13 | 131.5(9)  |
| C5C_13-AI3_13-<br>C1C_13 | 37.0(4)   | C1A_13-AI1_13-<br>TI1_13 | 164.4(9)  |
| C3C_13-AI3_13-<br>C1C_13 | 62.2(6)   | C3A_13-AI1_13-<br>AI3_13 | 121.4(9)  |
| C2C_13-AI3_13-<br>C1C_13 | 37.2(4)   | C4A_13-AI1_13-<br>AI3_13 | 151.4(10) |

|                      |           |                         |           |
|----------------------|-----------|-------------------------|-----------|
| C2A_13-AI1_13-AI3_13 | 113.8(9)  | C8A_13-C3A_13-AI1_13    | 123(2)    |
| C5A_13-AI1_13-AI3_13 | 169.4(10) | C3A_13-C4A_13-C5A_13    | 107.8(12) |
| C1A_13-AI1_13-AI3_13 | 133.7(9)  | C3A_13-C4A_13-C9A_13    | 127(2)    |
| TI1_13-AI1_13-AI3_13 | 56.7(3)   | C5A_13-C4A_13-C9A_13    | 126(2)    |
| C3A_13-AI1_13-AI2_13 | 175.3(9)  | C3A_13-C4A_13-AI1_13    | 71.6(7)   |
| C4A_13-AI1_13-AI2_13 | 143.0(10) | C5A_13-C4A_13-AI1_13    | 72.0(7)   |
| C2A_13-AI1_13-AI2_13 | 139.0(10) | C9A_13-C4A_13-AI1_13    | 121(2)    |
| C5A_13-AI1_13-AI2_13 | 116.0(9)  | C4A_13-C5A_13-C1A_13    | 108.0(12) |
| C1A_13-AI1_13-AI2_13 | 114.4(9)  | C4A_13-C5A_13-C10A_13   | 126(2)    |
| TI1_13-AI1_13-AI2_13 | 57.4(3)   | C1A_13-C5A_13-C10A_13   | 126(2)    |
| AI3_13-AI1_13-AI2_13 | 60.7(5)   | C4A_13-C5A_13-AI1_13    | 71.3(7)   |
| C2A_13-C1A_13-C5A_13 | 108.3(12) | C1A_13-C5A_13-AI1_13    | 71.9(7)   |
| C2A_13-C1A_13-C6A_13 | 126.7(19) | C10A_13-C5A_13-AI1_13   | 124(2)    |
| C5A_13-C1A_13-C6A_13 | 124.9(19) | C5A_13-C10A_13-H10A_13  | 109.5     |
| C2A_13-C1A_13-AI1_13 | 71.6(7)   | C5A_13-C10A_13-H10B_13  | 109.5     |
| C5A_13-C1A_13-AI1_13 | 71.5(7)   | H10A_13-C10A_13-H10B_13 | 109.5     |
| C6A_13-C1A_13-AI1_13 | 123(2)    | C5A_13-C10A_13-H10C_13  | 109.5     |
| C1A_13-C2A_13-C3A_13 | 107.4(12) | H10A_13-C10A_13-H10C_13 | 109.5     |
| C1A_13-C2A_13-C7A_13 | 126(2)    | H10B_13-C10A_13-H10C_13 | 109.5     |
| C3A_13-C2A_13-C7A_13 | 126.2(19) | C4A_13-C9A_13-H9AA_13   | 109.5     |
| C1A_13-C2A_13-AI1_13 | 71.9(7)   | C4A_13-C9A_13-H9AB_13   | 109.5     |
| C3A_13-C2A_13-AI1_13 | 71.1(7)   | H9AA_13-C9A_13-H9AB_13  | 109.5     |
| C7A_13-C2A_13-AI1_13 | 121(2)    | C4A_13-C9A_13-H9AC_13   | 109.5     |
| C4A_13-C3A_13-C2A_13 | 108.4(12) | H9AA_13-C9A_13-H9AC_13  | 109.5     |
| C4A_13-C3A_13-C8A_13 | 128(2)    | H9AB_13-C9A_13-H9AC_13  | 109.5     |
| C2A_13-C3A_13-C8A_13 | 123(2)    | C3A_13-C8A_13-H8AA_13   | 109.5     |
| C4A_13-C3A_13-AI1_13 | 71.6(7)   | C3A_13-C8A_13-H8AB_13   | 109.5     |
| C2A_13-C3A_13-AI1_13 | 72.0(7)   |                         |           |

|                            |           |                             |           |
|----------------------------|-----------|-----------------------------|-----------|
| H8AA_13-C8A_13-<br>H8AB_13 | 109.5     | C7B_13-C2B_13-<br>A12_13    | 127(2)    |
| C3A_13-C8A_13-<br>H8AC_13  | 109.5     | C4B_13-C3B_13-<br>C2B_13    | 106.6(12) |
| H8AA_13-C8A_13-<br>H8AC_13 | 109.5     | C4B_13-C3B_13-<br>C8B_13    | 124(2)    |
| H8AB_13-C8A_13-<br>H8AC_13 | 109.5     | C2B_13-C3B_13-<br>C8B_13    | 129(2)    |
| C2A_13-C7A_13-<br>H7AA_13  | 109.5     | C4B_13-C3B_13-<br>A12_13    | 72.8(7)   |
| C2A_13-C7A_13-<br>H7AB_13  | 109.5     | C2B_13-C3B_13-<br>A12_13    | 70.6(7)   |
| H7AA_13-C7A_13-<br>H7AB_13 | 109.5     | C8B_13-C3B_13-<br>A12_13    | 124(2)    |
| C2A_13-C7A_13-<br>H7AC_13  | 109.5     | C3B_13-C4B_13-<br>C5B_13    | 110.1(12) |
| H7AA_13-C7A_13-<br>H7AC_13 | 109.5     | C3B_13-C4B_13-<br>C9B_13    | 126(2)    |
| H7AB_13-C7A_13-<br>H7AC_13 | 109.5     | C5B_13-C4B_13-<br>C9B_13    | 124(2)    |
| C1A_13-C6A_13-<br>H6AA_13  | 109.5     | C3B_13-C4B_13-<br>A12_13    | 70.4(7)   |
| C1A_13-C6A_13-<br>H6AB_13  | 109.5     | C5B_13-C4B_13-<br>A12_13    | 71.2(7)   |
| H6AA_13-C6A_13-<br>H6AB_13 | 109.5     | C9B_13-C4B_13-<br>A12_13    | 120(2)    |
| C1A_13-C6A_13-<br>H6AC_13  | 109.5     | C1B_13-C5B_13-<br>C4B_13    | 106.4(12) |
| H6AA_13-C6A_13-<br>H6AC_13 | 109.5     | C1B_13-C5B_13-<br>C10B_13   | 126(2)    |
| H6AB_13-C6A_13-<br>H6AC_13 | 109.5     | C4B_13-C5B_13-<br>C10B_13   | 127(2)    |
| C5B_13-C1B_13-<br>C2B_13   | 108.5(12) | C1B_13-C5B_13-<br>A12_13    | 70.5(7)   |
| C5B_13-C1B_13-<br>C6B_13   | 130(2)    | C4B_13-C5B_13-<br>A12_13    | 72.0(7)   |
| C2B_13-C1B_13-<br>C6B_13   | 121.4(19) | C10B_13-C5B_13-<br>A12_13   | 120(2)    |
| C5B_13-C1B_13-<br>A12_13   | 72.7(7)   | C5B_13-C10B_13-<br>H10D_13  | 109.5     |
| C2B_13-C1B_13-<br>A12_13   | 70.6(7)   | C5B_13-C10B_13-<br>H10E_13  | 109.5     |
| C6B_13-C1B_13-<br>A12_13   | 123(2)    | H10D_13-C10B_13-<br>H10E_13 | 109.5     |
| C3B_13-C2B_13-<br>C1B_13   | 108.3(12) | C5B_13-C10B_13-<br>H10F_13  | 109.5     |
| C3B_13-C2B_13-<br>C7B_13   | 126.8(19) | H10D_13-C10B_13-<br>H10F_13 | 109.5     |
| C1B_13-C2B_13-<br>C7B_13   | 124.5(19) | H10E_13-C10B_13-<br>H10F_13 | 109.5     |
| C3B_13-C2B_13-<br>A12_13   | 72.2(7)   | C4B_13-C9B_13-<br>H9BA_13   | 109.4     |
| C1B_13-C2B_13-<br>A12_13   | 71.7(7)   | C4B_13-C9B_13-<br>H9BB_13   | 109.5     |

|                            |           |                            |           |
|----------------------------|-----------|----------------------------|-----------|
| H9BA_13-C9B_13-<br>H9BB_13 | 109.5     | C6C_13-C1C_13-<br>A13_13   | 123(2)    |
| C4B_13-C9B_13-<br>H9BC_13  | 109.5     | C3C_13-C2C_13-<br>C1C_13   | 108.8(12) |
| H9BA_13-C9B_13-<br>H9BC_13 | 109.5     | C3C_13-C2C_13-<br>C7C_13   | 124.1(19) |
| H9BB_13-C9B_13-<br>H9BC_13 | 109.5     | C1C_13-C2C_13-<br>C7C_13   | 126.7(19) |
| C3B_13-C8B_13-<br>H8BA_13  | 109.5     | C3C_13-C2C_13-<br>A13_13   | 71.9(7)   |
| C3B_13-C8B_13-<br>H8BB_13  | 109.5     | C1C_13-C2C_13-<br>A13_13   | 71.4(7)   |
| H8BA_13-C8B_13-<br>H8BB_13 | 109.5     | C7C_13-C2C_13-<br>A13_13   | 128(2)    |
| C3B_13-C8B_13-<br>H8BC_13  | 109.5     | C4C_13-C3C_13-<br>C2C_13   | 107.2(12) |
| H8BA_13-C8B_13-<br>H8BC_13 | 109.5     | C4C_13-C3C_13-<br>C8C_13   | 128(2)    |
| H8BB_13-C8B_13-<br>H8BC_13 | 109.5     | C2C_13-C3C_13-<br>C8C_13   | 125(2)    |
| C2B_13-C7B_13-<br>H7BA_13  | 109.5     | C4C_13-C3C_13-<br>A13_13   | 71.5(7)   |
| C2B_13-C7B_13-<br>H7BB_13  | 109.5     | C2C_13-C3C_13-<br>A13_13   | 71.0(7)   |
| H7BA_13-C7B_13-<br>H7BB_13 | 109.5     | C8C_13-C3C_13-<br>A13_13   | 124(2)    |
| C2B_13-C7B_13-<br>H7BC_13  | 109.5     | C3C_13-C4C_13-<br>C5C_13   | 108.7(12) |
| H7BA_13-C7B_13-<br>H7BC_13 | 109.5     | C3C_13-C4C_13-<br>C9C_13   | 124(2)    |
| H7BB_13-C7B_13-<br>H7BC_13 | 109.5     | C5C_13-C4C_13-<br>C9C_13   | 127(2)    |
| C1B_13-C6B_13-<br>H6BA_13  | 109.5     | C3C_13-C4C_13-<br>A13_13   | 71.7(7)   |
| C1B_13-C6B_13-<br>H6BB_13  | 109.5     | C5C_13-C4C_13-<br>A13_13   | 71.1(7)   |
| H6BA_13-C6B_13-<br>H6BB_13 | 109.5     | C9C_13-C4C_13-<br>A13_13   | 125(2)    |
| C1B_13-C6B_13-<br>H6BC_13  | 109.5     | C1C_13-C5C_13-<br>C4C_13   | 107.8(12) |
| H6BA_13-C6B_13-<br>H6BC_13 | 109.5     | C1C_13-C5C_13-<br>C10C_13  | 125.6(19) |
| H6BB_13-C6B_13-<br>H6BC_13 | 109.5     | C4C_13-C5C_13-<br>C10C_13  | 126.6(19) |
| C5C_13-C1C_13-<br>C2C_13   | 107.5(12) | C1C_13-C5C_13-<br>A13_13   | 71.4(7)   |
| C5C_13-C1C_13-<br>C6C_13   | 129(2)    | C4C_13-C5C_13-<br>A13_13   | 71.8(7)   |
| C2C_13-C1C_13-<br>C6C_13   | 123.3(19) | C10C_13-C5C_13-<br>A13_13  | 124(2)    |
| C5C_13-C1C_13-<br>A13_13   | 71.5(7)   | C5C_13-C10C_13-<br>H10G_13 | 109.5     |
| C2C_13-C1C_13-<br>A13_13   | 71.5(7)   | C5C_13-C10C_13-<br>H10H_13 | 109.5     |

|                             |       |                            |           |
|-----------------------------|-------|----------------------------|-----------|
| H10G_13-C10C_13-<br>H10H_13 | 109.5 | H6CB_13-C6C_13-<br>H6CC_13 | 109.5     |
| C5C_13-C10C_13-<br>H10I_13  | 109.5 | AI1_14-TI1_14-AI3_14       | 67.06(13) |
| H10G_13-C10C_13-<br>H10I_13 | 109.5 | AI1_14-TI1_14-AI2_14       | 67.10(14) |
| H10H_13-C10C_13-<br>H10I_13 | 109.5 | AI3_14-TI1_14-AI2_14       | 69.36(9)  |
| C4C_13-C9C_13-<br>H9CA_13   | 109.5 | C5B_14-AI2_14-<br>C4B_14   | 37.3(2)   |
| C4C_13-C9C_13-<br>H9CB_13   | 109.5 | C5B_14-AI2_14-<br>C3B_14   | 61.8(2)   |
| H9CA_13-C9C_13-<br>H9CB_13  | 109.5 | C4B_14-AI2_14-<br>C3B_14   | 36.7(2)   |
| C4C_13-C9C_13-<br>H9CC_13   | 109.5 | C5B_14-AI2_14-<br>C1B_14   | 37.0(2)   |
| H9CA_13-C9C_13-<br>H9CC_13  | 109.5 | C4B_14-AI2_14-<br>C1B_14   | 61.8(3)   |
| H9CB_13-C9C_13-<br>H9CC_13  | 109.5 | C3B_14-AI2_14-<br>C1B_14   | 61.6(2)   |
| C3C_13-C8C_13-<br>H8CA_13   | 109.5 | C5B_14-AI2_14-<br>C2B_14   | 62.0(2)   |
| C3C_13-C8C_13-<br>H8CB_13   | 109.5 | C4B_14-AI2_14-<br>C2B_14   | 61.6(3)   |
| H8CA_13-C8C_13-<br>H8CB_13  | 109.5 | C3B_14-AI2_14-<br>C2B_14   | 36.8(2)   |
| C3C_13-C8C_13-<br>H8CC_13   | 109.5 | C1B_14-AI2_14-<br>C2B_14   | 37.1(2)   |
| H8CA_13-C8C_13-<br>H8CC_13  | 109.5 | C5B_14-AI2_14-<br>TI1_14   | 151.6(2)  |
| H8CB_13-C8C_13-<br>H8CC_13  | 109.5 | C4B_14-AI2_14-<br>TI1_14   | 164.5(2)  |
| C2C_13-C7C_13-<br>H7CA_13   | 109.5 | C3B_14-AI2_14-<br>TI1_14   | 128.2(2)  |
| C2C_13-C7C_13-<br>H7CB_13   | 109.5 | C1B_14-AI2_14-<br>TI1_14   | 118.8(2)  |
| H7CA_13-C7C_13-<br>H7CB_13  | 109.5 | C2B_14-AI2_14-<br>TI1_14   | 108.6(2)  |
| C2C_13-C7C_13-<br>H7CC_13   | 109.5 | C4C_14-AI3_14-<br>C5C_14   | 37.7(2)   |
| H7CA_13-C7C_13-<br>H7CC_13  | 109.5 | C4C_14-AI3_14-<br>C2C_14   | 62.6(2)   |
| H7CB_13-C7C_13-<br>H7CC_13  | 109.5 | C5C_14-AI3_14-<br>C2C_14   | 62.1(2)   |
| C1C_13-C6C_13-<br>H6CA_13   | 109.5 | C4C_14-AI3_14-<br>C1C_14   | 62.9(2)   |
| C1C_13-C6C_13-<br>H6CB_13   | 109.5 | C5C_14-AI3_14-<br>C1C_14   | 37.3(2)   |
| H6CA_13-C6C_13-<br>H6CB_13  | 109.5 | C2C_14-AI3_14-<br>C1C_14   | 37.2(2)   |
| C1C_13-C6C_13-<br>H6CC_13   | 109.5 | C4C_14-AI3_14-<br>C3C_14   | 37.3(2)   |
| H6CA_13-C6C_13-<br>H6CC_13  | 109.5 | C5C_14-AI3_14-<br>C3C_14   | 62.3(2)   |
|                             |       | C2C_14-AI3_14-<br>C3C_14   | 37.5(2)   |
|                             |       | C1C_14-AI3_14-<br>C3C_14   | 62.5(2)   |

|                      |          |                         |          |
|----------------------|----------|-------------------------|----------|
| C4C_14-Al3_14-TI1_14 | 154.5(2) | C3A_14-C2A_14-C7A_14    | 126.0(7) |
| C5C_14-Al3_14-TI1_14 | 167.3(2) | C1A_14-C2A_14-C7A_14    | 125.8(7) |
| C2C_14-Al3_14-TI1_14 | 116.5(2) | C3A_14-C2A_14-Al1_14    | 72.7(4)  |
| C1C_14-Al3_14-TI1_14 | 133.7(2) | C1A_14-C2A_14-Al1_14    | 71.0(4)  |
| C3C_14-Al3_14-TI1_14 | 125.3(2) | C7A_14-C2A_14-Al1_14    | 125.9(5) |
| C1A_14-Al1_14-C5A_14 | 37.1(2)  | C4A_14-C3A_14-C2A_14    | 108.3(5) |
| C1A_14-Al1_14-C2A_14 | 37.3(2)  | C4A_14-C3A_14-C8A_14    | 125.6(7) |
| C5A_14-Al1_14-C2A_14 | 61.8(3)  | C2A_14-C3A_14-C8A_14    | 126.1(7) |
| C1A_14-Al1_14-C3A_14 | 61.7(3)  | C4A_14-C3A_14-Al1_14    | 72.1(4)  |
| C5A_14-Al1_14-C3A_14 | 61.2(3)  | C2A_14-C3A_14-Al1_14    | 70.5(4)  |
| C2A_14-Al1_14-C3A_14 | 36.8(2)  | C8A_14-C3A_14-Al1_14    | 122.8(5) |
| C1A_14-Al1_14-C4A_14 | 61.7(3)  | C3A_14-C4A_14-C5A_14    | 107.7(6) |
| C5A_14-Al1_14-C4A_14 | 36.8(2)  | C3A_14-C4A_14-C9A_14    | 127.4(7) |
| C2A_14-Al1_14-C4A_14 | 61.4(3)  | C5A_14-C4A_14-C9A_14    | 124.8(7) |
| C3A_14-Al1_14-C4A_14 | 36.4(3)  | C3A_14-C4A_14-Al1_14    | 71.5(4)  |
| C1A_14-Al1_14-TI1_14 | 168.0(3) | C5A_14-C4A_14-Al1_14    | 70.4(3)  |
| C5A_14-Al1_14-TI1_14 | 132.7(3) | C9A_14-C4A_14-Al1_14    | 122.2(5) |
| C2A_14-Al1_14-TI1_14 | 152.7(3) | C1A_14-C5A_14-C4A_14    | 108.5(5) |
| C3A_14-Al1_14-TI1_14 | 122.5(3) | C1A_14-C5A_14-C10A_14   | 126.5(6) |
| C4A_14-Al1_14-TI1_14 | 114.1(3) | C4A_14-C5A_14-C10A_14   | 125.0(6) |
| C5A_14-C1A_14-C2A_14 | 107.4(5) | C1A_14-C5A_14-Al1_14    | 71.0(4)  |
| C5A_14-C1A_14-C6A_14 | 125.3(6) | C4A_14-C5A_14-Al1_14    | 72.9(4)  |
| C2A_14-C1A_14-C6A_14 | 127.2(6) | C10A_14-C5A_14-Al1_14   | 123.6(5) |
| C5A_14-C1A_14-Al1_14 | 71.9(4)  | C5A_14-C10A_14-H10A_14  | 109.5    |
| C2A_14-C1A_14-Al1_14 | 71.7(4)  | C5A_14-C10A_14-H10B_14  | 109.5    |
| C6A_14-C1A_14-Al1_14 | 123.7(5) | H10A_14-C10A_14-H10B_14 | 109.5    |
| C3A_14-C2A_14-C1A_14 | 108.0(6) | C5A_14-C10A_14-H10C_14  | 109.5    |

|                             |          |                           |          |
|-----------------------------|----------|---------------------------|----------|
| H10A_14-C10A_14-<br>H10C_14 | 109.5    | C5B_14-C1B_14-<br>C6B_14  | 126.1(6) |
| H10B_14-C10A_14-<br>H10C_14 | 109.5    | C2B_14-C1B_14-<br>C6B_14  | 126.0(7) |
| C4A_14-C9A_14-<br>H9AA_14   | 109.5    | C5B_14-C1B_14-<br>A12_14  | 70.7(4)  |
| C4A_14-C9A_14-<br>H9AB_14   | 109.5    | C2B_14-C1B_14-<br>A12_14  | 71.6(3)  |
| H9AA_14-C9A_14-<br>H9AB_14  | 109.5    | C6B_14-C1B_14-<br>A12_14  | 123.8(5) |
| C4A_14-C9A_14-<br>H9AC_14   | 109.5    | C3B_14-C2B_14-<br>C1B_14  | 107.4(5) |
| H9AA_14-C9A_14-<br>H9AC_14  | 109.5    | C3B_14-C2B_14-<br>C7B_14  | 125.3(7) |
| H9AB_14-C9A_14-<br>H9AC_14  | 109.5    | C1B_14-C2B_14-<br>C7B_14  | 127.2(7) |
| C3A_14-C8A_14-<br>H8AA_14   | 109.5    | C3B_14-C2B_14-<br>A12_14  | 71.1(3)  |
| C3A_14-C8A_14-<br>H8AB_14   | 109.5    | C1B_14-C2B_14-<br>A12_14  | 71.3(3)  |
| H8AA_14-C8A_14-<br>H8AB_14  | 109.5    | C7B_14-C2B_14-<br>A12_14  | 123.3(5) |
| C3A_14-C8A_14-<br>H8AC_14   | 109.5    | C4B_14-C3B_14-<br>C2B_14  | 108.7(5) |
| H8AA_14-C8A_14-<br>H8AC_14  | 109.5    | C4B_14-C3B_14-<br>C8B_14  | 125.5(7) |
| H8AB_14-C8A_14-<br>H8AC_14  | 109.5    | C2B_14-C3B_14-<br>C8B_14  | 125.8(7) |
| C2A_14-C7A_14-<br>H7AA_14   | 109.5    | C4B_14-C3B_14-<br>A12_14  | 71.3(3)  |
| C2A_14-C7A_14-<br>H7AB_14   | 109.5    | C2B_14-C3B_14-<br>A12_14  | 72.1(3)  |
| H7AA_14-C7A_14-<br>H7AB_14  | 109.5    | C8B_14-C3B_14-<br>A12_14  | 123.5(5) |
| C2A_14-C7A_14-<br>H7AC_14   | 109.5    | C3B_14-C4B_14-<br>C5B_14  | 108.2(5) |
| H7AA_14-C7A_14-<br>H7AC_14  | 109.5    | C3B_14-C4B_14-<br>C9B_14  | 127.0(6) |
| H7AB_14-C7A_14-<br>H7AC_14  | 109.5    | C5B_14-C4B_14-<br>C9B_14  | 124.7(7) |
| C1A_14-C6A_14-<br>H6AA_14   | 109.5    | C3B_14-C4B_14-<br>A12_14  | 72.0(4)  |
| C1A_14-C6A_14-<br>H6AB_14   | 109.5    | C5B_14-C4B_14-<br>A12_14  | 71.3(4)  |
| H6AA_14-C6A_14-<br>H6AB_14  | 109.5    | C9B_14-C4B_14-<br>A12_14  | 126.4(5) |
| C1A_14-C6A_14-<br>H6AC_14   | 109.5    | C1B_14-C5B_14-<br>C4B_14  | 107.8(5) |
| H6AA_14-C6A_14-<br>H6AC_14  | 109.5    | C1B_14-C5B_14-<br>C10B_14 | 126.9(6) |
| H6AB_14-C6A_14-<br>H6AC_14  | 109.5    | C4B_14-C5B_14-<br>C10B_14 | 125.0(6) |
| C5B_14-C1B_14-<br>C2B_14    | 107.9(5) | C1B_14-C5B_14-<br>A12_14  | 72.3(4)  |

|                             |          |                            |          |
|-----------------------------|----------|----------------------------|----------|
| C4B_14-C5B_14-<br>A12_14    | 71.4(3)  | C1B_14-C6B_14-<br>H6BB_14  | 109.5    |
| C10B_14-C5B_14-<br>A12_14   | 126.6(5) | H6BA_14-C6B_14-<br>H6BB_14 | 109.5    |
| C5B_14-C10B_14-<br>H10D_14  | 109.5    | C1B_14-C6B_14-<br>H6BC_14  | 109.5    |
| C5B_14-C10B_14-<br>H10E_14  | 109.5    | H6BA_14-C6B_14-<br>H6BC_14 | 109.5    |
| H10D_14-C10B_14-<br>H10E_14 | 109.5    | H6BB_14-C6B_14-<br>H6BC_14 | 109.5    |
| C5B_14-C10B_14-<br>H10F_14  | 109.5    | C5C_14-C1C_14-<br>C2C_14   | 107.5(5) |
| H10D_14-C10B_14-<br>H10F_14 | 109.5    | C5C_14-C1C_14-<br>C6C_14   | 127.8(6) |
| H10E_14-C10B_14-<br>H10F_14 | 109.5    | C2C_14-C1C_14-<br>C6C_14   | 124.7(6) |
| C4B_14-C9B_14-<br>H9BA_14   | 109.5    | C5C_14-C1C_14-<br>A13_14   | 71.0(3)  |
| C4B_14-C9B_14-<br>H9BB_14   | 109.5    | C2C_14-C1C_14-<br>A13_14   | 71.2(3)  |
| H9BA_14-C9B_14-<br>H9BB_14  | 109.5    | C6C_14-C1C_14-<br>A13_14   | 124.8(5) |
| C4B_14-C9B_14-<br>H9BC_14   | 109.5    | C1C_14-C2C_14-<br>C3C_14   | 108.4(5) |
| H9BA_14-C9B_14-<br>H9BC_14  | 109.5    | C1C_14-C2C_14-<br>C7C_14   | 126.3(6) |
| H9BB_14-C9B_14-<br>H9BC_14  | 109.5    | C3C_14-C2C_14-<br>C7C_14   | 125.3(6) |
| C3B_14-C8B_14-<br>H8BA_14   | 109.5    | C1C_14-C2C_14-<br>A13_14   | 71.5(3)  |
| C3B_14-C8B_14-<br>H8BB_14   | 109.5    | C3C_14-C2C_14-<br>A13_14   | 71.3(3)  |
| H8BA_14-C8B_14-<br>H8BB_14  | 109.5    | C7C_14-C2C_14-<br>A13_14   | 124.7(5) |
| C3B_14-C8B_14-<br>H8BC_14   | 109.5    | C4C_14-C3C_14-<br>C2C_14   | 107.8(5) |
| H8BA_14-C8B_14-<br>H8BC_14  | 109.5    | C4C_14-C3C_14-<br>C8C_14   | 126.8(6) |
| H8BB_14-C8B_14-<br>H8BC_14  | 109.5    | C2C_14-C3C_14-<br>C8C_14   | 125.4(6) |
| C2B_14-C7B_14-<br>H7BA_14   | 109.5    | C4C_14-C3C_14-<br>A13_14   | 70.4(3)  |
| C2B_14-C7B_14-<br>H7BB_14   | 109.5    | C2C_14-C3C_14-<br>A13_14   | 71.2(3)  |
| H7BA_14-C7B_14-<br>H7BB_14  | 109.5    | C8C_14-C3C_14-<br>A13_14   | 123.3(5) |
| C2B_14-C7B_14-<br>H7BC_14   | 109.5    | C3C_14-C4C_14-<br>C5C_14   | 107.9(5) |
| H7BA_14-C7B_14-<br>H7BC_14  | 109.5    | C3C_14-C4C_14-<br>C9C_14   | 127.3(6) |
| H7BB_14-C7B_14-<br>H7BC_14  | 109.5    | C5C_14-C4C_14-<br>C9C_14   | 124.8(6) |
| C1B_14-C6B_14-<br>H6BA_14   | 109.5    | C3C_14-C4C_14-<br>A13_14   | 72.3(4)  |



|                             |          |                            |           |
|-----------------------------|----------|----------------------------|-----------|
| C5C_14-C4C_14-<br>A13_14    | 71.8(4)  | C2C_14-C7C_14-<br>H7CB_14  | 109.5     |
| C9C_14-C4C_14-<br>A13_14    | 123.8(5) | H7CA_14-C7C_14-<br>H7CB_14 | 109.5     |
| C1C_14-C5C_14-<br>C4C_14    | 108.4(5) | C2C_14-C7C_14-<br>H7CC_14  | 109.5     |
| C1C_14-C5C_14-<br>C10C_14   | 126.5(6) | H7CA_14-C7C_14-<br>H7CC_14 | 109.5     |
| C4C_14-C5C_14-<br>C10C_14   | 125.0(6) | H7CB_14-C7C_14-<br>H7CC_14 | 109.5     |
| C1C_14-C5C_14-<br>A13_14    | 71.7(4)  | C1C_14-C6C_14-<br>H6CA_14  | 109.5     |
| C4C_14-C5C_14-<br>A13_14    | 70.5(3)  | C1C_14-C6C_14-<br>H6CB_14  | 109.5     |
| C10C_14-C5C_14-<br>A13_14   | 126.8(6) | H6CA_14-C6C_14-<br>H6CB_14 | 109.5     |
| C5C_14-C10C_14-<br>H10G_14  | 109.5    | C1C_14-C6C_14-<br>H6CC_14  | 109.5     |
| C5C_14-C10C_14-<br>H10H_14  | 109.5    | H6CA_14-C6C_14-<br>H6CC_14 | 109.5     |
| H10G_14-C10C_14-<br>H10H_14 | 109.5    | H6CB_14-C6C_14-<br>H6CC_14 | 109.5     |
| C5C_14-C10C_14-<br>H10I_14  | 109.5    | A11_1-T11_1-A12_1          | 68.5(4)   |
| H10G_14-C10C_14-<br>H10I_14 | 109.5    | A11_1-T11_1-A13_1          | 67.3(3)   |
| H10H_14-C10C_14-<br>H10I_14 | 109.5    | A12_1-T11_1-A13_1          | 68.4(6)   |
| C4C_14-C9C_14-<br>H9CA_14   | 109.5    | C1B_1-A12_1-C5B_1          | 37.7(4)   |
| C4C_14-C9C_14-<br>H9CB_14   | 109.5    | C1B_1-A12_1-C2B_1          | 37.0(4)   |
| H9CA_14-C9C_14-<br>H9CB_14  | 109.5    | C5B_1-A12_1-C2B_1          | 62.6(6)   |
| C4C_14-C9C_14-<br>H9CC_14   | 109.5    | C1B_1-A12_1-C4B_1          | 62.4(7)   |
| H9CA_14-C9C_14-<br>H9CC_14  | 109.5    | C5B_1-A12_1-C4B_1          | 37.2(4)   |
| H9CB_14-C9C_14-<br>H9CC_14  | 109.5    | C2B_1-A12_1-C4B_1          | 62.7(6)   |
| C3C_14-C8C_14-<br>H8CA_14   | 109.5    | C1B_1-A12_1-C3B_1          | 61.2(7)   |
| C3C_14-C8C_14-<br>H8CB_14   | 109.5    | C5B_1-A12_1-C3B_1          | 61.4(6)   |
| H8CA_14-C8C_14-<br>H8CB_14  | 109.5    | C2B_1-A12_1-C3B_1          | 37.1(4)   |
| C3C_14-C8C_14-<br>H8CC_14   | 109.5    | C4B_1-A12_1-C3B_1          | 36.8(4)   |
| H8CA_14-C8C_14-<br>H8CC_14  | 109.5    | C1B_1-A12_1-T11_1          | 137.1(11) |
| H8CB_14-C8C_14-<br>H8CC_14  | 109.5    | C5B_1-A12_1-T11_1          | 167.3(10) |
| C2C_14-C7C_14-<br>H7CA_14   | 109.5    | C2B_1-A12_1-T11_1          | 121.0(10) |
|                             |          | C4B_1-A12_1-T11_1          | 155.3(10) |
|                             |          | C3B_1-A12_1-T11_1          | 129.7(9)  |
|                             |          | C3C_1-A13_1-C2C_1          | 37.1(4)   |
|                             |          | C3C_1-A13_1-C4C_1          | 37.1(5)   |
|                             |          | C2C_1-A13_1-C4C_1          | 62.2(6)   |
|                             |          | C3C_1-A13_1-C5C_1          | 61.5(6)   |
|                             |          | C2C_1-A13_1-C5C_1          | 61.9(6)   |
|                             |          | C4C_1-A13_1-C5C_1          | 36.8(4)   |
|                             |          | C3C_1-A13_1-C1C_1          | 61.1(7)   |
|                             |          | C2C_1-A13_1-C1C_1          | 36.9(4)   |
|                             |          | C4C_1-A13_1-C1C_1          | 61.1(6)   |
|                             |          | C5C_1-A13_1-C1C_1          | 36.4(4)   |
|                             |          | C3C_1-A13_1-T11_1          | 136.7(9)  |
|                             |          | C2C_1-A13_1-T11_1          | 117.0(9)  |
|                             |          | C4C_1-A13_1-T11_1          | 171.0(9)  |
|                             |          | C5C_1-A13_1-T11_1          | 151.8(9)  |
|                             |          | C1C_1-A13_1-T11_1          | 124.4(9)  |

|                    |           |                   |           |
|--------------------|-----------|-------------------|-----------|
| C2A_1-A11_1-C3A_1  | 36.5(4)   | H10B_1-C10A_1-    | 109.5     |
| C2A_1-A11_1-C1A_1  | 36.7(4)   | H10C_1            |           |
| C3A_1-A11_1-C1A_1  | 61.2(6)   | C4A_1-C9A_1-      | 109.5     |
| C2A_1-A11_1-C4A_1  | 60.5(6)   | H9AA_1            |           |
| C3A_1-A11_1-C4A_1  | 36.4(4)   | C4A_1-C9A_1-      | 109.5     |
| C1A_1-A11_1-C4A_1  | 60.8(6)   | H9AB_1            |           |
| C2A_1-A11_1-C5A_1  | 60.4(6)   | H9AA_1-C9A_1-     | 109.5     |
| C3A_1-A11_1-C5A_1  | 60.7(6)   | H9AB_1            |           |
| C1A_1-A11_1-C5A_1  | 36.1(4)   | C4A_1-C9A_1-      | 109.5     |
| C4A_1-A11_1-C5A_1  | 36.4(4)   | H9AC_1            |           |
| C2A_1-A11_1-T11_1  | 159.8(8)  | H9AA_1-C9A_1-     | 109.5     |
| C3A_1-A11_1-T11_1  | 126.3(7)  | H9AC_1            |           |
| C1A_1-A11_1-T11_1  | 159.8(8)  | H9AB_1-C9A_1-     | 109.5     |
| C4A_1-A11_1-T11_1  | 112.5(7)  | H9AC_1            |           |
| C5A_1-A11_1-T11_1  | 126.8(8)  | C3A_1-C8A_1-      | 109.5     |
| C5A_1-C1A_1-C2A_1  | 107.3(11) | H8AA_1            |           |
| C5A_1-C1A_1-C6A_1  | 127.9(19) | C3A_1-C8A_1-      | 109.5     |
| C2A_1-C1A_1-C6A_1  | 124.7(19) | H8AB_1            |           |
| C5A_1-C1A_1-A11_1  | 72.5(7)   | H8AA_1-C8A_1-     | 109.5     |
| C2A_1-C1A_1-A11_1  | 71.2(7)   | H8AB_1            |           |
| C6A_1-C1A_1-A11_1  | 119.6(18) | C3A_1-C8A_1-      | 109.5     |
| C3A_1-C2A_1-C1A_1  | 108.7(12) | H8AC_1            |           |
| C3A_1-C2A_1-C7A_1  | 127.7(18) | H8AA_1-C8A_1-     | 109.5     |
| C1A_1-C2A_1-C7A_1  | 123.4(18) | H8AC_1            |           |
| C3A_1-C2A_1-A11_1  | 72.0(7)   | H8AB_1-C8A_1-     | 109.5     |
| C1A_1-C2A_1-A11_1  | 72.1(7)   | H8AC_1            |           |
| C7A_1-C2A_1-A11_1  | 126(2)    | C2A_1-C7A_1-      | 109.5     |
| C2A_1-C3A_1-C4A_1  | 107.7(12) | H7AA_1            |           |
| C2A_1-C3A_1-C8A_1  | 127.3(19) | C2A_1-C7A_1-      | 109.5     |
| C4A_1-C3A_1-C8A_1  | 125.0(18) | H7AB_1            |           |
| C2A_1-C3A_1-A11_1  | 71.5(7)   | H7AA_1-C7A_1-     | 109.5     |
| C4A_1-C3A_1-A11_1  | 72.5(7)   | H7AB_1            |           |
| C8A_1-C3A_1-A11_1  | 121.3(18) | C2A_1-C7A_1-      | 109.5     |
| C3A_1-C4A_1-C5A_1  | 107.8(11) | H7AC_1            |           |
| C3A_1-C4A_1-C9A_1  | 123.7(18) | H7AA_1-C7A_1-     | 109.5     |
| C5A_1-C4A_1-C9A_1  | 128.5(19) | H7AC_1            |           |
| C3A_1-C4A_1-A11_1  | 71.1(7)   | H7AB_1-C7A_1-     | 109.5     |
| C5A_1-C4A_1-A11_1  | 71.8(7)   | H7AC_1            |           |
| C9A_1-C4A_1-A11_1  | 123.7(18) | C1A_1-C6A_1-      | 109.5     |
| C1A_1-C5A_1-C4A_1  | 108.6(12) | H6AA_1            |           |
| C1A_1-C5A_1-C10A_1 | 127.1(18) | C1A_1-C6A_1-      | 109.5     |
| C4A_1-C5A_1-C10A_1 | 124.3(18) | H6AB_1            |           |
| C1A_1-C5A_1-A11_1  | 71.4(7)   | H6AA_1-C6A_1-     | 109.5     |
| C4A_1-C5A_1-A11_1  | 71.8(7)   | H6AB_1            |           |
| C10A_1-C5A_1-A11_1 | 122.9(18) | C1A_1-C6A_1-      | 109.5     |
| C5A_1-C10A_1-      | 109.5     | H6AC_1            |           |
| H10A_1             |           | H6AA_1-C6A_1-     | 109.5     |
| C5A_1-C10A_1-      | 109.5     | H6AC_1            |           |
| H10B_1             |           | H6AB_1-C6A_1-     | 109.5     |
| H10A_1-C10A_1-     | 109.5     | H6AC_1            |           |
| H10B_1             |           | C2B_1-C1B_1-C5B_1 | 108.8(12) |
| C5A_1-C10A_1-      | 109.5     | C2B_1-C1B_1-C6B_1 | 129.4(19) |
| H10C_1             |           | C5B_1-C1B_1-C6B_1 | 121.8(18) |
| H10A_1-C10A_1-     | 109.5     | C2B_1-C1B_1-A12_1 | 72.1(7)   |
| H10C_1             |           | C5B_1-C1B_1-A12_1 | 71.2(7)   |

|                    |           |                    |           |
|--------------------|-----------|--------------------|-----------|
| C6B_1-C1B_1-AI2_1  | 123(2)    | H8BB_1-C8B_1-      | 109.5     |
| C1B_1-C2B_1-C3B_1  | 106.4(12) | H8BC_1             |           |
| C1B_1-C2B_1-C7B_1  | 126.7(19) | C2B_1-C7B_1-       | 109.5     |
| C3B_1-C2B_1-C7B_1  | 126.8(19) | H7BA_1             |           |
| C1B_1-C2B_1-AI2_1  | 70.9(7)   | C2B_1-C7B_1-H7BB_1 | 109.5     |
| C3B_1-C2B_1-AI2_1  | 72.0(7)   | H7BA_1-C7B_1-      | 109.5     |
| C7B_1-C2B_1-AI2_1  | 125(2)    | H7BB_1             |           |
| C4B_1-C3B_1-C2B_1  | 109.8(12) | C2B_1-C7B_1-H7BC_1 | 109.5     |
| C4B_1-C3B_1-C8B_1  | 127.9(19) | H7BA_1-C7B_1-      | 109.5     |
| C2B_1-C3B_1-C8B_1  | 122.2(19) | H7BC_1             |           |
| C4B_1-C3B_1-AI2_1  | 71.0(7)   | H7BB_1-C7B_1-      | 109.5     |
| C2B_1-C3B_1-AI2_1  | 70.9(7)   | H7BC_1             |           |
| C8B_1-C3B_1-AI2_1  | 122(2)    | C1B_1-C6B_1-       | 109.5     |
| C3B_1-C4B_1-C5B_1  | 107.0(12) | H6BA_1             |           |
| C3B_1-C4B_1-C9B_1  | 125.4(19) | C1B_1-C6B_1-H6BB_1 | 109.5     |
| C5B_1-C4B_1-C9B_1  | 127.6(19) | H6BA_1-C6B_1-      | 109.5     |
| C3B_1-C4B_1-AI2_1  | 72.2(7)   | H6BB_1             |           |
| C5B_1-C4B_1-AI2_1  | 70.9(7)   | C1B_1-C6B_1-H6BC_1 | 109.5     |
| C9B_1-C4B_1-AI2_1  | 123(2)    | H6BA_1-C6B_1-      | 109.5     |
| C4B_1-C5B_1-C1B_1  | 107.8(12) | H6BC_1             |           |
| C4B_1-C5B_1-C10B_1 | 126.1(18) | H6BB_1-C6B_1-      | 109.5     |
| C1B_1-C5B_1-C10B_1 | 126.0(18) | H6BC_1             |           |
| C4B_1-C5B_1-AI2_1  | 72.0(7)   | C5C_1-C1C_1-C2C_1  | 108.8(12) |
| C1B_1-C5B_1-AI2_1  | 71.1(7)   | C5C_1-C1C_1-C6C_1  | 128(2)    |
| C10B_1-C5B_1-AI2_1 | 124(2)    | C2C_1-C1C_1-C6C_1  | 123.4(19) |
| C5B_1-C10B_1-      | 109.5     | C5C_1-C1C_1-AI3_1  | 71.6(7)   |
| H10D_1             |           | C2C_1-C1C_1-AI3_1  | 70.0(7)   |
| C5B_1-C10B_1-      | 109.5     | C6C_1-C1C_1-AI3_1  | 123(2)    |
| H10E_1             |           | C3C_1-C2C_1-C1C_1  | 106.9(12) |
| H10D_1-C10B_1-     | 109.5     | C3C_1-C2C_1-C7C_1  | 127(2)    |
| H10E_1             |           | C1C_1-C2C_1-C7C_1  | 126(2)    |
| C5B_1-C10B_1-      | 109.5     | C3C_1-C2C_1-AI3_1  | 71.3(7)   |
| H10F_1             |           | C1C_1-C2C_1-AI3_1  | 73.1(7)   |
| H10D_1-C10B_1-     | 109.5     | C7C_1-C2C_1-AI3_1  | 124(2)    |
| H10F_1             |           | C2C_1-C3C_1-C4C_1  | 108.9(12) |
| H10E_1-C10B_1-     | 109.5     | C2C_1-C3C_1-C8C_1  | 128.1(19) |
| H10F_1             |           | C4C_1-C3C_1-C8C_1  | 121.9(19) |
| C4B_1-C9B_1-       | 109.5     | C2C_1-C3C_1-AI3_1  | 71.5(7)   |
| H9BA_1             |           | C4C_1-C3C_1-AI3_1  | 72.2(7)   |
| C4B_1-C9B_1-H9BB_1 | 109.5     | C8C_1-C3C_1-AI3_1  | 131(2)    |
| H9BA_1-C9B_1-      | 109.5     | C3C_1-C4C_1-C5C_1  | 107.5(12) |
| H9BB_1             |           | C3C_1-C4C_1-C9C_1  | 125.9(19) |
| C4B_1-C9B_1-H9BC_1 | 109.5     | C5C_1-C4C_1-C9C_1  | 126.5(19) |
| H9BA_1-C9B_1-      | 109.5     | C3C_1-C4C_1-AI3_1  | 70.8(7)   |
| H9BC_1             |           | C5C_1-C4C_1-AI3_1  | 72.3(7)   |
| H9BB_1-C9B_1-      | 109.5     | C9C_1-C4C_1-AI3_1  | 122(2)    |
| H9BC_1             |           | C1C_1-C5C_1-C4C_1  | 107.8(12) |
| C3B_1-C8B_1-       | 109.5     | C1C_1-C5C_1-C10C_1 | 127(2)    |
| H8BA_1             |           | C4C_1-C5C_1-C10C_1 | 125.1(19) |
| C3B_1-C8B_1-H8BB_1 | 109.5     | C1C_1-C5C_1-AI3_1  | 72.0(7)   |
| H8BA_1-C8B_1-      | 109.5     | C4C_1-C5C_1-AI3_1  | 70.8(7)   |
| H8BB_1             |           | C10C_1-C5C_1-AI3_1 | 122(2)    |
| C3B_1-C8B_1-H8BC_1 | 109.5     | C5C_1-C10C_1-      | 109.5     |
| H8BA_1-C8B_1-      | 109.5     | H10G_1             |           |
| H8BC_1             |           |                    |           |

|                          |           |                   |           |
|--------------------------|-----------|-------------------|-----------|
| C5C_1-C10C_1-<br>H10H_1  | 109.5     | F3_2-C2_2-F2_2    | 108.7(17) |
| H10G_1-C10C_1-<br>H10H_1 | 109.5     | F1_2-C2_2-C1_2    | 113.9(16) |
| C5C_1-C10C_1-<br>H10I_1  | 109.5     | F3_2-C2_2-C1_2    | 106.9(15) |
| H10G_1-C10C_1-<br>H10I_1 | 109.5     | F2_2-C2_2-C1_2    | 109.1(15) |
| H10H_1-C10C_1-<br>H10I_1 | 109.5     | F6_2-C3_2-F4_2    | 106.9(17) |
| C4C_1-C9C_1-H9CA_1       | 109.5     | F6_2-C3_2-F5_2    | 108.5(18) |
| C4C_1-C9C_1-H9CB_1       | 109.5     | F4_2-C3_2-F5_2    | 106.5(18) |
| H9CA_1-C9C_1-<br>H9CB_1  | 109.5     | F6_2-C3_2-C1_2    | 111.6(16) |
| C4C_1-C9C_1-H9CC_1       | 109.5     | F4_2-C3_2-C1_2    | 114.6(17) |
| H9CA_1-C9C_1-<br>H9CC_1  | 109.5     | F5_2-C3_2-C1_2    | 108.6(16) |
| H9CB_1-C9C_1-<br>H9CC_1  | 109.5     | F9_2-C4_2-F7_2    | 111.4(18) |
| C3C_1-C8C_1-H8CA_1       | 109.5     | F9_2-C4_2-F8_2    | 108.2(18) |
| C3C_1-C8C_1-H8CB_1       | 109.5     | F7_2-C4_2-F8_2    | 106.9(18) |
| H8CA_1-C8C_1-<br>H8CB_1  | 109.5     | F9_2-C4_2-C1_2    | 111.9(17) |
| C3C_1-C8C_1-H8CC_1       | 109.5     | F7_2-C4_2-C1_2    | 108.4(15) |
| H8CA_1-C8C_1-<br>H8CC_1  | 109.5     | F8_2-C4_2-C1_2    | 109.9(16) |
| H8CB_1-C8C_1-<br>H8CC_1  | 109.5     | C1_3-O1_3-Al14    | 149(2)    |
| C2C_1-C7C_1-H7CA_1       | 109.5     | O1_3-C1_3-C4_3    | 117.8(17) |
| C2C_1-C7C_1-H7CB_1       | 109.5     | O1_3-C1_3-C3_3    | 107.8(16) |
| H7CA_1-C7C_1-<br>H7CB_1  | 109.5     | C4_3-C1_3-C3_3    | 108.7(13) |
| C2C_1-C7C_1-H7CC_1       | 109.5     | O1_3-C1_3-C2_3    | 107.4(16) |
| H7CA_1-C7C_1-<br>H7CC_1  | 109.5     | C4_3-C1_3-C2_3    | 104.7(13) |
| H7CB_1-C7C_1-<br>H7CC_1  | 109.5     | C3_3-C1_3-C2_3    | 110.2(14) |
| C1C_1-C6C_1-H6CA_1       | 109.5     | F2_3-C2_3-F3_3    | 105.4(18) |
| C1C_1-C6C_1-H6CB_1       | 109.5     | F2_3-C2_3-F1_3    | 105.1(19) |
| H6CA_1-C6C_1-<br>H6CB_1  | 109.5     | F3_3-C2_3-F1_3    | 109.9(19) |
| C1C_1-C6C_1-H6CC_1       | 109.5     | F2_3-C2_3-C1_3    | 116.1(18) |
| H6CA_1-C6C_1-<br>H6CC_1  | 109.5     | F3_3-C2_3-C1_3    | 111.2(17) |
| H6CB_1-C6C_1-<br>H6CC_1  | 109.5     | F1_3-C2_3-C1_3    | 108.9(17) |
| C1_2-O1_2-Al12           | 152(3)    | F6_3-C3_3-F5_3    | 111.0(19) |
| O1_2-C1_2-C4_2           | 109.4(17) | F6_3-C3_3-F4_3    | 104.2(18) |
| O1_2-C1_2-C3_2           | 112.0(17) | F5_3-C3_3-F4_3    | 107.4(19) |
| C4_2-C1_2-C3_2           | 114.1(13) | F6_3-C3_3-C1_3    | 111.4(16) |
| O1_2-C1_2-C2_2           | 106.0(16) | F5_3-C3_3-C1_3    | 108.8(15) |
| C4_2-C1_2-C2_2           | 108.1(12) | F4_3-C3_3-C1_3    | 113.9(18) |
| C3_2-C1_2-C2_2           | 106.9(12) | F9_3-C4_3-F7_3    | 106.8(18) |
| F1_2-C2_2-F3_2           | 105.2(17) | F9_3-C4_3-F8_3    | 106.5(19) |
| F1_2-C2_2-F2_2           | 112.7(18) | F7_3-C4_3-F8_3    | 106.2(19) |
|                          |           | F9_3-C4_3-C1_3    | 118.0(17) |
|                          |           | F7_3-C4_3-C1_3    | 115.5(17) |
|                          |           | F8_3-C4_3-C1_3    | 102.7(15) |
|                          |           | C1_15-O1_15-Al14  | 151.9(18) |
|                          |           | O1_15-C1_15-C3_15 | 109.3(14) |
|                          |           | O1_15-C1_15-C2_15 | 108.0(13) |
|                          |           | C3_15-C1_15-C2_15 | 110.5(12) |
|                          |           | O1_15-C1_15-C4_15 | 112.3(14) |
|                          |           | C3_15-C1_15-C4_15 | 108.8(12) |
|                          |           | C2_15-C1_15-C4_15 | 108.0(12) |
|                          |           | F1_15-C2_15-F3_15 | 111.1(17) |
|                          |           | F1_15-C2_15-F2_15 | 109.0(17) |
|                          |           | F3_15-C2_15-F2_15 | 106.6(17) |
|                          |           | F1_15-C2_15-C1_15 | 108.4(13) |
|                          |           | F3_15-C2_15-C1_15 | 111.7(14) |
|                          |           | F2_15-C2_15-C1_15 | 109.9(14) |
|                          |           | F4_15-C3_15-F5_15 | 112.9(18) |

|                   |           |                   |           |
|-------------------|-----------|-------------------|-----------|
| F4_15-C3_15-F6_15 | 104.0(16) | F7_53-C4_53-F8_53 | 108.6(17) |
| F5_15-C3_15-F6_15 | 108.2(18) | F7_53-C4_53-F9_53 | 115.2(17) |
| F4_15-C3_15-C1_15 | 111.3(14) | F8_53-C4_53-F9_53 | 104.5(15) |
| F5_15-C3_15-C1_15 | 109.4(16) | F7_53-C4_53-C1_53 | 109.4(15) |
| F6_15-C3_15-C1_15 | 110.9(15) | F8_53-C4_53-C1_53 | 110.4(15) |
| F9_15-C4_15-F7_15 | 110.0(17) | F9_53-C4_53-C1_53 | 108.5(14) |
| F9_15-C4_15-F8_15 | 109.7(17) | C1_54-O1_54-AI11  | 147(2)    |
| F7_15-C4_15-F8_15 | 109.3(17) | O1_54-C1_54-C2_54 | 117.6(17) |
| F9_15-C4_15-C1_15 | 109.1(14) | O1_54-C1_54-C3_54 | 111.8(16) |
| F7_15-C4_15-C1_15 | 108.2(13) | C2_54-C1_54-C3_54 | 108.2(14) |
| F8_15-C4_15-C1_15 | 110.5(15) | O1_54-C1_54-C4_54 | 102.5(16) |
| C1_51-O1_51-AI13  | 156.3(19) | C2_54-C1_54-C4_54 | 108.0(14) |
| O1_51-C1_51-C4_51 | 111.5(14) | C3_54-C1_54-C4_54 | 108.2(14) |
| O1_51-C1_51-C2_51 | 112.0(14) | F3_54-C2_54-F1_54 | 109(2)    |
| C4_51-C1_51-C2_51 | 111.3(11) | F3_54-C2_54-F2_54 | 107.2(19) |
| O1_51-C1_51-C3_51 | 106.5(13) | F1_54-C2_54-F2_54 | 106.8(19) |
| C4_51-C1_51-C3_51 | 107.4(11) | F3_54-C2_54-C1_54 | 111.3(18) |
| C2_51-C1_51-C3_51 | 107.8(11) | F1_54-C2_54-C1_54 | 113.3(17) |
| F3_51-C2_51-F1_51 | 104.1(14) | F2_54-C2_54-C1_54 | 109.3(17) |
| F3_51-C2_51-F2_51 | 113.7(16) | F5_54-C3_54-F6_54 | 108(2)    |
| F1_51-C2_51-F2_51 | 108.2(15) | F5_54-C3_54-F4_54 | 109.4(19) |
| F3_51-C2_51-C1_51 | 109.8(13) | F6_54-C3_54-F4_54 | 106(2)    |
| F1_51-C2_51-C1_51 | 114.1(14) | F5_54-C3_54-C1_54 | 107.6(16) |
| F2_51-C2_51-C1_51 | 107.1(13) | F6_54-C3_54-C1_54 | 110.3(18) |
| F5_51-C3_51-F6_51 | 110.4(16) | F4_54-C3_54-C1_54 | 114.7(18) |
| F5_51-C3_51-F4_51 | 105.8(15) | C3_54-F4_54-F5_33 | 147(3)    |
| F6_51-C3_51-F4_51 | 107.6(15) | F8_54-C4_54-F7_54 | 112(2)    |
| F5_51-C3_51-C1_51 | 111.7(14) | F8_54-C4_54-F9_54 | 113(2)    |
| F6_51-C3_51-C1_51 | 112.1(13) | F7_54-C4_54-F9_54 | 110(2)    |
| F4_51-C3_51-C1_51 | 109.0(13) | F8_54-C4_54-C1_54 | 111.3(18) |
| F8_51-C4_51-F9_51 | 110.8(15) | F7_54-C4_54-C1_54 | 105.8(17) |
| F8_51-C4_51-F7_51 | 105.3(15) | F9_54-C4_54-C1_54 | 104.2(17) |
| F9_51-C4_51-F7_51 | 107.0(15) | C1_55-O1_55-AI12  | 148.6(10) |
| F8_51-C4_51-C1_51 | 112.3(13) | O1_55-C1_55-C3_55 | 112.6(10) |
| F9_51-C4_51-C1_51 | 110.7(13) | O1_55-C1_55-C4_55 | 107.2(10) |
| F7_51-C4_51-C1_51 | 110.5(13) | C3_55-C1_55-C4_55 | 107.5(10) |
| C1_53-O1_53-AI14  | 152(3)    | O1_55-C1_55-C2_55 | 106.8(9)  |
| O1_53-C1_53-C3_53 | 111.9(17) | C3_55-C1_55-C2_55 | 110.1(9)  |
| O1_53-C1_53-C2_53 | 109.4(18) | C4_55-C1_55-C2_55 | 112.7(10) |
| C3_53-C1_53-C2_53 | 109.4(12) | F2_55-C2_55-F3_55 | 110.4(13) |
| O1_53-C1_53-C4_53 | 107.4(17) | F2_55-C2_55-F1_55 | 107.3(11) |
| C3_53-C1_53-C4_53 | 112.2(12) | F3_55-C2_55-F1_55 | 107.5(12) |
| C2_53-C1_53-C4_53 | 106.4(12) | F2_55-C2_55-C1_55 | 110.7(10) |
| F3_53-C2_53-F2_53 | 108.6(17) | F3_55-C2_55-C1_55 | 110.2(10) |
| F3_53-C2_53-F1_53 | 110.0(17) | F1_55-C2_55-C1_55 | 110.7(11) |
| F2_53-C2_53-F1_53 | 110.1(17) | F4_55-C3_55-F5_55 | 109.8(12) |
| F3_53-C2_53-C1_53 | 110.4(15) | F4_55-C3_55-F6_55 | 107.7(13) |
| F2_53-C2_53-C1_53 | 109.7(14) | F5_55-C3_55-F6_55 | 105.5(12) |
| F1_53-C2_53-C1_53 | 107.9(15) | F4_55-C3_55-C1_55 | 107.8(10) |
| F4_53-C3_53-F6_53 | 108.2(17) | F5_55-C3_55-C1_55 | 113.4(11) |
| F4_53-C3_53-F5_53 | 108.9(16) | F6_55-C3_55-C1_55 | 112.5(13) |
| F6_53-C3_53-F5_53 | 107.4(17) | F8_55-C4_55-F9_55 | 109.2(12) |
| F4_53-C3_53-C1_53 | 109.2(15) | F8_55-C4_55-F7_55 | 108.1(11) |
| F6_53-C3_53-C1_53 | 112.5(17) | F9_55-C4_55-F7_55 | 106.2(13) |
| F5_53-C3_53-C1_53 | 110.6(14) | F8_55-C4_55-C1_55 | 111.3(12) |

|                    |           |                    |           |
|--------------------|-----------|--------------------|-----------|
| F9_55-C4_55-C1_55  | 109.5(12) | C1_57-C5_57-A11    | 73.7(14)  |
| F7_55-C4_55-C1_55  | 112.4(12) | C6_57-C5_57-A11    | 119(2)    |
| C1_56-O1_56-A112   | 168(4)    | C5_57-C6_57-H6A_57 | 109.5     |
| O1_56-C1_56-C2_56  | 108.8(19) | C5_57-C6_57-H6B_57 | 109.5     |
| O1_56-C1_56-C3_56  | 108.9(19) | H6A_57-C6_57-      | 109.5     |
| C2_56-C1_56-C3_56  | 110.7(15) | H6B_57             |           |
| O1_56-C1_56-C4_56  | 106.2(18) | C5_57-C6_57-H6C_57 | 109.5     |
| C2_56-C1_56-C4_56  | 112.8(16) | H6A_57-C6_57-      | 109.5     |
| C3_56-C1_56-C4_56  | 109.4(15) | H6C_57             |           |
| F1_56-C2_56-F2_56  | 108(2)    | H6B_57-C6_57-      | 109.5     |
| F1_56-C2_56-F3_56  | 108(2)    | H6C_57             |           |
| F2_56-C2_56-F3_56  | 106(2)    | C4_57-C7_57-H7A_57 | 109.5     |
| F1_56-C2_56-C1_56  | 111.7(19) | C4_57-C7_57-H7B_57 | 109.5     |
| F2_56-C2_56-C1_56  | 113.1(19) | H7A_57-C7_57-      | 109.5     |
| F3_56-C2_56-C1_56  | 110.7(19) | H7B_57             |           |
| F5_56-C3_56-F6_56  | 109(2)    | C4_57-C7_57-H7C_57 | 109.5     |
| F5_56-C3_56-F4_56  | 109(2)    | H7A_57-C7_57-      | 109.5     |
| F6_56-C3_56-F4_56  | 107(2)    | H7C_57             |           |
| F5_56-C3_56-C1_56  | 108.9(18) | H7B_57-C7_57-      | 109.5     |
| F6_56-C3_56-C1_56  | 112(2)    | H7C_57             |           |
| F4_56-C3_56-C1_56  | 111.6(19) | C3_57-C8_57-H8A_57 | 109.5     |
| F8_56-C4_56-F7_56  | 106(2)    | C3_57-C8_57-H8B_57 | 109.5     |
| F8_56-C4_56-F9_56  | 109(2)    | H8A_57-C8_57-      | 109.5     |
| F7_56-C4_56-F9_56  | 109(2)    | H8B_57             |           |
| F8_56-C4_56-C1_56  | 114(2)    | C3_57-C8_57-H8C_57 | 109.5     |
| F7_56-C4_56-C1_56  | 110.8(19) | H8A_57-C8_57-      | 109.5     |
| F9_56-C4_56-C1_56  | 107.8(19) | H8C_57             |           |
| C5_57-C1_57-C2_57  | 107.8(12) | H8B_57-C8_57-      | 109.5     |
| C5_57-C1_57-C10_57 | 128.6(18) | H8C_57             |           |
| C2_57-C1_57-C10_57 | 123.6(17) | C2_57-C9_57-H9A_57 | 109.5     |
| C5_57-C1_57-A11    | 69.6(15)  | C2_57-C9_57-H9B_57 | 109.5     |
| C2_57-C1_57-A11    | 77.2(9)   | H9A_57-C9_57-      | 109.5     |
| C10_57-C1_57-A11   | 120.0(17) | H9B_57             |           |
| C3_57-C2_57-C1_57  | 108.4(12) | C2_57-C9_57-H9C_57 | 109.5     |
| C3_57-C2_57-C9_57  | 125.0(17) | H9A_57-C9_57-      | 109.5     |
| C1_57-C2_57-C9_57  | 126.6(17) | H9C_57             |           |
| C3_57-C2_57-A11    | 74.5(9)   | H9B_57-C9_57-      | 109.5     |
| C1_57-C2_57-A11    | 67.7(9)   | H9C_57             |           |
| C9_57-C2_57-A11    | 126.3(16) | C1_57-C10_57-      | 109.5     |
| C2_57-C3_57-C4_57  | 107.7(12) | H10A_57            |           |
| C2_57-C3_57-C8_57  | 127.0(17) | C1_57-C10_57-      | 109.5     |
| C4_57-C3_57-C8_57  | 125.3(17) | H10B_57            |           |
| C2_57-C3_57-A11    | 71.6(9)   | H10A_57-C10_57-    | 109.5     |
| C4_57-C3_57-A11    | 68.2(14)  | H10B_57            |           |
| C8_57-C3_57-A11    | 125.3(15) | C1_57-C10_57-      | 109.5     |
| C5_57-C4_57-C3_57  | 108.2(11) | H10C_57            |           |
| C5_57-C4_57-C7_57  | 126.0(17) | H10A_57-C10_57-    | 109.5     |
| C3_57-C4_57-C7_57  | 125.7(17) | H10C_57            |           |
| C5_57-C4_57-A11    | 68.1(17)  | H10B_57-C10_57-    | 109.5     |
| C3_57-C4_57-A11    | 77.2(13)  | H10C_57            |           |
| C7_57-C4_57-A11    | 122(2)    | C1_58-O1_58-A113   | 140.9(16) |
| C4_57-C5_57-C1_57  | 108.0(12) | O1_58-C1_58-C4_58  | 115.6(14) |
| C4_57-C5_57-C6_57  | 126.3(17) | O1_58-C1_58-C2_58  | 106.5(13) |
| C1_57-C5_57-C6_57  | 125.6(17) | C4_58-C1_58-C2_58  | 109.5(12) |
| C4_57-C5_57-A11    | 75.7(17)  | O1_58-C1_58-C3_58  | 104.7(12) |

|                   |           |                   |           |
|-------------------|-----------|-------------------|-----------|
| C4_58-C1_58-C3_58 | 110.9(12) | F1_60-C2_60-C1_60 | 109.0(16) |
| C2_58-C1_58-C3_58 | 109.4(12) | F3_60-C2_60-C1_60 | 107.7(14) |
| F2_58-C2_58-F3_58 | 107.2(17) | F2_60-C2_60-C1_60 | 111.1(17) |
| F2_58-C2_58-F1_58 | 106.6(18) | F6_60-C3_60-F5_60 | 117.9(19) |
| F3_58-C2_58-F1_58 | 107.1(17) | F6_60-C3_60-F4_60 | 104.5(18) |
| F2_58-C2_58-C1_58 | 112.8(17) | F5_60-C3_60-F4_60 | 105.6(17) |
| F3_58-C2_58-C1_58 | 113.6(15) | F6_60-C3_60-C1_60 | 109.2(15) |
| F1_58-C2_58-C1_58 | 109.1(15) | F5_60-C3_60-C1_60 | 110.7(15) |
| F4_58-C3_58-F5_58 | 109.7(16) | F4_60-C3_60-C1_60 | 108.4(14) |
| F4_58-C3_58-F6_58 | 109.1(16) | F7_60-C4_60-F8_60 | 101.9(17) |
| F5_58-C3_58-F6_58 | 104.9(16) | F7_60-C4_60-F9_60 | 110.8(19) |
| F4_58-C3_58-C1_58 | 108.3(14) | F8_60-C4_60-F9_60 | 113.3(18) |
| F5_58-C3_58-C1_58 | 109.0(13) | F7_60-C4_60-C1_60 | 110.2(17) |
| F6_58-C3_58-C1_58 | 115.8(15) | F8_60-C4_60-C1_60 | 109.0(15) |
| F7_58-C4_58-F9_58 | 107.8(16) | F9_60-C4_60-C1_60 | 111.3(16) |
| F7_58-C4_58-F8_58 | 100.7(16) | C1_61-O1_61-AI14  | 140(3)    |
| F9_58-C4_58-F8_58 | 108.9(16) | O1_61-C1_61-C2_61 | 106.5(16) |
| F7_58-C4_58-C1_58 | 112.6(15) | O1_61-C1_61-C3_61 | 110.9(17) |
| F9_58-C4_58-C1_58 | 118.8(14) | C2_61-C1_61-C3_61 | 108.1(12) |
| F8_58-C4_58-C1_58 | 106.5(14) | O1_61-C1_61-C4_61 | 110.7(17) |
| C1_59-O1_59-AI10  | 154(3)    | C2_61-C1_61-C4_61 | 112.3(12) |
| O1_59-C1_59-C2_59 | 110.7(17) | C3_61-C1_61-C4_61 | 108.3(12) |
| O1_59-C1_59-C3_59 | 109.6(16) | F1_61-C2_61-F2_61 | 117.5(18) |
| C2_59-C1_59-C3_59 | 108.2(11) | F1_61-C2_61-F3_61 | 97.1(16)  |
| O1_59-C1_59-C4_59 | 109.7(17) | F2_61-C2_61-F3_61 | 107.5(17) |
| C2_59-C1_59-C4_59 | 109.0(12) | F1_61-C2_61-C1_61 | 108.4(14) |
| C3_59-C1_59-C4_59 | 109.6(12) | F2_61-C2_61-C1_61 | 111.7(14) |
| F1_59-C2_59-F3_59 | 105.3(16) | F3_61-C2_61-C1_61 | 114.1(15) |
| F1_59-C2_59-F2_59 | 107.9(17) | F5_61-C3_61-F6_61 | 108.5(16) |
| F3_59-C2_59-F2_59 | 106.8(16) | F5_61-C3_61-F4_61 | 108.8(17) |
| F1_59-C2_59-C1_59 | 111.0(13) | F6_61-C3_61-F4_61 | 112.2(17) |
| F3_59-C2_59-C1_59 | 114.2(15) | F5_61-C3_61-C1_61 | 107.2(14) |
| F2_59-C2_59-C1_59 | 111.3(15) | F6_61-C3_61-C1_61 | 113.6(15) |
| F5_59-C3_59-F6_59 | 108.2(17) | F4_61-C3_61-C1_61 | 106.4(14) |
| F5_59-C3_59-F4_59 | 109.1(16) | F8_61-C4_61-F9_61 | 104.5(16) |
| F6_59-C3_59-F4_59 | 108.9(17) | F8_61-C4_61-F7_61 | 102.8(17) |
| F5_59-C3_59-C1_59 | 110.5(13) | F9_61-C4_61-F7_61 | 115.4(17) |
| F6_59-C3_59-C1_59 | 111.2(16) | F8_61-C4_61-C1_61 | 112.6(16) |
| F4_59-C3_59-C1_59 | 108.9(13) | F9_61-C4_61-C1_61 | 111.4(14) |
| F7_59-C4_59-F9_59 | 104.4(16) | F7_61-C4_61-C1_61 | 109.8(15) |
| F7_59-C4_59-F8_59 | 106.1(16) | C1_62-O1_62-AI12  | 151.4(11) |
| F9_59-C4_59-F8_59 | 109.7(16) | O1_62-C1_62-C3_62 | 112.1(10) |
| F7_59-C4_59-C1_59 | 113.5(14) | O1_62-C1_62-C4_62 | 107.2(10) |
| F9_59-C4_59-C1_59 | 109.7(13) | C3_62-C1_62-C4_62 | 109.5(10) |
| F8_59-C4_59-C1_59 | 113.0(15) | O1_62-C1_62-C2_62 | 109.4(10) |
| C1_60-O1_60-AI13  | 150(3)    | C3_62-C1_62-C2_62 | 110.0(10) |
| O1_60-C1_60-C4_60 | 110.8(17) | C4_62-C1_62-C2_62 | 108.5(9)  |
| O1_60-C1_60-C2_60 | 113.1(16) | F3_62-C2_62-F1_62 | 104.8(14) |
| C4_60-C1_60-C2_60 | 109.1(12) | F3_62-C2_62-F2_62 | 108.8(12) |
| O1_60-C1_60-C3_60 | 107.7(16) | F1_62-C2_62-F2_62 | 108.4(14) |
| C4_60-C1_60-C3_60 | 108.1(12) | F3_62-C2_62-C1_62 | 112.0(11) |
| C2_60-C1_60-C3_60 | 107.9(12) | F1_62-C2_62-C1_62 | 110.3(13) |
| F1_60-C2_60-F3_60 | 116.0(19) | F2_62-C2_62-C1_62 | 112.3(11) |
| F1_60-C2_60-F2_60 | 106.0(18) | F6_62-C3_62-F5_62 | 103.9(12) |
| F3_60-C2_60-F2_60 | 107.1(19) | F6_62-C3_62-F4_62 | 107.9(13) |

|                   |           |
|-------------------|-----------|
| F5_62-C3_62-F4_62 | 109.3(13) |
| F6_62-C3_62-C1_62 | 115.2(12) |
| F5_62-C3_62-C1_62 | 109.9(11) |
| F4_62-C3_62-C1_62 | 110.3(11) |
| F9_62-C4_62-F7_62 | 108.4(11) |
| F9_62-C4_62-F8_62 | 104.3(11) |
| F7_62-C4_62-F8_62 | 106.5(11) |
| F9_62-C4_62-C1_62 | 113.2(10) |
| F7_62-C4_62-C1_62 | 112.3(10) |
| F8_62-C4_62-C1_62 | 111.6(10) |



S-Table 11: Bond lengths and angles for 4

| Atom-Atom | Length [Å] |           |            |
|-----------|------------|-----------|------------|
| Al1-N2    | 2.1420(16) | C6-H6B    | 0.9900     |
| Al1-N3    | 2.1518(15) | C7-H7A    | 0.9800     |
| Al1-N1    | 2.1650(15) | C7-H7B    | 0.9800     |
| Al1-Al4   | 2.7553(12) | C7-H7C    | 0.9800     |
| Al1-Al3   | 2.7598(10) | C8-C9     | 1.516(3)   |
| Al1-Al2   | 2.7800(10) | C8-H8A    | 0.9900     |
| Al2-C4_6  | 2.3148(18) | C8-H8B    | 0.9900     |
| Al2-C5_6  | 2.3262(17) | C9-H9A    | 0.9900     |
| Al2-C3_6  | 2.3569(17) | C9-H9B    | 0.9900     |
| Al2-C1_6  | 2.3747(17) | O1_1-C1_1 | 1.3495(19) |
| Al2-C2_6  | 2.3904(17) | C1_1-C3_1 | 1.554(2)   |
| Al2-Al4   | 2.7356(9)  | C1_1-C2_1 | 1.554(2)   |
| Al2-Al3   | 2.7895(8)  | C1_1-C4_1 | 1.555(2)   |
| Al3-C5_5  | 2.2795(17) | C2_1-F1_1 | 1.330(2)   |
| Al3-C4_5  | 2.3006(18) | C2_1-F3_1 | 1.336(2)   |
| Al3-C1_5  | 2.3747(17) | C2_1-F2_1 | 1.340(2)   |
| Al3-C3_5  | 2.4208(18) | C3_1-F4_1 | 1.324(2)   |
| Al3-C2_5  | 2.4680(18) | C3_1-F5_1 | 1.336(2)   |
| Al3-Al4   | 2.7358(9)  | C3_1-F6_1 | 1.344(2)   |
| Al4-C4_7  | 2.3128(18) | C4_1-F9_1 | 1.325(2)   |
| Al4-C3_7  | 2.3570(17) | C4_1-F7_1 | 1.338(2)   |
| Al4-C5_7  | 2.3807(17) | C4_1-F8_1 | 1.340(2)   |
| Al4-C2_7  | 2.4528(17) | O1_2-C1_2 | 1.3517(19) |
| Al4-C1_7  | 2.4691(18) | C1_2-C3_2 | 1.550(2)   |
| Al5-O1_4  | 1.7207(13) | C1_2-C2_2 | 1.555(2)   |
| Al5-O1_1  | 1.7263(12) | C1_2-C4_2 | 1.559(2)   |
| Al5-O1_2  | 1.7269(12) | C2_2-F3_2 | 1.329(2)   |
| Al5-O1_3  | 1.7269(13) | C2_2-F1_2 | 1.332(2)   |
| N1-C1     | 1.482(2)   | C2_2-F2_2 | 1.343(2)   |
| N1-C2     | 1.490(2)   | C3_2-F4_2 | 1.330(2)   |
| N1-C9     | 1.493(2)   | C3_2-F5_2 | 1.337(2)   |
| N2-C4     | 1.484(2)   | C3_2-F6_2 | 1.340(2)   |
| N2-C5     | 1.485(2)   | C4_2-F9_2 | 1.324(2)   |
| N2-C3     | 1.491(2)   | C4_2-F7_2 | 1.331(2)   |
| N3-C7     | 1.480(2)   | C4_2-F8_2 | 1.3458(19) |
| N3-C8     | 1.488(2)   | O1_3-C1_3 | 1.350(2)   |
| N3-C6     | 1.494(2)   | C1_3-C3_3 | 1.546(3)   |
| C1-H1A    | 0.9800     | C1_3-C2_3 | 1.550(3)   |
| C1-H1B    | 0.9800     | C1_3-C4_3 | 1.556(3)   |
| C1-H1C    | 0.9800     | C2_3-F3_3 | 1.327(2)   |
| C2-C3     | 1.512(2)   | C2_3-F1_3 | 1.327(2)   |
| C2-H2A    | 0.9900     | C2_3-F2_3 | 1.346(2)   |
| C2-H2B    | 0.9900     | C3_3-F4_3 | 1.328(3)   |
| C3-H3A    | 0.9900     | C3_3-F6_3 | 1.334(2)   |
| C3-H3B    | 0.9900     | C3_3-F5_3 | 1.342(3)   |
| C4-H4A    | 0.9800     | C4_3-F7_3 | 1.326(3)   |
| C4-H4B    | 0.9800     | C4_3-F9_3 | 1.329(3)   |
| C4-H4C    | 0.9800     | C4_3-F8_3 | 1.334(2)   |
| C5-C6     | 1.517(3)   | O1_4-C1_4 | 1.353(2)   |
| C5-H5A    | 0.9900     | C1_4-C3_4 | 1.550(2)   |
| C5-H5B    | 0.9900     | C1_4-C2_4 | 1.554(2)   |
| C6-H6A    | 0.9900     | C1_4-C4_4 | 1.555(3)   |
|           |            | C2_4-F3_4 | 1.325(2)   |
|           |            | C2_4-F1_4 | 1.332(3)   |
|           |            | C2_4-F2_4 | 1.340(2)   |

|              |          |                       |                  |
|--------------|----------|-----------------------|------------------|
| C3_4-F4_4    | 1.328(2) | C10_6-H10C_6          | 0.9800           |
| C3_4-F5_4    | 1.334(2) | C1_7-C2_7             | 1.413(2)         |
| C3_4-F6_4    | 1.340(2) | C1_7-C5_7             | 1.421(2)         |
| C4_4-F9_4    | 1.330(2) | C1_7-C10_7            | 1.503(2)         |
| C4_4-F7_4    | 1.333(2) | C2_7-C3_7             | 1.421(2)         |
| C4_4-F8_4    | 1.338(2) | C2_7-C9_7             | 1.501(2)         |
| C1_5-C2_5    | 1.415(2) | C3_7-C4_7             | 1.423(2)         |
| C1_5-C5_5    | 1.421(2) | C3_7-C8_7             | 1.496(2)         |
| C1_5-C10_5   | 1.501(3) | C4_7-C5_7             | 1.426(2)         |
| C2_5-C3_5    | 1.409(3) | C4_7-C7_7             | 1.501(2)         |
| C2_5-C9_5    | 1.504(3) | C5_7-C6_7             | 1.503(2)         |
| C3_5-C4_5    | 1.412(3) | C6_7-H6A_7            | 0.9800           |
| C3_5-C8_5    | 1.500(3) | C6_7-H6B_7            | 0.9800           |
| C4_5-C5_5    | 1.421(3) | C6_7-H6C_7            | 0.9800           |
| C4_5-C7_5    | 1.501(3) | C7_7-H7A_7            | 0.9800           |
| C5_5-C6_5    | 1.502(2) | C7_7-H7B_7            | 0.9800           |
| C6_5-H6A_5   | 0.9800   | C7_7-H7C_7            | 0.9800           |
| C6_5-H6B_5   | 0.9800   | C8_7-H8A_7            | 0.9800           |
| C6_5-H6C_5   | 0.9800   | C8_7-H8B_7            | 0.9800           |
| C7_5-H7A_5   | 0.9800   | C8_7-H8C_7            | 0.9800           |
| C7_5-H7B_5   | 0.9800   | C9_7-H9A_7            | 0.9800           |
| C7_5-H7C_5   | 0.9800   | C9_7-H9B_7            | 0.9800           |
| C8_5-H8A_5   | 0.9800   | C9_7-H9C_7            | 0.9800           |
| C8_5-H8B_5   | 0.9800   | C10_7-H10A_7          | 0.9800           |
| C8_5-H8C_5   | 0.9800   | C10_7-H10B_7          | 0.9800           |
| C9_5-H9A_5   | 0.9800   | C10_7-H10C_7          | 0.9800           |
| C9_5-H9B_5   | 0.9800   |                       |                  |
| C9_5-H9C_5   | 0.9800   | <b>Atom-Atom-Atom</b> | <b>Angle [°]</b> |
| C10_5-H10A_5 | 0.9800   | N2-Al1-N3             | 80.77(6)         |
| C10_5-H10B_5 | 0.9800   | N2-Al1-N1             | 80.26(6)         |
| C10_5-H10C_5 | 0.9800   | N3-Al1-N1             | 80.85(6)         |
| C1_6-C2_6    | 1.415(2) | N2-Al1-Al4            | 164.43(5)        |
| C1_6-C5_6    | 1.416(2) | N3-Al1-Al4            | 108.78(4)        |
| C1_6-C10_6   | 1.505(2) | N1-Al1-Al4            | 112.88(4)        |
| C2_6-C3_6    | 1.421(2) | N2-Al1-Al3            | 106.33(5)        |
| C2_6-C9_6    | 1.502(2) | N3-Al1-Al3            | 107.87(5)        |
| C3_6-C4_6    | 1.418(2) | N1-Al1-Al3            | 169.60(4)        |
| C3_6-C8_6    | 1.501(2) | Al4-Al1-Al3           | 59.48(2)         |
| C4_6-C5_6    | 1.419(2) | N2-Al1-Al2            | 109.37(5)        |
| C4_6-C7_6    | 1.501(2) | N3-Al1-Al2            | 165.88(4)        |
| C5_6-C6_6    | 1.498(2) | N1-Al1-Al2            | 110.03(5)        |
| C6_6-H6A_6   | 0.9800   | Al4-Al1-Al2           | 59.23(2)         |
| C6_6-H6B_6   | 0.9800   | Al3-Al1-Al2           | 60.47(3)         |
| C6_6-H6C_6   | 0.9800   | C4_6-Al2-C5_6         | 35.60(6)         |
| C7_6-H7A_6   | 0.9800   | C4_6-Al2-C3_6         | 35.33(6)         |
| C7_6-H7B_6   | 0.9800   | C5_6-Al2-C3_6         | 58.65(6)         |
| C7_6-H7C_6   | 0.9800   | C4_6-Al2-C1_6         | 58.68(6)         |
| C8_6-H8A_6   | 0.9800   | C5_6-Al2-C1_6         | 35.04(6)         |
| C8_6-H8B_6   | 0.9800   | C3_6-Al2-C1_6         | 58.16(6)         |
| C8_6-H8C_6   | 0.9800   | C4_6-Al2-C2_6         | 58.31(6)         |
| C9_6-H9A_6   | 0.9800   | C5_6-Al2-C2_6         | 57.99(6)         |
| C9_6-H9B_6   | 0.9800   | C3_6-Al2-C2_6         | 34.83(6)         |
| C9_6-H9C_6   | 0.9800   | C1_6-Al2-C2_6         | 34.56(6)         |
| C10_6-H10A_6 | 0.9800   | C4_6-Al2-Al4          | 133.89(5)        |
| C10_6-H10B_6 | 0.9800   | C5_6-Al2-Al4          | 115.24(5)        |

|               |            |               |            |
|---------------|------------|---------------|------------|
| C3_6-AI2-AI4  | 168.55(5)  | C3_7-AI4-AI2  | 148.59(5)  |
| C1_6-AI2-AI4  | 123.48(5)  | C5_7-AI4-AI2  | 114.11(5)  |
| C2_6-AI2-AI4  | 152.76(5)  | C2_7-AI4-AI2  | 169.29(5)  |
| C4_6-AI2-AI1  | 163.45(5)  | C1_7-AI4-AI2  | 135.94(5)  |
| C5_6-AI2-AI1  | 156.53(5)  | C4_7-AI4-AI3  | 126.90(5)  |
| C3_6-AI2-AI1  | 129.87(5)  | C3_7-AI4-AI3  | 114.27(5)  |
| C1_6-AI2-AI1  | 125.29(5)  | C5_7-AI4-AI3  | 159.74(5)  |
| C2_6-AI2-AI1  | 114.44(5)  | C2_7-AI4-AI3  | 129.30(5)  |
| AI4-AI2-AI1   | 59.93(3)   | C1_7-AI4-AI3  | 160.90(5)  |
| C4_6-AI2-AI3  | 116.39(5)  | AI2-AI4-AI3   | 61.31(2)   |
| C5_6-AI2-AI3  | 140.91(5)  | C4_7-AI4-AI1  | 172.38(5)  |
| C3_6-AI2-AI3  | 118.16(5)  | C3_7-AI4-AI1  | 147.59(5)  |
| C1_6-AI2-AI3  | 175.07(5)  | C5_7-AI4-AI1  | 137.07(5)  |
| C2_6-AI2-AI3  | 144.25(5)  | C2_7-AI4-AI1  | 120.91(5)  |
| AI4-AI2-AI3   | 59.352(19) | C1_7-AI4-AI1  | 116.76(5)  |
| AI1-AI2-AI3   | 59.408(19) | AI2-AI4-AI1   | 60.83(2)   |
| C5_5-AI3-C4_5 | 36.14(6)   | AI3-AI4-AI1   | 60.34(3)   |
| C5_5-AI3-C1_5 | 35.48(6)   | O1_4-AI5-O1_1 | 107.45(6)  |
| C4_5-AI3-C1_5 | 58.75(6)   | O1_4-AI5-O1_2 | 108.61(6)  |
| C5_5-AI3-C3_5 | 58.31(6)   | O1_1-AI5-O1_2 | 112.81(6)  |
| C4_5-AI3-C3_5 | 34.68(6)   | O1_4-AI5-O1_3 | 115.17(6)  |
| C1_5-AI3-C3_5 | 57.07(6)   | O1_1-AI5-O1_3 | 106.47(6)  |
| C5_5-AI3-C2_5 | 57.51(6)   | O1_2-AI5-O1_3 | 106.48(6)  |
| C4_5-AI3-C2_5 | 57.07(6)   | C1-N1-C2      | 108.61(13) |
| C1_5-AI3-C2_5 | 33.91(6)   | C1-N1-C9      | 110.35(14) |
| C3_5-AI3-C2_5 | 33.47(6)   | C2-N1-C9      | 111.40(14) |
| C5_5-AI3-AI4  | 119.50(5)  | C1-N1-AI1     | 111.09(11) |
| C4_5-AI3-AI4  | 147.70(5)  | C2-N1-AI1     | 104.53(10) |
| C1_5-AI3-AI4  | 116.65(5)  | C9-N1-AI1     | 110.73(11) |
| C3_5-AI3-AI4  | 172.63(5)  | C4-N2-C5      | 108.86(13) |
| C2_5-AI3-AI4  | 139.16(5)  | C4-N2-C3      | 109.57(13) |
| C5_5-AI3-AI1  | 170.15(5)  | C5-N2-C3      | 112.07(14) |
| C4_5-AI3-AI1  | 148.43(5)  | C4-N2-AI1     | 110.18(10) |
| C1_5-AI3-AI1  | 134.79(5)  | C5-N2-AI1     | 103.84(10) |
| C3_5-AI3-AI1  | 120.57(5)  | C3-N2-AI1     | 112.16(10) |
| C2_5-AI3-AI1  | 115.49(5)  | C7-N3-C8      | 109.10(13) |
| AI4-AI3-AI1   | 60.18(3)   | C7-N3-C6      | 109.56(13) |
| C5_5-AI3-AI2  | 129.10(5)  | C8-N3-C6      | 112.15(14) |
| C4_5-AI3-AI2  | 114.39(5)  | C7-N3-AI1     | 111.11(10) |
| C1_5-AI3-AI2  | 162.66(5)  | C8-N3-AI1     | 103.97(10) |
| C3_5-AI3-AI2  | 127.87(5)  | C6-N3-AI1     | 110.84(10) |
| C2_5-AI3-AI2  | 158.81(5)  | N1-C1-H1A     | 109.5      |
| AI4-AI3-AI2   | 59.343(19) | N1-C1-H1B     | 109.5      |
| AI1-AI3-AI2   | 60.13(2)   | H1A-C1-H1B    | 109.5      |
| C4_7-AI4-C3_7 | 35.47(6)   | N1-C1-H1C     | 109.5      |
| C4_7-AI4-C5_7 | 35.33(6)   | H1A-C1-H1C    | 109.5      |
| C3_7-AI4-C5_7 | 58.10(6)   | H1B-C1-H1C    | 109.5      |
| C4_7-AI4-C2_7 | 57.66(6)   | N1-C2-C3      | 110.31(14) |
| C3_7-AI4-C2_7 | 34.29(6)   | N1-C2-H2A     | 109.6      |
| C5_7-AI4-C2_7 | 56.71(6)   | C3-C2-H2A     | 109.6      |
| C4_7-AI4-C1_7 | 57.43(6)   | N1-C2-H2B     | 109.6      |
| C3_7-AI4-C1_7 | 56.72(6)   | C3-C2-H2B     | 109.6      |
| C5_7-AI4-C1_7 | 34.02(6)   | H2A-C2-H2B    | 108.1      |
| C2_7-AI4-C1_7 | 33.36(6)   | N2-C3-C2      | 109.76(14) |
| C4_7-AI4-AI2  | 119.00(5)  | N2-C3-H3A     | 109.7      |

|                |            |                |            |
|----------------|------------|----------------|------------|
| C2-C3-H3A      | 109.7      | F5_1-C3_1-F6_1 | 106.97(14) |
| N2-C3-H3B      | 109.7      | F4_1-C3_1-C1_1 | 111.02(14) |
| C2-C3-H3B      | 109.7      | F5_1-C3_1-C1_1 | 110.96(13) |
| H3A-C3-H3B     | 108.2      | F6_1-C3_1-C1_1 | 112.86(14) |
| N2-C4-H4A      | 109.5      | F9_1-C4_1-F7_1 | 107.44(14) |
| N2-C4-H4B      | 109.5      | F9_1-C4_1-F8_1 | 108.06(14) |
| H4A-C4-H4B     | 109.5      | F7_1-C4_1-F8_1 | 106.94(14) |
| N2-C4-H4C      | 109.5      | F9_1-C4_1-C1_1 | 110.66(14) |
| H4A-C4-H4C     | 109.5      | F7_1-C4_1-C1_1 | 110.72(14) |
| H4B-C4-H4C     | 109.5      | F8_1-C4_1-C1_1 | 112.79(14) |
| N2-C5-C6       | 109.96(14) | C1_2-O1_2-AI5  | 145.15(11) |
| N2-C5-H5A      | 109.7      | O1_2-C1_2-C3_2 | 110.92(13) |
| C6-C5-H5A      | 109.7      | O1_2-C1_2-C2_2 | 107.83(13) |
| N2-C5-H5B      | 109.7      | C3_2-C1_2-C2_2 | 109.54(14) |
| C6-C5-H5B      | 109.7      | O1_2-C1_2-C4_2 | 110.51(13) |
| H5A-C5-H5B     | 108.2      | C3_2-C1_2-C4_2 | 109.05(13) |
| N3-C6-C5       | 109.64(13) | C2_2-C1_2-C4_2 | 108.95(14) |
| N3-C6-H6A      | 109.7      | F3_2-C2_2-F1_2 | 107.79(15) |
| C5-C6-H6A      | 109.7      | F3_2-C2_2-F2_2 | 107.32(15) |
| N3-C6-H6B      | 109.7      | F1_2-C2_2-F2_2 | 107.75(15) |
| C5-C6-H6B      | 109.7      | F3_2-C2_2-C1_2 | 110.79(15) |
| H6A-C6-H6B     | 108.2      | F1_2-C2_2-C1_2 | 110.64(15) |
| N3-C7-H7A      | 109.5      | F2_2-C2_2-C1_2 | 112.35(15) |
| N3-C7-H7B      | 109.5      | F4_2-C3_2-F5_2 | 107.37(14) |
| H7A-C7-H7B     | 109.5      | F4_2-C3_2-F6_2 | 107.67(14) |
| N3-C7-H7C      | 109.5      | F5_2-C3_2-F6_2 | 107.43(14) |
| H7A-C7-H7C     | 109.5      | F4_2-C3_2-C1_2 | 110.67(14) |
| H7B-C7-H7C     | 109.5      | F5_2-C3_2-C1_2 | 110.59(14) |
| N3-C8-C9       | 110.70(14) | F6_2-C3_2-C1_2 | 112.88(14) |
| N3-C8-H8A      | 109.5      | F9_2-C4_2-F7_2 | 107.53(14) |
| C9-C8-H8A      | 109.5      | F9_2-C4_2-F8_2 | 107.89(14) |
| N3-C8-H8B      | 109.5      | F7_2-C4_2-F8_2 | 107.12(14) |
| C9-C8-H8B      | 109.5      | F9_2-C4_2-C1_2 | 110.95(14) |
| H8A-C8-H8B     | 108.1      | F7_2-C4_2-C1_2 | 111.06(14) |
| N1-C9-C8       | 110.09(14) | F8_2-C4_2-C1_2 | 112.09(14) |
| N1-C9-H9A      | 109.6      | C1_3-O1_3-AI5  | 147.60(12) |
| C8-C9-H9A      | 109.6      | O1_3-C1_3-C3_3 | 107.39(16) |
| N1-C9-H9B      | 109.6      | O1_3-C1_3-C2_3 | 111.18(15) |
| C8-C9-H9B      | 109.6      | C3_3-C1_3-C2_3 | 109.10(16) |
| H9A-C9-H9B     | 108.2      | O1_3-C1_3-C4_3 | 110.82(15) |
| C1_1-O1_1-AI5  | 149.27(11) | C3_3-C1_3-C4_3 | 109.33(17) |
| O1_1-C1_1-C3_1 | 107.81(13) | C2_3-C1_3-C4_3 | 108.98(16) |
| O1_1-C1_1-C2_1 | 112.24(13) | F3_3-C2_3-F1_3 | 107.46(17) |
| C3_1-C1_1-C2_1 | 109.10(13) | F3_3-C2_3-F2_3 | 107.29(16) |
| O1_1-C1_1-C4_1 | 109.33(13) | F1_3-C2_3-F2_3 | 106.95(17) |
| C3_1-C1_1-C4_1 | 109.46(13) | F3_3-C2_3-C1_3 | 111.09(17) |
| C2_1-C1_1-C4_1 | 108.85(13) | F1_3-C2_3-C1_3 | 111.47(16) |
| F1_1-C2_1-F3_1 | 107.30(14) | F2_3-C2_3-C1_3 | 112.32(16) |
| F1_1-C2_1-F2_1 | 107.74(14) | F4_3-C3_3-F6_3 | 107.76(19) |
| F3_1-C2_1-F2_1 | 107.43(14) | F4_3-C3_3-F5_3 | 107.5(2)   |
| F1_1-C2_1-C1_1 | 111.23(14) | F6_3-C3_3-F5_3 | 106.53(18) |
| F3_1-C2_1-C1_1 | 110.71(13) | F4_3-C3_3-C1_3 | 111.28(17) |
| F2_1-C2_1-C1_1 | 112.20(14) | F6_3-C3_3-C1_3 | 112.90(19) |
| F4_1-C3_1-F5_1 | 107.19(14) | F5_3-C3_3-C1_3 | 110.55(18) |
| F4_1-C3_1-F6_1 | 107.57(14) | F7_3-C4_3-F9_3 | 107.55(17) |

|                 |            |                   |            |
|-----------------|------------|-------------------|------------|
| F7_3-C4_3-F8_3  | 107.69(17) | C4_5-C5_5-C6_5    | 125.00(17) |
| F9_3-C4_3-F8_3  | 107.88(19) | C1_5-C5_5-C6_5    | 127.27(17) |
| F7_3-C4_3-C1_3  | 111.03(19) | C4_5-C5_5-AI3     | 72.74(10)  |
| F9_3-C4_3-C1_3  | 110.15(16) | C1_5-C5_5-AI3     | 75.92(10)  |
| F8_3-C4_3-C1_3  | 112.35(16) | C6_5-C5_5-AI3     | 119.34(12) |
| C1_4-O1_4-AI5   | 148.63(11) | C5_5-C6_5-H6A_5   | 109.5      |
| O1_4-C1_4-C3_4  | 109.99(14) | C5_5-C6_5-H6B_5   | 109.5      |
| O1_4-C1_4-C2_4  | 108.00(14) | H6A_5-C6_5-H6B_5  | 109.5      |
| C3_4-C1_4-C2_4  | 109.40(15) | C5_5-C6_5-H6C_5   | 109.5      |
| O1_4-C1_4-C4_4  | 111.51(14) | H6A_5-C6_5-H6C_5  | 109.5      |
| C3_4-C1_4-C4_4  | 108.68(14) | H6B_5-C6_5-H6C_5  | 109.5      |
| C2_4-C1_4-C4_4  | 109.23(15) | C4_5-C7_5-H7A_5   | 109.5      |
| F3_4-C2_4-F1_4  | 107.57(17) | C4_5-C7_5-H7B_5   | 109.5      |
| F3_4-C2_4-F2_4  | 107.97(17) | H7A_5-C7_5-H7B_5  | 109.5      |
| F1_4-C2_4-F2_4  | 107.48(16) | C4_5-C7_5-H7C_5   | 109.5      |
| F3_4-C2_4-C1_4  | 110.87(16) | H7A_5-C7_5-H7C_5  | 109.5      |
| F1_4-C2_4-C1_4  | 110.48(17) | H7B_5-C7_5-H7C_5  | 109.5      |
| F2_4-C2_4-C1_4  | 112.28(15) | C3_5-C8_5-H8A_5   | 109.5      |
| F4_4-C3_4-F5_4  | 107.47(16) | C3_5-C8_5-H8B_5   | 109.5      |
| F4_4-C3_4-F6_4  | 107.75(16) | H8A_5-C8_5-H8B_5  | 109.5      |
| F5_4-C3_4-F6_4  | 107.24(15) | C3_5-C8_5-H8C_5   | 109.5      |
| F4_4-C3_4-C1_4  | 110.70(15) | H8A_5-C8_5-H8C_5  | 109.5      |
| F5_4-C3_4-C1_4  | 111.21(15) | H8B_5-C8_5-H8C_5  | 109.5      |
| F6_4-C3_4-C1_4  | 112.27(15) | C2_5-C9_5-H9A_5   | 109.5      |
| F9_4-C4_4-F7_4  | 106.97(16) | C2_5-C9_5-H9B_5   | 109.5      |
| F9_4-C4_4-F8_4  | 107.78(16) | H9A_5-C9_5-H9B_5  | 109.5      |
| F7_4-C4_4-F8_4  | 107.30(16) | C2_5-C9_5-H9C_5   | 109.5      |
| F9_4-C4_4-C1_4  | 110.40(15) | H9A_5-C9_5-H9C_5  | 109.5      |
| F7_4-C4_4-C1_4  | 111.18(15) | H9B_5-C9_5-H9C_5  | 109.5      |
| F8_4-C4_4-C1_4  | 112.95(16) | C1_5-C10_5-H10A_5 | 109.5      |
| C2_5-C1_5-C5_5  | 107.70(16) | C1_5-C10_5-H10B_5 | 109.5      |
| C2_5-C1_5-C10_5 | 125.09(17) | H10A_5-C10_5-     | 109.5      |
| C5_5-C1_5-C10_5 | 126.99(17) | H10B_5            | 109.5      |
| C2_5-C1_5-AI3   | 76.66(10)  | C1_5-C10_5-H10C_5 | 109.5      |
| C5_5-C1_5-AI3   | 68.60(9)   | H10A_5-C10_5-     | 109.5      |
| C10_5-C1_5-AI3  | 124.61(12) | H10C_5            | 109.5      |
| C3_5-C2_5-C1_5  | 108.47(16) | H10B_5-C10_5-     | 109.5      |
| C3_5-C2_5-C9_5  | 126.23(18) | H10C_5            | 109.5      |
| C1_5-C2_5-C9_5  | 124.72(19) | C2_6-C1_6-C5_6    | 107.73(15) |
| C3_5-C2_5-AI3   | 71.42(10)  | C2_6-C1_6-C10_6   | 125.82(17) |
| C1_5-C2_5-AI3   | 69.43(9)   | C5_6-C1_6-C10_6   | 126.27(17) |
| C9_5-C2_5-AI3   | 131.79(13) | C2_6-C1_6-AI2     | 73.33(9)   |
| C2_5-C3_5-C4_5  | 108.05(16) | C5_6-C1_6-AI2     | 70.61(9)   |
| C2_5-C3_5-C8_5  | 125.8(2)   | C10_6-C1_6-AI2    | 125.45(12) |
| C4_5-C3_5-C8_5  | 125.8(2)   | C1_6-C2_6-C3_6    | 108.33(15) |
| C2_5-C3_5-AI3   | 75.10(10)  | C1_6-C2_6-C9_6    | 125.32(17) |
| C4_5-C3_5-AI3   | 68.00(10)  | C3_6-C2_6-C9_6    | 125.65(17) |
| C8_5-C3_5-AI3   | 127.83(13) | C1_6-C2_6-AI2     | 72.12(10)  |
| C3_5-C4_5-C5_5  | 108.11(16) | C3_6-C2_6-AI2     | 71.30(9)   |
| C3_5-C4_5-C7_5  | 124.77(18) | C9_6-C2_6-AI2     | 129.85(12) |
| C5_5-C4_5-C7_5  | 126.74(18) | C4_6-C3_6-C2_6    | 107.72(15) |
| C3_5-C4_5-AI3   | 77.32(10)  | C4_6-C3_6-C8_6    | 126.57(16) |
| C5_5-C4_5-AI3   | 71.12(10)  | C2_6-C3_6-C8_6    | 125.53(16) |
| C7_5-C4_5-AI3   | 123.16(13) | C4_6-C3_6-AI2     | 70.71(9)   |
| C4_5-C5_5-C1_5  | 107.67(15) | C2_6-C3_6-AI2     | 73.87(10)  |

|                   |            |                   |            |
|-------------------|------------|-------------------|------------|
| C8_6-C3_6-AI2     | 124.72(12) | C1_7-C2_7-AI4     | 73.95(9)   |
| C3_6-C4_6-C5_6    | 107.89(15) | C3_7-C2_7-AI4     | 69.16(9)   |
| C3_6-C4_6-C7_6    | 128.06(16) | C9_7-C2_7-AI4     | 124.90(11) |
| C5_6-C4_6-C7_6    | 123.92(16) | C2_7-C3_7-C4_7    | 108.03(14) |
| C3_6-C4_6-AI2     | 73.95(9)   | C2_7-C3_7-C8_7    | 126.96(16) |
| C5_6-C4_6-AI2     | 72.64(10)  | C4_7-C3_7-C8_7    | 124.64(15) |
| C7_6-C4_6-AI2     | 122.41(12) | C2_7-C3_7-AI4     | 76.55(9)   |
| C1_6-C5_6-C4_6    | 108.33(15) | C4_7-C3_7-AI4     | 70.57(9)   |
| C1_6-C5_6-C6_6    | 127.65(17) | C8_7-C3_7-AI4     | 124.08(11) |
| C4_6-C5_6-C6_6    | 123.76(17) | C3_7-C4_7-C5_7    | 107.71(14) |
| C1_6-C5_6-AI2     | 74.35(10)  | C3_7-C4_7-C7_7    | 124.34(15) |
| C4_6-C5_6-AI2     | 71.76(10)  | C5_7-C4_7-C7_7    | 127.87(15) |
| C6_6-C5_6-AI2     | 124.25(12) | C3_7-C4_7-AI4     | 73.96(9)   |
| C5_6-C6_6-H6A_6   | 109.5      | C5_7-C4_7-AI4     | 74.94(9)   |
| C5_6-C6_6-H6B_6   | 109.5      | C7_7-C4_7-AI4     | 119.63(11) |
| H6A_6-C6_6-H6B_6  | 109.5      | C1_7-C5_7-C4_7    | 107.87(14) |
| C5_6-C6_6-H6C_6   | 109.5      | C1_7-C5_7-C6_7    | 125.15(15) |
| H6A_6-C6_6-H6C_6  | 109.5      | C4_7-C5_7-C6_7    | 126.87(15) |
| H6B_6-C6_6-H6C_6  | 109.5      | C1_7-C5_7-AI4     | 76.40(9)   |
| C4_6-C7_6-H7A_6   | 109.5      | C4_7-C5_7-AI4     | 69.73(9)   |
| C4_6-C7_6-H7B_6   | 109.5      | C6_7-C5_7-AI4     | 122.66(11) |
| H7A_6-C7_6-H7B_6  | 109.5      | C5_7-C6_7-H6A_7   | 109.5      |
| C4_6-C7_6-H7C_6   | 109.5      | C5_7-C6_7-H6B_7   | 109.5      |
| H7A_6-C7_6-H7C_6  | 109.5      | H6A_7-C6_7-H6B_7  | 109.5      |
| H7B_6-C7_6-H7C_6  | 109.5      | C5_7-C6_7-H6C_7   | 109.5      |
| C3_6-C8_6-H8A_6   | 109.5      | H6A_7-C6_7-H6C_7  | 109.5      |
| C3_6-C8_6-H8B_6   | 109.5      | H6B_7-C6_7-H6C_7  | 109.5      |
| H8A_6-C8_6-H8B_6  | 109.5      | C4_7-C7_7-H7A_7   | 109.5      |
| C3_6-C8_6-H8C_6   | 109.5      | C4_7-C7_7-H7B_7   | 109.5      |
| H8A_6-C8_6-H8C_6  | 109.5      | H7A_7-C7_7-H7B_7  | 109.5      |
| H8B_6-C8_6-H8C_6  | 109.5      | C4_7-C7_7-H7C_7   | 109.5      |
| C2_6-C9_6-H9A_6   | 109.5      | H7A_7-C7_7-H7C_7  | 109.5      |
| C2_6-C9_6-H9B_6   | 109.5      | H7B_7-C7_7-H7C_7  | 109.5      |
| H9A_6-C9_6-H9B_6  | 109.5      | C3_7-C8_7-H8A_7   | 109.5      |
| C2_6-C9_6-H9C_6   | 109.5      | C3_7-C8_7-H8B_7   | 109.5      |
| H9A_6-C9_6-H9C_6  | 109.5      | H8A_7-C8_7-H8B_7  | 109.5      |
| H9B_6-C9_6-H9C_6  | 109.5      | C3_7-C8_7-H8C_7   | 109.5      |
| C1_6-C10_6-H10A_6 | 109.5      | H8A_7-C8_7-H8C_7  | 109.5      |
| C1_6-C10_6-H10B_6 | 109.5      | H8B_7-C8_7-H8C_7  | 109.5      |
| H10A_6-C10_6-     | 109.5      | C2_7-C9_7-H9A_7   | 109.5      |
| H10B_6            | 109.5      | C2_7-C9_7-H9B_7   | 109.5      |
| C1_6-C10_6-H10C_6 | 109.5      | H9A_7-C9_7-H9B_7  | 109.5      |
| H10A_6-C10_6-     | 109.5      | C2_7-C9_7-H9C_7   | 109.5      |
| H10C_6            | 109.5      | H9A_7-C9_7-H9C_7  | 109.5      |
| H10B_6-C10_6-     | 109.5      | H9B_7-C9_7-H9C_7  | 109.5      |
| H10C_6            | 109.5      | C1_7-C10_7-H10A_7 | 109.5      |
| C2_7-C1_7-C5_7    | 108.24(14) | C1_7-C10_7-H10B_7 | 109.5      |
| C2_7-C1_7-C10_7   | 125.14(16) | H10A_7-C10_7-     | 109.5      |
| C5_7-C1_7-C10_7   | 126.43(16) | H10B_7            | 109.5      |
| C2_7-C1_7-AI4     | 72.69(9)   | C1_7-C10_7-H10C_7 | 109.5      |
| C5_7-C1_7-AI4     | 69.58(9)   | H10A_7-C10_7-     | 109.5      |
| C10_7-C1_7-AI4    | 127.31(11) | H10C_7            | 109.5      |
| C1_7-C2_7-C3_7    | 108.15(14) | H10B_7-C10_7-     | 109.5      |
| C1_7-C2_7-C9_7    | 124.90(16) | H10C_7            | 109.5      |
| C3_7-C2_7-C9_7    | 126.89(16) |                   |            |



S-Table 12: Bond lengths and angles for **5**

| Atom-Atom | Length [Å] |           |          |
|-----------|------------|-----------|----------|
| Ga1-C1_5  | 2.440(4)   | C4-H4A    | 0.9900   |
| Ga1-Al2   | 2.7242(16) | C4-H4B    | 0.9900   |
| Ga1-Al3   | 2.7276(16) | C5-H5A    | 0.9900   |
| Ga1-Al1   | 2.8208(17) | C5-H5B    | 0.9900   |
| Al3-C5_6  | 2.312(3)   | C6-C7     | 1.515(6) |
| Al3-C1_6  | 2.318(3)   | C6-H6A    | 0.9900   |
| Al3-C4_6  | 2.350(3)   | C6-H6B    | 0.9900   |
| Al3-C2_6  | 2.356(3)   | C7-H7A    | 0.9900   |
| Al3-C3_6  | 2.378(3)   | C7-H7B    | 0.9900   |
| Al3-Al2   | 2.826(2)   | C8-C9     | 1.503(6) |
| Al3-Al1   | 2.8375(18) | C8-H8A    | 0.9900   |
| Al1-N1    | 2.108(3)   | C8-H8B    | 0.9900   |
| Al1-N3    | 2.132(3)   | C9-H9A    | 0.9900   |
| Al1-N2    | 2.141(3)   | C9-H9B    | 0.9900   |
| Al1-Al2   | 2.7997(19) | O1_1-C1_1 | 1.346(4) |
| Al2-C4_7  | 2.241(6)   | C1_1-C4_1 | 1.550(5) |
| Al2-C3_7  | 2.261(5)   | C1_1-C2_1 | 1.556(5) |
| Al2-C5_7  | 2.314(5)   | C1_1-C3_1 | 1.558(5) |
| Al2-C2_7  | 2.344(4)   | C2_1-F3_1 | 1.325(4) |
| Al2-C3_10 | 2.37(2)    | C2_1-F2_1 | 1.327(5) |
| Al2-C4_10 | 2.39(3)    | C2_1-F1_1 | 1.340(5) |
| Al2-C1_7  | 2.391(4)   | C3_1-F4_1 | 1.329(5) |
| Al2-C2_10 | 2.438(17)  | C3_1-F5_1 | 1.331(5) |
| Al2-C5_10 | 2.49(2)    | C3_1-F6_1 | 1.339(5) |
| Al2-C1_10 | 2.519(17)  | C4_1-F9_1 | 1.321(5) |
| Al4-O1_9  | 1.612(9)   | C4_1-F7_1 | 1.332(5) |
| Al4-O1_3  | 1.707(3)   | C4_1-F8_1 | 1.346(5) |
| Al4-O1_4  | 1.708(8)   | O1_2-C1_2 | 1.350(6) |
| Al4-O1_1  | 1.711(3)   | C1_2-C3_2 | 1.515(8) |
| Al4-O1_2  | 1.743(3)   | C1_2-C4_2 | 1.553(8) |
| Al4-O1_13 | 1.746(10)  | C1_2-C2_2 | 1.570(7) |
| Al4-O1_12 | 1.746(15)  | C2_2-F2_2 | 1.311(7) |
| Al4-O1_8  | 1.779(12)  | C2_2-F3_2 | 1.316(7) |
| N1-C4     | 1.487(4)   | C2_2-F1_2 | 1.335(7) |
| N1-C1     | 1.489(5)   | C3_2-F6_2 | 1.336(9) |
| N1-C9     | 1.497(4)   | C3_2-F5_2 | 1.337(9) |
| N2-C3     | 1.481(5)   | C3_2-F4_2 | 1.346(9) |
| N2-C7     | 1.489(5)   | C4_2-F7_2 | 1.295(7) |
| N2-C8     | 1.498(4)   | C4_2-F9_2 | 1.313(8) |
| N3-C2     | 1.486(4)   | C4_2-F8_2 | 1.354(7) |
| N3-C5     | 1.488(4)   | O1_3-C1_3 | 1.359(4) |
| N3-C6     | 1.498(5)   | C1_3-C2_3 | 1.532(6) |
| C1-H1A    | 0.9800     | C1_3-C3_3 | 1.546(5) |
| C1-H1B    | 0.9800     | C1_3-C4_3 | 1.552(5) |
| C1-H1C    | 0.9800     | C2_3-F3_3 | 1.318(6) |
| C2-H2A    | 0.9800     | C2_3-F1_3 | 1.336(6) |
| C2-H2B    | 0.9800     | C2_3-F2_3 | 1.347(5) |
| C2-H2C    | 0.9800     | C3_3-F6_3 | 1.319(5) |
| C3-H3A    | 0.9800     | C3_3-F4_3 | 1.326(6) |
| C3-H3B    | 0.9800     | C3_3-F5_3 | 1.330(5) |
| C3-H3C    | 0.9800     | C4_3-F9_3 | 1.309(5) |
| C4-C5     | 1.520(5)   | C4_3-F7_3 | 1.327(6) |
|           |            | C4_3-F8_3 | 1.345(5) |
|           |            | O1_4-C1_4 | 1.352(9) |
|           |            | C1_4-C3_4 | 1.543(8) |



|              |           |              |           |
|--------------|-----------|--------------|-----------|
| C1_4-C4_4    | 1.547(9)  | C9_6-H9A_6   | 0.9800    |
| C1_4-C2_4    | 1.549(9)  | C9_6-H9B_6   | 0.9800    |
| C2_4-F2_4    | 1.316(8)  | C9_6-H9C_6   | 0.9800    |
| C2_4-F3_4    | 1.322(9)  | C10_6-H10A_6 | 0.9800    |
| C2_4-F1_4    | 1.326(9)  | C10_6-H10B_6 | 0.9800    |
| C3_4-F6_4    | 1.328(10) | C10_6-H10C_6 | 0.9800    |
| C3_4-F5_4    | 1.333(9)  | C1_7-C2_7    | 1.396(7)  |
| C3_4-F4_4    | 1.334(10) | C1_7-C5_7    | 1.413(6)  |
| C4_4-F9_4    | 1.322(8)  | C1_7-C10_7   | 1.522(6)  |
| C4_4-F7_4    | 1.328(9)  | C2_7-C3_7    | 1.417(6)  |
| C4_4-F8_4    | 1.340(8)  | C2_7-C9_7    | 1.521(6)  |
| C1_5-C2_5    | 1.424(5)  | C3_7-C4_7    | 1.424(7)  |
| C1_5-C5_5    | 1.426(5)  | C3_7-C8_7    | 1.496(7)  |
| C1_5-C10_5   | 1.511(5)  | C4_7-C5_7    | 1.414(7)  |
| C2_5-C3_5    | 1.416(5)  | C4_7-C7_7    | 1.500(6)  |
| C2_5-C9_5    | 1.511(5)  | C5_7-C6_7    | 1.502(7)  |
| C3_5-C4_5    | 1.407(4)  | C6_7-H6A_7   | 0.9800    |
| C3_5-C8_5    | 1.507(5)  | C6_7-H6B_7   | 0.9800    |
| C4_5-C5_5    | 1.411(5)  | C6_7-H6C_7   | 0.9800    |
| C4_5-C7_5    | 1.510(5)  | C7_7-H7A_7   | 0.9800    |
| C5_5-C6_5    | 1.505(5)  | C7_7-H7B_7   | 0.9800    |
| C6_5-H6A_5   | 0.9800    | C7_7-H7C_7   | 0.9800    |
| C6_5-H6B_5   | 0.9800    | C8_7-H8A_7   | 0.9800    |
| C6_5-H6C_5   | 0.9800    | C8_7-H8B_7   | 0.9800    |
| C7_5-H7A_5   | 0.9800    | C8_7-H8C_7   | 0.9800    |
| C7_5-H7B_5   | 0.9800    | C9_7-H9A_7   | 0.9800    |
| C7_5-H7C_5   | 0.9800    | C9_7-H9B_7   | 0.9800    |
| C8_5-H8A_5   | 0.9800    | C9_7-H9C_7   | 0.9800    |
| C8_5-H8B_5   | 0.9800    | C10_7-H10A_7 | 0.9800    |
| C8_5-H8C_5   | 0.9800    | C10_7-H10B_7 | 0.9800    |
| C9_5-H9A_5   | 0.9800    | C10_7-H10C_7 | 0.9800    |
| C9_5-H9B_5   | 0.9800    | O1_8-C1_8    | 1.346(11) |
| C9_5-H9C_5   | 0.9800    | C1_8-C4_8    | 1.549(10) |
| C10_5-H10A_5 | 0.9800    | C1_8-C2_8    | 1.553(11) |
| C10_5-H10B_5 | 0.9800    | C1_8-C3_8    | 1.559(11) |
| C10_5-H10C_5 | 0.9800    | C2_8-F1_8    | 1.324(11) |
| C1_6-C5_6    | 1.414(5)  | C2_8-F3_8    | 1.338(11) |
| C1_6-C2_6    | 1.419(4)  | C2_8-F2_8    | 1.343(11) |
| C1_6-C10_6   | 1.504(5)  | C3_8-F6_8    | 1.324(10) |
| C2_6-C3_6    | 1.424(4)  | C3_8-F4_8    | 1.329(10) |
| C2_6-C9_6    | 1.504(5)  | C3_8-F5_8    | 1.336(10) |
| C3_6-C4_6    | 1.420(4)  | C4_8-F8_8    | 1.325(9)  |
| C3_6-C8_6    | 1.504(4)  | C4_8-F7_8    | 1.343(11) |
| C4_6-C5_6    | 1.421(4)  | C4_8-F9_8    | 1.345(10) |
| C4_6-C7_6    | 1.507(5)  | O1_9-C1_9    | 1.365(13) |
| C5_6-C6_6    | 1.503(4)  | C1_9-C4_9    | 1.531(12) |
| C6_6-H6A_6   | 0.9800    | C1_9-C3_9    | 1.540(12) |
| C6_6-H6B_6   | 0.9800    | C1_9-C2_9    | 1.550(12) |
| C6_6-H6C_6   | 0.9800    | C2_9-F1_9    | 1.304(13) |
| C7_6-H7A_6   | 0.9800    | C2_9-F2_9    | 1.325(13) |
| C7_6-H7B_6   | 0.9800    | C2_9-F3_9    | 1.338(13) |
| C7_6-H7C_6   | 0.9800    | C3_9-F6_9    | 1.304(13) |
| C8_6-H8A_6   | 0.9800    | C3_9-F5_9    | 1.317(13) |
| C8_6-H8B_6   | 0.9800    | C3_9-F4_9    | 1.334(13) |
| C8_6-H8C_6   | 0.9800    | C4_9-F8_9    | 1.309(12) |

|                |           |
|----------------|-----------|
| C4_9-F7_9      | 1.323(13) |
| C4_9-F9_9      | 1.323(12) |
| O1_12-C1_12    | 1.356(13) |
| C1_12-C3_12    | 1.539(12) |
| C1_12-C4_12    | 1.553(12) |
| C1_12-C2_12    | 1.556(12) |
| C2_12-F1_12    | 1.328(13) |
| C2_12-F3_12    | 1.333(13) |
| C2_12-F2_12    | 1.337(12) |
| C3_12-F4_12    | 1.331(13) |
| C3_12-F6_12    | 1.331(13) |
| C3_12-F5_12    | 1.333(13) |
| C4_12-F8_12    | 1.328(12) |
| C4_12-F9_12    | 1.331(13) |
| C4_12-F7_12    | 1.332(13) |
| F1_11-C1_11    | 1.364(18) |
| C1_11-C6_11    | 1.379(13) |
| C1_11-C2_11    | 1.384(13) |
| C2_11-C3_11    | 1.377(14) |
| C2_11-H2_11    | 0.9500    |
| C3_11-C4_11    | 1.392(14) |
| C3_11-H3_11    | 0.9500    |
| C4_11-C5_11    | 1.398(14) |
| C4_11-H4_11    | 0.9500    |
| C5_11-C6_11    | 1.359(12) |
| C5_11-H5_11    | 0.9500    |
| C6_11-H6_11    | 0.9500    |
| C1_10-C5_10    | 1.410(12) |
| C1_10-C2_10    | 1.410(12) |
| C1_10-C10_10   | 1.515(13) |
| C2_10-C3_10    | 1.413(13) |
| C2_10-C9_10    | 1.501(13) |
| C3_10-C4_10    | 1.409(12) |
| C3_10-C8_10    | 1.508(13) |
| C4_10-C5_10    | 1.426(13) |
| C4_10-C7_10    | 1.513(13) |
| C5_10-C6_10    | 1.505(13) |
| C6_10-H6A_10   | 0.9800    |
| C6_10-H6B_10   | 0.9800    |
| C6_10-H6C_10   | 0.9800    |
| C7_10-H7A_10   | 0.9800    |
| C7_10-H7B_10   | 0.9800    |
| C7_10-H7C_10   | 0.9800    |
| C8_10-H8A_10   | 0.9800    |
| C8_10-H8B_10   | 0.9800    |
| C8_10-H8C_10   | 0.9800    |
| C9_10-H9A_10   | 0.9800    |
| C9_10-H9B_10   | 0.9800    |
| C9_10-H9C_10   | 0.9800    |
| C10_10-H10A_10 | 0.9800    |
| C10_10-H10B_10 | 0.9800    |
| C10_10-H10C_10 | 0.9800    |
| O1_13-C1_13    | 1.380(12) |
| C1_13-C4_13    | 1.543(11) |
| C1_13-C3_13    | 1.550(12) |

|             |           |
|-------------|-----------|
| C1_13-C2_13 | 1.565(11) |
| C2_13-F2_13 | 1.325(11) |
| C2_13-F3_13 | 1.332(12) |
| C2_13-F1_13 | 1.332(11) |
| C3_13-F5_13 | 1.330(12) |
| C3_13-F6_13 | 1.330(13) |
| C3_13-F4_13 | 1.332(12) |
| C4_13-F9_13 | 1.344(13) |
| C4_13-F8_13 | 1.354(13) |
| C4_13-F7_13 | 1.357(13) |

| Atom-Atom-Atom | Angle [°]  |
|----------------|------------|
| C1_5-Ga1-Al2   | 131.05(9)  |
| C1_5-Ga1-Al3   | 137.39(9)  |
| Al2-Ga1-Al3    | 62.45(5)   |
| C1_5-Ga1-Al1   | 159.10(9)  |
| Al2-Ga1-Al1    | 60.62(4)   |
| Al3-Ga1-Al1    | 61.49(4)   |
| C5_6-Al3-C1_6  | 35.58(12)  |
| C5_6-Al3-C4_6  | 35.48(11)  |
| C1_6-Al3-C4_6  | 58.95(11)  |
| C5_6-Al3-C2_6  | 58.95(12)  |
| C1_6-Al3-C2_6  | 35.34(11)  |
| C4_6-Al3-C2_6  | 58.64(12)  |
| C5_6-Al3-C3_6  | 58.53(11)  |
| C1_6-Al3-C3_6  | 58.46(11)  |
| C4_6-Al3-C3_6  | 34.96(11)  |
| C2_6-Al3-C3_6  | 35.00(11)  |
| C5_6-Al3-Ga1   | 112.06(10) |
| C1_6-Al3-Ga1   | 134.32(9)  |
| C4_6-Al3-Ga1   | 117.85(9)  |
| C2_6-Al3-Ga1   | 169.61(9)  |
| C3_6-Al3-Ga1   | 147.20(9)  |
| C5_6-Al3-Al2   | 136.52(9)  |
| C1_6-Al3-Al2   | 116.78(9)  |
| C4_6-Al3-Al2   | 171.32(9)  |
| C2_6-Al3-Al2   | 123.10(9)  |
| C3_6-Al3-Al2   | 151.31(10) |
| Ga1-Al3-Al2    | 58.72(4)   |
| C5_6-Al3-Al1   | 159.15(10) |
| C1_6-Al3-Al1   | 162.05(10) |
| C4_6-Al3-Al1   | 127.37(9)  |
| C2_6-Al3-Al1   | 129.43(9)  |
| C3_6-Al3-Al1   | 115.44(9)  |
| Ga1-Al3-Al1    | 60.87(4)   |
| Al2-Al3-Al1    | 59.25(4)   |
| N1-Al1-N3      | 81.79(11)  |
| N1-Al1-N2      | 81.29(11)  |
| N3-Al1-N2      | 81.21(12)  |
| N1-Al1-Al2     | 109.68(9)  |
| N3-Al1-Al2     | 106.53(10) |
| N2-Al1-Al2     | 167.11(9)  |
| N1-Al1-Ga1     | 163.24(9)  |
| N3-Al1-Ga1     | 111.72(8)  |
| N2-Al1-Ga1     | 109.82(9)  |

|                 |            |                |          |
|-----------------|------------|----------------|----------|
| Al2-Al1-Ga1     | 57.98(4)   | O1_12-Al4-O1_8 | 123.4(8) |
| N1-Al1-Al3      | 107.18(9)  | C4-N1-C1       | 109.9(3) |
| N3-Al1-Al3      | 165.61(9)  | C4-N1-C9       | 111.2(3) |
| N2-Al1-Al3      | 110.86(10) | C1-N1-C9       | 108.4(3) |
| Al2-Al1-Al3     | 60.17(5)   | C4-N1-Al1      | 111.3(2) |
| Ga1-Al1-Al3     | 57.64(3)   | C1-N1-Al1      | 110.7(2) |
| C4_7-Al2-C3_7   | 36.89(18)  | C9-N1-Al1      | 105.2(2) |
| C4_7-Al2-C5_7   | 36.12(17)  | C3-N2-C7       | 110.6(3) |
| C3_7-Al2-C5_7   | 59.93(17)  | C3-N2-C8       | 109.8(3) |
| C4_7-Al2-C2_7   | 59.78(16)  | C7-N2-C8       | 111.6(3) |
| C3_7-Al2-C2_7   | 35.78(16)  | C3-N2-Al1      | 109.8(2) |
| C5_7-Al2-C2_7   | 58.11(17)  | C7-N2-Al1      | 103.8(2) |
| C3_10-Al2-C4_10 | 34.5(4)    | C8-N2-Al1      | 111.1(2) |
| C4_7-Al2-C1_7   | 59.47(16)  | C2-N3-C5       | 108.8(3) |
| C3_7-Al2-C1_7   | 59.06(16)  | C2-N3-C6       | 109.8(3) |
| C5_7-Al2-C1_7   | 34.92(15)  | C5-N3-C6       | 112.6(3) |
| C2_7-Al2-C1_7   | 34.28(16)  | C2-N3-Al1      | 111.0(2) |
| C3_10-Al2-C2_10 | 34.2(4)    | C5-N3-Al1      | 103.2(2) |
| C4_10-Al2-C2_10 | 56.4(6)    | C6-N3-Al1      | 111.4(2) |
| C3_10-Al2-C5_10 | 56.3(5)    | N1-C1-H1A      | 109.5    |
| C4_10-Al2-C5_10 | 33.9(4)    | N1-C1-H1B      | 109.5    |
| C2_10-Al2-C5_10 | 55.2(5)    | H1A-C1-H1B     | 109.5    |
| C3_10-Al2-C1_10 | 55.8(5)    | N1-C1-H1C      | 109.5    |
| C4_10-Al2-C1_10 | 55.5(5)    | H1A-C1-H1C     | 109.5    |
| C2_10-Al2-C1_10 | 33.0(3)    | H1B-C1-H1C     | 109.5    |
| C5_10-Al2-C1_10 | 32.7(3)    | N3-C2-H2A      | 109.5    |
| C4_7-Al2-Ga1    | 122.30(15) | N3-C2-H2B      | 109.5    |
| C3_7-Al2-Ga1    | 156.35(14) | H2A-C2-H2B     | 109.5    |
| C5_7-Al2-Ga1    | 110.94(14) | N3-C2-H2C      | 109.5    |
| C2_7-Al2-Ga1    | 160.78(14) | H2A-C2-H2C     | 109.5    |
| C3_10-Al2-Ga1   | 117.8(4)   | H2B-C2-H2C     | 109.5    |
| C4_10-Al2-Ga1   | 115.9(5)   | N2-C3-H3A      | 109.5    |
| C1_7-Al2-Ga1    | 127.55(14) | N2-C3-H3B      | 109.5    |
| C2_10-Al2-Ga1   | 144.8(4)   | H3A-C3-H3B     | 109.5    |
| C5_10-Al2-Ga1   | 140.1(4)   | N2-C3-H3C      | 109.5    |
| C1_10-Al2-Ga1   | 171.4(4)   | H3A-C3-H3C     | 109.5    |
| C4_7-Al2-Al1    | 175.90(16) | H3B-C3-H3C     | 109.5    |
| C3_7-Al2-Al1    | 139.08(14) | N1-C4-C5       | 109.7(3) |
| C5_7-Al2-Al1    | 146.08(14) | N1-C4-H4A      | 109.7    |
| C2_7-Al2-Al1    | 117.47(12) | C5-C4-H4A      | 109.7    |
| C3_10-Al2-Al1   | 139.0(5)   | N1-C4-H4B      | 109.7    |
| C4_10-Al2-Al1   | 172.3(5)   | C5-C4-H4B      | 109.7    |
| C1_7-Al2-Al1    | 120.35(12) | H4A-C4-H4B     | 108.2    |
| C2_10-Al2-Al1   | 121.0(4)   | N3-C5-C4       | 110.2(3) |
| C5_10-Al2-Al1   | 152.4(4)   | N3-C5-H5A      | 109.6    |
| C1_10-Al2-Al1   | 127.1(4)   | C4-C5-H5A      | 109.6    |
| Ga1-Al2-Al1     | 61.40(4)   | N3-C5-H5B      | 109.6    |
| O1_3-Al4-O1_4   | 109.6(4)   | C4-C5-H5B      | 109.6    |
| O1_3-Al4-O1_1   | 109.31(16) | H5A-C5-H5B     | 108.1    |
| O1_4-Al4-O1_1   | 108.1(4)   | N3-C6-C7       | 109.1(3) |
| O1_3-Al4-O1_2   | 111.48(16) | N3-C6-H6A      | 109.9    |
| O1_4-Al4-O1_2   | 112.0(4)   | C7-C6-H6A      | 109.9    |
| O1_1-Al4-O1_2   | 106.10(19) | N3-C6-H6B      | 109.9    |
| O1_9-Al4-O1_12  | 111.6(7)   | C7-C6-H6B      | 109.9    |
| O1_9-Al4-O1_8   | 71.5(6)    | H6A-C6-H6B     | 108.3    |

|                |          |                |           |
|----------------|----------|----------------|-----------|
| N2-C7-C6       | 110.4(3) | F1_2-C2_2-C1_2 | 108.1(5)  |
| N2-C7-H7A      | 109.6    | F6_2-C3_2-F5_2 | 110.2(8)  |
| C6-C7-H7A      | 109.6    | F6_2-C3_2-F4_2 | 106.5(7)  |
| N2-C7-H7B      | 109.6    | F5_2-C3_2-F4_2 | 105.6(8)  |
| C6-C7-H7B      | 109.6    | F6_2-C3_2-C1_2 | 111.3(7)  |
| H7A-C7-H7B     | 108.1    | F5_2-C3_2-C1_2 | 111.7(6)  |
| N2-C8-C9       | 109.4(3) | F4_2-C3_2-C1_2 | 111.3(7)  |
| N2-C8-H8A      | 109.8    | F7_2-C4_2-F9_2 | 107.0(7)  |
| C9-C8-H8A      | 109.8    | F7_2-C4_2-F8_2 | 106.7(6)  |
| N2-C8-H8B      | 109.8    | F9_2-C4_2-F8_2 | 108.5(6)  |
| C9-C8-H8B      | 109.8    | F7_2-C4_2-C1_2 | 114.5(6)  |
| H8A-C8-H8B     | 108.2    | F9_2-C4_2-C1_2 | 111.5(5)  |
| N1-C9-C8       | 110.6(3) | F8_2-C4_2-C1_2 | 108.4(6)  |
| N1-C9-H9A      | 109.5    | C1_3-O1_3-AI4  | 151.5(2)  |
| C8-C9-H9A      | 109.5    | O1_3-C1_3-C2_3 | 110.9(3)  |
| N1-C9-H9B      | 109.5    | O1_3-C1_3-C3_3 | 111.3(3)  |
| C8-C9-H9B      | 109.5    | C2_3-C1_3-C3_3 | 108.5(4)  |
| H9A-C9-H9B     | 108.1    | O1_3-C1_3-C4_3 | 107.3(3)  |
| C1_1-O1_1-AI4  | 148.0(3) | C2_3-C1_3-C4_3 | 110.0(4)  |
| O1_1-C1_1-C4_1 | 107.7(3) | C3_3-C1_3-C4_3 | 108.8(3)  |
| O1_1-C1_1-C2_1 | 111.5(3) | F3_3-C2_3-F1_3 | 109.0(4)  |
| C4_1-C1_1-C2_1 | 109.6(3) | F3_3-C2_3-F2_3 | 107.5(5)  |
| O1_1-C1_1-C3_1 | 109.5(3) | F1_3-C2_3-F2_3 | 106.6(4)  |
| C4_1-C1_1-C3_1 | 109.7(3) | F3_3-C2_3-C1_3 | 110.8(4)  |
| C2_1-C1_1-C3_1 | 108.9(3) | F1_3-C2_3-C1_3 | 109.6(4)  |
| F3_1-C2_1-F2_1 | 108.5(4) | F2_3-C2_3-C1_3 | 113.2(4)  |
| F3_1-C2_1-F1_1 | 107.4(4) | F6_3-C3_3-F4_3 | 107.9(4)  |
| F2_1-C2_1-F1_1 | 107.0(4) | F6_3-C3_3-F5_3 | 108.2(4)  |
| F3_1-C2_1-C1_1 | 110.8(3) | F4_3-C3_3-F5_3 | 105.7(4)  |
| F2_1-C2_1-C1_1 | 112.8(3) | F6_3-C3_3-C1_3 | 113.4(4)  |
| F1_1-C2_1-C1_1 | 110.1(4) | F4_3-C3_3-C1_3 | 110.2(4)  |
| F4_1-C3_1-F5_1 | 107.9(4) | F5_3-C3_3-C1_3 | 111.1(4)  |
| F4_1-C3_1-F6_1 | 107.4(3) | F9_3-C4_3-F7_3 | 106.9(5)  |
| F5_1-C3_1-F6_1 | 107.8(4) | F9_3-C4_3-F8_3 | 108.3(4)  |
| F4_1-C3_1-C1_1 | 110.8(3) | F7_3-C4_3-F8_3 | 107.1(4)  |
| F5_1-C3_1-C1_1 | 110.7(3) | F9_3-C4_3-C1_3 | 111.5(3)  |
| F6_1-C3_1-C1_1 | 112.1(3) | F7_3-C4_3-C1_3 | 110.8(4)  |
| F9_1-C4_1-F7_1 | 106.8(4) | F8_3-C4_3-C1_3 | 111.9(4)  |
| F9_1-C4_1-F8_1 | 106.9(4) | C1_4-O1_4-AI4  | 149.4(9)  |
| F7_1-C4_1-F8_1 | 107.3(3) | O1_4-C1_4-C3_4 | 111.8(7)  |
| F9_1-C4_1-C1_1 | 111.5(3) | O1_4-C1_4-C4_4 | 111.9(7)  |
| F7_1-C4_1-C1_1 | 111.8(3) | C3_4-C1_4-C4_4 | 111.0(6)  |
| F8_1-C4_1-C1_1 | 112.1(3) | O1_4-C1_4-C2_4 | 104.6(7)  |
| C1_2-O1_2-AI4  | 149.5(4) | C3_4-C1_4-C2_4 | 109.6(7)  |
| O1_2-C1_2-C3_2 | 111.8(5) | C4_4-C1_4-C2_4 | 107.6(6)  |
| O1_2-C1_2-C4_2 | 107.0(5) | F2_4-C2_4-F3_4 | 110.0(8)  |
| C3_2-C1_2-C4_2 | 107.9(6) | F2_4-C2_4-F1_4 | 108.8(7)  |
| O1_2-C1_2-C2_2 | 110.7(4) | F3_4-C2_4-F1_4 | 108.4(8)  |
| C3_2-C1_2-C2_2 | 109.6(5) | F2_4-C2_4-C1_4 | 111.4(8)  |
| C4_2-C1_2-C2_2 | 109.9(5) | F3_4-C2_4-C1_4 | 105.6(8)  |
| F2_2-C2_2-F3_2 | 107.7(6) | F1_4-C2_4-C1_4 | 112.5(8)  |
| F2_2-C2_2-F1_2 | 108.9(6) | F6_4-C3_4-F5_4 | 106.0(10) |
| F3_2-C2_2-F1_2 | 106.7(5) | F6_4-C3_4-F4_4 | 107.0(11) |
| F2_2-C2_2-C1_2 | 114.1(5) | F5_4-C3_4-F4_4 | 106.8(8)  |
| F3_2-C2_2-C1_2 | 111.0(5) | F6_4-C3_4-C1_4 | 115.0(10) |

|                   |           |                  |           |
|-------------------|-----------|------------------|-----------|
| F5_4-C3_4-C1_4    | 111.8(7)  | H10A_5-C10_5-    | 109.5     |
| F4_4-C3_4-C1_4    | 109.7(8)  | H10C_5           |           |
| F9_4-C4_4-F7_4    | 109.6(8)  | H10B_5-C10_5-    | 109.5     |
| F9_4-C4_4-F8_4    | 106.3(6)  | H10C_5           |           |
| F7_4-C4_4-F8_4    | 108.5(7)  | C5_6-C1_6-C2_6   | 108.3(3)  |
| F9_4-C4_4-C1_4    | 111.3(6)  | C5_6-C1_6-C10_6  | 124.5(3)  |
| F7_4-C4_4-C1_4    | 109.2(7)  | C2_6-C1_6-C10_6  | 127.0(3)  |
| F8_4-C4_4-C1_4    | 111.8(7)  | C5_6-C1_6-Al3    | 71.99(18) |
| C2_5-C1_5-C5_5    | 107.3(3)  | C2_6-C1_6-Al3    | 73.83(18) |
| C2_5-C1_5-C10_5   | 125.1(3)  | C10_6-C1_6-Al3   | 123.3(2)  |
| C5_5-C1_5-C10_5   | 127.2(3)  | C1_6-C2_6-C3_6   | 107.5(3)  |
| C2_5-C1_5-Ga1     | 78.22(18) | C1_6-C2_6-C9_6   | 125.2(3)  |
| C5_5-C1_5-Ga1     | 83.2(2)   | C3_6-C2_6-C9_6   | 127.0(3)  |
| C10_5-C1_5-Ga1    | 111.1(2)  | C1_6-C2_6-Al3    | 70.84(18) |
| C3_5-C2_5-C1_5    | 107.9(3)  | C3_6-C2_6-Al3    | 73.32(18) |
| C3_5-C2_5-C9_5    | 124.9(3)  | C9_6-C2_6-Al3    | 125.3(2)  |
| C1_5-C2_5-C9_5    | 126.7(3)  | C4_6-C3_6-C2_6   | 108.3(3)  |
| C4_5-C3_5-C2_5    | 108.3(3)  | C4_6-C3_6-C8_6   | 126.0(3)  |
| C4_5-C3_5-C8_5    | 126.1(3)  | C2_6-C3_6-C8_6   | 125.4(3)  |
| C2_5-C3_5-C8_5    | 125.5(3)  | C4_6-C3_6-Al3    | 71.45(17) |
| C3_5-C4_5-C5_5    | 108.3(3)  | C2_6-C3_6-Al3    | 71.68(17) |
| C3_5-C4_5-C7_5    | 126.2(3)  | C8_6-C3_6-Al3    | 127.9(2)  |
| C5_5-C4_5-C7_5    | 125.4(3)  | C3_6-C4_6-C5_6   | 107.7(3)  |
| C4_5-C5_5-C1_5    | 108.1(3)  | C3_6-C4_6-C7_6   | 126.4(3)  |
| C4_5-C5_5-C6_5    | 125.0(3)  | C5_6-C4_6-C7_6   | 125.9(3)  |
| C1_5-C5_5-C6_5    | 126.7(3)  | C3_6-C4_6-Al3    | 73.59(17) |
| C5_5-C6_5-H6A_5   | 109.5     | C5_6-C4_6-Al3    | 70.80(17) |
| C5_5-C6_5-H6B_5   | 109.5     | C7_6-C4_6-Al3    | 123.6(2)  |
| H6A_5-C6_5-H6B_5  | 109.5     | C1_6-C5_6-C4_6   | 108.2(3)  |
| C5_5-C6_5-H6C_5   | 109.5     | C1_6-C5_6-C6_6   | 124.7(3)  |
| H6A_5-C6_5-H6C_5  | 109.5     | C4_6-C5_6-C6_6   | 127.0(3)  |
| H6B_5-C6_5-H6C_5  | 109.5     | C1_6-C5_6-Al3    | 72.43(18) |
| C4_5-C7_5-H7A_5   | 109.5     | C4_6-C5_6-Al3    | 73.72(18) |
| C4_5-C7_5-H7B_5   | 109.5     | C6_6-C5_6-Al3    | 121.5(2)  |
| H7A_5-C7_5-H7B_5  | 109.5     | C5_6-C6_6-H6A_6  | 109.5     |
| C4_5-C7_5-H7C_5   | 109.5     | C5_6-C6_6-H6B_6  | 109.5     |
| H7A_5-C7_5-H7C_5  | 109.5     | H6A_6-C6_6-H6B_6 | 109.5     |
| H7B_5-C7_5-H7C_5  | 109.5     | C5_6-C6_6-H6C_6  | 109.5     |
| C3_5-C8_5-H8A_5   | 109.5     | H6A_6-C6_6-H6C_6 | 109.5     |
| C3_5-C8_5-H8B_5   | 109.5     | H6B_6-C6_6-H6C_6 | 109.5     |
| H8A_5-C8_5-H8B_5  | 109.5     | C4_6-C7_6-H7A_6  | 109.5     |
| C3_5-C8_5-H8C_5   | 109.5     | C4_6-C7_6-H7B_6  | 109.5     |
| H8A_5-C8_5-H8C_5  | 109.5     | H7A_6-C7_6-H7B_6 | 109.5     |
| H8B_5-C8_5-H8C_5  | 109.5     | C4_6-C7_6-H7C_6  | 109.5     |
| C2_5-C9_5-H9A_5   | 109.5     | H7A_6-C7_6-H7C_6 | 109.5     |
| C2_5-C9_5-H9B_5   | 109.5     | H7B_6-C7_6-H7C_6 | 109.5     |
| H9A_5-C9_5-H9B_5  | 109.5     | C3_6-C8_6-H8A_6  | 109.5     |
| C2_5-C9_5-H9C_5   | 109.5     | C3_6-C8_6-H8B_6  | 109.5     |
| H9A_5-C9_5-H9C_5  | 109.5     | H8A_6-C8_6-H8B_6 | 109.5     |
| H9B_5-C9_5-H9C_5  | 109.5     | C3_6-C8_6-H8C_6  | 109.5     |
| C1_5-C10_5-H10A_5 | 109.5     | H8A_6-C8_6-H8C_6 | 109.5     |
| C1_5-C10_5-H10B_5 | 109.5     | H8B_6-C8_6-H8C_6 | 109.5     |
| H10A_5-C10_5-     | 109.5     | C2_6-C9_6-H9A_6  | 109.5     |
| H10B_5            |           | C2_6-C9_6-H9B_6  | 109.5     |
| C1_5-C10_5-H10C_5 | 109.5     | H9A_6-C9_6-H9B_6 | 109.5     |

|                   |          |                   |           |
|-------------------|----------|-------------------|-----------|
| C2_6-C9_6-H9C_6   | 109.5    | C3_7-C8_7-H8B_7   | 109.5     |
| H9A_6-C9_6-H9C_6  | 109.5    | H8A_7-C8_7-H8B_7  | 109.5     |
| H9B_6-C9_6-H9C_6  | 109.5    | C3_7-C8_7-H8C_7   | 109.5     |
| C1_6-C10_6-H10A_6 | 109.5    | H8A_7-C8_7-H8C_7  | 109.5     |
| C1_6-C10_6-H10B_6 | 109.5    | H8B_7-C8_7-H8C_7  | 109.5     |
| H10A_6-C10_6-     | 109.5    | C2_7-C9_7-H9A_7   | 109.5     |
| H10B_6            | 109.5    | C2_7-C9_7-H9B_7   | 109.5     |
| C1_6-C10_6-H10C_6 | 109.5    | H9A_7-C9_7-H9B_7  | 109.5     |
| H10A_6-C10_6-     | 109.5    | C2_7-C9_7-H9C_7   | 109.5     |
| H10C_6            | 109.5    | H9A_7-C9_7-H9C_7  | 109.5     |
| H10B_6-C10_6-     | 109.5    | H9B_7-C9_7-H9C_7  | 109.5     |
| H10C_6            | 109.5    | C1_7-C10_7-H10A_7 | 109.5     |
| C2_7-C1_7-C5_7    | 107.3(4) | C1_7-C10_7-H10B_7 | 109.5     |
| C2_7-C1_7-C10_7   | 125.5(5) | H10A_7-C10_7-     | 109.5     |
| C5_7-C1_7-C10_7   | 127.1(5) | H10B_7            | 109.5     |
| C2_7-C1_7-AI2     | 71.0(2)  | C1_7-C10_7-H10C_7 | 109.5     |
| C5_7-C1_7-AI2     | 69.6(2)  | H10A_7-C10_7-     | 109.5     |
| C10_7-C1_7-AI2    | 128.2(3) | H10C_7            | 109.5     |
| C1_7-C2_7-C3_7    | 109.4(4) | H10B_7-C10_7-     | 109.5     |
| C1_7-C2_7-C9_7    | 125.5(5) | H10C_7            | 109.5     |
| C3_7-C2_7-C9_7    | 124.7(5) | C1_8-O1_8-AI4     | 152.7(11) |
| C1_7-C2_7-AI2     | 74.7(2)  | O1_8-C1_8-C4_8    | 111.8(8)  |
| C3_7-C2_7-AI2     | 68.9(2)  | O1_8-C1_8-C2_8    | 110.0(10) |
| C9_7-C2_7-AI2     | 128.2(3) | C4_8-C1_8-C2_8    | 108.9(8)  |
| C2_7-C3_7-C4_7    | 107.2(4) | O1_8-C1_8-C3_8    | 110.5(9)  |
| C2_7-C3_7-C8_7    | 125.4(5) | C4_8-C1_8-C3_8    | 108.6(7)  |
| C4_7-C3_7-C8_7    | 127.3(5) | C2_8-C1_8-C3_8    | 107.0(7)  |
| C2_7-C3_7-AI2     | 75.3(3)  | F1_8-C2_8-F3_8    | 106.4(11) |
| C4_7-C3_7-AI2     | 70.8(3)  | F1_8-C2_8-F2_8    | 108.6(11) |
| C8_7-C3_7-AI2     | 122.0(3) | F3_8-C2_8-F2_8    | 110.5(12) |
| C5_7-C4_7-C3_7    | 107.3(4) | F1_8-C2_8-C1_8    | 111.0(8)  |
| C5_7-C4_7-C7_7    | 125.0(5) | F3_8-C2_8-C1_8    | 110.2(11) |
| C3_7-C4_7-C7_7    | 127.7(5) | F2_8-C2_8-C1_8    | 110.1(10) |
| C5_7-C4_7-AI2     | 74.8(3)  | F6_8-C3_8-F4_8    | 107.4(9)  |
| C3_7-C4_7-AI2     | 72.3(3)  | F6_8-C3_8-F5_8    | 107.9(8)  |
| C7_7-C4_7-AI2     | 119.5(4) | F4_8-C3_8-F5_8    | 107.4(9)  |
| C1_7-C5_7-C4_7    | 108.9(4) | F6_8-C3_8-C1_8    | 112.3(8)  |
| C1_7-C5_7-C6_7    | 124.3(5) | F4_8-C3_8-C1_8    | 111.1(8)  |
| C4_7-C5_7-C6_7    | 126.7(5) | F5_8-C3_8-C1_8    | 110.5(8)  |
| C1_7-C5_7-AI2     | 75.5(3)  | F8_8-C4_8-F7_8    | 107.9(11) |
| C4_7-C5_7-AI2     | 69.1(3)  | F8_8-C4_8-F9_8    | 109.0(8)  |
| C6_7-C5_7-AI2     | 124.8(4) | F7_8-C4_8-F9_8    | 105.9(10) |
| C5_7-C6_7-H6A_7   | 109.5    | F8_8-C4_8-C1_8    | 114.5(7)  |
| C5_7-C6_7-H6B_7   | 109.5    | F7_8-C4_8-C1_8    | 109.1(9)  |
| H6A_7-C6_7-H6B_7  | 109.5    | F9_8-C4_8-C1_8    | 110.1(8)  |
| C5_7-C6_7-H6C_7   | 109.5    | C1_9-O1_9-AI4     | 148.6(11) |
| H6A_7-C6_7-H6C_7  | 109.5    | O1_9-C1_9-C4_9    | 112.7(11) |
| H6B_7-C6_7-H6C_7  | 109.5    | O1_9-C1_9-C3_9    | 106.0(10) |
| C4_7-C7_7-H7A_7   | 109.5    | C4_9-C1_9-C3_9    | 114.2(11) |
| C4_7-C7_7-H7B_7   | 109.5    | O1_9-C1_9-C2_9    | 103.8(11) |
| H7A_7-C7_7-H7B_7  | 109.5    | C4_9-C1_9-C2_9    | 108.4(11) |
| C4_7-C7_7-H7C_7   | 109.5    | C3_9-C1_9-C2_9    | 111.2(11) |
| H7A_7-C7_7-H7C_7  | 109.5    | F1_9-C2_9-F2_9    | 116.9(16) |
| H7B_7-C7_7-H7C_7  | 109.5    | F1_9-C2_9-F3_9    | 104.6(15) |
| C3_7-C8_7-H8A_7   | 109.5    | F2_9-C2_9-F3_9    | 104.7(14) |

|                   |           |                    |           |
|-------------------|-----------|--------------------|-----------|
| F1_9-C2_9-C1_9    | 106.3(14) | C5_11-C6_11-C1_11  | 120.8(12) |
| F2_9-C2_9-C1_9    | 113.4(13) | C5_11-C6_11-H6_11  | 119.6     |
| F3_9-C2_9-C1_9    | 110.5(12) | C1_11-C6_11-H6_11  | 119.6     |
| F6_9-C3_9-F5_9    | 113.5(15) | C5_10-C1_10-C2_10  | 108.1(11) |
| F6_9-C3_9-F4_9    | 104.5(15) | C5_10-C1_10-C10_10 | 127.3(15) |
| F5_9-C3_9-F4_9    | 104.0(15) | C2_10-C1_10-C10_10 | 124.6(15) |
| F6_9-C3_9-C1_9    | 116.0(14) | C5_10-C1_10-AI2    | 72.5(10)  |
| F5_9-C3_9-C1_9    | 108.4(12) | C2_10-C1_10-AI2    | 70.3(7)   |
| F4_9-C3_9-C1_9    | 109.7(12) | C10_10-C1_10-AI2   | 124.1(11) |
| F8_9-C4_9-F7_9    | 110.0(15) | C1_10-C2_10-C3_10  | 108.3(11) |
| F8_9-C4_9-F9_9    | 107.6(14) | C1_10-C2_10-C9_10  | 126.3(16) |
| F7_9-C4_9-F9_9    | 95.6(14)  | C3_10-C2_10-C9_10  | 125.1(16) |
| F8_9-C4_9-C1_9    | 112.7(13) | C1_10-C2_10-AI2    | 76.6(7)   |
| F7_9-C4_9-C1_9    | 114.5(12) | C3_10-C2_10-AI2    | 70.2(7)   |
| F9_9-C4_9-C1_9    | 115.0(13) | C9_10-C2_10-AI2    | 123.0(13) |
| C1_12-O1_12-AI4   | 147.1(13) | C4_10-C3_10-C2_10  | 107.9(11) |
| O1_12-C1_12-C3_12 | 113.8(13) | C4_10-C3_10-C8_10  | 128.2(16) |
| O1_12-C1_12-C4_12 | 108.9(11) | C2_10-C3_10-C8_10  | 124.0(16) |
| C3_12-C1_12-C4_12 | 109.1(11) | C4_10-C3_10-AI2    | 73.7(14)  |
| O1_12-C1_12-C2_12 | 108.9(12) | C2_10-C3_10-AI2    | 75.7(7)   |
| C3_12-C1_12-C2_12 | 108.5(11) | C8_10-C3_10-AI2    | 117.3(13) |
| C4_12-C1_12-C2_12 | 107.4(11) | C3_10-C4_10-C5_10  | 108.0(11) |
| F1_12-C2_12-F3_12 | 109.0(15) | C3_10-C4_10-C7_10  | 127.7(16) |
| F1_12-C2_12-F2_12 | 110.9(15) | C5_10-C4_10-C7_10  | 124.2(16) |
| F3_12-C2_12-F2_12 | 107.9(14) | C3_10-C4_10-AI2    | 71.9(13)  |
| F1_12-C2_12-C1_12 | 109.8(13) | C5_10-C4_10-AI2    | 76.8(14)  |
| F3_12-C2_12-C1_12 | 108.8(12) | C7_10-C4_10-AI2    | 119.5(19) |
| F2_12-C2_12-C1_12 | 110.3(13) | C1_10-C5_10-C4_10  | 107.7(11) |
| F4_12-C3_12-F6_12 | 107.2(15) | C1_10-C5_10-C6_10  | 124.9(16) |
| F4_12-C3_12-F5_12 | 107.3(16) | C4_10-C5_10-C6_10  | 127.3(16) |
| F6_12-C3_12-F5_12 | 106.1(16) | C1_10-C5_10-AI2    | 74.8(10)  |
| F4_12-C3_12-C1_12 | 112.2(15) | C4_10-C5_10-AI2    | 69.3(14)  |
| F6_12-C3_12-C1_12 | 112.2(14) | C6_10-C5_10-AI2    | 124.8(16) |
| F5_12-C3_12-C1_12 | 111.4(15) | C5_10-C6_10-H6A_10 | 109.5     |
| F8_12-C4_12-F9_12 | 109.0(14) | C5_10-C6_10-H6B_10 | 109.5     |
| F8_12-C4_12-F7_12 | 108.4(14) | H6A_10-C6_10-      | 109.5     |
| F9_12-C4_12-F7_12 | 107.2(14) | H6B_10             | 109.5     |
| F8_12-C4_12-C1_12 | 112.0(13) | C5_10-C6_10-H6C_10 | 109.5     |
| F9_12-C4_12-C1_12 | 109.6(12) | H6A_10-C6_10-      | 109.5     |
| F7_12-C4_12-C1_12 | 110.4(12) | H6C_10             | 109.5     |
| F1_11-C1_11-C6_11 | 120.0(12) | H6B_10-C6_10-      | 109.5     |
| F1_11-C1_11-C2_11 | 118.7(13) | H6C_10             | 109.5     |
| C6_11-C1_11-C2_11 | 121.3(12) | C4_10-C7_10-H7A_10 | 109.5     |
| C3_11-C2_11-C1_11 | 117.3(12) | C4_10-C7_10-H7B_10 | 109.5     |
| C3_11-C2_11-H2_11 | 121.4     | H7A_10-C7_10-      | 109.5     |
| C1_11-C2_11-H2_11 | 121.4     | H7B_10             | 109.5     |
| C2_11-C3_11-C4_11 | 122.6(13) | C4_10-C7_10-H7C_10 | 109.5     |
| C2_11-C3_11-H3_11 | 118.7     | H7A_10-C7_10-      | 109.5     |
| C4_11-C3_11-H3_11 | 118.7     | H7C_10             | 109.5     |
| C3_11-C4_11-C5_11 | 118.2(13) | H7B_10-C7_10-      | 109.5     |
| C3_11-C4_11-H4_11 | 120.9     | H7C_10             | 109.5     |
| C5_11-C4_11-H4_11 | 120.9     | C3_10-C8_10-H8A_10 | 109.5     |
| C6_11-C5_11-C4_11 | 119.8(13) | C3_10-C8_10-H8B_10 | 109.5     |
| C6_11-C5_11-H5_11 | 120.1     | H8A_10-C8_10-      | 109.5     |
| C4_11-C5_11-H5_11 | 120.1     | H8B_10             | 109.5     |

|                            |           |
|----------------------------|-----------|
| C3_10-C8_10-H8C_10         | 109.5     |
| H8A_10-C8_10-<br>H8C_10    | 109.5     |
| H8B_10-C8_10-<br>H8C_10    | 109.5     |
| C2_10-C9_10-H9A_10         | 109.5     |
| C2_10-C9_10-H9B_10         | 109.5     |
| H9A_10-C9_10-<br>H9B_10    | 109.5     |
| C2_10-C9_10-H9C_10         | 109.5     |
| H9A_10-C9_10-<br>H9C_10    | 109.5     |
| H9B_10-C9_10-<br>H9C_10    | 109.5     |
| C1_10-C10_10-<br>H10A_10   | 109.5     |
| C1_10-C10_10-<br>H10B_10   | 109.5     |
| H10A_10-C10_10-<br>H10B_10 | 109.5     |
| C1_10-C10_10-<br>H10C_10   | 109.5     |
| H10A_10-C10_10-<br>H10C_10 | 109.5     |
| H10B_10-C10_10-<br>H10C_10 | 109.5     |
| C1_13-O1_13-AI4            | 151.2(9)  |
| O1_13-C1_13-C4_13          | 113.3(11) |
| O1_13-C1_13-C3_13          | 110.2(10) |
| C4_13-C1_13-C3_13          | 110.1(10) |
| O1_13-C1_13-C2_13          | 105.6(10) |
| C4_13-C1_13-C2_13          | 112.6(10) |
| C3_13-C1_13-C2_13          | 104.7(9)  |
| F2_13-C2_13-F3_13          | 105.4(12) |
| F2_13-C2_13-F1_13          | 106.9(11) |
| F3_13-C2_13-F1_13          | 107.5(12) |
| F2_13-C2_13-C1_13          | 111.2(11) |
| F3_13-C2_13-C1_13          | 113.4(11) |
| F1_13-C2_13-C1_13          | 112.1(10) |
| F5_13-C3_13-F6_13          | 107.4(18) |
| F5_13-C3_13-F4_13          | 105.5(12) |
| F6_13-C3_13-F4_13          | 108.7(18) |
| F5_13-C3_13-C1_13          | 113.7(12) |
| F6_13-C3_13-C1_13          | 111.2(17) |
| F4_13-C3_13-C1_13          | 110.0(11) |
| F9_13-C4_13-F8_13          | 103.3(14) |
| F9_13-C4_13-F7_13          | 104.2(15) |
| F8_13-C4_13-F7_13          | 99.4(13)  |
| F9_13-C4_13-C1_13          | 112.5(15) |
| F8_13-C4_13-C1_13          | 113.7(13) |
| F7_13-C4_13-C1_13          | 121.6(14) |



S-Table 13: Bond lengths and angles for **6**

| Atom-Atom | Length [Å] |           |           |
|-----------|------------|-----------|-----------|
| Ga1-N4    | 2.305(6)   | Al7-O1_7  | 1.739(6)  |
| Ga1-N3    | 2.306(5)   | Al7-O1_14 | 1.88(3)   |
| Ga1-N1    | 2.350(7)   | Al8-O1_9  | 1.52(3)   |
| Ga1-Al1   | 2.736(2)   | Al8-O1_13 | 1.618(14) |
| Ga1-Al3   | 2.744(3)   | Al8-O1_4  | 1.685(18) |
| Ga1-Al2   | 2.759(2)   | Al8-O1_3  | 1.695(16) |
| Ga2-N2    | 2.317(6)   | Al8-O1_10 | 1.70(3)   |
| Ga2-N5    | 2.328(7)   | Al8-O1_2  | 1.703(9)  |
| Ga2-N6    | 2.343(7)   | Al8-O1_11 | 1.749(15) |
| Ga2-Al6   | 2.726(3)   | Al8-O1_1  | 1.756(7)  |
| Ga2-Al5   | 2.728(2)   | Al8-O1_21 | 1.80(2)   |
| Ga2-Al4   | 2.759(3)   | N1-C1     | 1.448(10) |
| Al1-C2_16 | 2.309(6)   | N1-C2     | 1.474(10) |
| Al1-C3_16 | 2.338(6)   | N1-C9     | 1.486(10) |
| Al1-C1_16 | 2.365(6)   | N2-C13    | 1.475(11) |
| Al1-C4_16 | 2.411(7)   | N2-C17    | 1.482(9)  |
| Al1-C5_16 | 2.421(7)   | N2-C12    | 1.489(11) |
| Al1-Al3   | 2.765(3)   | C1-H1A    | 0.9800    |
| Al1-Al2   | 2.783(3)   | C1-H1B    | 0.9800    |
| Al2-C5_15 | 2.316(8)   | C1-H1C    | 0.9800    |
| Al2-C4_15 | 2.317(7)   | C2-C3     | 1.524(11) |
| Al2-C3_15 | 2.332(7)   | C2-H2A    | 0.9900    |
| Al2-C2_15 | 2.367(7)   | C2-H2B    | 0.9900    |
| Al2-C1_15 | 2.368(8)   | N3-C3     | 1.453(10) |
| Al2-Al3   | 2.823(3)   | N3-C5     | 1.475(8)  |
| Al3-C3_17 | 2.288(8)   | N3-C4     | 1.484(10) |
| Al3-C4_17 | 2.321(8)   | N4-C6     | 1.466(10) |
| Al3-C2_17 | 2.325(7)   | N4-C8     | 1.482(10) |
| Al3-C5_17 | 2.393(8)   | N4-C7     | 1.485(10) |
| Al3-C1_17 | 2.399(7)   | N5-C10    | 1.471(11) |
| Al4-C1_18 | 2.280(7)   | N5-C11    | 1.476(10) |
| Al4-C5_18 | 2.315(8)   | N5-C18    | 1.495(12) |
| Al4-C2_18 | 2.325(6)   | N6-C15    | 1.452(11) |
| Al4-C4_18 | 2.363(8)   | N6-C14    | 1.464(10) |
| Al4-C3_18 | 2.367(7)   | N6-C16    | 1.491(11) |
| Al4-Al5   | 2.788(3)   | C3-H3A    | 0.9900    |
| Al4-Al6   | 2.833(3)   | C3-H3B    | 0.9900    |
| Al5-C2_19 | 2.325(6)   | C4-C6     | 1.531(12) |
| Al5-C1_19 | 2.338(7)   | C4-H4A    | 0.9900    |
| Al5-C3_19 | 2.380(6)   | C4-H4B    | 0.9900    |
| Al5-C5_19 | 2.396(6)   | C5-H5A    | 0.9800    |
| Al5-C4_19 | 2.424(7)   | C5-H5B    | 0.9800    |
| Al5-Al6   | 2.769(3)   | C5-H5C    | 0.9800    |
| Al6-C1_20 | 2.286(7)   | C6-H6A    | 0.9900    |
| Al6-C2_20 | 2.293(7)   | C6-H6B    | 0.9900    |
| Al6-C5_20 | 2.328(8)   | C7-H7A    | 0.9800    |
| Al6-C3_20 | 2.378(7)   | C7-H7B    | 0.9800    |
| Al6-C4_20 | 2.400(9)   | C7-H7C    | 0.9800    |
| Al7-O1_8  | 1.710(5)   | C8-C9     | 1.500(12) |
| Al7-O1_6  | 1.719(12)  | C8-H8A    | 0.9900    |
| Al7-O1_5  | 1.722(5)   | C8-H8B    | 0.9900    |
| Al7-O1_12 | 1.73(3)    | C9-H9A    | 0.9900    |
|           |            | C9-H9B    | 0.9900    |
|           |            | C10-H10A  | 0.9800    |
|           |            | C10-H10B  | 0.9800    |

|           |           |           |           |
|-----------|-----------|-----------|-----------|
| C10-H10C  | 0.9800    | C3_3-F4_3 | 1.328(12) |
| C11-C12   | 1.517(13) | C3_3-F5_3 | 1.334(12) |
| C11-H11A  | 0.9900    | C3_3-F6_3 | 1.345(12) |
| C11-H11B  | 0.9900    | C4_3-F8_3 | 1.301(12) |
| C12-H12A  | 0.9900    | C4_3-F7_3 | 1.323(12) |
| C12-H12B  | 0.9900    | C4_3-F9_3 | 1.338(12) |
| C13-C14   | 1.513(12) | O1_4-C1_4 | 1.368(12) |
| C13-H13A  | 0.9900    | C1_4-C3_4 | 1.546(12) |
| C13-H13B  | 0.9900    | C1_4-C2_4 | 1.549(12) |
| C14-H14A  | 0.9900    | C1_4-C4_4 | 1.555(12) |
| C14-H14B  | 0.9900    | C2_4-F3_4 | 1.319(13) |
| C15-H15A  | 0.9800    | C2_4-F2_4 | 1.329(12) |
| C15-H15B  | 0.9800    | C2_4-F1_4 | 1.345(13) |
| C15-H15C  | 0.9800    | C3_4-F4_4 | 1.326(12) |
| C16-C18   | 1.487(13) | C3_4-F6_4 | 1.339(12) |
| C16-H16A  | 0.9900    | C3_4-F5_4 | 1.339(13) |
| C16-H16B  | 0.9900    | C4_4-F9_4 | 1.333(13) |
| C17-H17A  | 0.9800    | C4_4-F8_4 | 1.336(12) |
| C17-H17B  | 0.9800    | C4_4-F7_4 | 1.345(13) |
| C17-H17C  | 0.9800    | O1_5-C1_5 | 1.345(7)  |
| C18-H18A  | 0.9900    | C1_5-C3_5 | 1.532(8)  |
| C18-H18B  | 0.9900    | C1_5-C4_5 | 1.558(9)  |
| O1_1-C1_1 | 1.352(9)  | C1_5-C2_5 | 1.566(9)  |
| C1_1-C3_1 | 1.540(10) | C2_5-F1_5 | 1.316(8)  |
| C1_1-C2_1 | 1.558(9)  | C2_5-F2_5 | 1.326(8)  |
| C1_1-C4_1 | 1.568(9)  | C2_5-F3_5 | 1.346(9)  |
| C2_1-F1_1 | 1.313(9)  | C3_5-F6_5 | 1.317(8)  |
| C2_1-F3_1 | 1.325(9)  | C3_5-F4_5 | 1.332(8)  |
| C2_1-F2_1 | 1.340(9)  | C3_5-F5_5 | 1.350(9)  |
| C3_1-F6_1 | 1.324(9)  | C4_5-F9_5 | 1.304(9)  |
| C3_1-F5_1 | 1.328(9)  | C4_5-F7_5 | 1.345(9)  |
| C3_1-F4_1 | 1.330(9)  | C4_5-F8_5 | 1.355(8)  |
| C4_1-F9_1 | 1.318(9)  | O1_6-C1_6 | 1.340(10) |
| C4_1-F8_1 | 1.319(9)  | C1_6-C4_6 | 1.544(11) |
| C4_1-F7_1 | 1.325(10) | C1_6-C2_6 | 1.551(11) |
| O1_2-C1_2 | 1.373(11) | C1_6-C3_6 | 1.565(11) |
| C1_2-C4_2 | 1.526(12) | C2_6-F1_6 | 1.320(11) |
| C1_2-C3_2 | 1.542(12) | C2_6-F3_6 | 1.338(11) |
| C1_2-C2_2 | 1.556(12) | C2_6-F2_6 | 1.344(11) |
| C2_2-F2_2 | 1.327(12) | C3_6-F6_6 | 1.319(11) |
| C2_2-F1_2 | 1.327(12) | C3_6-F4_6 | 1.334(11) |
| C2_2-F3_2 | 1.335(12) | C3_6-F5_6 | 1.345(11) |
| C3_2-F5_2 | 1.318(12) | C4_6-F8_6 | 1.338(11) |
| C3_2-F4_2 | 1.333(12) | C4_6-F9_6 | 1.339(11) |
| C3_2-F6_2 | 1.335(11) | C4_6-F7_6 | 1.349(11) |
| C4_2-F9_2 | 1.322(12) | O1_7-C1_7 | 1.367(7)  |
| C4_2-F8_2 | 1.323(12) | C1_7-C4_7 | 1.539(9)  |
| C4_2-F7_2 | 1.349(12) | C1_7-C2_7 | 1.540(9)  |
| O1_3-C1_3 | 1.333(12) | C1_7-C3_7 | 1.560(9)  |
| C1_3-C3_3 | 1.532(11) | C2_7-F1_7 | 1.324(8)  |
| C1_3-C2_3 | 1.544(12) | C2_7-F2_7 | 1.335(8)  |
| C1_3-C4_3 | 1.572(12) | C2_7-F3_7 | 1.340(9)  |
| C2_3-F2_3 | 1.313(12) | C3_7-F4_7 | 1.331(8)  |
| C2_3-F3_3 | 1.323(12) | C3_7-F6_7 | 1.337(8)  |
| C2_3-F1_3 | 1.331(12) | C3_7-F5_7 | 1.337(9)  |

|             |           |                |           |
|-------------|-----------|----------------|-----------|
| C4_7-F7_7   | 1.338(9)  | O1_12-C1_12    | 1.350(14) |
| C4_7-F9_7   | 1.340(9)  | C1_12-C2_12    | 1.553(13) |
| C4_7-F8_7   | 1.352(8)  | C1_12-C3_12    | 1.554(13) |
| O1_8-C1_8   | 1.358(8)  | C1_12-C4_12    | 1.556(13) |
| C1_8-C4_8   | 1.542(8)  | C2_12-F3_12    | 1.328(14) |
| C1_8-C2_8   | 1.545(8)  | C2_12-F1_12    | 1.338(14) |
| C1_8-C3_8   | 1.568(8)  | C2_12-F2_12    | 1.340(14) |
| C2_8-F3_8   | 1.318(8)  | C3_12-F6_12    | 1.326(14) |
| C2_8-F1_8   | 1.328(8)  | C3_12-F4_12    | 1.329(14) |
| C2_8-F2_8   | 1.355(8)  | C3_12-F5_12    | 1.340(14) |
| C3_8-F6_8   | 1.308(8)  | C4_12-F7_12    | 1.318(14) |
| C3_8-F4_8   | 1.330(7)  | C4_12-F8_12    | 1.327(14) |
| C3_8-F5_8   | 1.344(8)  | C4_12-F9_12    | 1.344(14) |
| C4_8-F9_8   | 1.325(8)  | O1_14-C1_14    | 1.360(15) |
| C4_8-F8_8   | 1.330(8)  | C1_14-C2_14    | 1.543(13) |
| C4_8-F7_8   | 1.342(7)  | C1_14-C3_14    | 1.551(13) |
| O1_9-C1_9   | 1.366(14) | C1_14-C4_14    | 1.553(13) |
| C1_9-C3_9   | 1.542(13) | C2_14-F2_14    | 1.331(14) |
| C1_9-C4_9   | 1.547(13) | C2_14-F1_14    | 1.335(14) |
| C1_9-C2_9   | 1.556(13) | C2_14-F3_14    | 1.339(14) |
| C2_9-F3_9   | 1.328(14) | C3_14-F5_14    | 1.327(14) |
| C2_9-F2_9   | 1.329(14) | C3_14-F4_14    | 1.329(14) |
| C2_9-F1_9   | 1.339(14) | C3_14-F6_14    | 1.338(14) |
| C3_9-F5_9   | 1.330(14) | C4_14-F8_14    | 1.324(14) |
| C3_9-F4_9   | 1.335(14) | C4_14-F7_14    | 1.325(14) |
| C3_9-F6_9   | 1.343(14) | C4_14-F9_14    | 1.339(14) |
| C4_9-F9_9   | 1.327(14) | C1_15-C5_15    | 1.409(9)  |
| C4_9-F7_9   | 1.329(14) | C1_15-C2_15    | 1.416(8)  |
| C4_9-F8_9   | 1.329(14) | C1_15-C10_15   | 1.510(9)  |
| O1_11-C1_11 | 1.340(12) | C2_15-C3_15    | 1.421(9)  |
| C1_11-C4_11 | 1.536(12) | C2_15-C9_15    | 1.502(9)  |
| C1_11-C3_11 | 1.547(12) | C3_15-C4_15    | 1.422(8)  |
| C1_11-C2_11 | 1.555(12) | C3_15-C8_15    | 1.500(8)  |
| C2_11-F1_11 | 1.305(12) | C4_15-C5_15    | 1.434(8)  |
| C2_11-F2_11 | 1.322(12) | C4_15-C7_15    | 1.484(9)  |
| C2_11-F3_11 | 1.323(12) | C5_15-C6_15    | 1.500(8)  |
| C3_11-F4_11 | 1.320(12) | C6_15-H6A_15   | 0.9800    |
| C3_11-F6_11 | 1.322(12) | C6_15-H6B_15   | 0.9800    |
| C3_11-F5_11 | 1.326(12) | C6_15-H6C_15   | 0.9800    |
| C4_11-F8_11 | 1.325(12) | C7_15-H7A_15   | 0.9800    |
| C4_11-F9_11 | 1.325(12) | C7_15-H7B_15   | 0.9800    |
| C4_11-F7_11 | 1.354(13) | C7_15-H7C_15   | 0.9800    |
| O1_13-C1_13 | 1.350(13) | C8_15-H8A_15   | 0.9800    |
| C1_13-C4_13 | 1.537(12) | C8_15-H8B_15   | 0.9800    |
| C1_13-C3_13 | 1.539(12) | C8_15-H8C_15   | 0.9800    |
| C1_13-C2_13 | 1.561(13) | C9_15-H9A_15   | 0.9800    |
| C2_13-F2_13 | 1.319(13) | C9_15-H9B_15   | 0.9800    |
| C2_13-F1_13 | 1.338(13) | C9_15-H9C_15   | 0.9800    |
| C2_13-F3_13 | 1.339(13) | C10_15-H10A_15 | 0.9800    |
| C3_13-F5_13 | 1.329(13) | C10_15-H10B_15 | 0.9800    |
| C3_13-F4_13 | 1.338(13) | C10_15-H10C_15 | 0.9800    |
| C3_13-F6_13 | 1.339(13) | C1_16-C5_16    | 1.419(8)  |
| C4_13-F9_13 | 1.330(13) | C1_16-C2_16    | 1.422(8)  |
| C4_13-F7_13 | 1.334(13) | C1_16-C10_16   | 1.510(8)  |
| C4_13-F8_13 | 1.348(13) | C2_16-C3_16    | 1.425(8)  |

|                |          |                |          |
|----------------|----------|----------------|----------|
| C2_16-C9_16    | 1.494(9) | C5_18-C6_18    | 1.486(9) |
| C3_16-C4_16    | 1.415(9) | C6_18-H6A_18   | 0.9800   |
| C3_16-C8_16    | 1.494(8) | C6_18-H6B_18   | 0.9800   |
| C4_16-C5_16    | 1.411(8) | C6_18-H6C_18   | 0.9800   |
| C4_16-C7_16    | 1.495(9) | C7_18-H7A_18   | 0.9800   |
| C5_16-C6_16    | 1.495(9) | C7_18-H7B_18   | 0.9800   |
| C6_16-H6A_16   | 0.9800   | C7_18-H7C_18   | 0.9800   |
| C6_16-H6B_16   | 0.9800   | C8_18-H8A_18   | 0.9800   |
| C6_16-H6C_16   | 0.9800   | C8_18-H8B_18   | 0.9800   |
| C7_16-H7A_16   | 0.9800   | C8_18-H8C_18   | 0.9800   |
| C7_16-H7B_16   | 0.9800   | C9_18-H9A_18   | 0.9800   |
| C7_16-H7C_16   | 0.9800   | C9_18-H9B_18   | 0.9800   |
| C8_16-H8A_16   | 0.9800   | C9_18-H9C_18   | 0.9800   |
| C8_16-H8B_16   | 0.9800   | C10_18-H10A_18 | 0.9800   |
| C8_16-H8C_16   | 0.9800   | C10_18-H10B_18 | 0.9800   |
| C9_16-H9A_16   | 0.9800   | C10_18-H10C_18 | 0.9800   |
| C9_16-H9B_16   | 0.9800   | C1_19-C5_19    | 1.412(8) |
| C9_16-H9C_16   | 0.9800   | C1_19-C2_19    | 1.430(8) |
| C10_16-H10A_16 | 0.9800   | C1_19-C10_19   | 1.499(9) |
| C10_16-H10B_16 | 0.9800   | C2_19-C3_19    | 1.403(9) |
| C10_16-H10C_16 | 0.9800   | C2_19-C9_19    | 1.503(8) |
| C1_17-C5_17    | 1.402(9) | C3_19-C4_19    | 1.423(9) |
| C1_17-C2_17    | 1.416(8) | C3_19-C8_19    | 1.516(9) |
| C1_17-C10_17   | 1.514(9) | C4_19-C5_19    | 1.415(8) |
| C2_17-C3_17    | 1.412(8) | C4_19-C7_19    | 1.495(9) |
| C2_17-C9_17    | 1.518(8) | C5_19-C6_19    | 1.504(8) |
| C3_17-C4_17    | 1.417(9) | C6_19-H6A_19   | 0.9800   |
| C3_17-C8_17    | 1.498(8) | C6_19-H6B_19   | 0.9800   |
| C4_17-C5_17    | 1.426(9) | C6_19-H6C_19   | 0.9800   |
| C4_17-C7_17    | 1.479(9) | C7_19-H7A_19   | 0.9800   |
| C5_17-C6_17    | 1.496(9) | C7_19-H7B_19   | 0.9800   |
| C6_17-H6A_17   | 0.9800   | C7_19-H7C_19   | 0.9800   |
| C6_17-H6B_17   | 0.9800   | C8_19-H8A_19   | 0.9800   |
| C6_17-H6C_17   | 0.9800   | C8_19-H8B_19   | 0.9800   |
| C7_17-H7A_17   | 0.9800   | C8_19-H8C_19   | 0.9800   |
| C7_17-H7B_17   | 0.9800   | C9_19-H9A_19   | 0.9800   |
| C7_17-H7C_17   | 0.9800   | C9_19-H9B_19   | 0.9800   |
| C8_17-H8A_17   | 0.9800   | C9_19-H9C_19   | 0.9800   |
| C8_17-H8B_17   | 0.9800   | C10_19-H10A_19 | 0.9800   |
| C8_17-H8C_17   | 0.9800   | C10_19-H10B_19 | 0.9800   |
| C9_17-H9A_17   | 0.9800   | C10_19-H10C_19 | 0.9800   |
| C9_17-H9B_17   | 0.9800   | C1_20-C5_20    | 1.410(9) |
| C9_17-H9C_17   | 0.9800   | C1_20-C2_20    | 1.429(8) |
| C10_17-H10A_17 | 0.9800   | C1_20-C10_20   | 1.503(9) |
| C10_17-H10B_17 | 0.9800   | C2_20-C3_20    | 1.418(9) |
| C10_17-H10C_17 | 0.9800   | C2_20-C9_20    | 1.508(9) |
| C1_18-C2_18    | 1.413(8) | C3_20-C4_20    | 1.415(9) |
| C1_18-C5_18    | 1.421(9) | C3_20-C8_20    | 1.501(9) |
| C1_18-C10_18   | 1.525(9) | C4_20-C5_20    | 1.429(9) |
| C2_18-C3_18    | 1.416(8) | C4_20-C7_20    | 1.496(9) |
| C2_18-C9_18    | 1.509(8) | C5_20-C6_20    | 1.500(9) |
| C3_18-C4_18    | 1.412(9) | C6_20-H6A_20   | 0.9800   |
| C3_18-C8_18    | 1.512(9) | C6_20-H6B_20   | 0.9800   |
| C4_18-C5_18    | 1.416(9) | C6_20-H6C_20   | 0.9800   |
| C4_18-C7_18    | 1.502(9) | C7_20-H7A_20   | 0.9800   |

|                       |                  |                 |            |
|-----------------------|------------------|-----------------|------------|
| C7_20-H7B_20          | 0.9800           | N2-Ga2-N6       | 75.6(2)    |
| C7_20-H7C_20          | 0.9800           | N5-Ga2-N6       | 76.0(2)    |
| C8_20-H8A_20          | 0.9800           | N2-Ga2-Al6      | 105.92(17) |
| C8_20-H8B_20          | 0.9800           | N5-Ga2-Al6      | 173.3(2)   |
| C8_20-H8C_20          | 0.9800           | N6-Ga2-Al6      | 110.8(2)   |
| C9_20-H9A_20          | 0.9800           | N2-Ga2-Al5      | 166.30(16) |
| C9_20-H9B_20          | 0.9800           | N5-Ga2-Al5      | 116.62(18) |
| C9_20-H9C_20          | 0.9800           | N6-Ga2-Al5      | 111.87(17) |
| C10_20-H10A_20        | 0.9800           | Al6-Ga2-Al5     | 61.03(7)   |
| C10_20-H10B_20        | 0.9800           | N2-Ga2-Al4      | 110.28(18) |
| C10_20-H10C_20        | 0.9800           | N5-Ga2-Al4      | 111.1(2)   |
| O1_10-C1_10           | 1.364(14)        | N6-Ga2-Al4      | 171.49(19) |
| C1_10-C4_10           | 1.542(13)        | Al6-Ga2-Al4     | 62.19(7)   |
| C1_10-C2_10           | 1.546(13)        | Al5-Ga2-Al4     | 61.07(7)   |
| C1_10-C3_10           | 1.564(13)        | C2_16-Al1-C3_16 | 35.7(2)    |
| C2_10-F1_10           | 1.322(13)        | C2_16-Al1-C1_16 | 35.4(2)    |
| C2_10-F2_10           | 1.329(14)        | C3_16-Al1-C1_16 | 58.5(2)    |
| C2_10-F3_10           | 1.334(14)        | C2_16-Al1-C4_16 | 58.4(2)    |
| C3_10-F4_10           | 1.328(13)        | C3_16-Al1-C4_16 | 34.6(2)    |
| C3_10-F6_10           | 1.334(13)        | C1_16-Al1-C4_16 | 57.8(2)    |
| C3_10-F5_10           | 1.338(13)        | C2_16-Al1-C5_16 | 57.8(2)    |
| C4_10-F9_10           | 1.328(13)        | C3_16-Al1-C5_16 | 57.1(2)    |
| C4_10-F8_10           | 1.330(14)        | C1_16-Al1-C5_16 | 34.5(2)    |
| C4_10-F7_10           | 1.330(14)        | C4_16-Al1-C5_16 | 34.0(2)    |
| O1_21-C1_21           | 1.358(14)        | C2_16-Al1-Ga1   | 132.93(18) |
| C1_21-C2_21           | 1.541(13)        | C3_16-Al1-Ga1   | 167.97(19) |
| C1_21-C3_21           | 1.552(13)        | C1_16-Al1-Ga1   | 114.96(16) |
| C1_21-C4_21           | 1.558(13)        | C4_16-Al1-Ga1   | 153.17(19) |
| C2_21-F1_21           | 1.323(14)        | C5_16-Al1-Ga1   | 124.36(17) |
| C2_21-F2_21           | 1.332(14)        | C2_16-Al1-Al3   | 164.02(18) |
| C2_21-F3_21           | 1.340(14)        | C3_16-Al1-Al3   | 130.43(17) |
| C3_21-F4_21           | 1.327(14)        | C1_16-Al1-Al3   | 157.02(19) |
| C3_21-F5_21           | 1.334(14)        | C4_16-Al1-Al3   | 115.44(19) |
| C3_21-F6_21           | 1.343(14)        | C5_16-Al1-Al3   | 126.83(19) |
| C4_21-F8_21           | 1.299(14)        | Ga1-Al1-Al3     | 59.84(6)   |
| C4_21-F7_21           | 1.332(14)        | C2_16-Al1-Al2   | 113.98(18) |
| C4_21-F9_21           | 1.346(14)        | C3_16-Al1-Al2   | 117.02(19) |
|                       |                  | C1_16-Al1-Al2   | 138.5(2)   |
| <b>Atom-Atom-Atom</b> | <b>Angle [°]</b> | C4_16-Al1-Al2   | 144.30(19) |
| N4-Ga1-N3             | 76.2(2)          | C5_16-Al1-Al2   | 171.75(18) |
| N4-Ga1-N1             | 75.6(2)          | Ga1-Al1-Al2     | 59.96(7)   |
| N3-Ga1-N1             | 74.7(2)          | Al3-Al1-Al2     | 61.16(8)   |
| N4-Ga1-Al1            | 111.06(16)       | C5_15-Al2-C4_15 | 36.1(2)    |
| N3-Ga1-Al1            | 165.80(15)       | C5_15-Al2-C3_15 | 59.2(2)    |
| N1-Ga1-Al1            | 118.44(16)       | C4_15-Al2-C3_15 | 35.6(2)    |
| N4-Ga1-Al3            | 111.14(18)       | C5_15-Al2-C2_15 | 58.7(2)    |
| N3-Ga1-Al3            | 105.67(16)       | C4_15-Al2-C2_15 | 59.1(2)    |
| N1-Ga1-Al3            | 173.26(17)       | C3_15-Al2-C2_15 | 35.2(2)    |
| Al1-Ga1-Al3           | 60.59(7)         | C5_15-Al2-C1_15 | 35.0(2)    |
| N4-Ga1-Al2            | 170.80(17)       | C4_15-Al2-C1_15 | 58.9(2)    |
| N3-Ga1-Al2            | 110.72(16)       | C3_15-Al2-C1_15 | 58.3(2)    |
| N1-Ga1-Al2            | 111.70(17)       | C2_15-Al2-C1_15 | 34.8(2)    |
| Al1-Ga1-Al2           | 60.86(7)         | C5_15-Al2-Ga1   | 155.3(2)   |
| Al3-Ga1-Al2           | 61.72(7)         | C4_15-Al2-Ga1   | 165.69(19) |
| N2-Ga2-N5             | 75.8(2)          | C3_15-Al2-Ga1   | 132.02(19) |

|                 |            |                 |            |
|-----------------|------------|-----------------|------------|
| C2_15-AI2-Ga1   | 115.55(19) | C2_18-AI4-Ga2   | 132.65(19) |
| C1_15-AI2-Ga1   | 125.6(2)   | C4_18-AI4-Ga2   | 125.6(2)   |
| C5_15-AI2-AI1   | 114.9(2)   | C3_18-AI4-Ga2   | 116.61(19) |
| C4_15-AI2-AI1   | 131.67(19) | C1_18-AI4-AI5   | 131.06(19) |
| C3_15-AI2-AI1   | 165.7(2)   | C5_18-AI4-AI5   | 114.7(2)   |
| C2_15-AI2-AI1   | 155.7(2)   | C2_18-AI4-AI5   | 165.0(2)   |
| C1_15-AI2-AI1   | 125.65(19) | C4_18-AI4-AI5   | 125.7(2)   |
| Ga1-AI2-AI1     | 59.17(6)   | C3_18-AI4-AI5   | 156.4(2)   |
| C5_15-AI2-AI3   | 142.0(2)   | Ga2-AI4-AI5     | 58.91(7)   |
| C4_15-AI2-AI3   | 115.9(2)   | C1_18-AI4-AI6   | 116.0(2)   |
| C3_15-AI2-AI3   | 116.3(2)   | C5_18-AI4-AI6   | 142.4(2)   |
| C2_15-AI2-AI3   | 141.7(2)   | C2_18-AI4-AI6   | 116.0(2)   |
| C1_15-AI2-AI3   | 174.3(2)   | C4_18-AI4-AI6   | 174.6(2)   |
| Ga1-AI2-AI3     | 58.89(7)   | C3_18-AI4-AI6   | 141.6(2)   |
| AI1-AI2-AI3     | 59.09(8)   | Ga2-AI4-AI6     | 58.32(8)   |
| C3_17-AI3-C4_17 | 35.8(2)    | AI5-AI4-AI6     | 59.02(8)   |
| C3_17-AI3-C2_17 | 35.6(2)    | C2_19-AI5-C1_19 | 35.7(2)    |
| C4_17-AI3-C2_17 | 58.8(2)    | C2_19-AI5-C3_19 | 34.7(2)    |
| C3_17-AI3-C5_17 | 58.8(2)    | C1_19-AI5-C3_19 | 58.0(2)    |
| C4_17-AI3-C5_17 | 35.2(2)    | C2_19-AI5-C5_19 | 58.0(2)    |
| C2_17-AI3-C5_17 | 57.8(2)    | C1_19-AI5-C5_19 | 34.7(2)    |
| C3_17-AI3-C1_17 | 58.5(2)    | C3_19-AI5-C5_19 | 57.0(2)    |
| C4_17-AI3-C1_17 | 57.9(3)    | C2_19-AI5-C4_19 | 57.9(2)    |
| C2_17-AI3-C1_17 | 34.8(2)    | C1_19-AI5-C4_19 | 57.8(2)    |
| C5_17-AI3-C1_17 | 34.0(2)    | C3_19-AI5-C4_19 | 34.5(2)    |
| C3_17-AI3-Ga1   | 171.8(2)   | C5_19-AI5-C4_19 | 34.1(2)    |
| C4_17-AI3-Ga1   | 151.0(2)   | C2_19-AI5-Ga2   | 169.6(2)   |
| C2_17-AI3-Ga1   | 137.4(2)   | C1_19-AI5-Ga2   | 134.19(18) |
| C5_17-AI3-Ga1   | 124.0(2)   | C3_19-AI5-Ga2   | 151.1(2)   |
| C1_17-AI3-Ga1   | 118.57(19) | C5_19-AI5-Ga2   | 115.44(16) |
| C3_17-AI3-AI1   | 116.28(19) | C4_19-AI5-Ga2   | 122.20(19) |
| C4_17-AI3-AI1   | 145.6(2)   | C2_19-AI5-AI6   | 129.86(18) |
| C2_17-AI3-AI1   | 112.59(19) | C1_19-AI5-AI6   | 163.29(18) |
| C5_17-AI3-AI1   | 169.8(2)   | C3_19-AI5-AI6   | 115.8(2)   |
| C1_17-AI3-AI1   | 136.0(2)   | C5_19-AI5-AI6   | 158.3(2)   |
| Ga1-AI3-AI1     | 59.57(6)   | C4_19-AI5-AI6   | 127.5(2)   |
| C3_17-AI3-AI2   | 126.0(2)   | Ga2-AI5-AI6     | 59.45(7)   |
| C4_17-AI3-AI2   | 114.4(2)   | C2_19-AI5-AI4   | 118.1(2)   |
| C2_17-AI3-AI2   | 158.2(2)   | C1_19-AI5-AI4   | 114.0(2)   |
| C5_17-AI3-AI2   | 130.5(2)   | C3_19-AI5-AI4   | 146.5(2)   |
| C1_17-AI3-AI2   | 162.8(2)   | C5_19-AI5-AI4   | 137.21(19) |
| Ga1-AI3-AI2     | 59.39(7)   | C4_19-AI5-AI4   | 171.2(2)   |
| AI1-AI3-AI2     | 59.75(8)   | Ga2-AI5-AI4     | 60.02(7)   |
| C1_18-AI4-C5_18 | 36.0(2)    | AI6-AI5-AI4     | 61.30(8)   |
| C1_18-AI4-C2_18 | 35.7(2)    | C1_20-AI6-C2_20 | 36.4(2)    |
| C5_18-AI4-C2_18 | 59.3(2)    | C1_20-AI6-C5_20 | 35.6(2)    |
| C1_18-AI4-C4_18 | 59.2(3)    | C2_20-AI6-C5_20 | 59.2(2)    |
| C5_18-AI4-C4_18 | 35.2(2)    | C1_20-AI6-C3_20 | 59.3(2)    |
| C2_18-AI4-C4_18 | 58.7(2)    | C2_20-AI6-C3_20 | 35.3(2)    |
| C1_18-AI4-C3_18 | 58.7(2)    | C5_20-AI6-C3_20 | 58.1(2)    |
| C5_18-AI4-C3_18 | 58.3(2)    | C1_20-AI6-C4_20 | 59.1(3)    |
| C2_18-AI4-C3_18 | 35.1(2)    | C2_20-AI6-C4_20 | 58.6(3)    |
| C4_18-AI4-C3_18 | 34.7(2)    | C5_20-AI6-C4_20 | 35.1(2)    |
| C1_18-AI4-Ga2   | 166.3(2)   | C3_20-AI6-C4_20 | 34.4(2)    |
| C5_18-AI4-Ga2   | 155.3(2)   | C1_20-AI6-Ga2   | 170.1(2)   |

|                 |            |            |          |
|-----------------|------------|------------|----------|
| C2_20-Al6-Ga2   | 151.5(2)   | C3-C2-H2A  | 109.3    |
| C5_20-Al6-Ga2   | 135.9(2)   | N1-C2-H2B  | 109.3    |
| C3_20-Al6-Ga2   | 123.59(19) | C3-C2-H2B  | 109.3    |
| C4_20-Al6-Ga2   | 117.0(2)   | H2A-C2-H2B | 108.0    |
| C1_20-Al6-Al5   | 116.2(2)   | C3-N3-C5   | 110.2(6) |
| C2_20-Al6-Al5   | 145.1(2)   | C3-N3-C4   | 113.4(6) |
| C5_20-Al6-Al5   | 113.7(2)   | C5-N3-C4   | 108.2(6) |
| C3_20-Al6-Al5   | 171.4(2)   | C3-N3-Ga1  | 114.0(4) |
| C4_20-Al6-Al5   | 137.3(2)   | C5-N3-Ga1  | 107.6(4) |
| Ga2-Al6-Al5     | 59.52(7)   | C4-N3-Ga1  | 103.0(4) |
| C1_20-Al6-Al4   | 127.5(2)   | C6-N4-C8   | 113.7(7) |
| C2_20-Al6-Al4   | 114.3(2)   | C6-N4-C7   | 111.7(6) |
| C5_20-Al6-Al4   | 160.3(2)   | C8-N4-C7   | 109.2(6) |
| C3_20-Al6-Al4   | 128.9(2)   | C6-N4-Ga1  | 110.8(5) |
| C4_20-Al6-Al4   | 160.7(2)   | C8-N4-Ga1  | 103.5(5) |
| Ga2-Al6-Al4     | 59.48(8)   | C7-N4-Ga1  | 107.5(5) |
| Al5-Al6-Al4     | 59.68(9)   | C10-N5-C11 | 109.0(7) |
| O1_8-Al7-O1_6   | 112.7(5)   | C10-N5-C18 | 110.7(7) |
| O1_8-Al7-O1_5   | 107.2(3)   | C11-N5-C18 | 112.5(7) |
| O1_6-Al7-O1_5   | 110.8(5)   | C10-N5-Ga2 | 109.3(5) |
| O1_8-Al7-O1_7   | 109.0(3)   | C11-N5-Ga2 | 103.3(5) |
| O1_6-Al7-O1_7   | 104.7(5)   | C18-N5-Ga2 | 111.8(5) |
| O1_5-Al7-O1_7   | 112.5(3)   | C15-N6-C14 | 111.1(7) |
| O1_9-Al8-O1_13  | 123.2(15)  | C15-N6-C16 | 110.9(7) |
| O1_4-Al8-O1_3   | 106.2(11)  | C14-N6-C16 | 112.3(7) |
| O1_4-Al8-O1_2   | 108.4(9)   | C15-N6-Ga2 | 108.3(5) |
| O1_3-Al8-O1_2   | 107.7(9)   | C14-N6-Ga2 | 111.1(5) |
| O1_9-Al8-O1_11  | 98.1(15)   | C16-N6-Ga2 | 102.7(5) |
| O1_13-Al8-O1_11 | 108.5(10)  | N3-C3-C2   | 111.1(6) |
| O1_4-Al8-O1_1   | 109.0(9)   | N3-C3-H3A  | 109.4    |
| O1_3-Al8-O1_1   | 113.9(7)   | C2-C3-H3A  | 109.4    |
| O1_2-Al8-O1_1   | 111.3(6)   | N3-C3-H3B  | 109.4    |
| O1_9-Al8-O1_21  | 110.6(16)  | C2-C3-H3B  | 109.4    |
| O1_13-Al8-O1_21 | 99.7(12)   | H3A-C3-H3B | 108.0    |
| O1_11-Al8-O1_21 | 118.0(12)  | N3-C4-C6   | 109.4(6) |
| C1-N1-C2        | 110.3(7)   | N3-C4-H4A  | 109.8    |
| C1-N1-C9        | 110.7(6)   | C6-C4-H4A  | 109.8    |
| C2-N1-C9        | 112.2(7)   | N3-C4-H4B  | 109.8    |
| C1-N1-Ga1       | 108.6(5)   | C6-C4-H4B  | 109.8    |
| C2-N1-Ga1       | 103.9(5)   | H4A-C4-H4B | 108.2    |
| C9-N1-Ga1       | 111.0(5)   | N3-C5-H5A  | 109.5    |
| C13-N2-C17      | 110.9(7)   | N3-C5-H5B  | 109.5    |
| C13-N2-C12      | 114.7(7)   | H5A-C5-H5B | 109.5    |
| C17-N2-C12      | 109.0(7)   | N3-C5-H5C  | 109.5    |
| C13-N2-Ga2      | 103.2(5)   | H5A-C5-H5C | 109.5    |
| C17-N2-Ga2      | 106.7(4)   | H5B-C5-H5C | 109.5    |
| C12-N2-Ga2      | 111.9(5)   | N4-C6-C4   | 112.8(6) |
| N1-C1-H1A       | 109.5      | N4-C6-H6A  | 109.0    |
| N1-C1-H1B       | 109.5      | C4-C6-H6A  | 109.0    |
| H1A-C1-H1B      | 109.5      | N4-C6-H6B  | 109.0    |
| N1-C1-H1C       | 109.5      | C4-C6-H6B  | 109.0    |
| H1A-C1-H1C      | 109.5      | H6A-C6-H6B | 107.8    |
| H1B-C1-H1C      | 109.5      | N4-C7-H7A  | 109.5    |
| N1-C2-C3        | 111.5(7)   | N4-C7-H7B  | 109.5    |
| N1-C2-H2A       | 109.3      | H7A-C7-H7B | 109.5    |

|               |          |                |           |
|---------------|----------|----------------|-----------|
| N4-C7-H7C     | 109.5    | N6-C16-H16B    | 108.8     |
| H7A-C7-H7C    | 109.5    | H16A-C16-H16B  | 107.7     |
| H7B-C7-H7C    | 109.5    | N2-C17-H17A    | 109.5     |
| N4-C8-C9      | 112.0(7) | N2-C17-H17B    | 109.5     |
| N4-C8-H8A     | 109.2    | H17A-C17-H17B  | 109.5     |
| C9-C8-H8A     | 109.2    | N2-C17-H17C    | 109.5     |
| N4-C8-H8B     | 109.2    | H17A-C17-H17C  | 109.5     |
| C9-C8-H8B     | 109.2    | H17B-C17-H17C  | 109.5     |
| H8A-C8-H8B    | 107.9    | C16-C18-N5     | 111.2(7)  |
| N1-C9-C8      | 110.8(7) | C16-C18-H18A   | 109.4     |
| N1-C9-H9A     | 109.5    | N5-C18-H18A    | 109.4     |
| C8-C9-H9A     | 109.5    | C16-C18-H18B   | 109.4     |
| N1-C9-H9B     | 109.5    | N5-C18-H18B    | 109.4     |
| C8-C9-H9B     | 109.5    | H18A-C18-H18B  | 108.0     |
| H9A-C9-H9B    | 108.1    | C1_1-O1_1-AI8  | 148.4(6)  |
| N5-C10-H10A   | 109.5    | O1_1-C1_1-C3_1 | 107.7(6)  |
| N5-C10-H10B   | 109.5    | O1_1-C1_1-C2_1 | 110.6(7)  |
| H10A-C10-H10B | 109.5    | C3_1-C1_1-C2_1 | 108.9(6)  |
| N5-C10-H10C   | 109.5    | O1_1-C1_1-C4_1 | 111.4(7)  |
| H10A-C10-H10C | 109.5    | C3_1-C1_1-C4_1 | 109.8(7)  |
| H10B-C10-H10C | 109.5    | C2_1-C1_1-C4_1 | 108.3(6)  |
| N5-C11-C12    | 112.4(7) | F1_1-C2_1-F3_1 | 107.9(8)  |
| N5-C11-H11A   | 109.1    | F1_1-C2_1-F2_1 | 108.0(7)  |
| C12-C11-H11A  | 109.1    | F3_1-C2_1-F2_1 | 106.5(8)  |
| N5-C11-H11B   | 109.1    | F1_1-C2_1-C1_1 | 111.6(7)  |
| C12-C11-H11B  | 109.1    | F3_1-C2_1-C1_1 | 111.2(7)  |
| H11A-C11-H11B | 107.9    | F2_1-C2_1-C1_1 | 111.4(7)  |
| N2-C12-C11    | 111.5(7) | F6_1-C3_1-F5_1 | 107.5(7)  |
| N2-C12-H12A   | 109.3    | F6_1-C3_1-F4_1 | 107.3(7)  |
| C11-C12-H12A  | 109.3    | F5_1-C3_1-F4_1 | 106.5(7)  |
| N2-C12-H12B   | 109.3    | F6_1-C3_1-C1_1 | 114.1(7)  |
| C11-C12-H12B  | 109.3    | F5_1-C3_1-C1_1 | 111.3(7)  |
| H12A-C12-H12B | 108.0    | F4_1-C3_1-C1_1 | 109.8(7)  |
| N2-C13-C14    | 112.0(7) | F9_1-C4_1-F8_1 | 109.9(8)  |
| N2-C13-H13A   | 109.2    | F9_1-C4_1-F7_1 | 107.4(8)  |
| C14-C13-H13A  | 109.2    | F8_1-C4_1-F7_1 | 106.8(8)  |
| N2-C13-H13B   | 109.2    | F9_1-C4_1-C1_1 | 110.3(7)  |
| C14-C13-H13B  | 109.2    | F8_1-C4_1-C1_1 | 111.5(7)  |
| H13A-C13-H13B | 107.9    | F7_1-C4_1-C1_1 | 110.8(7)  |
| N6-C14-C13    | 111.9(7) | C1_2-O1_2-AI8  | 149.2(9)  |
| N6-C14-H14A   | 109.2    | O1_2-C1_2-C4_2 | 114.1(11) |
| C13-C14-H14A  | 109.2    | O1_2-C1_2-C3_2 | 112.1(9)  |
| N6-C14-H14B   | 109.2    | C4_2-C1_2-C3_2 | 109.8(9)  |
| C13-C14-H14B  | 109.2    | O1_2-C1_2-C2_2 | 101.4(9)  |
| H14A-C14-H14B | 107.9    | C4_2-C1_2-C2_2 | 109.8(9)  |
| N6-C15-H15A   | 109.5    | C3_2-C1_2-C2_2 | 109.2(9)  |
| N6-C15-H15B   | 109.5    | F2_2-C2_2-F1_2 | 109.6(12) |
| H15A-C15-H15B | 109.5    | F2_2-C2_2-F3_2 | 106.3(12) |
| N6-C15-H15C   | 109.5    | F1_2-C2_2-F3_2 | 107.9(12) |
| H15A-C15-H15C | 109.5    | F2_2-C2_2-C1_2 | 112.5(11) |
| H15B-C15-H15C | 109.5    | F1_2-C2_2-C1_2 | 111.7(10) |
| C18-C16-N6    | 113.6(7) | F3_2-C2_2-C1_2 | 108.5(10) |
| C18-C16-H16A  | 108.8    | F5_2-C3_2-F4_2 | 109.3(11) |
| N6-C16-H16A   | 108.8    | F5_2-C3_2-F6_2 | 107.7(11) |
| C18-C16-H16B  | 108.8    | F4_2-C3_2-F6_2 | 107.9(11) |



|                |           |                |           |
|----------------|-----------|----------------|-----------|
| F5_2-C3_2-C1_2 | 113.1(10) | F8_4-C4_4-F7_4 | 109.3(13) |
| F4_2-C3_2-C1_2 | 106.8(9)  | F9_4-C4_4-C1_4 | 115.2(12) |
| F6_2-C3_2-C1_2 | 111.9(11) | F8_4-C4_4-C1_4 | 108.9(12) |
| F9_2-C4_2-F8_2 | 106.1(12) | F7_4-C4_4-C1_4 | 111.9(12) |
| F9_2-C4_2-F7_2 | 104.2(12) | C1_5-O1_5-AI7  | 150.1(5)  |
| F8_2-C4_2-F7_2 | 109.1(12) | O1_5-C1_5-C3_5 | 111.2(6)  |
| F9_2-C4_2-C1_2 | 111.9(11) | O1_5-C1_5-C4_5 | 107.8(6)  |
| F8_2-C4_2-C1_2 | 112.0(11) | C3_5-C1_5-C4_5 | 109.2(6)  |
| F7_2-C4_2-C1_2 | 113.0(11) | O1_5-C1_5-C2_5 | 109.9(6)  |
| C1_3-O1_3-AI8  | 156.5(17) | C3_5-C1_5-C2_5 | 110.3(6)  |
| O1_3-C1_3-C3_3 | 111.2(12) | C4_5-C1_5-C2_5 | 108.3(6)  |
| O1_3-C1_3-C2_3 | 107.2(11) | F1_5-C2_5-F2_5 | 109.3(6)  |
| C3_3-C1_3-C2_3 | 110.1(9)  | F1_5-C2_5-F3_5 | 108.6(6)  |
| O1_3-C1_3-C4_3 | 110.8(12) | F2_5-C2_5-F3_5 | 107.6(7)  |
| C3_3-C1_3-C4_3 | 108.1(9)  | F1_5-C2_5-C1_5 | 111.0(6)  |
| C2_3-C1_3-C4_3 | 109.4(9)  | F2_5-C2_5-C1_5 | 111.4(6)  |
| F2_3-C2_3-F3_3 | 112.3(12) | F3_5-C2_5-C1_5 | 108.9(6)  |
| F2_3-C2_3-F1_3 | 102.4(11) | F6_5-C3_5-F4_5 | 108.8(7)  |
| F3_3-C2_3-F1_3 | 107.3(11) | F6_5-C3_5-F5_5 | 107.8(7)  |
| F2_3-C2_3-C1_3 | 112.7(10) | F4_5-C3_5-F5_5 | 105.1(7)  |
| F3_3-C2_3-C1_3 | 110.7(10) | F6_5-C3_5-C1_5 | 112.9(6)  |
| F1_3-C2_3-C1_3 | 111.0(10) | F4_5-C3_5-C1_5 | 111.0(6)  |
| F4_3-C3_3-F5_3 | 105.7(12) | F5_5-C3_5-C1_5 | 110.9(6)  |
| F4_3-C3_3-F6_3 | 107.1(12) | F9_5-C4_5-F7_5 | 107.5(7)  |
| F5_3-C3_3-F6_3 | 105.5(12) | F9_5-C4_5-F8_5 | 107.9(7)  |
| F4_3-C3_3-C1_3 | 113.1(12) | F7_5-C4_5-F8_5 | 106.1(7)  |
| F5_3-C3_3-C1_3 | 112.1(10) | F9_5-C4_5-C1_5 | 112.2(6)  |
| F6_3-C3_3-C1_3 | 112.8(10) | F7_5-C4_5-C1_5 | 111.2(7)  |
| F8_3-C4_3-F7_3 | 114.1(13) | F8_5-C4_5-C1_5 | 111.6(7)  |
| F8_3-C4_3-F9_3 | 105.6(12) | C1_6-O1_6-AI7  | 146.2(11) |
| F7_3-C4_3-F9_3 | 105.6(12) | O1_6-C1_6-C4_6 | 113.2(9)  |
| F8_3-C4_3-C1_3 | 112.7(11) | O1_6-C1_6-C2_6 | 107.1(9)  |
| F7_3-C4_3-C1_3 | 108.9(11) | C4_6-C1_6-C2_6 | 108.2(8)  |
| F9_3-C4_3-C1_3 | 109.4(10) | O1_6-C1_6-C3_6 | 110.2(9)  |
| C1_4-O1_4-AI8  | 152.3(19) | C4_6-C1_6-C3_6 | 108.7(8)  |
| O1_4-C1_4-C3_4 | 112.8(13) | C2_6-C1_6-C3_6 | 109.4(8)  |
| O1_4-C1_4-C2_4 | 109.7(13) | F1_6-C2_6-F3_6 | 106.7(9)  |
| C3_4-C1_4-C2_4 | 110.4(10) | F1_6-C2_6-F2_6 | 110.7(10) |
| O1_4-C1_4-C4_4 | 103.9(13) | F3_6-C2_6-F2_6 | 104.1(9)  |
| C3_4-C1_4-C4_4 | 109.4(10) | F1_6-C2_6-C1_6 | 110.9(9)  |
| C2_4-C1_4-C4_4 | 110.6(10) | F3_6-C2_6-C1_6 | 111.5(9)  |
| F3_4-C2_4-F2_4 | 107.4(12) | F2_6-C2_6-C1_6 | 112.7(9)  |
| F3_4-C2_4-F1_4 | 107.2(13) | F6_6-C3_6-F4_6 | 109.4(9)  |
| F2_4-C2_4-F1_4 | 105.3(12) | F6_6-C3_6-F5_6 | 108.3(9)  |
| F3_4-C2_4-C1_4 | 111.5(11) | F4_6-C3_6-F5_6 | 105.6(9)  |
| F2_4-C2_4-C1_4 | 115.5(12) | F6_6-C3_6-C1_6 | 113.4(9)  |
| F1_4-C2_4-C1_4 | 109.5(12) | F4_6-C3_6-C1_6 | 110.2(8)  |
| F4_4-C3_4-F6_4 | 111.3(13) | F5_6-C3_6-C1_6 | 109.6(8)  |
| F4_4-C3_4-F5_4 | 107.7(13) | F8_6-C4_6-F9_6 | 109.7(10) |
| F6_4-C3_4-F5_4 | 107.5(13) | F8_6-C4_6-F7_6 | 105.6(10) |
| F4_4-C3_4-C1_4 | 110.2(12) | F9_6-C4_6-F7_6 | 107.3(10) |
| F6_4-C3_4-C1_4 | 110.3(11) | F8_6-C4_6-C1_6 | 112.6(9)  |
| F5_4-C3_4-C1_4 | 109.8(12) | F9_6-C4_6-C1_6 | 109.7(9)  |
| F9_4-C4_4-F8_4 | 106.6(12) | F7_6-C4_6-C1_6 | 111.8(9)  |
| F9_4-C4_4-F7_4 | 104.6(13) | C1_7-O1_7-AI7  | 150.0(5)  |

|                |           |                   |           |
|----------------|-----------|-------------------|-----------|
| O1_7-C1_7-C4_7 | 108.4(6)  | C4_9-C1_9-C2_9    | 109.5(14) |
| O1_7-C1_7-C2_7 | 111.3(6)  | F3_9-C2_9-F2_9    | 108.3(19) |
| C4_7-C1_7-C2_7 | 109.5(6)  | F3_9-C2_9-F1_9    | 107(2)    |
| O1_7-C1_7-C3_7 | 110.1(6)  | F2_9-C2_9-F1_9    | 108(2)    |
| C4_7-C1_7-C3_7 | 108.3(6)  | F3_9-C2_9-C1_9    | 112.1(17) |
| C2_7-C1_7-C3_7 | 109.1(6)  | F2_9-C2_9-C1_9    | 113.4(18) |
| F1_7-C2_7-F2_7 | 108.4(7)  | F1_9-C2_9-C1_9    | 107.0(18) |
| F1_7-C2_7-F3_7 | 105.2(6)  | F5_9-C3_9-F4_9    | 108(2)    |
| F2_7-C2_7-F3_7 | 108.2(7)  | F5_9-C3_9-F6_9    | 106(2)    |
| F1_7-C2_7-C1_7 | 111.1(6)  | F4_9-C3_9-F6_9    | 105.8(19) |
| F2_7-C2_7-C1_7 | 113.5(6)  | F5_9-C3_9-C1_9    | 113(2)    |
| F3_7-C2_7-C1_7 | 110.1(6)  | F4_9-C3_9-C1_9    | 112.1(18) |
| F4_7-C3_7-F6_7 | 106.7(6)  | F6_9-C3_9-C1_9    | 112.1(18) |
| F4_7-C3_7-F5_7 | 107.8(7)  | F9_9-C4_9-F7_9    | 105.4(19) |
| F6_7-C3_7-F5_7 | 108.0(7)  | F9_9-C4_9-F8_9    | 109(2)    |
| F4_7-C3_7-C1_7 | 111.6(6)  | F7_9-C4_9-F8_9    | 105.0(19) |
| F6_7-C3_7-C1_7 | 111.4(6)  | F9_9-C4_9-C1_9    | 111.6(17) |
| F5_7-C3_7-C1_7 | 111.0(6)  | F7_9-C4_9-C1_9    | 112.7(17) |
| F7_7-C4_7-F9_7 | 108.3(7)  | F8_9-C4_9-C1_9    | 112.4(17) |
| F7_7-C4_7-F8_7 | 108.0(7)  | C1_11-O1_11-AI8   | 144.1(13) |
| F9_7-C4_7-F8_7 | 106.8(7)  | O1_11-C1_11-C4_11 | 112.4(11) |
| F7_7-C4_7-C1_7 | 110.1(7)  | O1_11-C1_11-C3_11 | 105.2(12) |
| F9_7-C4_7-C1_7 | 110.8(6)  | C4_11-C1_11-C3_11 | 108.4(9)  |
| F8_7-C4_7-C1_7 | 112.7(7)  | O1_11-C1_11-C2_11 | 109.5(11) |
| C1_8-O1_8-AI7  | 146.7(5)  | C4_11-C1_11-C2_11 | 113.6(10) |
| O1_8-C1_8-C4_8 | 110.8(5)  | C3_11-C1_11-C2_11 | 107.3(9)  |
| O1_8-C1_8-C2_8 | 107.0(6)  | F1_11-C2_11-F2_11 | 111.5(12) |
| C4_8-C1_8-C2_8 | 109.9(5)  | F1_11-C2_11-F3_11 | 105.8(14) |
| O1_8-C1_8-C3_8 | 111.1(5)  | F2_11-C2_11-F3_11 | 105.5(13) |
| C4_8-C1_8-C3_8 | 109.1(5)  | F1_11-C2_11-C1_11 | 109.6(11) |
| C2_8-C1_8-C3_8 | 108.8(5)  | F2_11-C2_11-C1_11 | 110.6(11) |
| F3_8-C2_8-F1_8 | 107.0(7)  | F3_11-C2_11-C1_11 | 113.6(12) |
| F3_8-C2_8-F2_8 | 108.2(6)  | F4_11-C3_11-F6_11 | 105.0(12) |
| F1_8-C2_8-F2_8 | 106.9(6)  | F4_11-C3_11-F5_11 | 108.6(12) |
| F3_8-C2_8-C1_8 | 111.5(6)  | F6_11-C3_11-F5_11 | 107.5(12) |
| F1_8-C2_8-C1_8 | 111.3(6)  | F4_11-C3_11-C1_11 | 111.6(10) |
| F2_8-C2_8-C1_8 | 111.7(6)  | F6_11-C3_11-C1_11 | 113.7(10) |
| F6_8-C3_8-F4_8 | 108.5(6)  | F5_11-C3_11-C1_11 | 110.2(12) |
| F6_8-C3_8-F5_8 | 108.2(6)  | F8_11-C4_11-F9_11 | 109.9(11) |
| F4_8-C3_8-F5_8 | 106.2(6)  | F8_11-C4_11-F7_11 | 98.9(12)  |
| F6_8-C3_8-C1_8 | 113.8(6)  | F9_11-C4_11-F7_11 | 106.2(12) |
| F4_8-C3_8-C1_8 | 110.2(5)  | F8_11-C4_11-C1_11 | 115.6(11) |
| F5_8-C3_8-C1_8 | 109.5(6)  | F9_11-C4_11-C1_11 | 113.7(11) |
| F9_8-C4_8-F8_8 | 107.7(6)  | F7_11-C4_11-C1_11 | 111.2(10) |
| F9_8-C4_8-F7_8 | 107.6(6)  | C1_13-O1_13-AI8   | 169.0(18) |
| F8_8-C4_8-F7_8 | 106.1(6)  | O1_13-C1_13-C4_13 | 108.9(12) |
| F9_8-C4_8-C1_8 | 110.7(6)  | O1_13-C1_13-C3_13 | 112.5(12) |
| F8_8-C4_8-C1_8 | 113.6(5)  | C4_13-C1_13-C3_13 | 110.2(11) |
| F7_8-C4_8-C1_8 | 110.8(5)  | O1_13-C1_13-C2_13 | 104.4(13) |
| C1_9-O1_9-AI8  | 149(3)    | C4_13-C1_13-C2_13 | 111.3(11) |
| O1_9-C1_9-C3_9 | 111.0(17) | C3_13-C1_13-C2_13 | 109.5(11) |
| O1_9-C1_9-C4_9 | 108.3(17) | F2_13-C2_13-F1_13 | 110.0(14) |
| C3_9-C1_9-C4_9 | 109.9(14) | F2_13-C2_13-F3_13 | 107.3(13) |
| O1_9-C1_9-C2_9 | 106.2(16) | F1_13-C2_13-F3_13 | 105.8(14) |
| C3_9-C1_9-C2_9 | 111.7(14) | F2_13-C2_13-C1_13 | 114.5(13) |

|                   |           |                    |           |
|-------------------|-----------|--------------------|-----------|
| F1_13-C2_13-C1_13 | 106.4(13) | F5_14-C3_14-C1_14  | 112.5(18) |
| F3_13-C2_13-C1_13 | 112.6(12) | F4_14-C3_14-C1_14  | 111.5(18) |
| F5_13-C3_13-F4_13 | 107.0(14) | F6_14-C3_14-C1_14  | 111.0(18) |
| F5_13-C3_13-F6_13 | 103.7(13) | F8_14-C4_14-F7_14  | 108(2)    |
| F4_13-C3_13-F6_13 | 104.6(13) | F8_14-C4_14-F9_14  | 109(2)    |
| F5_13-C3_13-C1_13 | 112.1(12) | F7_14-C4_14-F9_14  | 104(2)    |
| F4_13-C3_13-C1_13 | 116.6(13) | F8_14-C4_14-C1_14  | 111.5(18) |
| F6_13-C3_13-C1_13 | 111.8(12) | F7_14-C4_14-C1_14  | 113.3(19) |
| F9_13-C4_13-F7_13 | 106.2(14) | F9_14-C4_14-C1_14  | 111.3(18) |
| F9_13-C4_13-F8_13 | 106.6(14) | C5_15-C1_15-C2_15  | 108.6(6)  |
| F7_13-C4_13-F8_13 | 107.4(14) | C5_15-C1_15-C10_15 | 125.8(7)  |
| F9_13-C4_13-C1_13 | 116.6(13) | C2_15-C1_15-C10_15 | 125.5(7)  |
| F7_13-C4_13-C1_13 | 110.2(12) | C5_15-C1_15-AI2    | 70.5(4)   |
| F8_13-C4_13-C1_13 | 109.4(12) | C2_15-C1_15-AI2    | 72.6(4)   |
| C1_12-O1_12-AI7   | 146(3)    | C10_15-C1_15-AI2   | 125.5(5)  |
| O1_12-C1_12-C2_12 | 112.4(19) | C1_15-C2_15-C3_15  | 107.6(6)  |
| O1_12-C1_12-C3_12 | 106.5(18) | C1_15-C2_15-C9_15  | 126.5(7)  |
| C2_12-C1_12-C3_12 | 108.4(13) | C3_15-C2_15-C9_15  | 125.3(7)  |
| O1_12-C1_12-C4_12 | 111.6(18) | C1_15-C2_15-AI2    | 72.6(4)   |
| C2_12-C1_12-C4_12 | 106.8(12) | C3_15-C2_15-AI2    | 71.0(4)   |
| C3_12-C1_12-C4_12 | 111.2(13) | C9_15-C2_15-AI2    | 128.9(5)  |
| F3_12-C2_12-F1_12 | 115.7(19) | C2_15-C3_15-C4_15  | 108.6(6)  |
| F3_12-C2_12-F2_12 | 104.8(17) | C2_15-C3_15-C8_15  | 124.6(6)  |
| F1_12-C2_12-F2_12 | 106.8(18) | C4_15-C3_15-C8_15  | 126.7(6)  |
| F3_12-C2_12-C1_12 | 109.1(15) | C2_15-C3_15-AI2    | 73.7(4)   |
| F1_12-C2_12-C1_12 | 108.1(17) | C4_15-C3_15-AI2    | 71.6(4)   |
| F2_12-C2_12-C1_12 | 112.4(17) | C8_15-C3_15-AI2    | 124.1(5)  |
| F6_12-C3_12-F4_12 | 115(2)    | C3_15-C4_15-C5_15  | 107.0(6)  |
| F6_12-C3_12-F5_12 | 106.9(19) | C3_15-C4_15-C7_15  | 128.6(6)  |
| F4_12-C3_12-F5_12 | 105.3(17) | C5_15-C4_15-C7_15  | 124.3(6)  |
| F6_12-C3_12-C1_12 | 110.8(18) | C3_15-C4_15-AI2    | 72.8(4)   |
| F4_12-C3_12-C1_12 | 109.4(15) | C5_15-C4_15-AI2    | 71.9(4)   |
| F5_12-C3_12-C1_12 | 109.4(16) | C7_15-C4_15-AI2    | 122.5(5)  |
| F7_12-C4_12-F8_12 | 111.4(18) | C1_15-C5_15-C4_15  | 108.2(6)  |
| F7_12-C4_12-F9_12 | 109.6(18) | C1_15-C5_15-C6_15  | 127.8(7)  |
| F8_12-C4_12-F9_12 | 104.8(18) | C4_15-C5_15-C6_15  | 123.5(7)  |
| F7_12-C4_12-C1_12 | 109.6(16) | C1_15-C5_15-AI2    | 74.5(4)   |
| F8_12-C4_12-C1_12 | 111.9(16) | C4_15-C5_15-AI2    | 72.0(4)   |
| F9_12-C4_12-C1_12 | 109.5(15) | C6_15-C5_15-AI2    | 126.1(6)  |
| C1_14-O1_14-AI7   | 162(3)    | C5_15-C6_15-H6A_15 | 109.5     |
| O1_14-C1_14-C2_14 | 110.1(17) | C5_15-C6_15-H6B_15 | 109.5     |
| O1_14-C1_14-C3_14 | 107.5(17) | H6A_15-C6_15-      | 109.5     |
| C2_14-C1_14-C3_14 | 110.2(14) | H6B_15             |           |
| O1_14-C1_14-C4_14 | 106.4(17) | C5_15-C6_15-H6C_15 | 109.5     |
| C2_14-C1_14-C4_14 | 113.1(14) | H6A_15-C6_15-      | 109.5     |
| C3_14-C1_14-C4_14 | 109.4(14) | H6C_15             |           |
| F2_14-C2_14-F1_14 | 106.4(19) | H6B_15-C6_15-      | 109.5     |
| F2_14-C2_14-F3_14 | 104.4(19) | H6C_15             |           |
| F1_14-C2_14-F3_14 | 105.0(19) | C4_15-C7_15-H7A_15 | 109.5     |
| F2_14-C2_14-C1_14 | 114.0(18) | C4_15-C7_15-H7B_15 | 109.5     |
| F1_14-C2_14-C1_14 | 114.5(19) | H7A_15-C7_15-      | 109.5     |
| F3_14-C2_14-C1_14 | 111.7(18) | H7B_15             |           |
| F5_14-C3_14-F4_14 | 108(2)    | C4_15-C7_15-H7C_15 | 109.5     |
| F5_14-C3_14-F6_14 | 107(2)    | H7A_15-C7_15-      | 109.5     |
| F4_14-C3_14-F6_14 | 106(2)    | H7C_15             |           |

|                    |          |                    |          |
|--------------------|----------|--------------------|----------|
| H7B_15-C7_15-      | 109.5    | C7_16-C4_16-A11    | 127.5(5) |
| H7C_15             |          | C4_16-C5_16-C1_16  | 109.2(6) |
| C3_15-C8_15-H8A_15 | 109.5    | C4_16-C5_16-C6_16  | 125.5(7) |
| C3_15-C8_15-H8B_15 | 109.5    | C1_16-C5_16-C6_16  | 125.1(6) |
| H8A_15-C8_15-      | 109.5    | C4_16-C5_16-A11    | 72.6(4)  |
| H8B_15             |          | C1_16-C5_16-A11    | 70.6(4)  |
| C3_15-C8_15-H8C_15 | 109.5    | C6_16-C5_16-A11    | 126.6(5) |
| H8A_15-C8_15-      | 109.5    | C5_16-C6_16-H6A_16 | 109.5    |
| H8C_15             |          | C5_16-C6_16-H6B_16 | 109.5    |
| H8B_15-C8_15-      | 109.5    | H6A_16-C6_16-      | 109.5    |
| H8C_15             |          | H6B_16             |          |
| C2_15-C9_15-H9A_15 | 109.5    | C5_16-C6_16-H6C_16 | 109.5    |
| C2_15-C9_15-H9B_15 | 109.5    | H6A_16-C6_16-      | 109.5    |
| H9A_15-C9_15-      | 109.5    | H6C_16             |          |
| H9B_15             |          | H6B_16-C6_16-      | 109.5    |
| C2_15-C9_15-H9C_15 | 109.5    | H6C_16             |          |
| H9A_15-C9_15-      | 109.5    | C4_16-C7_16-H7A_16 | 109.5    |
| H9C_15             |          | C4_16-C7_16-H7B_16 | 109.5    |
| H9B_15-C9_15-      | 109.5    | H7A_16-C7_16-      | 109.5    |
| H9C_15             |          | H7B_16             |          |
| C1_15-C10_15-      | 109.5    | C4_16-C7_16-H7C_16 | 109.5    |
| H10A_15            |          | H7A_16-C7_16-      | 109.5    |
| C1_15-C10_15-      | 109.5    | H7C_16             |          |
| H10B_15            |          | H7B_16-C7_16-      | 109.5    |
| H10A_15-C10_15-    | 109.5    | H7C_16             |          |
| H10B_15            |          | C3_16-C8_16-H8A_16 | 109.5    |
| C1_15-C10_15-      | 109.5    | C3_16-C8_16-H8B_16 | 109.5    |
| H10C_15            |          | H8A_16-C8_16-      | 109.5    |
| H10A_15-C10_15-    | 109.5    | H8B_16             |          |
| H10C_15            |          | C3_16-C8_16-H8C_16 | 109.5    |
| H10B_15-C10_15-    | 109.5    | H8A_16-C8_16-      | 109.5    |
| H10C_15            |          | H8C_16             |          |
| C5_16-C1_16-C2_16  | 107.3(5) | H8B_16-C8_16-      | 109.5    |
| C5_16-C1_16-C10_16 | 126.5(6) | H8C_16             |          |
| C2_16-C1_16-C10_16 | 125.9(6) | C2_16-C9_16-H9A_16 | 109.5    |
| C5_16-C1_16-A11    | 75.0(4)  | C2_16-C9_16-H9B_16 | 109.5    |
| C2_16-C1_16-A11    | 70.1(3)  | H9A_16-C9_16-      | 109.5    |
| C10_16-C1_16-A11   | 125.8(4) | H9B_16             |          |
| C1_16-C2_16-C3_16  | 107.7(6) | C2_16-C9_16-H9C_16 | 109.5    |
| C1_16-C2_16-C9_16  | 124.8(6) | H9A_16-C9_16-      | 109.5    |
| C3_16-C2_16-C9_16  | 127.4(6) | H9C_16             |          |
| C1_16-C2_16-A11    | 74.5(3)  | H9B_16-C9_16-      | 109.5    |
| C3_16-C2_16-A11    | 73.3(3)  | H9C_16             |          |
| C9_16-C2_16-A11    | 121.2(4) | C1_16-C10_16-      | 109.5    |
| C4_16-C3_16-C2_16  | 108.6(5) | H10A_16            |          |
| C4_16-C3_16-C8_16  | 124.8(6) | C1_16-C10_16-      | 109.5    |
| C2_16-C3_16-C8_16  | 126.6(7) | H10B_16            |          |
| C4_16-C3_16-A11    | 75.5(4)  | H10A_16-C10_16-    | 109.5    |
| C2_16-C3_16-A11    | 71.0(3)  | H10B_16            |          |
| C8_16-C3_16-A11    | 120.8(4) | C1_16-C10_16-      | 109.5    |
| C5_16-C4_16-C3_16  | 107.3(6) | H10C_16            |          |
| C5_16-C4_16-C7_16  | 126.7(7) | H10A_16-C10_16-    | 109.5    |
| C3_16-C4_16-C7_16  | 125.6(7) | H10C_16            |          |
| C5_16-C4_16-A11    | 73.4(4)  | H10B_16-C10_16-    | 109.5    |
| C3_16-C4_16-A11    | 69.8(4)  | H10C_16            |          |

|                    |          |                    |          |
|--------------------|----------|--------------------|----------|
| C5_17-C1_17-C2_17  | 108.2(6) | H8B_17-C8_17-      | 109.5    |
| C5_17-C1_17-C10_17 | 126.7(7) | H8C_17             |          |
| C2_17-C1_17-C10_17 | 124.9(7) | C2_17-C9_17-H9A_17 | 109.5    |
| C5_17-C1_17-AI3    | 72.8(4)  | C2_17-C9_17-H9B_17 | 109.5    |
| C2_17-C1_17-AI3    | 69.7(3)  | H9A_17-C9_17-      | 109.5    |
| C10_17-C1_17-AI3   | 127.9(5) | H9B_17             |          |
| C3_17-C2_17-C1_17  | 108.4(6) | C2_17-C9_17-H9C_17 | 109.5    |
| C3_17-C2_17-C9_17  | 126.4(6) | H9A_17-C9_17-      | 109.5    |
| C1_17-C2_17-C9_17  | 125.0(6) | H9C_17             |          |
| C3_17-C2_17-AI3    | 70.8(4)  | H9B_17-C9_17-      | 109.5    |
| C1_17-C2_17-AI3    | 75.4(4)  | H9C_17             |          |
| C9_17-C2_17-AI3    | 123.4(5) | C1_17-C10_17-      | 109.5    |
| C2_17-C3_17-C4_17  | 107.5(6) | H10A_17            |          |
| C2_17-C3_17-C8_17  | 127.3(7) | C1_17-C10_17-      | 109.5    |
| C4_17-C3_17-C8_17  | 125.1(7) | H10B_17            |          |
| C2_17-C3_17-AI3    | 73.6(4)  | H10A_17-C10_17-    | 109.5    |
| C4_17-C3_17-AI3    | 73.4(4)  | H10B_17            |          |
| C8_17-C3_17-AI3    | 120.7(5) | C1_17-C10_17-      | 109.5    |
| C3_17-C4_17-C5_17  | 107.9(6) | H10C_17            |          |
| C3_17-C4_17-C7_17  | 127.3(8) | H10A_17-C10_17-    | 109.5    |
| C5_17-C4_17-C7_17  | 124.6(7) | H10C_17            |          |
| C3_17-C4_17-AI3    | 70.8(4)  | H10B_17-C10_17-    | 109.5    |
| C5_17-C4_17-AI3    | 75.2(4)  | H10C_17            |          |
| C7_17-C4_17-AI3    | 123.2(6) | C2_18-C1_18-C5_18  | 108.3(6) |
| C1_17-C5_17-C4_17  | 107.9(6) | C2_18-C1_18-C10_18 | 127.7(7) |
| C1_17-C5_17-C6_17  | 125.8(8) | C5_18-C1_18-C10_18 | 123.8(7) |
| C4_17-C5_17-C6_17  | 126.0(8) | C2_18-C1_18-AI4    | 73.9(3)  |
| C1_17-C5_17-AI3    | 73.2(4)  | C5_18-C1_18-AI4    | 73.3(4)  |
| C4_17-C5_17-AI3    | 69.6(4)  | C10_18-C1_18-AI4   | 122.9(5) |
| C6_17-C5_17-AI3    | 126.9(6) | C1_18-C2_18-C3_18  | 107.4(6) |
| C5_17-C6_17-H6A_17 | 109.5    | C1_18-C2_18-C9_18  | 127.0(6) |
| C5_17-C6_17-H6B_17 | 109.5    | C3_18-C2_18-C9_18  | 125.5(6) |
| H6A_17-C6_17-      | 109.5    | C1_18-C2_18-AI4    | 70.4(3)  |
| H6B_17             |          | C3_18-C2_18-AI4    | 74.1(3)  |
| C5_17-C6_17-H6C_17 | 109.5    | C9_18-C2_18-AI4    | 124.7(5) |
| H6A_17-C6_17-      | 109.5    | C4_18-C3_18-C2_18  | 108.8(6) |
| H6C_17             |          | C4_18-C3_18-C8_18  | 125.7(7) |
| H6B_17-C6_17-      | 109.5    | C2_18-C3_18-C8_18  | 125.0(6) |
| H6C_17             |          | C4_18-C3_18-AI4    | 72.5(4)  |
| C4_17-C7_17-H7A_17 | 109.5    | C2_18-C3_18-AI4    | 70.8(3)  |
| C4_17-C7_17-H7B_17 | 109.5    | C8_18-C3_18-AI4    | 129.0(5) |
| H7A_17-C7_17-      | 109.5    | C3_18-C4_18-C5_18  | 107.6(6) |
| H7B_17             |          | C3_18-C4_18-C7_18  | 127.1(7) |
| C4_17-C7_17-H7C_17 | 109.5    | C5_18-C4_18-C7_18  | 125.2(7) |
| H7A_17-C7_17-      | 109.5    | C3_18-C4_18-AI4    | 72.8(4)  |
| H7C_17             |          | C5_18-C4_18-AI4    | 70.5(4)  |
| H7B_17-C7_17-      | 109.5    | C7_18-C4_18-AI4    | 125.7(6) |
| H7C_17             |          | C4_18-C5_18-C1_18  | 107.9(6) |
| C3_17-C8_17-H8A_17 | 109.5    | C4_18-C5_18-C6_18  | 127.8(7) |
| C3_17-C8_17-H8B_17 | 109.5    | C1_18-C5_18-C6_18  | 124.1(7) |
| H8A_17-C8_17-      | 109.5    | C4_18-C5_18-AI4    | 74.2(5)  |
| H8B_17             |          | C1_18-C5_18-AI4    | 70.6(4)  |
| C3_17-C8_17-H8C_17 | 109.5    | C6_18-C5_18-AI4    | 124.4(6) |
| H8A_17-C8_17-      | 109.5    | C5_18-C6_18-H6A_18 | 109.5    |
| H8C_17             |          | C5_18-C6_18-H6B_18 | 109.5    |

|                    |          |                    |          |
|--------------------|----------|--------------------|----------|
| H6A_18-C6_18-      |          | C3_19-C2_19-AI5    | 74.8(4)  |
| H6B_18             | 109.5    | C1_19-C2_19-AI5    | 72.6(3)  |
| C5_18-C6_18-H6C_18 | 109.5    | C9_19-C2_19-AI5    | 122.0(4) |
| H6A_18-C6_18-      |          | C2_19-C3_19-C4_19  | 109.0(6) |
| H6C_18             | 109.5    | C2_19-C3_19-C8_19  | 125.0(8) |
| H6B_18-C6_18-      |          | C4_19-C3_19-C8_19  | 125.7(8) |
| H6C_18             | 109.5    | C2_19-C3_19-AI5    | 70.6(3)  |
| C4_18-C7_18-H7A_18 | 109.5    | C4_19-C3_19-AI5    | 74.5(4)  |
| C4_18-C7_18-H7B_18 | 109.5    | C8_19-C3_19-AI5    | 125.9(5) |
| H7A_18-C7_18-      |          | C5_19-C4_19-C3_19  | 106.8(6) |
| H7B_18             | 109.5    | C5_19-C4_19-C7_19  | 126.9(7) |
| C4_18-C7_18-H7C_18 | 109.5    | C3_19-C4_19-C7_19  | 126.2(7) |
| H7A_18-C7_18-      |          | C5_19-C4_19-AI5    | 71.8(4)  |
| H7C_18             | 109.5    | C3_19-C4_19-AI5    | 71.1(4)  |
| H7B_18-C7_18-      |          | C7_19-C4_19-AI5    | 124.9(5) |
| H7C_18             | 109.5    | C1_19-C5_19-C4_19  | 109.1(6) |
| C3_18-C8_18-H8A_18 | 109.5    | C1_19-C5_19-C6_19  | 125.9(6) |
| C3_18-C8_18-H8B_18 | 109.5    | C4_19-C5_19-C6_19  | 124.8(6) |
| H8A_18-C8_18-      |          | C1_19-C5_19-AI5    | 70.4(4)  |
| H8B_18             | 109.5    | C4_19-C5_19-AI5    | 74.0(4)  |
| C3_18-C8_18-H8C_18 | 109.5    | C6_19-C5_19-AI5    | 125.5(5) |
| H8A_18-C8_18-      |          | C5_19-C6_19-H6A_19 | 109.5    |
| H8C_18             | 109.5    | C5_19-C6_19-H6B_19 | 109.5    |
| H8B_18-C8_18-      |          | H6A_19-C6_19-      | 109.5    |
| H8C_18             | 109.5    | H6B_19             | 109.5    |
| C2_18-C9_18-H9A_18 | 109.5    | C5_19-C6_19-H6C_19 | 109.5    |
| C2_18-C9_18-H9B_18 | 109.5    | H6A_19-C6_19-      | 109.5    |
| H9A_18-C9_18-      |          | H6C_19             | 109.5    |
| H9B_18             | 109.5    | H6B_19-C6_19-      | 109.5    |
| C2_18-C9_18-H9C_18 | 109.5    | H6C_19             | 109.5    |
| H9A_18-C9_18-      |          | C4_19-C7_19-H7A_19 | 109.5    |
| H9C_18             | 109.5    | C4_19-C7_19-H7B_19 | 109.5    |
| H9B_18-C9_18-      |          | H7A_19-C7_19-      | 109.5    |
| H9C_18             | 109.5    | H7B_19             | 109.5    |
| C1_18-C10_18-      |          | C4_19-C7_19-H7C_19 | 109.5    |
| H10A_18            | 109.5    | H7A_19-C7_19-      | 109.5    |
| C1_18-C10_18-      |          | H7C_19             | 109.5    |
| H10B_18            | 109.5    | H7B_19-C7_19-      | 109.5    |
| H10A_18-C10_18-    |          | H7C_19             | 109.5    |
| H10B_18            | 109.5    | C3_19-C8_19-H8A_19 | 109.5    |
| C1_18-C10_18-      |          | C3_19-C8_19-H8B_19 | 109.5    |
| H10C_18            | 109.5    | H8A_19-C8_19-      | 109.5    |
| H10A_18-C10_18-    |          | H8B_19             | 109.5    |
| H10C_18            | 109.5    | C3_19-C8_19-H8C_19 | 109.5    |
| H10B_18-C10_18-    |          | H8A_19-C8_19-      | 109.5    |
| H10C_18            | 109.5    | H8C_19             | 109.5    |
| C5_19-C1_19-C2_19  | 107.3(6) | H8B_19-C8_19-      | 109.5    |
| C5_19-C1_19-C10_19 | 125.6(6) | H8C_19             | 109.5    |
| C2_19-C1_19-C10_19 | 127.0(6) | C2_19-C9_19-H9A_19 | 109.5    |
| C5_19-C1_19-AI5    | 74.9(4)  | C2_19-C9_19-H9B_19 | 109.5    |
| C2_19-C1_19-AI5    | 71.7(3)  | H9A_19-C9_19-      | 109.5    |
| C10_19-C1_19-AI5   | 121.9(5) | H9B_19             | 109.5    |
| C3_19-C2_19-C1_19  | 107.8(6) | C2_19-C9_19-H9C_19 | 109.5    |
| C3_19-C2_19-C9_19  | 125.5(7) | H9A_19-C9_19-      | 109.5    |
| C1_19-C2_19-C9_19  | 126.6(7) | H9C_19             | 109.5    |

|                            |          |                            |           |
|----------------------------|----------|----------------------------|-----------|
| H9B_19-C9_19-<br>H9C_19    | 109.5    | H7A_20-C7_20-<br>H7B_20    | 109.5     |
| C1_19-C10_19-<br>H10A_19   | 109.5    | C4_20-C7_20-H7C_20         | 109.5     |
| C1_19-C10_19-<br>H10B_19   | 109.5    | H7A_20-C7_20-<br>H7C_20    | 109.5     |
| H10A_19-C10_19-<br>H10B_19 | 109.5    | H7B_20-C7_20-<br>H7C_20    | 109.5     |
| C1_19-C10_19-<br>H10C_19   | 109.5    | C3_20-C8_20-H8A_20         | 109.5     |
| H10A_19-C10_19-<br>H10C_19 | 109.5    | C3_20-C8_20-H8B_20         | 109.5     |
| H10B_19-C10_19-<br>H10C_19 | 109.5    | H8A_20-C8_20-<br>H8B_20    | 109.5     |
| C5_20-C1_20-C2_20          | 107.0(6) | C3_20-C8_20-H8C_20         | 109.5     |
| C5_20-C1_20-C10_20         | 127.9(7) | H8A_20-C8_20-<br>H8C_20    | 109.5     |
| C2_20-C1_20-C10_20         | 125.2(7) | H8B_20-C8_20-<br>H8C_20    | 109.5     |
| C5_20-C1_20-A16            | 73.9(4)  | C2_20-C9_20-H9A_20         | 109.5     |
| C2_20-C1_20-A16            | 72.1(3)  | C2_20-C9_20-H9B_20         | 109.5     |
| C10_20-C1_20-A16           | 120.5(5) | H9A_20-C9_20-<br>H9B_20    | 109.5     |
| C3_20-C2_20-C1_20          | 108.3(6) | C2_20-C9_20-H9C_20         | 109.5     |
| C3_20-C2_20-C9_20          | 125.7(7) | H9A_20-C9_20-<br>H9C_20    | 109.5     |
| C1_20-C2_20-C9_20          | 125.5(7) | H9B_20-C9_20-<br>H9C_20    | 109.5     |
| C3_20-C2_20-A16            | 75.6(4)  | C1_20-C10_20-<br>H10A_20   | 109.5     |
| C1_20-C2_20-A16            | 71.5(4)  | C1_20-C10_20-<br>H10B_20   | 109.5     |
| C9_20-C2_20-A16            | 124.8(5) | H10A_20-C10_20-<br>H10B_20 | 109.5     |
| C4_20-C3_20-C2_20          | 108.5(6) | C1_20-C10_20-<br>H10C_20   | 109.5     |
| C4_20-C3_20-C8_20          | 127.0(8) | H10A_20-C10_20-<br>H10C_20 | 109.5     |
| C2_20-C3_20-C8_20          | 124.2(7) | H10B_20-C10_20-<br>H10C_20 | 109.5     |
| C4_20-C3_20-A16            | 73.7(4)  | C1_10-O1_10-A18            | 142(3)    |
| C2_20-C3_20-A16            | 69.1(4)  | O1_10-C1_10-C4_10          | 111.0(17) |
| C8_20-C3_20-A16            | 127.6(6) | O1_10-C1_10-C2_10          | 111.2(17) |
| C3_20-C4_20-C5_20          | 107.0(6) | C4_10-C1_10-C2_10          | 113.6(13) |
| C3_20-C4_20-C7_20          | 127.8(7) | O1_10-C1_10-C3_10          | 106.5(17) |
| C5_20-C4_20-C7_20          | 124.6(7) | C4_10-C1_10-C3_10          | 108.7(12) |
| C3_20-C4_20-A16            | 71.9(4)  | C2_10-C1_10-C3_10          | 105.5(12) |
| C5_20-C4_20-A16            | 69.7(5)  | F1_10-C2_10-F2_10          | 107.2(16) |
| C7_20-C4_20-A16            | 130.4(6) | F1_10-C2_10-F3_10          | 107.4(17) |
| C1_20-C5_20-C4_20          | 109.2(6) | F2_10-C2_10-F3_10          | 105.6(15) |
| C1_20-C5_20-C6_20          | 126.0(7) | F1_10-C2_10-C1_10          | 113.8(15) |
| C4_20-C5_20-C6_20          | 124.7(7) | F2_10-C2_10-C1_10          | 111.0(14) |
| C1_20-C5_20-A16            | 70.6(4)  | F3_10-C2_10-C1_10          | 111.3(14) |
| C4_20-C5_20-A16            | 75.2(5)  | F4_10-C3_10-F6_10          | 107.3(16) |
| C6_20-C5_20-A16            | 122.5(6) | F4_10-C3_10-F5_10          | 112.5(18) |
| C5_20-C6_20-H6A_20         | 109.5    | F6_10-C3_10-F5_10          | 110.6(17) |
| C5_20-C6_20-H6B_20         | 109.5    | F4_10-C3_10-C1_10          | 107.6(15) |
| H6A_20-C6_20-<br>H6B_20    | 109.5    | F6_10-C3_10-C1_10          | 109.2(15) |
| C5_20-C6_20-H6C_20         | 109.5    |                            |           |
| H6A_20-C6_20-<br>H6C_20    | 109.5    |                            |           |
| H6B_20-C6_20-<br>H6C_20    | 109.5    |                            |           |
| C4_20-C7_20-H7A_20         | 109.5    |                            |           |
| C4_20-C7_20-H7B_20         | 109.5    |                            |           |

|                   |           |
|-------------------|-----------|
| F5_10-C3_10-C1_10 | 109.5(15) |
| F9_10-C4_10-F8_10 | 106.6(16) |
| F9_10-C4_10-F7_10 | 108.7(17) |
| F8_10-C4_10-F7_10 | 106.3(16) |
| F9_10-C4_10-C1_10 | 113.2(15) |
| F8_10-C4_10-C1_10 | 110.0(15) |
| F7_10-C4_10-C1_10 | 111.7(15) |
| C1_21-O1_21-A18   | 154(2)    |
| O1_21-C1_21-C2_21 | 110.5(15) |
| O1_21-C1_21-C3_21 | 112.6(16) |
| C2_21-C1_21-C3_21 | 109.9(13) |
| O1_21-C1_21-C4_21 | 104.1(15) |
| C2_21-C1_21-C4_21 | 112.6(13) |
| C3_21-C1_21-C4_21 | 107.0(13) |
| F1_21-C2_21-F2_21 | 107.8(18) |
| F1_21-C2_21-F3_21 | 108.8(18) |
| F2_21-C2_21-F3_21 | 107.6(17) |
| F1_21-C2_21-C1_21 | 111.2(16) |
| F2_21-C2_21-C1_21 | 111.5(16) |
| F3_21-C2_21-C1_21 | 109.9(16) |
| F4_21-C3_21-F5_21 | 107.4(18) |
| F4_21-C3_21-F6_21 | 107.0(17) |
| F5_21-C3_21-F6_21 | 111.1(18) |
| F4_21-C3_21-C1_21 | 113.5(16) |
| F5_21-C3_21-C1_21 | 108.1(16) |
| F6_21-C3_21-C1_21 | 109.8(16) |
| F8_21-C4_21-F7_21 | 112.2(18) |
| F8_21-C4_21-F9_21 | 106.5(17) |
| F7_21-C4_21-F9_21 | 110.2(18) |
| F8_21-C4_21-C1_21 | 114.1(17) |
| F7_21-C4_21-C1_21 | 107.5(16) |
| F9_21-C4_21-C1_21 | 106.2(15) |



## S-6 References

- [1] H. W. Roesky, D. K. Kennepohl, *Experiments in green and sustainable chemistry*, Wiley-VCH, Weinheim, **2009**.
- [2] J. M. Slattery, A. Higelin, T. Bayer, I. Krossing, *Angew. Chem. Int. Ed.* **2010**, *49*, 3228.
- [3] S. Welsch, M. Bodensteiner, M. Dušek, M. Sierka, M. Scheer, *Chem. Eur. J.* **2010**, *16*, 13041.
- [4] M. Gonsior, I. Krossing, N. Mitzel, *Z. Anorg. Allg. Chem.* **2002**, *628*, 1821.
- [5] C. Ganesamoorthy, S. Loerke, C. Gemel, P. Jerabek, M. Winter, G. Frenking, R. A. Fischer, *Chem. Commun.* **2013**, *49*, 2858.
- [6] J. Cosier, A. M. Glazer, *J. Appl. Crystallogr.* **1986**, *19*, 105.
- [7] a) G. M. Sheldrick, *Acta Crystallogr. A* **2008**, *64*, 112; b) D. Kratzert, J. J. Holstein, I. Krossing, *J. Appl. Crystallogr.* **2015**, *48*, 933.
- [8] Daniel Kratzert, can be found under <https://www.xs3.uni-freiburg.de/research/finalcif>.
- [9] D. Del Rio, I. Resa, A. Rodriguez, L. Sánchez, R. Köppe, A. J. Downs, C. Y. Tang, E. Carmona, *J. Phys. Chem. A* **2008**, *112*, 10516.
- [10] É. Bencze, B. V. Lokshin, J. Mink\*, W. A. Herrmann, F. E. Kühn\*, *J. Organomet. Chem.* **2001**, *627*, 55.
- [11] K. Wieghardt, M. Kleine-Boymann, B. Nuber, J. Weiss, *Inorg. Chem.* **1986**, *25*, 1309.
- [12] a) M. von Arnim, R. Ahlrichs, *J. Comput. Chem.* **1998**, *19*, 1746; b) O. Treutler, R. Ahlrichs, *J. Chem. Phys.* **1995**, *102*, 346.
- [13] a) Perdew, *Phys. Rev. B Condens. Matter* **1986**, *33*, 8822; b) J. P. Perdew, *Phys. Rev. B Condens. Matter* **1986**, *34*, 7406.
- [14] F. Weigend, R. Ahlrichs, *Phys. Chem. Chem. Phys.* **2005**, *7*, 3297.
- [15] a) M. Sierka, A. Hogekamp, R. Ahlrichs, *J. Chem. Phys.* **2003**, *118*, 9136; b) R. Ahlrichs, *Phys. Chem. Chem. Phys.* **2004**, *6*, 5119; c) F. Weigend, *Phys. Chem. Chem. Phys.* **2006**, *8*, 1057.
- [16] a) S. Grimme, J. Antony, S. Ehrlich, H. Krieg, *J. Chem. Phys.* **2010**, *132*, 154104; b) S. Grimme, S. Ehrlich, L. Goerigk, *J. Comput. Chem.* **2011**, *32*, 1456.
- [17] P. Deglmann, F. Furche, R. Ahlrichs, *Chem. Phys. Lett.* **2002**, *362*, 511.
- [18] F. Furche, R. Ahlrichs, *J. Chem. Phys.* **2002**, *117*, 7433.
- [19] a) A. Klamt, *J. Phys. Chem.* **1995**, *99*, 2224; b) A. Klamt, V. Jonas, T. Bürger, J. C. W. Lohrenz, *J. Phys. Chem. A* **1998**, *102*, 5074.
- [20] D. Rappoport, F. Furche, *J. Chem. Phys.* **2010**, *133*, 134105.

- [21] A. K. F. Eckert, *Version C3.0, Release 15.01* **2014**, COSMOlogic GMBH & Co. KG, Leverkusen, Germany.
- [22] a) C. Adamo, V. Barone, *J. Chem. Phys.* **1999**, *110*, 6158; b) J. P. Perdew, M. Ernzerhof, K. Burke, *J. Chem. Phys.* **1996**, *105*, 9982.
- [23] a) P. J. Stephens, F. J. Devlin, C. F. Chabalowski, M. J. Frisch, *J. Phys. Chem.* **1994**, *98*, 11623; b) A. D. Becke, *J. Chem. Phys.* **1993**, *98*, 5648; c) Lee, Yang, Parr, *Phys. Rev. B Condens. Matter* **1988**, *37*, 785.
- [24] T. Lu, F. Chen, *J. Comput. Chem.* **2012**, *33*, 580.
- [25] M. P. Mitoraj, A. Michalak, T. Ziegler, *J. Chem. Theory Comput.* **2009**, *5*, 962.
- [26] G. te Velde, F. M. Bickelhaupt, E. J. Baerends, C. Fonseca Guerra, S. J. A. van Gisbergen, J. G. Snijders, T. Ziegler, *J. Comput. Chem.* **2001**, *22*, 931.
- [27] R. F. W. Bader, H. Essén, *J. Chem. Phys.* **1984**, *80*, 1943.
- [28] C. Silva Lopez, A. R. de Lera, *COC* **2011**, *15*, 3576.
- [29] a) G. Frenking, F. Matthias Bickelhaupt in *The Chemical Bond* (Eds.: G. Frenking, S. Shaik), Wiley-VCH Verlag GmbH & Co. KGaA, Weinheim, Germany, **2014**, pp. 121–157; b) L. Zhao, W. H. E. Schwarz, G. Frenking, *Nat. Rev. Chem.* **2019**, *3*, 35.
- [30] L. Zhao, M. von Hopffgarten, D. M. Andrada, G. Frenking, *WIREs Comput Mol Sci* **2018**, *8*.
